# Supplementary material for: H3.3 G34W Promotes Growth and Impedes Differentiation of Osteoblast-Like Mesenchymal Progenitors in Giant Cell Tumor of Bone
Source: Oxford University Press journal article supplement (doi:10.1158/2159-8290.cd-20-0461), 2020-09-23
Supplement: 21598290cd200461-sup-241016_2_supp_6571114_qgmhq8.xlsx [file 21598290cd200461-sup-241016_2_supp_6571114_qgmhq8.xlsx]

## Sheet: Sample Overview
Table S1. Sample characteristics and quality control.
Tumor Metadata							Assays
Patient ID	Genotype	Sex	Age	Tumor location	Metastases	Recurrence after surgery	Immortalization (Cell Line)	Xenograft (Cell Line)	RNA-seq (Cell Line)	ChIP-seq (Cell Line)	scRNA-seq (Tumour)	snRNA-Seq (Xenografts)	Histone Mass Spec (Cell Line)	Secretome Mass Spec (Cell Line) MS
P-4072	H3.3 G34W	M	22	R tibia	N	Y	Y	Y	Y	Y	-	Y	Y	Y
P-3504	H3.3 G34W	M	30	L femur	N	Y	Y	N	Y	Y	-	-	-	-
P-6176	H3.3 G34W	M	28	R femur	-	-	Y	Y	Y	-	-	Y	-	-
P-3474	H3.3 G34W	M	42	R femur	N	N	-	-	-	-	-	-	-	-
P-5071	H3.3 G34W	F	29	R radius	-	-	-	-	-	-	Y	-	-	-
P-6028	H3.3 G34W	M	31	R femur	-	-	-	-	-	-	Y	-	-	-
P-5874	H3.3 G34W	M	44	L tibia	-	-	-	-	-	-	Y	-	-	-
P-6027	H3.3 G34W	M	31	R ulna	-	-	-	-	-	-	(#)	-	-	-
P-4671	H3.3 G34W	F	49	L tibia	-	Y	-	-	-	-	Y (*)	-	-	-
P-4724	H3.3 G34W	F	32	L sacrum	-	-	-	-	-	-	-	-	Y	-
P-4779	H3.3 G34W	F	34	L tibia	-	-	-	-	-	-	-	-	Y	-
P-2611	H3.3 G34W	-	-	-	-	-	-	-	-	-	-	-	Y	-
# scRNA-seq of P-6027 was excluded due to failing to meet single cell quality inclusion criteria, see methods.
* scRNA-seq of P-4671 was performed on the recurrence.

## Sheet: RNA-seq
Table S1. Sample characteristics and quality control.
Sample	Batch	Machine	Adaptor	Condition	Genotype	Patient	Clone	Total Read #	Clean %	Mapped %	Mito %	Ribo %
Im-GCT-4072__2B2__T11__G34W-unedited__RNA	4287	Illumina HiSeq 4000 PE100	Illumina TruSeq LT	G34W	G34W unedited	Im-GCT-4072	2B2	159444738	0.7989	0.9133	0.0077	0.0456
Im-GCT-4072__2B2__T14__G34W-unedited__RNA	4277	Illumina HiSeq 4000 PE100	Illumina TruSeq LT	G34W	G34W unedited	Im-GCT-4072	2B2	207652800	0.7824	0.9367	0.0081	0.0286
Im-GCT-4072__2B2__T3-11__G34W-unedited__RNA	4692	Illumina HiSeq 4000 PE100	Illumina TruSeq LT	G34W	G34W unedited	Im-GCT-4072	2B2	94463616	0.7098	0.9264	0.0008	0.0426
Im-GCT-4072__parental__p14__G34W-parental__RNA	4287	Illumina HiSeq 4000 PE100	Illumina TruSeq LT	G34W	G34W	Im-GCT-4072	parental	104274214	0.8167	0.8898	0.0073	0.0336
Im-GCT-4072__parental__p16__G34W-parental__RNA	4277	Illumina HiSeq 4000 PE100	Illumina TruSeq LT	G34W	G34W	Im-GCT-4072	parental	192956854	0.7746	0.9436	0.0079	0.0395
Im-GCT-4072__parental__p23__G34W-parental__RNA	4440	Illumina HiSeq 4000 PE100	Illumina TruSeq LT	G34W	G34W	Im-GCT-4072	parental	115714352	0.8175	0.9339	0.0052	0.0463
Im-GCT-4072__parental__p3__G34W-parental__RNA	4214	Illumina HiSeq 4000 PE100	Illumina TruSeq LT	G34W	G34W	Im-GCT-4072	parental	91548530	0.6888	0.9315	0.0096	0.0102
Im-GCT-4072__A1__p16__G34W-KO__RNA	4287	Illumina HiSeq 4000 PE100	Illumina TruSeq LT	Edited	G34W-KO	Im-GCT-4072	A1	137282568	0.8036	0.9181	0.0043	0.0442
Im-GCT-4072__A1__p18__G34W-KO__RNA	4277	Illumina HiSeq 4000 PE100	Illumina TruSeq LT	Edited	G34W-KO	Im-GCT-4072	A1	165039094	0.7175	0.9369	0.0073	0.0291
Im-GCT-4072__A1__p8__G34W-KO__RNA	4214	Illumina HiSeq 4000 PE100	Illumina TruSeq LT	Edited	G34W-KO	Im-GCT-4072	A1	97468842	0.6895	0.9284	0.0045	0.0447
Im-GCT-4072__D6__p16__G34W-repair__RNA	4287	Illumina HiSeq 4000 PE100	Illumina TruSeq LT	Edited	G34W repair to WT	Im-GCT-4072	D6	194406246	0.8051	0.9325	0.0057	0.0338
Im-GCT-4072__D6__p18__G34W-repair__RNA	4277	Illumina HiSeq 4000 PE100	Illumina TruSeq LT	Edited	G34W repair to WT	Im-GCT-4072	D6	155912050	0.794	0.9238	0.0077	0.0242
Im-GCT-4072__D6__p8__G34W-repair__RNA	4214	Illumina HiSeq 4000 PE100	Illumina TruSeq LT	Edited	G34W repair to WT	Im-GCT-4072	D6	100448812	0.6886	0.9333	0.0044	0.029
Im-GCT-4072__E3__p10__G34W-repair__RNA	4440	Illumina HiSeq 4000 PE100	Illumina TruSeq LT	Edited	G34W repair to WT	Im-GCT-4072	E3	126836784	0.8153	0.9512	0.0049	0.0261
Im-GCT-4072__E3__p7-T1__G34W-repair__RNA	4692	Illumina HiSeq 4000 PE100	Illumina TruSeq LT	Edited	G34W repair to WT	Im-GCT-4072	E3	96822934	0.7173	0.9212	0.0005	0.0258
Im-GCT-4072__E3__p7-T2__G34W-repair__RNA	4692	Illumina HiSeq 4000 PE100	Illumina TruSeq LT	Edited	G34W repair to WT	Im-GCT-4072	E3	132015424	0.7447	0.9258	0.0005	0.0257
Im-GCT-3504__parental__T1-p11__G34W-parental__RNA	4692	Illumina HiSeq 4000 PE100	Illumina TruSeq LT	G34W	G34W	Im-GCT-3504	parental	103340302	0.7402	0.9256	0.0005	0.0275
Im-GCT-3504__parental__T2-p11__G34W-parental__RNA	4692	Illumina HiSeq 4000 PE100	Illumina TruSeq LT	G34W	G34W	Im-GCT-3504	parental	94133856	0.7418	0.9109	0.0005	0.0271
Im-GCT-3504__parental__T3-p11__G34W-parental__RNA	4692	Illumina HiSeq 4000 PE100	Illumina TruSeq LT	G34W	G34W	Im-GCT-3504	parental	120906146	0.6922	0.9282	0.0004	0.0283
Im-GCT-3504__U1__T1-P12T3__G34W-unedited__RNA	4692	Illumina HiSeq 4000 PE100	Illumina TruSeq LT	G34W	G34W unedited	Im-GCT-3504	U1	120906038	0.6967	0.9321	0.0009	0.0347
Im-GCT-3504__U1__T2-P12T3__G34W-unedited__RNA	4692	Illumina HiSeq 4000 PE100	Illumina TruSeq LT	G34W	G34W unedited	Im-GCT-3504	U1	115766248	0.7343	0.9325	0.001	0.0346
Im-GCT-3504__U1__T3-P12T3__G34W-unedited__RNA	4692	Illumina HiSeq 4000 PE100	Illumina TruSeq LT	G34W	G34W unedited	Im-GCT-3504	U1	112552880	0.7508	0.9305	0.0008	0.0371
Im-GCT-3504__4C7__T1-T9__G34W-repair__RNA	4692	Illumina HiSeq 4000 PE100	Illumina TruSeq LT	Edited	G34W repair to WT	Im-GCT-3504	4C7	144116740	0.7181	0.9149	0.0005	0.0259
Im-GCT-3504__4C7__T2-T9__G34W-repair__RNA	4692	Illumina HiSeq 4000 PE100	Illumina TruSeq LT	Edited	G34W repair to WT	Im-GCT-3504	4C7	119753684	0.7184	0.9023	0.0007	0.0244
Im-GCT-3504__4C7__T3-T9__G34W-repair__RNA	4692	Illumina HiSeq 4000 PE100	Illumina TruSeq LT	Edited	G34W repair to WT	Im-GCT-3504	4C7	155103768	0.7381	0.9067	0.0006	0.0248
Im-GCT-3504__4F5__T1-T8__G34W-repair__RNA	4692	Illumina HiSeq 4000 PE100	Illumina TruSeq LT	Edited	G34W repair to WT	Im-GCT-3504	4F5	124840452	0.7459	0.918	0.0008	0.0275
Im-GCT-3504__4F5__T2-T8__G34W-repair__RNA	4692	Illumina HiSeq 4000 PE100	Illumina TruSeq LT	Edited	G34W repair to WT	Im-GCT-3504	4F5	154883502	0.7483	0.9188	0.001	0.0261
Im-GCT-3504__4F5__T3-T8__G34W-repair__RNA	4692	Illumina HiSeq 4000 PE100	Illumina TruSeq LT	Edited	G34W repair to WT	Im-GCT-3504	4F5	105730692	0.7033	0.9084	0.0006	0.0277
Im-GCT-6176__1F4__p15__G34W-repair	1349	Illumina NovaSeq 6000 S4 PE100	NebNext Dual	Edited	G34W repair to WT	Im-GCT-6176	1F4	133884620	0.824	0.8684	0.0145	0.0227
Im-GCT-6176__1F4__p21__G34W-repair	1349	Illumina NovaSeq 6000 S4 PE100	NebNext Dual	Edited	G34W repair to WT	Im-GCT-6176	1F4	135022470	0.8207	0.8684	0.0336	0.0268
Im-GCT-6176__1G9__p13__G34W-KO	1349	Illumina NovaSeq 6000 S4 PE100	NebNext Dual	Edited	G34W-KO	Im-GCT-6176	1G9	138571874	0.8295	0.8812	0.0313	0.015
Im-GCT-6176__1G9__p14__G34W-KO	1349	Illumina NovaSeq 6000 S4 PE100	NebNext Dual	Edited	G34W-KO	Im-GCT-6176	1G9	140415798	0.8318	0.8812	0.034	0.0167
Im-GCT-6176__2C2__p14__G34W-repair	1349	Illumina NovaSeq 6000 S4 PE100	NebNext Dual	Edited	G34W repair to WT	Im-GCT-6176	2C2	120519790	0.8275	0.8908	0.0347	0.0166
Im-GCT-6176__2C2__p20__G34W-repair	1349	Illumina NovaSeq 6000 S4 PE100	NebNext Dual	Edited	G34W repair to WT	Im-GCT-6176	2C2	171302406	0.833	0.8996	0.0253	0.0157
Im-GCT-6176__U12__p16__G34W-unedited	1349	Illumina NovaSeq 6000 S4 PE100	NebNext Dual	G34W	G34W unedited	Im-GCT-6176	U12	262399264	0.7815	0.8835	0.0252	0.0188
Im-GCT-6176__U12__p17__G34W-unedited	1349	Illumina NovaSeq 6000 S4 PE100	NebNext Dual	G34W	G34W unedited	Im-GCT-6176	U12	287967436	0.819	0.8741	0.0266	0.0185
Im-GCT-6176__parental__p15__G34W-parental	1349	Illumina NovaSeq 6000 S4 PE100	NebNext Dual	G34W	G34W	Im-GCT-6176	parental	120129982	0.8427	0.8703	0.0366	0.0227
Im-GCT-6176__parental__p16__G34W-parental	1349	Illumina NovaSeq 6000 S4 PE100	NebNext Dual	G34W	G34W	Im-GCT-6176	parental	227604826	0.8294	0.8727	0.0388	0.021

## Sheet: ChIP-seq
Table S1. Sample characteristics and quality control.
Sample	Batch	Machine	Adaptor	IP	Mark	Corresponding Input	Condition	Genotype	Patient	Clone	Mapped Read #	Duplicate %	Peak #	FrIP	NSC	RSC
Im-GCT-4072__2B2__T11__G34W-unedited__H3.3	4290	Illumina HiSeq 4000 SE50	Illumina TruSeq LT	H3.3	Narrow	Im-GCT-4072__2B2__T11__G34W-unedited__Input	G34W	G34W unedited	Im-GCT-4072	2B2	37284611	0.1099	123659	0.2068	1.0411	0.6655
Im-GCT-3504__4C7__T11__G34W-repair__H3K27me3	4771	Illumina HiSeq 4000 SE50	Illumina TruSeq LT	H3K27me3	Broad	Im-GCT-3504__4C7__T11__G34W-repair__Input	Edited	G34W repair to WT	Im-GCT-3504	4C7	21952682	0.1333	#N/A	#N/A	1.049	0.6162
Im-GCT-3504__4C7__T11__G34W-repair__H3K36me2	4771	Illumina HiSeq 4000 SE50	Illumina TruSeq LT	H3K36me2	Broad	Im-GCT-3504__4C7__T11__G34W-repair__Input	Edited	G34W repair to WT	Im-GCT-3504	4C7	24763432	0.1178	#N/A	#N/A	1.016	0.4333
Im-GCT-3504__4C7__T11__G34W-repair__H3K36me3	4771	Illumina HiSeq 4000 SE50	Illumina TruSeq LT	H3K36me3	Broad	Im-GCT-3504__4C7__T11__G34W-repair__Input	Edited	G34W repair to WT	Im-GCT-3504	4C7	58043576	0.171	#N/A	#N/A	1.0094	0.6527
Im-GCT-3504__4C7__T11__G34W-repair__Input	4771	Illumina HiSeq 4000 SE50	Illumina TruSeq LT	Input	Input	Im-GCT-3504__4C7__T11__G34W-repair__Input	Edited	G34W repair to WT	Im-GCT-3504	4C7	13722659	0.0725	#N/A	#N/A	1.0162	0.139
Im-GCT-4072__parental__p14__G34W-parental__H3.3	4290	Illumina HiSeq 4000 SE50	Illumina TruSeq LT	H3.3	Narrow	Im-GCT-4072__parental__p14__G34W-parental__Input	G34W	G34W	Im-GCT-4072	parental	37182351	0.0857	59888	0.067	1.0167	0.4068
Im-GCT-3504__4F5__T11__G34W-repair__H3K27me3	4771	Illumina HiSeq 4000 SE50	Illumina TruSeq LT	H3K27me3	Broad	Im-GCT-3504__4F5__T11__G34W-repair__Input	Edited	G34W repair to WT	Im-GCT-3504	4F5	17237001	0.1111	#N/A	#N/A	1.0676	0.7991
Im-GCT-3504__4F5__T11__G34W-repair__H3K36me2	4771	Illumina HiSeq 4000 SE50	Illumina TruSeq LT	H3K36me2	Broad	Im-GCT-3504__4F5__T11__G34W-repair__Input	Edited	G34W repair to WT	Im-GCT-3504	4F5	19450031	0.0992	#N/A	#N/A	1.0159	0.2983
Im-GCT-3504__4F5__T11__G34W-repair__H3K36me3	4771	Illumina HiSeq 4000 SE50	Illumina TruSeq LT	H3K36me3	Broad	Im-GCT-3504__4F5__T11__G34W-repair__Input	Edited	G34W repair to WT	Im-GCT-3504	4F5	27168490	0.0863	#N/A	#N/A	1.0105	0.3431
Im-GCT-3504__4F5__T11__G34W-repair__Input	4771	Illumina HiSeq 4000 SE50	Illumina TruSeq LT	Input	Input	Im-GCT-3504__4F5__T11__G34W-repair__Input	Edited	G34W repair to WT	Im-GCT-3504	4F5	12412650	0.0735	#N/A	#N/A	1.0217	0.1493
Im-GCT-4072__A1__p16__G34W-KO__H3.3	4290	Illumina HiSeq 4000 SE50	Illumina TruSeq LT	H3.3	Narrow	Im-GCT-4072__A1__p16__G34W-KO__Input	Edited	G34W KO	Im-GCT-4072	A1	34937756	0.1165	131320	0.173	1.0294	0.5363
Im-GCT-3504__U1__T8__G34W-unedited__H3K27me3	4771	Illumina HiSeq 4000 SE50	Illumina TruSeq LT	H3K27me3	Broad	Im-GCT-3504__U1__T8__G34W-unedited__Input	G34W	G34W unedited	Im-GCT-3504	U1	37896319	0.1162	#N/A	#N/A	1.0129	0.3454
Im-GCT-3504__U1__T8__G34W-unedited__H3K36me2	4771	Illumina HiSeq 4000 SE50	Illumina TruSeq LT	H3K36me2	Broad	Im-GCT-3504__U1__T8__G34W-unedited__Input	G34W	G34W unedited	Im-GCT-3504	U1	23626620	0.123	#N/A	#N/A	1.0157	0.4003
Im-GCT-3504__U1__T8__G34W-unedited__H3K36me3	4771	Illumina HiSeq 4000 SE50	Illumina TruSeq LT	H3K36me3	Broad	Im-GCT-3504__U1__T8__G34W-unedited__Input	G34W	G34W unedited	Im-GCT-3504	U1	15916856	0.061	#N/A	#N/A	1.0125	0.23
Im-GCT-3504__U1__T8__G34W-unedited__Input	4771	Illumina HiSeq 4000 SE50	Illumina TruSeq LT	Input	Input	Im-GCT-3504__U1__T8__G34W-unedited__Input	G34W	G34W unedited	Im-GCT-3504	U1	9665558	0.0665	#N/A	#N/A	1.0256	0.1396
Im-GCT-4072__D6__p8__G34W-repair__H3.3	4290	Illumina HiSeq 4000 SE50	Illumina TruSeq LT	H3.3	Narrow	Im-GCT-4072__D6__p8__G34W-repair__Input	Edited	G34W repair to WT	Im-GCT-4072	D6	62141421	0.6812	156222	0.2044	1.0707	0.8142
Im-GCT-3504__parental__p15__G34W-parental__H3K27me3	4771	Illumina HiSeq 4000 SE50	Illumina TruSeq LT	H3K27me3	Broad	Im-GCT-3504__parental__p15__G34W-parental__Input	G34W	G34W	Im-GCT-3504	parental	16641171	0.0813	#N/A	#N/A	1.0306	0.3809
Im-GCT-3504__parental__p15__G34W-parental__H3K36me2	4771	Illumina HiSeq 4000 SE50	Illumina TruSeq LT	H3K36me2	Broad	Im-GCT-3504__parental__p15__G34W-parental__Input	G34W	G34W	Im-GCT-3504	parental	17427138	0.0909	#N/A	#N/A	1.018	0.3073
Im-GCT-3504__parental__p15__G34W-parental__H3K36me3	4771	Illumina HiSeq 4000 SE50	Illumina TruSeq LT	H3K36me3	Broad	Im-GCT-3504__parental__p15__G34W-parental__Input	G34W	G34W	Im-GCT-3504	parental	30734428	0.1231	#N/A	#N/A	1.0128	0.4303
Im-GCT-3504__parental__p15__G34W-parental__Input	4771	Illumina HiSeq 4000 SE50	Illumina TruSeq LT	Input	Input	Im-GCT-3504__parental__p15__G34W-parental__Input	G34W	G34W	Im-GCT-3504	parental	9758006	0.054	#N/A	#N/A	1.0257	0.1315
Im-GCT-4072__E3__p10__G34W-repair__H3.3	4484	Illumina HiSeq 4000 SE50	Illumina TruSeq LT	H3.3	Narrow	Im-GCT-4072__E3__p10__G34W-repair__Input	Edited	G34W repair to WT	Im-GCT-4072	E3	40553183	0.1626	58070	0.0646	1.02	0.4361
Im-GCT-4072__2B2__none__G34W-unedited__H3K36me2	4290	Illumina HiSeq 4000 SE50	Illumina TruSeq LT	H3K36me2	Broad	Im-GCT-4072__2B2__none__G34W-unedited__Input	G34W	G34W unedited	Im-GCT-4072	2B2	32711704	0.0731	#N/A	#N/A	1.0096	0.2574
Im-GCT-4072__2B2__none__G34W-unedited__H3K36me3	4290	Illumina HiSeq 4000 SE50	Illumina TruSeq LT	H3K36me3	Broad	Im-GCT-4072__2B2__none__G34W-unedited__Input	G34W	G34W unedited	Im-GCT-4072	2B2	32985465	0.1006	#N/A	#N/A	1.0117	0.343
Im-GCT-4072__2B2__none__G34W-unedited__Input	4290	Illumina HiSeq 4000 SE50	Illumina TruSeq LT	Input	Input	Im-GCT-4072__2B2__none__G34W-unedited__Input	G34W	G34W unedited	Im-GCT-4072	2B2	30686156	0.078	#N/A	#N/A	1.0074	0.1297
Im-GCT-3504__4C7__T18__G34W-repair__H3.3	4904	Illumina HiSeq 4000 SE50	Illumina TruSeq LT	H3.3	Narrow	Im-GCT-3504__4C7__T18__G34W-repair__Input	Edited	G34W repair to WT	Im-GCT-3504	4C7	18536279	0.0401	33624	0.0311	1.0174	0.1977
Im-GCT-4072__2B2__T11__G34W-unedited__H3K27me3	4484	Illumina HiSeq 4000 SE50	Illumina TruSeq LT	H3K27me3	Broad	Im-GCT-4072__2B2__T11__G34W-unedited__Input	G34W	G34W unedited	Im-GCT-4072	2B2	94732274	0.532	#N/A	#N/A	1.0211	0.5553
Im-GCT-4072__2B2__T11__G34W-unedited__Input	4290	Illumina HiSeq 4000 SE50	Illumina TruSeq LT	Input	Input	Im-GCT-4072__2B2__T11__G34W-unedited__Input	G34W	G34W unedited	Im-GCT-4072	2B2	29627331	0.066	#N/A	#N/A	1.0061	0.1
Im-GCT-4072__2B2__T19__G34W-unedited__Input	4484	Illumina HiSeq 4000 SE50	Illumina TruSeq LT	Input	Input	Im-GCT-4072__2B2__T19__G34W-unedited__Input	G34W	G34W unedited	Im-GCT-4072	2B2	34421209	0.167	#N/A	#N/A	1.0054	0.1259
Im-GCT-3504__4F5__T15__G34W-repair__H3.3	4904	Illumina HiSeq 4000 SE50	Illumina TruSeq LT	H3.3	Narrow	Im-GCT-3504__4F5__T15__G34W-repair__Input	Edited	G34W repair to WT	Im-GCT-3504	4F5	14316469	0.0343	31322	0.0374	1.0206	0.2223
Im-GCT-3504__U1__p17-T8__G34W-unedited__H3.3	4904	Illumina HiSeq 4000 SE50	Illumina TruSeq LT	H3.3	Narrow	Im-GCT-3504__U1__p17-T8__G34W-unedited__Input	G34W	G34W unedited	Im-GCT-3504	U1	15465483	0.0298	3495	0.005	1.0188	0.2094
Im-GCT-3504__parental__p20__G34W-parental__H3.3	4904	Illumina HiSeq 4000 SE50	Illumina TruSeq LT	H3.3	Narrow	Im-GCT-3504__parental__p20__G34W-parental__Input	G34W	G34W	Im-GCT-3504	parental	14837284	0.0365	7420	0.0092	1.0193	0.2113
Im-GCT-4072__2B2__none__G34W-unedited__H3.3G34W	4290	Illumina HiSeq 4000 SE50	Illumina TruSeq LT	H3.3G34W	Narrow	Im-GCT-4072__2B2__none__G34W-unedited__Input	G34W	G34W unedited	Im-GCT-4072	2B2	45307212	0.1005	24505	0.0199	1.0117	0.3031
Im-GCT-4072__A1__p16__G34W-KO__H3K27me3	4484	Illumina HiSeq 4000 SE50	Illumina TruSeq LT	H3K27me3	Broad	Im-GCT-4072__A1__p16__G34W-KO__Input	Edited	G34W KO	Im-GCT-4072	A1	94491870	0.545	#N/A	#N/A	1.0206	0.5945
Im-GCT-4072__A1__p16__G34W-KO__Input	4290	Illumina HiSeq 4000 SE50	Illumina TruSeq LT	Input	Input	Im-GCT-4072__A1__p16__G34W-KO__Input	Edited	G34W KO	Im-GCT-4072	A1	42881913	0.1609	#N/A	#N/A	1.0092	0.2304
Im-GCT-4072__A1__p8__G34W-KO__H3K36me2	4252	Illumina HiSeq 4000 SE50	Illumina TruSeq LT	H3K36me2	Broad	Im-GCT-4072__A1__p8__G34W-KO__Input	Edited	G34W KO	Im-GCT-4072	A1	55296162	0.043	#N/A	#N/A	1.0059	0.3353
Im-GCT-4072__A1__p8__G34W-KO__H3K36me3	4191	Illumina HiSeq 4000 SE50	Illumina TruSeq LT	H3K36me3	Broad	Im-GCT-4072__A1__p8__G34W-KO__Input	Edited	G34W KO	Im-GCT-4072	A1	30396110	0.0596	#N/A	#N/A	1.0065	0.2104
Im-GCT-4072__A1__p8__G34W-KO__Input	4290	Illumina HiSeq 4000 SE50	Illumina TruSeq LT	Input	Input	Im-GCT-4072__A1__p8__G34W-KO__Input	Edited	G34W KO	Im-GCT-4072	A1	41469660	0.0879	#N/A	#N/A	1.006	0.1424
Im-GCT-4072__D6__p16__G34W-repair__H3K27me3	4290	Illumina HiSeq 4000 SE50	Illumina TruSeq LT	H3K27me3	Broad	Im-GCT-4072__D6__p16__G34W-repair__Input	Edited	G34W repair to WT	Im-GCT-4072	D6	26328893	0.0685	#N/A	#N/A	1.0141	0.3495
Im-GCT-3504__4C7__T11__G34W-repair__H3K27ac	4771	Illumina HiSeq 4000 SE50	Illumina TruSeq LT	H3K27ac	Narrow	Im-GCT-3504__4C7__T11__G34W-repair__Input	Edited	G34W repair to WT	Im-GCT-3504	4C7	14895751	0.0915	82285	0.5164	1.8545	1.524
Im-GCT-4072__D6__p16__G34W-repair__Input	4290	Illumina HiSeq 4000 SE50	Illumina TruSeq LT	Input	Input	Im-GCT-4072__D6__p16__G34W-repair__Input	Edited	G34W repair to WT	Im-GCT-4072	D6	49914232	0.1297	#N/A	#N/A	1.0061	0.1883
Im-GCT-4072__D6__p8__G34W-repair__H3K36me2	4252	Illumina HiSeq 4000 SE50	Illumina TruSeq LT	H3K36me2	Broad	Im-GCT-4072__D6__p8__G34W-repair__Input	Edited	G34W repair to WT	Im-GCT-4072	D6	40892229	0.0385	#N/A	#N/A	1.0073	0.31
Im-GCT-4072__D6__p8__G34W-repair__H3K36me3	4191	Illumina HiSeq 4000 SE50	Illumina TruSeq LT	H3K36me3	Broad	Im-GCT-4072__D6__p8__G34W-repair__Input	Edited	G34W repair to WT	Im-GCT-4072	D6	35993180	0.0875	#N/A	#N/A	1.0097	0.3518
Im-GCT-4072__D6__p8__G34W-repair__Input	4290	Illumina HiSeq 4000 SE50	Illumina TruSeq LT	Input	Input	Im-GCT-4072__D6__p8__G34W-repair__Input	Edited	G34W repair to WT	Im-GCT-4072	D6	36701837	0.0962	#N/A	#N/A	1.0059	0.1212
Im-GCT-3504__4F5__T11__G34W-repair__H3K27ac	4771	Illumina HiSeq 4000 SE50	Illumina TruSeq LT	H3K27ac	Narrow	Im-GCT-3504__4F5__T11__G34W-repair__Input	Edited	G34W repair to WT	Im-GCT-3504	4F5	25046897	0.1522	66812	0.4875	2.2273	1.4525
Im-GCT-3504__U1__T8__G34W-unedited__H3K27ac	4771	Illumina HiSeq 4000 SE50	Illumina TruSeq LT	H3K27ac	Narrow	Im-GCT-3504__U1__T8__G34W-unedited__Input	G34W	G34W unedited	Im-GCT-3504	U1	18294542	0.1475	56294	0.4541	2.4721	1.5359
Im-GCT-4072__E3__p10__G34W-repair__H3K36me3	4484	Illumina HiSeq 4000 SE50	Illumina TruSeq LT	H3K36me3	Broad	Im-GCT-4072__E3__p10__G34W-repair__Input	Edited	G34W repair to WT	Im-GCT-4072	E3	50265330	0.1794	#N/A	#N/A	1.0057	0.2763
Im-GCT-4072__E3__p10__G34W-repair__Input	4484	Illumina HiSeq 4000 SE50	Illumina TruSeq LT	Input	Input	Im-GCT-4072__E3__p10__G34W-repair__Input	Edited	G34W repair to WT	Im-GCT-4072	E3	24342286	0.1585	#N/A	#N/A	1.0103	0.127
Im-GCT-4072__E3__p5__G34W-repair__H3K27me3	4586	Illumina HiSeq 4000 SE50	Illumina TruSeq LT	H3K27me3	Broad	Im-GCT-4072__E3__p5__G34W-repair__Input	Edited	G34W repair to WT	Im-GCT-4072	E3	41552543	0.1677	#N/A	#N/A	1.011	0.43
Im-GCT-4072__E3__p5__G34W-repair__H3K36me2	4586	Illumina HiSeq 4000 SE50	Illumina TruSeq LT	H3K36me2	Broad	Im-GCT-4072__E3__p5__G34W-repair__Input	Edited	G34W repair to WT	Im-GCT-4072	E3	68338517	0.223	#N/A	#N/A	1.0049	0.2921
Im-GCT-4072__E3__p5__G34W-repair__Input	4591	Illumina HiSeq 4000 SE50	Illumina TruSeq LT	Input	Input	Im-GCT-4072__E3__p5__G34W-repair__Input	Edited	G34W repair to WT	Im-GCT-4072	E3	35678002	0.1182	#N/A	#N/A	1.0058	0.1332
Im-GCT-4072__parental__p14__G34W-parental__H3K27me3	4290	Illumina HiSeq 4000 SE50	Illumina TruSeq LT	H3K27me3	Broad	Im-GCT-4072__parental__p14__G34W-parental__Input	G34W	G34W	Im-GCT-4072	parental	57888834	0.1243	#N/A	#N/A	1.0171	0.5775
Im-GCT-4072__parental__p14__G34W-parental__H3.3G34W	4290	Illumina HiSeq 4000 SE50	Illumina TruSeq LT	H3.3G34W	Narrow	Im-GCT-4072__parental__p14__G34W-parental__Input	G34W	G34W	Im-GCT-4072	parental	39622008	0.0766	42100	0.036	1.0153	0.3954
Im-GCT-3504__parental__p15__G34W-parental__H3K27ac	4771	Illumina HiSeq 4000 SE50	Illumina TruSeq LT	H3K27ac	Narrow	Im-GCT-3504__parental__p15__G34W-parental__Input	G34W	G34W	Im-GCT-3504	parental	18973875	0.1496	51265	0.4145	2.29	1.5199
Im-GCT-4072__2B2__T19__G34W-unedited__H3K27ac	4484	Illumina HiSeq 4000 SE50	Illumina TruSeq LT	H3K27ac	Narrow	Im-GCT-4072__2B2__T19__G34W-unedited__Input	G34W	G34W unedited	Im-GCT-4072	2B2	25854500	0.1609	102926	0.4189	1.2315	1.3651
Im-GCT-4072__parental__p14__G34W-parental__H3K36me2	4290	Illumina HiSeq 4000 SE50	Illumina TruSeq LT	H3K36me2	Broad	Im-GCT-4072__parental__p14__G34W-parental__Input	G34W	G34W	Im-GCT-4072	parental	31112035	0.07	#N/A	#N/A	1.0073	0.2305
Im-GCT-4072__parental__p14__G34W-parental__Input	4290	Illumina HiSeq 4000 SE50	Illumina TruSeq LT	Input	Input	Im-GCT-4072__parental__p14__G34W-parental__Input	G34W	G34W	Im-GCT-4072	parental	32480409	0.0725	#N/A	#N/A	1.0052	0.1252
Im-GCT-4072__parental__p7__G34W-parental__H3K36me3	4191	Illumina HiSeq 4000 SE50	Illumina TruSeq LT	H3K36me3	Broad	Im-GCT-4072__parental__p7__G34W-parental__Input	G34W	G34W	Im-GCT-4072	parental	28962121	0.0641	#N/A	#N/A	1.0097	0.3007
Im-GCT-4072__parental__p7__G34W-parental__Input	4290	Illumina HiSeq 4000 SE50	Illumina TruSeq LT	Input	Input	Im-GCT-4072__parental__p7__G34W-parental__Input	G34W	G34W	Im-GCT-4072	parental	57825513	0.0762	#N/A	#N/A	1.0043	0.1523
Im-GCT-4072__parental__p14__G34W-parental__H3K27ac	4484	Illumina HiSeq 4000 SE50	Illumina TruSeq LT	H3K27ac	Narrow	Im-GCT-4072__parental__p14__G34W-parental__Input	G34W	G34W	Im-GCT-4072	parental	17136917	0.1611	90509	0.4119	1.3234	1.2187
Im-GCT-3504__4C7__T18__G34W-repair__Input	4904	Illumina HiSeq 4000 SE50	Illumina TruSeq LT	Input	Input	Im-GCT-3504__4C7__T18__G34W-repair__Input	Edited	G34W repair to WT	Im-GCT-3504	4C7	38196064	0.0665	#N/A	#N/A	1.016	0.2954
Im-GCT-4072__A1__p16__G34W-KO__H3K27ac	4484	Illumina HiSeq 4000 SE50	Illumina TruSeq LT	H3K27ac	Narrow	Im-GCT-4072__A1__p16__G34W-KO__Input	Edited	G34W KO	Im-GCT-4072	A1	20092574	0.1718	97474	0.5685	1.4162	1.2292
Im-GCT-3504__4F5__T15__G34W-repair__Input	4904	Illumina HiSeq 4000 SE50	Illumina TruSeq LT	Input	Input	Im-GCT-3504__4F5__T15__G34W-repair__Input	Edited	G34W repair to WT	Im-GCT-3504	4F5	14487899	0.025	#N/A	#N/A	1.0143	0.118
Im-GCT-4072__D6__p16__G34W-repair__H3K27ac	4484	Illumina HiSeq 4000 SE50	Illumina TruSeq LT	H3K27ac	Narrow	Im-GCT-4072__D6__p16__G34W-repair__Input	Edited	G34W repair to WT	Im-GCT-4072	D6	28448405	0.2068	97363	0.6511	1.3872	1.2163
Im-GCT-3504__U1__p17-T8__G34W-unedited__Input	4904	Illumina HiSeq 4000 SE50	Illumina TruSeq LT	Input	Input	Im-GCT-3504__U1__p17-T8__G34W-unedited__Input	G34W	G34W unedited	Im-GCT-3504	U1	10765012	0.0357	#N/A	#N/A	1.0217	0.1247
Im-GCT-4072__E3__p10__G34W-repair__H3K27ac	4484	Illumina HiSeq 4000 SE50	Illumina TruSeq LT	H3K27ac	Narrow	Im-GCT-4072__E3__p10__G34W-repair__Input	Edited	G34W repair to WT	Im-GCT-4072	E3	16438018	0.1949	93737	0.5934	1.4283	1.1693
Im-GCT-3504__parental__p20__G34W-parental__Input	4904	Illumina HiSeq 4000 SE50	Illumina TruSeq LT	Input	Input	Im-GCT-3504__parental__p20__G34W-parental__Input	G34W	G34W	Im-GCT-3504	parental	16351345	0.0308	#N/A	#N/A	1.0128	0.1317
Im-GCT-4072__2B2__T19__G34W-unedited__H3K9me3	4904	Illumina HiSeq 4000 SE50	Illumina TruSeq LT	H3K9me3	Broad	Im-GCT-4072__2B2__T19__G34W-unedited__Input	G34W	G34W unedited	Im-GCT-4072	2B2	18146436	0.1473	#N/A	#N/A	1.0233	0.1258
Im-GCT-4072__D6__p11__G34W-repair__H3K9me3	4904	Illumina HiSeq 4000 SE50	Illumina TruSeq LT	H3K9me3	Broad	Im-GCT-4072__D6__p11__G34W-repair__Input	Edited	G34W repair to WT	Im-GCT-4072	D6	26092996	0.044	#N/A	#N/A	1.0226	0.1537
Im-GCT-4072__E3__p7__G34W-repair__H3K9me3	4904	Illumina HiSeq 4000 SE50	Illumina TruSeq LT	H3K9me3	Broad	Im-GCT-4072__E3__p7__G34W-repair__Input	Edited	G34W repair to WT	Im-GCT-4072	E3	21510572	0.038	#N/A	#N/A	1.0265	0.1576
Im-GCT-4072__E3__p7__G34W-repair__Input	4904	Illumina HiSeq 4000 SE50	Illumina TruSeq LT	Input	Input	Im-GCT-4072__E3__p7__G34W-repair__Input	Edited	G34W repair to WT	Im-GCT-4072	E3	14159748	0.0314	#N/A	#N/A	1.0143	0.1053
Im-GCT-4072__parental__p15__G34W-parental__H3K9me3	4904	Illumina HiSeq 4000 SE50	Illumina TruSeq LT	H3K9me3	Broad	Im-GCT-4072__parental__p14__G34W-parental__Input	G34W	G34W	Im-GCT-4072	parental	24085561	0.0291	#N/A	#N/A	1.0151	0.1239
Im-GCT-4072__D6__p11__G34W-repair__Input	4935	Illumina HiSeq 4000 SE50	Illumina TruSeq LT	Input	Input	Im-GCT-4072__D6__p11__G34W-repair__Input	Edited	G34W repair to WT	Im-GCT-4072	D6	27150324	0.0549	#N/A	#N/A	1.0145	0.1603
Im-GCT-4072__D6-OE-G34W__p15__G34W-repair-OE-H3.3G34W__Input	5096	Illumina HiSeq 4000 PE100	Illumina TruSeq LT	Input	Input	Im-GCT-4072__D6-OE-G34W__p15__G34W-repair-OE-H3.3G34W__Input	Edited O/E H3.3G34W	G34W repair to WT + O/E H3.3G34W	Im-GCT-4072	D6	96771872	0.2135	#N/A	#N/A	1.0392	1.284
Im-GCT-4072__D6-OE-WT__p15__G34W-repair-OE-H3.3WT__Input	5096	Illumina HiSeq 4000 PE100	Illumina TruSeq LT	Input	Input	Im-GCT-4072__D6-OE-WT__p15__G34W-repair-OE-H3.3WT__Input	Edited O/E H3.3WT	G34W repair to WT + O/E H3.3WT	Im-GCT-4072	D6	55114573	0.0948	#N/A	#N/A	1.0552	1.7383
Im-GCT-4072__E3-OE-G34W__p15__G34W-repair-OE-H3.3G34W__Input	5096	Illumina HiSeq 4000 PE100	Illumina TruSeq LT	Input	Input	Im-GCT-4072__E3-OE-G34W__p15__G34W-repair-OE-H3.3G34W__Input	Edited O/E H3.3G34W	G34W repair to WT + O/E H3.3G34W	Im-GCT-4072	E3	97888305	0.059	#N/A	#N/A	1.0249	1.2441
Im-GCT-4072__E3-OE-WT__p15__G34W-repair-OE-H3.3WT__Input	5096	Illumina HiSeq 4000 PE100	Illumina TruSeq LT	Input	Input	Im-GCT-4072__E3-OE-WT__p15__G34W-repair-OE-H3.3WT__Input	Edited O/E H3.3WT	G34W repair to WT + O/E H3.3WT	Im-GCT-4072	E3	77537381	0.0766	#N/A	#N/A	1.0354	1.433
Im-GCT-4072__D6-OE-G34W__p15__G34W-repair-OE-H3.3G34W__H3K27me3	5110	Illumina HiSeq 4000 SE50	Illumina TruSeq LT	H3K27me3	Broad	Im-GCT-4072__D6-OE-G34W__p15__G34W-repair-OE-H3.3G34W__Input	Edited O/E H3.3G34W	G34W repair to WT + O/E H3.3G34W	Im-GCT-4072	D6	29336669	0.0358	137641	0.4907	1.011	0.2582
Im-GCT-4072__D6-OE-WT__p15__G34W-repair-OE-H3.3WT__H3K27me3	5110	Illumina HiSeq 4000 SE50	Illumina TruSeq LT	H3K27me3	Broad	Im-GCT-4072__D6-OE-WT__p15__G34W-repair-OE-H3.3WT__Input	Edited O/E H3.3WT	G34W repair to WT + O/E H3.3WT	Im-GCT-4072	D6	25156810	0.0472	127133	0.598	1.014	0.3576
Im-GCT-4072__E3-OE-G34W__p15__G34W-repair-OE-H3.3G34W__H3K27me3	5110	Illumina HiSeq 4000 SE50	Illumina TruSeq LT	H3K27me3	Broad	Im-GCT-4072__E3-OE-G34W__p15__G34W-repair-OE-H3.3G34W__Input	Edited O/E H3.3G34W	G34W repair to WT + O/E H3.3G34W	Im-GCT-4072	E3	32691422	0.0384	131456	0.599	1.0107	0.3408
Im-GCT-4072__E3-OE-WT__p15__G34W-repair-OE-H3.3WT__H3K27me3	5110	Illumina HiSeq 4000 SE50	Illumina TruSeq LT	H3K27me3	Broad	Im-GCT-4072__E3-OE-WT__p15__G34W-repair-OE-H3.3WT__Input	Edited O/E H3.3WT	G34W repair to WT + O/E H3.3WT	Im-GCT-4072	E3	27929540	0.0375	135208	0.6292	1.0113	0.2897
Im-GCT-4072__parental__p21__G34W-parental__SUZ12	JAB954	Illumina NovaSeq 6000 S4 PE50	NebNext Dual	SUZ12	Broad	Im-GCT-4072__parental__p21__G34W-parental__Input	G34W	G34W	Im-GCT-4072	parental	31599683	0.2709	#N/A	#N/A	1.1529	2.158
Im-GCT-4072__2B2__T19__G34W-unedited__SUZ12	JAB954	Illumina NovaSeq 6000 S4 PE50	NebNext Dual	SUZ12	Broad	Im-GCT-4072__2B2__T19__G34W-unedited__Input	G34W	G34W unedited	Im-GCT-4072	2B2	73587531	0.1853	#N/A	#N/A	1.0603	3.0731
Im-GCT-4072__U3__T14__G34W-unedited__SUZ12	JAB954	Illumina NovaSeq 6000 S4 PE50	NebNext Dual	SUZ12	Broad	Im-GCT-4072__U3__T14__G34W-unedited__Input	G34W	G34W unedited	Im-GCT-4072	U3	33618817	0.4807	#N/A	#N/A	1.2129	2.0738
Im-GCT-4072__D6__p28p24__G34W-repair__SUZ12	JAB954	Illumina NovaSeq 6000 S4 PE50	NebNext Dual	SUZ12	Broad	Im-GCT-4072__D6__p18p24__G34W-repair__Input	Edited	G34W repair to WT	Im-GCT-4072	D6	54865808	0.2047	#N/A	#N/A	1.0942	2.2167
Im-GCT-4072__E3__p14__G34W-repair__SUZ12	JAB954	Illumina NovaSeq 6000 S4 PE50	NebNext Dual	SUZ12	Broad	Im-GCT-4072__E3__p14__G34W-repair__Input	Edited	G34W repair to WT	Im-GCT-4072	E3	50619780	0.1779	#N/A	#N/A	1.0986	2.1225
Im-GCT-4072__A4__p13p16__G34W-repair__SUZ12	JAB954	Illumina NovaSeq 6000 S4 PE50	NebNext Dual	SUZ12	Broad	Im-GCT-4072__A4__p13p16__G34W-repair__Input	Edited	G34W repair to WT	Im-GCT-4072	A4	42827063	0.1067	#N/A	#N/A	1.0885	2.0779
Im-GCT-4072__parental__p21__G34W-parental__Input	JAB954	Illumina NovaSeq 6000 S4 PE50	NebNext Dual	SUZ12	Input	Im-GCT-4072__parental__p21__G34W-parental__Input	G34W	G34W	Im-GCT-4072	parental	29658252	0.0543	#N/A	#N/A	1.111	2.3273
Im-GCT-4072__2B2__T19__G34W-unedited__Input	JAB954	Illumina NovaSeq 6000 S4 PE50	NebNext Dual	SUZ12	Input	Im-GCT-4072__2B2__T19__G34W-unedited__Input	G34W	G34W unedited	Im-GCT-4072	2B2	31339939	0.0513	#N/A	#N/A	1.1048	2.8273
Im-GCT-4072__U3__T14__G34W-unedited__Input	JAB954	Illumina NovaSeq 6000 S4 PE50	NebNext Dual	SUZ12	Input	Im-GCT-4072__U3__T14__G34W-unedited__Input	G34W	G34W unedited	Im-GCT-4072	U3	28665620	0.0571	#N/A	#N/A	1.1175	2.8249
Im-GCT-4072__D6__p18p24__G34W-repair__Input	JAB954	Illumina NovaSeq 6000 S4 PE50	NebNext Dual	SUZ12	Input	Im-GCT-4072__D6__p18p24__G34W-repair__Input	Edited	G34W repair to WT	Im-GCT-4072	D6	38804424	0.0534	#N/A	#N/A	1.0864	2.2297
Im-GCT-4072__E3__p14__G34W-repair__Input	JAB954	Illumina NovaSeq 6000 S4 PE50	NebNext Dual	SUZ12	Input	Im-GCT-4072__E3__p14__G34W-repair__Input	Edited	G34W repair to WT	Im-GCT-4072	E3	40728683	0.0565	#N/A	#N/A	1.0795	2.1742
Im-GCT-4072__A4__p13p16__G34W-repair__Input	JAB954	Illumina NovaSeq 6000 S4 PE50	NebNext Dual	SUZ12	Input	Im-GCT-4072__A4__p13p16__G34W-repair__Input	Edited	G34W repair to WT	Im-GCT-4072	A4	34137169	0.0483	#N/A	#N/A	1.0966	2.177
Im-GCT-4072__U3__T14__G34W-unedited__H3K27ac	JAB954	Illumina NovaSeq 6000 S4 PE50	NebNext Dual	H3K27ac	Narrow	Im-GCT-4072__E3__p14__G34W-repair__Input	G34W	G34W unedited	Im-GCT-4072	U3	25268874	0.1762	44453	0.1971	1.278	1.8796
Im-GCT-4072__A4__p13p16__G34W-repair__H3K27ac	JAB954	Illumina NovaSeq 6000 S4 PE50	NebNext Dual	H3K27ac	Narrow	Im-GCT-4072__A4__p13p16__G34W-repair__Input	Edited	G34W repair to WT	Im-GCT-4072	A4	39720774	0.0676	56700	0.2885	1.3044	1.5195

## Sheet: sc and snRNA-seq
Table S1. Sample characteristics and quality control.
GCT Patient Tumor scRNA-seq
ID	Patient ID	Machine	Run	Mouse ID	Clone	Genotype	Chemistry	Estimated Number of Cells (Pre-QC)	Mean Reads per cell	Median Genes per Cell	Valid Barcodes (%)	Reads Mapped to Genome (%)	Number of cells Post-QC	G34W Detected in single cell reads
P-5071__scRNAseq	P-5071	Illumina HiSeq 4000 PE100	4274	N/A	N/A	G34W	Single Cell 3' v2	2665	135639	1933	98.6	90.9	1995	No
P-6028__scRNAseq	P-6028	Illumina HiSeq 4000 PE100	4921	N/A	N/A	G34W	Single Cell 3' v2	10449	31574	965	98.5	92.2	6349	Yes
P-5874__scRNAseq	P-5874	Illumina HiSeq 4000 PE100	4921	N/A	N/A	G34W	Single Cell 3' v2	14340	23557	695	98.4	93.6	8437	Yes
P-4671__scRNAseq	P-4671	Illumina HiSeq 4000 PE100	4924	N/A	N/A	G34W	Single Cell 3' v2	16862	18599	1053	98.4	89.8	14665	Yes
Xenograft snRNA-seq
ID	Patient ID	Machine	Run	Mouse ID	Clone	Genotype	Chemistry	Estimated Number of Cells (Pre-QC)	Mean Reads per cell		Valid Barcodes (%)	Reads Mapped to Genome (%)	Number of human cells Post-QC
Im-GCT-4072__M101__2B2__G34W-unedited__snRNAseq	Im-GCT-4072	Illumina NovaSeq 6000 S4 PE100	1349	M101	2B2 (unedited)	G34W	Single Cell 3' v3	26463	18415		97.3	95.9	16350
Im-GCT-4072__M107__parental__G34W-parental__snRNAseq	Im-GCT-4072	Illumina NovaSeq 6000 S4 PE100	1349	M107	parental	G34W	Single Cell 3' v3	26869	14389		97.2	94.3	16543
Im-GCT-6176__M1__parental__G34W-parental__snRNAseq	Im-GCT-6176	Illumina NovaSeq 6000 S4 PE100	1349	M1	parental	G34W	Single Cell 3' v3	21690	22355		97.2	95.7	3845
Im-GCT-6176__M2__parental__G34W-parental__snRNAseq	Im-GCT-6176	Illumina NovaSeq 6000 S4 PE100	1349	M2	parental	G34W	Single Cell 3' v3	15241	31049		96.8	95.9	2463

## Sheet: Secretome MS
Table S1. Sample characteristics and quality control.
Sample	Patient	Clone	Genotype	Condition
WT1	Im-GCT-4072	D6	G34W repair to WT	Edited
WT2	Im-GCT-4072	D6	G34W repair to WT	Edited
WT3	Im-GCT-4072	D6	G34W repair to WT	Edited
WT4	Im-GCT-4072	D6	G34W repair to WT	Edited
MUT1	Im-GCT-4072	2B2	G34W unedited	G34W
MUT2	Im-GCT-4072	2B2	G34W unedited	G34W
MUT3	Im-GCT-4072	2B2	G34W unedited	G34W
MUT4	Im-GCT-4072	2B2	G34W unedited	G34W
