# Supplementary material for: H3.3 G34W Promotes Growth and Impedes Differentiation of Osteoblast-Like Mesenchymal Progenitors in Giant Cell Tumor of Bone
Source: Oxford University Press journal article supplement (doi:10.1158/2159-8290.cd-20-0461), 2020-09-23
Supplement: 21598290cd200461-sup-241016_2_supp_6571115_qgmhq8.xlsx [file 21598290cd200461-sup-241016_2_supp_6571115_qgmhq8.xlsx]

## Sheet: Im-GCT-4072
Table S3. Pathway enrichment analysis of significantly expressed genes in G34W lines compared to edited lines derived from Im-GCT-4072, Im-GCT-3504, and Im-GCT-6176. Pathway enrichment analysis was performed separately for all significantly expressed genes, upregulated genes, downregulated genes, upregulated genes with consistent epigenetic changes (gain of H3K36me3 and loss of H3K27me3) and down…
term_id	term_name	source	P	term_size	intersection_size	intersection_ensgs	intersection_symbols	gene_subset
GO:0007155	cell adhesion	GO:BP	1.27e-46	1440	359	ENSG00000148848, ENSG00000151651, ENSG00000148484, ENSG00000165757, ENSG00000107968, ENSG00000099250, ENSG00000165731, ENSG00000138347, ENSG00000107738, ENSG00000122861, ENSG00000108175, ENSG00000137710, ENSG00000150782, ENSG00000182985, ENSG00000160588, ENSG00000076706, ENSG00000137699, ENSG00000154127, ENSG00000149564, ENSG00000154133, ENSG00000149571, ENSG00000080854, ENSG00000064201, ENSG0000…	ADAM12, ADAM8, RSU1, KIAA1462, MAP3K8, NRP1, RET, MYPN, C10orf54, PLAU, ZMIZ1, RDX, IL18, CADM1, MPZL3, MCAM, TRIM29, UBASH3B, ESAM, ROBO4, KIRREL3, IGSF9B, TSPAN32, CD44, PKP3, LRRC4C, MDK, ROM1, FERMT3, NRXN2, DCHS1, CNTN5, NUAK1, SH2B3, PTPRO, PKP2, CNTN1, ACVRL1, ITGB7, TESPA1, ITGA7, ERBB3, PAWR, PPFIA2, NTN4, TNFSF13B, GAS6, POSTN, RGCC, PCDH17, PCDH9, SLITRK1, GPC6, CLDN10, MMP14, AJUBA, E…	any
GO:0022610	biological adhesion	GO:BP	4.37e-46	1447	359	ENSG00000148848, ENSG00000151651, ENSG00000148484, ENSG00000165757, ENSG00000107968, ENSG00000099250, ENSG00000165731, ENSG00000138347, ENSG00000107738, ENSG00000122861, ENSG00000108175, ENSG00000137710, ENSG00000150782, ENSG00000182985, ENSG00000160588, ENSG00000076706, ENSG00000137699, ENSG00000154127, ENSG00000149564, ENSG00000154133, ENSG00000149571, ENSG00000080854, ENSG00000064201, ENSG0000…	ADAM12, ADAM8, RSU1, KIAA1462, MAP3K8, NRP1, RET, MYPN, C10orf54, PLAU, ZMIZ1, RDX, IL18, CADM1, MPZL3, MCAM, TRIM29, UBASH3B, ESAM, ROBO4, KIRREL3, IGSF9B, TSPAN32, CD44, PKP3, LRRC4C, MDK, ROM1, FERMT3, NRXN2, DCHS1, CNTN5, NUAK1, SH2B3, PTPRO, PKP2, CNTN1, ACVRL1, ITGB7, TESPA1, ITGA7, ERBB3, PAWR, PPFIA2, NTN4, TNFSF13B, GAS6, POSTN, RGCC, PCDH17, PCDH9, SLITRK1, GPC6, CLDN10, MMP14, AJUBA, E…	any
GO:0032502	developmental process	GO:BP	1.56e-34	6630	1035	ENSG00000107554, ENSG00000138166, ENSG00000099204, ENSG00000107518, ENSG00000151892, ENSG00000198873, ENSG00000203805, ENSG00000066468, ENSG00000187908, ENSG00000019995, ENSG00000148848, ENSG00000170430, ENSG00000151640, ENSG00000151651, ENSG00000148803, ENSG00000165996, ENSG00000078114, ENSG00000099246, ENSG00000095739, ENSG00000165757, ENSG00000170759, ENSG00000099250, ENSG00000177283, ENSG0000…	DNMBP, DUSP5, ABLIM1, ATRNL1, GFRA1, GRK5, PPAPDC1A, FGFR2, DMBT1, ZRANB1, ADAM12, MGMT, DPYSL4, ADAM8, FUOM, PTPLA, NEBL, RAB18, BAMBI, KIAA1462, KIF5B, NRP1, FZD8, KLF6, RET, ZNF22, ARHGAP22, DKK1, MBL2, RHOBTB1, ARID5B, EGR2, HERC4, MYPN, SRGN, UNC5B, C10orf54, MCU, ZMIZ1, LDB3, PAPSS2, ACTA2, ANKRD1, TLL2, ANKRD2, MMP13, DYNC2H1, RDX, CRYAB, IL18, PTS, CADM1, TAGLN, MCAM, DKK3, SORL1, UBASH3B…	any
GO:0071944	cell periphery	GO:CC	1.79e-34	5732	928	ENSG00000197142, ENSG00000151892, ENSG00000198873, ENSG00000203805, ENSG00000066468, ENSG00000187908, ENSG00000148848, ENSG00000068383, ENSG00000151651, ENSG00000107611, ENSG00000099246, ENSG00000150054, ENSG00000095739, ENSG00000165757, ENSG00000099250, ENSG00000177283, ENSG00000165731, ENSG00000204176, ENSG00000204174, ENSG00000170324, ENSG00000198964, ENSG00000107984, ENSG00000072422, ENSG0000…	ACSL5, GFRA1, GRK5, PPAPDC1A, FGFR2, DMBT1, ADAM12, INPP5A, ADAM8, CUBN, RAB18, MPP7, BAMBI, KIAA1462, NRP1, FZD8, RET, SYT15, NPY4R, FRMPD2, SGMS1, DKK1, RHOBTB1, MYPN, TSPAN15, UNC5B, C10orf54, PLAU, TSPAN14, SLC16A12, SLC35G1, PIK3AP1, DYNC2H1, RDX, CRYAB, CADM1, MCAM, GRIK4, SORL1, CLMP, GRAMD1B, ESAM, ROBO4, KIRREL3, IGSF9B, RRAS2, LSP1, ANO5, SVIP, TSPAN32, LGR4, IFITM2, IFITM1, IFITM3, CD4…	any
GO:0048856	anatomical structure development	GO:BP	2.43e-34	6105	970	ENSG00000107554, ENSG00000138166, ENSG00000099204, ENSG00000107518, ENSG00000151892, ENSG00000203805, ENSG00000066468, ENSG00000187908, ENSG00000019995, ENSG00000148848, ENSG00000170430, ENSG00000151640, ENSG00000151651, ENSG00000148803, ENSG00000165996, ENSG00000078114, ENSG00000099246, ENSG00000095739, ENSG00000165757, ENSG00000170759, ENSG00000099250, ENSG00000177283, ENSG00000067082, ENSG0000…	DNMBP, DUSP5, ABLIM1, ATRNL1, GFRA1, PPAPDC1A, FGFR2, DMBT1, ZRANB1, ADAM12, MGMT, DPYSL4, ADAM8, FUOM, PTPLA, NEBL, RAB18, BAMBI, KIAA1462, KIF5B, NRP1, FZD8, KLF6, RET, ZNF22, ARHGAP22, DKK1, MBL2, RHOBTB1, ARID5B, EGR2, MYPN, SRGN, UNC5B, C10orf54, MCU, ZMIZ1, LDB3, PAPSS2, ACTA2, ANKRD1, TLL2, ANKRD2, MMP13, DYNC2H1, RDX, CRYAB, IL18, PTS, CADM1, TAGLN, MCAM, DKK3, SORL1, UBASH3B, CLMP, ROBO4…	any
GO:0007155	cell adhesion	GO:BP	9e-34	1440	209	ENSG00000151651, ENSG00000165757, ENSG00000099250, ENSG00000165731, ENSG00000138347, ENSG00000122861, ENSG00000108175, ENSG00000149564, ENSG00000154133, ENSG00000080854, ENSG00000064201, ENSG00000026508, ENSG00000148948, ENSG00000110492, ENSG00000149489, ENSG00000149781, ENSG00000110076, ENSG00000166341, ENSG00000111252, ENSG00000139567, ENSG00000139626, ENSG00000135426, ENSG00000135424, ENSG0000…	ADAM8, KIAA1462, NRP1, RET, MYPN, PLAU, ZMIZ1, ESAM, ROBO4, IGSF9B, TSPAN32, CD44, LRRC4C, MDK, ROM1, FERMT3, NRXN2, DCHS1, SH2B3, ACVRL1, ITGB7, TESPA1, ITGA7, PPFIA2, TNFSF13B, POSTN, RGCC, PCDH9, SLITRK1, GPC6, CLDN10, MMP14, EFS, LGALS3, ZFP36L1, FMN1, GLDN, SMAD3, ISLR, CORO1A, PYCARD, ITGAX, ITGAD, GPR56, SCARF1, LGALS9, OMG, CCL2, JUP, VMP1, SOX9, EMILIN2, CDH20, MIR27A, EMR2, CD22, TGFB1,…	upregulated
GO:0005886	plasma membrane	GO:CC	1.73e-33	5604	908	ENSG00000197142, ENSG00000151892, ENSG00000198873, ENSG00000203805, ENSG00000066468, ENSG00000187908, ENSG00000148848, ENSG00000068383, ENSG00000151651, ENSG00000107611, ENSG00000099246, ENSG00000150054, ENSG00000095739, ENSG00000165757, ENSG00000099250, ENSG00000177283, ENSG00000165731, ENSG00000204176, ENSG00000204174, ENSG00000170324, ENSG00000198964, ENSG00000107984, ENSG00000072422, ENSG0000…	ACSL5, GFRA1, GRK5, PPAPDC1A, FGFR2, DMBT1, ADAM12, INPP5A, ADAM8, CUBN, RAB18, MPP7, BAMBI, KIAA1462, NRP1, FZD8, RET, SYT15, NPY4R, FRMPD2, SGMS1, DKK1, RHOBTB1, MYPN, TSPAN15, UNC5B, C10orf54, PLAU, TSPAN14, SLC16A12, SLC35G1, PIK3AP1, DYNC2H1, RDX, CRYAB, CADM1, MCAM, GRIK4, SORL1, CLMP, GRAMD1B, ESAM, ROBO4, KIRREL3, IGSF9B, RRAS2, LSP1, ANO5, SVIP, TSPAN32, LGR4, IFITM2, IFITM1, IFITM3, CD4…	any
GO:0022610	biological adhesion	GO:BP	1.88e-33	1447	209	ENSG00000151651, ENSG00000165757, ENSG00000099250, ENSG00000165731, ENSG00000138347, ENSG00000122861, ENSG00000108175, ENSG00000149564, ENSG00000154133, ENSG00000080854, ENSG00000064201, ENSG00000026508, ENSG00000148948, ENSG00000110492, ENSG00000149489, ENSG00000149781, ENSG00000110076, ENSG00000166341, ENSG00000111252, ENSG00000139567, ENSG00000139626, ENSG00000135426, ENSG00000135424, ENSG0000…	ADAM8, KIAA1462, NRP1, RET, MYPN, PLAU, ZMIZ1, ESAM, ROBO4, IGSF9B, TSPAN32, CD44, LRRC4C, MDK, ROM1, FERMT3, NRXN2, DCHS1, SH2B3, ACVRL1, ITGB7, TESPA1, ITGA7, PPFIA2, TNFSF13B, POSTN, RGCC, PCDH9, SLITRK1, GPC6, CLDN10, MMP14, EFS, LGALS3, ZFP36L1, FMN1, GLDN, SMAD3, ISLR, CORO1A, PYCARD, ITGAX, ITGAD, GPR56, SCARF1, LGALS9, OMG, CCL2, JUP, VMP1, SOX9, EMILIN2, CDH20, MIR27A, EMR2, CD22, TGFB1,…	upregulated
GO:0048731	system development	GO:BP	1.47e-32	5020	827	ENSG00000099204, ENSG00000107518, ENSG00000151892, ENSG00000066468, ENSG00000148848, ENSG00000170430, ENSG00000151640, ENSG00000151651, ENSG00000148803, ENSG00000078114, ENSG00000099246, ENSG00000095739, ENSG00000165757, ENSG00000170759, ENSG00000099250, ENSG00000177283, ENSG00000067082, ENSG00000165731, ENSG00000165512, ENSG00000128805, ENSG00000107984, ENSG00000165471, ENSG00000150347, ENSG0000…	ABLIM1, ATRNL1, GFRA1, FGFR2, ADAM12, MGMT, DPYSL4, ADAM8, FUOM, NEBL, RAB18, BAMBI, KIAA1462, KIF5B, NRP1, FZD8, KLF6, RET, ZNF22, ARHGAP22, DKK1, MBL2, ARID5B, EGR2, MYPN, SRGN, UNC5B, C10orf54, ZMIZ1, LDB3, PAPSS2, ACTA2, ANKRD1, TLL2, ANKRD2, MMP13, DYNC2H1, CRYAB, IL18, PTS, TAGLN, MCAM, DKK3, SORL1, UBASH3B, CLMP, ROBO4, KIRREL3, FLI1, IGSF9B, SOX6, HTATIP2, LGR4, BDNF, PAX6, CD44, PKP3, LR…	any
GO:0007275	multicellular organism development	GO:BP	2.85e-31	5604	896	ENSG00000138166, ENSG00000099204, ENSG00000107518, ENSG00000151892, ENSG00000203805, ENSG00000066468, ENSG00000187908, ENSG00000148848, ENSG00000170430, ENSG00000151640, ENSG00000151651, ENSG00000148803, ENSG00000165996, ENSG00000078114, ENSG00000099246, ENSG00000095739, ENSG00000165757, ENSG00000170759, ENSG00000099250, ENSG00000177283, ENSG00000067082, ENSG00000165731, ENSG00000165512, ENSG0000…	DUSP5, ABLIM1, ATRNL1, GFRA1, PPAPDC1A, FGFR2, DMBT1, ADAM12, MGMT, DPYSL4, ADAM8, FUOM, PTPLA, NEBL, RAB18, BAMBI, KIAA1462, KIF5B, NRP1, FZD8, KLF6, RET, ZNF22, ARHGAP22, DKK1, MBL2, ARID5B, EGR2, MYPN, SRGN, UNC5B, C10orf54, ZMIZ1, LDB3, PAPSS2, ACTA2, ANKRD1, TLL2, ANKRD2, MMP13, DYNC2H1, CRYAB, IL18, PTS, CADM1, TAGLN, MCAM, DKK3, SORL1, UBASH3B, CLMP, ROBO4, KIRREL3, FLI1, IGSF9B, SOX6, HTA…	any
GO:0009653	anatomical structure morphogenesis	GO:BP	4.93e-30	2820	524	ENSG00000107554, ENSG00000138166, ENSG00000099204, ENSG00000107518, ENSG00000151892, ENSG00000066468, ENSG00000019995, ENSG00000148848, ENSG00000151640, ENSG00000151651, ENSG00000078114, ENSG00000095739, ENSG00000165757, ENSG00000170759, ENSG00000099250, ENSG00000177283, ENSG00000165731, ENSG00000165512, ENSG00000128805, ENSG00000107984, ENSG00000165471, ENSG00000072422, ENSG00000150347, ENSG0000…	DNMBP, DUSP5, ABLIM1, ATRNL1, GFRA1, FGFR2, ZRANB1, ADAM12, DPYSL4, ADAM8, NEBL, BAMBI, KIAA1462, KIF5B, NRP1, FZD8, RET, ZNF22, ARHGAP22, DKK1, MBL2, RHOBTB1, ARID5B, EGR2, MYPN, UNC5B, MCU, ZMIZ1, LDB3, ACTA2, ANKRD1, MMP13, DYNC2H1, RDX, CRYAB, IL18, MCAM, DKK3, ROBO4, KIRREL3, FLI1, SOX6, HTATIP2, LGR4, BDNF, PAX6, CD44, LRRC4C, MDK, LRP4, ROM1, FERMT3, EHD1, LTBP3, CST6, DCHS1, LRP5, FOLR1, …	any
GO:0031226	intrinsic component of plasma membrane	GO:CC	7.02e-30	1700	359	ENSG00000203805, ENSG00000066468, ENSG00000151651, ENSG00000099250, ENSG00000165731, ENSG00000204174, ENSG00000198964, ENSG00000099282, ENSG00000108219, ENSG00000152779, ENSG00000149403, ENSG00000137642, ENSG00000064201, ENSG00000205213, ENSG00000026508, ENSG00000148948, ENSG00000085117, ENSG00000019505, ENSG00000011347, ENSG00000149489, ENSG00000174871, ENSG00000174669, ENSG00000110195, ENSG0000…	PPAPDC1A, FGFR2, ADAM8, NRP1, RET, NPY4R, SGMS1, TSPAN15, TSPAN14, SLC16A12, GRIK4, SORL1, TSPAN32, LGR4, CD44, LRRC4C, CD82, SYT13, SYT7, ROM1, CNIH2, SLC29A2, FOLR1, CNTN5, KLRC2, KLRC1, HVCN1, GPRC5A, PTPRO, LRMP, TSPAN11, CNTN1, SLC38A1, SCN8A, ACVRL1, ITGB7, ITGA7, ERBB3, SLC26A10, SCNN1A, TSPAN8, C3AR1, ATP2B1, FLT1, DCLK1, HTR2A, LPAR6, PCDH17, PCDH9, EDNRB, SLITRK1, SLITRK6, GPC6, GPR18, …	any
GO:0005887	integral component of plasma membrane	GO:CC	5.08e-28	1624	342	ENSG00000203805, ENSG00000066468, ENSG00000151651, ENSG00000099250, ENSG00000165731, ENSG00000204174, ENSG00000198964, ENSG00000099282, ENSG00000108219, ENSG00000152779, ENSG00000149403, ENSG00000137642, ENSG00000064201, ENSG00000205213, ENSG00000026508, ENSG00000148948, ENSG00000085117, ENSG00000019505, ENSG00000011347, ENSG00000149489, ENSG00000174871, ENSG00000174669, ENSG00000205809, ENSG0000…	PPAPDC1A, FGFR2, ADAM8, NRP1, RET, NPY4R, SGMS1, TSPAN15, TSPAN14, SLC16A12, GRIK4, SORL1, TSPAN32, LGR4, CD44, LRRC4C, CD82, SYT13, SYT7, ROM1, CNIH2, SLC29A2, KLRC2, KLRC1, HVCN1, GPRC5A, PTPRO, LRMP, TSPAN11, SLC38A1, SCN8A, ACVRL1, ITGB7, ITGA7, ERBB3, SLC26A10, SCNN1A, TSPAN8, C3AR1, ATP2B1, FLT1, DCLK1, HTR2A, LPAR6, PCDH17, PCDH9, EDNRB, SLITRK1, SLITRK6, GPR18, SLC7A7, MMP14, SLC7A8, GPR6…	any
GO:0098609	cell-cell adhesion	GO:BP	4.42e-27	866	218	ENSG00000151651, ENSG00000107968, ENSG00000165731, ENSG00000138347, ENSG00000107738, ENSG00000108175, ENSG00000137710, ENSG00000150782, ENSG00000182985, ENSG00000137699, ENSG00000154127, ENSG00000149564, ENSG00000154133, ENSG00000149571, ENSG00000080854, ENSG00000064201, ENSG00000026508, ENSG00000184363, ENSG00000148948, ENSG00000110492, ENSG00000149781, ENSG00000110076, ENSG00000166341, ENSG0000…	ADAM8, MAP3K8, RET, MYPN, C10orf54, ZMIZ1, RDX, IL18, CADM1, TRIM29, UBASH3B, ESAM, ROBO4, KIRREL3, IGSF9B, TSPAN32, CD44, PKP3, LRRC4C, MDK, FERMT3, NRXN2, DCHS1, SH2B3, PKP2, ITGB7, TESPA1, ITGA7, PAWR, TNFSF13B, RGCC, PCDH17, PCDH9, SLITRK1, GPC6, CLDN10, AJUBA, STXBP6, BMP4, LGALS3, ZFP36L1, TJP1, GLDN, TMOD3, NPTN, CORO1A, PYCARD, ITGAX, ITGAD, ABAT, LGALS9, CCL2, JUP, DUSP3, VMP1, SOX9, SDK…	any
GO:0032501	multicellular organismal process	GO:BP	7.92e-27	7873	1152	ENSG00000099194, ENSG00000138166, ENSG00000099204, ENSG00000107518, ENSG00000151892, ENSG00000203805, ENSG00000066468, ENSG00000187908, ENSG00000148848, ENSG00000170430, ENSG00000151640, ENSG00000151651, ENSG00000148803, ENSG00000107611, ENSG00000165996, ENSG00000078114, ENSG00000099246, ENSG00000095739, ENSG00000165757, ENSG00000170759, ENSG00000099250, ENSG00000177283, ENSG00000067082, ENSG0000…	SCD, DUSP5, ABLIM1, ATRNL1, GFRA1, PPAPDC1A, FGFR2, DMBT1, ADAM12, MGMT, DPYSL4, ADAM8, FUOM, CUBN, PTPLA, NEBL, RAB18, BAMBI, KIAA1462, KIF5B, NRP1, FZD8, KLF6, RET, ZNF22, ARHGAP22, DKK1, MBL2, ARID5B, EGR2, HERC4, MYPN, SRGN, UNC5B, C10orf54, PLAU, ZMIZ1, LDB3, PAPSS2, RNLS, ACTA2, ANKRD1, TLL2, ANKRD2, MMP13, DYNC2H1, AMPD3, CRYAB, IL18, PTS, CADM1, TAGLN, MPZL3, MCAM, DKK3, SORL1, UBASH3B, C…	any
GO:0007156	homophilic cell adhesion via plasma membrane adhesion molecules	GO:BP	2.42e-23	167	74	ENSG00000165731, ENSG00000138347, ENSG00000182985, ENSG00000149564, ENSG00000154133, ENSG00000149571, ENSG00000080854, ENSG00000166341, ENSG00000118946, ENSG00000184226, ENSG00000156642, ENSG00000069188, ENSG00000170558, ENSG00000046604, ENSG00000101542, ENSG00000173482, ENSG00000079385, ENSG00000073008, ENSG00000143126, ENSG00000181754, ENSG00000162614, ENSG00000075275, ENSG00000144619, ENSG0000…	RET, MYPN, CADM1, ESAM, ROBO4, KIRREL3, IGSF9B, DCHS1, PCDH17, PCDH9, NPTN, SDK2, CDH2, DSG2, CDH20, PTPRM, CEACAM1, PVR, CELSR2, AMIGO1, NEXN, CELSR1, CNTN4, CELSR3, ROBO2, FAT4, PCDH18, DCHS2, PCDH7, PCDHA1, PCDHA3, PCDHA4, PCDHA5, PCDHA7, PCDHA8, PCDHA9, PCDHA10, PCDHA11, PCDHA12, PCDHA13, PCDHAC1, PCDHB3, PCDHGA1, PCDHGA2, PCDHGA3, PCDHGB1, PCDHGA4, PCDHGB2, PCDHGA5, PCDHGB3, PCDHGA6, PCDHGA7…	any
GO:0098742	cell-cell adhesion via plasma-membrane adhesion molecules	GO:BP	3.28e-23	275	99	ENSG00000165731, ENSG00000138347, ENSG00000182985, ENSG00000149564, ENSG00000154133, ENSG00000149571, ENSG00000080854, ENSG00000148948, ENSG00000166341, ENSG00000118946, ENSG00000184226, ENSG00000178235, ENSG00000183098, ENSG00000134873, ENSG00000129474, ENSG00000156642, ENSG00000069188, ENSG00000170558, ENSG00000046604, ENSG00000101542, ENSG00000173482, ENSG00000079385, ENSG00000073008, ENSG0000…	RET, MYPN, CADM1, ESAM, ROBO4, KIRREL3, IGSF9B, LRRC4C, DCHS1, PCDH17, PCDH9, SLITRK1, GPC6, CLDN10, AJUBA, NPTN, SDK2, CDH2, DSG2, CDH20, PTPRM, CEACAM1, PVR, LRRC4B, VCAM1, NTNG1, CELSR2, AMIGO1, MPZ, KIFAP3, TGFB2, NEXN, MMP24, BMP2, CELSR1, NRXN1, CLDN1, CNTN4, CELSR3, ROBO2, FAT4, PCDH18, DCHS2, CLDN22, PCDH7, PCDHA1, PCDHA3, PCDHA4, PCDHA5, PCDHA7, PCDHA8, PCDHA9, PCDHA10, PCDHA11, PCDHA12,…	any
GO:0071944	cell periphery	GO:CC	5.99e-23	5732	491	ENSG00000197142, ENSG00000151892, ENSG00000187908, ENSG00000151651, ENSG00000107611, ENSG00000165757, ENSG00000099250, ENSG00000177283, ENSG00000165731, ENSG00000170324, ENSG00000107984, ENSG00000138347, ENSG00000107731, ENSG00000122861, ENSG00000187240, ENSG00000166250, ENSG00000023171, ENSG00000149564, ENSG00000154133, ENSG00000080854, ENSG00000130592, ENSG00000198168, ENSG00000064201, ENSG0000…	ACSL5, GFRA1, DMBT1, ADAM8, CUBN, KIAA1462, NRP1, FZD8, RET, FRMPD2, DKK1, MYPN, UNC5B, PLAU, DYNC2H1, CLMP, GRAMD1B, ESAM, ROBO4, IGSF9B, LSP1, SVIP, TSPAN32, IFITM2, IFITM1, IFITM3, CD44, LRRC4C, SIGIRR, CD82, SYT13, LRP4, AC104389.28, ZP1, SYT7, AHNAK, ROM1, NRXN2, FOSL1, CNIH2, RIN1, DCHS1, KLRC2, KLRC1, HVCN1, SH2B3, TAS2R30, NOS1, GPRC5A, RIMBP2, EMP1, CACNA2D4, LRMP, TSPAN11, LRRK2, RAPGEF…	upregulated
GO:0005886	plasma membrane	GO:CC	1.03e-22	5604	482	ENSG00000197142, ENSG00000151892, ENSG00000187908, ENSG00000151651, ENSG00000107611, ENSG00000165757, ENSG00000099250, ENSG00000177283, ENSG00000165731, ENSG00000170324, ENSG00000107984, ENSG00000138347, ENSG00000107731, ENSG00000122861, ENSG00000187240, ENSG00000166250, ENSG00000023171, ENSG00000149564, ENSG00000154133, ENSG00000080854, ENSG00000130592, ENSG00000198168, ENSG00000064201, ENSG0000…	ACSL5, GFRA1, DMBT1, ADAM8, CUBN, KIAA1462, NRP1, FZD8, RET, FRMPD2, DKK1, MYPN, UNC5B, PLAU, DYNC2H1, CLMP, GRAMD1B, ESAM, ROBO4, IGSF9B, LSP1, SVIP, TSPAN32, IFITM2, IFITM1, IFITM3, CD44, LRRC4C, SIGIRR, CD82, SYT13, LRP4, AC104389.28, ZP1, SYT7, AHNAK, ROM1, NRXN2, FOSL1, CNIH2, RIN1, DCHS1, KLRC2, KLRC1, HVCN1, SH2B3, TAS2R30, NOS1, GPRC5A, RIMBP2, EMP1, CACNA2D4, LRMP, TSPAN11, LRRK2, RAPGEF…	upregulated
GO:0048869	cellular developmental process	GO:BP	3.28e-22	4531	723	ENSG00000107554, ENSG00000151892, ENSG00000198873, ENSG00000066468, ENSG00000187908, ENSG00000019995, ENSG00000148848, ENSG00000170430, ENSG00000151640, ENSG00000151651, ENSG00000148803, ENSG00000078114, ENSG00000095739, ENSG00000170759, ENSG00000099250, ENSG00000177283, ENSG00000067082, ENSG00000165731, ENSG00000128805, ENSG00000107984, ENSG00000165471, ENSG00000072422, ENSG00000150347, ENSG0000…	DNMBP, GFRA1, GRK5, FGFR2, DMBT1, ZRANB1, ADAM12, MGMT, DPYSL4, ADAM8, FUOM, NEBL, BAMBI, KIF5B, NRP1, FZD8, KLF6, RET, ARHGAP22, DKK1, MBL2, RHOBTB1, ARID5B, EGR2, HERC4, MYPN, UNC5B, C10orf54, ZMIZ1, LDB3, ACTA2, ANKRD1, TLL2, ANKRD2, DYNC2H1, RDX, IL18, CADM1, TAGLN, SORL1, UBASH3B, ROBO4, KIRREL3, FLI1, RRAS2, SOX6, HTATIP2, LGR4, BDNF, IFITM1, PAX6, CD44, PKP3, LRRC4C, MDK, LRP4, OR51E2, TRI…	any
GO:0031226	intrinsic component of plasma membrane	GO:CC	4.05e-21	1700	201	ENSG00000151651, ENSG00000099250, ENSG00000165731, ENSG00000064201, ENSG00000026508, ENSG00000148948, ENSG00000085117, ENSG00000019505, ENSG00000011347, ENSG00000149489, ENSG00000174871, ENSG00000205809, ENSG00000134545, ENSG00000122986, ENSG00000013588, ENSG00000118308, ENSG00000110900, ENSG00000139567, ENSG00000139626, ENSG00000135424, ENSG00000135502, ENSG00000111319, ENSG00000127324, ENSG0000…	ADAM8, NRP1, RET, TSPAN32, CD44, LRRC4C, CD82, SYT13, SYT7, ROM1, CNIH2, KLRC2, KLRC1, HVCN1, GPRC5A, LRMP, TSPAN11, ACVRL1, ITGB7, ITGA7, SLC26A10, SCNN1A, TSPAN8, C3AR1, ATP2B1, LPAR6, PCDH9, EDNRB, SLITRK1, SLITRK6, GPC6, GPR18, MMP14, SLC7A8, GPR68, BDKRB2, SLC12A6, SEMA6D, NOX5, CHRNA3, SEMA4B, SSTR5, RAB26, PRRT2, ITGAX, ITGAD, GPR56, MC1R, ADORA2B, EVI2B, TRPV3, TRPV1, ABCC3, MMD, ASGR1, G…	upregulated
GO:0048468	cell development	GO:BP	8.09e-21	2215	407	ENSG00000151892, ENSG00000066468, ENSG00000151640, ENSG00000148803, ENSG00000078114, ENSG00000170759, ENSG00000099250, ENSG00000165731, ENSG00000107984, ENSG00000165471, ENSG00000150347, ENSG00000122877, ENSG00000138347, ENSG00000107731, ENSG00000122367, ENSG00000107796, ENSG00000148677, ENSG00000137710, ENSG00000137642, ENSG00000154133, ENSG00000149571, ENSG00000151702, ENSG00000110693, ENSG0000…	GFRA1, FGFR2, DPYSL4, FUOM, NEBL, KIF5B, NRP1, RET, DKK1, MBL2, ARID5B, EGR2, MYPN, UNC5B, LDB3, ACTA2, ANKRD1, RDX, SORL1, ROBO4, KIRREL3, FLI1, SOX6, BDNF, PAX6, LRRC4C, MDK, LRP4, MYRF, FERMT3, EHD1, PPP2R5B, LRP5, FOLR1, MTMR2, SH2B3, NOS1, SRRM4, CCDC64, PTPRO, BHLHE41, LRRK2, CNTN1, RAPGEF3, ITGB7, STAC3, KIF5A, AVIL, DPY19L2, GRIP1, PTPRQ, PPFIA2, NTN4, MYO16, ATP8A2, WASF3, FRY, DCLK1, PO…	any
GO:0005887	integral component of plasma membrane	GO:CC	8.51e-21	1624	194	ENSG00000151651, ENSG00000099250, ENSG00000165731, ENSG00000064201, ENSG00000026508, ENSG00000148948, ENSG00000085117, ENSG00000019505, ENSG00000011347, ENSG00000149489, ENSG00000174871, ENSG00000205809, ENSG00000134545, ENSG00000122986, ENSG00000013588, ENSG00000118308, ENSG00000110900, ENSG00000139567, ENSG00000139626, ENSG00000135424, ENSG00000135502, ENSG00000111319, ENSG00000127324, ENSG0000…	ADAM8, NRP1, RET, TSPAN32, CD44, LRRC4C, CD82, SYT13, SYT7, ROM1, CNIH2, KLRC2, KLRC1, HVCN1, GPRC5A, LRMP, TSPAN11, ACVRL1, ITGB7, ITGA7, SLC26A10, SCNN1A, TSPAN8, C3AR1, ATP2B1, LPAR6, PCDH9, EDNRB, SLITRK1, SLITRK6, GPR18, MMP14, SLC7A8, GPR68, BDKRB2, SLC12A6, SEMA6D, NOX5, CHRNA3, SEMA4B, SSTR5, PRRT2, ITGAX, ITGAD, GPR56, MC1R, ADORA2B, EVI2B, TRPV3, TRPV1, ABCC3, MMD, ASGR1, GRIN2C, TMC6, …	upregulated
GO:0007399	nervous system development	GO:BP	1.14e-20	2432	437	ENSG00000151892, ENSG00000066468, ENSG00000151640, ENSG00000148803, ENSG00000099246, ENSG00000170759, ENSG00000099250, ENSG00000177283, ENSG00000165731, ENSG00000107984, ENSG00000122877, ENSG00000138347, ENSG00000107731, ENSG00000148677, ENSG00000187240, ENSG00000150787, ENSG00000137642, ENSG00000154133, ENSG00000149571, ENSG00000080854, ENSG00000110693, ENSG00000176697, ENSG00000007372, ENSG0000…	GFRA1, FGFR2, DPYSL4, FUOM, RAB18, KIF5B, NRP1, FZD8, RET, DKK1, EGR2, MYPN, UNC5B, ANKRD1, DYNC2H1, PTS, SORL1, ROBO4, KIRREL3, IGSF9B, SOX6, BDNF, PAX6, LRRC4C, MDK, LRP4, MYRF, ROM1, NRXN2, EHD1, PPP2R5B, TPP1, DCHS1, FOLR1, MTMR2, CNTN5, NOS1, SRRM4, CCDC64, MSI1, PTPRO, BHLHE41, ABCD2, LRRK2, CNTN1, SCN8A, ERBB3, NAB2, KIF5A, AVIL, GRIP1, PTPRQ, PPFIA2, ATP2B1, NTN4, MYO16, GAS6, FGF9, ATP8A…	any
GO:0009888	tissue development	GO:BP	3.41e-20	2118	391	ENSG00000138166, ENSG00000107518, ENSG00000066468, ENSG00000187908, ENSG00000170430, ENSG00000078114, ENSG00000095739, ENSG00000099250, ENSG00000165731, ENSG00000107984, ENSG00000165471, ENSG00000150347, ENSG00000122877, ENSG00000122862, ENSG00000107796, ENSG00000148677, ENSG00000095587, ENSG00000165887, ENSG00000137745, ENSG00000137710, ENSG00000149591, ENSG00000137642, ENSG00000110693, ENSG0000…	DUSP5, ATRNL1, FGFR2, DMBT1, MGMT, NEBL, BAMBI, NRP1, RET, DKK1, MBL2, ARID5B, EGR2, SRGN, ACTA2, ANKRD1, TLL2, ANKRD2, MMP13, RDX, TAGLN, SORL1, SOX6, LGR4, BDNF, PAX6, CD44, PKP3, MDK, LRP4, RARRES3, LTBP3, CST6, TPP1, DCHS1, LRP5, FOLR1, DGAT2, TXNRD1, STX2, EMP1, MGP, PTPRO, PKP2, RAPGEF3, ACVRL1, KRT80, KRT86, KRT81, KRT75, HOXC13, ITGA7, ERBB3, MYL6B, MYL6, NAB2, STAC3, HMGA2, PTPRQ, ATP2B1…	any
GO:0032502	developmental process	GO:BP	3.63e-20	6630	539	ENSG00000107554, ENSG00000138166, ENSG00000151892, ENSG00000187908, ENSG00000151651, ENSG00000148803, ENSG00000165757, ENSG00000099250, ENSG00000177283, ENSG00000067082, ENSG00000165731, ENSG00000165512, ENSG00000128805, ENSG00000107984, ENSG00000165471, ENSG00000150347, ENSG00000122877, ENSG00000148634, ENSG00000138347, ENSG00000107731, ENSG00000108175, ENSG00000137745, ENSG00000187240, ENSG0000…	DNMBP, DUSP5, GFRA1, DMBT1, ADAM8, FUOM, KIAA1462, NRP1, FZD8, KLF6, RET, ZNF22, ARHGAP22, DKK1, MBL2, ARID5B, EGR2, HERC4, MYPN, UNC5B, ZMIZ1, MMP13, DYNC2H1, DKK3, CLMP, ROBO4, FLI1, IGSF9B, IFITM1, CD44, LRRC4C, MDK, LRP4, SERPING1, MYRF, ROM1, LGALS12, RARRES3, FERMT3, NRXN2, BATF2, LTBP3, FOSL1, TPP1, DCHS1, DGAT2, SH2B3, OAS2, NOS1, EMP1, BHLHE41, LRRK2, RAPGEF3, C1QL4, FMNL3, ACVRL1, KRT75…	upregulated
GO:0031224	intrinsic component of membrane	GO:CC	6.11e-19	5842	874	ENSG00000099194, ENSG00000108018, ENSG00000197142, ENSG00000107518, ENSG00000151892, ENSG00000203805, ENSG00000066468, ENSG00000182022, ENSG00000148848, ENSG00000151651, ENSG00000165996, ENSG00000148483, ENSG00000204740, ENSG00000120594, ENSG00000095739, ENSG00000099250, ENSG00000177283, ENSG00000165731, ENSG00000204176, ENSG00000204174, ENSG00000198964, ENSG00000099282, ENSG00000171224, ENSG0000…	SCD, SORCS1, ACSL5, ATRNL1, GFRA1, PPAPDC1A, FGFR2, CHST15, ADAM12, ADAM8, PTPLA, TMEM236, MALRD1, PLXDC2, BAMBI, NRP1, FZD8, RET, SYT15, NPY4R, SGMS1, TSPAN15, C10orf35, UNC5B, C10orf54, CHST3, MCU, TSPAN14, SLC16A12, SLC35G1, HOGA1, MRVI1, C11orf87, LAYN, CADM1, GALNT18, PCSK7, MPZL3, MCAM, GRIK4, SC5D, SORL1, CLMP, GRAMD1B, ESAM, ROBO4, SLC37A2, KIRREL3, TMEM45B, IGSF9B, TMEM86A, ANO5, SVIP, T…	any
GO:0048856	anatomical structure development	GO:BP	6.76e-19	6105	502	ENSG00000107554, ENSG00000138166, ENSG00000151892, ENSG00000187908, ENSG00000151651, ENSG00000148803, ENSG00000165757, ENSG00000099250, ENSG00000177283, ENSG00000067082, ENSG00000165731, ENSG00000165512, ENSG00000128805, ENSG00000107984, ENSG00000165471, ENSG00000150347, ENSG00000122877, ENSG00000138347, ENSG00000107731, ENSG00000108175, ENSG00000137745, ENSG00000187240, ENSG00000050165, ENSG0000…	DNMBP, DUSP5, GFRA1, DMBT1, ADAM8, FUOM, KIAA1462, NRP1, FZD8, KLF6, RET, ZNF22, ARHGAP22, DKK1, MBL2, ARID5B, EGR2, MYPN, UNC5B, ZMIZ1, MMP13, DYNC2H1, DKK3, CLMP, ROBO4, FLI1, IGSF9B, CD44, LRRC4C, MDK, LRP4, MYRF, ROM1, RARRES3, FERMT3, NRXN2, BATF2, LTBP3, FOSL1, TPP1, DCHS1, DGAT2, SH2B3, OAS2, NOS1, EMP1, BHLHE41, LRRK2, RAPGEF3, FMNL3, ACVRL1, KRT75, ITGB7, TESPA1, ITGA7, NAB2, STAC3, KIF5…	upregulated
GO:0032879	regulation of localization	GO:BP	7.43e-19	2942	500	ENSG00000203805, ENSG00000151651, ENSG00000165757, ENSG00000170759, ENSG00000099250, ENSG00000165731, ENSG00000204176, ENSG00000107984, ENSG00000165471, ENSG00000072422, ENSG00000122862, ENSG00000107738, ENSG00000156026, ENSG00000122861, ENSG00000148677, ENSG00000137710, ENSG00000109846, ENSG00000182985, ENSG00000076706, ENSG00000137699, ENSG00000137642, ENSG00000154127, ENSG00000154133, ENSG0000…	PPAPDC1A, ADAM8, KIAA1462, KIF5B, NRP1, RET, SYT15, DKK1, MBL2, RHOBTB1, SRGN, C10orf54, MCU, PLAU, ANKRD1, RDX, CRYAB, CADM1, MCAM, TRIM29, SORL1, UBASH3B, ROBO4, RRAS2, SVIP, LGR4, BDNF, IFITM1, PAX6, PRR5L, SYT13, MDK, LRP4, OR51E2, TRIM6, SYT7, AHNAK, FERMT3, EHD1, FAM89B, CNIH2, LRP5, MTMR2, CRY1, HVCN1, OAS2, NOS1, PTPRO, CACNA2D4, C12orf39, DENND5B, PKP2, LRRK2, CNTN1, RAPGEF3, SCN8A, ACVR…	any
GO:0006928	movement of cell or subcellular component	GO:BP	7.77e-19	2252	405	ENSG00000151892, ENSG00000019995, ENSG00000151640, ENSG00000151651, ENSG00000095739, ENSG00000165757, ENSG00000170759, ENSG00000099250, ENSG00000165731, ENSG00000072422, ENSG00000150347, ENSG00000122877, ENSG00000138347, ENSG00000107731, ENSG00000107738, ENSG00000156026, ENSG00000122861, ENSG00000187240, ENSG00000137710, ENSG00000076706, ENSG00000137642, ENSG00000149564, ENSG00000154133, ENSG0000…	GFRA1, ZRANB1, DPYSL4, ADAM8, BAMBI, KIAA1462, KIF5B, NRP1, RET, RHOBTB1, ARID5B, EGR2, MYPN, UNC5B, C10orf54, MCU, PLAU, DYNC2H1, RDX, MCAM, SORL1, ESAM, ROBO4, KIRREL3, RRAS2, BDNF, IFITM1, PAX6, CD44, PRR5L, MDK, OR51E2, FERMT3, DNHD1, FAM89B, CNIH2, DCHS1, LRP5, FOLR1, CCDC64, WDR66, PTPRO, TSPAN11, PKP2, KIF21A, LRRK2, FMNL3, ACVRL1, ITGB7, ERBB3, MYL6B, MYL6, KIF5A, PTPRR, C3AR1, DCN, BTG1,…	any
GO:0098609	cell-cell adhesion	GO:BP	8.87e-19	866	126	ENSG00000151651, ENSG00000165731, ENSG00000138347, ENSG00000108175, ENSG00000149564, ENSG00000154133, ENSG00000080854, ENSG00000064201, ENSG00000026508, ENSG00000148948, ENSG00000110492, ENSG00000149781, ENSG00000110076, ENSG00000166341, ENSG00000111252, ENSG00000139626, ENSG00000135426, ENSG00000135424, ENSG00000102524, ENSG00000102760, ENSG00000184226, ENSG00000178235, ENSG00000183098, ENSG0000…	ADAM8, RET, MYPN, ZMIZ1, ESAM, ROBO4, IGSF9B, TSPAN32, CD44, LRRC4C, MDK, FERMT3, NRXN2, DCHS1, SH2B3, ITGB7, TESPA1, ITGA7, TNFSF13B, RGCC, PCDH9, SLITRK1, GPC6, CLDN10, LGALS3, ZFP36L1, GLDN, CORO1A, PYCARD, ITGAX, ITGAD, LGALS9, CCL2, JUP, VMP1, SOX9, CDH20, MIR27A, TGFB1, CEACAM1, CD33, TTYH1, VCAM1, NTNG1, PTPN22, SHC1, MPZ, KIFAP3, TNFSF4, PTPRC, PTPRU, COL8A2, IL23R, BCL10, CYR61, FOXA2, A…	upregulated
GO:0051239	regulation of multicellular organismal process	GO:BP	9.35e-19	3356	555	ENSG00000099194, ENSG00000066468, ENSG00000148848, ENSG00000151651, ENSG00000148803, ENSG00000095739, ENSG00000165757, ENSG00000099250, ENSG00000165731, ENSG00000107984, ENSG00000122877, ENSG00000122862, ENSG00000107738, ENSG00000122861, ENSG00000108175, ENSG00000184719, ENSG00000148677, ENSG00000095587, ENSG00000165887, ENSG00000150782, ENSG00000182985, ENSG00000137642, ENSG00000154127, ENSG0000…	SCD, FGFR2, ADAM12, ADAM8, FUOM, BAMBI, KIAA1462, NRP1, RET, DKK1, EGR2, SRGN, C10orf54, PLAU, ZMIZ1, RNLS, ANKRD1, TLL2, ANKRD2, IL18, CADM1, SORL1, UBASH3B, IGSF9B, SOX6, HTATIP2, LGR4, BDNF, IFITM1, PAX6, LRRC4C, SIGIRR, MDK, LRP4, OR51E2, TRIM6, SERPING1, DTX4, SYT7, MYRF, RARRES3, EHD1, PPP2R5B, LTBP3, CNIH2, LRP5, MTMR2, CRY1, SH2B3, OAS2, NOS1, MGP, PTPRO, CACNA2D4, C12orf39, BHLHE41, PKP2…	any
GO:0009653	anatomical structure morphogenesis	GO:BP	1.11e-18	2820	282	ENSG00000107554, ENSG00000138166, ENSG00000151892, ENSG00000151651, ENSG00000165757, ENSG00000099250, ENSG00000177283, ENSG00000165731, ENSG00000165512, ENSG00000128805, ENSG00000107984, ENSG00000165471, ENSG00000150347, ENSG00000122877, ENSG00000138347, ENSG00000107731, ENSG00000108175, ENSG00000137745, ENSG00000187240, ENSG00000050165, ENSG00000154133, ENSG00000151702, ENSG00000026508, ENSG0000…	DNMBP, DUSP5, GFRA1, ADAM8, KIAA1462, NRP1, FZD8, RET, ZNF22, ARHGAP22, DKK1, MBL2, ARID5B, EGR2, MYPN, UNC5B, ZMIZ1, MMP13, DYNC2H1, DKK3, ROBO4, FLI1, CD44, LRRC4C, MDK, LRP4, ROM1, FERMT3, LTBP3, DCHS1, NOS1, LRRK2, RAPGEF3, FMNL3, ACVRL1, ITGB7, ITGA7, NAB2, KIF5A, LRIG3, HMGA2, PPFIA2, C3AR1, DCN, BTG1, TNFSF13B, POSTN, RGCC, SLITRK1, SLITRK6, GPC6, CRIP1, MMP14, ZFP36L1, RPS6KA5, SYNE3, FMN…	upregulated
GO:0032989	cellular component morphogenesis	GO:BP	1.12e-18	1177	247	ENSG00000107554, ENSG00000151892, ENSG00000066468, ENSG00000019995, ENSG00000151640, ENSG00000151651, ENSG00000078114, ENSG00000095739, ENSG00000170759, ENSG00000099250, ENSG00000165731, ENSG00000107984, ENSG00000165471, ENSG00000072422, ENSG00000122877, ENSG00000138347, ENSG00000107731, ENSG00000122367, ENSG00000148677, ENSG00000137710, ENSG00000154133, ENSG00000149571, ENSG00000110693, ENSG0000…	DNMBP, GFRA1, FGFR2, ZRANB1, DPYSL4, ADAM8, NEBL, BAMBI, KIF5B, NRP1, RET, DKK1, MBL2, RHOBTB1, EGR2, MYPN, UNC5B, LDB3, ANKRD1, RDX, ROBO4, KIRREL3, SOX6, BDNF, PAX6, CD44, LRRC4C, MDK, LRP4, FERMT3, MTMR2, PTPRO, FGD4, LRRK2, FMNL3, ITGB7, ITGA7, KIF5A, GRIP1, PTPRQ, PPFIA2, NTN4, MYO16, ATP8A2, WASF3, FRY, DCLK1, POSTN, SLITRK1, SLITRK6, FARP1, CFL2, FERMT2, SPTB, MPP5, ACTN1, RPS6KA5, SYNE3, …	any
GO:0050793	regulation of developmental process	GO:BP	1.23e-18	2779	477	ENSG00000107554, ENSG00000066468, ENSG00000019995, ENSG00000148848, ENSG00000151651, ENSG00000148803, ENSG00000095739, ENSG00000165757, ENSG00000099250, ENSG00000165731, ENSG00000107984, ENSG00000072422, ENSG00000122862, ENSG00000107738, ENSG00000156026, ENSG00000108175, ENSG00000148677, ENSG00000095587, ENSG00000165887, ENSG00000137710, ENSG00000150782, ENSG00000137642, ENSG00000154127, ENSG0000…	DNMBP, FGFR2, ZRANB1, ADAM12, ADAM8, FUOM, BAMBI, KIAA1462, NRP1, RET, DKK1, RHOBTB1, SRGN, C10orf54, MCU, ZMIZ1, ANKRD1, TLL2, ANKRD2, RDX, IL18, SORL1, UBASH3B, SOX6, HTATIP2, LGR4, BDNF, IFITM1, PAX6, CD44, LRRC4C, MDK, LRP4, TRIM6, MYRF, LGALS12, RARRES3, EHD1, PPP2R5B, LTBP3, LRP5, MTMR2, NUAK1, OAS2, NOS1, MGP, PTPRO, BHLHE41, FGD4, PKP2, LRRK2, CNTN1, RAPGEF3, C1QL4, FMNL3, ACVRL1, TESPA1,…	any
GO:0030154	cell differentiation	GO:BP	1.99e-18	4335	681	ENSG00000151892, ENSG00000198873, ENSG00000066468, ENSG00000187908, ENSG00000148848, ENSG00000170430, ENSG00000151640, ENSG00000151651, ENSG00000148803, ENSG00000078114, ENSG00000095739, ENSG00000170759, ENSG00000099250, ENSG00000177283, ENSG00000067082, ENSG00000165731, ENSG00000128805, ENSG00000107984, ENSG00000165471, ENSG00000150347, ENSG00000122877, ENSG00000148634, ENSG00000138347, ENSG0000…	GFRA1, GRK5, FGFR2, DMBT1, ADAM12, MGMT, DPYSL4, ADAM8, FUOM, NEBL, BAMBI, KIF5B, NRP1, FZD8, KLF6, RET, ARHGAP22, DKK1, MBL2, ARID5B, EGR2, HERC4, MYPN, UNC5B, C10orf54, ZMIZ1, LDB3, ACTA2, ANKRD1, TLL2, ANKRD2, DYNC2H1, RDX, IL18, CADM1, TAGLN, SORL1, UBASH3B, ROBO4, KIRREL3, FLI1, RRAS2, SOX6, HTATIP2, LGR4, BDNF, IFITM1, PAX6, PKP3, LRRC4C, MDK, LRP4, OR51E2, TRIM6, MYRF, ROM1, LGALS12, RARRE…	any
GO:0005509	calcium ion binding	GO:MF	4.87e-18	717	171	ENSG00000170430, ENSG00000151651, ENSG00000107611, ENSG00000165731, ENSG00000204176, ENSG00000183346, ENSG00000095587, ENSG00000137745, ENSG00000135378, ENSG00000019505, ENSG00000134569, ENSG00000011347, ENSG00000068831, ENSG00000110047, ENSG00000168056, ENSG00000166341, ENSG00000111341, ENSG00000196465, ENSG00000092841, ENSG00000182326, ENSG00000159403, ENSG00000183087, ENSG00000136167, ENSG0000…	MGMT, ADAM8, CUBN, RET, SYT15, C10orf107, TLL2, MMP13, PRRG4, SYT13, LRP4, SYT7, RASGRP2, EHD1, LTBP3, DCHS1, MGP, MYL6B, MYL6, C1S, C1R, GAS6, LCP1, PCDH17, PCDH9, GCH1, ACTN1, SMOC1, LTBP2, THBS1, PLCB2, NOX5, RCN2, MEX3B, ACAN, MCTP2, NKD1, PITPNM3, CDH2, DSG2, MYL12A, MYL12B, CCBE1, CDH20, EMR2, DLL3, RCN3, TTYH1, CAPS, CELSR2, S100A4, S100A2, S100A16, THBS3, BGLAP, PADI1, PADI3, TNNT2, SYT2,…	any
GO:0022008	neurogenesis	GO:BP	5.78e-18	1679	320	ENSG00000151892, ENSG00000066468, ENSG00000151640, ENSG00000148803, ENSG00000170759, ENSG00000099250, ENSG00000177283, ENSG00000165731, ENSG00000107984, ENSG00000122877, ENSG00000138347, ENSG00000107731, ENSG00000148677, ENSG00000187240, ENSG00000137642, ENSG00000154133, ENSG00000149571, ENSG00000110693, ENSG00000176697, ENSG00000007372, ENSG00000148948, ENSG00000110492, ENSG00000134569, ENSG0000…	GFRA1, FGFR2, DPYSL4, FUOM, KIF5B, NRP1, FZD8, RET, DKK1, EGR2, MYPN, UNC5B, ANKRD1, DYNC2H1, SORL1, ROBO4, KIRREL3, SOX6, BDNF, PAX6, LRRC4C, MDK, LRP4, MYRF, ROM1, EHD1, PPP2R5B, DCHS1, FOLR1, MTMR2, NOS1, SRRM4, CCDC64, PTPRO, BHLHE41, LRRK2, CNTN1, ERBB3, NAB2, KIF5A, AVIL, GRIP1, PTPRQ, PPFIA2, NTN4, MYO16, GAS6, ATP8A2, WASF3, FRY, DCLK1, POSTN, EDNRB, SLITRK1, SLITRK6, FARP1, MMP14, MDGA2,…	any
GO:0040011	locomotion	GO:BP	8.54e-18	2010	367	ENSG00000151892, ENSG00000019995, ENSG00000151640, ENSG00000151651, ENSG00000095739, ENSG00000165757, ENSG00000170759, ENSG00000099250, ENSG00000165731, ENSG00000072422, ENSG00000150347, ENSG00000122877, ENSG00000138347, ENSG00000107731, ENSG00000107738, ENSG00000156026, ENSG00000122861, ENSG00000137710, ENSG00000076706, ENSG00000137642, ENSG00000149564, ENSG00000154133, ENSG00000149571, ENSG0000…	GFRA1, ZRANB1, DPYSL4, ADAM8, BAMBI, KIAA1462, KIF5B, NRP1, RET, RHOBTB1, ARID5B, EGR2, MYPN, UNC5B, C10orf54, MCU, PLAU, RDX, MCAM, SORL1, ESAM, ROBO4, KIRREL3, RRAS2, BDNF, IFITM1, PAX6, CD44, PRR5L, MDK, OR51E2, FERMT3, FAM89B, FOSL1, DCHS1, LRP5, FOLR1, WDR66, PTPRO, TSPAN11, LRRK2, FMNL3, ACVRL1, ITGB7, ERBB3, KIF5A, PTPRR, C3AR1, DCN, BTG1, NTN4, C12orf55, GAS6, FGF9, FLT1, DCLK1, POSTN, RG…	any
GO:0048731	system development	GO:BP	8.98e-18	5020	429	ENSG00000151892, ENSG00000151651, ENSG00000148803, ENSG00000165757, ENSG00000099250, ENSG00000177283, ENSG00000067082, ENSG00000165731, ENSG00000165512, ENSG00000128805, ENSG00000107984, ENSG00000165471, ENSG00000150347, ENSG00000122877, ENSG00000138347, ENSG00000107731, ENSG00000108175, ENSG00000137745, ENSG00000187240, ENSG00000050165, ENSG00000166250, ENSG00000154133, ENSG00000151702, ENSG0000…	GFRA1, ADAM8, FUOM, KIAA1462, NRP1, FZD8, KLF6, RET, ZNF22, ARHGAP22, DKK1, MBL2, ARID5B, EGR2, MYPN, UNC5B, ZMIZ1, MMP13, DYNC2H1, DKK3, CLMP, ROBO4, FLI1, IGSF9B, CD44, LRRC4C, MDK, LRP4, MYRF, ROM1, RARRES3, NRXN2, BATF2, LTBP3, FOSL1, TPP1, DCHS1, DGAT2, SH2B3, OAS2, NOS1, BHLHE41, LRRK2, RAPGEF3, FMNL3, ACVRL1, KRT75, TESPA1, ITGA7, NAB2, STAC3, KIF5A, AVIL, LRIG3, HMGA2, LIN7A, PPFIA2, C3AR…	upregulated
GO:0048513	animal organ development	GO:BP	1.46e-17	3677	592	ENSG00000099204, ENSG00000107518, ENSG00000066468, ENSG00000170430, ENSG00000151651, ENSG00000078114, ENSG00000099246, ENSG00000095739, ENSG00000170759, ENSG00000099250, ENSG00000177283, ENSG00000067082, ENSG00000165731, ENSG00000165512, ENSG00000107984, ENSG00000165471, ENSG00000150347, ENSG00000122877, ENSG00000122862, ENSG00000107738, ENSG00000108175, ENSG00000122367, ENSG00000198682, ENSG0000…	ABLIM1, ATRNL1, FGFR2, MGMT, ADAM8, NEBL, RAB18, BAMBI, KIF5B, NRP1, FZD8, KLF6, RET, ZNF22, DKK1, MBL2, ARID5B, EGR2, SRGN, C10orf54, ZMIZ1, LDB3, PAPSS2, ACTA2, ANKRD1, TLL2, ANKRD2, MMP13, DYNC2H1, CRYAB, IL18, TAGLN, DKK3, SORL1, UBASH3B, KIRREL3, FLI1, SOX6, LGR4, BDNF, PAX6, CD44, PKP3, MDK, LRP4, ROM1, RARRES3, BATF2, LTBP3, FOSL1, DCHS1, LRP5, FOLR1, DGAT2, SH2B3, OAS2, STX2, MGP, PTPRO, …	any
GO:0000902	cell morphogenesis	GO:BP	6.04e-17	1068	225	ENSG00000107554, ENSG00000151892, ENSG00000066468, ENSG00000019995, ENSG00000151640, ENSG00000151651, ENSG00000095739, ENSG00000170759, ENSG00000099250, ENSG00000165731, ENSG00000107984, ENSG00000165471, ENSG00000072422, ENSG00000122877, ENSG00000138347, ENSG00000107731, ENSG00000137710, ENSG00000154133, ENSG00000149571, ENSG00000110693, ENSG00000176697, ENSG00000007372, ENSG00000026508, ENSG0000…	DNMBP, GFRA1, FGFR2, ZRANB1, DPYSL4, ADAM8, BAMBI, KIF5B, NRP1, RET, DKK1, MBL2, RHOBTB1, EGR2, MYPN, UNC5B, RDX, ROBO4, KIRREL3, SOX6, BDNF, PAX6, CD44, LRRC4C, MDK, LRP4, FERMT3, PTPRO, FGD4, LRRK2, FMNL3, ITGB7, ITGA7, KIF5A, GRIP1, PTPRQ, PPFIA2, NTN4, MYO16, ATP8A2, WASF3, FRY, DCLK1, POSTN, SLITRK1, SLITRK6, FARP1, FERMT2, SPTB, ACTN1, RPS6KA5, SYNE3, ATP10A, SEMA6D, TPM1, NPTN, CHRNA3, SEM…	any
GO:0007275	multicellular organism development	GO:BP	7.25e-17	5604	463	ENSG00000138166, ENSG00000151892, ENSG00000187908, ENSG00000151651, ENSG00000148803, ENSG00000165757, ENSG00000099250, ENSG00000177283, ENSG00000067082, ENSG00000165731, ENSG00000165512, ENSG00000128805, ENSG00000107984, ENSG00000165471, ENSG00000150347, ENSG00000122877, ENSG00000138347, ENSG00000107731, ENSG00000108175, ENSG00000137745, ENSG00000187240, ENSG00000050165, ENSG00000166250, ENSG0000…	DUSP5, GFRA1, DMBT1, ADAM8, FUOM, KIAA1462, NRP1, FZD8, KLF6, RET, ZNF22, ARHGAP22, DKK1, MBL2, ARID5B, EGR2, MYPN, UNC5B, ZMIZ1, MMP13, DYNC2H1, DKK3, CLMP, ROBO4, FLI1, IGSF9B, CD44, LRRC4C, MDK, LRP4, MYRF, ROM1, RARRES3, NRXN2, BATF2, LTBP3, FOSL1, TPP1, DCHS1, DGAT2, SH2B3, OAS2, NOS1, BHLHE41, LRRK2, RAPGEF3, FMNL3, ACVRL1, KRT75, TESPA1, ITGA7, NAB2, STAC3, KIF5A, AVIL, LRIG3, HMGA2, LIN7A…	upregulated
GO:0032501	multicellular organismal process	GO:BP	1.47e-16	7873	600	ENSG00000099194, ENSG00000138166, ENSG00000151892, ENSG00000187908, ENSG00000151651, ENSG00000148803, ENSG00000107611, ENSG00000165757, ENSG00000099250, ENSG00000177283, ENSG00000067082, ENSG00000165731, ENSG00000165512, ENSG00000128805, ENSG00000107984, ENSG00000165471, ENSG00000150347, ENSG00000122877, ENSG00000148634, ENSG00000138347, ENSG00000107731, ENSG00000122861, ENSG00000108175, ENSG0000…	SCD, DUSP5, GFRA1, DMBT1, ADAM8, FUOM, CUBN, KIAA1462, NRP1, FZD8, KLF6, RET, ZNF22, ARHGAP22, DKK1, MBL2, ARID5B, EGR2, HERC4, MYPN, UNC5B, PLAU, ZMIZ1, RNLS, MMP13, DYNC2H1, AMPD3, DKK3, CLMP, ROBO4, FLI1, IGSF9B, TSPAN32, IFITM1, CD44, LRRC4C, SIGIRR, MDK, LRP4, HBE1, AC104389.28, HBG2, SERPING1, SYT7, MYRF, ROM1, RARRES3, FERMT3, NRXN2, BATF2, LTBP3, FOSL1, CNIH2, RIN1, TPP1, DCHS1, DGAT2, SH…	upregulated
GO:0031012	extracellular matrix	GO:CC	1.63e-16	534	135	ENSG00000066468, ENSG00000187908, ENSG00000165471, ENSG00000137745, ENSG00000166106, ENSG00000110492, ENSG00000149131, ENSG00000149506, ENSG00000168056, ENSG00000111341, ENSG00000139263, ENSG00000197614, ENSG00000011465, ENSG00000175899, ENSG00000074527, ENSG00000102678, ENSG00000133110, ENSG00000183098, ENSG00000157227, ENSG00000131981, ENSG00000198732, ENSG00000119681, ENSG00000197249, ENSG0000…	FGFR2, DMBT1, MBL2, MMP13, ADAMTS15, MDK, SERPING1, ZP1, LTBP3, MGP, LRIG3, MFAP5, DCN, A2M, NTN4, FGF9, POSTN, GPC6, MMP14, LGALS3, SMOC1, LTBP2, SERPINA1, PCSK6, THBS1, ACAN, MMP25, MMP2, MMP15, CRISPLD2, SERPINF1, LGALS9, NTN1, CDH2, EMILIN2, COLEC12, CCBE1, GDF15, TGFB1, BCAM, APOE, COL11A1, VWA1, S100A4, THBS3, BCAN, CHI3L1, LRRN2, LAMB3, TGFB2, AGT, NID1, TINAGL1, COL16A1, COL8A2, CYR61, MM…	any
GO:0030054	cell junction	GO:CC	4.78e-16	1327	260	ENSG00000107554, ENSG00000148484, ENSG00000150054, ENSG00000165757, ENSG00000099250, ENSG00000170324, ENSG00000128805, ENSG00000122861, ENSG00000137710, ENSG00000204381, ENSG00000182985, ENSG00000076706, ENSG00000149403, ENSG00000166250, ENSG00000149564, ENSG00000080854, ENSG00000133818, ENSG00000026508, ENSG00000184363, ENSG00000148948, ENSG00000011347, ENSG00000124942, ENSG00000149781, ENSG0000…	DNMBP, RSU1, MPP7, KIAA1462, NRP1, FRMPD2, ARHGAP22, PLAU, RDX, LAYN, CADM1, MCAM, GRIK4, CLMP, ESAM, IGSF9B, RRAS2, CD44, PKP3, LRRC4C, SYT7, AHNAK, FERMT3, RASGRP2, CNIH2, CAPN5, NOS1, RIMBP2, PKP2, LRRK2, SMAGP, SCN8A, ITGB7, PLEKHG6, GRIP1, PTPRR, LIN7A, ATP2B1, FLT1, LCP1, HTR2A, PCDH9, KCTD12, SLITRK1, CLDN10, FARP1, MMP14, AJUBA, FERMT2, SAMD4A, MPP5, ACTN1, GABRA5, GABRB3, TJP1, FMN1, ACT…	any
GO:0016021	integral component of membrane	GO:CC	5.24e-16	5692	840	ENSG00000099194, ENSG00000108018, ENSG00000197142, ENSG00000107518, ENSG00000203805, ENSG00000066468, ENSG00000182022, ENSG00000148848, ENSG00000151651, ENSG00000165996, ENSG00000148483, ENSG00000204740, ENSG00000120594, ENSG00000095739, ENSG00000099250, ENSG00000177283, ENSG00000165731, ENSG00000204176, ENSG00000204174, ENSG00000198964, ENSG00000099282, ENSG00000171224, ENSG00000107731, ENSG0000…	SCD, SORCS1, ACSL5, ATRNL1, PPAPDC1A, FGFR2, CHST15, ADAM12, ADAM8, PTPLA, TMEM236, MALRD1, PLXDC2, BAMBI, NRP1, FZD8, RET, SYT15, NPY4R, SGMS1, TSPAN15, C10orf35, UNC5B, C10orf54, CHST3, MCU, TSPAN14, SLC16A12, SLC35G1, HOGA1, MRVI1, C11orf87, LAYN, CADM1, GALNT18, PCSK7, MPZL3, MCAM, GRIK4, SC5D, SORL1, CLMP, GRAMD1B, ESAM, ROBO4, SLC37A2, KIRREL3, TMEM45B, IGSF9B, TMEM86A, ANO5, TSPAN32, LGR4,…	any
GO:0016477	cell migration	GO:BP	7.83e-16	1620	304	ENSG00000019995, ENSG00000151651, ENSG00000095739, ENSG00000165757, ENSG00000099250, ENSG00000165731, ENSG00000072422, ENSG00000150347, ENSG00000107738, ENSG00000156026, ENSG00000122861, ENSG00000137710, ENSG00000076706, ENSG00000137642, ENSG00000149564, ENSG00000154133, ENSG00000149571, ENSG00000133818, ENSG00000185885, ENSG00000007372, ENSG00000026508, ENSG00000135362, ENSG00000110492, ENSG0000…	ZRANB1, ADAM8, BAMBI, KIAA1462, NRP1, RET, RHOBTB1, ARID5B, C10orf54, MCU, PLAU, RDX, MCAM, SORL1, ESAM, ROBO4, KIRREL3, RRAS2, IFITM1, PAX6, CD44, PRR5L, MDK, OR51E2, FERMT3, FAM89B, DCHS1, LRP5, FOLR1, PTPRO, TSPAN11, LRRK2, FMNL3, ACVRL1, ITGB7, PTPRR, C3AR1, DCN, BTG1, NTN4, GAS6, FGF9, FLT1, DCLK1, POSTN, RGCC, LCP1, EDNRB, GPC6, GPR18, SLC7A7, MMP14, AJUBA, SLC7A8, EFS, RIPK3, BMP4, LGALS3,…	any
GO:0048699	generation of neurons	GO:BP	9.66e-16	1574	297	ENSG00000151892, ENSG00000066468, ENSG00000151640, ENSG00000148803, ENSG00000170759, ENSG00000099250, ENSG00000177283, ENSG00000165731, ENSG00000107984, ENSG00000122877, ENSG00000138347, ENSG00000107731, ENSG00000148677, ENSG00000187240, ENSG00000137642, ENSG00000154133, ENSG00000149571, ENSG00000176697, ENSG00000007372, ENSG00000148948, ENSG00000110492, ENSG00000134569, ENSG00000149489, ENSG0000…	GFRA1, FGFR2, DPYSL4, FUOM, KIF5B, NRP1, FZD8, RET, DKK1, EGR2, MYPN, UNC5B, ANKRD1, DYNC2H1, SORL1, ROBO4, KIRREL3, BDNF, PAX6, LRRC4C, MDK, LRP4, ROM1, EHD1, PPP2R5B, FOLR1, MTMR2, NOS1, SRRM4, CCDC64, PTPRO, BHLHE41, LRRK2, CNTN1, KIF5A, AVIL, GRIP1, PTPRQ, PPFIA2, NTN4, MYO16, GAS6, ATP8A2, FRY, DCLK1, POSTN, EDNRB, SLITRK1, SLITRK6, FARP1, MDGA2, BMP4, SPTB, RPS6KA5, CLMN, GABRA5, GABRB3, SP…	any
GO:0048870	cell motility	GO:BP	1.63e-15	1781	326	ENSG00000019995, ENSG00000151651, ENSG00000095739, ENSG00000165757, ENSG00000099250, ENSG00000165731, ENSG00000072422, ENSG00000150347, ENSG00000107738, ENSG00000156026, ENSG00000122861, ENSG00000137710, ENSG00000076706, ENSG00000137642, ENSG00000149564, ENSG00000154133, ENSG00000149571, ENSG00000133818, ENSG00000185885, ENSG00000007372, ENSG00000026508, ENSG00000135362, ENSG00000110492, ENSG0000…	ZRANB1, ADAM8, BAMBI, KIAA1462, NRP1, RET, RHOBTB1, ARID5B, C10orf54, MCU, PLAU, RDX, MCAM, SORL1, ESAM, ROBO4, KIRREL3, RRAS2, IFITM1, PAX6, CD44, PRR5L, MDK, OR51E2, FERMT3, FAM89B, DCHS1, LRP5, FOLR1, WDR66, PTPRO, TSPAN11, LRRK2, FMNL3, ACVRL1, ITGB7, ERBB3, PTPRR, C3AR1, DCN, BTG1, NTN4, C12orf55, GAS6, FGF9, FLT1, DCLK1, POSTN, RGCC, LCP1, EDNRB, GPC6, GPR18, SLC7A7, MMP14, AJUBA, SLC7A8, E…	any
GO:0051674	localization of cell	GO:BP	1.63e-15	1781	326	ENSG00000019995, ENSG00000151651, ENSG00000095739, ENSG00000165757, ENSG00000099250, ENSG00000165731, ENSG00000072422, ENSG00000150347, ENSG00000107738, ENSG00000156026, ENSG00000122861, ENSG00000137710, ENSG00000076706, ENSG00000137642, ENSG00000149564, ENSG00000154133, ENSG00000149571, ENSG00000133818, ENSG00000185885, ENSG00000007372, ENSG00000026508, ENSG00000135362, ENSG00000110492, ENSG0000…	ZRANB1, ADAM8, BAMBI, KIAA1462, NRP1, RET, RHOBTB1, ARID5B, C10orf54, MCU, PLAU, RDX, MCAM, SORL1, ESAM, ROBO4, KIRREL3, RRAS2, IFITM1, PAX6, CD44, PRR5L, MDK, OR51E2, FERMT3, FAM89B, DCHS1, LRP5, FOLR1, WDR66, PTPRO, TSPAN11, LRRK2, FMNL3, ACVRL1, ITGB7, ERBB3, PTPRR, C3AR1, DCN, BTG1, NTN4, C12orf55, GAS6, FGF9, FLT1, DCLK1, POSTN, RGCC, LCP1, EDNRB, GPC6, GPR18, SLC7A7, MMP14, AJUBA, SLC7A8, E…	any
GO:0030198	extracellular matrix organization	GO:BP	3.29e-15	375	105	ENSG00000148848, ENSG00000151651, ENSG00000138316, ENSG00000095587, ENSG00000137745, ENSG00000160588, ENSG00000026508, ENSG00000139626, ENSG00000135424, ENSG00000197614, ENSG00000011465, ENSG00000175899, ENSG00000074527, ENSG00000183087, ENSG00000133110, ENSG00000102760, ENSG00000136167, ENSG00000157227, ENSG00000137801, ENSG00000166145, ENSG00000166415, ENSG00000166949, ENSG00000157766, ENSG0000…	ADAM12, ADAM8, ADAMTS14, TLL2, MMP13, MPZL3, CD44, ITGB7, ITGA7, MFAP5, DCN, A2M, NTN4, GAS6, POSTN, RGCC, LCP1, MMP14, THBS1, SPINT1, WDR72, SMAD3, ACAN, MMP25, ITGAX, ITGAD, MMP2, MMP15, CRISPLD2, ITGAE, GFAP, SOX9, TGFB1, BCL3, VCAM1, COL11A1, TNFRSF1B, VWA1, PDPN, ITGA10, BCAN, LAMB3, TGFB2, AGT, NID1, COL16A1, COL8A2, CYR61, MMP24, COL6A1, COL6A2, SCUBE1, DPP4, FAP, ITGA4, MATN3, FN1, COL4A4…	any
GO:0043062	extracellular structure organization	GO:BP	4.06e-15	376	105	ENSG00000148848, ENSG00000151651, ENSG00000138316, ENSG00000095587, ENSG00000137745, ENSG00000160588, ENSG00000026508, ENSG00000139626, ENSG00000135424, ENSG00000197614, ENSG00000011465, ENSG00000175899, ENSG00000074527, ENSG00000183087, ENSG00000133110, ENSG00000102760, ENSG00000136167, ENSG00000157227, ENSG00000137801, ENSG00000166145, ENSG00000166415, ENSG00000166949, ENSG00000157766, ENSG0000…	ADAM12, ADAM8, ADAMTS14, TLL2, MMP13, MPZL3, CD44, ITGB7, ITGA7, MFAP5, DCN, A2M, NTN4, GAS6, POSTN, RGCC, LCP1, MMP14, THBS1, SPINT1, WDR72, SMAD3, ACAN, MMP25, ITGAX, ITGAD, MMP2, MMP15, CRISPLD2, ITGAE, GFAP, SOX9, TGFB1, BCL3, VCAM1, COL11A1, TNFRSF1B, VWA1, PDPN, ITGA10, BCAN, LAMB3, TGFB2, AGT, NID1, COL16A1, COL8A2, CYR61, MMP24, COL6A1, COL6A2, SCUBE1, DPP4, FAP, ITGA4, MATN3, FN1, COL4A4…	any
GO:0031012	extracellular matrix	GO:CC	4.08e-15	534	85	ENSG00000187908, ENSG00000165471, ENSG00000137745, ENSG00000110492, ENSG00000149131, ENSG00000149506, ENSG00000168056, ENSG00000139263, ENSG00000011465, ENSG00000175899, ENSG00000133110, ENSG00000183098, ENSG00000157227, ENSG00000131981, ENSG00000198732, ENSG00000119681, ENSG00000197249, ENSG00000008516, ENSG00000087245, ENSG00000132386, ENSG00000168961, ENSG00000132205, ENSG00000158270, ENSG0000…	DMBT1, MBL2, MMP13, MDK, SERPING1, ZP1, LTBP3, LRIG3, DCN, A2M, POSTN, GPC6, MMP14, LGALS3, SMOC1, LTBP2, SERPINA1, MMP25, MMP2, SERPINF1, LGALS9, EMILIN2, COLEC12, GDF15, TGFB1, BCAM, VWA1, S100A4, THBS3, BCAN, CHI3L1, LAMB3, NID1, COL8A2, CYR61, TGM2, EMILIN3, WISP2, COL6A1, COL6A2, EMID1, TMEFF2, FN1, SERPINE2, COL6A3, EMILIN1, ABI3BP, TIMP4, COLQ, PTX3, ITIH4, SPON2, FGB, FGG, TGFBI, HAPLN1, …	upregulated
GO:0030198	extracellular matrix organization	GO:BP	5.54e-15	375	70	ENSG00000151651, ENSG00000138316, ENSG00000137745, ENSG00000026508, ENSG00000139626, ENSG00000135424, ENSG00000011465, ENSG00000175899, ENSG00000133110, ENSG00000102760, ENSG00000157227, ENSG00000166145, ENSG00000166415, ENSG00000166949, ENSG00000008516, ENSG00000140678, ENSG00000156886, ENSG00000087245, ENSG00000131095, ENSG00000125398, ENSG00000105329, ENSG00000069399, ENSG00000162692, ENSG0000…	ADAM8, ADAMTS14, MMP13, CD44, ITGB7, ITGA7, DCN, A2M, POSTN, RGCC, MMP14, SPINT1, WDR72, SMAD3, MMP25, ITGAX, ITGAD, MMP2, GFAP, SOX9, TGFB1, BCL3, VCAM1, TNFRSF1B, VWA1, ITGA10, BCAN, LAMB3, NID1, COL8A2, CYR61, COL6A1, COL6A2, DPP4, FAP, ITGA4, FN1, COL6A3, EMILIN1, ABI3BP, COLQ, PTX3, KIF9, FGB, FGG, PDGFRA, IBSP, SPP1, TGFBI, SPINK5, ITGA2, HAPLN1, LAMA4, COL10A1, LAMA2, TNXB, LAMB4, ITGB8, I…	upregulated
GO:0015629	actin cytoskeleton	GO:CC	5.63e-15	517	83	ENSG00000099204, ENSG00000078114, ENSG00000122367, ENSG00000107796, ENSG00000137710, ENSG00000109846, ENSG00000139354, ENSG00000196465, ENSG00000092841, ENSG00000177425, ENSG00000041515, ENSG00000102755, ENSG00000136167, ENSG00000165410, ENSG00000073712, ENSG00000070182, ENSG00000072110, ENSG00000104067, ENSG00000159251, ENSG00000128872, ENSG00000138594, ENSG00000128849, ENSG00000263155, ENSG0000…	ABLIM1, NEBL, LDB3, ACTA2, RDX, CRYAB, GAS2L3, MYL6B, MYL6, PAWR, MYO16, FLT1, LCP1, CFL2, FERMT2, SPTB, ACTN1, TJP1, ACTC1, TMOD2, TMOD3, CGNL1, MYZAP, TPM1, COTL1, MYH8, MYH1, MYH2, MYH3, SPECC1, FAM101B, TAX1BP3, SLC9A3R1, LLGL2, MYH10, CDH2, MYOM1, MYL12A, MYL12B, FHOD3, MYH14, CGN, ARPC5, TNNT2, TNNI1, LMOD1, GNG12, NEXN, GBP1, CNN3, DSTN, MYL9, ITSN1, MYO7B, MYL1, EFR3B, KALRN, PLS1, TNNC1,…	downregulated
GO:0043062	extracellular structure organization	GO:BP	6.44e-15	376	70	ENSG00000151651, ENSG00000138316, ENSG00000137745, ENSG00000026508, ENSG00000139626, ENSG00000135424, ENSG00000011465, ENSG00000175899, ENSG00000133110, ENSG00000102760, ENSG00000157227, ENSG00000166145, ENSG00000166415, ENSG00000166949, ENSG00000008516, ENSG00000140678, ENSG00000156886, ENSG00000087245, ENSG00000131095, ENSG00000125398, ENSG00000105329, ENSG00000069399, ENSG00000162692, ENSG0000…	ADAM8, ADAMTS14, MMP13, CD44, ITGB7, ITGA7, DCN, A2M, POSTN, RGCC, MMP14, SPINT1, WDR72, SMAD3, MMP25, ITGAX, ITGAD, MMP2, GFAP, SOX9, TGFB1, BCL3, VCAM1, TNFRSF1B, VWA1, ITGA10, BCAN, LAMB3, NID1, COL8A2, CYR61, COL6A1, COL6A2, DPP4, FAP, ITGA4, FN1, COL6A3, EMILIN1, ABI3BP, COLQ, PTX3, KIF9, FGB, FGG, PDGFRA, IBSP, SPP1, TGFBI, SPINK5, ITGA2, HAPLN1, LAMA4, COL10A1, LAMA2, TNXB, LAMB4, ITGB8, I…	upregulated
GO:0051239	regulation of multicellular organismal process	GO:BP	1.66e-14	3356	306	ENSG00000099194, ENSG00000151651, ENSG00000148803, ENSG00000165757, ENSG00000099250, ENSG00000165731, ENSG00000107984, ENSG00000122877, ENSG00000122861, ENSG00000108175, ENSG00000184719, ENSG00000080854, ENSG00000185885, ENSG00000148948, ENSG00000185187, ENSG00000110492, ENSG00000134569, ENSG00000149131, ENSG00000011347, ENSG00000124920, ENSG00000133321, ENSG00000168056, ENSG00000174871, ENSG0000…	SCD, ADAM8, FUOM, KIAA1462, NRP1, RET, DKK1, EGR2, PLAU, ZMIZ1, RNLS, IGSF9B, IFITM1, LRRC4C, SIGIRR, MDK, LRP4, SERPING1, SYT7, MYRF, RARRES3, LTBP3, CNIH2, SH2B3, OAS2, NOS1, CACNA2D4, BHLHE41, LRRK2, RAPGEF3, ACVRL1, TESPA1, AVIL, HMGA2, TSPAN8, PPFIA2, C3AR1, DUSP6, ATP2B1, DCN, BTG1, POSTN, RGCC, EDNRB, SLITRK1, SLITRK6, GPC6, GPR18, BEGAIN, MMP14, ZFHX2, RIPK3, LGALS3, ZFP36L1, SMOC1, FOS, …	upregulated
GO:0051270	regulation of cellular component movement	GO:BP	3.12e-14	1129	226	ENSG00000151651, ENSG00000165757, ENSG00000099250, ENSG00000165731, ENSG00000072422, ENSG00000107738, ENSG00000156026, ENSG00000122861, ENSG00000137710, ENSG00000076706, ENSG00000137642, ENSG00000154133, ENSG00000133818, ENSG00000185885, ENSG00000007372, ENSG00000135362, ENSG00000110492, ENSG00000149781, ENSG00000176973, ENSG00000174871, ENSG00000151490, ENSG00000057294, ENSG00000139567, ENSG0000…	ADAM8, KIAA1462, NRP1, RET, RHOBTB1, C10orf54, MCU, PLAU, RDX, MCAM, SORL1, ROBO4, RRAS2, IFITM1, PAX6, PRR5L, MDK, FERMT3, FAM89B, CNIH2, PTPRO, PKP2, ACVRL1, ERBB3, PTPRR, C3AR1, DCN, GAS6, FGF9, FLT1, POSTN, RGCC, GPR18, MMP14, AJUBA, RIPK3, BMP4, LGALS3, ACTN1, LGMN, TJP1, THBS1, SEMA6D, FGF7, TPM1, DAPK2, SMAD3, SEMA4B, NR2F2, IGF1R, CORO1A, PYCARD, ITGAX, NKD1, GPR56, MARVELD3, SERPINF1, LG…	any
GO:0040011	locomotion	GO:BP	4.21e-14	2010	208	ENSG00000151892, ENSG00000151651, ENSG00000165757, ENSG00000099250, ENSG00000165731, ENSG00000150347, ENSG00000122877, ENSG00000138347, ENSG00000107731, ENSG00000122861, ENSG00000149564, ENSG00000154133, ENSG00000185885, ENSG00000026508, ENSG00000110492, ENSG00000149781, ENSG00000176973, ENSG00000175592, ENSG00000166341, ENSG00000110900, ENSG00000188906, ENSG00000161791, ENSG00000139567, ENSG0000…	GFRA1, ADAM8, KIAA1462, NRP1, RET, ARID5B, EGR2, MYPN, UNC5B, PLAU, ESAM, ROBO4, IFITM1, CD44, MDK, FERMT3, FAM89B, FOSL1, DCHS1, TSPAN11, LRRK2, FMNL3, ACVRL1, ITGB7, KIF5A, C3AR1, DCN, BTG1, C12orf55, POSTN, RGCC, EDNRB, GPC6, GPR18, MMP14, SLC7A8, EFS, RIPK3, LGALS3, RPS6KA5, SEMA6D, FGF7, DYX1C1, DAPK2, SMAD3, SEMA4B, CORO1A, HSD3B7, PYCARD, ITGAX, GPR56, TUBB3, TUBB3, SERPINF1, LGALS9, CORO6…	upregulated
GO:0065008	regulation of biological quality	GO:BP	4.4e-14	4156	637	ENSG00000107554, ENSG00000099194, ENSG00000151651, ENSG00000107611, ENSG00000204740, ENSG00000095739, ENSG00000170759, ENSG00000099250, ENSG00000165731, ENSG00000128805, ENSG00000107984, ENSG00000072422, ENSG00000122877, ENSG00000122862, ENSG00000156026, ENSG00000122861, ENSG00000198682, ENSG00000184719, ENSG00000107796, ENSG00000176273, ENSG00000133805, ENSG00000137710, ENSG00000109846, ENSG0000…	DNMBP, SCD, ADAM8, CUBN, MALRD1, BAMBI, KIF5B, NRP1, RET, ARHGAP22, DKK1, RHOBTB1, EGR2, SRGN, MCU, PLAU, PAPSS2, RNLS, ACTA2, SLC35G1, AMPD3, RDX, CRYAB, IL18, BCO2, PCSK7, DKK3, GRIK4, SORL1, UBASH3B, GRAMD1B, ESAM, FLI1, IGSF9B, SOX6, HPS5, TSPAN32, LGR4, BDNF, PAX6, LRP4, OR51E2, HBE1, TRIM6, HBG2, SERPING1, SYT7, FERMT3, NRXN2, EHD1, LTBP3, CNIH2, RIN1, SLC29A2, TPP1, LRP5, DGAT2, RIC3, MTMR…	any
GO:0035295	tube development	GO:BP	7.1e-14	1143	139	ENSG00000151651, ENSG00000165757, ENSG00000099250, ENSG00000177283, ENSG00000165731, ENSG00000128805, ENSG00000107731, ENSG00000108175, ENSG00000166250, ENSG00000154133, ENSG00000110492, ENSG00000168056, ENSG00000166341, ENSG00000079337, ENSG00000161791, ENSG00000139567, ENSG00000149948, ENSG00000171860, ENSG00000011465, ENSG00000133639, ENSG00000102760, ENSG00000136160, ENSG00000157227, ENSG0000…	ADAM8, KIAA1462, NRP1, FZD8, RET, ARHGAP22, UNC5B, ZMIZ1, CLMP, ROBO4, MDK, LTBP3, DCHS1, RAPGEF3, FMNL3, ACVRL1, HMGA2, C3AR1, DCN, BTG1, RGCC, EDNRB, MMP14, REC8, ZFP36L1, FMN1, SLC12A6, SPINT1, FGF7, SMAD3, NOX5, ANPEP, ITGAX, IRX3, MMP2, GPR56, SERPINF1, CCL2, JUP, WNK4, CCDC103, HOXB7, SOX9, SPHK1, CCDC40, RNF213, TMEM107, JUNB, MIR27A, MIR23A, CRLF1, TGFB1, CEACAM1, LRG1, RCN3, C3, VAV3, CS…	upregulated
GO:0042995	cell projection	GO:CC	9.63e-14	2288	388	ENSG00000120051, ENSG00000099204, ENSG00000107611, ENSG00000165757, ENSG00000170759, ENSG00000099250, ENSG00000165731, ENSG00000183346, ENSG00000138347, ENSG00000122367, ENSG00000107796, ENSG00000187240, ENSG00000137710, ENSG00000204381, ENSG00000109846, ENSG00000154133, ENSG00000149571, ENSG00000080854, ENSG00000176697, ENSG00000026508, ENSG00000019505, ENSG00000110492, ENSG00000134569, ENSG0000…	CCDC147, ABLIM1, CUBN, KIAA1462, KIF5B, NRP1, RET, C10orf107, MYPN, LDB3, ACTA2, DYNC2H1, RDX, LAYN, CRYAB, ROBO4, KIRREL3, IGSF9B, BDNF, CD44, SYT13, MDK, LRP4, AGBL2, SYT7, ROM1, FERMT3, RASGRP2, EHD1, DNHD1, FAM89B, FOSL1, CNIH2, RIN1, FOLR1, RIC3, MTMR2, GABARAPL1, NOS1, WDR66, STX2, PTPRO, FGD4, LRRK2, SLC38A1, RAPGEF3, SCN8A, ACVRL1, KIF5A, AVIL, ANO2, PLEKHG6, SCNN1A, GRIP1, RAB3IP, TPH2, …	any
GO:0062023	collagen-containing extracellular matrix	GO:CC	1.28e-13	407	106	ENSG00000066468, ENSG00000165471, ENSG00000166106, ENSG00000110492, ENSG00000149131, ENSG00000149506, ENSG00000168056, ENSG00000111341, ENSG00000197614, ENSG00000011465, ENSG00000175899, ENSG00000074527, ENSG00000102678, ENSG00000133110, ENSG00000183098, ENSG00000131981, ENSG00000198732, ENSG00000119681, ENSG00000197249, ENSG00000140479, ENSG00000137801, ENSG00000157766, ENSG00000087245, ENSG0000…	FGFR2, MBL2, ADAMTS15, MDK, SERPING1, ZP1, LTBP3, MGP, MFAP5, DCN, A2M, NTN4, FGF9, POSTN, GPC6, LGALS3, SMOC1, LTBP2, SERPINA1, PCSK6, THBS1, ACAN, MMP2, SERPINF1, LGALS9, NTN1, CDH2, EMILIN2, GDF15, TGFB1, BCAM, APOE, COL11A1, VWA1, S100A4, THBS3, LAMB3, TGFB2, AGT, NID1, TINAGL1, COL16A1, COL8A2, CYR61, TGM2, EMILIN3, SLPI, COL6A1, COL6A2, TMEFF2, MATN3, FN1, SERPINE2, COL4A4, COL4A3, COL6A3, …	any
GO:0051674	localization of cell	GO:BP	1.42e-13	1781	189	ENSG00000151651, ENSG00000165757, ENSG00000099250, ENSG00000165731, ENSG00000150347, ENSG00000122861, ENSG00000149564, ENSG00000154133, ENSG00000185885, ENSG00000026508, ENSG00000110492, ENSG00000149781, ENSG00000176973, ENSG00000166341, ENSG00000110900, ENSG00000188906, ENSG00000161791, ENSG00000139567, ENSG00000139626, ENSG00000171860, ENSG00000011465, ENSG00000133639, ENSG00000188596, ENSG0000…	ADAM8, KIAA1462, NRP1, RET, ARID5B, PLAU, ESAM, ROBO4, IFITM1, CD44, MDK, FERMT3, FAM89B, DCHS1, TSPAN11, LRRK2, FMNL3, ACVRL1, ITGB7, C3AR1, DCN, BTG1, C12orf55, POSTN, RGCC, EDNRB, GPC6, GPR18, MMP14, SLC7A8, EFS, RIPK3, LGALS3, SEMA6D, FGF7, DYX1C1, DAPK2, SMAD3, SEMA4B, CORO1A, HSD3B7, PYCARD, ITGAX, GPR56, SERPINF1, LGALS9, CORO6, CCL2, GRB7, JUP, STAT5A, FMNL1, SPNS2, ACE, SOX9, SPHK1, CYGB…	upregulated
GO:0048870	cell motility	GO:BP	1.42e-13	1781	189	ENSG00000151651, ENSG00000165757, ENSG00000099250, ENSG00000165731, ENSG00000150347, ENSG00000122861, ENSG00000149564, ENSG00000154133, ENSG00000185885, ENSG00000026508, ENSG00000110492, ENSG00000149781, ENSG00000176973, ENSG00000166341, ENSG00000110900, ENSG00000188906, ENSG00000161791, ENSG00000139567, ENSG00000139626, ENSG00000171860, ENSG00000011465, ENSG00000133639, ENSG00000188596, ENSG0000…	ADAM8, KIAA1462, NRP1, RET, ARID5B, PLAU, ESAM, ROBO4, IFITM1, CD44, MDK, FERMT3, FAM89B, DCHS1, TSPAN11, LRRK2, FMNL3, ACVRL1, ITGB7, C3AR1, DCN, BTG1, C12orf55, POSTN, RGCC, EDNRB, GPC6, GPR18, MMP14, SLC7A8, EFS, RIPK3, LGALS3, SEMA6D, FGF7, DYX1C1, DAPK2, SMAD3, SEMA4B, CORO1A, HSD3B7, PYCARD, ITGAX, GPR56, SERPINF1, LGALS9, CORO6, CCL2, GRB7, JUP, STAT5A, FMNL1, SPNS2, ACE, SOX9, SPHK1, CYGB…	upregulated
GO:0008092	cytoskeletal protein binding	GO:MF	3.69e-13	991	122	ENSG00000099204, ENSG00000188385, ENSG00000151640, ENSG00000078114, ENSG00000170759, ENSG00000122367, ENSG00000148677, ENSG00000165887, ENSG00000137710, ENSG00000109846, ENSG00000149591, ENSG00000139354, ENSG00000139112, ENSG00000135127, ENSG00000139132, ENSG00000139116, ENSG00000177425, ENSG00000041515, ENSG00000132970, ENSG00000102781, ENSG00000136167, ENSG00000139734, ENSG00000152767, ENSG0000…	ABLIM1, JAKMIP3, DPYSL4, NEBL, KIF5B, LDB3, ANKRD1, ANKRD2, RDX, CRYAB, TAGLN, GAS2L3, GABARAPL1, CCDC64, FGD4, KIF21A, PAWR, MYO16, WASF3, KATNAL1, LCP1, DIAPH3, FARP1, AJUBA, CFL2, FERMT2, SPTB, ACTN1, LGMN, CLMN, ACTC1, TMOD2, TMOD3, TPM1, SYNM, COTL1, MYH8, MYH1, MYH2, MYH3, FAM101B, DUSP3, SKA2, SLC9A3R1, LLGL2, MYH10, CDH2, MYOM1, MYL12B, FHOD3, EPB41L3, CNN1, GIPC1, ATCAY, APOE, MYH14, CAM…	downregulated
GO:0030155	regulation of cell adhesion	GO:BP	4.89e-13	721	159	ENSG00000151651, ENSG00000148484, ENSG00000107968, ENSG00000099250, ENSG00000165731, ENSG00000107738, ENSG00000122861, ENSG00000108175, ENSG00000137710, ENSG00000150782, ENSG00000154127, ENSG00000026508, ENSG00000110492, ENSG00000149781, ENSG00000074590, ENSG00000111252, ENSG00000151490, ENSG00000139567, ENSG00000135426, ENSG00000065361, ENSG00000177425, ENSG00000102524, ENSG00000133110, ENSG0000…	ADAM8, RSU1, MAP3K8, NRP1, RET, C10orf54, PLAU, ZMIZ1, RDX, IL18, UBASH3B, CD44, MDK, FERMT3, NUAK1, SH2B3, PTPRO, ACVRL1, TESPA1, ERBB3, PAWR, TNFSF13B, POSTN, RGCC, MMP14, BMP4, LGALS3, TJP1, FMN1, THBS1, TPM1, SMAD3, CORO1A, PYCARD, ARHGDIG, GPR56, ABAT, LGALS9, CCL2, JUP, DUSP3, SOX9, UNC13D, TWSG1, MIR27A, TGFB1, CEACAM1, FSTL3, CAMSAP3, VCAM1, VAV3, CELSR2, CSF1, PTPN22, PDPN, EFNA1, MUC1, …	any
GO:0006928	movement of cell or subcellular component	GO:BP	7.16e-13	2252	222	ENSG00000151892, ENSG00000151651, ENSG00000165757, ENSG00000099250, ENSG00000165731, ENSG00000150347, ENSG00000122877, ENSG00000138347, ENSG00000107731, ENSG00000122861, ENSG00000187240, ENSG00000149564, ENSG00000154133, ENSG00000185885, ENSG00000026508, ENSG00000110492, ENSG00000149781, ENSG00000179532, ENSG00000176973, ENSG00000174871, ENSG00000166341, ENSG00000110900, ENSG00000188906, ENSG0000…	GFRA1, ADAM8, KIAA1462, NRP1, RET, ARID5B, EGR2, MYPN, UNC5B, PLAU, DYNC2H1, ESAM, ROBO4, IFITM1, CD44, MDK, FERMT3, DNHD1, FAM89B, CNIH2, DCHS1, TSPAN11, LRRK2, FMNL3, ACVRL1, ITGB7, KIF5A, C3AR1, DCN, BTG1, C12orf55, POSTN, RGCC, EDNRB, GPC6, GPR18, MMP14, SLC7A8, EFS, RIPK3, LGALS3, RPS6KA5, SEMA6D, FGF7, DYX1C1, DAPK2, SMAD3, SEMA4B, CORO1A, HSD3B7, PYCARD, ITGAX, GPR56, HYDIN, TUBB3, TUBB3, …	upregulated
GO:0007267	cell-cell signaling	GO:BP	8.39e-13	1699	304	ENSG00000198873, ENSG00000066468, ENSG00000019995, ENSG00000095739, ENSG00000170759, ENSG00000099250, ENSG00000177283, ENSG00000107984, ENSG00000122877, ENSG00000122862, ENSG00000156026, ENSG00000150782, ENSG00000050165, ENSG00000149403, ENSG00000080854, ENSG00000064201, ENSG00000205213, ENSG00000176697, ENSG00000148948, ENSG00000110492, ENSG00000134569, ENSG00000011347, ENSG00000110076, ENSG0000…	GRK5, FGFR2, ZRANB1, BAMBI, KIF5B, NRP1, FZD8, DKK1, EGR2, SRGN, MCU, IL18, DKK3, GRIK4, IGSF9B, TSPAN32, LGR4, BDNF, LRRC4C, MDK, LRP4, SYT7, NRXN2, CNIH2, RIN1, LRP5, FOLR1, RIC3, MTMR2, CRY1, NOS1, RIMBP2, STX2, PTPRO, PKP2, LRRK2, RAPGEF3, IGFBP6, STAC3, KIF5A, HMGA2, LIN7A, PPFIA2, LATS2, FGF9, SHISA2, HTR2A, PCDH17, KLF5, SCEL, GPC6, FARP1, BEGAIN, NDRG2, GNG2, FERMT2, BMP4, AKAP5, GPR68, L…	any
GO:0048869	cellular developmental process	GO:BP	8.89e-13	4531	378	ENSG00000107554, ENSG00000151892, ENSG00000187908, ENSG00000151651, ENSG00000148803, ENSG00000099250, ENSG00000177283, ENSG00000067082, ENSG00000165731, ENSG00000128805, ENSG00000107984, ENSG00000165471, ENSG00000150347, ENSG00000122877, ENSG00000148634, ENSG00000138347, ENSG00000107731, ENSG00000108175, ENSG00000187240, ENSG00000154133, ENSG00000151702, ENSG00000185885, ENSG00000026508, ENSG0000…	DNMBP, GFRA1, DMBT1, ADAM8, FUOM, NRP1, FZD8, KLF6, RET, ARHGAP22, DKK1, MBL2, ARID5B, EGR2, HERC4, MYPN, UNC5B, ZMIZ1, DYNC2H1, ROBO4, FLI1, IFITM1, CD44, LRRC4C, MDK, LRP4, MYRF, ROM1, LGALS12, RARRES3, FERMT3, BATF2, LTBP3, TPP1, DCHS1, SH2B3, NOS1, BHLHE41, LRRK2, RAPGEF3, C1QL4, FMNL3, ACVRL1, KRT75, ITGB7, TESPA1, ITGA7, NAB2, STAC3, KIF5A, AVIL, HMGA2, PPFIA2, DUSP6, BTG1, A2M, C12orf55, P…	upregulated
GO:0030334	regulation of cell migration	GO:BP	1.2e-12	978	198	ENSG00000151651, ENSG00000165757, ENSG00000099250, ENSG00000165731, ENSG00000072422, ENSG00000107738, ENSG00000156026, ENSG00000122861, ENSG00000137710, ENSG00000076706, ENSG00000137642, ENSG00000154133, ENSG00000133818, ENSG00000185885, ENSG00000007372, ENSG00000135362, ENSG00000110492, ENSG00000149781, ENSG00000176973, ENSG00000139567, ENSG00000153233, ENSG00000171860, ENSG00000011465, ENSG0000…	ADAM8, KIAA1462, NRP1, RET, RHOBTB1, C10orf54, MCU, PLAU, RDX, MCAM, SORL1, ROBO4, RRAS2, IFITM1, PAX6, PRR5L, MDK, FERMT3, FAM89B, ACVRL1, PTPRR, C3AR1, DCN, GAS6, FGF9, FLT1, POSTN, RGCC, GPR18, MMP14, AJUBA, RIPK3, BMP4, LGALS3, LGMN, TJP1, THBS1, SEMA6D, FGF7, TPM1, DAPK2, SMAD3, SEMA4B, NR2F2, IGF1R, CORO1A, PYCARD, ITGAX, GPR56, MARVELD3, SERPINF1, LGALS9, CCL2, GRB7, JUP, STAT5A, DUSP3, AC…	any
GO:0098742	cell-cell adhesion via plasma-membrane adhesion molecules	GO:BP	1.22e-12	275	55	ENSG00000165731, ENSG00000138347, ENSG00000149564, ENSG00000154133, ENSG00000080854, ENSG00000148948, ENSG00000166341, ENSG00000184226, ENSG00000178235, ENSG00000183098, ENSG00000134873, ENSG00000101542, ENSG00000079385, ENSG00000162692, ENSG00000162631, ENSG00000158887, ENSG00000075945, ENSG00000125845, ENSG00000075275, ENSG00000189184, ENSG00000204956, ENSG00000081853, ENSG00000254245, ENSG0000…	RET, MYPN, ESAM, ROBO4, IGSF9B, LRRC4C, DCHS1, PCDH9, SLITRK1, GPC6, CLDN10, CDH20, CEACAM1, VCAM1, NTNG1, MPZ, KIFAP3, BMP2, CELSR1, PCDH18, PCDHGA1, PCDHGA2, PCDHGA3, PCDHGB1, PCDHGA4, PCDHGB2, PCDHGA5, PCDHGB3, PCDHGA6, PCDHGA7, PCDHGB4, PCDHGA8, PCDHGA9, PCDHGB6, PCDHGA10, PCDHGB7, PCDHGA11, PCDHGA12, PCDHGC3, PCDHGC4, PCDHGC5, PCDH12, FAT2, CDH18, CDH12, CDH10, CDH9, CDH6, CLDN20, CLDN15, CL…	upregulated
GO:0120025	plasma membrane bounded cell projection	GO:CC	1.24e-12	2200	371	ENSG00000120051, ENSG00000099204, ENSG00000107611, ENSG00000165757, ENSG00000170759, ENSG00000099250, ENSG00000165731, ENSG00000183346, ENSG00000138347, ENSG00000122367, ENSG00000107796, ENSG00000187240, ENSG00000137710, ENSG00000204381, ENSG00000109846, ENSG00000154133, ENSG00000149571, ENSG00000080854, ENSG00000176697, ENSG00000026508, ENSG00000019505, ENSG00000134569, ENSG00000165923, ENSG0000…	CCDC147, ABLIM1, CUBN, KIAA1462, KIF5B, NRP1, RET, C10orf107, MYPN, LDB3, ACTA2, DYNC2H1, RDX, LAYN, CRYAB, ROBO4, KIRREL3, IGSF9B, BDNF, CD44, SYT13, LRP4, AGBL2, SYT7, ROM1, RASGRP2, EHD1, DNHD1, FAM89B, FOSL1, CNIH2, RIN1, FOLR1, RIC3, MTMR2, GABARAPL1, NOS1, WDR66, STX2, PTPRO, FGD4, LRRK2, SLC38A1, RAPGEF3, SCN8A, ACVRL1, KIF5A, AVIL, ANO2, PLEKHG6, SCNN1A, GRIP1, RAB3IP, TPH2, PPFIA2, POC1B…	any
GO:0035239	tube morphogenesis	GO:BP	1.3e-12	944	119	ENSG00000151651, ENSG00000165757, ENSG00000099250, ENSG00000177283, ENSG00000165731, ENSG00000128805, ENSG00000107731, ENSG00000108175, ENSG00000154133, ENSG00000110492, ENSG00000166341, ENSG00000079337, ENSG00000161791, ENSG00000139567, ENSG00000149948, ENSG00000171860, ENSG00000011465, ENSG00000133639, ENSG00000102760, ENSG00000157227, ENSG00000185650, ENSG00000248905, ENSG00000140199, ENSG0000…	ADAM8, KIAA1462, NRP1, FZD8, RET, ARHGAP22, UNC5B, ZMIZ1, ROBO4, MDK, DCHS1, RAPGEF3, FMNL3, ACVRL1, HMGA2, C3AR1, DCN, BTG1, RGCC, MMP14, ZFP36L1, FMN1, SLC12A6, SPINT1, SMAD3, NOX5, ANPEP, ITGAX, IRX3, MMP2, GPR56, SERPINF1, CCL2, JUP, WNK4, CCDC103, HOXB7, SOX9, SPHK1, CCDC40, RNF213, JUNB, MIR27A, MIR23A, TGFB1, CEACAM1, LRG1, C3, VAV3, CSF1, SHC1, PBX1, PRRX1, GLUL, PTGS2, CHI3L1, COL8A2, TI…	upregulated
GO:0010646	regulation of cell communication	GO:BP	1.36e-12	3638	563	ENSG00000107554, ENSG00000138166, ENSG00000198873, ENSG00000066468, ENSG00000019995, ENSG00000151651, ENSG00000150054, ENSG00000095739, ENSG00000165757, ENSG00000107968, ENSG00000170759, ENSG00000099250, ENSG00000177283, ENSG00000165731, ENSG00000128805, ENSG00000198964, ENSG00000107984, ENSG00000072422, ENSG00000122877, ENSG00000122862, ENSG00000099282, ENSG00000107731, ENSG00000156026, ENSG0000…	DNMBP, DUSP5, GRK5, FGFR2, ZRANB1, ADAM8, MPP7, BAMBI, KIAA1462, MAP3K8, KIF5B, NRP1, FZD8, RET, ARHGAP22, SGMS1, DKK1, RHOBTB1, EGR2, SRGN, TSPAN15, UNC5B, MCU, PLAU, ZMIZ1, TSPAN14, ANKRD1, PIK3AP1, ANKRD2, DYNC2H1, RDX, IL18, DKK3, GRIK4, SORL1, UBASH3B, IGSF9B, DUSP8, LGR4, BDNF, CDKN1C, DEPDC7, CD44, PRR5L, LRRC4C, SIGIRR, MDK, LRP4, OR51E2, TRIM6, SYT7, PPP2R5B, FAM89B, CNIH2, RIN1, LRP5, F…	any
GO:2000026	regulation of multicellular organismal development	GO:BP	1.43e-12	2210	374	ENSG00000066468, ENSG00000148848, ENSG00000151651, ENSG00000148803, ENSG00000095739, ENSG00000165757, ENSG00000099250, ENSG00000165731, ENSG00000107984, ENSG00000122862, ENSG00000107738, ENSG00000108175, ENSG00000148677, ENSG00000095587, ENSG00000150782, ENSG00000137642, ENSG00000154127, ENSG00000110693, ENSG00000109854, ENSG00000205213, ENSG00000176697, ENSG00000007372, ENSG00000148948, ENSG0000…	FGFR2, ADAM12, ADAM8, FUOM, BAMBI, KIAA1462, NRP1, RET, DKK1, SRGN, C10orf54, ZMIZ1, ANKRD1, TLL2, IL18, SORL1, UBASH3B, SOX6, HTATIP2, LGR4, BDNF, PAX6, LRRC4C, MDK, LRP4, MYRF, RARRES3, EHD1, PPP2R5B, LTBP3, MTMR2, OAS2, NOS1, MGP, PTPRO, BHLHE41, LRRK2, CNTN1, RAPGEF3, ACVRL1, TESPA1, ERBB3, AVIL, HMGA2, GRIP1, PPFIA2, C3AR1, DUSP6, ATP2B1, DCN, BTG1, NTN4, GAS6, FGF9, ATP8A2, WASF3, CDX2, FLT…	any
GO:0048666	neuron development	GO:BP	1.49e-12	1146	223	ENSG00000151892, ENSG00000066468, ENSG00000151640, ENSG00000170759, ENSG00000099250, ENSG00000165731, ENSG00000107984, ENSG00000122877, ENSG00000138347, ENSG00000107731, ENSG00000148677, ENSG00000154133, ENSG00000149571, ENSG00000176697, ENSG00000007372, ENSG00000148948, ENSG00000110492, ENSG00000134569, ENSG00000110047, ENSG00000068971, ENSG00000110195, ENSG00000087053, ENSG00000139767, ENSG0000…	GFRA1, FGFR2, DPYSL4, KIF5B, NRP1, RET, DKK1, EGR2, MYPN, UNC5B, ANKRD1, ROBO4, KIRREL3, BDNF, PAX6, LRRC4C, MDK, LRP4, EHD1, PPP2R5B, FOLR1, MTMR2, SRRM4, CCDC64, PTPRO, LRRK2, CNTN1, KIF5A, AVIL, GRIP1, PTPRQ, PPFIA2, NTN4, MYO16, ATP8A2, FRY, DCLK1, POSTN, EDNRB, SLITRK1, SLITRK6, FARP1, SPTB, RPS6KA5, CLMN, GABRA5, GABRB3, SEMA6D, GLDN, NPTN, CHRNA3, RASGRF1, SEMA4B, STX1B, DOK4, TUBB3, TUBB3…	any
GO:0040012	regulation of locomotion	GO:BP	1.57e-12	1113	218	ENSG00000151651, ENSG00000165757, ENSG00000099250, ENSG00000165731, ENSG00000072422, ENSG00000107738, ENSG00000156026, ENSG00000122861, ENSG00000137710, ENSG00000076706, ENSG00000137642, ENSG00000154133, ENSG00000133818, ENSG00000185885, ENSG00000007372, ENSG00000135362, ENSG00000110492, ENSG00000149781, ENSG00000176973, ENSG00000151490, ENSG00000188906, ENSG00000139567, ENSG00000065361, ENSG0000…	ADAM8, KIAA1462, NRP1, RET, RHOBTB1, C10orf54, MCU, PLAU, RDX, MCAM, SORL1, ROBO4, RRAS2, IFITM1, PAX6, PRR5L, MDK, FERMT3, FAM89B, PTPRO, LRRK2, ACVRL1, ERBB3, PTPRR, C3AR1, DCN, GAS6, FGF9, FLT1, POSTN, RGCC, GPR18, MMP14, AJUBA, RIPK3, BMP4, LGALS3, LGMN, TJP1, THBS1, SEMA6D, FGF7, TPM1, DAPK2, SMAD3, IL16, SEMA4B, NR2F2, IGF1R, CORO1A, PYCARD, ITGAX, NKD1, GPR56, MARVELD3, SERPINF1, LGALS9, C…	any
GO:0009888	tissue development	GO:BP	1.6e-12	2118	211	ENSG00000138166, ENSG00000187908, ENSG00000099250, ENSG00000165731, ENSG00000107984, ENSG00000165471, ENSG00000150347, ENSG00000122877, ENSG00000137745, ENSG00000026508, ENSG00000110492, ENSG00000134569, ENSG00000133321, ENSG00000168056, ENSG00000166340, ENSG00000166341, ENSG00000062282, ENSG00000134531, ENSG00000079337, ENSG00000139567, ENSG00000170454, ENSG00000135424, ENSG00000166886, ENSG0000…	DUSP5, DMBT1, NRP1, RET, DKK1, MBL2, ARID5B, EGR2, MMP13, CD44, MDK, LRP4, RARRES3, LTBP3, TPP1, DCHS1, DGAT2, EMP1, RAPGEF3, ACVRL1, KRT75, ITGA7, NAB2, STAC3, HMGA2, ATP2B1, DCN, BTG1, TNFRSF19, POSTN, RGCC, EDNRB, SLITRK6, GPC6, CRIP1, MMP14, LGALS3, ZFP36L1, FOS, FMN1, SPINT1, SEMA6D, FGF7, WDR72, SMAD3, SEMA4B, ITGAX, PPL, IRX3, MMP2, PARD6A, HYDIN, CCDC78, ATP2C2, TUBB3, ALDOC, KRTAP1-5, KR…	upregulated
GO:0023052	signaling	GO:BP	1.65e-12	6772	950	ENSG00000107554, ENSG00000108018, ENSG00000138166, ENSG00000107518, ENSG00000151892, ENSG00000198873, ENSG00000203805, ENSG00000066468, ENSG00000019995, ENSG00000068383, ENSG00000151651, ENSG00000148484, ENSG00000099246, ENSG00000150054, ENSG00000095739, ENSG00000165757, ENSG00000107968, ENSG00000170759, ENSG00000099250, ENSG00000177283, ENSG00000165731, ENSG00000204174, ENSG00000128805, ENSG0000…	DNMBP, SORCS1, DUSP5, ATRNL1, GFRA1, GRK5, PPAPDC1A, FGFR2, ZRANB1, INPP5A, ADAM8, RSU1, RAB18, MPP7, BAMBI, KIAA1462, MAP3K8, KIF5B, NRP1, FZD8, RET, NPY4R, ARHGAP22, SGMS1, DKK1, RHOBTB1, ARID5B, EGR2, SRGN, TSPAN15, UNC5B, MCU, PLAU, ZMIZ1, TSPAN14, ANKRD1, PIK3AP1, ANKRD2, DYNC2H1, RDX, CRYAB, IL18, DKK3, GRIK4, SORL1, UBASH3B, IGSF9B, RRAS2, DUSP8, LSP1, TSPAN32, FIBIN, LGR4, BDNF, CDKN1C, I…	any
GO:0030155	regulation of cell adhesion	GO:BP	1.96e-12	721	99	ENSG00000151651, ENSG00000099250, ENSG00000165731, ENSG00000122861, ENSG00000108175, ENSG00000026508, ENSG00000110492, ENSG00000149781, ENSG00000111252, ENSG00000139567, ENSG00000135426, ENSG00000102524, ENSG00000133110, ENSG00000102760, ENSG00000157227, ENSG00000131981, ENSG00000248905, ENSG00000166949, ENSG00000102879, ENSG00000103490, ENSG00000205336, ENSG00000168961, ENSG00000108691, ENSG0000…	ADAM8, NRP1, RET, PLAU, ZMIZ1, CD44, MDK, FERMT3, SH2B3, ACVRL1, TESPA1, TNFSF13B, POSTN, RGCC, MMP14, LGALS3, FMN1, SMAD3, CORO1A, PYCARD, GPR56, LGALS9, CCL2, JUP, SOX9, MIR27A, TGFB1, CEACAM1, VCAM1, VAV3, CSF1, PTPN22, MUC1, KIFAP3, TNFSF18, TNFSF4, PTPRC, NID1, PTPRU, IL23R, BCL10, CYR61, RIN2, FOXA2, TGM2, ADA, PREX1, BMP2, RAC2, MAP4K4, CYTIP, DPP4, ITGA4, FN1, SERPINE2, EMILIN1, ABI3BP, N…	upregulated
GO:2000145	regulation of cell motility	GO:BP	1.98e-12	1042	207	ENSG00000151651, ENSG00000165757, ENSG00000099250, ENSG00000165731, ENSG00000072422, ENSG00000107738, ENSG00000156026, ENSG00000122861, ENSG00000137710, ENSG00000076706, ENSG00000137642, ENSG00000154133, ENSG00000133818, ENSG00000185885, ENSG00000007372, ENSG00000135362, ENSG00000110492, ENSG00000149781, ENSG00000176973, ENSG00000139567, ENSG00000065361, ENSG00000153233, ENSG00000171860, ENSG0000…	ADAM8, KIAA1462, NRP1, RET, RHOBTB1, C10orf54, MCU, PLAU, RDX, MCAM, SORL1, ROBO4, RRAS2, IFITM1, PAX6, PRR5L, MDK, FERMT3, FAM89B, ACVRL1, ERBB3, PTPRR, C3AR1, DCN, GAS6, FGF9, FLT1, POSTN, RGCC, GPR18, MMP14, AJUBA, RIPK3, BMP4, LGALS3, LGMN, TJP1, THBS1, SEMA6D, FGF7, TPM1, DAPK2, SMAD3, SEMA4B, NR2F2, IGF1R, CORO1A, PYCARD, ITGAX, NKD1, GPR56, MARVELD3, SERPINF1, LGALS9, CCL2, GRB7, JUP, STAT…	any
GO:0016477	cell migration	GO:BP	2.24e-12	1620	173	ENSG00000151651, ENSG00000165757, ENSG00000099250, ENSG00000165731, ENSG00000150347, ENSG00000122861, ENSG00000149564, ENSG00000154133, ENSG00000185885, ENSG00000026508, ENSG00000110492, ENSG00000149781, ENSG00000176973, ENSG00000166341, ENSG00000110900, ENSG00000188906, ENSG00000161791, ENSG00000139567, ENSG00000139626, ENSG00000171860, ENSG00000011465, ENSG00000133639, ENSG00000133110, ENSG0000…	ADAM8, KIAA1462, NRP1, RET, ARID5B, PLAU, ESAM, ROBO4, IFITM1, CD44, MDK, FERMT3, FAM89B, DCHS1, TSPAN11, LRRK2, FMNL3, ACVRL1, ITGB7, C3AR1, DCN, BTG1, POSTN, RGCC, EDNRB, GPC6, GPR18, MMP14, SLC7A8, EFS, RIPK3, LGALS3, SEMA6D, FGF7, DYX1C1, DAPK2, SMAD3, SEMA4B, CORO1A, HSD3B7, PYCARD, ITGAX, GPR56, SERPINF1, LGALS9, CORO6, CCL2, GRB7, JUP, STAT5A, FMNL1, SPNS2, ACE, SOX9, SPHK1, CYGB, FSCN2, A…	upregulated
GO:0031175	neuron projection development	GO:BP	2.31e-12	1017	203	ENSG00000151892, ENSG00000066468, ENSG00000151640, ENSG00000170759, ENSG00000099250, ENSG00000165731, ENSG00000107984, ENSG00000122877, ENSG00000138347, ENSG00000107731, ENSG00000148677, ENSG00000154133, ENSG00000149571, ENSG00000176697, ENSG00000007372, ENSG00000148948, ENSG00000110492, ENSG00000134569, ENSG00000110047, ENSG00000068971, ENSG00000110195, ENSG00000135127, ENSG00000151490, ENSG0000…	GFRA1, FGFR2, DPYSL4, KIF5B, NRP1, RET, DKK1, EGR2, MYPN, UNC5B, ANKRD1, ROBO4, KIRREL3, BDNF, PAX6, LRRC4C, MDK, LRP4, EHD1, PPP2R5B, FOLR1, CCDC64, PTPRO, LRRK2, CNTN1, KIF5A, AVIL, GRIP1, PPFIA2, NTN4, MYO16, ATP8A2, FRY, DCLK1, POSTN, SLITRK1, SLITRK6, FARP1, SPTB, RPS6KA5, CLMN, SEMA6D, NPTN, CHRNA3, RASGRF1, SEMA4B, STX1B, DOK4, TUBB3, TUBB3, PMP22, SCARF1, SERPINF1, ULK2, OMG, GRB7, GFAP, …	any
GO:0043292	contractile fiber	GO:CC	2.33e-12	240	49	ENSG00000078114, ENSG00000122367, ENSG00000107796, ENSG00000148677, ENSG00000165887, ENSG00000109846, ENSG00000196876, ENSG00000196465, ENSG00000165410, ENSG00000073712, ENSG00000072110, ENSG00000159251, ENSG00000128872, ENSG00000138594, ENSG00000263155, ENSG00000140416, ENSG00000182253, ENSG00000133020, ENSG00000109061, ENSG00000125414, ENSG00000109063, ENSG00000101605, ENSG00000101608, ENSG0000…	NEBL, LDB3, ACTA2, ANKRD1, ANKRD2, CRYAB, SCN8A, MYL6B, CFL2, FERMT2, ACTN1, ACTC1, TMOD2, TMOD3, MYZAP, TPM1, SYNM, MYH8, MYH1, MYH2, MYH3, MYOM1, MYL12A, MYL12B, FHOD3, TNNT2, TNNI1, CSRP1, LMOD1, PDE4B, NEXN, MYL9, JPH2, MYL1, SLC8A1, CALM2, TNNC1, SYNPO2, MYOZ2, SORBS2, PDLIM7, FLNC, CALD1, DNAJB6, PDLIM2, JPH1, TPM2, PGM5, HABP4	downregulated
GO:0016020	membrane	GO:CC	2.35e-12	9731	1298	ENSG00000099194, ENSG00000108018, ENSG00000197142, ENSG00000107518, ENSG00000151892, ENSG00000198873, ENSG00000203805, ENSG00000066468, ENSG00000187908, ENSG00000182022, ENSG00000148848, ENSG00000170430, ENSG00000068383, ENSG00000151651, ENSG00000107611, ENSG00000165996, ENSG00000148483, ENSG00000204740, ENSG00000120594, ENSG00000099246, ENSG00000150054, ENSG00000095739, ENSG00000165757, ENSG0000…	SCD, SORCS1, ACSL5, ATRNL1, GFRA1, GRK5, PPAPDC1A, FGFR2, DMBT1, CHST15, ADAM12, MGMT, INPP5A, ADAM8, CUBN, PTPLA, TMEM236, MALRD1, PLXDC2, RAB18, MPP7, BAMBI, KIAA1462, KIF5B, NRP1, FZD8, RET, SYT15, NPY4R, FRMPD2, SGMS1, DKK1, RHOBTB1, MYPN, TSPAN15, C10orf35, UNC5B, C10orf54, CHST3, MCU, PLAU, TSPAN14, SLC16A12, SLC35G1, PIK3AP1, HOGA1, DYNC2H1, RNF141, MRVI1, C11orf87, RDX, LAYN, CRYAB, CADM1…	any
GO:0007154	cell communication	GO:BP	2.52e-12	6798	952	ENSG00000107554, ENSG00000108018, ENSG00000138166, ENSG00000107518, ENSG00000151892, ENSG00000198873, ENSG00000203805, ENSG00000066468, ENSG00000019995, ENSG00000068383, ENSG00000151651, ENSG00000148484, ENSG00000099246, ENSG00000150054, ENSG00000095739, ENSG00000165757, ENSG00000107968, ENSG00000170759, ENSG00000099250, ENSG00000177283, ENSG00000165731, ENSG00000204174, ENSG00000128805, ENSG0000…	DNMBP, SORCS1, DUSP5, ATRNL1, GFRA1, GRK5, PPAPDC1A, FGFR2, ZRANB1, INPP5A, ADAM8, RSU1, RAB18, MPP7, BAMBI, KIAA1462, MAP3K8, KIF5B, NRP1, FZD8, RET, NPY4R, ARHGAP22, SGMS1, DKK1, RHOBTB1, ARID5B, EGR2, SRGN, TSPAN15, UNC5B, MCU, PLAU, ZMIZ1, TSPAN14, ANKRD1, PIK3AP1, ANKRD2, DYNC2H1, RDX, CRYAB, IL18, DKK3, GRIK4, SORL1, UBASH3B, IGSF9B, RRAS2, DUSP8, LSP1, TSPAN32, FIBIN, LGR4, BDNF, CDKN1C, I…	any
GO:0030017	sarcomere	GO:CC	2.66e-12	207	45	ENSG00000078114, ENSG00000122367, ENSG00000148677, ENSG00000165887, ENSG00000109846, ENSG00000196876, ENSG00000165410, ENSG00000073712, ENSG00000072110, ENSG00000159251, ENSG00000128872, ENSG00000138594, ENSG00000263155, ENSG00000140416, ENSG00000133020, ENSG00000109061, ENSG00000125414, ENSG00000109063, ENSG00000101605, ENSG00000101608, ENSG00000118680, ENSG00000134775, ENSG00000118194, ENSG0000…	NEBL, LDB3, ANKRD1, ANKRD2, CRYAB, SCN8A, CFL2, FERMT2, ACTN1, ACTC1, TMOD2, TMOD3, MYZAP, TPM1, MYH8, MYH1, MYH2, MYH3, MYOM1, MYL12A, MYL12B, FHOD3, TNNT2, TNNI1, CSRP1, LMOD1, PDE4B, NEXN, MYL9, JPH2, MYL1, SLC8A1, CALM2, TNNC1, SYNPO2, MYOZ2, SORBS2, PDLIM7, FLNC, DNAJB6, PDLIM2, JPH1, TPM2, PGM5, HABP4	downregulated
GO:0022603	regulation of anatomical structure morphogenesis	GO:BP	3.14e-12	1194	229	ENSG00000107554, ENSG00000066468, ENSG00000019995, ENSG00000148848, ENSG00000095739, ENSG00000165757, ENSG00000099250, ENSG00000165731, ENSG00000107984, ENSG00000072422, ENSG00000156026, ENSG00000137710, ENSG00000109854, ENSG00000205213, ENSG00000176697, ENSG00000026508, ENSG00000148948, ENSG00000110492, ENSG00000134569, ENSG00000110047, ENSG00000151490, ENSG00000139132, ENSG00000188906, ENSG0000…	DNMBP, FGFR2, ZRANB1, ADAM12, BAMBI, KIAA1462, NRP1, RET, DKK1, RHOBTB1, MCU, RDX, HTATIP2, LGR4, BDNF, CD44, LRRC4C, MDK, LRP4, EHD1, PTPRO, FGD4, LRRK2, RAPGEF3, FMNL3, ACVRL1, ITGA7, HMGA2, GRIP1, PPFIA2, C3AR1, DCN, BTG1, NTN4, TNFSF13B, WASF3, CDX2, FLT1, POSTN, RGCC, SLITRK1, GPC6, FERMT2, BMP4, SYNE3, ATP10A, TJP1, THBS1, SEMA6D, FGF7, TPM1, CHRNA3, SEMA4B, CORO1A, ITGAX, NKD1, PARD6A, SER…	any
GO:0023051	regulation of signaling	GO:BP	3.71e-12	3679	566	ENSG00000107554, ENSG00000138166, ENSG00000198873, ENSG00000066468, ENSG00000019995, ENSG00000151651, ENSG00000150054, ENSG00000095739, ENSG00000165757, ENSG00000107968, ENSG00000170759, ENSG00000099250, ENSG00000177283, ENSG00000165731, ENSG00000128805, ENSG00000198964, ENSG00000107984, ENSG00000072422, ENSG00000122877, ENSG00000122862, ENSG00000099282, ENSG00000107731, ENSG00000156026, ENSG0000…	DNMBP, DUSP5, GRK5, FGFR2, ZRANB1, ADAM8, MPP7, BAMBI, KIAA1462, MAP3K8, KIF5B, NRP1, FZD8, RET, ARHGAP22, SGMS1, DKK1, RHOBTB1, EGR2, SRGN, TSPAN15, UNC5B, MCU, PLAU, ZMIZ1, TSPAN14, ANKRD1, PIK3AP1, ANKRD2, DYNC2H1, RDX, IL18, DKK3, GRIK4, SORL1, UBASH3B, IGSF9B, DUSP8, LGR4, BDNF, CDKN1C, DEPDC7, CD44, PRR5L, LRRC4C, SIGIRR, MDK, LRP4, OR51E2, TRIM6, SYT7, PPP2R5B, FAM89B, CNIH2, RIN1, LRP5, F…	any
GO:0048513	animal organ development	GO:BP	3.71e-12	3677	319	ENSG00000151651, ENSG00000099250, ENSG00000177283, ENSG00000067082, ENSG00000165731, ENSG00000165512, ENSG00000107984, ENSG00000165471, ENSG00000150347, ENSG00000122877, ENSG00000108175, ENSG00000137745, ENSG00000187240, ENSG00000050165, ENSG00000151702, ENSG00000026508, ENSG00000110492, ENSG00000134569, ENSG00000149489, ENSG00000133321, ENSG00000168062, ENSG00000168056, ENSG00000175592, ENSG0000…	ADAM8, NRP1, FZD8, KLF6, RET, ZNF22, DKK1, MBL2, ARID5B, EGR2, ZMIZ1, MMP13, DYNC2H1, DKK3, FLI1, CD44, MDK, LRP4, ROM1, RARRES3, BATF2, LTBP3, FOSL1, DCHS1, DGAT2, SH2B3, OAS2, LRRK2, ACVRL1, KRT75, TESPA1, ITGA7, NAB2, STAC3, LRIG3, HMGA2, LIN7A, DUSP6, ATP2B1, DCN, TNFRSF19, RGCC, EDNRB, SLITRK6, GPC6, GPR18, CRIP2, CRIP1, MMP14, REC8, RIPK3, LGALS3, ZFP36L1, SMOC1, FOS, GPR68, FMN1, SPINT1, S…	upregulated
GO:0030182	neuron differentiation	GO:BP	3.98e-12	1409	260	ENSG00000151892, ENSG00000066468, ENSG00000151640, ENSG00000148803, ENSG00000170759, ENSG00000099250, ENSG00000177283, ENSG00000165731, ENSG00000107984, ENSG00000122877, ENSG00000138347, ENSG00000107731, ENSG00000148677, ENSG00000187240, ENSG00000154133, ENSG00000149571, ENSG00000176697, ENSG00000007372, ENSG00000148948, ENSG00000110492, ENSG00000134569, ENSG00000149489, ENSG00000110047, ENSG0000…	GFRA1, FGFR2, DPYSL4, FUOM, KIF5B, NRP1, FZD8, RET, DKK1, EGR2, MYPN, UNC5B, ANKRD1, DYNC2H1, ROBO4, KIRREL3, BDNF, PAX6, LRRC4C, MDK, LRP4, ROM1, EHD1, PPP2R5B, FOLR1, MTMR2, SRRM4, CCDC64, PTPRO, LRRK2, CNTN1, KIF5A, AVIL, GRIP1, PTPRQ, PPFIA2, NTN4, MYO16, ATP8A2, FRY, DCLK1, POSTN, EDNRB, SLITRK1, SLITRK6, FARP1, MDGA2, BMP4, SPTB, RPS6KA5, CLMN, GABRA5, GABRB3, SEMA6D, GLDN, NPTN, CHRNA3, RA…	any
GO:0022604	regulation of cell morphogenesis	GO:BP	6.74e-12	508	121	ENSG00000107554, ENSG00000019995, ENSG00000095739, ENSG00000099250, ENSG00000165731, ENSG00000072422, ENSG00000137710, ENSG00000176697, ENSG00000026508, ENSG00000148948, ENSG00000110492, ENSG00000134569, ENSG00000151490, ENSG00000139132, ENSG00000188906, ENSG00000161791, ENSG00000135424, ENSG00000155974, ENSG00000139220, ENSG00000132970, ENSG00000133110, ENSG00000178235, ENSG00000073712, ENSG0000…	DNMBP, ZRANB1, BAMBI, NRP1, RET, RHOBTB1, RDX, BDNF, CD44, LRRC4C, MDK, LRP4, PTPRO, FGD4, LRRK2, FMNL3, ITGA7, GRIP1, PPFIA2, WASF3, POSTN, SLITRK1, FERMT2, SYNE3, ATP10A, SEMA6D, TPM1, CHRNA3, SEMA4B, CORO1A, ULK2, OMG, CCL2, FMNL1, SLC9A3R1, UNC13D, MYH10, NTN1, CDH2, MYL12A, MYL12B, EPB41L3, WTIP, APOE, SEMA6B, MYH14, LRRC4B, CACNG7, CDC42EP5, PALM, PALMD, AMIGO1, NGF, DRAXIN, PDPN, CHRNB2, E…	any
GO:0030016	myofibril	GO:CC	6.75e-12	229	47	ENSG00000078114, ENSG00000122367, ENSG00000148677, ENSG00000165887, ENSG00000109846, ENSG00000196876, ENSG00000165410, ENSG00000073712, ENSG00000072110, ENSG00000159251, ENSG00000128872, ENSG00000138594, ENSG00000263155, ENSG00000140416, ENSG00000182253, ENSG00000133020, ENSG00000109061, ENSG00000125414, ENSG00000109063, ENSG00000101605, ENSG00000101608, ENSG00000118680, ENSG00000134775, ENSG0000…	NEBL, LDB3, ANKRD1, ANKRD2, CRYAB, SCN8A, CFL2, FERMT2, ACTN1, ACTC1, TMOD2, TMOD3, MYZAP, TPM1, SYNM, MYH8, MYH1, MYH2, MYH3, MYOM1, MYL12A, MYL12B, FHOD3, TNNT2, TNNI1, CSRP1, LMOD1, PDE4B, NEXN, MYL9, JPH2, MYL1, SLC8A1, CALM2, TNNC1, SYNPO2, MYOZ2, SORBS2, PDLIM7, FLNC, CALD1, DNAJB6, PDLIM2, JPH1, TPM2, PGM5, HABP4	downregulated
GO:0062023	collagen-containing extracellular matrix	GO:CC	8.03e-12	407	66	ENSG00000165471, ENSG00000110492, ENSG00000149131, ENSG00000149506, ENSG00000168056, ENSG00000011465, ENSG00000175899, ENSG00000133110, ENSG00000183098, ENSG00000131981, ENSG00000198732, ENSG00000119681, ENSG00000197249, ENSG00000087245, ENSG00000132386, ENSG00000168961, ENSG00000132205, ENSG00000130513, ENSG00000105329, ENSG00000187244, ENSG00000179403, ENSG00000196154, ENSG00000169231, ENSG0000…	MBL2, MDK, SERPING1, ZP1, LTBP3, DCN, A2M, POSTN, GPC6, LGALS3, SMOC1, LTBP2, SERPINA1, MMP2, SERPINF1, LGALS9, EMILIN2, GDF15, TGFB1, BCAM, VWA1, S100A4, THBS3, LAMB3, NID1, COL8A2, CYR61, TGM2, EMILIN3, COL6A1, COL6A2, TMEFF2, FN1, SERPINE2, COL6A3, EMILIN1, ABI3BP, COLQ, ITIH4, FGB, FGG, TGFBI, HAPLN1, LAMA4, COL10A1, LAMA2, THBS2, TNXB, F13A1, EYS, PCOLCE, LAMB4, COL28A1, CTHRC1, CTSB, NOV, S…	upregulated
GO:0048856	anatomical structure development	GO:BP	8.04e-12	6105	468	ENSG00000099204, ENSG00000107518, ENSG00000203805, ENSG00000066468, ENSG00000019995, ENSG00000148848, ENSG00000170430, ENSG00000151640, ENSG00000165996, ENSG00000078114, ENSG00000099246, ENSG00000095739, ENSG00000170759, ENSG00000072422, ENSG00000122862, ENSG00000107738, ENSG00000156026, ENSG00000122367, ENSG00000198682, ENSG00000107796, ENSG00000148677, ENSG00000095587, ENSG00000165887, ENSG0000…	ABLIM1, ATRNL1, PPAPDC1A, FGFR2, ZRANB1, ADAM12, MGMT, DPYSL4, PTPLA, NEBL, RAB18, BAMBI, KIF5B, RHOBTB1, SRGN, C10orf54, MCU, LDB3, PAPSS2, ACTA2, ANKRD1, TLL2, ANKRD2, RDX, CRYAB, IL18, PTS, CADM1, TAGLN, MCAM, SORL1, UBASH3B, KIRREL3, SOX6, HTATIP2, LGR4, BDNF, PAX6, PKP3, EHD1, PPP2R5B, CST6, LRP5, FOLR1, MTMR2, CNTN5, TXNRD1, SRRM4, CCDC64, MSI1, STX2, MGP, PTPRO, FGD4, PKP2, ABCD2, CNTN1, S…	downregulated
GO:0048646	anatomical structure formation involved in morphogenesis	GO:BP	9.96e-12	1206	229	ENSG00000138166, ENSG00000066468, ENSG00000148848, ENSG00000151651, ENSG00000078114, ENSG00000165757, ENSG00000099250, ENSG00000177283, ENSG00000165731, ENSG00000128805, ENSG00000107984, ENSG00000122877, ENSG00000138347, ENSG00000107731, ENSG00000122367, ENSG00000148677, ENSG00000150782, ENSG00000076706, ENSG00000154133, ENSG00000109854, ENSG00000007372, ENSG00000110492, ENSG00000110047, ENSG0000…	DUSP5, FGFR2, ADAM12, ADAM8, NEBL, KIAA1462, NRP1, FZD8, RET, ARHGAP22, DKK1, EGR2, MYPN, UNC5B, LDB3, ANKRD1, IL18, MCAM, ROBO4, HTATIP2, PAX6, MDK, EHD1, DCHS1, FOLR1, MTMR2, TXNRD1, NOS1, RAPGEF3, FMNL3, ACVRL1, ITGA7, HMGA2, C3AR1, DCN, BTG1, TNFSF13B, FGF9, ATP8A2, CDX2, FLT1, RGCC, KLF5, MMP14, CFL2, BMP4, MPP5, ACTN1, TJP1, FMN1, SLC12A6, ACTC1, THBS1, SPINT1, TMOD2, TMOD3, WDR72, TPM1, SM…	any
GO:0003779	actin binding	GO:MF	1.92e-11	433	68	ENSG00000099204, ENSG00000078114, ENSG00000122367, ENSG00000137710, ENSG00000149591, ENSG00000139354, ENSG00000139132, ENSG00000177425, ENSG00000041515, ENSG00000132970, ENSG00000136167, ENSG00000139734, ENSG00000129474, ENSG00000165410, ENSG00000073712, ENSG00000070182, ENSG00000072110, ENSG00000165959, ENSG00000128872, ENSG00000138594, ENSG00000140416, ENSG00000103187, ENSG00000133020, ENSG0000…	ABLIM1, NEBL, LDB3, RDX, TAGLN, GAS2L3, FGD4, PAWR, MYO16, WASF3, LCP1, DIAPH3, AJUBA, CFL2, FERMT2, SPTB, ACTN1, CLMN, TMOD2, TMOD3, TPM1, COTL1, MYH8, MYH1, MYH2, MYH3, MYH10, MYOM1, FHOD3, EPB41L3, CNN1, GIPC1, MYH14, CAMSAP3, CGN, ARPC5, TNNT2, TNNI1, LMOD1, NEXN, GBP1, CNN3, DSTN, SNTA1, MYO7B, PLS1, TNNC1, SYNPO2, MYOZ2, KLHL5, LIMCH1, PDLIM7, RAI14, ENC1, EPB41L2, PHACTR2, EZR, CAP2, DAAM2…	downregulated
GO:0072359	circulatory system development	GO:BP	2.21e-11	1194	226	ENSG00000066468, ENSG00000148848, ENSG00000151651, ENSG00000078114, ENSG00000165757, ENSG00000099250, ENSG00000177283, ENSG00000128805, ENSG00000107984, ENSG00000107731, ENSG00000108175, ENSG00000122367, ENSG00000107796, ENSG00000148677, ENSG00000187240, ENSG00000150782, ENSG00000076706, ENSG00000154133, ENSG00000110693, ENSG00000109854, ENSG00000007372, ENSG00000110492, ENSG00000149489, ENSG0000…	FGFR2, ADAM12, ADAM8, NEBL, KIAA1462, NRP1, FZD8, ARHGAP22, DKK1, UNC5B, ZMIZ1, LDB3, ACTA2, ANKRD1, DYNC2H1, IL18, MCAM, ROBO4, SOX6, HTATIP2, PAX6, MDK, ROM1, FOSL1, DCHS1, LRP5, FOLR1, PKP2, RAPGEF3, FMNL3, ACVRL1, ERBB3, HMGA2, C3AR1, DUSP6, DCN, BTG1, FGF9, CDX2, FLT1, RGCC, KLF5, CRIP1, MMP14, BMP4, ZFP36L1, TJP1, SLC12A6, ACTC1, THBS1, SPINT1, DYX1C1, TPM1, SMAD3, NOX5, ALPK3, ACAN, ANPEP,…	any
GO:0048731	system development	GO:BP	3.53e-11	5020	398	ENSG00000099204, ENSG00000107518, ENSG00000066468, ENSG00000148848, ENSG00000170430, ENSG00000151640, ENSG00000078114, ENSG00000099246, ENSG00000095739, ENSG00000170759, ENSG00000122862, ENSG00000107738, ENSG00000122367, ENSG00000198682, ENSG00000107796, ENSG00000148677, ENSG00000095587, ENSG00000165887, ENSG00000109846, ENSG00000150782, ENSG00000150787, ENSG00000149591, ENSG00000076706, ENSG0000…	ABLIM1, ATRNL1, FGFR2, ADAM12, MGMT, DPYSL4, NEBL, RAB18, BAMBI, KIF5B, SRGN, C10orf54, LDB3, PAPSS2, ACTA2, ANKRD1, TLL2, ANKRD2, CRYAB, IL18, PTS, TAGLN, MCAM, SORL1, UBASH3B, KIRREL3, SOX6, HTATIP2, LGR4, BDNF, PAX6, PKP3, EHD1, PPP2R5B, LRP5, FOLR1, MTMR2, CNTN5, SRRM4, CCDC64, MSI1, STX2, MGP, PTPRO, PKP2, ABCD2, CNTN1, SCN8A, KRT80, KRT86, KRT81, HOXC13, ERBB3, MYL6B, MYL6, GRIP1, PTPRQ, MF…	downregulated
GO:0032879	regulation of localization	GO:BP	3.57e-11	2942	265	ENSG00000151651, ENSG00000165757, ENSG00000099250, ENSG00000165731, ENSG00000107984, ENSG00000165471, ENSG00000122861, ENSG00000154133, ENSG00000198168, ENSG00000185885, ENSG00000019505, ENSG00000110492, ENSG00000134569, ENSG00000011347, ENSG00000124942, ENSG00000149781, ENSG00000176973, ENSG00000174871, ENSG00000122986, ENSG00000111335, ENSG00000089250, ENSG00000151062, ENSG00000188906, ENSG0000…	ADAM8, KIAA1462, NRP1, RET, DKK1, MBL2, PLAU, ROBO4, SVIP, IFITM1, SYT13, MDK, LRP4, SYT7, AHNAK, FERMT3, FAM89B, CNIH2, HVCN1, OAS2, NOS1, CACNA2D4, LRRK2, RAPGEF3, ACVRL1, STAC3, PPFIA2, C3AR1, ATP2B1, DCN, POSTN, RGCC, EDNRB, GPC6, CLDN10, GPR18, MMP14, RIPK3, LGALS3, ZFP36L1, GPR68, IFI27, SEMA6D, FGF7, DAPK2, SMAD3, CHRNA3, ABHD17C, NMB, SEMA4B, MCTP2, SSTR5, MPV17L, RAB26, PRRT2, CORO1A, ST…	upregulated
GO:0051241	negative regulation of multicellular organismal process	GO:BP	3.7e-11	1358	249	ENSG00000148803, ENSG00000099250, ENSG00000107984, ENSG00000122862, ENSG00000107738, ENSG00000122861, ENSG00000184719, ENSG00000095587, ENSG00000137642, ENSG00000154127, ENSG00000110693, ENSG00000205213, ENSG00000176697, ENSG00000007372, ENSG00000185187, ENSG00000110492, ENSG00000134569, ENSG00000149131, ENSG00000168056, ENSG00000162337, ENSG00000087053, ENSG00000008405, ENSG00000111252, ENSG0000…	FUOM, NRP1, DKK1, SRGN, C10orf54, PLAU, RNLS, TLL2, SORL1, UBASH3B, SOX6, LGR4, BDNF, PAX6, SIGIRR, MDK, LRP4, SERPING1, LTBP3, LRP5, MTMR2, CRY1, SH2B3, PTPRO, C12orf39, ABCD2, LRRK2, ACVRL1, PTPRR, TSPAN8, ATP2B1, DCN, GAS6, FGF9, RGCC, EDNRB, GPR18, NDRG2, BMP4, ZFP36L1, RPS6KA5, GPR68, LGMN, THBS1, SEMA6D, SMAD3, NPTN, SEMA4B, NR2F2, STX1B, PYCARD, IRX3, GPR56, MARVELD3, ABAT, MC1R, PMP22, AD…	any
GO:0043292	contractile fiber	GO:CC	4.03e-11	240	70	ENSG00000078114, ENSG00000138347, ENSG00000122367, ENSG00000107796, ENSG00000148677, ENSG00000165887, ENSG00000109846, ENSG00000124942, ENSG00000089250, ENSG00000196876, ENSG00000196465, ENSG00000185567, ENSG00000165410, ENSG00000073712, ENSG00000072110, ENSG00000159251, ENSG00000128872, ENSG00000138594, ENSG00000263155, ENSG00000140416, ENSG00000182253, ENSG00000087245, ENSG00000133020, ENSG0000…	NEBL, MYPN, LDB3, ACTA2, ANKRD1, ANKRD2, CRYAB, AHNAK, NOS1, SCN8A, MYL6B, AHNAK2, CFL2, FERMT2, ACTN1, ACTC1, TMOD2, TMOD3, MYZAP, TPM1, SYNM, MMP2, MYH8, MYH1, MYH2, MYH3, JUP, MYOM1, MYL12A, MYL12B, FHOD3, NOS1AP, TNNT2, TNNI1, CSRP1, LMOD1, ACTN2, PDE4B, NEXN, MYL9, JPH2, SCN1A, XIRP2, KLHL41, MYL1, FKBP1B, TRIM54, SLC8A1, CALM2, MYH15, TIMP4, SCN5A, TNNC1, PPP3CA, SYNPO2, MYOZ2, PDLIM3, SORB…	any
GO:0006954	inflammatory response	GO:BP	4.77e-11	780	101	ENSG00000151651, ENSG00000165471, ENSG00000026508, ENSG00000185187, ENSG00000110492, ENSG00000188906, ENSG00000171860, ENSG00000139187, ENSG00000136160, ENSG00000170345, ENSG00000100784, ENSG00000119714, ENSG00000197249, ENSG00000168398, ENSG00000166949, ENSG00000213658, ENSG00000008516, ENSG00000103490, ENSG00000170425, ENSG00000132386, ENSG00000168961, ENSG00000108691, ENSG00000196689, ENSG0000…	ADAM8, MBL2, CD44, SIGIRR, MDK, LRRK2, C3AR1, KLRG1, EDNRB, FOS, RPS6KA5, GPR68, SERPINA1, BDKRB2, SMAD3, LAT, MMP25, PYCARD, ADORA2B, SERPINF1, LGALS9, CCL2, TRPV1, NR1D1, SPHK1, CD68, ACP5, EMR2, CYP4F11, ZFP36, TGFB1, RELB, C5AR2, C3, CSF1, TNFRSF4, TNFRSF1B, IFI16, FCER1G, TNFSF4, PTGS2, PTPRC, CHI3L1, IL23R, PTGFR, TGM2, ADA, BMP2, GGT1, APOL3, TNFAIP6, CALCRL, FN1, SLC11A1, SCG2, UCN, NFKBI…	upregulated
GO:0050793	regulation of developmental process	GO:BP	5.31e-11	2779	253	ENSG00000107554, ENSG00000151651, ENSG00000148803, ENSG00000165757, ENSG00000099250, ENSG00000165731, ENSG00000107984, ENSG00000108175, ENSG00000185885, ENSG00000026508, ENSG00000148948, ENSG00000110492, ENSG00000134569, ENSG00000124920, ENSG00000133317, ENSG00000133321, ENSG00000168056, ENSG00000111335, ENSG00000089250, ENSG00000123095, ENSG00000188906, ENSG00000079337, ENSG00000186897, ENSG0000…	DNMBP, ADAM8, FUOM, KIAA1462, NRP1, RET, DKK1, ZMIZ1, IFITM1, CD44, LRRC4C, MDK, LRP4, MYRF, LGALS12, RARRES3, LTBP3, OAS2, NOS1, BHLHE41, LRRK2, RAPGEF3, C1QL4, FMNL3, ACVRL1, TESPA1, ITGA7, NAB2, AVIL, HMGA2, PPFIA2, C3AR1, DUSP6, ATP2B1, DCN, BTG1, TNFSF13B, POSTN, RGCC, EDNRB, SLITRK1, SLITRK6, GPC6, MMP14, LGALS3, ZFP36L1, SMOC1, FOS, GPR68, SYNE3, SPINT1, SEMA6D, FGF7, SMAD3, CHRNA3, SEMA4B…	upregulated
GO:0032502	developmental process	GO:BP	5.36e-11	6630	496	ENSG00000099204, ENSG00000107518, ENSG00000198873, ENSG00000203805, ENSG00000066468, ENSG00000019995, ENSG00000148848, ENSG00000170430, ENSG00000151640, ENSG00000165996, ENSG00000078114, ENSG00000099246, ENSG00000095739, ENSG00000170759, ENSG00000072422, ENSG00000122862, ENSG00000107738, ENSG00000156026, ENSG00000122367, ENSG00000198682, ENSG00000107796, ENSG00000148677, ENSG00000095587, ENSG0000…	ABLIM1, ATRNL1, GRK5, PPAPDC1A, FGFR2, ZRANB1, ADAM12, MGMT, DPYSL4, PTPLA, NEBL, RAB18, BAMBI, KIF5B, RHOBTB1, SRGN, C10orf54, MCU, LDB3, PAPSS2, ACTA2, ANKRD1, TLL2, ANKRD2, RDX, CRYAB, IL18, PTS, CADM1, TAGLN, MCAM, SORL1, UBASH3B, KIRREL3, RRAS2, SOX6, HTATIP2, LGR4, BDNF, PAX6, PKP3, OR51E2, TRIM6, EHD1, PPP2R5B, CST6, LRP5, FOLR1, MTMR2, CNTN5, TXNRD1, NUAK1, SRRM4, CCDC64, MSI1, STX2, MGP,…	downregulated
GO:0035295	tube development	GO:BP	5.84e-11	1143	217	ENSG00000066468, ENSG00000148848, ENSG00000151651, ENSG00000165757, ENSG00000099250, ENSG00000177283, ENSG00000165731, ENSG00000128805, ENSG00000107731, ENSG00000108175, ENSG00000150782, ENSG00000076706, ENSG00000166250, ENSG00000154133, ENSG00000109854, ENSG00000205213, ENSG00000176697, ENSG00000007372, ENSG00000110492, ENSG00000168056, ENSG00000166341, ENSG00000162337, ENSG00000110195, ENSG0000…	FGFR2, ADAM12, ADAM8, KIAA1462, NRP1, FZD8, RET, ARHGAP22, UNC5B, ZMIZ1, IL18, MCAM, CLMP, ROBO4, HTATIP2, LGR4, BDNF, PAX6, MDK, LTBP3, DCHS1, LRP5, FOLR1, RAPGEF3, FMNL3, ACVRL1, HMGA2, C3AR1, DCN, BTG1, FGF9, CDX2, FLT1, RGCC, KLF5, EDNRB, MMP14, REC8, BMP4, ZFP36L1, TJP1, FMN1, SLC12A6, THBS1, SPINT1, FGF7, SMAD3, NOX5, ANPEP, NR2F2, ITGAX, IRX3, MMP2, GPR56, CRISPLD2, SERPINF1, CCL2, PLXDC1,…	any
GO:0098590	plasma membrane region	GO:CC	7.15e-11	1153	216	ENSG00000107611, ENSG00000165757, ENSG00000099250, ENSG00000170324, ENSG00000137710, ENSG00000109846, ENSG00000182985, ENSG00000149403, ENSG00000080854, ENSG00000026508, ENSG00000148948, ENSG00000134569, ENSG00000011347, ENSG00000149489, ENSG00000068831, ENSG00000110047, ENSG00000175592, ENSG00000174871, ENSG00000174669, ENSG00000110195, ENSG00000087053, ENSG00000149972, ENSG00000139112, ENSG0000…	CUBN, KIAA1462, NRP1, FRMPD2, RDX, CRYAB, CADM1, GRIK4, IGSF9B, CD44, LRRC4C, LRP4, SYT7, ROM1, RASGRP2, EHD1, FOSL1, CNIH2, SLC29A2, FOLR1, MTMR2, CNTN5, GABARAPL1, NOS1, STX2, PTPRO, LRRK2, CNTN1, ERBB3, SLC26A10, PLEKHG6, SCNN1A, GRIP1, LIN7A, ATP2B1, LCP1, HTR2A, PCDH17, KCTD12, SLITRK1, FARP1, SLC7A7, SLC7A8, FERMT2, AKAP5, MPP5, GABRA5, GABRB3, TJP1, SLC12A6, SHC4, TPM1, NPTN, CHRNA3, ABHD1…	any
GO:0007275	multicellular organism development	GO:BP	7.21e-11	5604	433	ENSG00000099204, ENSG00000107518, ENSG00000203805, ENSG00000066468, ENSG00000148848, ENSG00000170430, ENSG00000151640, ENSG00000165996, ENSG00000078114, ENSG00000099246, ENSG00000095739, ENSG00000170759, ENSG00000122862, ENSG00000107738, ENSG00000122367, ENSG00000198682, ENSG00000107796, ENSG00000148677, ENSG00000095587, ENSG00000165887, ENSG00000109846, ENSG00000150782, ENSG00000150787, ENSG0000…	ABLIM1, ATRNL1, PPAPDC1A, FGFR2, ADAM12, MGMT, DPYSL4, PTPLA, NEBL, RAB18, BAMBI, KIF5B, SRGN, C10orf54, LDB3, PAPSS2, ACTA2, ANKRD1, TLL2, ANKRD2, CRYAB, IL18, PTS, CADM1, TAGLN, MCAM, SORL1, UBASH3B, KIRREL3, SOX6, HTATIP2, LGR4, BDNF, PAX6, PKP3, EHD1, PPP2R5B, LRP5, FOLR1, MTMR2, CNTN5, TXNRD1, SRRM4, CCDC64, MSI1, STX2, MGP, PTPRO, PKP2, ABCD2, CNTN1, SCN8A, KRT80, KRT86, KRT81, HOXC13, ERBB…	downregulated
GO:0051241	negative regulation of multicellular organismal process	GO:BP	7.72e-11	1358	148	ENSG00000148803, ENSG00000099250, ENSG00000107984, ENSG00000122861, ENSG00000184719, ENSG00000185187, ENSG00000110492, ENSG00000134569, ENSG00000149131, ENSG00000168056, ENSG00000111252, ENSG00000188906, ENSG00000139567, ENSG00000127324, ENSG00000070961, ENSG00000011465, ENSG00000102760, ENSG00000136160, ENSG00000125245, ENSG00000185650, ENSG00000100784, ENSG00000119714, ENSG00000137872, ENSG0000…	FUOM, NRP1, DKK1, PLAU, RNLS, SIGIRR, MDK, LRP4, SERPING1, LTBP3, SH2B3, LRRK2, ACVRL1, TSPAN8, ATP2B1, DCN, RGCC, EDNRB, GPR18, ZFP36L1, RPS6KA5, GPR68, SEMA6D, SMAD3, SEMA4B, STX1B, PYCARD, IRX3, GPR56, MC1R, ADORA2B, SERPINF1, LGALS9, OMG, TRPV3, TRPV1, NR1D1, JUP, DHX58, WNK4, GFAP, SOX9, RNF125, ACP5, MIR27A, GDF15, ZFP36, TGFB1, CEACAM1, BCL3, RELB, SEMA6B, C5AR2, CD33, PTPN22, TNFRSF4, DRA…	upregulated
GO:0060284	regulation of cell development	GO:BP	7.82e-11	991	194	ENSG00000148803, ENSG00000099250, ENSG00000165731, ENSG00000107984, ENSG00000148677, ENSG00000137642, ENSG00000176697, ENSG00000007372, ENSG00000148948, ENSG00000110492, ENSG00000134569, ENSG00000110047, ENSG00000068971, ENSG00000089250, ENSG00000151490, ENSG00000123095, ENSG00000188906, ENSG00000018236, ENSG00000135407, ENSG00000155974, ENSG00000139220, ENSG00000132932, ENSG00000133110, ENSG0000…	FUOM, NRP1, RET, DKK1, ANKRD1, SORL1, BDNF, PAX6, LRRC4C, MDK, LRP4, EHD1, PPP2R5B, NOS1, PTPRO, BHLHE41, LRRK2, CNTN1, AVIL, GRIP1, PPFIA2, ATP8A2, POSTN, EDNRB, SLITRK1, BMP4, GPR68, SPINT1, SEMA6D, NPTN, CHRNA3, SH3GL3, SEMA4B, GPRC5B, STX1B, IRX3, GPR56, PMP22, SCARF1, SERPINF1, RNF112, ULK2, FAM101B, OMG, TRPV1, NR1D1, GFAP, MMD, AXIN2, SOX9, UNC13D, HES7, NTN1, CDH2, SIGLEC15, DLL3, TGFB1, …	any
GO:0031589	cell-substrate adhesion	GO:BP	8.24e-11	355	92	ENSG00000148484, ENSG00000099250, ENSG00000122861, ENSG00000026508, ENSG00000110492, ENSG00000149781, ENSG00000151490, ENSG00000139567, ENSG00000139626, ENSG00000135424, ENSG00000139220, ENSG00000074527, ENSG00000183087, ENSG00000133110, ENSG00000157227, ENSG00000129474, ENSG00000073712, ENSG00000072110, ENSG00000248905, ENSG00000137801, ENSG00000166949, ENSG00000102879, ENSG00000102854, ENSG0000…	RSU1, NRP1, PLAU, CD44, MDK, FERMT3, PTPRO, ACVRL1, ITGB7, ITGA7, PPFIA2, NTN4, GAS6, POSTN, MMP14, AJUBA, FERMT2, ACTN1, FMN1, THBS1, SMAD3, CORO1A, MSLN, JUP, DUSP3, UNC13D, BCAM, TTYH1, CAMSAP3, VCAM1, CSF1, PDPN, ITGA10, PIP5K1A, EFNA1, THBS3, LAMB3, DISC1, NID1, ACTN2, COL16A1, CYR61, GBP1, RIN2, PREX1, BCR, RAC2, MAP4K4, MERTK, EPB41L5, LIMS2, ITGA4, FN1, SNED1, EMILIN1, ABI3BP, BCL6, APOD,…	any
GO:0030017	sarcomere	GO:CC	8.27e-11	207	63	ENSG00000078114, ENSG00000138347, ENSG00000122367, ENSG00000148677, ENSG00000165887, ENSG00000109846, ENSG00000089250, ENSG00000196876, ENSG00000185567, ENSG00000165410, ENSG00000073712, ENSG00000072110, ENSG00000159251, ENSG00000128872, ENSG00000138594, ENSG00000263155, ENSG00000140416, ENSG00000087245, ENSG00000133020, ENSG00000109061, ENSG00000125414, ENSG00000109063, ENSG00000173801, ENSG0000…	NEBL, MYPN, LDB3, ANKRD1, ANKRD2, CRYAB, NOS1, SCN8A, AHNAK2, CFL2, FERMT2, ACTN1, ACTC1, TMOD2, TMOD3, MYZAP, TPM1, MMP2, MYH8, MYH1, MYH2, MYH3, JUP, MYOM1, MYL12A, MYL12B, FHOD3, NOS1AP, TNNT2, TNNI1, CSRP1, LMOD1, ACTN2, PDE4B, NEXN, MYL9, JPH2, SCN1A, XIRP2, KLHL41, MYL1, FKBP1B, TRIM54, SLC8A1, CALM2, TIMP4, SCN5A, TNNC1, PPP3CA, SYNPO2, MYOZ2, PDLIM3, SORBS2, KCNN2, PDLIM7, FLNC, DNAJB6, F…	any
GO:0045202	synapse	GO:CC	8.43e-11	1362	246	ENSG00000107554, ENSG00000066468, ENSG00000099246, ENSG00000099250, ENSG00000128805, ENSG00000122862, ENSG00000109846, ENSG00000182985, ENSG00000149403, ENSG00000149571, ENSG00000080854, ENSG00000176697, ENSG00000148948, ENSG00000019505, ENSG00000134569, ENSG00000011347, ENSG00000110076, ENSG00000068831, ENSG00000175592, ENSG00000174871, ENSG00000174669, ENSG00000149260, ENSG00000166405, ENSG0000…	DNMBP, FGFR2, RAB18, NRP1, ARHGAP22, SRGN, CRYAB, CADM1, GRIK4, KIRREL3, IGSF9B, BDNF, LRRC4C, SYT13, LRP4, SYT7, NRXN2, RASGRP2, FOSL1, CNIH2, SLC29A2, CAPN5, RIC3, MTMR2, CNTN5, NOS1, RIMBP2, STX2, PTPRO, LRRK2, CNTN1, STAC3, KIF5A, PPM1H, GRIP1, LIN7A, PPFIA2, ATP2B1, WASF3, DCLK1, POSTN, HTR2A, PCDH17, KCTD12, SLITRK1, GPC6, FARP1, BEGAIN, SAMD4A, AKAP5, ACTN1, GABRA5, GABRB3, SLC12A6, ACTC1,…	any
GO:0031982	vesicle	GO:CC	8.7e-11	3914	587	ENSG00000065621, ENSG00000151892, ENSG00000066468, ENSG00000187908, ENSG00000151651, ENSG00000148484, ENSG00000107611, ENSG00000204740, ENSG00000078114, ENSG00000099246, ENSG00000170759, ENSG00000099250, ENSG00000165731, ENSG00000204176, ENSG00000107984, ENSG00000072422, ENSG00000122862, ENSG00000099282, ENSG00000122861, ENSG00000108219, ENSG00000107796, ENSG00000108239, ENSG00000187240, ENSG0000…	GSTO2, GFRA1, FGFR2, DMBT1, ADAM8, RSU1, CUBN, MALRD1, NEBL, RAB18, KIF5B, NRP1, RET, SYT15, DKK1, RHOBTB1, SRGN, TSPAN15, PLAU, TSPAN14, ACTA2, TBC1D12, DYNC2H1, AMPD3, RDX, C11orf52, CRYAB, SORL1, ROBO4, SLC37A2, KIRREL3, RRAS2, LSP1, ANO5, SVIP, BDNF, IFITM3, CD44, CD82, SYT13, OR51E2, SERPING1, SYT7, AHNAK, FERMT3, EHD1, DNHD1, LTBP3, CST6, CNIH2, TPP1, FOLR1, CAPN5, MTMR2, GABARAPL1, TXNRD1,…	any
GO:0005576	extracellular region	GO:CC	9.32e-11	4548	667	ENSG00000065621, ENSG00000120051, ENSG00000151892, ENSG00000066468, ENSG00000187908, ENSG00000148848, ENSG00000148484, ENSG00000107611, ENSG00000078114, ENSG00000099250, ENSG00000107984, ENSG00000165471, ENSG00000122862, ENSG00000138316, ENSG00000122861, ENSG00000189129, ENSG00000184719, ENSG00000107796, ENSG00000095587, ENSG00000187151, ENSG00000137745, ENSG00000187240, ENSG00000133805, ENSG0000…	GSTO2, CCDC147, GFRA1, FGFR2, DMBT1, ADAM12, RSU1, CUBN, NEBL, NRP1, DKK1, MBL2, SRGN, ADAMTS14, PLAU, PLAC9, RNLS, ACTA2, TLL2, ANGPTL5, MMP13, DYNC2H1, AMPD3, RDX, C11orf52, CRYAB, IL18, MCAM, DKK3, SORL1, ROBO4, SLC37A2, KIRREL3, ADAMTS15, RRAS2, LSP1, SVIP, FIBIN, BDNF, PRRG4, CD44, LRRC4C, CD82, MDK, HBE1, HBG2, SERPING1, ZP1, SYT7, AHNAK, FERMT3, EHD1, DNHD1, LTBP3, CST6, TPP1, FOLR1, OLFML…	any
GO:0032989	cellular component morphogenesis	GO:BP	9.65e-11	1177	132	ENSG00000066468, ENSG00000019995, ENSG00000151640, ENSG00000078114, ENSG00000095739, ENSG00000170759, ENSG00000072422, ENSG00000122367, ENSG00000148677, ENSG00000137710, ENSG00000149571, ENSG00000110693, ENSG00000176697, ENSG00000007372, ENSG00000087053, ENSG00000151490, ENSG00000139132, ENSG00000155974, ENSG00000139304, ENSG00000074527, ENSG00000041515, ENSG00000132932, ENSG00000132970, ENSG0000…	FGFR2, ZRANB1, DPYSL4, NEBL, BAMBI, KIF5B, RHOBTB1, LDB3, ANKRD1, RDX, KIRREL3, SOX6, BDNF, PAX6, MTMR2, PTPRO, FGD4, GRIP1, PTPRQ, NTN4, MYO16, ATP8A2, WASF3, FRY, DCLK1, FARP1, CFL2, FERMT2, SPTB, MPP5, ACTN1, ATP10A, ACTC1, TMOD2, TMOD3, TPM1, NPTN, DOK4, MYH3, PMP22, ULK2, SLC9A3R1, UNC13D, MYH10, NTN1, CDH2, MYOM1, MYL12A, MYL12B, FHOD3, EPB41L3, PTPRM, WTIP, APOE, MYH14, LRRC4B, CACNG7, PAL…	downregulated
GO:0006936	muscle contraction	GO:BP	1.05e-10	362	93	ENSG00000107796, ENSG00000165887, ENSG00000109846, ENSG00000089250, ENSG00000134548, ENSG00000057294, ENSG00000196465, ENSG00000092841, ENSG00000185482, ENSG00000070961, ENSG00000132932, ENSG00000102468, ENSG00000136160, ENSG00000168398, ENSG00000159251, ENSG00000128872, ENSG00000138594, ENSG00000140416, ENSG00000080644, ENSG00000182253, ENSG00000087258, ENSG00000162004, ENSG00000183044, ENSG0000…	ACTA2, ANKRD2, CRYAB, NOS1, C12orf39, PKP2, MYL6B, MYL6, STAC3, ATP2B1, ATP8A2, HTR2A, EDNRB, BDKRB2, ACTC1, TMOD2, TMOD3, TPM1, CHRNA3, SYNM, GNAO1, CCDC78, ABAT, MYH8, MYH1, MYH2, MYH3, ADORA2B, KCNJ12, TRPV1, JUP, SPHK1, GAA, DSG2, MYOM1, MYL12A, MYL12B, CNN1, MYH14, CHRNB2, NOS1AP, RCSD1, ATP1B1, PTGS2, RGS2, TNNT2, TNNI1, LMOD1, ADORA1, AGT, HTR1D, ACTN2, CHRM3, PDE4B, SNTA1, MYL9, ADRA1D, A…	any
GO:0030016	myofibril	GO:CC	1.15e-10	229	67	ENSG00000078114, ENSG00000138347, ENSG00000122367, ENSG00000148677, ENSG00000165887, ENSG00000109846, ENSG00000124942, ENSG00000089250, ENSG00000196876, ENSG00000185567, ENSG00000165410, ENSG00000073712, ENSG00000072110, ENSG00000159251, ENSG00000128872, ENSG00000138594, ENSG00000263155, ENSG00000140416, ENSG00000182253, ENSG00000087245, ENSG00000133020, ENSG00000109061, ENSG00000125414, ENSG0000…	NEBL, MYPN, LDB3, ANKRD1, ANKRD2, CRYAB, AHNAK, NOS1, SCN8A, AHNAK2, CFL2, FERMT2, ACTN1, ACTC1, TMOD2, TMOD3, MYZAP, TPM1, SYNM, MMP2, MYH8, MYH1, MYH2, MYH3, JUP, MYOM1, MYL12A, MYL12B, FHOD3, NOS1AP, TNNT2, TNNI1, CSRP1, LMOD1, ACTN2, PDE4B, NEXN, MYL9, JPH2, SCN1A, XIRP2, KLHL41, MYL1, FKBP1B, TRIM54, SLC8A1, CALM2, MYH15, TIMP4, SCN5A, TNNC1, PPP3CA, SYNPO2, MYOZ2, PDLIM3, SORBS2, KCNN2, PDL…	any
GO:0007156	homophilic cell adhesion via plasma membrane adhesion molecules	GO:BP	1.3e-10	167	39	ENSG00000165731, ENSG00000138347, ENSG00000149564, ENSG00000154133, ENSG00000080854, ENSG00000166341, ENSG00000184226, ENSG00000101542, ENSG00000079385, ENSG00000075275, ENSG00000189184, ENSG00000204956, ENSG00000081853, ENSG00000254245, ENSG00000254221, ENSG00000262576, ENSG00000253910, ENSG00000253485, ENSG00000262209, ENSG00000253731, ENSG00000253537, ENSG00000253953, ENSG00000253767, ENSG0000…	RET, MYPN, ESAM, ROBO4, IGSF9B, DCHS1, PCDH9, CDH20, CEACAM1, CELSR1, PCDH18, PCDHGA1, PCDHGA2, PCDHGA3, PCDHGB1, PCDHGA4, PCDHGB2, PCDHGA5, PCDHGB3, PCDHGA6, PCDHGA7, PCDHGB4, PCDHGA8, PCDHGA9, PCDHGB6, PCDHGA10, PCDHGB7, PCDHGA11, PCDHGA12, PCDHGC3, PCDHGC4, PCDHGC5, PCDH12, FAT2, CDH18, CDH12, CDH10, CDH9, CDH6	upregulated
GO:0051094	positive regulation of developmental process	GO:BP	1.33e-10	1457	261	ENSG00000066468, ENSG00000148848, ENSG00000151651, ENSG00000095739, ENSG00000165757, ENSG00000099250, ENSG00000165731, ENSG00000107984, ENSG00000107738, ENSG00000156026, ENSG00000108175, ENSG00000148677, ENSG00000150782, ENSG00000137642, ENSG00000110693, ENSG00000205213, ENSG00000176697, ENSG00000185885, ENSG00000007372, ENSG00000110492, ENSG00000124920, ENSG00000133321, ENSG00000110047, ENSG0000…	FGFR2, ADAM12, ADAM8, BAMBI, KIAA1462, NRP1, RET, DKK1, C10orf54, MCU, ZMIZ1, ANKRD1, IL18, SORL1, SOX6, LGR4, BDNF, IFITM1, PAX6, MDK, MYRF, RARRES3, EHD1, PPP2R5B, LTBP3, LRP5, CNTN1, RAPGEF3, ACVRL1, TESPA1, ERBB3, AVIL, HMGA2, GRIP1, PAWR, C3AR1, ATP2B1, DCN, BTG1, TNFSF13B, GAS6, FGF9, ATP8A2, WASF3, CDX2, FLT1, RGCC, HTR2A, KLF5, SLITRK1, SLITRK6, MMP14, BMP4, ZFP36L1, FOS, GPR68, TJP1, THB…	any
GO:0051960	regulation of nervous system development	GO:BP	1.35e-10	963	189	ENSG00000148803, ENSG00000099250, ENSG00000165731, ENSG00000107984, ENSG00000148677, ENSG00000137642, ENSG00000176697, ENSG00000007372, ENSG00000148948, ENSG00000110492, ENSG00000134569, ENSG00000124920, ENSG00000110047, ENSG00000068971, ENSG00000087053, ENSG00000089250, ENSG00000151490, ENSG00000123095, ENSG00000188906, ENSG00000018236, ENSG00000135407, ENSG00000155974, ENSG00000139220, ENSG0000…	FUOM, NRP1, RET, DKK1, ANKRD1, SORL1, BDNF, PAX6, LRRC4C, MDK, LRP4, MYRF, EHD1, PPP2R5B, MTMR2, NOS1, PTPRO, BHLHE41, LRRK2, CNTN1, AVIL, GRIP1, PPFIA2, ATP8A2, WASF3, EDNRB, SLITRK1, SLITRK6, GPC6, FARP1, BMP4, SPINT1, SEMA6D, NPTN, CHRNA3, SH3GL3, SEMA4B, GPRC5B, STX1B, ITGAX, IRX3, GPR56, PMP22, SCARF1, SERPINF1, RNF112, ULK2, OMG, NR1D1, GFAP, MMD, SOX9, HES7, NTN1, CDH2, CBLN2, DLL3, TGFB1,…	any
GO:0005201	extracellular matrix structural constituent	GO:MF	1.41e-10	165	38	ENSG00000011465, ENSG00000133110, ENSG00000119681, ENSG00000132205, ENSG00000179403, ENSG00000169231, ENSG00000133048, ENSG00000196878, ENSG00000116962, ENSG00000171812, ENSG00000142871, ENSG00000183798, ENSG00000142156, ENSG00000142173, ENSG00000115414, ENSG00000163359, ENSG00000138080, ENSG00000154175, ENSG00000206561, ENSG00000171564, ENSG00000171557, ENSG00000120708, ENSG00000145681, ENSG0000…	DCN, POSTN, LTBP2, EMILIN2, VWA1, THBS3, CHI3L1, LAMB3, NID1, COL8A2, CYR61, EMILIN3, COL6A1, COL6A2, FN1, COL6A3, EMILIN1, ABI3BP, COLQ, FGB, FGG, TGFBI, HAPLN1, LAMA4, COL10A1, LAMA2, THBS2, TNXB, PCOLCE, LAMB4, COL28A1, TFPI2, CTHRC1, COL27A1, TNC, HMCN2, BGN, SRPX	upregulated
GO:0042127	regulation of cell population proliferation	GO:BP	1.56e-10	1749	177	ENSG00000165757, ENSG00000099250, ENSG00000122861, ENSG00000108175, ENSG00000064201, ENSG00000185885, ENSG00000110492, ENSG00000133321, ENSG00000168056, ENSG00000175592, ENSG00000111252, ENSG00000188906, ENSG00000186897, ENSG00000139567, ENSG00000167779, ENSG00000149948, ENSG00000133639, ENSG00000102524, ENSG00000102760, ENSG00000136160, ENSG00000182809, ENSG00000129465, ENSG00000131981, ENSG0000…	KIAA1462, NRP1, PLAU, ZMIZ1, TSPAN32, IFITM1, MDK, RARRES3, LTBP3, FOSL1, SH2B3, LRRK2, C1QL4, ACVRL1, IGFBP6, HMGA2, BTG1, TNFSF13B, RGCC, EDNRB, CRIP2, RIPK3, LGALS3, ZFP36L1, SPINT1, SHC4, FGF7, SMAD3, NMB, SSTR5, CORO1A, PYCARD, ITGAX, TFAP4, MMP2, GPR56, HSF4, SERPINF1, LGALS9, CCL2, NR1D1, JUP, STAT5A, GFAP, ACE, SOX9, SPHK1, TNFSF13, SERPINB3, JUNB, MIR27A, MIR23A, CRLF1, CD22, ZFP36, TGFB…	upregulated
GO:0070887	cellular response to chemical stimulus	GO:BP	1.57e-10	3418	295	ENSG00000065621, ENSG00000151651, ENSG00000165757, ENSG00000099250, ENSG00000165731, ENSG00000107984, ENSG00000150347, ENSG00000122877, ENSG00000108175, ENSG00000050165, ENSG00000023171, ENSG00000185201, ENSG00000185885, ENSG00000142089, ENSG00000026508, ENSG00000185187, ENSG00000019505, ENSG00000110492, ENSG00000213931, ENSG00000196565, ENSG00000011347, ENSG00000168056, ENSG00000176973, ENSG0000…	GSTO2, ADAM8, KIAA1462, NRP1, RET, DKK1, ARID5B, EGR2, ZMIZ1, DKK3, GRAMD1B, IFITM2, IFITM1, IFITM3, CD44, SIGIRR, SYT13, MDK, HBE1, HBG2, SYT7, LTBP3, FAM89B, TPP1, DGAT2, HVCN1, SH2B3, OAS1, OAS2, NOS1, OASL, LRRK2, RAPGEF3, ACVRL1, HMGA2, C3AR1, ATP2B1, DCN, TNFSF13B, TNFRSF19, POSTN, RGCC, EDNRB, GPR18, CRIP1, IRF9, RIPK3, GNG2, LGALS3, ZFP36L1, LTBP2, FOS, RPS6KA5, GPR68, IFI27, BDKRB2, SLC1…	upregulated
GO:0051179	localization	GO:BP	1.98e-10	6889	951	ENSG00000108018, ENSG00000203805, ENSG00000187908, ENSG00000019995, ENSG00000151651, ENSG00000107611, ENSG00000099246, ENSG00000150054, ENSG00000095739, ENSG00000165757, ENSG00000170759, ENSG00000099250, ENSG00000165731, ENSG00000204176, ENSG00000107984, ENSG00000165471, ENSG00000072422, ENSG00000150347, ENSG00000122877, ENSG00000122862, ENSG00000099282, ENSG00000107738, ENSG00000156026, ENSG0000…	SORCS1, PPAPDC1A, DMBT1, ZRANB1, ADAM8, CUBN, RAB18, MPP7, BAMBI, KIAA1462, KIF5B, NRP1, RET, SYT15, DKK1, MBL2, RHOBTB1, ARID5B, EGR2, SRGN, TSPAN15, C10orf54, MCU, PLAU, TSPAN14, SLC16A12, ANKRD1, SLC35G1, TBC1D12, DYNC2H1, AMPD3, RDX, CRYAB, CADM1, MCAM, TRIM29, GRIK4, SORL1, UBASH3B, GRAMD1B, ESAM, ROBO4, SLC37A2, KIRREL3, RRAS2, HTATIP2, ANO5, SVIP, LGR4, BDNF, IFITM1, PAX6, CD44, PRR5L, PKP…	any
GO:0031224	intrinsic component of membrane	GO:CC	2.24e-10	5842	447	ENSG00000099194, ENSG00000108018, ENSG00000197142, ENSG00000151892, ENSG00000182022, ENSG00000151651, ENSG00000204740, ENSG00000120594, ENSG00000099250, ENSG00000177283, ENSG00000165731, ENSG00000107731, ENSG00000185742, ENSG00000166250, ENSG00000023171, ENSG00000149564, ENSG00000154133, ENSG00000134955, ENSG00000080854, ENSG00000198168, ENSG00000064201, ENSG00000185201, ENSG00000185885, ENSG0000…	SCD, SORCS1, ACSL5, GFRA1, CHST15, ADAM8, MALRD1, PLXDC2, NRP1, FZD8, RET, UNC5B, C11orf87, CLMP, GRAMD1B, ESAM, ROBO4, SLC37A2, IGSF9B, SVIP, TSPAN32, IFITM2, IFITM1, IFITM3, KIAA1549L, CD44, LRRC4C, SIGIRR, CD82, SYT13, LRP4, AC104389.28, ZP1, SYT7, MYRF, ROM1, RARRES3, NRXN2, CNIH2, DCHS1, DGAT2, KLRC4, KLRC4-KLRK1, KLRC3, NKG2-E, KLRC2, KLRC1, HVCN1, TAS2R30, NOS1, TMEM132B, GPRC5A, EMP1, CAC…	upregulated
GO:0005509	calcium ion binding	GO:MF	2.57e-10	717	93	ENSG00000151651, ENSG00000107611, ENSG00000165731, ENSG00000183346, ENSG00000137745, ENSG00000019505, ENSG00000134569, ENSG00000011347, ENSG00000168056, ENSG00000166341, ENSG00000182326, ENSG00000159403, ENSG00000184226, ENSG00000198732, ENSG00000119681, ENSG00000255346, ENSG00000140563, ENSG00000101542, ENSG00000127507, ENSG00000142552, ENSG00000167614, ENSG00000105519, ENSG00000196154, ENSG0000…	ADAM8, CUBN, RET, C10orf107, MMP13, SYT13, LRP4, SYT7, LTBP3, DCHS1, C1S, C1R, PCDH9, SMOC1, LTBP2, NOX5, MCTP2, CDH20, EMR2, RCN3, TTYH1, CAPS, S100A4, S100A16, THBS3, BGLAP, PADI3, SYT2, PLCH2, NID1, ACTN2, EFCAB6, CELSR1, HPCAL1, FBLN7, GCA, VSNL1, DNAH7, PLCD4, DNER, SNED1, CBLB, ESYT3, PLCD1, PPP3CA, PCDH18, FSTL5, SPOCK3, ANXA10, KCNIP4, STIM2, SPOCK1, PCDHGA1, PCDHGA2, PCDHGA3, PCDHGB1, PC…	upregulated
GO:0043005	neuron projection	GO:CC	2.64e-10	1376	246	ENSG00000170759, ENSG00000099250, ENSG00000165731, ENSG00000138347, ENSG00000137710, ENSG00000109846, ENSG00000154133, ENSG00000149571, ENSG00000080854, ENSG00000176697, ENSG00000019505, ENSG00000134569, ENSG00000011347, ENSG00000149489, ENSG00000068831, ENSG00000175592, ENSG00000174871, ENSG00000174791, ENSG00000166405, ENSG00000087053, ENSG00000139112, ENSG00000089250, ENSG00000151490, ENSG0000…	KIF5B, NRP1, RET, MYPN, RDX, CRYAB, ROBO4, KIRREL3, IGSF9B, BDNF, SYT13, LRP4, SYT7, ROM1, RASGRP2, FOSL1, CNIH2, RIN1, RIC3, MTMR2, GABARAPL1, NOS1, PTPRO, LRRK2, SLC38A1, SCN8A, ACVRL1, KIF5A, AVIL, GRIP1, TPH2, PPFIA2, ATP2B1, ATP8A2, HTR2A, PCDH9, FARP1, NDRG2, SAMD4A, GCH1, AKAP5, MPP5, ADAM21, FOS, GABRA5, GABRB3, GLDN, TMOD2, NPTN, CHRNA3, RASGRF1, ABHD17C, NMB, IGF1R, SSTR5, SHISA9, PRRT2…	any
GO:0005201	extracellular matrix structural constituent	GO:MF	2.9e-10	165	54	ENSG00000111341, ENSG00000197614, ENSG00000011465, ENSG00000133110, ENSG00000119681, ENSG00000137801, ENSG00000157766, ENSG00000132205, ENSG00000060718, ENSG00000179403, ENSG00000143367, ENSG00000169231, ENSG00000133048, ENSG00000196878, ENSG00000116962, ENSG00000142910, ENSG00000084636, ENSG00000171812, ENSG00000142871, ENSG00000183798, ENSG00000142156, ENSG00000142173, ENSG00000132031, ENSG0000…	MGP, MFAP5, DCN, POSTN, LTBP2, THBS1, ACAN, EMILIN2, COL11A1, VWA1, TUFT1, THBS3, CHI3L1, LAMB3, NID1, TINAGL1, COL16A1, COL8A2, CYR61, EMILIN3, COL6A1, COL6A2, MATN3, FN1, COL4A4, COL4A3, COL6A3, EMILIN1, ABI3BP, COLQ, FGB, FGG, IGFBP7, FRAS1, TGFBI, HAPLN1, EDIL3, LAMA4, COL10A1, LAMA2, THBS2, TNXB, PCOLCE, LAMB4, COL28A1, TFPI2, CTHRC1, COL27A1, TNC, HMCN2, COL4A5, BGN, MXRA5, SRPX	any
GO:0048583	regulation of response to stimulus	GO:BP	3.35e-10	4421	649	ENSG00000107554, ENSG00000138166, ENSG00000198873, ENSG00000203805, ENSG00000066468, ENSG00000019995, ENSG00000170430, ENSG00000151651, ENSG00000150054, ENSG00000095739, ENSG00000165757, ENSG00000107968, ENSG00000170759, ENSG00000099250, ENSG00000177283, ENSG00000165731, ENSG00000204176, ENSG00000128805, ENSG00000198964, ENSG00000107984, ENSG00000165471, ENSG00000072422, ENSG00000099282, ENSG0000…	DNMBP, DUSP5, GRK5, PPAPDC1A, FGFR2, ZRANB1, MGMT, ADAM8, MPP7, BAMBI, KIAA1462, MAP3K8, KIF5B, NRP1, FZD8, RET, SYT15, ARHGAP22, SGMS1, DKK1, MBL2, RHOBTB1, TSPAN15, UNC5B, C10orf54, MCU, PLAU, ZMIZ1, TSPAN14, ANKRD1, PIK3AP1, ANKRD2, DYNC2H1, RDX, CRYAB, IL18, CADM1, DKK3, SORL1, UBASH3B, IGSF9B, DUSP8, SVIP, TSPAN32, LGR4, BDNF, CDKN1C, IFITM1, DEPDC7, CD44, PRR5L, SIGIRR, SYT13, MDK, LRP4, OR…	any
GO:0005576	extracellular region	GO:CC	3.71e-10	4548	364	ENSG00000065621, ENSG00000151892, ENSG00000187908, ENSG00000107611, ENSG00000099250, ENSG00000107984, ENSG00000165471, ENSG00000138316, ENSG00000122861, ENSG00000184719, ENSG00000187151, ENSG00000137745, ENSG00000187240, ENSG00000133805, ENSG00000050165, ENSG00000154133, ENSG00000134955, ENSG00000130592, ENSG00000198168, ENSG00000176971, ENSG00000026508, ENSG00000148948, ENSG00000085117, ENSG0000…	GSTO2, GFRA1, DMBT1, CUBN, NRP1, DKK1, MBL2, ADAMTS14, PLAU, RNLS, ANGPTL5, MMP13, DYNC2H1, AMPD3, DKK3, ROBO4, SLC37A2, LSP1, SVIP, FIBIN, CD44, LRRC4C, CD82, MDK, HBE1, HBG2, SERPING1, ZP1, SYT7, AHNAK, FERMT3, DNHD1, LTBP3, TPP1, CAPN5, OAS1, GPRC5A, H2AFJ, LRRK2, RAPGEF3, C1QL4, KRT75, IGFBP6, ITGB7, LRIG3, SCNN1A, C1S, TSPAN8, C1RL, RBP5, LIN7A, PPFIA2, RASSF9, GALNT4, ATP2B1, DCN, A2M, TNFS…	upregulated
GO:0007166	cell surface receptor signaling pathway	GO:BP	4.02e-10	3197	493	ENSG00000151892, ENSG00000198873, ENSG00000203805, ENSG00000066468, ENSG00000019995, ENSG00000095739, ENSG00000165757, ENSG00000107968, ENSG00000099250, ENSG00000177283, ENSG00000165731, ENSG00000107984, ENSG00000150347, ENSG00000099282, ENSG00000107731, ENSG00000108175, ENSG00000108219, ENSG00000187240, ENSG00000150782, ENSG00000050165, ENSG00000149403, ENSG00000137642, ENSG00000154127, ENSG0000…	GFRA1, GRK5, PPAPDC1A, FGFR2, ZRANB1, BAMBI, KIAA1462, MAP3K8, NRP1, FZD8, RET, DKK1, ARID5B, TSPAN15, UNC5B, ZMIZ1, TSPAN14, DYNC2H1, IL18, DKK3, GRIK4, SORL1, UBASH3B, IGSF9B, TSPAN32, LGR4, BDNF, CDKN1C, IFITM2, IFITM1, PAX6, IFITM3, CD44, SIGIRR, MDK, LRP4, TRIM6, DTX4, FERMT3, PPP2R5B, LTBP3, FAM89B, CNIH2, LRP5, FOLR1, PIDD, MTMR2, KLRC1, SH2B3, OAS1, OAS2, OASL, GPRC5A, PTPRO, LRRK2, CNTN1…	any
GO:0030334	regulation of cell migration	GO:BP	5.73e-10	978	115	ENSG00000151651, ENSG00000165757, ENSG00000099250, ENSG00000165731, ENSG00000122861, ENSG00000154133, ENSG00000185885, ENSG00000110492, ENSG00000149781, ENSG00000176973, ENSG00000139567, ENSG00000171860, ENSG00000011465, ENSG00000133110, ENSG00000102760, ENSG00000125245, ENSG00000157227, ENSG00000129465, ENSG00000131981, ENSG00000137872, ENSG00000140285, ENSG00000035664, ENSG00000166949, ENSG0000…	ADAM8, KIAA1462, NRP1, RET, PLAU, ROBO4, IFITM1, MDK, FERMT3, FAM89B, ACVRL1, C3AR1, DCN, POSTN, RGCC, GPR18, MMP14, RIPK3, LGALS3, SEMA6D, FGF7, DAPK2, SMAD3, SEMA4B, CORO1A, PYCARD, ITGAX, GPR56, SERPINF1, LGALS9, CCL2, GRB7, JUP, STAT5A, ACE, SOX9, SPHK1, CYGB, SERPINB3, MIR27A, MIR23A, TGFB1, CEACAM1, SEMA6B, C5AR2, CSF1, PTPN22, TNFSF18, GLUL, PTGS2, PTPRC, PTPRU, TIE1, CYR61, RIN2, ADA, PRE…	upregulated
GO:0007155	cell adhesion	GO:BP	6.31e-10	1440	150	ENSG00000148848, ENSG00000148484, ENSG00000107968, ENSG00000107738, ENSG00000137710, ENSG00000150782, ENSG00000182985, ENSG00000160588, ENSG00000076706, ENSG00000137699, ENSG00000154127, ENSG00000149571, ENSG00000184363, ENSG00000149972, ENSG00000074590, ENSG00000151490, ENSG00000057294, ENSG00000018236, ENSG00000065361, ENSG00000177425, ENSG00000074527, ENSG00000183087, ENSG00000118946, ENSG0000…	ADAM12, RSU1, MAP3K8, C10orf54, RDX, IL18, CADM1, MPZL3, MCAM, TRIM29, UBASH3B, KIRREL3, PKP3, CNTN5, NUAK1, PTPRO, PKP2, CNTN1, ERBB3, PAWR, NTN4, GAS6, PCDH17, AJUBA, STXBP6, FERMT2, BMP4, ACTN1, TJP1, THBS1, TMOD3, TPM1, NPTN, ACAN, ARHGDIG, CHST4, MSLN, ABAT, ITGAE, DUSP3, SDK2, UNC13D, MYH10, NTN1, CDH2, DSG2, MYL12A, PTPRM, TWSG1, PVR, LRRC4B, FSTL3, CAMSAP3, CELSR2, AMIGO1, PDPN, PIP5K1A, …	downregulated
GO:0030154	cell differentiation	GO:BP	6.54e-10	4335	353	ENSG00000151892, ENSG00000187908, ENSG00000151651, ENSG00000148803, ENSG00000099250, ENSG00000177283, ENSG00000067082, ENSG00000165731, ENSG00000128805, ENSG00000107984, ENSG00000165471, ENSG00000150347, ENSG00000122877, ENSG00000148634, ENSG00000138347, ENSG00000107731, ENSG00000108175, ENSG00000187240, ENSG00000154133, ENSG00000151702, ENSG00000185885, ENSG00000148948, ENSG00000110492, ENSG0000…	GFRA1, DMBT1, ADAM8, FUOM, NRP1, FZD8, KLF6, RET, ARHGAP22, DKK1, MBL2, ARID5B, EGR2, HERC4, MYPN, UNC5B, ZMIZ1, DYNC2H1, ROBO4, FLI1, IFITM1, LRRC4C, MDK, LRP4, MYRF, ROM1, LGALS12, RARRES3, FERMT3, BATF2, LTBP3, TPP1, DCHS1, SH2B3, NOS1, BHLHE41, LRRK2, RAPGEF3, C1QL4, ACVRL1, KRT75, ITGB7, TESPA1, ITGA7, NAB2, STAC3, KIF5A, AVIL, HMGA2, PPFIA2, DUSP6, BTG1, A2M, C12orf55, POSTN, RGCC, EDNRB, S…	upregulated
GO:2000145	regulation of cell motility	GO:BP	7e-10	1042	120	ENSG00000151651, ENSG00000165757, ENSG00000099250, ENSG00000165731, ENSG00000122861, ENSG00000154133, ENSG00000185885, ENSG00000110492, ENSG00000149781, ENSG00000176973, ENSG00000139567, ENSG00000171860, ENSG00000011465, ENSG00000133110, ENSG00000102760, ENSG00000125245, ENSG00000157227, ENSG00000129465, ENSG00000131981, ENSG00000137872, ENSG00000140285, ENSG00000035664, ENSG00000166949, ENSG0000…	ADAM8, KIAA1462, NRP1, RET, PLAU, ROBO4, IFITM1, MDK, FERMT3, FAM89B, ACVRL1, C3AR1, DCN, POSTN, RGCC, GPR18, MMP14, RIPK3, LGALS3, SEMA6D, FGF7, DAPK2, SMAD3, SEMA4B, CORO1A, PYCARD, ITGAX, GPR56, SERPINF1, LGALS9, CCL2, GRB7, JUP, STAT5A, ACE, SOX9, SPHK1, CYGB, SERPINB3, MIR27A, MIR23A, TGFB1, CEACAM1, SEMA6B, C5AR2, CSF1, PTPN22, TNFSF18, GLUL, PTGS2, PTPRC, PTPRU, TIE1, CYR61, RIN2, ADA, PRE…	upregulated
GO:0051270	regulation of cellular component movement	GO:BP	7.17e-10	1129	127	ENSG00000151651, ENSG00000165757, ENSG00000099250, ENSG00000165731, ENSG00000122861, ENSG00000154133, ENSG00000185885, ENSG00000110492, ENSG00000149781, ENSG00000176973, ENSG00000174871, ENSG00000139567, ENSG00000171860, ENSG00000011465, ENSG00000133110, ENSG00000102760, ENSG00000125245, ENSG00000157227, ENSG00000129465, ENSG00000131981, ENSG00000137872, ENSG00000140285, ENSG00000035664, ENSG0000…	ADAM8, KIAA1462, NRP1, RET, PLAU, ROBO4, IFITM1, MDK, FERMT3, FAM89B, CNIH2, ACVRL1, C3AR1, DCN, POSTN, RGCC, GPR18, MMP14, RIPK3, LGALS3, SEMA6D, FGF7, DAPK2, SMAD3, SEMA4B, CORO1A, PYCARD, ITGAX, GPR56, SERPINF1, LGALS9, CCL2, GRB7, JUP, STAT5A, ACE, SOX9, SPHK1, CYGB, CCDC40, SERPINB3, MIR27A, MIR23A, TGFB1, CEACAM1, SEMA6B, C5AR2, CSF1, PTPN22, TRIM46, NOS1AP, TNFSF18, GLUL, PTGS2, PTPRC, PTP…	upregulated
GO:0048858	cell projection morphogenesis	GO:BP	7.41e-10	691	145	ENSG00000151892, ENSG00000066468, ENSG00000151640, ENSG00000170759, ENSG00000099250, ENSG00000165731, ENSG00000122877, ENSG00000138347, ENSG00000107731, ENSG00000154133, ENSG00000149571, ENSG00000176697, ENSG00000007372, ENSG00000026508, ENSG00000148948, ENSG00000110492, ENSG00000134569, ENSG00000151490, ENSG00000188906, ENSG00000155980, ENSG00000155974, ENSG00000139220, ENSG00000074527, ENSG0000…	GFRA1, FGFR2, DPYSL4, KIF5B, NRP1, RET, EGR2, MYPN, UNC5B, ROBO4, KIRREL3, BDNF, PAX6, CD44, LRRC4C, MDK, LRP4, PTPRO, LRRK2, KIF5A, GRIP1, PPFIA2, NTN4, MYO16, ATP8A2, DCLK1, POSTN, SLITRK1, SLITRK6, FARP1, SPTB, RPS6KA5, SEMA6D, NPTN, CHRNA3, SEMA4B, DOK4, TUBB3, TUBB3, ULK2, OMG, GRB7, MYH10, NTN1, CDH2, EPB41L3, PTPRM, APOE, SEMA6B, LRRC4B, CACNG7, NTNG1, CELSR2, AMIGO1, NGF, DRAXIN, PDPN, CH…	any
GO:0008283	cell population proliferation	GO:BP	7.46e-10	2038	196	ENSG00000165757, ENSG00000099250, ENSG00000122861, ENSG00000108175, ENSG00000064201, ENSG00000185885, ENSG00000110492, ENSG00000133321, ENSG00000168056, ENSG00000175592, ENSG00000166341, ENSG00000111252, ENSG00000188906, ENSG00000186897, ENSG00000139567, ENSG00000167779, ENSG00000149948, ENSG00000139323, ENSG00000133639, ENSG00000102524, ENSG00000102760, ENSG00000136160, ENSG00000182809, ENSG0000…	KIAA1462, NRP1, PLAU, ZMIZ1, TSPAN32, IFITM1, MDK, RARRES3, LTBP3, FOSL1, DCHS1, SH2B3, LRRK2, C1QL4, ACVRL1, IGFBP6, HMGA2, POC1B, BTG1, TNFSF13B, RGCC, EDNRB, CRIP2, MMP14, RIPK3, GNG2, LGALS3, ZFP36L1, SPINT1, SHC4, FGF7, SMAD3, NOX5, NMB, SSTR5, CORO1A, PYCARD, ITGAX, TFAP4, MMP2, GPR56, HSF4, SERPINF1, LGALS9, CCL2, NR1D1, JUP, STAT5A, GFAP, HOXB4, ACE, SOX9, SPHK1, TNFSF13, SERPINB3, JUNB, …	upregulated
GO:0071944	cell periphery	GO:CC	8.19e-10	5732	437	ENSG00000198873, ENSG00000203805, ENSG00000066468, ENSG00000148848, ENSG00000068383, ENSG00000099246, ENSG00000150054, ENSG00000095739, ENSG00000204176, ENSG00000204174, ENSG00000198964, ENSG00000072422, ENSG00000099282, ENSG00000107738, ENSG00000108219, ENSG00000152779, ENSG00000176273, ENSG00000155629, ENSG00000137710, ENSG00000109846, ENSG00000182985, ENSG00000076706, ENSG00000149403, ENSG0000…	GRK5, PPAPDC1A, FGFR2, ADAM12, INPP5A, RAB18, MPP7, BAMBI, SYT15, NPY4R, SGMS1, RHOBTB1, TSPAN15, C10orf54, TSPAN14, SLC16A12, SLC35G1, PIK3AP1, RDX, CRYAB, CADM1, MCAM, GRIK4, SORL1, KIRREL3, RRAS2, ANO5, LGR4, PKP3, OR51E2, RASGRP2, EHD1, CST6, SLC29A2, LRP5, FOLR1, MTMR2, CNTN5, ANO4, GABARAPL1, STYK1, STX2, GSG1, PTPRO, PKP2, KIF21A, CNTN1, SLC38A1, SCN8A, ERBB3, ANO2, GRIP1, BEST3, PTPRR, PA…	downregulated
GO:0046903	secretion	GO:BP	8.34e-10	1709	293	ENSG00000151651, ENSG00000099246, ENSG00000170759, ENSG00000204176, ENSG00000122862, ENSG00000156026, ENSG00000122861, ENSG00000108219, ENSG00000148677, ENSG00000133805, ENSG00000182985, ENSG00000137642, ENSG00000198168, ENSG00000205213, ENSG00000176697, ENSG00000026508, ENSG00000019505, ENSG00000110492, ENSG00000167332, ENSG00000121236, ENSG00000149131, ENSG00000011347, ENSG00000149781, ENSG0000…	ADAM8, RAB18, KIF5B, SYT15, SRGN, MCU, PLAU, TSPAN14, ANKRD1, AMPD3, CADM1, SORL1, SVIP, LGR4, BDNF, CD44, SYT13, MDK, OR51E2, TRIM6, SERPING1, SYT7, FERMT3, NRXN2, LRP5, CRY1, HVCN1, OAS2, STX2, C12orf39, LRMP, LRRK2, RAPGEF3, ERBB3, LIN7A, PPFIA2, C3AR1, A2M, TNFSF13B, GAS6, POSTN, RGCC, HTR2A, EDNRB, STXBP6, LGALS3, SYT16, ACTN1, LTBP2, GPR68, SERPINA1, BDKRB2, PCSK6, THBS1, FGF7, NOX5, ISLR, …	any
GO:0022610	biological adhesion	GO:BP	9.32e-10	1447	150	ENSG00000148848, ENSG00000148484, ENSG00000107968, ENSG00000107738, ENSG00000137710, ENSG00000150782, ENSG00000182985, ENSG00000160588, ENSG00000076706, ENSG00000137699, ENSG00000154127, ENSG00000149571, ENSG00000184363, ENSG00000149972, ENSG00000074590, ENSG00000151490, ENSG00000057294, ENSG00000018236, ENSG00000065361, ENSG00000177425, ENSG00000074527, ENSG00000183087, ENSG00000118946, ENSG0000…	ADAM12, RSU1, MAP3K8, C10orf54, RDX, IL18, CADM1, MPZL3, MCAM, TRIM29, UBASH3B, KIRREL3, PKP3, CNTN5, NUAK1, PTPRO, PKP2, CNTN1, ERBB3, PAWR, NTN4, GAS6, PCDH17, AJUBA, STXBP6, FERMT2, BMP4, ACTN1, TJP1, THBS1, TMOD3, TPM1, NPTN, ACAN, ARHGDIG, CHST4, MSLN, ABAT, ITGAE, DUSP3, SDK2, UNC13D, MYH10, NTN1, CDH2, DSG2, MYL12A, PTPRM, TWSG1, PVR, LRRC4B, FSTL3, CAMSAP3, CELSR2, AMIGO1, PDPN, PIP5K1A, …	downregulated
GO:0051240	positive regulation of multicellular organismal process	GO:BP	1e-09	1853	182	ENSG00000099194, ENSG00000151651, ENSG00000165757, ENSG00000099250, ENSG00000165731, ENSG00000107984, ENSG00000108175, ENSG00000080854, ENSG00000185885, ENSG00000110492, ENSG00000124920, ENSG00000133321, ENSG00000168056, ENSG00000089250, ENSG00000188906, ENSG00000079337, ENSG00000139567, ENSG00000135426, ENSG00000135407, ENSG00000149948, ENSG00000171860, ENSG00000070961, ENSG00000133639, ENSG0000…	SCD, ADAM8, KIAA1462, NRP1, RET, DKK1, ZMIZ1, IGSF9B, IFITM1, MDK, MYRF, RARRES3, LTBP3, NOS1, LRRK2, RAPGEF3, ACVRL1, TESPA1, AVIL, HMGA2, C3AR1, ATP2B1, BTG1, POSTN, RGCC, EDNRB, SLITRK1, SLITRK6, MMP14, ZFP36L1, FOS, DIO2, GPR68, SPINT1, FGF7, SMAD3, STX1B, PYCARD, ITGAX, IRX3, SCARF1, ADORA2B, SERPINF1, RNF112, LGALS9, EVI2B, TRPV1, KRT17, JUP, DHX58, STAT5A, GFAP, HOXB7, MMD, SOX9, SPHK1, TN…	upregulated
GO:0007399	nervous system development	GO:BP	1.2e-09	2432	221	ENSG00000066468, ENSG00000151640, ENSG00000099246, ENSG00000170759, ENSG00000148677, ENSG00000150787, ENSG00000137642, ENSG00000149571, ENSG00000110693, ENSG00000176697, ENSG00000007372, ENSG00000110047, ENSG00000068971, ENSG00000110195, ENSG00000087053, ENSG00000149972, ENSG00000139767, ENSG00000135127, ENSG00000135097, ENSG00000151490, ENSG00000173208, ENSG00000018236, ENSG00000196876, ENSG0000…	FGFR2, DPYSL4, RAB18, KIF5B, ANKRD1, PTS, SORL1, KIRREL3, SOX6, BDNF, PAX6, EHD1, PPP2R5B, FOLR1, MTMR2, CNTN5, SRRM4, CCDC64, MSI1, PTPRO, ABCD2, CNTN1, SCN8A, ERBB3, GRIP1, PTPRQ, NTN4, MYO16, GAS6, FGF9, ATP8A2, WASF3, FRY, DCLK1, PCDH17, FARP1, NDRG2, MDGA2, BMP4, SPTB, MPP5, DPF3, CLMN, GABRA5, GABRB3, TMOD2, NPTN, RASGRF1, SH3GL3, ACAN, NR2F2, GPRC5B, SYNGR3, NKD1, DOK4, ABAT, PMP22, ULK2, …	downregulated
GO:0008092	cytoskeletal protein binding	GO:MF	1.21e-09	991	189	ENSG00000099204, ENSG00000188385, ENSG00000151640, ENSG00000078114, ENSG00000170759, ENSG00000138347, ENSG00000122367, ENSG00000148677, ENSG00000165887, ENSG00000137710, ENSG00000109846, ENSG00000149591, ENSG00000130592, ENSG00000149499, ENSG00000139354, ENSG00000139112, ENSG00000135127, ENSG00000139132, ENSG00000139116, ENSG00000188906, ENSG00000161791, ENSG00000155980, ENSG00000135407, ENSG0000…	ABLIM1, JAKMIP3, DPYSL4, NEBL, KIF5B, MYPN, LDB3, ANKRD1, ANKRD2, RDX, CRYAB, TAGLN, LSP1, EML3, GAS2L3, GABARAPL1, CCDC64, FGD4, KIF21A, LRRK2, FMNL3, KIF5A, AVIL, PAWR, MYO16, WASF3, KATNAL1, LCP1, DIAPH3, FARP1, AJUBA, CFL2, FERMT2, SPTB, ACTN1, LGMN, CLMN, SYNE3, FMN1, ACTC1, TMOD2, TMOD3, TPM1, FAM154B, SYNM, CORO1A, PYCARD, FHOD1, WDR90, COTL1, MYH8, MYH1, MYH2, MYH3, ALDOC, CORO6, FAM101B,…	any
GO:0030030	cell projection organization	GO:BP	1.27e-09	1578	274	ENSG00000099204, ENSG00000151892, ENSG00000066468, ENSG00000151640, ENSG00000170759, ENSG00000099250, ENSG00000165731, ENSG00000107984, ENSG00000122877, ENSG00000138347, ENSG00000107731, ENSG00000148677, ENSG00000187240, ENSG00000137710, ENSG00000154133, ENSG00000149571, ENSG00000176697, ENSG00000007372, ENSG00000026508, ENSG00000148948, ENSG00000110492, ENSG00000134569, ENSG00000110047, ENSG0000…	ABLIM1, GFRA1, FGFR2, DPYSL4, KIF5B, NRP1, RET, DKK1, EGR2, MYPN, UNC5B, ANKRD1, DYNC2H1, RDX, ROBO4, KIRREL3, BDNF, PAX6, CD44, LRRC4C, MDK, LRP4, EHD1, PPP2R5B, FOLR1, MTMR2, CCDC64, EMP1, PTPRO, FGD4, ABCD2, LRRK2, CNTN1, KIF5A, AVIL, GRIP1, RAB3IP, PPFIA2, POC1B, NTN4, C12orf55, MYO16, ATP8A2, WASF3, FRY, DCLK1, POSTN, KLF5, SLITRK1, SLITRK6, FARP1, AJUBA, SPTB, RPS6KA5, LGMN, CLMN, SEMA6D, G…	any
GO:0040012	regulation of locomotion	GO:BP	1.27e-09	1113	125	ENSG00000151651, ENSG00000165757, ENSG00000099250, ENSG00000165731, ENSG00000122861, ENSG00000154133, ENSG00000185885, ENSG00000110492, ENSG00000149781, ENSG00000176973, ENSG00000188906, ENSG00000139567, ENSG00000171860, ENSG00000011465, ENSG00000133110, ENSG00000102760, ENSG00000125245, ENSG00000157227, ENSG00000129465, ENSG00000131981, ENSG00000137872, ENSG00000140285, ENSG00000035664, ENSG0000…	ADAM8, KIAA1462, NRP1, RET, PLAU, ROBO4, IFITM1, MDK, FERMT3, FAM89B, LRRK2, ACVRL1, C3AR1, DCN, POSTN, RGCC, GPR18, MMP14, RIPK3, LGALS3, SEMA6D, FGF7, DAPK2, SMAD3, SEMA4B, CORO1A, PYCARD, ITGAX, GPR56, SERPINF1, LGALS9, CCL2, GRB7, JUP, STAT5A, ACE, SOX9, SPHK1, CYGB, SERPINB3, MIR27A, MIR23A, TGFB1, CEACAM1, SEMA6B, C5AR2, CSF1, PTPN22, TNFSF18, GLUL, PTGS2, PTPRC, PTPRU, TIE1, CYR61, RIN2, A…	upregulated
GO:0061448	connective tissue development	GO:BP	1.4e-09	281	76	ENSG00000165471, ENSG00000150347, ENSG00000107796, ENSG00000137745, ENSG00000137642, ENSG00000110693, ENSG00000026508, ENSG00000110492, ENSG00000168056, ENSG00000162337, ENSG00000062282, ENSG00000111341, ENSG00000139567, ENSG00000149948, ENSG00000102678, ENSG00000213145, ENSG00000125378, ENSG00000166949, ENSG00000157766, ENSG00000183688, ENSG00000168646, ENSG00000125398, ENSG00000101493, ENSG0000…	MBL2, ARID5B, ACTA2, MMP13, SORL1, SOX6, CD44, MDK, LTBP3, LRP5, DGAT2, MGP, ACVRL1, HMGA2, FGF9, CRIP1, BMP4, SMAD3, ACAN, FAM101B, AXIN2, SOX9, ZNF516, TGFB1, COL11A1, CSF1, VWA1, THBS3, PRRX1, CHI3L1, WNT9A, CYR61, GDF5, BMP2, COL6A1, COL6A2, GLI2, FRZB, SATB2, MATN3, COL6A3, RARB, PTH1R, HYAL3, RP5-966M1.6, WNT5A, FGF2, NKX3-2, SMAD1, RXFP1, FGFR3, PPARGC1A, CYTL1, BMP3, BMPR1B, TGFBI, EGR1, …	any
GO:0003012	muscle system process	GO:BP	1.45e-09	472	109	ENSG00000107796, ENSG00000165887, ENSG00000109846, ENSG00000089250, ENSG00000134548, ENSG00000057294, ENSG00000196465, ENSG00000092841, ENSG00000185482, ENSG00000070961, ENSG00000132932, ENSG00000102468, ENSG00000136160, ENSG00000168398, ENSG00000159251, ENSG00000128872, ENSG00000138594, ENSG00000140416, ENSG00000166949, ENSG00000080644, ENSG00000182253, ENSG00000087258, ENSG00000162004, ENSG0000…	ACTA2, ANKRD2, CRYAB, NOS1, C12orf39, PKP2, MYL6B, MYL6, STAC3, ATP2B1, ATP8A2, HTR2A, EDNRB, BDKRB2, ACTC1, TMOD2, TMOD3, TPM1, SMAD3, CHRNA3, SYNM, GNAO1, CCDC78, ABAT, MYH8, MYH1, MYH2, MYH3, ADORA2B, KCNJ12, TRPV1, JUP, SPHK1, GAA, DSG2, MYOM1, MYL12A, MYL12B, CNN1, MIR23A, MYH14, TNFRSF1B, CHRNB2, NOS1AP, RGS4, RCSD1, ATP1B1, PTGS2, RGS2, TNNT2, TNNI1, LMOD1, ADORA1, AGT, HTR1D, ACTN2, CHRM3…	any
GO:0042221	response to chemical	GO:BP	1.89e-09	4897	387	ENSG00000099194, ENSG00000065621, ENSG00000151892, ENSG00000151651, ENSG00000107611, ENSG00000165757, ENSG00000099250, ENSG00000165731, ENSG00000107984, ENSG00000150347, ENSG00000122877, ENSG00000138347, ENSG00000107731, ENSG00000122861, ENSG00000108175, ENSG00000184719, ENSG00000137745, ENSG00000050165, ENSG00000023171, ENSG00000154133, ENSG00000198168, ENSG00000176971, ENSG00000185201, ENSG0000…	SCD, GSTO2, GFRA1, ADAM8, CUBN, KIAA1462, NRP1, RET, DKK1, ARID5B, EGR2, MYPN, UNC5B, PLAU, ZMIZ1, RNLS, MMP13, DKK3, GRAMD1B, ROBO4, SVIP, FIBIN, IFITM2, IFITM1, IFITM3, CD44, SIGIRR, SYT13, MDK, HBE1, AC104389.28, HBG2, SYT7, LTBP3, FAM89B, FOSL1, TPP1, DGAT2, HVCN1, SH2B3, TAS2R30, OAS1, OAS2, NOS1, OASL, LRRK2, RAPGEF3, ACVRL1, KIF5A, HMGA2, C3AR1, DUSP6, ATP2B1, DCN, TNFSF13B, TNFRSF19, POST…	upregulated
GO:0045595	regulation of cell differentiation	GO:BP	1.92e-09	1932	322	ENSG00000066468, ENSG00000151651, ENSG00000148803, ENSG00000095739, ENSG00000099250, ENSG00000165731, ENSG00000107984, ENSG00000107738, ENSG00000108175, ENSG00000148677, ENSG00000165887, ENSG00000150782, ENSG00000137642, ENSG00000154127, ENSG00000110693, ENSG00000176697, ENSG00000185885, ENSG00000007372, ENSG00000148948, ENSG00000110492, ENSG00000134569, ENSG00000121236, ENSG00000133317, ENSG0000…	FGFR2, ADAM8, FUOM, BAMBI, NRP1, RET, DKK1, C10orf54, ZMIZ1, ANKRD1, ANKRD2, IL18, SORL1, UBASH3B, SOX6, BDNF, IFITM1, PAX6, LRRC4C, MDK, LRP4, TRIM6, LGALS12, RARRES3, EHD1, PPP2R5B, LTBP3, LRP5, NOS1, PTPRO, BHLHE41, PKP2, LRRK2, CNTN1, C1QL4, ACVRL1, TESPA1, AVIL, GRIP1, PPFIA2, BTG1, GAS6, FGF9, ATP8A2, CDX2, POSTN, RGCC, HTR2A, KLF5, EDNRB, SLITRK1, MMP14, BMP4, LGALS3, ZFP36L1, SMOC1, FOS, …	any
GO:0050767	regulation of neurogenesis	GO:BP	1.92e-09	856	169	ENSG00000148803, ENSG00000099250, ENSG00000165731, ENSG00000107984, ENSG00000148677, ENSG00000137642, ENSG00000176697, ENSG00000007372, ENSG00000148948, ENSG00000110492, ENSG00000134569, ENSG00000110047, ENSG00000068971, ENSG00000089250, ENSG00000151490, ENSG00000123095, ENSG00000188906, ENSG00000018236, ENSG00000135407, ENSG00000155974, ENSG00000139220, ENSG00000132932, ENSG00000136160, ENSG0000…	FUOM, NRP1, RET, DKK1, ANKRD1, SORL1, BDNF, PAX6, LRRC4C, MDK, LRP4, EHD1, PPP2R5B, NOS1, PTPRO, BHLHE41, LRRK2, CNTN1, AVIL, GRIP1, PPFIA2, ATP8A2, EDNRB, SLITRK1, BMP4, SPINT1, SEMA6D, NPTN, CHRNA3, SH3GL3, SEMA4B, GPRC5B, STX1B, IRX3, GPR56, PMP22, SCARF1, SERPINF1, RNF112, ULK2, OMG, NR1D1, GFAP, MMD, SOX9, HES7, NTN1, CDH2, DLL3, TGFB1, APOE, SEMA6B, LRRC4B, CACNG7, AMIGO1, CSF1, NGF, DRAXIN…	any
GO:0051049	regulation of transport	GO:BP	1.96e-09	1947	324	ENSG00000203805, ENSG00000151651, ENSG00000170759, ENSG00000099250, ENSG00000204176, ENSG00000107984, ENSG00000165471, ENSG00000122862, ENSG00000156026, ENSG00000148677, ENSG00000137710, ENSG00000109846, ENSG00000182985, ENSG00000137642, ENSG00000154127, ENSG00000198168, ENSG00000205213, ENSG00000135362, ENSG00000019505, ENSG00000110492, ENSG00000167332, ENSG00000121236, ENSG00000011347, ENSG0000…	PPAPDC1A, ADAM8, KIF5B, NRP1, SYT15, DKK1, MBL2, SRGN, MCU, ANKRD1, RDX, CRYAB, CADM1, SORL1, UBASH3B, SVIP, LGR4, PRR5L, SYT13, MDK, OR51E2, TRIM6, SYT7, AHNAK, EHD1, CNIH2, LRP5, MTMR2, CRY1, HVCN1, OAS2, NOS1, CACNA2D4, C12orf39, DENND5B, PKP2, LRRK2, CNTN1, RAPGEF3, SCN8A, ERBB3, STAC3, BEST3, PPFIA2, ATP2B1, GAS6, ATP8A2, POSTN, RGCC, LCP1, HTR2A, PCDH17, EDNRB, NDFIP2, CLDN10, STXBP6, BMP4,…	any
GO:0035556	intracellular signal transduction	GO:BP	2.13e-09	2896	450	ENSG00000107554, ENSG00000138166, ENSG00000151892, ENSG00000066468, ENSG00000068383, ENSG00000151651, ENSG00000099246, ENSG00000165757, ENSG00000107968, ENSG00000099250, ENSG00000177283, ENSG00000165731, ENSG00000128805, ENSG00000198964, ENSG00000107984, ENSG00000072422, ENSG00000107731, ENSG00000156026, ENSG00000148677, ENSG00000155629, ENSG00000165887, ENSG00000137710, ENSG00000109846, ENSG0000…	DNMBP, DUSP5, GFRA1, FGFR2, INPP5A, ADAM8, RAB18, KIAA1462, MAP3K8, NRP1, FZD8, RET, ARHGAP22, SGMS1, DKK1, RHOBTB1, UNC5B, MCU, ANKRD1, PIK3AP1, ANKRD2, RDX, CRYAB, IL18, SORL1, RRAS2, DUSP8, FIBIN, LGR4, DEPDC7, CD44, PRR5L, OR51E2, LGALS12, RASGRP2, PPP2R5B, DCHS1, PIDD, NUAK1, SH2B3, NOS1, WSB2, DUSP16, FGD4, LRRK2, RAPGEF3, C1QL4, ERBB3, STAC3, PLEKHG6, GRIP1, PTPRR, DUSP6, DCN, A2M, MYO16, …	any
GO:0015629	actin cytoskeleton	GO:CC	2.16e-09	517	114	ENSG00000099204, ENSG00000151651, ENSG00000078114, ENSG00000122367, ENSG00000107796, ENSG00000137710, ENSG00000109846, ENSG00000130592, ENSG00000124942, ENSG00000149781, ENSG00000139354, ENSG00000079337, ENSG00000196465, ENSG00000092841, ENSG00000135407, ENSG00000177425, ENSG00000041515, ENSG00000102755, ENSG00000136167, ENSG00000165410, ENSG00000073712, ENSG00000070182, ENSG00000072110, ENSG0000…	ABLIM1, ADAM8, NEBL, LDB3, ACTA2, RDX, CRYAB, LSP1, AHNAK, FERMT3, GAS2L3, RAPGEF3, MYL6B, MYL6, AVIL, PAWR, MYO16, FLT1, LCP1, CFL2, FERMT2, SPTB, ACTN1, TJP1, FMN1, ACTC1, TMOD2, TMOD3, CGNL1, MYZAP, TPM1, CORO1A, FHOD1, COTL1, MYH8, MYH1, MYH2, MYH3, SPECC1, FAM101B, TAX1BP3, JUP, SLC9A3R1, LLGL2, MYO15B, FSCN2, MYH10, CDH2, MYOM1, MYL12A, MYL12B, FHOD3, MYH14, VCAM1, CGN, RCSD1, ARPC5, TNNT2,…	any
GO:0003779	actin binding	GO:MF	2.16e-09	433	101	ENSG00000099204, ENSG00000078114, ENSG00000138347, ENSG00000122367, ENSG00000137710, ENSG00000149591, ENSG00000130592, ENSG00000139354, ENSG00000139132, ENSG00000188906, ENSG00000161791, ENSG00000135407, ENSG00000177425, ENSG00000041515, ENSG00000132970, ENSG00000136167, ENSG00000139734, ENSG00000129474, ENSG00000165410, ENSG00000073712, ENSG00000070182, ENSG00000072110, ENSG00000165959, ENSG0000…	ABLIM1, NEBL, MYPN, LDB3, RDX, TAGLN, LSP1, GAS2L3, FGD4, LRRK2, FMNL3, AVIL, PAWR, MYO16, WASF3, LCP1, DIAPH3, AJUBA, CFL2, FERMT2, SPTB, ACTN1, CLMN, SYNE3, FMN1, TMOD2, TMOD3, TPM1, CORO1A, FHOD1, COTL1, MYH8, MYH1, MYH2, MYH3, CORO6, FMNL1, MYO15B, FSCN2, MYH10, MYOM1, FHOD3, EPB41L3, CNN1, GIPC1, CEACAM1, MYH14, CAMSAP3, CGN, S100A4, RCSD1, ARPC5, TNNT2, TNNI1, LMOD1, ACTN2, EPB41, NEXN, GBP…	any
GO:0006935	chemotaxis	GO:BP	2.18e-09	649	137	ENSG00000151892, ENSG00000151640, ENSG00000151651, ENSG00000170759, ENSG00000099250, ENSG00000165731, ENSG00000122877, ENSG00000138347, ENSG00000107731, ENSG00000156026, ENSG00000122861, ENSG00000154133, ENSG00000176697, ENSG00000007372, ENSG00000110492, ENSG00000175592, ENSG00000151490, ENSG00000155980, ENSG00000171860, ENSG00000074527, ENSG00000183087, ENSG00000102755, ENSG00000136160, ENSG0000…	GFRA1, DPYSL4, ADAM8, KIF5B, NRP1, RET, EGR2, MYPN, UNC5B, MCU, PLAU, ROBO4, BDNF, PAX6, MDK, FOSL1, PTPRO, KIF5A, C3AR1, NTN4, GAS6, FLT1, EDNRB, GPR18, BMP4, LGALS3, SPTB, RPS6KA5, LGMN, THBS1, SEMA6D, FGF7, DAPK2, SMAD3, NPTN, IL16, SEMA4B, CORO1A, HSD3B7, DOK4, TUBB3, TUBB3, LGALS9, CCL2, GRB7, DUSP3, MYH10, NTN1, PTPRM, EMR2, SEMA6B, C5AR2, VAV3, CSF1, DRAXIN, PIP5K1A, RAB13, SHC1, EFNA1, FC…	any
GO:0030029	actin filament-based process	GO:BP	2.2e-09	781	96	ENSG00000078114, ENSG00000072422, ENSG00000156026, ENSG00000122367, ENSG00000148677, ENSG00000137710, ENSG00000139354, ENSG00000139132, ENSG00000057294, ENSG00000196465, ENSG00000092841, ENSG00000177425, ENSG00000132970, ENSG00000136167, ENSG00000139734, ENSG00000152767, ENSG00000165410, ENSG00000070182, ENSG00000072110, ENSG00000140030, ENSG00000104067, ENSG00000159251, ENSG00000128872, ENSG0000…	NEBL, RHOBTB1, MCU, LDB3, ANKRD1, RDX, GAS2L3, FGD4, PKP2, MYL6B, MYL6, PAWR, WASF3, LCP1, DIAPH3, FARP1, CFL2, SPTB, ACTN1, GPR65, TJP1, ACTC1, TMOD2, TMOD3, CGNL1, TPM1, COTL1, MYH8, MYH2, MYH3, SPECC1, FAM101B, SLC9A3R1, LLGL2, MYH10, DSG2, MYOM1, FHOD3, EPB41L3, CNN1, MYH14, PDPN, PIP5K1A, ARHGEF10L, ARPC5, TNNT2, TNNI1, CSRP1, LMOD1, ADORA1, NUAK2, PDE4B, CNN3, DSTN, SNTA1, TRPM2, BCR, LIMK2…	downregulated
GO:0030054	cell junction	GO:CC	2.3e-09	1327	138	ENSG00000148484, ENSG00000150054, ENSG00000137710, ENSG00000204381, ENSG00000182985, ENSG00000076706, ENSG00000149403, ENSG00000133818, ENSG00000184363, ENSG00000068831, ENSG00000057294, ENSG00000196876, ENSG00000155974, ENSG00000153233, ENSG00000102755, ENSG00000136167, ENSG00000102468, ENSG00000178695, ENSG00000152767, ENSG00000129474, ENSG00000073712, ENSG00000020577, ENSG00000072415, ENSG0000…	RSU1, MPP7, RDX, LAYN, CADM1, MCAM, GRIK4, RRAS2, PKP3, RASGRP2, PKP2, SCN8A, GRIP1, PTPRR, FLT1, LCP1, HTR2A, KCTD12, FARP1, AJUBA, FERMT2, SAMD4A, MPP5, ACTN1, GABRA5, GABRB3, TJP1, ACTC1, CGNL1, MYZAP, NPTN, C15orf59, SYNM, SHISA9, SYNGR3, GSG1L, MARVELD3, MYH1, MYH2, PMP22, PLXDC1, MPP2, SDK2, CDH2, DSG2, EPB41L3, PTPRM, OLFM2, CNN1, WTIP, ATCAY, PVR, LIN7B, LRRC4B, PALM, CAMSAP3, PALMD, PDPN…	downregulated
GO:0009887	animal organ morphogenesis	GO:BP	2.52e-09	1095	204	ENSG00000099204, ENSG00000107518, ENSG00000066468, ENSG00000099250, ENSG00000165512, ENSG00000107984, ENSG00000165471, ENSG00000150347, ENSG00000108175, ENSG00000107796, ENSG00000148677, ENSG00000137745, ENSG00000151702, ENSG00000205213, ENSG00000176697, ENSG00000007372, ENSG00000110492, ENSG00000134569, ENSG00000149489, ENSG00000168056, ENSG00000166341, ENSG00000162337, ENSG00000110195, ENSG0000…	ABLIM1, ATRNL1, FGFR2, NRP1, ZNF22, DKK1, MBL2, ARID5B, ZMIZ1, ACTA2, ANKRD1, MMP13, FLI1, LGR4, BDNF, PAX6, MDK, LRP4, ROM1, LTBP3, DCHS1, LRP5, FOLR1, STX2, MGP, PKP2, LRRK2, ACVRL1, HOXC13, NAB2, LRIG3, PTPRQ, DCN, NTN4, FGF9, ATP8A2, CDX2, SLITRK6, GPC6, CRIP1, MMP14, BMP4, FOXN3, FMN1, ACTC1, FGF7, WDR72, TPM1, SMAD3, ACAN, ITGAX, NKD1, IRX3, MMP2, PARD6A, FAM101B, CCL2, WNK4, CCDC103, HOXB4…	any
GO:0001568	blood vessel development	GO:BP	2.65e-09	784	97	ENSG00000151651, ENSG00000165757, ENSG00000099250, ENSG00000177283, ENSG00000128805, ENSG00000107731, ENSG00000108175, ENSG00000187240, ENSG00000154133, ENSG00000110492, ENSG00000175592, ENSG00000079337, ENSG00000161791, ENSG00000139567, ENSG00000149948, ENSG00000171860, ENSG00000011465, ENSG00000133639, ENSG00000102760, ENSG00000157227, ENSG00000185650, ENSG00000140199, ENSG00000166145, ENSG0000…	ADAM8, KIAA1462, NRP1, FZD8, ARHGAP22, UNC5B, ZMIZ1, DYNC2H1, ROBO4, MDK, FOSL1, RAPGEF3, FMNL3, ACVRL1, HMGA2, C3AR1, DCN, BTG1, RGCC, MMP14, ZFP36L1, SLC12A6, SPINT1, NOX5, ANPEP, ITGAX, MMP2, GPR56, SERPINF1, CCL2, JUP, DLX3, SPHK1, RNF213, JUNB, MIR27A, MIR23A, TGFB1, CEACAM1, LRG1, C3, VAV3, SHC1, PRRX1, GLUL, PTGS2, CHI3L1, COL8A2, TIE1, CYR61, ISM1, RIN2, FAP, CALCRL, FN1, SCG2, EMILIN1, T…	upregulated
GO:0042330	taxis	GO:BP	2.77e-09	651	137	ENSG00000151892, ENSG00000151640, ENSG00000151651, ENSG00000170759, ENSG00000099250, ENSG00000165731, ENSG00000122877, ENSG00000138347, ENSG00000107731, ENSG00000156026, ENSG00000122861, ENSG00000154133, ENSG00000176697, ENSG00000007372, ENSG00000110492, ENSG00000175592, ENSG00000151490, ENSG00000155980, ENSG00000171860, ENSG00000074527, ENSG00000183087, ENSG00000102755, ENSG00000136160, ENSG0000…	GFRA1, DPYSL4, ADAM8, KIF5B, NRP1, RET, EGR2, MYPN, UNC5B, MCU, PLAU, ROBO4, BDNF, PAX6, MDK, FOSL1, PTPRO, KIF5A, C3AR1, NTN4, GAS6, FLT1, EDNRB, GPR18, BMP4, LGALS3, SPTB, RPS6KA5, LGMN, THBS1, SEMA6D, FGF7, DAPK2, SMAD3, NPTN, IL16, SEMA4B, CORO1A, HSD3B7, DOK4, TUBB3, TUBB3, LGALS9, CCL2, GRB7, DUSP3, MYH10, NTN1, PTPRM, EMR2, SEMA6B, C5AR2, VAV3, CSF1, DRAXIN, PIP5K1A, RAB13, SHC1, EFNA1, FC…	any
GO:0001944	vasculature development	GO:BP	2.77e-09	820	100	ENSG00000151651, ENSG00000165757, ENSG00000099250, ENSG00000177283, ENSG00000128805, ENSG00000107731, ENSG00000108175, ENSG00000187240, ENSG00000154133, ENSG00000110492, ENSG00000149489, ENSG00000175592, ENSG00000079337, ENSG00000161791, ENSG00000139567, ENSG00000149948, ENSG00000171860, ENSG00000011465, ENSG00000133639, ENSG00000102760, ENSG00000157227, ENSG00000185650, ENSG00000140199, ENSG0000…	ADAM8, KIAA1462, NRP1, FZD8, ARHGAP22, UNC5B, ZMIZ1, DYNC2H1, ROBO4, MDK, ROM1, FOSL1, RAPGEF3, FMNL3, ACVRL1, HMGA2, C3AR1, DCN, BTG1, RGCC, MMP14, ZFP36L1, SLC12A6, SPINT1, NOX5, ANPEP, ITGAX, MMP2, GPR56, SERPINF1, CCL2, JUP, DLX3, SPHK1, RNF213, JUNB, MIR27A, MIR23A, TGFB1, CEACAM1, LRG1, C3, VAV3, SHC1, PRRX1, GLUL, PTGS2, CHI3L1, COL8A2, TIE1, ERRFI1, CYR61, ISM1, RIN2, NFATC2, FAP, CALCRL,…	upregulated
GO:0120036	plasma membrane bounded cell projection organization	GO:BP	2.92e-09	1539	267	ENSG00000099204, ENSG00000151892, ENSG00000066468, ENSG00000151640, ENSG00000170759, ENSG00000099250, ENSG00000165731, ENSG00000107984, ENSG00000122877, ENSG00000138347, ENSG00000107731, ENSG00000148677, ENSG00000187240, ENSG00000137710, ENSG00000154133, ENSG00000149571, ENSG00000176697, ENSG00000007372, ENSG00000026508, ENSG00000148948, ENSG00000110492, ENSG00000134569, ENSG00000110047, ENSG0000…	ABLIM1, GFRA1, FGFR2, DPYSL4, KIF5B, NRP1, RET, DKK1, EGR2, MYPN, UNC5B, ANKRD1, DYNC2H1, RDX, ROBO4, KIRREL3, BDNF, PAX6, CD44, LRRC4C, MDK, LRP4, EHD1, PPP2R5B, FOLR1, MTMR2, CCDC64, EMP1, PTPRO, FGD4, ABCD2, LRRK2, CNTN1, KIF5A, AVIL, GRIP1, RAB3IP, PPFIA2, POC1B, NTN4, C12orf55, MYO16, ATP8A2, WASF3, FRY, DCLK1, POSTN, KLF5, SLITRK1, SLITRK6, FARP1, AJUBA, SPTB, RPS6KA5, LGMN, CLMN, SEMA6D, G…	any
GO:0016021	integral component of membrane	GO:CC	2.98e-09	5692	432	ENSG00000099194, ENSG00000108018, ENSG00000197142, ENSG00000182022, ENSG00000151651, ENSG00000204740, ENSG00000120594, ENSG00000099250, ENSG00000177283, ENSG00000165731, ENSG00000107731, ENSG00000185742, ENSG00000166250, ENSG00000023171, ENSG00000149564, ENSG00000154133, ENSG00000134955, ENSG00000080854, ENSG00000064201, ENSG00000185201, ENSG00000185885, ENSG00000142089, ENSG00000110427, ENSG0000…	SCD, SORCS1, ACSL5, CHST15, ADAM8, MALRD1, PLXDC2, NRP1, FZD8, RET, UNC5B, C11orf87, CLMP, GRAMD1B, ESAM, ROBO4, SLC37A2, IGSF9B, TSPAN32, IFITM2, IFITM1, IFITM3, KIAA1549L, CD44, LRRC4C, SIGIRR, CD82, SYT13, LRP4, AC104389.28, ZP1, SYT7, MYRF, ROM1, RARRES3, NRXN2, CNIH2, DCHS1, DGAT2, KLRC4, KLRC4-KLRK1, KLRC3, NKG2-E, KLRC2, KLRC1, HVCN1, TAS2R30, NOS1, TMEM132B, GPRC5A, EMP1, CACNA2D4, LRMP, …	upregulated
GO:0005886	plasma membrane	GO:CC	3.22e-09	5604	426	ENSG00000198873, ENSG00000203805, ENSG00000066468, ENSG00000148848, ENSG00000068383, ENSG00000099246, ENSG00000150054, ENSG00000095739, ENSG00000204176, ENSG00000204174, ENSG00000198964, ENSG00000072422, ENSG00000099282, ENSG00000107738, ENSG00000108219, ENSG00000152779, ENSG00000176273, ENSG00000155629, ENSG00000137710, ENSG00000109846, ENSG00000182985, ENSG00000076706, ENSG00000149403, ENSG0000…	GRK5, PPAPDC1A, FGFR2, ADAM12, INPP5A, RAB18, MPP7, BAMBI, SYT15, NPY4R, SGMS1, RHOBTB1, TSPAN15, C10orf54, TSPAN14, SLC16A12, SLC35G1, PIK3AP1, RDX, CRYAB, CADM1, MCAM, GRIK4, SORL1, KIRREL3, RRAS2, ANO5, LGR4, PKP3, OR51E2, RASGRP2, EHD1, CST6, SLC29A2, LRP5, FOLR1, MTMR2, CNTN5, ANO4, GABARAPL1, STYK1, STX2, GSG1, PTPRO, PKP2, KIF21A, CNTN1, SLC38A1, SCN8A, ERBB3, ANO2, GRIP1, BEST3, PTPRR, PA…	downregulated
GO:0009966	regulation of signal transduction	GO:BP	3.32e-09	3244	494	ENSG00000107554, ENSG00000138166, ENSG00000198873, ENSG00000066468, ENSG00000019995, ENSG00000151651, ENSG00000150054, ENSG00000095739, ENSG00000165757, ENSG00000107968, ENSG00000099250, ENSG00000177283, ENSG00000165731, ENSG00000128805, ENSG00000198964, ENSG00000107984, ENSG00000072422, ENSG00000099282, ENSG00000107731, ENSG00000122861, ENSG00000108175, ENSG00000108219, ENSG00000148677, ENSG0000…	DNMBP, DUSP5, GRK5, FGFR2, ZRANB1, ADAM8, MPP7, BAMBI, KIAA1462, MAP3K8, NRP1, FZD8, RET, ARHGAP22, SGMS1, DKK1, RHOBTB1, TSPAN15, UNC5B, PLAU, ZMIZ1, TSPAN14, ANKRD1, PIK3AP1, ANKRD2, DYNC2H1, RDX, IL18, DKK3, SORL1, UBASH3B, IGSF9B, DUSP8, LGR4, BDNF, CDKN1C, DEPDC7, CD44, PRR5L, SIGIRR, MDK, LRP4, OR51E2, TRIM6, PPP2R5B, FAM89B, CNIH2, FOLR1, PIDD, MTMR2, NUAK1, CRY1, SH2B3, HRK, NOS1, DUSP16,…	any
GO:0051240	positive regulation of multicellular organismal process	GO:BP	3.52e-09	1853	310	ENSG00000099194, ENSG00000066468, ENSG00000148848, ENSG00000151651, ENSG00000095739, ENSG00000165757, ENSG00000099250, ENSG00000165731, ENSG00000107984, ENSG00000107738, ENSG00000108175, ENSG00000148677, ENSG00000150782, ENSG00000182985, ENSG00000137642, ENSG00000080854, ENSG00000110693, ENSG00000205213, ENSG00000176697, ENSG00000185885, ENSG00000007372, ENSG00000110492, ENSG00000167332, ENSG0000…	SCD, FGFR2, ADAM12, ADAM8, BAMBI, KIAA1462, NRP1, RET, DKK1, C10orf54, ZMIZ1, ANKRD1, IL18, CADM1, SORL1, IGSF9B, SOX6, LGR4, BDNF, IFITM1, PAX6, MDK, OR51E2, TRIM6, MYRF, RARRES3, EHD1, PPP2R5B, LTBP3, LRP5, NOS1, C12orf39, LRRK2, CNTN1, RAPGEF3, ACVRL1, TESPA1, ERBB3, AVIL, HMGA2, GRIP1, C3AR1, ATP2B1, BTG1, GAS6, FGF9, ATP8A2, WASF3, FLT1, POSTN, RGCC, HTR2A, EDNRB, SLITRK1, SLITRK6, MMP14, BM…	any
GO:0032990	cell part morphogenesis	GO:BP	3.56e-09	711	146	ENSG00000151892, ENSG00000066468, ENSG00000151640, ENSG00000170759, ENSG00000099250, ENSG00000165731, ENSG00000122877, ENSG00000138347, ENSG00000107731, ENSG00000154133, ENSG00000149571, ENSG00000176697, ENSG00000007372, ENSG00000026508, ENSG00000148948, ENSG00000110492, ENSG00000134569, ENSG00000151490, ENSG00000188906, ENSG00000155980, ENSG00000155974, ENSG00000139220, ENSG00000074527, ENSG0000…	GFRA1, FGFR2, DPYSL4, KIF5B, NRP1, RET, EGR2, MYPN, UNC5B, ROBO4, KIRREL3, BDNF, PAX6, CD44, LRRC4C, MDK, LRP4, PTPRO, LRRK2, KIF5A, GRIP1, PPFIA2, NTN4, MYO16, ATP8A2, DCLK1, POSTN, SLITRK1, SLITRK6, FARP1, SPTB, RPS6KA5, SEMA6D, NPTN, CHRNA3, SEMA4B, DOK4, TUBB3, TUBB3, ULK2, OMG, GRB7, MYH10, NTN1, CDH2, EPB41L3, PTPRM, APOE, SEMA6B, MYH14, LRRC4B, CACNG7, NTNG1, CELSR2, AMIGO1, NGF, DRAXIN, P…	any
GO:0008015	blood circulation	GO:BP	3.98e-09	553	121	ENSG00000184719, ENSG00000107796, ENSG00000151702, ENSG00000167332, ENSG00000149131, ENSG00000162337, ENSG00000089250, ENSG00000151490, ENSG00000151062, ENSG00000134548, ENSG00000057294, ENSG00000139567, ENSG00000171860, ENSG00000070961, ENSG00000183087, ENSG00000133110, ENSG00000102468, ENSG00000136160, ENSG00000131979, ENSG00000168398, ENSG00000104067, ENSG00000159251, ENSG00000140416, ENSG0000…	RNLS, ACTA2, FLI1, OR51E2, SERPING1, LRP5, NOS1, PTPRO, CACNA2D4, C12orf39, PKP2, ACVRL1, C3AR1, ATP2B1, GAS6, POSTN, HTR2A, EDNRB, GCH1, BDKRB2, TJP1, ACTC1, TPM1, SMAD3, NR2F2, GNAO1, ABAT, ADORA2B, KCNJ12, TRPV1, JUP, ACE, CACNG4, GAA, DSG2, PTPRM, MIR23A, CYP4F2, CEACAM1, APOE, KCNJ14, CACNG7, NOS1AP, RGS4, ATP1B1, PTGS2, RGS2, TNNT2, TNNI1, ADORA1, TGFB2, AGT, KCNK1, HTR1D, CHRM3, CYP2J2, PD…	any
GO:0120039	plasma membrane bounded cell projection morphogenesis	GO:BP	4.38e-09	687	142	ENSG00000151892, ENSG00000066468, ENSG00000151640, ENSG00000170759, ENSG00000099250, ENSG00000165731, ENSG00000122877, ENSG00000138347, ENSG00000107731, ENSG00000154133, ENSG00000149571, ENSG00000176697, ENSG00000007372, ENSG00000026508, ENSG00000148948, ENSG00000134569, ENSG00000151490, ENSG00000188906, ENSG00000155980, ENSG00000155974, ENSG00000139220, ENSG00000074527, ENSG00000041515, ENSG0000…	GFRA1, FGFR2, DPYSL4, KIF5B, NRP1, RET, EGR2, MYPN, UNC5B, ROBO4, KIRREL3, BDNF, PAX6, CD44, LRRC4C, LRP4, PTPRO, LRRK2, KIF5A, GRIP1, PPFIA2, NTN4, MYO16, ATP8A2, DCLK1, POSTN, SLITRK1, SLITRK6, FARP1, SPTB, RPS6KA5, SEMA6D, NPTN, CHRNA3, SEMA4B, DOK4, TUBB3, TUBB3, ULK2, OMG, GRB7, MYH10, NTN1, CDH2, EPB41L3, PTPRM, APOE, SEMA6B, LRRC4B, CACNG7, NTNG1, CELSR2, AMIGO1, NGF, DRAXIN, PDPN, CHRNB2,…	any
GO:0072358	cardiovascular system development	GO:BP	5.37e-09	829	100	ENSG00000151651, ENSG00000165757, ENSG00000099250, ENSG00000177283, ENSG00000128805, ENSG00000107731, ENSG00000108175, ENSG00000187240, ENSG00000154133, ENSG00000110492, ENSG00000149489, ENSG00000175592, ENSG00000079337, ENSG00000161791, ENSG00000139567, ENSG00000149948, ENSG00000171860, ENSG00000011465, ENSG00000133639, ENSG00000102760, ENSG00000157227, ENSG00000185650, ENSG00000140199, ENSG0000…	ADAM8, KIAA1462, NRP1, FZD8, ARHGAP22, UNC5B, ZMIZ1, DYNC2H1, ROBO4, MDK, ROM1, FOSL1, RAPGEF3, FMNL3, ACVRL1, HMGA2, C3AR1, DCN, BTG1, RGCC, MMP14, ZFP36L1, SLC12A6, SPINT1, NOX5, ANPEP, ITGAX, MMP2, GPR56, SERPINF1, CCL2, JUP, DLX3, SPHK1, RNF213, JUNB, MIR27A, MIR23A, TGFB1, CEACAM1, LRG1, C3, VAV3, SHC1, PRRX1, GLUL, PTGS2, CHI3L1, COL8A2, TIE1, ERRFI1, CYR61, ISM1, RIN2, NFATC2, FAP, CALCRL,…	upregulated
GO:0030029	actin filament-based process	GO:BP	5.97e-09	781	156	ENSG00000078114, ENSG00000099250, ENSG00000072422, ENSG00000138347, ENSG00000156026, ENSG00000122367, ENSG00000148677, ENSG00000137710, ENSG00000149564, ENSG00000110492, ENSG00000139354, ENSG00000139132, ENSG00000057294, ENSG00000079337, ENSG00000161791, ENSG00000196465, ENSG00000092841, ENSG00000135407, ENSG00000177425, ENSG00000132970, ENSG00000102760, ENSG00000136167, ENSG00000139734, ENSG0000…	NEBL, NRP1, RHOBTB1, MYPN, MCU, LDB3, ANKRD1, RDX, ESAM, MDK, GAS2L3, FGD4, PKP2, RAPGEF3, FMNL3, MYL6B, MYL6, AVIL, PAWR, WASF3, RGCC, LCP1, DIAPH3, FARP1, EFS, CFL2, SPTB, ACTN1, GPR65, TJP1, FMN1, ACTC1, FGF7, TMOD2, TMOD3, CGNL1, TPM1, SMAD3, CORO1A, PYCARD, FHOD1, COTL1, MYH8, MYH2, MYH3, SPECC1, CORO6, FAM101B, JUP, FMNL1, SLC9A3R1, LLGL2, FSCN2, MYH10, DSG2, MYOM1, FHOD3, SIGLEC15, EPB41L3…	any
GO:0003013	circulatory system process	GO:BP	6.43e-09	563	122	ENSG00000184719, ENSG00000107796, ENSG00000151702, ENSG00000167332, ENSG00000149131, ENSG00000162337, ENSG00000089250, ENSG00000151490, ENSG00000151062, ENSG00000134548, ENSG00000057294, ENSG00000139567, ENSG00000171860, ENSG00000070961, ENSG00000183087, ENSG00000133110, ENSG00000102468, ENSG00000136160, ENSG00000131979, ENSG00000168398, ENSG00000104067, ENSG00000159251, ENSG00000140416, ENSG0000…	RNLS, ACTA2, FLI1, OR51E2, SERPING1, LRP5, NOS1, PTPRO, CACNA2D4, C12orf39, PKP2, ACVRL1, C3AR1, ATP2B1, GAS6, POSTN, HTR2A, EDNRB, GCH1, BDKRB2, TJP1, ACTC1, TPM1, SMAD3, NR2F2, GNAO1, ABAT, ADORA2B, KCNJ12, TRPV1, JUP, ACE, CACNG4, GAA, DSG2, PTPRM, MIR23A, CYP4F2, CEACAM1, APOE, KCNJ14, CACNG7, NOS1AP, RGS4, ATP1B1, PTGS2, RGS2, TNNT2, TNNI1, ADORA1, TGFB2, AGT, KCNK1, HTR1D, CHRM3, CYP2J2, PD…	any
GO:0048468	cell development	GO:BP	6.56e-09	2215	203	ENSG00000066468, ENSG00000151640, ENSG00000078114, ENSG00000170759, ENSG00000122367, ENSG00000107796, ENSG00000148677, ENSG00000137710, ENSG00000137642, ENSG00000149571, ENSG00000110693, ENSG00000176697, ENSG00000007372, ENSG00000110047, ENSG00000068971, ENSG00000162337, ENSG00000110195, ENSG00000087053, ENSG00000139767, ENSG00000135127, ENSG00000151490, ENSG00000018236, ENSG00000177990, ENSG0000…	FGFR2, DPYSL4, NEBL, KIF5B, LDB3, ACTA2, ANKRD1, RDX, SORL1, KIRREL3, SOX6, BDNF, PAX6, EHD1, PPP2R5B, LRP5, FOLR1, MTMR2, SRRM4, CCDC64, PTPRO, CNTN1, DPY19L2, GRIP1, PTPRQ, NTN4, MYO16, ATP8A2, WASF3, FRY, DCLK1, KLF5, FARP1, CFL2, FERMT2, BMP4, SPTB, MPP5, ACTN1, CLMN, GABRA5, GABRB3, TJP1, ACTC1, TMOD2, TMOD3, TPM1, NPTN, RASGRF1, SH3GL3, ALPK3, ACAN, GPRC5B, DOK4, MYH3, PMP22, ULK2, FAM101B,…	downregulated
GO:0000904	cell morphogenesis involved in differentiation	GO:BP	6.75e-09	769	154	ENSG00000151892, ENSG00000066468, ENSG00000170759, ENSG00000099250, ENSG00000165731, ENSG00000107984, ENSG00000165471, ENSG00000122877, ENSG00000138347, ENSG00000107731, ENSG00000154133, ENSG00000176697, ENSG00000007372, ENSG00000148948, ENSG00000110492, ENSG00000134569, ENSG00000149781, ENSG00000151490, ENSG00000188906, ENSG00000139626, ENSG00000155980, ENSG00000139304, ENSG00000139220, ENSG0000…	GFRA1, FGFR2, KIF5B, NRP1, RET, DKK1, MBL2, EGR2, MYPN, UNC5B, ROBO4, BDNF, PAX6, LRRC4C, MDK, LRP4, FERMT3, PTPRO, LRRK2, ITGB7, KIF5A, PTPRQ, PPFIA2, NTN4, ATP8A2, DCLK1, POSTN, SLITRK1, SLITRK6, FARP1, FERMT2, SPTB, ACTN1, RPS6KA5, SEMA6D, NPTN, CHRNA3, SEMA4B, DOK4, TUBB3, TUBB3, ULK2, OMG, GRB7, SLC9A3R1, UNC13D, MYH10, NTN1, CDH2, PTPRM, APOE, SEMA6B, LRRC4B, NTNG1, CELSR2, AMIGO1, NGF, DRA…	any
GO:0035239	tube morphogenesis	GO:BP	7.96e-09	944	180	ENSG00000066468, ENSG00000148848, ENSG00000151651, ENSG00000165757, ENSG00000099250, ENSG00000177283, ENSG00000165731, ENSG00000128805, ENSG00000107731, ENSG00000108175, ENSG00000150782, ENSG00000076706, ENSG00000154133, ENSG00000109854, ENSG00000205213, ENSG00000110492, ENSG00000166341, ENSG00000162337, ENSG00000110195, ENSG00000079337, ENSG00000161791, ENSG00000139567, ENSG00000149948, ENSG0000…	FGFR2, ADAM12, ADAM8, KIAA1462, NRP1, FZD8, RET, ARHGAP22, UNC5B, ZMIZ1, IL18, MCAM, ROBO4, HTATIP2, LGR4, MDK, DCHS1, LRP5, FOLR1, RAPGEF3, FMNL3, ACVRL1, HMGA2, C3AR1, DCN, BTG1, FGF9, FLT1, RGCC, KLF5, MMP14, BMP4, ZFP36L1, TJP1, FMN1, SLC12A6, THBS1, SPINT1, SMAD3, NOX5, ANPEP, NR2F2, ITGAX, IRX3, MMP2, GPR56, SERPINF1, CCL2, PLXDC1, JUP, WNK4, CCDC103, HOXB7, SOX9, SPHK1, CCDC40, RNF213, NTN…	any
GO:0023052	signaling	GO:BP	8.24e-09	6772	500	ENSG00000107554, ENSG00000108018, ENSG00000138166, ENSG00000151892, ENSG00000151651, ENSG00000165757, ENSG00000099250, ENSG00000177283, ENSG00000165731, ENSG00000128805, ENSG00000107984, ENSG00000150347, ENSG00000122877, ENSG00000107731, ENSG00000122861, ENSG00000108175, ENSG00000187240, ENSG00000050165, ENSG00000080854, ENSG00000130592, ENSG00000064201, ENSG00000176971, ENSG00000185201, ENSG0000…	DNMBP, SORCS1, DUSP5, GFRA1, ADAM8, KIAA1462, NRP1, FZD8, RET, ARHGAP22, DKK1, ARID5B, EGR2, UNC5B, PLAU, ZMIZ1, DYNC2H1, DKK3, IGSF9B, LSP1, TSPAN32, FIBIN, IFITM2, IFITM1, IFITM3, DEPDC7, CD44, LRRC4C, SIGIRR, MDK, LRP4, AC104389.28, SYT7, LGALS12, FERMT3, NRXN2, LTBP3, FAM89B, CNIH2, RIN1, TPP1, DCHS1, CAPN5, PIDD, KLRC2, KLRC1, SH2B3, TAS2R30, OAS1, OAS2, NOS1, OASL, GPRC5A, RIMBP2, CACNA2D4,…	upregulated
GO:0048514	blood vessel morphogenesis	GO:BP	1.07e-08	697	88	ENSG00000151651, ENSG00000165757, ENSG00000099250, ENSG00000177283, ENSG00000128805, ENSG00000107731, ENSG00000108175, ENSG00000154133, ENSG00000110492, ENSG00000079337, ENSG00000161791, ENSG00000139567, ENSG00000149948, ENSG00000171860, ENSG00000011465, ENSG00000133639, ENSG00000102760, ENSG00000157227, ENSG00000185650, ENSG00000140199, ENSG00000255346, ENSG00000166825, ENSG00000140678, ENSG0000…	ADAM8, KIAA1462, NRP1, FZD8, ARHGAP22, UNC5B, ZMIZ1, ROBO4, MDK, RAPGEF3, FMNL3, ACVRL1, HMGA2, C3AR1, DCN, BTG1, RGCC, MMP14, ZFP36L1, SLC12A6, NOX5, ANPEP, ITGAX, MMP2, GPR56, SERPINF1, CCL2, JUP, SPHK1, RNF213, JUNB, MIR27A, MIR23A, TGFB1, CEACAM1, LRG1, C3, VAV3, SHC1, PRRX1, GLUL, PTGS2, CHI3L1, COL8A2, TIE1, CYR61, ISM1, RIN2, FAP, CALCRL, FN1, SCG2, EMILIN1, TGFA, HK2, PPARG, MYLK, APOD, P…	upregulated
GO:0045785	positive regulation of cell adhesion	GO:BP	1.24e-08	422	63	ENSG00000151651, ENSG00000099250, ENSG00000165731, ENSG00000108175, ENSG00000026508, ENSG00000110492, ENSG00000135426, ENSG00000102524, ENSG00000248905, ENSG00000166949, ENSG00000102879, ENSG00000103490, ENSG00000205336, ENSG00000168961, ENSG00000108691, ENSG00000173801, ENSG00000105329, ENSG00000162692, ENSG00000134215, ENSG00000184371, ENSG00000134242, ENSG00000075945, ENSG00000120337, ENSG0000…	ADAM8, NRP1, RET, ZMIZ1, CD44, MDK, TESPA1, TNFSF13B, FMN1, SMAD3, CORO1A, PYCARD, GPR56, LGALS9, CCL2, JUP, TGFB1, VCAM1, VAV3, CSF1, PTPN22, KIFAP3, TNFSF18, TNFSF4, PTPRC, NID1, PTPRU, IL23R, BCL10, CYR61, RIN2, FOXA2, TGM2, ADA, PREX1, MAP4K4, DPP4, ITGA4, FN1, EMILIN1, ABI3BP, NFKBIZ, BCL6, PPP3CA, FGB, FGG, IBSP, MEGF10, CD74, IL7R, ITGA2, MYB, HLA-DMB, HLA-DPA1, VEGFA, EPHB6, AGR2, IL6, AN…	upregulated
GO:0050896	response to stimulus	GO:BP	1.3e-08	9455	656	ENSG00000107554, ENSG00000099194, ENSG00000065621, ENSG00000108018, ENSG00000138166, ENSG00000151892, ENSG00000187908, ENSG00000151651, ENSG00000107611, ENSG00000165757, ENSG00000099250, ENSG00000177283, ENSG00000165731, ENSG00000128805, ENSG00000107984, ENSG00000165471, ENSG00000150347, ENSG00000122877, ENSG00000138347, ENSG00000107731, ENSG00000122861, ENSG00000108175, ENSG00000184719, ENSG0000…	DNMBP, SCD, GSTO2, SORCS1, DUSP5, GFRA1, DMBT1, ADAM8, CUBN, KIAA1462, NRP1, FZD8, RET, ARHGAP22, DKK1, MBL2, ARID5B, EGR2, MYPN, UNC5B, PLAU, ZMIZ1, RNLS, MMP13, DYNC2H1, AMPD3, DKK3, GRAMD1B, ROBO4, IGSF9B, LSP1, SVIP, TSPAN32, FIBIN, IFITM2, IFITM1, IFITM3, DEPDC7, CD44, SIGIRR, SYT13, MDK, LRP4, HBE1, AC104389.28, HBG2, SERPING1, SYT7, ROM1, LGALS12, FERMT3, NRXN2, BATF2, LTBP3, FAM89B, FOSL1…	upregulated
GO:0048468	cell development	GO:BP	1.4e-08	2215	204	ENSG00000151892, ENSG00000148803, ENSG00000099250, ENSG00000165731, ENSG00000107984, ENSG00000165471, ENSG00000150347, ENSG00000122877, ENSG00000138347, ENSG00000107731, ENSG00000154133, ENSG00000151702, ENSG00000148948, ENSG00000110492, ENSG00000134569, ENSG00000124920, ENSG00000149781, ENSG00000111252, ENSG00000089250, ENSG00000123095, ENSG00000188906, ENSG00000079337, ENSG00000139626, ENSG0000…	GFRA1, FUOM, NRP1, RET, DKK1, MBL2, ARID5B, EGR2, MYPN, UNC5B, ROBO4, FLI1, LRRC4C, MDK, LRP4, MYRF, FERMT3, SH2B3, NOS1, BHLHE41, LRRK2, RAPGEF3, ITGB7, STAC3, KIF5A, AVIL, PPFIA2, POSTN, EDNRB, SLITRK1, SLITRK6, REC8, RPS6KA5, GPR68, SPINT1, SEMA6D, GLDN, SMAD3, PAQR5, CHRNA3, SEMA4B, STX1B, IRX3, GPR56, HSF4, HYDIN, TUBB3, TUBB3, SCARF1, SERPINF1, RNF112, OMG, EVI2B, TRPV1, GRB7, NR1D1, GFAP, …	upregulated
GO:0045785	positive regulation of cell adhesion	GO:BP	1.55e-08	422	98	ENSG00000151651, ENSG00000148484, ENSG00000107968, ENSG00000099250, ENSG00000165731, ENSG00000107738, ENSG00000108175, ENSG00000150782, ENSG00000026508, ENSG00000110492, ENSG00000135426, ENSG00000102524, ENSG00000104067, ENSG00000248905, ENSG00000140416, ENSG00000166949, ENSG00000102879, ENSG00000103490, ENSG00000205336, ENSG00000168961, ENSG00000108691, ENSG00000173801, ENSG00000092929, ENSG0000…	ADAM8, RSU1, MAP3K8, NRP1, RET, C10orf54, ZMIZ1, IL18, CD44, MDK, TESPA1, TNFSF13B, TJP1, FMN1, TPM1, SMAD3, CORO1A, PYCARD, GPR56, LGALS9, CCL2, JUP, UNC13D, TGFB1, FSTL3, VCAM1, VAV3, CSF1, PTPN22, PDPN, KIFAP3, TNFSF18, TNFSF4, PTPRC, TGFB2, DISC1, NID1, KIF26B, PTPRU, COL16A1, IL23R, BCL10, CYR61, RIN2, FOXA2, TGM2, ADA, PREX1, MAP4K4, EPB41L5, GLI2, LIMS2, DPP4, ITGA4, FN1, EMILIN1, DYSF, AB…	any
GO:0022008	neurogenesis	GO:BP	1.55e-08	1679	165	ENSG00000151892, ENSG00000148803, ENSG00000099250, ENSG00000177283, ENSG00000165731, ENSG00000107984, ENSG00000122877, ENSG00000138347, ENSG00000107731, ENSG00000187240, ENSG00000154133, ENSG00000148948, ENSG00000110492, ENSG00000134569, ENSG00000124920, ENSG00000149489, ENSG00000166341, ENSG00000089250, ENSG00000123095, ENSG00000188906, ENSG00000166886, ENSG00000155980, ENSG00000135407, ENSG0000…	GFRA1, FUOM, NRP1, FZD8, RET, DKK1, EGR2, MYPN, UNC5B, DYNC2H1, ROBO4, LRRC4C, MDK, LRP4, MYRF, ROM1, DCHS1, NOS1, BHLHE41, LRRK2, NAB2, KIF5A, AVIL, PPFIA2, POSTN, EDNRB, SLITRK1, SLITRK6, MMP14, RPS6KA5, SPINT1, SEMA6D, GLDN, DYX1C1, CHRNA3, SEMA4B, STX1B, IRX3, GPR56, TUBB3, TUBB3, SCARF1, SERPINF1, RNF112, OMG, CCL2, GRB7, NR1D1, GFAP, MMD, SOX9, FSCN2, HES7, APCDD1, IER2, TGFB1, SEMA6B, C3, …	upregulated
GO:0009605	response to external stimulus	GO:BP	1.63e-08	2923	253	ENSG00000151892, ENSG00000187908, ENSG00000151651, ENSG00000107611, ENSG00000099250, ENSG00000165731, ENSG00000165471, ENSG00000122877, ENSG00000138347, ENSG00000107731, ENSG00000122861, ENSG00000154133, ENSG00000064201, ENSG00000185201, ENSG00000185885, ENSG00000142089, ENSG00000026508, ENSG00000185187, ENSG00000110492, ENSG00000149131, ENSG00000110076, ENSG00000168062, ENSG00000175592, ENSG0000…	GFRA1, DMBT1, ADAM8, CUBN, NRP1, RET, MBL2, EGR2, MYPN, UNC5B, PLAU, ROBO4, TSPAN32, IFITM2, IFITM1, IFITM3, CD44, SIGIRR, MDK, SERPING1, NRXN2, BATF2, FOSL1, KLRC2, SH2B3, OAS1, OAS2, NOS1, OASL, CACNA2D4, LRRK2, KIF5A, HMGA2, C1S, TSPAN8, C1RL, C3AR1, ATP2B1, KLRG1, DCN, A2M, POSTN, EDNRB, SLITRK6, GPR18, MMP14, IRF9, LGALS3, FOS, RPS6KA5, IFI27, SEMA6D, FGF7, DAPK2, SMAD3, ISG20, SEMA4B, CORO1…	upregulated
GO:0048812	neuron projection morphogenesis	GO:BP	1.68e-08	673	138	ENSG00000151892, ENSG00000066468, ENSG00000151640, ENSG00000170759, ENSG00000099250, ENSG00000165731, ENSG00000122877, ENSG00000138347, ENSG00000107731, ENSG00000154133, ENSG00000149571, ENSG00000176697, ENSG00000007372, ENSG00000148948, ENSG00000134569, ENSG00000151490, ENSG00000188906, ENSG00000155980, ENSG00000155974, ENSG00000139220, ENSG00000074527, ENSG00000041515, ENSG00000132932, ENSG0000…	GFRA1, FGFR2, DPYSL4, KIF5B, NRP1, RET, EGR2, MYPN, UNC5B, ROBO4, KIRREL3, BDNF, PAX6, LRRC4C, LRP4, PTPRO, LRRK2, KIF5A, GRIP1, PPFIA2, NTN4, MYO16, ATP8A2, DCLK1, POSTN, SLITRK1, SLITRK6, FARP1, SPTB, RPS6KA5, SEMA6D, NPTN, CHRNA3, SEMA4B, DOK4, TUBB3, TUBB3, ULK2, OMG, GRB7, MYH10, NTN1, CDH2, EPB41L3, PTPRM, APOE, SEMA6B, LRRC4B, CACNG7, NTNG1, CELSR2, AMIGO1, NGF, DRAXIN, CHRNB2, SHC1, EFNA1…	any
GO:0006811	ion transport	GO:BP	1.74e-08	1723	289	ENSG00000203805, ENSG00000170759, ENSG00000204176, ENSG00000156026, ENSG00000152779, ENSG00000176273, ENSG00000149403, ENSG00000154127, ENSG00000134955, ENSG00000171714, ENSG00000176697, ENSG00000019505, ENSG00000011347, ENSG00000124942, ENSG00000174871, ENSG00000110195, ENSG00000166394, ENSG00000151572, ENSG00000122986, ENSG00000089250, ENSG00000151062, ENSG00000134548, ENSG00000174236, ENSG0000…	PPAPDC1A, KIF5B, SYT15, MCU, SLC16A12, SLC35G1, GRIK4, UBASH3B, SLC37A2, ANO5, BDNF, SYT13, SYT7, AHNAK, CNIH2, FOLR1, CYB5R2, ANO4, HVCN1, NOS1, CACNA2D4, C12orf39, REP15, PKP2, CNTN1, SLC38A1, SCN8A, STAC3, SLC26A10, ANO2, SCNN1A, BEST3, PPFIA2, ATP2B1, GAS6, ATP8A2, HTR2A, NDFIP2, CLDN10, SLC7A7, SLC7A8, SLC25A21, LGALS3, BDKRB2, ATP10A, GABRA5, GABRB3, SLC12A6, THBS1, PLCB2, SLC30A4, TNFAIP8L…	any
GO:0010647	positive regulation of cell communication	GO:BP	1.85e-08	1900	313	ENSG00000138166, ENSG00000066468, ENSG00000019995, ENSG00000151651, ENSG00000150054, ENSG00000095739, ENSG00000165757, ENSG00000107968, ENSG00000170759, ENSG00000099250, ENSG00000177283, ENSG00000165731, ENSG00000107984, ENSG00000107731, ENSG00000156026, ENSG00000108175, ENSG00000108219, ENSG00000148677, ENSG00000155629, ENSG00000187240, ENSG00000150782, ENSG00000137642, ENSG00000080854, ENSG0000…	DUSP5, FGFR2, ZRANB1, ADAM8, MPP7, BAMBI, KIAA1462, MAP3K8, KIF5B, NRP1, FZD8, RET, DKK1, UNC5B, MCU, ZMIZ1, TSPAN14, ANKRD1, PIK3AP1, DYNC2H1, IL18, SORL1, IGSF9B, LGR4, BDNF, CDKN1C, CD44, PRR5L, OR51E2, TRIM6, SYT7, PPP2R5B, SH2B3, HRK, NOS1, LRRK2, ACVRL1, TESPA1, ERBB3, GRIP1, DUSP6, DCN, GAS6, FGF9, TNFRSF19, FLT1, HTR2A, LPAR6, SCEL, NDFIP2, GPR18, AJUBA, RIPK3, BMP4, GPR65, GPR68, LGMN, T…	any
GO:2000026	regulation of multicellular organismal development	GO:BP	2.06e-08	2210	203	ENSG00000151651, ENSG00000148803, ENSG00000165757, ENSG00000099250, ENSG00000165731, ENSG00000107984, ENSG00000108175, ENSG00000148948, ENSG00000110492, ENSG00000134569, ENSG00000124920, ENSG00000133321, ENSG00000168056, ENSG00000111335, ENSG00000089250, ENSG00000123095, ENSG00000188906, ENSG00000079337, ENSG00000139567, ENSG00000135426, ENSG00000135407, ENSG00000149948, ENSG00000139220, ENSG0000…	ADAM8, FUOM, KIAA1462, NRP1, RET, DKK1, ZMIZ1, LRRC4C, MDK, LRP4, MYRF, RARRES3, LTBP3, OAS2, NOS1, BHLHE41, LRRK2, RAPGEF3, ACVRL1, TESPA1, AVIL, HMGA2, PPFIA2, C3AR1, DUSP6, ATP2B1, DCN, BTG1, RGCC, EDNRB, SLITRK1, SLITRK6, GPC6, MMP14, LGALS3, ZFP36L1, FOS, GPR68, SPINT1, SEMA6D, FGF7, SMAD3, CHRNA3, SEMA4B, STX1B, ITGAX, IRX3, GPR56, PARD6A, SCARF1, SERPINF1, RNF112, LGALS9, OMG, EVI2B, NR1D1…	upregulated
GO:0001501	skeletal system development	GO:BP	2.09e-08	535	73	ENSG00000165471, ENSG00000150347, ENSG00000137745, ENSG00000151702, ENSG00000026508, ENSG00000110492, ENSG00000168056, ENSG00000166341, ENSG00000111252, ENSG00000139567, ENSG00000166886, ENSG00000149948, ENSG00000157227, ENSG00000119714, ENSG00000248905, ENSG00000166949, ENSG00000087245, ENSG00000183018, ENSG00000182742, ENSG00000260027, ENSG00000125398, ENSG00000179111, ENSG00000197046, ENSG0000…	MBL2, ARID5B, MMP13, FLI1, CD44, MDK, LTBP3, DCHS1, SH2B3, ACVRL1, NAB2, HMGA2, MMP14, GPR68, FMN1, SMAD3, MMP2, SPNS2, HOXB4, HOXB7, SOX9, HES7, SIGLEC15, ACP5, TGFB1, VWA1, THBS3, BGLAP, BCAN, PBX1, PRRX1, PTPRC, CHI3L1, WNT9A, CYR61, GDF5, BMP2, COL6A1, COL6A2, FRZB, NAB1, SATB2, COL6A3, IFT172, TP63, RARB, HYAL3, RP5-966M1.6, HHIP, SMAD1, PDGFRA, BMP3, BMPR1B, TGFBI, FST, HAPLN1, COL10A1, GJA…	upregulated
GO:0006952	defense response	GO:BP	2.38e-08	1783	172	ENSG00000187908, ENSG00000151651, ENSG00000165471, ENSG00000130592, ENSG00000064201, ENSG00000185201, ENSG00000185885, ENSG00000142089, ENSG00000026508, ENSG00000185187, ENSG00000110492, ENSG00000149131, ENSG00000168062, ENSG00000175592, ENSG00000205810, ENSG00000205809, ENSG00000089127, ENSG00000111335, ENSG00000135114, ENSG00000188906, ENSG00000182326, ENSG00000139178, ENSG00000171860, ENSG0000…	DMBT1, ADAM8, MBL2, LSP1, TSPAN32, IFITM2, IFITM1, IFITM3, CD44, SIGIRR, MDK, SERPING1, BATF2, FOSL1, KLRC3, KLRC2, OAS1, OAS2, OASL, LRRK2, C1S, C1RL, C3AR1, KLRG1, A2M, EDNRB, IRF9, LGALS3, FOS, RPS6KA5, GPR68, IFI27, SERPINA1, BDKRB2, SMAD3, NOX5, ISG20, LAT, CORO1A, MMP25, PYCARD, ITGAX, ADORA2B, SERPINF1, LGALS9, CCL2, TRPV1, NR1D1, DHX58, STAT5A, SPHK1, CD68, RNF125, SIGLEC15, COLEC12, PMAI…	upregulated
GO:0023056	positive regulation of signaling	GO:BP	2.91e-08	1907	313	ENSG00000138166, ENSG00000066468, ENSG00000019995, ENSG00000151651, ENSG00000150054, ENSG00000095739, ENSG00000165757, ENSG00000107968, ENSG00000170759, ENSG00000099250, ENSG00000177283, ENSG00000165731, ENSG00000107984, ENSG00000107731, ENSG00000156026, ENSG00000108175, ENSG00000108219, ENSG00000148677, ENSG00000155629, ENSG00000187240, ENSG00000150782, ENSG00000137642, ENSG00000080854, ENSG0000…	DUSP5, FGFR2, ZRANB1, ADAM8, MPP7, BAMBI, KIAA1462, MAP3K8, KIF5B, NRP1, FZD8, RET, DKK1, UNC5B, MCU, ZMIZ1, TSPAN14, ANKRD1, PIK3AP1, DYNC2H1, IL18, SORL1, IGSF9B, LGR4, BDNF, CDKN1C, CD44, PRR5L, OR51E2, TRIM6, SYT7, PPP2R5B, SH2B3, HRK, NOS1, LRRK2, ACVRL1, TESPA1, ERBB3, GRIP1, DUSP6, DCN, GAS6, FGF9, TNFRSF19, FLT1, HTR2A, LPAR6, SCEL, NDFIP2, GPR18, AJUBA, RIPK3, BMP4, GPR65, GPR68, LGMN, T…	any
GO:0009653	anatomical structure morphogenesis	GO:BP	3.08e-08	2820	242	ENSG00000099204, ENSG00000107518, ENSG00000066468, ENSG00000019995, ENSG00000148848, ENSG00000151640, ENSG00000078114, ENSG00000095739, ENSG00000170759, ENSG00000072422, ENSG00000156026, ENSG00000122367, ENSG00000107796, ENSG00000148677, ENSG00000137710, ENSG00000109846, ENSG00000150782, ENSG00000076706, ENSG00000149571, ENSG00000110693, ENSG00000109854, ENSG00000205213, ENSG00000176697, ENSG0000…	ABLIM1, ATRNL1, FGFR2, ZRANB1, ADAM12, DPYSL4, NEBL, BAMBI, KIF5B, RHOBTB1, MCU, LDB3, ACTA2, ANKRD1, RDX, CRYAB, IL18, MCAM, KIRREL3, SOX6, HTATIP2, LGR4, BDNF, PAX6, EHD1, CST6, LRP5, FOLR1, MTMR2, TXNRD1, STX2, MGP, PTPRO, FGD4, PKP2, HOXC13, GRIP1, PTPRQ, NTN4, MYO16, FGF9, ATP8A2, WASF3, CDX2, FLT1, FRY, DCLK1, KLF5, FARP1, AJUBA, CFL2, FERMT2, BMP4, SPTB, MPP5, ACTN1, FOXN3, ATP10A, TJP1, A…	downregulated
GO:0051272	positive regulation of cellular component movement	GO:BP	3.42e-08	602	126	ENSG00000151651, ENSG00000165757, ENSG00000099250, ENSG00000165731, ENSG00000107738, ENSG00000156026, ENSG00000122861, ENSG00000137710, ENSG00000076706, ENSG00000133818, ENSG00000110492, ENSG00000149781, ENSG00000176973, ENSG00000171860, ENSG00000183087, ENSG00000102678, ENSG00000102755, ENSG00000133110, ENSG00000157227, ENSG00000125378, ENSG00000131981, ENSG00000100600, ENSG00000104067, ENSG0000…	ADAM8, KIAA1462, NRP1, RET, C10orf54, MCU, PLAU, RDX, MCAM, RRAS2, MDK, FERMT3, FAM89B, C3AR1, GAS6, FGF9, FLT1, POSTN, MMP14, BMP4, LGALS3, LGMN, TJP1, THBS1, SEMA6D, FGF7, DAPK2, SMAD3, SEMA4B, IGF1R, CORO1A, PYCARD, ITGAX, LGALS9, GRB7, STAT5A, SMURF2, SOX9, SPHK1, NTN1, CCBE1, SERPINB3, MIR27A, MIR23A, TGFB1, SEMA6B, CSF1, PDPN, TRIM46, NOS1AP, TNFSF18, PTGS2, PTPRC, TGFB2, AGT, AKT3, CYR61, …	any
GO:0046903	secretion	GO:BP	3.42e-08	1709	166	ENSG00000151651, ENSG00000122861, ENSG00000133805, ENSG00000198168, ENSG00000026508, ENSG00000019505, ENSG00000110492, ENSG00000149131, ENSG00000011347, ENSG00000149781, ENSG00000110076, ENSG00000122986, ENSG00000111335, ENSG00000118308, ENSG00000188906, ENSG00000079337, ENSG00000111052, ENSG00000139220, ENSG00000171860, ENSG00000175899, ENSG00000102524, ENSG00000133110, ENSG00000102760, ENSG0000…	ADAM8, PLAU, AMPD3, SVIP, CD44, SYT13, MDK, SERPING1, SYT7, FERMT3, NRXN2, HVCN1, OAS2, LRMP, LRRK2, RAPGEF3, LIN7A, PPFIA2, C3AR1, A2M, TNFSF13B, POSTN, RGCC, EDNRB, LGALS3, LTBP2, GPR68, SERPINA1, BDKRB2, FGF7, NOX5, ISLR, CHRNA3, NMB, ANPEP, MCTP2, SSTR5, RAB26, LAT, PRRT2, CORO1A, MMP25, STX1B, PYCARD, ITGAX, PARD6A, ADORA2B, LGALS9, ALDOC, PROCA1, TRPV1, NR1D1, JUP, STAT5A, ATP6V0A1, WNK4, A…	upregulated
GO:0048646	anatomical structure formation involved in morphogenesis	GO:BP	3.49e-08	1206	128	ENSG00000138166, ENSG00000151651, ENSG00000165757, ENSG00000099250, ENSG00000177283, ENSG00000165731, ENSG00000128805, ENSG00000107984, ENSG00000122877, ENSG00000138347, ENSG00000107731, ENSG00000154133, ENSG00000110492, ENSG00000166341, ENSG00000089250, ENSG00000079337, ENSG00000161791, ENSG00000139567, ENSG00000135424, ENSG00000149948, ENSG00000171860, ENSG00000011465, ENSG00000133639, ENSG0000…	DUSP5, ADAM8, KIAA1462, NRP1, FZD8, RET, ARHGAP22, DKK1, EGR2, MYPN, UNC5B, ROBO4, MDK, DCHS1, NOS1, RAPGEF3, FMNL3, ACVRL1, ITGA7, HMGA2, C3AR1, DCN, BTG1, TNFSF13B, RGCC, MMP14, FMN1, SLC12A6, SPINT1, WDR72, SMAD3, NOX5, ANPEP, ITGAX, IRX3, MMP2, GPR56, SERPINF1, CCL2, JUP, FAM20A, SOX9, SPHK1, RNF213, HES7, JUNB, MIR27A, MIR23A, GDF15, TGFB1, CEACAM1, BCL3, LRG1, FLT3LG, C3, VAV3, SHC1, THBS3,…	upregulated
GO:0045597	positive regulation of cell differentiation	GO:BP	3.63e-08	1022	189	ENSG00000151651, ENSG00000095739, ENSG00000099250, ENSG00000165731, ENSG00000107984, ENSG00000107738, ENSG00000108175, ENSG00000148677, ENSG00000150782, ENSG00000110693, ENSG00000176697, ENSG00000185885, ENSG00000007372, ENSG00000110492, ENSG00000133321, ENSG00000110047, ENSG00000068971, ENSG00000168056, ENSG00000162337, ENSG00000018236, ENSG00000139567, ENSG00000135426, ENSG00000135407, ENSG0000…	ADAM8, BAMBI, NRP1, RET, DKK1, C10orf54, ZMIZ1, ANKRD1, IL18, SOX6, BDNF, IFITM1, PAX6, MDK, RARRES3, EHD1, PPP2R5B, LTBP3, LRP5, CNTN1, ACVRL1, TESPA1, AVIL, GRIP1, BTG1, GAS6, ATP8A2, CDX2, RGCC, HTR2A, KLF5, SLITRK1, MMP14, BMP4, ZFP36L1, FOS, GPR68, SPINT1, SMAD3, NPTN, SH3GL3, GPRC5B, IRX3, HSF4, SCARF1, SERPINF1, RNF112, LGALS9, EVI2B, GFAP, HOXB4, MMD, AXIN2, SOX9, UNC13D, NTN1, CDH2, SERP…	any
GO:0072359	circulatory system development	GO:BP	3.66e-08	1194	127	ENSG00000151651, ENSG00000165757, ENSG00000099250, ENSG00000177283, ENSG00000128805, ENSG00000107984, ENSG00000107731, ENSG00000108175, ENSG00000187240, ENSG00000154133, ENSG00000110492, ENSG00000149489, ENSG00000175592, ENSG00000166341, ENSG00000079337, ENSG00000161791, ENSG00000139567, ENSG00000149948, ENSG00000171860, ENSG00000139318, ENSG00000011465, ENSG00000133639, ENSG00000102760, ENSG0000…	ADAM8, KIAA1462, NRP1, FZD8, ARHGAP22, DKK1, UNC5B, ZMIZ1, DYNC2H1, ROBO4, MDK, ROM1, FOSL1, DCHS1, RAPGEF3, FMNL3, ACVRL1, HMGA2, C3AR1, DUSP6, DCN, BTG1, RGCC, CRIP1, MMP14, ZFP36L1, SLC12A6, SPINT1, DYX1C1, SMAD3, NOX5, ANPEP, ITGAX, MMP2, GPR56, SERPINF1, ADAP2, CCL2, JUP, CCDC103, DLX3, SOX9, SPHK1, CCDC40, GAA, RNF213, JUNB, MIR27A, MIR23A, TGFB1, CEACAM1, LRG1, C3, VAV3, TNFRSF1B, SHC1, RG…	upregulated
GO:0042127	regulation of cell population proliferation	GO:BP	3.75e-08	1749	291	ENSG00000198873, ENSG00000066468, ENSG00000095739, ENSG00000165757, ENSG00000099250, ENSG00000107738, ENSG00000122861, ENSG00000108175, ENSG00000165887, ENSG00000150782, ENSG00000064201, ENSG00000176697, ENSG00000129757, ENSG00000185885, ENSG00000007372, ENSG00000175274, ENSG00000110492, ENSG00000133321, ENSG00000168056, ENSG00000175592, ENSG00000162337, ENSG00000074590, ENSG00000111252, ENSG0000…	GRK5, FGFR2, BAMBI, KIAA1462, NRP1, C10orf54, PLAU, ZMIZ1, ANKRD2, IL18, TSPAN32, BDNF, CDKN1C, IFITM1, PAX6, TP53I11, MDK, RARRES3, LTBP3, FOSL1, LRP5, NUAK1, SH2B3, LRRK2, C1QL4, ACVRL1, IGFBP6, ERBB3, HMGA2, PAWR, BTG1, TNFSF13B, MYO16, GAS6, FGF9, ATP8A2, CDX2, FLT1, RGCC, HTR2A, KLF5, EDNRB, CRIP2, NDRG2, DHRS2, TGM1, RIPK3, BMP4, LGALS3, ZFP36L1, LGMN, CLMN, THBS1, SPINT1, SHC4, FGF7, TPM1,…	any
GO:0051216	cartilage development	GO:BP	3.82e-08	216	61	ENSG00000165471, ENSG00000137745, ENSG00000110693, ENSG00000026508, ENSG00000110492, ENSG00000168056, ENSG00000111341, ENSG00000139567, ENSG00000149948, ENSG00000102678, ENSG00000125378, ENSG00000166949, ENSG00000157766, ENSG00000183688, ENSG00000168646, ENSG00000125398, ENSG00000105329, ENSG00000060718, ENSG00000179403, ENSG00000169231, ENSG00000116132, ENSG00000133048, ENSG00000143816, ENSG0000…	MBL2, MMP13, SOX6, CD44, MDK, LTBP3, MGP, ACVRL1, HMGA2, FGF9, BMP4, SMAD3, ACAN, FAM101B, AXIN2, SOX9, TGFB1, COL11A1, VWA1, THBS3, PRRX1, CHI3L1, WNT9A, CYR61, GDF5, BMP2, COL6A1, COL6A2, GLI2, FRZB, SATB2, MATN3, COL6A3, RARB, PTH1R, HYAL3, RP5-966M1.6, WNT5A, FGF2, NKX3-2, SMAD1, FGFR3, CYTL1, BMP3, BMPR1B, TGFBI, MSX2, GHR, EDN1, CTGF, GPLD1, BMP5, ITGB8, NOV, CSGALNACT1, STC1, SULF1, COL27A…	any
GO:0007154	cell communication	GO:BP	4.03e-08	6798	498	ENSG00000107554, ENSG00000108018, ENSG00000138166, ENSG00000151892, ENSG00000151651, ENSG00000165757, ENSG00000099250, ENSG00000177283, ENSG00000165731, ENSG00000128805, ENSG00000107984, ENSG00000150347, ENSG00000122877, ENSG00000107731, ENSG00000122861, ENSG00000108175, ENSG00000187240, ENSG00000050165, ENSG00000080854, ENSG00000130592, ENSG00000064201, ENSG00000176971, ENSG00000185201, ENSG0000…	DNMBP, SORCS1, DUSP5, GFRA1, ADAM8, KIAA1462, NRP1, FZD8, RET, ARHGAP22, DKK1, ARID5B, EGR2, UNC5B, PLAU, ZMIZ1, DYNC2H1, DKK3, IGSF9B, LSP1, TSPAN32, FIBIN, IFITM2, IFITM1, IFITM3, DEPDC7, CD44, LRRC4C, SIGIRR, MDK, LRP4, AC104389.28, SYT7, LGALS12, FERMT3, NRXN2, LTBP3, FAM89B, FOSL1, CNIH2, RIN1, TPP1, DCHS1, CAPN5, PIDD, KLRC2, KLRC1, SH2B3, TAS2R30, OAS1, OAS2, NOS1, OASL, GPRC5A, RIMBP2, RA…	upregulated
GO:0065009	regulation of molecular function	GO:BP	4.42e-08	3061	464	ENSG00000138166, ENSG00000066468, ENSG00000170430, ENSG00000151651, ENSG00000148484, ENSG00000095739, ENSG00000107968, ENSG00000170759, ENSG00000099250, ENSG00000177283, ENSG00000165731, ENSG00000128805, ENSG00000107984, ENSG00000150347, ENSG00000107738, ENSG00000122861, ENSG00000123243, ENSG00000108239, ENSG00000137710, ENSG00000170276, ENSG00000109846, ENSG00000150782, ENSG00000050165, ENSG0000…	DUSP5, FGFR2, MGMT, ADAM8, RSU1, BAMBI, MAP3K8, KIF5B, NRP1, FZD8, RET, ARHGAP22, DKK1, ARID5B, C10orf54, PLAU, ITIH5, TBC1D12, RDX, HSPB2, CRYAB, IL18, DKK3, SORL1, BLID, UBASH3B, DUSP8, LGR4, BDNF, CDKN1C, PAX6, CD44, SIGIRR, TRIM6, SERPING1, AHNAK, RARRES3, RASGRP2, PPP2R5B, FOSL1, CST6, CNIH2, RIN1, LRP5, PIDD, NUAK1, SH2B3, OAS1, OAS2, NOS1, OASL, DUSP16, GPRC5A, RIMBP2, PTPRO, FGD4, LRRK2, …	any
GO:0007156	homophilic cell adhesion via plasma membrane adhesion molecules	GO:BP	4.61e-08	167	35	ENSG00000182985, ENSG00000149571, ENSG00000118946, ENSG00000156642, ENSG00000069188, ENSG00000170558, ENSG00000046604, ENSG00000173482, ENSG00000073008, ENSG00000143126, ENSG00000181754, ENSG00000162614, ENSG00000144619, ENSG00000008300, ENSG00000185008, ENSG00000196159, ENSG00000197410, ENSG00000169851, ENSG00000204970, ENSG00000255408, ENSG00000204967, ENSG00000204965, ENSG00000204963, ENSG0000…	CADM1, KIRREL3, PCDH17, NPTN, SDK2, CDH2, DSG2, PTPRM, PVR, CELSR2, AMIGO1, NEXN, CNTN4, CELSR3, ROBO2, FAT4, DCHS2, PCDH7, PCDHA1, PCDHA3, PCDHA4, PCDHA5, PCDHA7, PCDHA8, PCDHA9, PCDHA10, PCDHA11, PCDHA12, PCDHA13, PCDHAC1, PCDHB3, EMB, SDK1, L1CAM, PCDH11X	downregulated
GO:0030335	positive regulation of cell migration	GO:BP	4.63e-08	560	119	ENSG00000151651, ENSG00000165757, ENSG00000099250, ENSG00000165731, ENSG00000107738, ENSG00000156026, ENSG00000122861, ENSG00000137710, ENSG00000076706, ENSG00000133818, ENSG00000110492, ENSG00000149781, ENSG00000176973, ENSG00000171860, ENSG00000183087, ENSG00000102678, ENSG00000102755, ENSG00000133110, ENSG00000157227, ENSG00000125378, ENSG00000131981, ENSG00000100600, ENSG00000104067, ENSG0000…	ADAM8, KIAA1462, NRP1, RET, C10orf54, MCU, PLAU, RDX, MCAM, RRAS2, MDK, FERMT3, FAM89B, C3AR1, GAS6, FGF9, FLT1, POSTN, MMP14, BMP4, LGALS3, LGMN, TJP1, THBS1, SEMA6D, FGF7, DAPK2, SMAD3, SEMA4B, IGF1R, CORO1A, PYCARD, ITGAX, LGALS9, GRB7, STAT5A, SMURF2, SOX9, SPHK1, CCBE1, SERPINB3, MIR27A, MIR23A, TGFB1, SEMA6B, CSF1, PDPN, TNFSF18, PTGS2, PTPRC, TGFB2, AGT, AKT3, CYR61, RIN2, PREX1, BMP2, RAC…	any
GO:0001525	angiogenesis	GO:BP	4.93e-08	601	78	ENSG00000151651, ENSG00000165757, ENSG00000099250, ENSG00000177283, ENSG00000128805, ENSG00000107731, ENSG00000154133, ENSG00000110492, ENSG00000079337, ENSG00000161791, ENSG00000139567, ENSG00000149948, ENSG00000171860, ENSG00000011465, ENSG00000133639, ENSG00000102760, ENSG00000157227, ENSG00000140199, ENSG00000255346, ENSG00000166825, ENSG00000140678, ENSG00000087245, ENSG00000205336, ENSG0000…	ADAM8, KIAA1462, NRP1, FZD8, ARHGAP22, UNC5B, ROBO4, MDK, RAPGEF3, FMNL3, ACVRL1, HMGA2, C3AR1, DCN, BTG1, RGCC, MMP14, SLC12A6, NOX5, ANPEP, ITGAX, MMP2, GPR56, SERPINF1, CCL2, JUP, SPHK1, RNF213, MIR27A, MIR23A, CEACAM1, LRG1, C3, VAV3, SHC1, GLUL, PTGS2, CHI3L1, COL8A2, TIE1, CYR61, ISM1, FAP, CALCRL, FN1, SCG2, EMILIN1, TGFA, HK2, PPARG, APOD, PLCD1, SMAD1, EDNRA, PDGFRA, IL8, EREG, TERT, TGF…	upregulated
GO:0040017	positive regulation of locomotion	GO:BP	5.82e-08	613	127	ENSG00000151651, ENSG00000165757, ENSG00000099250, ENSG00000165731, ENSG00000107738, ENSG00000156026, ENSG00000122861, ENSG00000137710, ENSG00000076706, ENSG00000133818, ENSG00000110492, ENSG00000149781, ENSG00000176973, ENSG00000171860, ENSG00000183087, ENSG00000102678, ENSG00000102755, ENSG00000133110, ENSG00000157227, ENSG00000125378, ENSG00000131981, ENSG00000100600, ENSG00000104067, ENSG0000…	ADAM8, KIAA1462, NRP1, RET, C10orf54, MCU, PLAU, RDX, MCAM, RRAS2, MDK, FERMT3, FAM89B, C3AR1, GAS6, FGF9, FLT1, POSTN, MMP14, BMP4, LGALS3, LGMN, TJP1, THBS1, SEMA6D, FGF7, DAPK2, SMAD3, IL16, SEMA4B, IGF1R, CORO1A, PYCARD, ITGAX, LGALS9, GRB7, STAT5A, SMURF2, SOX9, SPHK1, NTN1, CCBE1, SERPINB3, MIR27A, MIR23A, TGFB1, SEMA6B, CSF1, PDPN, TNFSF18, PTGS2, PTPRC, TGFB2, AGT, AKT3, CYR61, RIN2, PREX…	any
GO:0007166	cell surface receptor signaling pathway	GO:BP	6.24e-08	3197	269	ENSG00000151892, ENSG00000165757, ENSG00000099250, ENSG00000177283, ENSG00000165731, ENSG00000107984, ENSG00000150347, ENSG00000107731, ENSG00000108175, ENSG00000187240, ENSG00000050165, ENSG00000080854, ENSG00000064201, ENSG00000185201, ENSG00000185885, ENSG00000142089, ENSG00000026508, ENSG00000185187, ENSG00000110492, ENSG00000134569, ENSG00000149781, ENSG00000168056, ENSG00000176973, ENSG0000…	GFRA1, KIAA1462, NRP1, FZD8, RET, DKK1, ARID5B, UNC5B, ZMIZ1, DYNC2H1, DKK3, IGSF9B, TSPAN32, IFITM2, IFITM1, IFITM3, CD44, SIGIRR, MDK, LRP4, FERMT3, LTBP3, FAM89B, CNIH2, PIDD, KLRC1, SH2B3, OAS1, OAS2, OASL, GPRC5A, LRRK2, ACVRL1, IGFBP6, ITGB7, TESPA1, ITGA7, C3AR1, KLRG1, DCN, TNFSF13B, TNFRSF19, POSTN, EDNRB, GPC6, MMP14, EFS, IRF9, GNG2, LGALS3, LTBP2, FOS, RPS6KA5, IFI27, BDKRB2, SEMA6D, …	upregulated
GO:0050790	regulation of catalytic activity	GO:BP	6.58e-08	2385	375	ENSG00000138166, ENSG00000066468, ENSG00000170430, ENSG00000151651, ENSG00000148484, ENSG00000107968, ENSG00000099250, ENSG00000177283, ENSG00000165731, ENSG00000128805, ENSG00000107984, ENSG00000107738, ENSG00000123243, ENSG00000108239, ENSG00000137710, ENSG00000170276, ENSG00000109846, ENSG00000150782, ENSG00000137642, ENSG00000259571, ENSG00000154127, ENSG00000184545, ENSG00000205213, ENSG0000…	DUSP5, FGFR2, MGMT, ADAM8, RSU1, MAP3K8, NRP1, FZD8, RET, ARHGAP22, DKK1, C10orf54, ITIH5, TBC1D12, RDX, HSPB2, CRYAB, IL18, SORL1, BLID, UBASH3B, DUSP8, LGR4, BDNF, CDKN1C, CD44, SERPING1, RARRES3, RASGRP2, PPP2R5B, CST6, RIN1, LRP5, PIDD, NUAK1, SH2B3, OAS1, OAS2, NOS1, OASL, DUSP16, GPRC5A, RIMBP2, PTPRO, FGD4, LRRK2, RAPGEF3, ERBB3, NAB2, PPM1H, PLEKHG6, HMGA2, DUSP6, A2M, GAS6, LATS2, FLT1, …	any
GO:0051094	positive regulation of developmental process	GO:BP	7.89e-08	1457	146	ENSG00000151651, ENSG00000165757, ENSG00000099250, ENSG00000165731, ENSG00000107984, ENSG00000108175, ENSG00000185885, ENSG00000110492, ENSG00000124920, ENSG00000133321, ENSG00000168056, ENSG00000079337, ENSG00000139567, ENSG00000135426, ENSG00000135407, ENSG00000149948, ENSG00000171860, ENSG00000070961, ENSG00000011465, ENSG00000133639, ENSG00000102524, ENSG00000102760, ENSG00000178235, ENSG0000…	ADAM8, KIAA1462, NRP1, RET, DKK1, ZMIZ1, IFITM1, MDK, MYRF, RARRES3, LTBP3, RAPGEF3, ACVRL1, TESPA1, AVIL, HMGA2, C3AR1, ATP2B1, DCN, BTG1, TNFSF13B, RGCC, SLITRK1, SLITRK6, MMP14, ZFP36L1, FOS, GPR68, SPINT1, FGF7, SMAD3, ITGAX, IRX3, HSF4, SCARF1, SERPINF1, RNF112, LGALS9, EVI2B, KRT17, JUP, GFAP, HOXB4, HOXB7, MMD, SOX9, SPHK1, TNFSF13, SERPINB3, CBLN2, JUNB, MIR27A, MIR23A, GDF15, ZFP36, TGFB…	upregulated
GO:0016460	myosin II complex	GO:CC	7.95e-08	21	12	ENSG00000196465, ENSG00000133020, ENSG00000109061, ENSG00000125414, ENSG00000109063, ENSG00000133026, ENSG00000101608, ENSG00000118680, ENSG00000105357, ENSG00000101335, ENSG00000168530, ENSG00000064042	MYL6B, MYH8, MYH1, MYH2, MYH3, MYH10, MYL12A, MYL12B, MYH14, MYL9, MYL1, LIMCH1	downregulated
GO:0031674	I band	GO:CC	8.23e-08	144	45	ENSG00000078114, ENSG00000138347, ENSG00000122367, ENSG00000148677, ENSG00000165887, ENSG00000109846, ENSG00000089250, ENSG00000196876, ENSG00000185567, ENSG00000165410, ENSG00000073712, ENSG00000072110, ENSG00000159251, ENSG00000263155, ENSG00000173801, ENSG00000101605, ENSG00000101608, ENSG00000118680, ENSG00000134775, ENSG00000198929, ENSG00000159176, ENSG00000077522, ENSG00000184588, ENSG0000…	NEBL, MYPN, LDB3, ANKRD1, ANKRD2, CRYAB, NOS1, SCN8A, AHNAK2, CFL2, FERMT2, ACTN1, ACTC1, MYZAP, JUP, MYOM1, MYL12A, MYL12B, FHOD3, NOS1AP, CSRP1, ACTN2, PDE4B, NEXN, MYL9, JPH2, SCN1A, XIRP2, FKBP1B, TRIM54, SLC8A1, SCN5A, PPP3CA, SYNPO2, MYOZ2, PDLIM3, SORBS2, KCNN2, PDLIM7, FLNC, DNAJB6, FBXO32, PDLIM2, JPH1, PGM5	any
GO:0070887	cellular response to chemical stimulus	GO:BP	8.44e-08	3418	508	ENSG00000065621, ENSG00000066468, ENSG00000170430, ENSG00000151651, ENSG00000095739, ENSG00000165757, ENSG00000107968, ENSG00000170759, ENSG00000099250, ENSG00000165731, ENSG00000204176, ENSG00000198964, ENSG00000107984, ENSG00000150347, ENSG00000122877, ENSG00000156026, ENSG00000108175, ENSG00000148677, ENSG00000165887, ENSG00000137710, ENSG00000150782, ENSG00000050165, ENSG00000137642, ENSG0000…	GSTO2, FGFR2, MGMT, ADAM8, BAMBI, KIAA1462, MAP3K8, KIF5B, NRP1, RET, SYT15, SGMS1, DKK1, ARID5B, EGR2, MCU, ZMIZ1, ANKRD1, ANKRD2, RDX, IL18, DKK3, SORL1, GRAMD1B, SOX6, LGR4, BDNF, CDKN1C, IFITM2, IFITM1, PAX6, IFITM3, ABTB2, CD44, PRR5L, SIGIRR, SYT13, MDK, OR51E2, HBE1, TRIM6, HBG2, SYT7, RASGRP2, EHD1, PPP2R5B, LTBP3, FAM89B, TPP1, LRP5, FOLR1, DGAT2, TXNRD1, CRY1, HVCN1, SH2B3, OAS1, OAS2, …	any
GO:0044057	regulation of system process	GO:BP	8.72e-08	623	128	ENSG00000184719, ENSG00000080854, ENSG00000167332, ENSG00000124920, ENSG00000174871, ENSG00000087053, ENSG00000008405, ENSG00000089250, ENSG00000151490, ENSG00000151062, ENSG00000134548, ENSG00000057294, ENSG00000188906, ENSG00000070961, ENSG00000183087, ENSG00000132970, ENSG00000102468, ENSG00000136160, ENSG00000183092, ENSG00000136367, ENSG00000131979, ENSG00000168398, ENSG00000140416, ENSG0000…	RNLS, IGSF9B, OR51E2, MYRF, CNIH2, MTMR2, CRY1, NOS1, PTPRO, CACNA2D4, C12orf39, PKP2, LRRK2, ATP2B1, GAS6, WASF3, HTR2A, EDNRB, BEGAIN, ZFHX2, GCH1, BDKRB2, TPM1, SMAD3, CHRNA3, SHISA9, STX1B, ITGAX, GNAO1, ABAT, ADORA2B, KCNJ12, TRPV1, JUP, WNK4, ACE, CACNG4, SLC9A3R1, SPHK1, GAA, DSG2, CNN1, TSHZ3, KCNJ14, CACNG7, TNFRSF1B, NOS1AP, RGS4, ATP1B1, PTGS2, RGS2, TNNT2, TNNI1, ADORA1, KISS1, TGFB2,…	any
GO:0140352	export from cell	GO:BP	9.08e-08	1616	271	ENSG00000151651, ENSG00000099246, ENSG00000170759, ENSG00000204176, ENSG00000122862, ENSG00000156026, ENSG00000122861, ENSG00000108219, ENSG00000148677, ENSG00000176273, ENSG00000133805, ENSG00000182985, ENSG00000137642, ENSG00000198168, ENSG00000205213, ENSG00000176697, ENSG00000026508, ENSG00000019505, ENSG00000110492, ENSG00000167332, ENSG00000121236, ENSG00000149131, ENSG00000011347, ENSG0000…	ADAM8, RAB18, KIF5B, SYT15, SRGN, MCU, PLAU, TSPAN14, ANKRD1, SLC35G1, AMPD3, CADM1, SORL1, SVIP, LGR4, BDNF, CD44, SYT13, MDK, OR51E2, TRIM6, SERPING1, SYT7, FERMT3, NRXN2, LRP5, CRY1, HVCN1, STX2, LRMP, LRRK2, RAPGEF3, LIN7A, PPFIA2, C3AR1, ATP2B1, A2M, TNFSF13B, GAS6, POSTN, RGCC, HTR2A, STXBP6, LGALS3, SYT16, ACTN1, LTBP2, GPR68, SERPINA1, PCSK6, THBS1, FGF7, NOX5, ISLR, CHRNA3, NMB, ANPEP, M…	any
GO:0007399	nervous system development	GO:BP	9.24e-08	2432	216	ENSG00000151892, ENSG00000148803, ENSG00000099250, ENSG00000177283, ENSG00000165731, ENSG00000107984, ENSG00000122877, ENSG00000138347, ENSG00000107731, ENSG00000187240, ENSG00000154133, ENSG00000080854, ENSG00000148948, ENSG00000110492, ENSG00000134569, ENSG00000124920, ENSG00000149489, ENSG00000110076, ENSG00000166340, ENSG00000166341, ENSG00000089250, ENSG00000123095, ENSG00000188906, ENSG0000…	GFRA1, FUOM, NRP1, FZD8, RET, DKK1, EGR2, MYPN, UNC5B, DYNC2H1, ROBO4, IGSF9B, LRRC4C, MDK, LRP4, MYRF, ROM1, NRXN2, TPP1, DCHS1, NOS1, BHLHE41, LRRK2, NAB2, KIF5A, AVIL, PPFIA2, ATP2B1, POSTN, EDNRB, SLITRK1, SLITRK6, GPC6, MMP14, ZFP36L1, FOS, RPS6KA5, SPINT1, SEMA6D, GLDN, DYX1C1, CHRNA3, SEMA4B, STX1B, ITGAX, IRX3, GPR56, HYDIN, TUBB3, TUBB3, SCARF1, SERPINF1, RNF112, OMG, CCL2, GRB7, NR1D1, …	upregulated
GO:0008283	cell population proliferation	GO:BP	9.81e-08	2038	328	ENSG00000198873, ENSG00000066468, ENSG00000095739, ENSG00000165757, ENSG00000099250, ENSG00000107738, ENSG00000122861, ENSG00000108175, ENSG00000165887, ENSG00000150782, ENSG00000064201, ENSG00000205213, ENSG00000176697, ENSG00000129757, ENSG00000185885, ENSG00000007372, ENSG00000175274, ENSG00000110492, ENSG00000167332, ENSG00000133321, ENSG00000168056, ENSG00000175592, ENSG00000166341, ENSG0000…	GRK5, FGFR2, BAMBI, KIAA1462, NRP1, C10orf54, PLAU, ZMIZ1, ANKRD2, IL18, TSPAN32, LGR4, BDNF, CDKN1C, IFITM1, PAX6, TP53I11, MDK, OR51E2, RARRES3, LTBP3, FOSL1, DCHS1, LRP5, TXNRD1, NUAK1, SH2B3, LRRK2, C1QL4, ACVRL1, IGFBP6, ERBB3, HMGA2, PAWR, POC1B, BTG1, TNFSF13B, MYO16, GAS6, FGF9, ATP8A2, CDX2, FLT1, RGCC, HTR2A, KLF5, EDNRB, CRIP2, NDRG2, MMP14, DHRS2, TGM1, RIPK3, GNG2, BMP4, LGALS3, ZFP3…	any
GO:0048583	regulation of response to stimulus	GO:BP	1.14e-07	4421	348	ENSG00000107554, ENSG00000138166, ENSG00000151651, ENSG00000165757, ENSG00000099250, ENSG00000177283, ENSG00000165731, ENSG00000128805, ENSG00000107984, ENSG00000165471, ENSG00000107731, ENSG00000122861, ENSG00000108175, ENSG00000187240, ENSG00000050165, ENSG00000080854, ENSG00000198168, ENSG00000064201, ENSG00000185885, ENSG00000121690, ENSG00000026508, ENSG00000185187, ENSG00000019505, ENSG0000…	DNMBP, DUSP5, ADAM8, KIAA1462, NRP1, FZD8, RET, ARHGAP22, DKK1, MBL2, UNC5B, PLAU, ZMIZ1, DYNC2H1, DKK3, IGSF9B, SVIP, TSPAN32, IFITM1, DEPDC7, CD44, SIGIRR, SYT13, MDK, LRP4, SERPING1, SYT7, FAM89B, CNIH2, PIDD, KLRC1, SH2B3, NOS1, GPRC5A, LRRK2, C1QL4, ACVRL1, IGFBP6, ITGB7, TESPA1, PLEKHG6, HMGA2, C1S, TSPAN8, C1R, C1RL, C3AR1, DUSP6, ATP2B1, DCN, A2M, TNFSF13B, MCF2L, TNFRSF19, POSTN, RGCC, L…	upregulated
GO:0001568	blood vessel development	GO:BP	1.22e-07	784	152	ENSG00000066468, ENSG00000148848, ENSG00000151651, ENSG00000165757, ENSG00000099250, ENSG00000177283, ENSG00000128805, ENSG00000107731, ENSG00000108175, ENSG00000107796, ENSG00000187240, ENSG00000150782, ENSG00000076706, ENSG00000154133, ENSG00000109854, ENSG00000007372, ENSG00000110492, ENSG00000175592, ENSG00000162337, ENSG00000110195, ENSG00000079337, ENSG00000161791, ENSG00000139567, ENSG0000…	FGFR2, ADAM12, ADAM8, KIAA1462, NRP1, FZD8, ARHGAP22, UNC5B, ZMIZ1, ACTA2, DYNC2H1, IL18, MCAM, ROBO4, HTATIP2, PAX6, MDK, FOSL1, LRP5, FOLR1, RAPGEF3, FMNL3, ACVRL1, HMGA2, C3AR1, DCN, BTG1, FGF9, CDX2, FLT1, RGCC, KLF5, MMP14, BMP4, ZFP36L1, TJP1, SLC12A6, THBS1, SPINT1, NOX5, ANPEP, NR2F2, ITGAX, MMP2, GPR56, SERPINF1, CCL2, PLXDC1, JUP, DLX3, SPHK1, RNF213, MYH10, CDH2, CCBE1, PTPRM, JUNB, MI…	any
GO:0007165	signal transduction	GO:BP	1.28e-07	6296	861	ENSG00000107554, ENSG00000108018, ENSG00000138166, ENSG00000107518, ENSG00000151892, ENSG00000198873, ENSG00000203805, ENSG00000066468, ENSG00000019995, ENSG00000068383, ENSG00000151651, ENSG00000148484, ENSG00000099246, ENSG00000150054, ENSG00000095739, ENSG00000165757, ENSG00000107968, ENSG00000099250, ENSG00000177283, ENSG00000165731, ENSG00000204174, ENSG00000128805, ENSG00000198964, ENSG0000…	DNMBP, SORCS1, DUSP5, ATRNL1, GFRA1, GRK5, PPAPDC1A, FGFR2, ZRANB1, INPP5A, ADAM8, RSU1, RAB18, MPP7, BAMBI, KIAA1462, MAP3K8, NRP1, FZD8, RET, NPY4R, ARHGAP22, SGMS1, DKK1, RHOBTB1, ARID5B, SRGN, TSPAN15, UNC5B, MCU, PLAU, ZMIZ1, TSPAN14, ANKRD1, PIK3AP1, ANKRD2, DYNC2H1, RDX, CRYAB, IL18, DKK3, GRIK4, SORL1, UBASH3B, IGSF9B, RRAS2, DUSP8, LSP1, TSPAN32, FIBIN, LGR4, BDNF, CDKN1C, IFITM2, IFITM1…	any
GO:0032501	multicellular organismal process	GO:BP	1.53e-07	7873	552	ENSG00000099204, ENSG00000107518, ENSG00000203805, ENSG00000066468, ENSG00000148848, ENSG00000170430, ENSG00000151640, ENSG00000165996, ENSG00000078114, ENSG00000099246, ENSG00000095739, ENSG00000170759, ENSG00000122862, ENSG00000107738, ENSG00000122367, ENSG00000198682, ENSG00000107796, ENSG00000148677, ENSG00000095587, ENSG00000165887, ENSG00000109846, ENSG00000150782, ENSG00000150787, ENSG0000…	ABLIM1, ATRNL1, PPAPDC1A, FGFR2, ADAM12, MGMT, DPYSL4, PTPLA, NEBL, RAB18, BAMBI, KIF5B, SRGN, C10orf54, LDB3, PAPSS2, ACTA2, ANKRD1, TLL2, ANKRD2, CRYAB, IL18, PTS, CADM1, TAGLN, MPZL3, MCAM, SORL1, UBASH3B, KIRREL3, RRAS2, SOX6, HPS5, HTATIP2, LGR4, BDNF, PAX6, PKP3, OR51E2, TRIM6, DTX4, EHD1, PPP2R5B, LRP5, FOLR1, MTMR2, CNTN5, TXNRD1, CRY1, SRRM4, CCDC64, MSI1, STX2, MGP, PTPRO, C12orf39, PKP…	downregulated
GO:0031252	cell leading edge	GO:CC	1.62e-07	417	58	ENSG00000099204, ENSG00000107796, ENSG00000137710, ENSG00000204381, ENSG00000068831, ENSG00000139112, ENSG00000111450, ENSG00000151490, ENSG00000139132, ENSG00000127328, ENSG00000132970, ENSG00000136167, ENSG00000129474, ENSG00000073712, ENSG00000179841, ENSG00000072110, ENSG00000186297, ENSG00000159251, ENSG00000140416, ENSG00000237515, ENSG00000108852, ENSG00000109062, ENSG00000133026, ENSG0000…	ABLIM1, ACTA2, RDX, LAYN, RASGRP2, GABARAPL1, STX2, PTPRO, FGD4, RAB3IP, WASF3, LCP1, AJUBA, FERMT2, AKAP5, ACTN1, GABRA5, ACTC1, TPM1, SHISA9, MPP2, SLC9A3R1, MYH10, CDH2, EPB41L3, PTPRM, HMHA1, PALM, PDPN, PIP5K1A, ARPC5, ADORA1, ITSN1, INPP5J, EPB41L5, ARHGEF4, DYSF, FRMD4B, ROBO2, SH3RF1, SORBS2, SNX2, WWC1, PDLIM7, OCLN, NEDD9, DYNLT1, EZR, GPER1, CNTNAP2, AMPH, CYTH3, CDK6, PPP1R9A, DLC1, A…	downregulated
GO:2000147	positive regulation of cell motility	GO:BP	1.74e-07	584	121	ENSG00000151651, ENSG00000165757, ENSG00000099250, ENSG00000165731, ENSG00000107738, ENSG00000156026, ENSG00000122861, ENSG00000137710, ENSG00000076706, ENSG00000133818, ENSG00000110492, ENSG00000149781, ENSG00000176973, ENSG00000171860, ENSG00000183087, ENSG00000102678, ENSG00000102755, ENSG00000133110, ENSG00000157227, ENSG00000125378, ENSG00000131981, ENSG00000100600, ENSG00000104067, ENSG0000…	ADAM8, KIAA1462, NRP1, RET, C10orf54, MCU, PLAU, RDX, MCAM, RRAS2, MDK, FERMT3, FAM89B, C3AR1, GAS6, FGF9, FLT1, POSTN, MMP14, BMP4, LGALS3, LGMN, TJP1, THBS1, SEMA6D, FGF7, DAPK2, SMAD3, SEMA4B, IGF1R, CORO1A, PYCARD, ITGAX, LGALS9, GRB7, STAT5A, SMURF2, SOX9, SPHK1, NTN1, CCBE1, SERPINB3, MIR27A, MIR23A, TGFB1, SEMA6B, CSF1, PDPN, TNFSF18, PTGS2, PTPRC, TGFB2, AGT, AKT3, CYR61, RIN2, PREX1, BMP…	any
GO:0065008	regulation of biological quality	GO:BP	1.76e-07	4156	330	ENSG00000107554, ENSG00000099194, ENSG00000151651, ENSG00000107611, ENSG00000204740, ENSG00000099250, ENSG00000165731, ENSG00000128805, ENSG00000107984, ENSG00000122877, ENSG00000122861, ENSG00000184719, ENSG00000133805, ENSG00000197580, ENSG00000050165, ENSG00000023171, ENSG00000149564, ENSG00000151702, ENSG00000080854, ENSG00000064201, ENSG00000134569, ENSG00000213931, ENSG00000196565, ENSG0000…	DNMBP, SCD, ADAM8, CUBN, MALRD1, NRP1, RET, ARHGAP22, DKK1, EGR2, PLAU, RNLS, AMPD3, BCO2, DKK3, GRAMD1B, ESAM, FLI1, IGSF9B, TSPAN32, LRP4, HBE1, HBG2, SERPING1, SYT7, FERMT3, NRXN2, LTBP3, CNIH2, RIN1, TPP1, DGAT2, HVCN1, SH2B3, OAS1, OAS2, NOS1, LRRK2, RAPGEF3, FMNL3, ACVRL1, ITGA7, RDH5, B4GALNT1, AVIL, SCNN1A, TSPAN8, LIN7A, PPFIA2, C3AR1, POC1B, ATP2B1, DCN, A2M, TNFSF13B, POSTN, LPAR6, EDN…	upregulated
GO:0009887	animal organ morphogenesis	GO:BP	1.95e-07	1095	117	ENSG00000099250, ENSG00000165512, ENSG00000107984, ENSG00000165471, ENSG00000150347, ENSG00000108175, ENSG00000137745, ENSG00000151702, ENSG00000110492, ENSG00000134569, ENSG00000149489, ENSG00000168056, ENSG00000166341, ENSG00000188906, ENSG00000139567, ENSG00000166886, ENSG00000139263, ENSG00000011465, ENSG00000184564, ENSG00000183098, ENSG00000213145, ENSG00000157227, ENSG00000248905, ENSG0000…	NRP1, ZNF22, DKK1, MBL2, ARID5B, ZMIZ1, MMP13, FLI1, MDK, LRP4, ROM1, LTBP3, DCHS1, LRRK2, ACVRL1, NAB2, LRIG3, DCN, SLITRK6, GPC6, CRIP1, MMP14, FMN1, FGF7, WDR72, SMAD3, ITGAX, IRX3, MMP2, PARD6A, CCL2, WNK4, CCDC103, HOXB4, HOXB7, DLX3, FAM20A, SOX9, CCDC40, GAA, FSCN2, APCDD1, ACP5, TGFB1, CEACAM1, PLEKHA4, NTNG1, CSF1, VWA1, THBS3, BGLAP, PBX1, PRRX1, LHX9, LAMB3, WNT9A, COL8A2, ERRFI1, CYR6…	upregulated
GO:0051336	regulation of hydrolase activity	GO:BP	2.09e-07	1296	225	ENSG00000066468, ENSG00000170430, ENSG00000148484, ENSG00000099250, ENSG00000128805, ENSG00000107738, ENSG00000123243, ENSG00000108239, ENSG00000137710, ENSG00000109846, ENSG00000137642, ENSG00000259571, ENSG00000176697, ENSG00000026508, ENSG00000149131, ENSG00000068831, ENSG00000068971, ENSG00000175315, ENSG00000174791, ENSG00000177595, ENSG00000074590, ENSG00000089127, ENSG00000111335, ENSG0000…	FGFR2, MGMT, RSU1, NRP1, ARHGAP22, C10orf54, ITIH5, TBC1D12, RDX, CRYAB, SORL1, BLID, BDNF, CD44, SERPING1, RASGRP2, PPP2R5B, CST6, RIN1, PIDD, NUAK1, OAS1, OAS2, NOS1, OASL, RIMBP2, FGD4, LRRK2, RAPGEF3, PLEKHG6, A2M, GAS6, FLT1, HTR2A, FARP1, AJUBA, RIPK3, SEC23A, LGALS3, GPR65, LGMN, SERPINA1, PCSK6, THBS1, PLCB2, SPINT1, TPM1, SMAD3, NEIL1, RASGRF1, PYCARD, ARHGDIG, TFAP4, SERPINF1, LGALS9, A…	any
GO:0045664	regulation of neuron differentiation	GO:BP	2.27e-07	684	136	ENSG00000148803, ENSG00000099250, ENSG00000165731, ENSG00000107984, ENSG00000148677, ENSG00000176697, ENSG00000007372, ENSG00000148948, ENSG00000110492, ENSG00000134569, ENSG00000110047, ENSG00000068971, ENSG00000151490, ENSG00000188906, ENSG00000018236, ENSG00000135407, ENSG00000155974, ENSG00000139220, ENSG00000132932, ENSG00000136160, ENSG00000178235, ENSG00000125378, ENSG00000137872, ENSG0000…	FUOM, NRP1, RET, DKK1, ANKRD1, BDNF, PAX6, LRRC4C, MDK, LRP4, EHD1, PPP2R5B, PTPRO, LRRK2, CNTN1, AVIL, GRIP1, PPFIA2, ATP8A2, EDNRB, SLITRK1, BMP4, SEMA6D, NPTN, CHRNA3, SH3GL3, SEMA4B, GPRC5B, STX1B, IRX3, PMP22, SCARF1, SERPINF1, RNF112, ULK2, OMG, GFAP, MMD, SOX9, NTN1, CDH2, APOE, SEMA6B, LRRC4B, CACNG7, AMIGO1, NGF, DRAXIN, CHRNB2, EFNA1, TRIM46, PBX1, PRRX1, DNM3, RGS2, SYT2, AGT, DISC1, T…	any
GO:0098978	glutamatergic synapse	GO:CC	2.34e-07	368	84	ENSG00000099250, ENSG00000128805, ENSG00000122862, ENSG00000148948, ENSG00000011347, ENSG00000174871, ENSG00000151490, ENSG00000188906, ENSG00000111110, ENSG00000155974, ENSG00000139220, ENSG00000070961, ENSG00000132970, ENSG00000102468, ENSG00000118946, ENSG00000178235, ENSG00000183098, ENSG00000152767, ENSG00000072110, ENSG00000159251, ENSG00000156642, ENSG00000136379, ENSG00000140600, ENSG0000…	NRP1, ARHGAP22, SRGN, LRRC4C, SYT7, CNIH2, PTPRO, LRRK2, PPM1H, GRIP1, PPFIA2, ATP2B1, WASF3, HTR2A, PCDH17, SLITRK1, GPC6, FARP1, ACTN1, ACTC1, NPTN, ABHD17C, SH3GL3, ACAN, SHISA9, GSG1L, PRRT2, CORO1A, ADORA2B, MPP2, RGS9, CACNG4, GRIN2C, MYH10, CBLN2, OLFM2, GIPC1, APOE, LRRC4B, CACNG7, NTNG1, SLC6A17, BCAN, NOS1AP, DNM3, ACTN2, CHRM3, ITSN1, RTN4R, P2RX6, BCR, SCN2A, ERBB4, SLC30A3, NRXN1, SY…	any
GO:0031674	I band	GO:CC	2.39e-07	144	30	ENSG00000078114, ENSG00000122367, ENSG00000148677, ENSG00000165887, ENSG00000109846, ENSG00000196876, ENSG00000165410, ENSG00000073712, ENSG00000072110, ENSG00000159251, ENSG00000263155, ENSG00000101605, ENSG00000101608, ENSG00000118680, ENSG00000134775, ENSG00000159176, ENSG00000184588, ENSG00000162614, ENSG00000101335, ENSG00000149596, ENSG00000183023, ENSG00000172403, ENSG00000172399, ENSG0000…	NEBL, LDB3, ANKRD1, ANKRD2, CRYAB, SCN8A, CFL2, FERMT2, ACTN1, ACTC1, MYZAP, MYOM1, MYL12A, MYL12B, FHOD3, CSRP1, PDE4B, NEXN, MYL9, JPH2, SLC8A1, SYNPO2, MYOZ2, SORBS2, PDLIM7, FLNC, DNAJB6, PDLIM2, JPH1, PGM5	downregulated
GO:0006936	muscle contraction	GO:BP	2.56e-07	362	54	ENSG00000107796, ENSG00000165887, ENSG00000109846, ENSG00000134548, ENSG00000057294, ENSG00000196465, ENSG00000092841, ENSG00000132932, ENSG00000102468, ENSG00000159251, ENSG00000128872, ENSG00000138594, ENSG00000140416, ENSG00000182253, ENSG00000087258, ENSG00000183044, ENSG00000133020, ENSG00000109061, ENSG00000125414, ENSG00000109063, ENSG00000184185, ENSG00000046604, ENSG00000101605, ENSG0000…	ACTA2, ANKRD2, CRYAB, C12orf39, PKP2, MYL6B, MYL6, ATP8A2, HTR2A, ACTC1, TMOD2, TMOD3, TPM1, SYNM, GNAO1, ABAT, MYH8, MYH1, MYH2, MYH3, KCNJ12, DSG2, MYOM1, MYL12A, MYL12B, CNN1, MYH14, ATP1B1, TNNT2, TNNI1, LMOD1, ADORA1, AGT, HTR1D, PDE4B, SNTA1, MYL9, MYL1, SLC8A1, CALM2, DYSF, STAC, TNNC1, SLMAP, OXTR, ADRA2C, NMU, EDN1, CTGF, GPER1, CALD1, CACNA2D1, DOCK5, TPM2	downregulated
GO:0050808	synapse organization	GO:BP	2.64e-07	430	96	ENSG00000099250, ENSG00000128805, ENSG00000107984, ENSG00000122862, ENSG00000149571, ENSG00000080854, ENSG00000176697, ENSG00000148948, ENSG00000134569, ENSG00000110076, ENSG00000087053, ENSG00000149972, ENSG00000151490, ENSG00000188906, ENSG00000139220, ENSG00000132970, ENSG00000118946, ENSG00000178235, ENSG00000184564, ENSG00000183098, ENSG00000152767, ENSG00000072110, ENSG00000100600, ENSG0000…	NRP1, ARHGAP22, DKK1, SRGN, KIRREL3, IGSF9B, BDNF, LRRC4C, LRP4, NRXN2, MTMR2, CNTN5, PTPRO, LRRK2, PPFIA2, WASF3, PCDH17, SLITRK1, SLITRK6, GPC6, FARP1, ACTN1, LGMN, GABRB3, NPTN, ABHD17C, IGF1R, MPP2, SDK2, MYH10, NTN1, CDH2, CBLN2, APOE, LRRC4B, C3, PALM, NTNG1, AMIGO1, CHRNB2, EFNA1, BCAN, NOS1AP, DNM3, DISC1, NFIA, LZTS3, ITSN1, NEFH, CACNB4, TMEFF2, ERBB4, DNER, NGEF, KIF1A, NRXN1, KALRN, T…	any
GO:0030036	actin cytoskeleton organization	GO:BP	2.68e-07	679	135	ENSG00000078114, ENSG00000099250, ENSG00000072422, ENSG00000138347, ENSG00000156026, ENSG00000122367, ENSG00000148677, ENSG00000137710, ENSG00000149564, ENSG00000110492, ENSG00000139354, ENSG00000139132, ENSG00000079337, ENSG00000161791, ENSG00000135407, ENSG00000177425, ENSG00000132970, ENSG00000102760, ENSG00000136167, ENSG00000139734, ENSG00000152767, ENSG00000100842, ENSG00000165410, ENSG0000…	NEBL, NRP1, RHOBTB1, MYPN, MCU, LDB3, ANKRD1, RDX, ESAM, MDK, GAS2L3, FGD4, RAPGEF3, FMNL3, AVIL, PAWR, WASF3, RGCC, LCP1, DIAPH3, FARP1, EFS, CFL2, SPTB, ACTN1, GPR65, TJP1, FMN1, ACTC1, FGF7, TMOD2, TMOD3, CGNL1, TPM1, SMAD3, CORO1A, PYCARD, FHOD1, COTL1, MYH3, SPECC1, CORO6, FAM101B, FMNL1, SLC9A3R1, LLGL2, FSCN2, MYH10, MYOM1, FHOD3, SIGLEC15, EPB41L3, CNN1, TGFB1, MYH14, CDC42EP5, PIP5K1A, R…	any
GO:0010033	response to organic substance	GO:BP	2.73e-07	3421	281	ENSG00000099194, ENSG00000165757, ENSG00000099250, ENSG00000165731, ENSG00000107984, ENSG00000150347, ENSG00000122877, ENSG00000108175, ENSG00000184719, ENSG00000137745, ENSG00000050165, ENSG00000023171, ENSG00000198168, ENSG00000176971, ENSG00000185201, ENSG00000185885, ENSG00000142089, ENSG00000026508, ENSG00000185187, ENSG00000110492, ENSG00000213931, ENSG00000168056, ENSG00000176973, ENSG0000…	SCD, KIAA1462, NRP1, RET, DKK1, ARID5B, EGR2, ZMIZ1, RNLS, MMP13, DKK3, GRAMD1B, SVIP, FIBIN, IFITM2, IFITM1, IFITM3, CD44, SIGIRR, MDK, HBE1, LTBP3, FAM89B, FOSL1, TPP1, DGAT2, SH2B3, OAS1, OAS2, NOS1, OASL, LRRK2, RAPGEF3, ACVRL1, DUSP6, ATP2B1, DCN, TNFSF13B, TNFRSF19, POSTN, EDNRB, CRIP1, MMP14, IRF9, GNG2, ZFP36L1, LTBP2, FOS, RPS6KA5, GPR68, IFI27, SPINT1, FGF7, DYX1C1, SMAD3, CHRNA3, ISG20…	upregulated
GO:1902531	regulation of intracellular signal transduction	GO:BP	2.73e-07	1876	304	ENSG00000107554, ENSG00000138166, ENSG00000066468, ENSG00000151651, ENSG00000165757, ENSG00000107968, ENSG00000099250, ENSG00000177283, ENSG00000165731, ENSG00000128805, ENSG00000198964, ENSG00000107984, ENSG00000072422, ENSG00000107731, ENSG00000148677, ENSG00000155629, ENSG00000165887, ENSG00000137710, ENSG00000150782, ENSG00000137642, ENSG00000184545, ENSG00000121690, ENSG00000026508, ENSG0000…	DNMBP, DUSP5, FGFR2, ADAM8, KIAA1462, MAP3K8, NRP1, FZD8, RET, ARHGAP22, SGMS1, DKK1, RHOBTB1, UNC5B, ANKRD1, PIK3AP1, ANKRD2, RDX, IL18, SORL1, DUSP8, DEPDC7, CD44, PRR5L, OR51E2, PPP2R5B, PIDD, NUAK1, SH2B3, NOS1, DUSP16, FGD4, LRRK2, C1QL4, ERBB3, PLEKHG6, PTPRR, DUSP6, DCN, A2M, MCF2L, GAS6, FGF9, TNFRSF19, FLT1, HTR2A, LPAR6, NDFIP2, FARP1, GPR18, NDRG2, AJUBA, RIPK3, MBIP, BMP4, AKAP5, GPR6…	any
GO:0030036	actin cytoskeleton organization	GO:BP	2.76e-07	679	82	ENSG00000078114, ENSG00000072422, ENSG00000156026, ENSG00000122367, ENSG00000148677, ENSG00000137710, ENSG00000139354, ENSG00000139132, ENSG00000177425, ENSG00000132970, ENSG00000136167, ENSG00000139734, ENSG00000152767, ENSG00000165410, ENSG00000070182, ENSG00000072110, ENSG00000140030, ENSG00000104067, ENSG00000159251, ENSG00000128872, ENSG00000138594, ENSG00000128849, ENSG00000140416, ENSG0000…	NEBL, RHOBTB1, MCU, LDB3, ANKRD1, RDX, GAS2L3, FGD4, PAWR, WASF3, LCP1, DIAPH3, FARP1, CFL2, SPTB, ACTN1, GPR65, TJP1, ACTC1, TMOD2, TMOD3, CGNL1, TPM1, COTL1, MYH3, SPECC1, FAM101B, SLC9A3R1, LLGL2, MYH10, MYOM1, FHOD3, EPB41L3, CNN1, MYH14, PIP5K1A, ARHGEF10L, ARPC5, TNNT2, CSRP1, LMOD1, NUAK2, CNN3, DSTN, TRPM2, BCR, LIMK2, EPB41L5, THSD7B, RHOB, MRAS, PLS1, SYNPO2, MYOZ2, SORBS2, LIMCH1, KIAA…	downregulated
GO:0032940	secretion by cell	GO:BP	2.78e-07	1567	262	ENSG00000151651, ENSG00000099246, ENSG00000170759, ENSG00000204176, ENSG00000122862, ENSG00000156026, ENSG00000122861, ENSG00000108219, ENSG00000148677, ENSG00000133805, ENSG00000182985, ENSG00000137642, ENSG00000198168, ENSG00000205213, ENSG00000176697, ENSG00000026508, ENSG00000019505, ENSG00000110492, ENSG00000167332, ENSG00000121236, ENSG00000149131, ENSG00000011347, ENSG00000149781, ENSG0000…	ADAM8, RAB18, KIF5B, SYT15, SRGN, MCU, PLAU, TSPAN14, ANKRD1, AMPD3, CADM1, SORL1, SVIP, LGR4, BDNF, CD44, SYT13, MDK, OR51E2, TRIM6, SERPING1, SYT7, FERMT3, NRXN2, LRP5, CRY1, HVCN1, STX2, LRMP, LRRK2, RAPGEF3, LIN7A, PPFIA2, C3AR1, A2M, TNFSF13B, GAS6, POSTN, RGCC, HTR2A, STXBP6, LGALS3, SYT16, ACTN1, LTBP2, GPR68, SERPINA1, PCSK6, THBS1, FGF7, NOX5, ISLR, CHRNA3, NMB, ANPEP, MCTP2, SSTR5, SYNG…	any
GO:0001944	vasculature development	GO:BP	2.93e-07	820	156	ENSG00000066468, ENSG00000148848, ENSG00000151651, ENSG00000165757, ENSG00000099250, ENSG00000177283, ENSG00000128805, ENSG00000107731, ENSG00000108175, ENSG00000107796, ENSG00000187240, ENSG00000150782, ENSG00000076706, ENSG00000154133, ENSG00000109854, ENSG00000007372, ENSG00000110492, ENSG00000149489, ENSG00000175592, ENSG00000162337, ENSG00000110195, ENSG00000079337, ENSG00000161791, ENSG0000…	FGFR2, ADAM12, ADAM8, KIAA1462, NRP1, FZD8, ARHGAP22, UNC5B, ZMIZ1, ACTA2, DYNC2H1, IL18, MCAM, ROBO4, HTATIP2, PAX6, MDK, ROM1, FOSL1, LRP5, FOLR1, RAPGEF3, FMNL3, ACVRL1, HMGA2, C3AR1, DCN, BTG1, FGF9, CDX2, FLT1, RGCC, KLF5, MMP14, BMP4, ZFP36L1, TJP1, SLC12A6, THBS1, SPINT1, NOX5, ANPEP, NR2F2, ITGAX, MMP2, GPR56, SERPINF1, CCL2, PLXDC1, JUP, DLX3, SPHK1, RNF213, MYH10, CDH2, CCBE1, PTPRM, JU…	any
GO:0048666	neuron development	GO:BP	3.22e-07	1146	119	ENSG00000066468, ENSG00000151640, ENSG00000170759, ENSG00000148677, ENSG00000149571, ENSG00000176697, ENSG00000007372, ENSG00000110047, ENSG00000068971, ENSG00000110195, ENSG00000087053, ENSG00000139767, ENSG00000135127, ENSG00000151490, ENSG00000018236, ENSG00000155974, ENSG00000139304, ENSG00000074527, ENSG00000041515, ENSG00000132932, ENSG00000073910, ENSG00000133083, ENSG00000152767, ENSG0000…	FGFR2, DPYSL4, KIF5B, ANKRD1, KIRREL3, BDNF, PAX6, EHD1, PPP2R5B, FOLR1, MTMR2, SRRM4, CCDC64, PTPRO, CNTN1, GRIP1, PTPRQ, NTN4, MYO16, ATP8A2, FRY, DCLK1, FARP1, SPTB, CLMN, GABRA5, GABRB3, NPTN, RASGRF1, DOK4, PMP22, ULK2, SLC9A3R1, MYH10, NTN1, CDH2, EPB41L3, PTPRM, ATCAY, APOE, LRRC4B, CACNG7, RDH13, CAMSAP3, CELSR2, AMIGO1, TSPAN2, NGF, PHGDH, EFNA1, DNM3, TGFB2, AGT, DISC1, NEGR1, NEXN, LZT…	downregulated
GO:0010975	regulation of neuron projection development	GO:BP	3.22e-07	519	110	ENSG00000099250, ENSG00000165731, ENSG00000107984, ENSG00000148677, ENSG00000176697, ENSG00000148948, ENSG00000110492, ENSG00000134569, ENSG00000110047, ENSG00000068971, ENSG00000151490, ENSG00000188906, ENSG00000018236, ENSG00000135407, ENSG00000155974, ENSG00000139220, ENSG00000132932, ENSG00000178235, ENSG00000137872, ENSG00000156642, ENSG00000080644, ENSG00000185033, ENSG00000099365, ENSG0000…	NRP1, RET, DKK1, ANKRD1, BDNF, LRRC4C, MDK, LRP4, EHD1, PPP2R5B, PTPRO, LRRK2, CNTN1, AVIL, GRIP1, PPFIA2, ATP8A2, SLITRK1, SEMA6D, NPTN, CHRNA3, SEMA4B, STX1B, PMP22, SCARF1, SERPINF1, ULK2, OMG, GFAP, NTN1, CDH2, APOE, SEMA6B, LRRC4B, CACNG7, AMIGO1, NGF, DRAXIN, CHRNB2, EFNA1, TRIM46, PRRX1, DNM3, RGS2, SYT2, AGT, DISC1, NEGR1, LZTS3, PREX1, ITSN1, RTN4R, KREMEN1, INPP5J, MAP4K4, CHN1, MAP2, F…	any
GO:0000902	cell morphogenesis	GO:BP	3.22e-07	1068	113	ENSG00000066468, ENSG00000019995, ENSG00000151640, ENSG00000095739, ENSG00000170759, ENSG00000072422, ENSG00000137710, ENSG00000149571, ENSG00000110693, ENSG00000176697, ENSG00000007372, ENSG00000151490, ENSG00000139132, ENSG00000155974, ENSG00000139304, ENSG00000074527, ENSG00000041515, ENSG00000132932, ENSG00000132970, ENSG00000073910, ENSG00000133083, ENSG00000152767, ENSG00000073712, ENSG0000…	FGFR2, ZRANB1, DPYSL4, BAMBI, KIF5B, RHOBTB1, RDX, KIRREL3, SOX6, BDNF, PAX6, PTPRO, FGD4, GRIP1, PTPRQ, NTN4, MYO16, ATP8A2, WASF3, FRY, DCLK1, FARP1, FERMT2, SPTB, ACTN1, ATP10A, TPM1, NPTN, DOK4, ULK2, SLC9A3R1, UNC13D, MYH10, NTN1, CDH2, MYL12A, MYL12B, EPB41L3, PTPRM, WTIP, APOE, MYH14, LRRC4B, CACNG7, PALM, PALMD, CELSR2, AMIGO1, NGF, PDPN, EFNA1, DNM3, TGFB2, DISC1, NEXN, GBP1, LZTS3, PARD…	downregulated
GO:0031226	intrinsic component of plasma membrane	GO:CC	3.34e-07	1700	158	ENSG00000203805, ENSG00000066468, ENSG00000204174, ENSG00000198964, ENSG00000099282, ENSG00000108219, ENSG00000152779, ENSG00000149403, ENSG00000137642, ENSG00000205213, ENSG00000174669, ENSG00000110195, ENSG00000149972, ENSG00000151490, ENSG00000018236, ENSG00000111371, ENSG00000196876, ENSG00000065361, ENSG00000102755, ENSG00000133083, ENSG00000102468, ENSG00000118946, ENSG00000155465, ENSG0000…	PPAPDC1A, FGFR2, NPY4R, SGMS1, TSPAN15, TSPAN14, SLC16A12, GRIK4, SORL1, LGR4, SLC29A2, FOLR1, CNTN5, PTPRO, CNTN1, SLC38A1, SCN8A, ERBB3, FLT1, DCLK1, HTR2A, PCDH17, SLC7A7, SPTB, GPR65, GABRA5, GABRB3, NPTN, TSPAN3, TMC3, IGF1R, SHISA9, GSG1L, MMP15, ITGAE, MPP2, CACNG4, CDH2, PTPRM, OLFM2, FUT1, LRRC4B, CACNG7, GP6, PALM, KIAA1324, AMIGO1, SLC16A4, TSPAN2, PDPN, EFNA1, MPZL1, ATP1B1, NCF2, ADO…	downregulated
GO:0072358	cardiovascular system development	GO:BP	3.61e-07	829	157	ENSG00000066468, ENSG00000148848, ENSG00000151651, ENSG00000165757, ENSG00000099250, ENSG00000177283, ENSG00000128805, ENSG00000107731, ENSG00000108175, ENSG00000107796, ENSG00000187240, ENSG00000150782, ENSG00000076706, ENSG00000154133, ENSG00000109854, ENSG00000007372, ENSG00000110492, ENSG00000149489, ENSG00000175592, ENSG00000162337, ENSG00000110195, ENSG00000079337, ENSG00000161791, ENSG0000…	FGFR2, ADAM12, ADAM8, KIAA1462, NRP1, FZD8, ARHGAP22, UNC5B, ZMIZ1, ACTA2, DYNC2H1, IL18, MCAM, ROBO4, HTATIP2, PAX6, MDK, ROM1, FOSL1, LRP5, FOLR1, RAPGEF3, FMNL3, ACVRL1, HMGA2, C3AR1, DCN, BTG1, FGF9, CDX2, FLT1, RGCC, KLF5, MMP14, BMP4, ZFP36L1, TJP1, SLC12A6, THBS1, SPINT1, NOX5, ANPEP, NR2F2, ITGAX, MMP2, GPR56, SERPINF1, CCL2, PLXDC1, JUP, DLX3, SPHK1, RNF213, MYH10, NXN, CDH2, CCBE1, PTPR…	any
GO:0009611	response to wounding	GO:BP	3.72e-07	702	138	ENSG00000066468, ENSG00000099250, ENSG00000122861, ENSG00000198682, ENSG00000076706, ENSG00000154127, ENSG00000110756, ENSG00000064201, ENSG00000007372, ENSG00000026508, ENSG00000110492, ENSG00000213931, ENSG00000196565, ENSG00000149131, ENSG00000011347, ENSG00000149781, ENSG00000110047, ENSG00000110195, ENSG00000111252, ENSG00000139567, ENSG00000065361, ENSG00000127324, ENSG00000011465, ENSG0000…	FGFR2, NRP1, PLAU, PAPSS2, MCAM, UBASH3B, HPS5, TSPAN32, PAX6, CD44, MDK, HBE1, HBG2, SERPING1, SYT7, FERMT3, EHD1, FOLR1, SH2B3, ACVRL1, ERBB3, TSPAN8, DCN, A2M, GAS6, POSTN, KLF5, AJUBA, GNG2, ZFP36L1, SERPINA1, THBS1, FGF7, TPM1, SMAD3, PPL, ABAT, SCARF1, GFAP, GRIN2C, MYH10, MYL12A, CYP4F2, CYP4F11, F2RL3, ZFP36, TGFB1, CEACAM1, APOE, GP6, VAV3, PTGFRN, PDPN, FCER1G, CSRP1, C4BPB, KCNK2, TGFB…	any
GO:0032432	actin filament bundle	GO:CC	3.9e-07	76	21	ENSG00000099204, ENSG00000078114, ENSG00000122367, ENSG00000109846, ENSG00000136167, ENSG00000073712, ENSG00000072110, ENSG00000140416, ENSG00000183688, ENSG00000133026, ENSG00000101608, ENSG00000118680, ENSG00000105357, ENSG00000101335, ENSG00000120756, ENSG00000172403, ENSG00000064042, ENSG00000196923, ENSG00000120913, ENSG00000120156, ENSG00000154330	ABLIM1, NEBL, LDB3, CRYAB, LCP1, FERMT2, ACTN1, TPM1, FAM101B, MYH10, MYL12A, MYL12B, MYH14, MYL9, PLS1, SYNPO2, LIMCH1, PDLIM7, PDLIM2, TEK, PGM5	downregulated
GO:0061448	connective tissue development	GO:BP	4.61e-07	281	46	ENSG00000165471, ENSG00000150347, ENSG00000137745, ENSG00000026508, ENSG00000110492, ENSG00000168056, ENSG00000062282, ENSG00000139567, ENSG00000149948, ENSG00000213145, ENSG00000166949, ENSG00000125398, ENSG00000105329, ENSG00000184371, ENSG00000179403, ENSG00000169231, ENSG00000116132, ENSG00000133048, ENSG00000143816, ENSG00000142871, ENSG00000125965, ENSG00000125845, ENSG00000142156, ENSG0000…	MBL2, ARID5B, MMP13, CD44, MDK, LTBP3, DGAT2, ACVRL1, HMGA2, CRIP1, SMAD3, SOX9, TGFB1, CSF1, VWA1, THBS3, PRRX1, CHI3L1, WNT9A, CYR61, GDF5, BMP2, COL6A1, COL6A2, FRZB, SATB2, COL6A3, RARB, HYAL3, RP5-966M1.6, SMAD1, BMP3, BMPR1B, TGFBI, EGR1, ARRDC3, BMP5, ITGB8, NOV, CSGALNACT1, STC1, SULF1, COL27A1, NOTCH1, BGN, TIMP1	upregulated
GO:0042995	cell projection	GO:CC	4.72e-07	2288	199	ENSG00000107611, ENSG00000165757, ENSG00000099250, ENSG00000165731, ENSG00000183346, ENSG00000138347, ENSG00000187240, ENSG00000154133, ENSG00000080854, ENSG00000026508, ENSG00000019505, ENSG00000110492, ENSG00000134569, ENSG00000165923, ENSG00000011347, ENSG00000149489, ENSG00000149781, ENSG00000179532, ENSG00000176973, ENSG00000175592, ENSG00000174871, ENSG00000174791, ENSG00000089250, ENSG0000…	CUBN, KIAA1462, NRP1, RET, C10orf107, MYPN, DYNC2H1, ROBO4, IGSF9B, CD44, SYT13, MDK, LRP4, AGBL2, SYT7, ROM1, FERMT3, DNHD1, FAM89B, FOSL1, CNIH2, RIN1, NOS1, LRRK2, RAPGEF3, ACVRL1, KIF5A, AVIL, PLEKHG6, SCNN1A, PPFIA2, POC1B, ATP2B1, C12orf55, PCDH9, MOK, FOS, GLDN, DYX1C1, CHRNA3, ABHD17C, FAM154B, NMB, SSTR5, PRRT2, CORO1A, STX1B, IRX3, GPR56, FHOD1, PARD6A, HYDIN, TUBB3, SERPINF1, RNF112, T…	upregulated
GO:0036477	somatodendritic compartment	GO:CC	4.76e-07	863	159	ENSG00000170759, ENSG00000099250, ENSG00000165731, ENSG00000109846, ENSG00000149571, ENSG00000080854, ENSG00000176697, ENSG00000134569, ENSG00000011347, ENSG00000174871, ENSG00000174791, ENSG00000166405, ENSG00000087053, ENSG00000139112, ENSG00000089250, ENSG00000151490, ENSG00000188906, ENSG00000139567, ENSG00000155980, ENSG00000155974, ENSG00000139220, ENSG00000070961, ENSG00000102468, ENSG0000…	KIF5B, NRP1, RET, CRYAB, KIRREL3, IGSF9B, BDNF, LRP4, SYT7, CNIH2, RIN1, RIC3, MTMR2, GABARAPL1, NOS1, PTPRO, LRRK2, ACVRL1, KIF5A, GRIP1, PPFIA2, ATP2B1, HTR2A, FARP1, SAMD4A, AKAP5, MPP5, ADAM21, GABRA5, NPTN, CHRNA3, ABHD17C, PRRT2, PYCARD, GNAO1, TUBB3, SERPINF1, RNF112, TRPV1, PLXDC1, NR1D1, MPP2, CACNG4, CYGB, MYH10, GIPC1, CD22, ATCAY, TGFB1, KCNN4, APOE, KCNJ14, CACNG7, PALM, PALMD, SORT1…	any
GO:0099081	supramolecular polymer	GO:CC	6.01e-07	1001	105	ENSG00000078114, ENSG00000170759, ENSG00000122367, ENSG00000107796, ENSG00000148677, ENSG00000165887, ENSG00000109846, ENSG00000139354, ENSG00000139112, ENSG00000057294, ENSG00000139116, ENSG00000196876, ENSG00000167767, ENSG00000170442, ENSG00000205426, ENSG00000196465, ENSG00000177425, ENSG00000197614, ENSG00000198033, ENSG00000102781, ENSG00000136167, ENSG00000165410, ENSG00000073712, ENSG0000…	NEBL, KIF5B, LDB3, ACTA2, ANKRD1, ANKRD2, CRYAB, GAS2L3, GABARAPL1, PKP2, KIF21A, SCN8A, KRT80, KRT86, KRT81, MYL6B, PAWR, MFAP5, TUBA3C, KATNAL1, LCP1, CFL2, FERMT2, ACTN1, ACTC1, TMOD2, TMOD3, MYZAP, TPM1, SYNM, COTL1, MYH8, MYH1, MYH2, MYH3, SPECC1, KRTAP2-3, KRT34, SKA2, MYH10, MYOM1, MYL12A, MYL12B, FHOD3, MYH14, CAMSAP3, COL11A1, DNM3, TNNT2, TNNI1, CSRP1, LMOD1, KIF17, CCSAP, DISC1, KIF26B…	downregulated
GO:0051216	cartilage development	GO:BP	6.06e-07	216	39	ENSG00000165471, ENSG00000137745, ENSG00000026508, ENSG00000110492, ENSG00000168056, ENSG00000139567, ENSG00000149948, ENSG00000166949, ENSG00000125398, ENSG00000105329, ENSG00000179403, ENSG00000169231, ENSG00000116132, ENSG00000133048, ENSG00000143816, ENSG00000142871, ENSG00000125965, ENSG00000125845, ENSG00000142156, ENSG00000142173, ENSG00000162998, ENSG00000119042, ENSG00000163359, ENSG0000…	MBL2, MMP13, CD44, MDK, LTBP3, ACVRL1, HMGA2, SMAD3, SOX9, TGFB1, VWA1, THBS3, PRRX1, CHI3L1, WNT9A, CYR61, GDF5, BMP2, COL6A1, COL6A2, FRZB, SATB2, COL6A3, RARB, HYAL3, RP5-966M1.6, SMAD1, BMP3, BMPR1B, TGFBI, BMP5, ITGB8, NOV, CSGALNACT1, STC1, SULF1, COL27A1, BGN, TIMP1	upregulated
GO:0061564	axon development	GO:BP	6.28e-07	531	111	ENSG00000151892, ENSG00000066468, ENSG00000170759, ENSG00000099250, ENSG00000165731, ENSG00000122877, ENSG00000138347, ENSG00000107731, ENSG00000154133, ENSG00000176697, ENSG00000007372, ENSG00000148948, ENSG00000134569, ENSG00000110195, ENSG00000151490, ENSG00000155980, ENSG00000074527, ENSG00000132932, ENSG00000133083, ENSG00000178235, ENSG00000184564, ENSG00000070182, ENSG00000100784, ENSG0000…	GFRA1, FGFR2, KIF5B, NRP1, RET, EGR2, MYPN, UNC5B, ROBO4, BDNF, PAX6, LRRC4C, LRP4, FOLR1, PTPRO, KIF5A, NTN4, ATP8A2, DCLK1, SLITRK1, SLITRK6, SPTB, RPS6KA5, SEMA6D, NPTN, SEMA4B, DOK4, TUBB3, TUBB3, SCARF1, ULK2, OMG, GRB7, MYH10, NTN1, CDH2, PTPRM, APOE, SEMA6B, LRRC4B, NTNG1, AMIGO1, TSPAN2, NGF, DRAXIN, CHRNB2, SHC1, EFNA1, TRIM46, LHX9, DISC1, NEXN, PARD6B, DOK5, RTN4R, KREMEN1, NEFH, RAC2,…	any
GO:0030018	Z disc	GO:CC	6.3e-07	132	41	ENSG00000078114, ENSG00000138347, ENSG00000122367, ENSG00000109846, ENSG00000089250, ENSG00000196876, ENSG00000185567, ENSG00000165410, ENSG00000072110, ENSG00000263155, ENSG00000173801, ENSG00000101605, ENSG00000101608, ENSG00000118680, ENSG00000134775, ENSG00000198929, ENSG00000159176, ENSG00000077522, ENSG00000184588, ENSG00000162614, ENSG00000101335, ENSG00000149596, ENSG00000144285, ENSG0000…	NEBL, MYPN, LDB3, CRYAB, NOS1, SCN8A, AHNAK2, CFL2, ACTN1, MYZAP, JUP, MYOM1, MYL12A, MYL12B, FHOD3, NOS1AP, CSRP1, ACTN2, PDE4B, NEXN, MYL9, JPH2, SCN1A, XIRP2, FKBP1B, TRIM54, SLC8A1, SCN5A, PPP3CA, SYNPO2, MYOZ2, PDLIM3, SORBS2, KCNN2, PDLIM7, FLNC, DNAJB6, FBXO32, PDLIM2, JPH1, PGM5	any
GO:0031175	neuron projection development	GO:BP	6.99e-07	1017	108	ENSG00000066468, ENSG00000151640, ENSG00000170759, ENSG00000148677, ENSG00000149571, ENSG00000176697, ENSG00000007372, ENSG00000110047, ENSG00000068971, ENSG00000110195, ENSG00000135127, ENSG00000151490, ENSG00000018236, ENSG00000155974, ENSG00000074527, ENSG00000041515, ENSG00000132932, ENSG00000073910, ENSG00000133083, ENSG00000152767, ENSG00000070182, ENSG00000165959, ENSG00000156642, ENSG0000…	FGFR2, DPYSL4, KIF5B, ANKRD1, KIRREL3, BDNF, PAX6, EHD1, PPP2R5B, FOLR1, CCDC64, PTPRO, CNTN1, GRIP1, NTN4, MYO16, ATP8A2, FRY, DCLK1, FARP1, SPTB, CLMN, NPTN, RASGRF1, DOK4, PMP22, ULK2, SLC9A3R1, MYH10, NTN1, CDH2, EPB41L3, PTPRM, ATCAY, APOE, LRRC4B, CACNG7, CAMSAP3, CELSR2, AMIGO1, TSPAN2, NGF, PHGDH, EFNA1, DNM3, AGT, DISC1, NEGR1, NEXN, LZTS3, PARD6B, DOK5, ITSN1, RTN4R, KREMEN1, NEFH, INPP…	downregulated
GO:0009986	cell surface	GO:CC	8.39e-07	918	166	ENSG00000151892, ENSG00000066468, ENSG00000187908, ENSG00000151651, ENSG00000107611, ENSG00000099250, ENSG00000165471, ENSG00000099282, ENSG00000122861, ENSG00000108219, ENSG00000204381, ENSG00000109846, ENSG00000076706, ENSG00000166250, ENSG00000166106, ENSG00000064201, ENSG00000026508, ENSG00000134569, ENSG00000110195, ENSG00000149260, ENSG00000139055, ENSG00000139567, ENSG00000139626, ENSG0000…	GFRA1, FGFR2, DMBT1, ADAM8, CUBN, NRP1, MBL2, TSPAN15, PLAU, TSPAN14, LAYN, CRYAB, MCAM, CLMP, ADAMTS15, TSPAN32, CD44, LRP4, FOLR1, CAPN5, ERP27, ACVRL1, ITGB7, ITGA7, TSPAN8, PPFIA2, SLITRK6, GPC6, FERMT2, LGALS3, PCSK6, THBS1, GLDN, NPTN, ANPEP, GPRC5B, ITGAX, ITGAD, MSLN, SLC7A5, TRPV1, ITGAE, ACE, CACNG4, CDH2, DSG2, CRLF1, CD22, TGFB1, CEACAM1, PVR, BCAM, FLT3LG, CD33, GP6, C3, VCAM1, SORT1…	any
GO:0048699	generation of neurons	GO:BP	8.54e-07	1574	151	ENSG00000151892, ENSG00000148803, ENSG00000099250, ENSG00000177283, ENSG00000165731, ENSG00000107984, ENSG00000122877, ENSG00000138347, ENSG00000107731, ENSG00000187240, ENSG00000154133, ENSG00000148948, ENSG00000110492, ENSG00000134569, ENSG00000149489, ENSG00000089250, ENSG00000123095, ENSG00000188906, ENSG00000155980, ENSG00000135407, ENSG00000139220, ENSG00000133110, ENSG00000136160, ENSG0000…	GFRA1, FUOM, NRP1, FZD8, RET, DKK1, EGR2, MYPN, UNC5B, DYNC2H1, ROBO4, LRRC4C, MDK, LRP4, ROM1, NOS1, BHLHE41, LRRK2, KIF5A, AVIL, PPFIA2, POSTN, EDNRB, SLITRK1, SLITRK6, RPS6KA5, SPINT1, SEMA6D, GLDN, DYX1C1, CHRNA3, SEMA4B, STX1B, IRX3, GPR56, TUBB3, TUBB3, SCARF1, SERPINF1, RNF112, OMG, GRB7, NR1D1, GFAP, MMD, SOX9, FSCN2, HES7, IER2, TGFB1, SEMA6B, C3, NTNG1, CSF1, DRAXIN, TNFRSF1B, RAB13, CH…	upregulated
GO:0048514	blood vessel morphogenesis	GO:BP	8.55e-07	697	136	ENSG00000066468, ENSG00000148848, ENSG00000151651, ENSG00000165757, ENSG00000099250, ENSG00000177283, ENSG00000128805, ENSG00000107731, ENSG00000108175, ENSG00000150782, ENSG00000076706, ENSG00000154133, ENSG00000109854, ENSG00000110492, ENSG00000162337, ENSG00000110195, ENSG00000079337, ENSG00000161791, ENSG00000139567, ENSG00000149948, ENSG00000171860, ENSG00000011465, ENSG00000133639, ENSG0000…	FGFR2, ADAM12, ADAM8, KIAA1462, NRP1, FZD8, ARHGAP22, UNC5B, ZMIZ1, IL18, MCAM, ROBO4, HTATIP2, MDK, LRP5, FOLR1, RAPGEF3, FMNL3, ACVRL1, HMGA2, C3AR1, DCN, BTG1, FGF9, FLT1, RGCC, KLF5, MMP14, BMP4, ZFP36L1, TJP1, SLC12A6, THBS1, NOX5, ANPEP, NR2F2, ITGAX, MMP2, GPR56, SERPINF1, CCL2, PLXDC1, JUP, SPHK1, RNF213, CDH2, CCBE1, PTPRM, JUNB, MIR27A, MIR23A, TGFB1, CEACAM1, LRG1, APOE, C3, VAV3, SHC1…	any
GO:0097060	synaptic membrane	GO:CC	8.79e-07	390	86	ENSG00000099250, ENSG00000109846, ENSG00000149403, ENSG00000080854, ENSG00000148948, ENSG00000134569, ENSG00000011347, ENSG00000175592, ENSG00000174871, ENSG00000087053, ENSG00000149972, ENSG00000111450, ENSG00000151490, ENSG00000018236, ENSG00000155974, ENSG00000111052, ENSG00000070961, ENSG00000102468, ENSG00000118946, ENSG00000178695, ENSG00000178235, ENSG00000152767, ENSG00000186297, ENSG0000…	NRP1, CRYAB, GRIK4, IGSF9B, LRRC4C, LRP4, SYT7, FOSL1, CNIH2, MTMR2, CNTN5, STX2, PTPRO, CNTN1, GRIP1, LIN7A, ATP2B1, HTR2A, PCDH17, KCTD12, SLITRK1, FARP1, GABRA5, GABRB3, SHC4, NPTN, CHRNA3, ABHD17C, SHISA9, GSG1L, PRRT2, STX1B, TRPV1, MPP2, RGS9, CACNG4, GRIN2C, CDH2, OLFM2, LIN7B, LRRC4B, CACNG7, PALM, NTNG1, CHRNB2, DNM3, ADORA1, CNIH3, ACTN2, CHRM3, MX1, P2RX6, SCN2A, ERBB4, SLC8A1, NRXN1, …	any
GO:0008284	positive regulation of cell population proliferation	GO:BP	9.18e-07	969	105	ENSG00000165757, ENSG00000099250, ENSG00000108175, ENSG00000110492, ENSG00000168056, ENSG00000175592, ENSG00000139567, ENSG00000149948, ENSG00000102524, ENSG00000136160, ENSG00000182809, ENSG00000185634, ENSG00000140285, ENSG00000197696, ENSG00000102879, ENSG00000103490, ENSG00000140678, ENSG00000087245, ENSG00000205336, ENSG00000102878, ENSG00000168961, ENSG00000126561, ENSG00000131095, ENSG0000…	KIAA1462, NRP1, ZMIZ1, MDK, LTBP3, FOSL1, ACVRL1, HMGA2, TNFSF13B, EDNRB, CRIP2, SHC4, FGF7, NMB, CORO1A, PYCARD, ITGAX, MMP2, GPR56, HSF4, LGALS9, STAT5A, GFAP, SOX9, SPHK1, TNFSF13, SERPINB3, MIR27A, MIR23A, CRLF1, TGFB1, LRG1, C5AR2, FLT3LG, VCAM1, VAV3, CSF1, PTPN22, TNFRSF4, CHRNB2, SHC1, NES, PBX1, PRRX1, TNFSF4, GLUL, PTGS2, PTPRC, IL23R, PTGFR, CYR61, TGM2, ADRA1D, ADA, NFATC2, BMP2, RAC2…	upregulated
GO:0022604	regulation of cell morphogenesis	GO:BP	9.68e-07	508	66	ENSG00000019995, ENSG00000095739, ENSG00000072422, ENSG00000137710, ENSG00000176697, ENSG00000151490, ENSG00000139132, ENSG00000155974, ENSG00000132970, ENSG00000073712, ENSG00000206190, ENSG00000140416, ENSG00000083290, ENSG00000109062, ENSG00000092929, ENSG00000133026, ENSG00000065320, ENSG00000170558, ENSG00000101608, ENSG00000118680, ENSG00000082397, ENSG00000142279, ENSG00000130203, ENSG0000…	ZRANB1, BAMBI, RHOBTB1, RDX, BDNF, PTPRO, FGD4, GRIP1, WASF3, FERMT2, ATP10A, TPM1, ULK2, SLC9A3R1, UNC13D, MYH10, NTN1, CDH2, MYL12A, MYL12B, EPB41L3, WTIP, APOE, MYH14, LRRC4B, CACNG7, PALM, PALMD, AMIGO1, NGF, PDPN, EFNA1, DNM3, DISC1, GBP1, LZTS3, RTN4R, LIMS2, CHN1, RHOB, MAP2, NGEF, KIF1A, KALRN, CSPG5, SEMA3B, WNT5A, ROBO2, NEDD9, EZR, TUBB2B, RIMS1, NRCAM, HECW1, SEMA3E, SEMA3D, PPP1R9A, …	downregulated
GO:0031224	intrinsic component of membrane	GO:CC	1e-06	5842	427	ENSG00000107518, ENSG00000203805, ENSG00000066468, ENSG00000148848, ENSG00000165996, ENSG00000148483, ENSG00000095739, ENSG00000204176, ENSG00000204174, ENSG00000198964, ENSG00000099282, ENSG00000171224, ENSG00000107738, ENSG00000122863, ENSG00000156026, ENSG00000108219, ENSG00000152779, ENSG00000176273, ENSG00000241935, ENSG00000072952, ENSG00000204381, ENSG00000182985, ENSG00000110328, ENSG0000…	ATRNL1, PPAPDC1A, FGFR2, ADAM12, PTPLA, TMEM236, BAMBI, SYT15, NPY4R, SGMS1, TSPAN15, C10orf35, C10orf54, CHST3, MCU, TSPAN14, SLC16A12, SLC35G1, HOGA1, MRVI1, LAYN, CADM1, GALNT18, PCSK7, MPZL3, MCAM, GRIK4, SC5D, SORL1, KIRREL3, TMEM45B, TMEM86A, ANO5, LGR4, PAX6, PRRG4, TP53I11, OR51E2, LRRN4CL, GAL3ST3, TMEM151A, SLC29A2, LRP5, FOLR1, CYB5R2, RIC3, SMCO4, CNTN5, ANO4, CHPT1, STYK1, HRK, STX2,…	downregulated
GO:0050896	response to stimulus	GO:BP	1.08e-06	9455	1223	ENSG00000107554, ENSG00000099194, ENSG00000065621, ENSG00000108018, ENSG00000138166, ENSG00000107518, ENSG00000151892, ENSG00000198873, ENSG00000203805, ENSG00000066468, ENSG00000187908, ENSG00000019995, ENSG00000170430, ENSG00000151640, ENSG00000068383, ENSG00000151651, ENSG00000148484, ENSG00000107611, ENSG00000099246, ENSG00000150054, ENSG00000095739, ENSG00000165757, ENSG00000107968, ENSG0000…	DNMBP, SCD, GSTO2, SORCS1, DUSP5, ATRNL1, GFRA1, GRK5, PPAPDC1A, FGFR2, DMBT1, ZRANB1, MGMT, DPYSL4, INPP5A, ADAM8, RSU1, CUBN, RAB18, MPP7, BAMBI, KIAA1462, MAP3K8, KIF5B, NRP1, FZD8, RET, SYT15, NPY4R, ARHGAP22, SGMS1, DKK1, MBL2, RHOBTB1, ARID5B, EGR2, MYPN, SRGN, TSPAN15, UNC5B, C10orf54, MCU, PLAU, ZMIZ1, TSPAN14, PAPSS2, RNLS, ACTA2, SLC16A12, ANKRD1, PIK3AP1, ANKRD2, MMP13, DYNC2H1, AMPD3,…	any
GO:0022603	regulation of anatomical structure morphogenesis	GO:BP	1.27e-06	1194	122	ENSG00000107554, ENSG00000165757, ENSG00000099250, ENSG00000165731, ENSG00000107984, ENSG00000026508, ENSG00000148948, ENSG00000110492, ENSG00000134569, ENSG00000188906, ENSG00000079337, ENSG00000161791, ENSG00000139567, ENSG00000135424, ENSG00000149948, ENSG00000139220, ENSG00000171860, ENSG00000011465, ENSG00000133639, ENSG00000102524, ENSG00000133110, ENSG00000102760, ENSG00000178235, ENSG0000…	DNMBP, KIAA1462, NRP1, RET, DKK1, CD44, LRRC4C, MDK, LRP4, LRRK2, RAPGEF3, FMNL3, ACVRL1, ITGA7, HMGA2, PPFIA2, C3AR1, DCN, BTG1, TNFSF13B, POSTN, RGCC, SLITRK1, GPC6, SYNE3, SEMA6D, FGF7, CHRNA3, SEMA4B, CORO1A, ITGAX, PARD6A, SERPINF1, OMG, CCL2, JUP, FMNL1, HOXB7, SOX9, SPHK1, APCDD1, MIR27A, MIR23A, GDF15, TGFB1, CEACAM1, LRG1, SEMA6B, PLEKHA4, FLT3LG, CDC42EP5, C3, CSF1, DRAXIN, TNFRSF1B, CH…	upregulated
GO:0051093	negative regulation of developmental process	GO:BP	1.29e-06	1072	190	ENSG00000148803, ENSG00000099250, ENSG00000107984, ENSG00000122862, ENSG00000095587, ENSG00000165887, ENSG00000150782, ENSG00000137642, ENSG00000154127, ENSG00000110693, ENSG00000176697, ENSG00000007372, ENSG00000110492, ENSG00000134569, ENSG00000121236, ENSG00000168056, ENSG00000162337, ENSG00000087053, ENSG00000151490, ENSG00000123095, ENSG00000057294, ENSG00000188906, ENSG00000079337, ENSG0000…	FUOM, NRP1, DKK1, SRGN, TLL2, ANKRD2, IL18, SORL1, UBASH3B, SOX6, BDNF, PAX6, MDK, LRP4, TRIM6, LTBP3, LRP5, MTMR2, PTPRO, BHLHE41, PKP2, LRRK2, RAPGEF3, C1QL4, ACVRL1, HMGA2, DCN, GAS6, FGF9, POSTN, RGCC, EDNRB, BMP4, ZFP36L1, JDP2, GPR68, LGMN, THBS1, SEMA6D, SMAD3, SEMA4B, STX1B, NKD1, IRX3, GPR56, PMP22, SERPINF1, ULK2, FAM101B, OMG, TRPV1, NR1D1, GFAP, AXIN2, ABCA5, SOX9, NTN1, LDLRAD4, ALPK…	any
GO:0000165	MAPK cascade	GO:BP	1.37e-06	940	171	ENSG00000138166, ENSG00000151892, ENSG00000066468, ENSG00000151651, ENSG00000165757, ENSG00000107968, ENSG00000099250, ENSG00000177283, ENSG00000165731, ENSG00000107984, ENSG00000109846, ENSG00000150782, ENSG00000137642, ENSG00000184545, ENSG00000026508, ENSG00000111252, ENSG00000111266, ENSG00000188906, ENSG00000186897, ENSG00000065361, ENSG00000153233, ENSG00000139318, ENSG00000183087, ENSG0000…	DUSP5, GFRA1, FGFR2, ADAM8, KIAA1462, MAP3K8, NRP1, FZD8, RET, DKK1, CRYAB, IL18, SORL1, DUSP8, CD44, SH2B3, DUSP16, LRRK2, C1QL4, ERBB3, PTPRR, DUSP6, GAS6, FGF9, TNFRSF19, FLT1, HTR2A, NDRG2, AJUBA, MBIP, BMP4, SPTB, ZFP36L1, THBS1, FGF7, TNFAIP8L3, NPTN, RASGRF1, IGF1R, LAT, PYCARD, DOK4, MARVELD3, ADORA2B, LGALS9, CCL2, DUSP3, SOX9, SLC9A3R1, SPHK1, CDH2, GAREM, MAPK4, SERPINB3, MIR27A, MIR23…	any
GO:0045202	synapse	GO:CC	1.38e-06	1362	131	ENSG00000066468, ENSG00000099246, ENSG00000122862, ENSG00000109846, ENSG00000182985, ENSG00000149403, ENSG00000149571, ENSG00000176697, ENSG00000068831, ENSG00000174669, ENSG00000166405, ENSG00000087053, ENSG00000149972, ENSG00000111450, ENSG00000151490, ENSG00000018236, ENSG00000111110, ENSG00000155974, ENSG00000132970, ENSG00000133083, ENSG00000102468, ENSG00000118946, ENSG00000178695, ENSG0000…	FGFR2, RAB18, SRGN, CRYAB, CADM1, GRIK4, KIRREL3, BDNF, RASGRP2, SLC29A2, RIC3, MTMR2, CNTN5, STX2, PTPRO, CNTN1, PPM1H, GRIP1, WASF3, DCLK1, HTR2A, PCDH17, KCTD12, FARP1, SAMD4A, AKAP5, ACTN1, GABRA5, GABRB3, ACTC1, TMOD2, NPTN, C15orf59, SH3GL3, ACAN, SHISA9, SYNGR3, GSG1L, PMP22, MPP2, RGS9, CACNG4, SDK2, RAB40B, MYH10, CDH2, EPB41L3, OLFM2, GIPC1, ATCAY, APOE, LIN7B, LRRC4B, CACNG7, PALM, PAL…	downregulated
GO:0051179	localization	GO:BP	1.43e-06	6889	495	ENSG00000108018, ENSG00000187908, ENSG00000151651, ENSG00000107611, ENSG00000165757, ENSG00000099250, ENSG00000165731, ENSG00000107984, ENSG00000165471, ENSG00000150347, ENSG00000122877, ENSG00000122861, ENSG00000187240, ENSG00000133805, ENSG00000023171, ENSG00000149564, ENSG00000154133, ENSG00000134955, ENSG00000198168, ENSG00000185885, ENSG00000026508, ENSG00000019505, ENSG00000110492, ENSG0000…	SORCS1, DMBT1, ADAM8, CUBN, KIAA1462, NRP1, RET, DKK1, MBL2, ARID5B, EGR2, PLAU, DYNC2H1, AMPD3, GRAMD1B, ESAM, ROBO4, SLC37A2, SVIP, IFITM1, CD44, SYT13, MDK, LRP4, HBE1, HBG2, SERPING1, SYT7, AHNAK, FERMT3, NRXN2, FAM89B, CNIH2, RIN1, TPP1, DCHS1, DGAT2, HVCN1, OAS2, NOS1, CACNA2D4, LRMP, REP15, TSPAN11, LRRK2, RAPGEF3, FMNL3, ACVRL1, ITGB7, STAC3, KIF5A, SLC26A10, B4GALNT1, SCNN1A, LIN7A, PPFI…	upregulated
GO:0032102	negative regulation of response to external stimulus	GO:BP	1.5e-06	417	58	ENSG00000099250, ENSG00000122861, ENSG00000185187, ENSG00000110492, ENSG00000149131, ENSG00000111252, ENSG00000127324, ENSG00000175899, ENSG00000125245, ENSG00000137872, ENSG00000166949, ENSG00000185033, ENSG00000103490, ENSG00000132386, ENSG00000168961, ENSG00000108691, ENSG00000126368, ENSG00000108771, ENSG00000101695, ENSG00000206073, ENSG00000102575, ENSG00000128016, ENSG00000079385, ENSG0000…	NRP1, PLAU, SIGIRR, MDK, SERPING1, SH2B3, TSPAN8, A2M, GPR18, SEMA6D, SMAD3, SEMA4B, PYCARD, SERPINF1, LGALS9, CCL2, NR1D1, DHX58, RNF125, SERPINB4, ACP5, ZFP36, CEACAM1, SEMA6B, C5AR2, TNFRSF1B, DCST1, IFI16, PTPRC, ADA, TNFAIP6, DPP4, FAP, CALCRL, SERPINE2, UCN, PPARG, APOD, FGB, FGG, PDGFRA, SPP1, SPINK5, C1QTNF3, GJA1, TNFAIP3, CD109, NT5E, SEMA3C, HGF, SEMA3A, NOV, TRIB1, ANGPT2, KLF4, C5, N…	upregulated
GO:0098742	cell-cell adhesion via plasma-membrane adhesion molecules	GO:BP	1.51e-06	275	44	ENSG00000182985, ENSG00000149571, ENSG00000118946, ENSG00000129474, ENSG00000156642, ENSG00000069188, ENSG00000170558, ENSG00000046604, ENSG00000173482, ENSG00000073008, ENSG00000131409, ENSG00000143126, ENSG00000181754, ENSG00000092969, ENSG00000162614, ENSG00000125966, ENSG00000179915, ENSG00000163347, ENSG00000144619, ENSG00000008300, ENSG00000185008, ENSG00000196159, ENSG00000197410, ENSG0000…	CADM1, KIRREL3, PCDH17, AJUBA, NPTN, SDK2, CDH2, DSG2, PTPRM, PVR, LRRC4B, CELSR2, AMIGO1, TGFB2, NEXN, MMP24, NRXN1, CLDN1, CNTN4, CELSR3, ROBO2, FAT4, DCHS2, CLDN22, PCDH7, PCDHA1, PCDHA3, PCDHA4, PCDHA5, PCDHA7, PCDHA8, PCDHA9, PCDHA10, PCDHA11, PCDHA12, PCDHA13, PCDHAC1, PCDHB3, EMB, SDK1, PTPRD, GPC4, L1CAM, PCDH11X	downregulated
GO:0042060	wound healing	GO:BP	1.52e-06	584	118	ENSG00000066468, ENSG00000122861, ENSG00000198682, ENSG00000076706, ENSG00000154127, ENSG00000110756, ENSG00000064201, ENSG00000026508, ENSG00000110492, ENSG00000213931, ENSG00000196565, ENSG00000149131, ENSG00000011347, ENSG00000149781, ENSG00000110047, ENSG00000111252, ENSG00000139567, ENSG00000065361, ENSG00000127324, ENSG00000011465, ENSG00000175899, ENSG00000183087, ENSG00000133110, ENSG0000…	FGFR2, PLAU, PAPSS2, MCAM, UBASH3B, HPS5, TSPAN32, CD44, MDK, HBE1, HBG2, SERPING1, SYT7, FERMT3, EHD1, SH2B3, ACVRL1, ERBB3, TSPAN8, DCN, A2M, GAS6, POSTN, KLF5, AJUBA, GNG2, SERPINA1, THBS1, TPM1, SMAD3, PPL, ABAT, MYH10, MYL12A, CYP4F2, CYP4F11, F2RL3, TGFB1, CEACAM1, APOE, GP6, VAV3, PTGFRN, PDPN, FCER1G, CSRP1, C4BPB, TGFB2, CYR61, FOXA2, MYL9, P2RX6, LARGE, SCUBE1, CELSR1, MERTK, PROC, FAP,…	any
GO:0048869	cellular developmental process	GO:BP	1.57e-06	4531	345	ENSG00000198873, ENSG00000066468, ENSG00000019995, ENSG00000148848, ENSG00000170430, ENSG00000151640, ENSG00000078114, ENSG00000095739, ENSG00000170759, ENSG00000072422, ENSG00000107738, ENSG00000122367, ENSG00000107796, ENSG00000148677, ENSG00000095587, ENSG00000165887, ENSG00000137710, ENSG00000150782, ENSG00000182985, ENSG00000149591, ENSG00000137642, ENSG00000154127, ENSG00000149571, ENSG0000…	GRK5, FGFR2, ZRANB1, ADAM12, MGMT, DPYSL4, NEBL, BAMBI, KIF5B, RHOBTB1, C10orf54, LDB3, ACTA2, ANKRD1, TLL2, ANKRD2, RDX, IL18, CADM1, TAGLN, SORL1, UBASH3B, KIRREL3, RRAS2, SOX6, HTATIP2, LGR4, BDNF, PAX6, PKP3, OR51E2, TRIM6, EHD1, PPP2R5B, LRP5, FOLR1, MTMR2, NUAK1, SRRM4, CCDC64, STX2, MGP, PTPRO, FGD4, PKP2, CNTN1, KRT80, KRT86, KRT81, ERBB3, DPY19L2, GRIP1, PAWR, PTPRQ, NTN4, MYO16, GAS6, F…	downregulated
GO:0000902	cell morphogenesis	GO:BP	1.58e-06	1068	112	ENSG00000107554, ENSG00000151892, ENSG00000151651, ENSG00000099250, ENSG00000165731, ENSG00000107984, ENSG00000165471, ENSG00000122877, ENSG00000138347, ENSG00000107731, ENSG00000154133, ENSG00000026508, ENSG00000148948, ENSG00000110492, ENSG00000134569, ENSG00000149781, ENSG00000188906, ENSG00000161791, ENSG00000139626, ENSG00000135424, ENSG00000155980, ENSG00000139220, ENSG00000133110, ENSG0000…	DNMBP, GFRA1, ADAM8, NRP1, RET, DKK1, MBL2, EGR2, MYPN, UNC5B, ROBO4, CD44, LRRC4C, MDK, LRP4, FERMT3, LRRK2, FMNL3, ITGB7, ITGA7, KIF5A, PPFIA2, POSTN, SLITRK1, SLITRK6, RPS6KA5, SYNE3, SEMA6D, CHRNA3, SEMA4B, CORO1A, TUBB3, TUBB3, OMG, CCL2, GRB7, FMNL1, SEMA6B, CDC42EP5, NTNG1, DRAXIN, VWA1, CHRNB2, SHC1, TRIM46, NES, LHX9, SYT2, LAMB3, EPB41, PREX1, COL6A1, COL6A2, RAC2, MAP4K4, MERTK, ARHGAP…	upregulated
GO:0030424	axon	GO:CC	1.69e-06	647	125	ENSG00000170759, ENSG00000099250, ENSG00000165731, ENSG00000138347, ENSG00000109846, ENSG00000154133, ENSG00000149571, ENSG00000176697, ENSG00000019505, ENSG00000011347, ENSG00000087053, ENSG00000089250, ENSG00000151490, ENSG00000188906, ENSG00000111371, ENSG00000196876, ENSG00000155980, ENSG00000135407, ENSG00000139220, ENSG00000102468, ENSG00000184226, ENSG00000165795, ENSG00000072415, ENSG0000…	KIF5B, NRP1, RET, MYPN, CRYAB, ROBO4, KIRREL3, BDNF, SYT13, SYT7, MTMR2, NOS1, PTPRO, LRRK2, SLC38A1, SCN8A, KIF5A, AVIL, PPFIA2, HTR2A, PCDH9, NDRG2, MPP5, ADAM21, GLDN, TMOD2, NPTN, RASGRF1, IGF1R, PRRT2, CORO1A, STX1B, IRX3, TUBB3, SERPINF1, MYH10, RAB27B, EPB41L3, TSHZ3, ATCAY, TGFB1, MYH14, LRRC4B, CACNG7, PALM, AMIGO1, NGF, TNFRSF1B, TRIM46, DNM3, GLUL, NMNAT2, ARPC5, NAV1, SYT2, ADORA1, KC…	any
GO:0009986	cell surface	GO:CC	1.88e-06	918	97	ENSG00000151892, ENSG00000187908, ENSG00000151651, ENSG00000107611, ENSG00000099250, ENSG00000165471, ENSG00000122861, ENSG00000166250, ENSG00000064201, ENSG00000026508, ENSG00000134569, ENSG00000149260, ENSG00000139567, ENSG00000139626, ENSG00000135424, ENSG00000127324, ENSG00000139220, ENSG00000184564, ENSG00000183098, ENSG00000131981, ENSG00000186417, ENSG00000166825, ENSG00000140678, ENSG0000…	GFRA1, DMBT1, ADAM8, CUBN, NRP1, MBL2, PLAU, CLMP, TSPAN32, CD44, LRP4, CAPN5, ACVRL1, ITGB7, ITGA7, TSPAN8, PPFIA2, SLITRK6, GPC6, LGALS3, GLDN, ANPEP, ITGAX, ITGAD, TRPV1, ACE, CRLF1, CD22, TGFB1, CEACAM1, BCAM, FLT3LG, CD33, C3, VCAM1, TNFRSF4, CHRNB2, FCER1G, TNFSF18, TNFSF4, PTPRC, KCNK2, IL23R, TNFRSF9, ADA, BMP2, PLA2R1, DPP4, FAP, ITGA4, SERPINE2, TRPM8, TGFA, P2RY1, MME, NRROS, SCN5A, DC…	upregulated
GO:0031589	cell-substrate adhesion	GO:BP	1.89e-06	355	52	ENSG00000099250, ENSG00000122861, ENSG00000026508, ENSG00000110492, ENSG00000149781, ENSG00000139567, ENSG00000139626, ENSG00000135424, ENSG00000139220, ENSG00000133110, ENSG00000157227, ENSG00000248905, ENSG00000166949, ENSG00000102879, ENSG00000173801, ENSG00000187244, ENSG00000167614, ENSG00000162692, ENSG00000184371, ENSG00000143127, ENSG00000169231, ENSG00000196878, ENSG00000116962, ENSG0000…	NRP1, PLAU, CD44, MDK, FERMT3, ACVRL1, ITGB7, ITGA7, PPFIA2, POSTN, MMP14, FMN1, SMAD3, CORO1A, JUP, BCAM, TTYH1, VCAM1, CSF1, ITGA10, THBS3, LAMB3, NID1, ACTN2, CYR61, RIN2, PREX1, RAC2, MAP4K4, MERTK, ITGA4, FN1, SNED1, EMILIN1, ABI3BP, BCL6, APOD, FGB, FGG, SPOCK1, FAT2, ITGA2, VEGFA, LAMB4, AGR2, ITGB8, ANGPT1, HAS2, ANGPT2, LAMC3, NOTCH1, JAK2	upregulated
GO:0001501	skeletal system development	GO:BP	2.08e-06	535	110	ENSG00000066468, ENSG00000165471, ENSG00000150347, ENSG00000198682, ENSG00000137745, ENSG00000151702, ENSG00000110693, ENSG00000026508, ENSG00000110492, ENSG00000168056, ENSG00000166341, ENSG00000162337, ENSG00000111252, ENSG00000111341, ENSG00000139567, ENSG00000166886, ENSG00000149948, ENSG00000102678, ENSG00000157227, ENSG00000125378, ENSG00000133985, ENSG00000053254, ENSG00000119714, ENSG0000…	FGFR2, MBL2, ARID5B, PAPSS2, MMP13, FLI1, SOX6, CD44, MDK, LTBP3, DCHS1, LRP5, SH2B3, MGP, ACVRL1, NAB2, HMGA2, FGF9, MMP14, BMP4, TTC9, FOXN3, GPR68, FMN1, SMAD3, ACAN, MMP2, FAM101B, SPNS2, HOXB4, HOXB7, AXIN2, SOX9, HES7, SIGLEC15, ACP5, DLL3, TGFB1, COL11A1, VWA1, THBS3, BGLAP, BCAN, PBX1, PRRX1, PTPRC, CHI3L1, TGFB2, WNT9A, CYR61, GDF5, BMP2, COL6A1, COL6A2, EN1, GLI2, FRZB, NAB1, SATB2, MAT…	any
GO:0048729	tissue morphogenesis	GO:BP	2.08e-06	686	133	ENSG00000066468, ENSG00000099250, ENSG00000165731, ENSG00000107984, ENSG00000165471, ENSG00000107796, ENSG00000148677, ENSG00000205213, ENSG00000026508, ENSG00000110492, ENSG00000166341, ENSG00000162337, ENSG00000110195, ENSG00000198431, ENSG00000057294, ENSG00000139567, ENSG00000149948, ENSG00000074527, ENSG00000183098, ENSG00000157227, ENSG00000129474, ENSG00000125378, ENSG00000072415, ENSG0000…	FGFR2, NRP1, RET, DKK1, MBL2, ACTA2, ANKRD1, LGR4, CD44, MDK, DCHS1, LRP5, FOLR1, TXNRD1, PKP2, ACVRL1, HMGA2, NTN4, GPC6, MMP14, AJUBA, BMP4, MPP5, FMN1, ACTC1, SPINT1, FGF7, TPM1, SMAD3, ITGAX, NKD1, IRX3, PARD6A, KRT17, WNK4, CCDC103, HOXB4, HOXB7, SMURF2, SOX9, SLC9A3R1, CCDC40, NTN1, MYOM1, TWSG1, TGFB1, CEACAM1, PLEKHA4, CAMSAP3, COL11A1, CELSR2, CSF1, VWA1, PDPN, PBX1, TNNT2, TNNI1, TGFB2,…	any
GO:0120025	plasma membrane bounded cell projection	GO:CC	2.12e-06	2200	190	ENSG00000107611, ENSG00000165757, ENSG00000099250, ENSG00000165731, ENSG00000183346, ENSG00000138347, ENSG00000187240, ENSG00000154133, ENSG00000080854, ENSG00000026508, ENSG00000019505, ENSG00000134569, ENSG00000165923, ENSG00000011347, ENSG00000149489, ENSG00000179532, ENSG00000176973, ENSG00000175592, ENSG00000174871, ENSG00000174791, ENSG00000089250, ENSG00000188906, ENSG00000079337, ENSG0000…	CUBN, KIAA1462, NRP1, RET, C10orf107, MYPN, DYNC2H1, ROBO4, IGSF9B, CD44, SYT13, LRP4, AGBL2, SYT7, ROM1, DNHD1, FAM89B, FOSL1, CNIH2, RIN1, NOS1, LRRK2, RAPGEF3, ACVRL1, KIF5A, AVIL, PLEKHG6, SCNN1A, PPFIA2, POC1B, ATP2B1, C12orf55, PCDH9, MOK, FOS, GLDN, DYX1C1, CHRNA3, ABHD17C, FAM154B, NMB, SSTR5, PRRT2, CORO1A, STX1B, IRX3, GPR56, FHOD1, PARD6A, HYDIN, TUBB3, SERPINF1, RNF112, TRPV1, NR1D1, …	upregulated
GO:0001525	angiogenesis	GO:BP	2.31e-06	601	120	ENSG00000066468, ENSG00000148848, ENSG00000151651, ENSG00000165757, ENSG00000099250, ENSG00000177283, ENSG00000128805, ENSG00000107731, ENSG00000150782, ENSG00000076706, ENSG00000154133, ENSG00000109854, ENSG00000110492, ENSG00000079337, ENSG00000161791, ENSG00000139567, ENSG00000149948, ENSG00000171860, ENSG00000011465, ENSG00000133639, ENSG00000102678, ENSG00000102755, ENSG00000102760, ENSG0000…	FGFR2, ADAM12, ADAM8, KIAA1462, NRP1, FZD8, ARHGAP22, UNC5B, IL18, MCAM, ROBO4, HTATIP2, MDK, RAPGEF3, FMNL3, ACVRL1, HMGA2, C3AR1, DCN, BTG1, FGF9, FLT1, RGCC, KLF5, MMP14, BMP4, TJP1, SLC12A6, THBS1, NOX5, ANPEP, ITGAX, MMP2, GPR56, SERPINF1, CCL2, PLXDC1, JUP, SPHK1, RNF213, CCBE1, PTPRM, MIR27A, MIR23A, CEACAM1, LRG1, C3, VAV3, SHC1, EFNA1, GLUL, PTGS2, CHI3L1, TGFB2, AGT, AKT3, COL8A2, TIE1,…	any
GO:0005737	cytoplasm	GO:CC	2.35e-06	11634	762	ENSG00000099204, ENSG00000198873, ENSG00000066468, ENSG00000019995, ENSG00000188385, ENSG00000151640, ENSG00000152463, ENSG00000148484, ENSG00000165996, ENSG00000078114, ENSG00000099246, ENSG00000095739, ENSG00000107968, ENSG00000170759, ENSG00000204176, ENSG00000198964, ENSG00000072422, ENSG00000122862, ENSG00000099282, ENSG00000122863, ENSG00000156026, ENSG00000151224, ENSG00000108219, ENSG0000…	ABLIM1, GRK5, FGFR2, ZRANB1, JAKMIP3, DPYSL4, OLAH, RSU1, PTPLA, NEBL, RAB18, BAMBI, MAP3K8, KIF5B, SYT15, SGMS1, RHOBTB1, SRGN, TSPAN15, CHST3, MCU, MAT1A, TSPAN14, LDB3, PAPSS2, ACTA2, ANKRD1, HECTD2, SLC35G1, TBC1D12, PIK3AP1, ANKRD2, HOGA1, MRVI1, RDX, HSPB2, CRYAB, IL18, PTS, GALNT18, TAGLN, PCSK7, TRIM29, SC5D, SORL1, UBASH3B, KIRREL3, RRAS2, DUSP8, HPS5, HTATIP2, ANO5, BDNF, CDKN1C, PAX6, …	downregulated
GO:0098772	molecular function regulator	GO:MF	2.52e-06	1838	293	ENSG00000107554, ENSG00000099250, ENSG00000128805, ENSG00000107984, ENSG00000107738, ENSG00000123243, ENSG00000108239, ENSG00000170276, ENSG00000150782, ENSG00000050165, ENSG00000176697, ENSG00000129757, ENSG00000110492, ENSG00000149131, ENSG00000110076, ENSG00000068831, ENSG00000068971, ENSG00000175315, ENSG00000174791, ENSG00000089250, ENSG00000013588, ENSG00000134548, ENSG00000170456, ENSG0000…	DNMBP, NRP1, ARHGAP22, DKK1, C10orf54, ITIH5, TBC1D12, HSPB2, IL18, DKK3, BDNF, CDKN1C, MDK, SERPING1, NRXN2, RASGRP2, PPP2R5B, CST6, RIN1, NOS1, GPRC5A, C12orf39, DENND5B, FGD4, PKP2, LRRK2, RAPGEF3, ERBB3, PLEKHG6, RAB3IP, AC025263.3, A2M, TNFSF13B, MCF2L, GAS6, FGF9, FRY, RGCC, FARP1, RIPK3, MBIP, SEC23A, BMP4, LGALS3, SERPINA1, LINC00984, SPINT1, SEMA6D, FGF7, RASGRF1, IL16, NMB, SEMA4B, GPRC…	any
GO:0051716	cellular response to stimulus	GO:BP	2.64e-06	7772	546	ENSG00000107554, ENSG00000065621, ENSG00000108018, ENSG00000138166, ENSG00000151892, ENSG00000151651, ENSG00000165757, ENSG00000099250, ENSG00000177283, ENSG00000165731, ENSG00000128805, ENSG00000107984, ENSG00000150347, ENSG00000122877, ENSG00000107731, ENSG00000122861, ENSG00000108175, ENSG00000187240, ENSG00000050165, ENSG00000023171, ENSG00000080854, ENSG00000130592, ENSG00000198168, ENSG0000…	DNMBP, GSTO2, SORCS1, DUSP5, GFRA1, ADAM8, KIAA1462, NRP1, FZD8, RET, ARHGAP22, DKK1, ARID5B, EGR2, UNC5B, PLAU, ZMIZ1, DYNC2H1, DKK3, GRAMD1B, IGSF9B, LSP1, SVIP, TSPAN32, FIBIN, IFITM2, IFITM1, IFITM3, DEPDC7, CD44, SIGIRR, SYT13, MDK, LRP4, HBE1, AC104389.28, HBG2, SYT7, LGALS12, FERMT3, NRXN2, LTBP3, FAM89B, FOSL1, CNIH2, RIN1, TPP1, DCHS1, DGAT2, CAPN5, PIDD, KLRC2, KLRC1, HVCN1, SH2B3, TAS2…	upregulated
GO:0022008	neurogenesis	GO:BP	2.71e-06	1679	155	ENSG00000066468, ENSG00000151640, ENSG00000170759, ENSG00000148677, ENSG00000137642, ENSG00000149571, ENSG00000110693, ENSG00000176697, ENSG00000007372, ENSG00000110047, ENSG00000068971, ENSG00000110195, ENSG00000087053, ENSG00000139767, ENSG00000135127, ENSG00000151490, ENSG00000018236, ENSG00000065361, ENSG00000155974, ENSG00000139304, ENSG00000074527, ENSG00000041515, ENSG00000183087, ENSG0000…	FGFR2, DPYSL4, KIF5B, ANKRD1, SORL1, KIRREL3, SOX6, BDNF, PAX6, EHD1, PPP2R5B, FOLR1, MTMR2, SRRM4, CCDC64, PTPRO, CNTN1, ERBB3, GRIP1, PTPRQ, NTN4, MYO16, GAS6, ATP8A2, WASF3, FRY, DCLK1, FARP1, MDGA2, BMP4, SPTB, MPP5, CLMN, GABRA5, GABRB3, NPTN, RASGRF1, SH3GL3, NR2F2, GPRC5B, NKD1, DOK4, PMP22, ULK2, SDK2, SLC9A3R1, MYH10, NTN1, CDH2, EPB41L3, PTPRM, ATCAY, DLL3, APOE, LRRC4B, CACNG7, RDH13, …	downregulated
GO:0005615	extracellular space	GO:CC	2.78e-06	3543	511	ENSG00000065621, ENSG00000120051, ENSG00000151892, ENSG00000187908, ENSG00000148484, ENSG00000107611, ENSG00000078114, ENSG00000099250, ENSG00000107984, ENSG00000165471, ENSG00000122862, ENSG00000122861, ENSG00000184719, ENSG00000107796, ENSG00000137745, ENSG00000187240, ENSG00000137710, ENSG00000149300, ENSG00000109846, ENSG00000150782, ENSG00000076706, ENSG00000050165, ENSG00000137642, ENSG0000…	GSTO2, CCDC147, GFRA1, DMBT1, RSU1, CUBN, NEBL, NRP1, DKK1, MBL2, SRGN, PLAU, RNLS, ACTA2, MMP13, DYNC2H1, RDX, C11orf52, CRYAB, IL18, MCAM, DKK3, SORL1, ROBO4, SLC37A2, ADAMTS15, RRAS2, LSP1, SVIP, BDNF, CD44, LRRC4C, CD82, HBE1, HBG2, SERPING1, SYT7, AHNAK, FERMT3, EHD1, DNHD1, LTBP3, CST6, TPP1, FOLR1, CAPN5, MTMR2, TXNRD1, GPRC5A, STX2, H2AFJ, MGP, PTPRO, C12orf39, LRRK2, CNTN1, SLC38A1, RAPG…	any
GO:0007267	cell-cell signaling	GO:BP	3.02e-06	1699	158	ENSG00000099250, ENSG00000177283, ENSG00000107984, ENSG00000122877, ENSG00000050165, ENSG00000080854, ENSG00000064201, ENSG00000148948, ENSG00000110492, ENSG00000134569, ENSG00000011347, ENSG00000110076, ENSG00000174871, ENSG00000174791, ENSG00000089250, ENSG00000060709, ENSG00000188906, ENSG00000079337, ENSG00000167779, ENSG00000185482, ENSG00000155980, ENSG00000149948, ENSG00000111052, ENSG0000…	NRP1, FZD8, DKK1, EGR2, DKK3, IGSF9B, TSPAN32, LRRC4C, MDK, LRP4, SYT7, NRXN2, CNIH2, RIN1, NOS1, RIMBP2, LRRK2, RAPGEF3, IGFBP6, STAC3, KIF5A, HMGA2, LIN7A, PPFIA2, GPC6, BEGAIN, GNG2, GPR68, SLC12A6, FGF7, SMAD3, CHRNA3, NMB, MCTP2, SSTR5, RAB26, PRRT2, STX1B, GPR56, PARD6A, ADORA2B, HIC1, CCL2, TRPV1, NR1D1, JUP, GFAP, MYCBPAP, SOX9, GRIN2C, FGF11, CD68, APCDD1, SERPINB3, GDF15, TSHZ3, PLEKHA4…	upregulated
GO:0099512	supramolecular fiber	GO:CC	3.15e-06	993	102	ENSG00000078114, ENSG00000170759, ENSG00000122367, ENSG00000107796, ENSG00000148677, ENSG00000165887, ENSG00000109846, ENSG00000139354, ENSG00000139112, ENSG00000057294, ENSG00000139116, ENSG00000196876, ENSG00000167767, ENSG00000170442, ENSG00000205426, ENSG00000196465, ENSG00000177425, ENSG00000197614, ENSG00000198033, ENSG00000102781, ENSG00000136167, ENSG00000165410, ENSG00000073712, ENSG0000…	NEBL, KIF5B, LDB3, ACTA2, ANKRD1, ANKRD2, CRYAB, GAS2L3, GABARAPL1, PKP2, KIF21A, SCN8A, KRT80, KRT86, KRT81, MYL6B, PAWR, MFAP5, TUBA3C, KATNAL1, LCP1, CFL2, FERMT2, ACTN1, ACTC1, TMOD2, TMOD3, MYZAP, TPM1, SYNM, COTL1, MYH8, MYH1, MYH2, MYH3, SPECC1, KRTAP2-3, KRT34, SKA2, MYH10, MYOM1, MYL12A, MYL12B, FHOD3, MYH14, CAMSAP3, COL11A1, DNM3, TNNT2, TNNI1, CSRP1, LMOD1, KIF17, CCSAP, DISC1, KIF26B…	downregulated
GO:0048667	cell morphogenesis involved in neuron differentiation	GO:BP	3.29e-06	611	121	ENSG00000151892, ENSG00000066468, ENSG00000170759, ENSG00000099250, ENSG00000165731, ENSG00000122877, ENSG00000138347, ENSG00000107731, ENSG00000154133, ENSG00000176697, ENSG00000007372, ENSG00000148948, ENSG00000134569, ENSG00000151490, ENSG00000188906, ENSG00000155980, ENSG00000139304, ENSG00000139220, ENSG00000074527, ENSG00000132932, ENSG00000133083, ENSG00000178235, ENSG00000184564, ENSG0000…	GFRA1, FGFR2, KIF5B, NRP1, RET, EGR2, MYPN, UNC5B, ROBO4, BDNF, PAX6, LRRC4C, LRP4, PTPRO, LRRK2, KIF5A, PTPRQ, PPFIA2, NTN4, ATP8A2, DCLK1, SLITRK1, SLITRK6, FARP1, SPTB, RPS6KA5, SEMA6D, NPTN, CHRNA3, SEMA4B, DOK4, TUBB3, TUBB3, ULK2, OMG, GRB7, SLC9A3R1, MYH10, NTN1, CDH2, PTPRM, APOE, SEMA6B, LRRC4B, NTNG1, CELSR2, AMIGO1, NGF, DRAXIN, CHRNB2, SHC1, EFNA1, TRIM46, DNM3, LHX9, DISC1, NEXN, LZT…	any
GO:0001503	ossification	GO:BP	3.36e-06	406	89	ENSG00000066468, ENSG00000107984, ENSG00000122877, ENSG00000122862, ENSG00000137745, ENSG00000133818, ENSG00000205213, ENSG00000185885, ENSG00000110492, ENSG00000134569, ENSG00000168056, ENSG00000166341, ENSG00000162337, ENSG00000111341, ENSG00000166886, ENSG00000070961, ENSG00000102678, ENSG00000157227, ENSG00000125378, ENSG00000198732, ENSG00000166949, ENSG00000087245, ENSG00000183688, ENSG0000…	FGFR2, DKK1, EGR2, SRGN, MMP13, RRAS2, LGR4, IFITM1, MDK, LRP4, LTBP3, DCHS1, LRP5, MGP, NAB2, ATP2B1, FGF9, MMP14, BMP4, SMOC1, SMAD3, MMP2, FAM101B, AXIN2, SOX9, TWSG1, ACP5, JUNB, TGFB1, FSTL3, COL11A1, SORT1, CSF1, TUFT1, THBS3, BGLAP, PBX1, PTGS2, TGFB2, CYR61, GDF5, BMP2, COL6A1, KREMEN1, GLI2, NAB1, SATB2, SLC8A1, WWTR1, IGSF10, TP63, CLEC3B, PTH1R, WNT5A, FAT4, INTU, CCRN4L, SMAD1, FGFR3,…	any
GO:0098590	plasma membrane region	GO:CC	3.46e-06	1153	114	ENSG00000137710, ENSG00000109846, ENSG00000182985, ENSG00000149403, ENSG00000068831, ENSG00000110047, ENSG00000174669, ENSG00000110195, ENSG00000087053, ENSG00000149972, ENSG00000139112, ENSG00000111450, ENSG00000151490, ENSG00000018236, ENSG00000065361, ENSG00000155974, ENSG00000136167, ENSG00000102468, ENSG00000118946, ENSG00000178695, ENSG00000152767, ENSG00000155465, ENSG00000073712, ENSG0000…	RDX, CRYAB, CADM1, GRIK4, RASGRP2, EHD1, SLC29A2, FOLR1, MTMR2, CNTN5, GABARAPL1, STX2, PTPRO, CNTN1, ERBB3, GRIP1, LCP1, HTR2A, PCDH17, KCTD12, FARP1, SLC7A7, FERMT2, AKAP5, MPP5, GABRA5, GABRB3, TJP1, TPM1, NPTN, SHISA9, ABCC6, GSG1L, SLC7A5, MPP2, RGS9, CACNG4, SLC9A3R1, MYH10, CDH2, DSG2, EPB41L3, ALPK2, OLFM2, HMHA1, LIN7B, LRRC4B, CACNG7, PALM, PDPN, PIP5K1A, ATP1B1, DNM3, ADORA1, KISS1, KI…	downregulated
GO:0048589	developmental growth	GO:BP	3.48e-06	698	134	ENSG00000066468, ENSG00000099250, ENSG00000165471, ENSG00000150347, ENSG00000108175, ENSG00000095587, ENSG00000137745, ENSG00000176697, ENSG00000110492, ENSG00000134569, ENSG00000139318, ENSG00000150457, ENSG00000102678, ENSG00000132932, ENSG00000133083, ENSG00000133110, ENSG00000102554, ENSG00000178235, ENSG00000184564, ENSG00000125378, ENSG00000185650, ENSG00000100600, ENSG00000248905, ENSG0000…	FGFR2, NRP1, MBL2, ARID5B, ZMIZ1, TLL2, MMP13, BDNF, MDK, LRP4, DUSP6, LATS2, FGF9, ATP8A2, DCLK1, POSTN, KLF5, SLITRK1, SLITRK6, BMP4, ZFP36L1, LGMN, FMN1, SEMA6D, FGF7, SMAD3, SEMA4B, NKD1, ULK2, STAT5A, SOX9, NTN1, MIR23A, GDF15, TGFB1, APOE, SEMA6B, CACNG7, CSF1, NGF, PTGFRN, DRAXIN, VWA1, TRIM46, THBS3, RGS4, RGS2, SYT2, KCNK2, TGFB2, AGT, DISC1, KIF26B, TP73, GDF5, SALL4, COL6A1, COL6A2, RT…	any
GO:0099572	postsynaptic specialization	GO:CC	3.61e-06	370	81	ENSG00000122862, ENSG00000109846, ENSG00000149403, ENSG00000080854, ENSG00000148948, ENSG00000134569, ENSG00000174871, ENSG00000087053, ENSG00000089250, ENSG00000151490, ENSG00000155974, ENSG00000111052, ENSG00000133083, ENSG00000178235, ENSG00000179841, ENSG00000186297, ENSG00000156642, ENSG00000205363, ENSG00000080644, ENSG00000136379, ENSG00000140600, ENSG00000237515, ENSG00000169181, ENSG0000…	SRGN, CRYAB, GRIK4, IGSF9B, LRRC4C, LRP4, CNIH2, MTMR2, NOS1, PTPRO, GRIP1, LIN7A, DCLK1, SLITRK1, AKAP5, GABRA5, NPTN, C15orf59, CHRNA3, ABHD17C, SH3GL3, SHISA9, GSG1L, PRRT2, RNF112, MPP2, RGS9, CACNG4, GRIN2C, CDH2, EPB41L3, LIN7B, LRRC4B, CACNG7, PALM, CHRNB2, DNM3, ADORA1, DISC1, ACTN2, CHRM3, EPB41, KCNAB2, DNAJC6, PDE4B, CNN3, LZTS3, MX1, P2RX6, BCR, NEFH, MAPK8IP2, PKP4, MAP2, ERBB4, SYN2…	any
GO:0008307	structural constituent of muscle	GO:MF	3.95e-06	43	15	ENSG00000078114, ENSG00000165887, ENSG00000196465, ENSG00000092841, ENSG00000140416, ENSG00000182253, ENSG00000133020, ENSG00000101605, ENSG00000159176, ENSG00000162614, ENSG00000101335, ENSG00000168530, ENSG00000154556, ENSG00000104369, ENSG00000198467	NEBL, ANKRD2, MYL6B, MYL6, TPM1, SYNM, MYH8, MYOM1, CSRP1, NEXN, MYL9, MYL1, SORBS2, JPH1, TPM2	downregulated
GO:0016459	myosin complex	GO:CC	4.16e-06	57	17	ENSG00000196465, ENSG00000092841, ENSG00000041515, ENSG00000128849, ENSG00000133020, ENSG00000109061, ENSG00000125414, ENSG00000109063, ENSG00000133026, ENSG00000101608, ENSG00000118680, ENSG00000105357, ENSG00000143375, ENSG00000101335, ENSG00000169994, ENSG00000168530, ENSG00000064042	MYL6B, MYL6, MYO16, CGNL1, MYH8, MYH1, MYH2, MYH3, MYH10, MYL12A, MYL12B, MYH14, CGN, MYL9, MYO7B, MYL1, LIMCH1	downregulated
GO:0045595	regulation of cell differentiation	GO:BP	4.35e-06	1932	174	ENSG00000151651, ENSG00000148803, ENSG00000099250, ENSG00000165731, ENSG00000107984, ENSG00000108175, ENSG00000185885, ENSG00000148948, ENSG00000110492, ENSG00000134569, ENSG00000133317, ENSG00000133321, ENSG00000168056, ENSG00000089250, ENSG00000123095, ENSG00000188906, ENSG00000186897, ENSG00000139567, ENSG00000135426, ENSG00000135407, ENSG00000139220, ENSG00000133639, ENSG00000133110, ENSG0000…	ADAM8, FUOM, NRP1, RET, DKK1, ZMIZ1, IFITM1, LRRC4C, MDK, LRP4, LGALS12, RARRES3, LTBP3, NOS1, BHLHE41, LRRK2, C1QL4, ACVRL1, TESPA1, AVIL, PPFIA2, BTG1, POSTN, RGCC, EDNRB, SLITRK1, MMP14, LGALS3, ZFP36L1, SMOC1, FOS, GPR68, SPINT1, SEMA6D, SMAD3, CHRNA3, SEMA4B, STX1B, IRX3, GPR56, HSF4, SCARF1, SERPINF1, RNF112, LGALS9, OMG, EVI2B, TRPV1, NR1D1, GFAP, HOXB4, MMD, SOX9, HES7, SIGLEC15, SERPINB3…	upregulated
GO:0045597	positive regulation of cell differentiation	GO:BP	4.36e-06	1022	107	ENSG00000151651, ENSG00000099250, ENSG00000165731, ENSG00000107984, ENSG00000108175, ENSG00000185885, ENSG00000110492, ENSG00000133321, ENSG00000168056, ENSG00000139567, ENSG00000135426, ENSG00000135407, ENSG00000133639, ENSG00000102760, ENSG00000178235, ENSG00000157227, ENSG00000185650, ENSG00000170345, ENSG00000119714, ENSG00000166145, ENSG00000166949, ENSG00000177508, ENSG00000102878, ENSG0000…	ADAM8, NRP1, RET, DKK1, ZMIZ1, IFITM1, MDK, RARRES3, LTBP3, ACVRL1, TESPA1, AVIL, BTG1, RGCC, SLITRK1, MMP14, ZFP36L1, FOS, GPR68, SPINT1, SMAD3, IRX3, HSF4, SCARF1, SERPINF1, RNF112, LGALS9, EVI2B, GFAP, HOXB4, MMD, SOX9, SERPINB3, JUNB, GDF15, ZFP36, TGFB1, CEACAM1, FLT3LG, CSF1, TNFRSF1B, TNFSF4, PTGS2, RGS2, PTPRC, SYT2, WNT9A, TP73, IL23R, CYR61, RIN2, GDF5, ADA, PREX1, NFATC2, BMP2, FRZB, F…	upregulated
GO:0051049	regulation of transport	GO:BP	4.5e-06	1947	175	ENSG00000151651, ENSG00000099250, ENSG00000107984, ENSG00000165471, ENSG00000198168, ENSG00000019505, ENSG00000110492, ENSG00000011347, ENSG00000124942, ENSG00000174871, ENSG00000122986, ENSG00000111335, ENSG00000089250, ENSG00000151062, ENSG00000188906, ENSG00000079337, ENSG00000185482, ENSG00000139220, ENSG00000070961, ENSG00000133110, ENSG00000102760, ENSG00000136160, ENSG00000134873, ENSG0000…	ADAM8, NRP1, DKK1, MBL2, SVIP, SYT13, MDK, SYT7, AHNAK, CNIH2, HVCN1, OAS2, NOS1, CACNA2D4, LRRK2, RAPGEF3, STAC3, PPFIA2, ATP2B1, POSTN, RGCC, EDNRB, CLDN10, LGALS3, GPR68, IFI27, SMAD3, CHRNA3, NMB, MCTP2, SSTR5, MPV17L, RAB26, PRRT2, CORO1A, STX1B, PYCARD, RRAD, PARD6A, ATP2C2, ADORA2B, LGALS9, CCL2, TRPV3, TRPV1, NR1D1, JUP, WNK4, GFAP, SEPT4, SPHK1, KCNAB3, RAB27B, PMAIP1, MIR27A, EMR2, CYP4…	upregulated
GO:0005887	integral component of plasma membrane	GO:CC	4.53e-06	1624	148	ENSG00000203805, ENSG00000066468, ENSG00000204174, ENSG00000198964, ENSG00000099282, ENSG00000108219, ENSG00000152779, ENSG00000149403, ENSG00000137642, ENSG00000205213, ENSG00000174669, ENSG00000151490, ENSG00000111371, ENSG00000196876, ENSG00000065361, ENSG00000102755, ENSG00000133083, ENSG00000102468, ENSG00000118946, ENSG00000155465, ENSG00000140030, ENSG00000186297, ENSG00000166206, ENSG0000…	PPAPDC1A, FGFR2, NPY4R, SGMS1, TSPAN15, TSPAN14, SLC16A12, GRIK4, SORL1, LGR4, SLC29A2, PTPRO, SLC38A1, SCN8A, ERBB3, FLT1, DCLK1, HTR2A, PCDH17, SLC7A7, GPR65, GABRA5, GABRB3, NPTN, TSPAN3, TMC3, IGF1R, SHISA9, GSG1L, MMP15, ITGAE, CACNG4, CDH2, PTPRM, OLFM2, FUT1, LRRC4B, CACNG7, GP6, KIAA1324, AMIGO1, SLC16A4, TSPAN2, PDPN, MPZL1, ATP1B1, NCF2, ADORA1, HTR1D, OPN3, ABCA4, MMP24, LRRN4, TRPM2, …	downregulated
GO:0010769	regulation of cell morphogenesis involved in differentiation	GO:BP	4.71e-06	311	73	ENSG00000099250, ENSG00000165731, ENSG00000176697, ENSG00000148948, ENSG00000110492, ENSG00000134569, ENSG00000151490, ENSG00000188906, ENSG00000139220, ENSG00000133110, ENSG00000178235, ENSG00000137872, ENSG00000080644, ENSG00000185033, ENSG00000083290, ENSG00000126861, ENSG00000092929, ENSG00000065320, ENSG00000170558, ENSG00000130203, ENSG00000167680, ENSG00000131409, ENSG00000181754, ENSG0000…	NRP1, RET, BDNF, LRRC4C, MDK, LRP4, PTPRO, LRRK2, PPFIA2, POSTN, SLITRK1, SEMA6D, CHRNA3, SEMA4B, ULK2, OMG, UNC13D, NTN1, CDH2, APOE, SEMA6B, LRRC4B, AMIGO1, NGF, DRAXIN, PDPN, CHRNB2, EFNA1, TRIM46, DNM3, DISC1, GBP1, LZTS3, PREX1, RTN4R, LIMS2, CHN1, MAP2, FN1, NGEF, KIF1A, KALRN, CSPG5, SEMA3B, WNT5A, ROBO2, PPP3CA, FGB, FGG, SPP1, NEDD9, TUBB2B, SYNGAP1, VEGFA, BAI3, RELN, NRCAM, PLXNA4, HEC…	any
GO:0005615	extracellular space	GO:CC	5.02e-06	3543	278	ENSG00000065621, ENSG00000151892, ENSG00000187908, ENSG00000107611, ENSG00000099250, ENSG00000107984, ENSG00000165471, ENSG00000122861, ENSG00000184719, ENSG00000137745, ENSG00000187240, ENSG00000050165, ENSG00000154133, ENSG00000134955, ENSG00000130592, ENSG00000198168, ENSG00000026508, ENSG00000148948, ENSG00000085117, ENSG00000213931, ENSG00000196565, ENSG00000149131, ENSG00000011347, ENSG0000…	GSTO2, GFRA1, DMBT1, CUBN, NRP1, DKK1, MBL2, PLAU, RNLS, MMP13, DYNC2H1, DKK3, ROBO4, SLC37A2, LSP1, SVIP, CD44, LRRC4C, CD82, HBE1, HBG2, SERPING1, SYT7, AHNAK, FERMT3, DNHD1, LTBP3, TPP1, CAPN5, GPRC5A, H2AFJ, LRRK2, RAPGEF3, C1QL4, KRT75, IGFBP6, ITGB7, LRIG3, SCNN1A, C1S, TSPAN8, C1RL, RBP5, LIN7A, PPFIA2, RASSF9, GALNT4, ATP2B1, DCN, A2M, TNFSF13B, MCF2L, POSTN, GPC6, MMP14, GNG2, LGALS3, LT…	upregulated
GO:0061061	muscle structure development	GO:BP	5.68e-06	683	131	ENSG00000066468, ENSG00000148848, ENSG00000078114, ENSG00000107984, ENSG00000150347, ENSG00000122877, ENSG00000138347, ENSG00000122367, ENSG00000148677, ENSG00000095587, ENSG00000165887, ENSG00000109846, ENSG00000150782, ENSG00000149591, ENSG00000110693, ENSG00000176697, ENSG00000110047, ENSG00000089250, ENSG00000123095, ENSG00000057294, ENSG00000135424, ENSG00000065361, ENSG00000196465, ENSG0000…	FGFR2, ADAM12, NEBL, DKK1, ARID5B, EGR2, MYPN, LDB3, ANKRD1, TLL2, ANKRD2, CRYAB, IL18, TAGLN, SOX6, BDNF, EHD1, NOS1, BHLHE41, PKP2, ITGA7, ERBB3, MYL6B, MYL6, STAC3, DCN, BTG1, FGF9, KLF5, EDNRB, MMP14, CFL2, BMP4, ZFP36L1, FOS, ACTC1, TMOD2, TMOD3, TPM1, SMAD3, ALPK3, NR2F2, NUPR1, NKD1, MYH3, SOX9, MYH10, CDH2, MYOM1, FHOD3, ALPK2, OLFM2, MIR23A, GDF15, TGFB1, FLT3LG, MYH14, COL11A1, SORT1, P…	any
GO:0023014	signal transduction by protein phosphorylation	GO:BP	5.94e-06	958	171	ENSG00000138166, ENSG00000151892, ENSG00000066468, ENSG00000151651, ENSG00000165757, ENSG00000107968, ENSG00000099250, ENSG00000177283, ENSG00000165731, ENSG00000107984, ENSG00000109846, ENSG00000150782, ENSG00000137642, ENSG00000184545, ENSG00000026508, ENSG00000111252, ENSG00000111266, ENSG00000188906, ENSG00000186897, ENSG00000065361, ENSG00000153233, ENSG00000139318, ENSG00000183087, ENSG0000…	DUSP5, GFRA1, FGFR2, ADAM8, KIAA1462, MAP3K8, NRP1, FZD8, RET, DKK1, CRYAB, IL18, SORL1, DUSP8, CD44, SH2B3, DUSP16, LRRK2, C1QL4, ERBB3, PTPRR, DUSP6, GAS6, FGF9, TNFRSF19, FLT1, HTR2A, NDRG2, AJUBA, MBIP, BMP4, SPTB, ZFP36L1, THBS1, FGF7, TNFAIP8L3, NPTN, RASGRF1, IGF1R, LAT, PYCARD, DOK4, MARVELD3, ADORA2B, LGALS9, CCL2, DUSP3, SOX9, SLC9A3R1, SPHK1, CDH2, GAREM, MAPK4, SERPINB3, MIR27A, MIR23…	any
GO:0016020	membrane	GO:CC	6.17e-06	9731	653	ENSG00000099194, ENSG00000108018, ENSG00000197142, ENSG00000151892, ENSG00000187908, ENSG00000182022, ENSG00000151651, ENSG00000107611, ENSG00000204740, ENSG00000120594, ENSG00000165757, ENSG00000099250, ENSG00000177283, ENSG00000165731, ENSG00000170324, ENSG00000107984, ENSG00000138347, ENSG00000107731, ENSG00000122861, ENSG00000187240, ENSG00000185742, ENSG00000166250, ENSG00000023171, ENSG0000…	SCD, SORCS1, ACSL5, GFRA1, DMBT1, CHST15, ADAM8, CUBN, MALRD1, PLXDC2, KIAA1462, NRP1, FZD8, RET, FRMPD2, DKK1, MYPN, UNC5B, PLAU, DYNC2H1, C11orf87, CLMP, GRAMD1B, ESAM, ROBO4, SLC37A2, IGSF9B, LSP1, SVIP, TSPAN32, IFITM2, IFITM1, IFITM3, KIAA1549L, CD44, LRRC4C, SIGIRR, CD82, SYT13, LRP4, AC104389.28, ZP1, SYT7, MYRF, AHNAK, ROM1, RARRES3, FERMT3, NRXN2, FOSL1, CNIH2, RIN1, DCHS1, DGAT2, KLRC4,…	upregulated
GO:0048699	generation of neurons	GO:BP	6.57e-06	1574	146	ENSG00000066468, ENSG00000151640, ENSG00000170759, ENSG00000148677, ENSG00000137642, ENSG00000149571, ENSG00000176697, ENSG00000007372, ENSG00000110047, ENSG00000068971, ENSG00000110195, ENSG00000087053, ENSG00000139767, ENSG00000135127, ENSG00000151490, ENSG00000018236, ENSG00000155974, ENSG00000139304, ENSG00000074527, ENSG00000041515, ENSG00000183087, ENSG00000132932, ENSG00000073910, ENSG0000…	FGFR2, DPYSL4, KIF5B, ANKRD1, SORL1, KIRREL3, BDNF, PAX6, EHD1, PPP2R5B, FOLR1, MTMR2, SRRM4, CCDC64, PTPRO, CNTN1, GRIP1, PTPRQ, NTN4, MYO16, GAS6, ATP8A2, FRY, DCLK1, FARP1, MDGA2, BMP4, SPTB, CLMN, GABRA5, GABRB3, NPTN, RASGRF1, SH3GL3, NR2F2, GPRC5B, NKD1, DOK4, PMP22, ULK2, SDK2, SLC9A3R1, MYH10, NTN1, CDH2, EPB41L3, PTPRM, ATCAY, DLL3, APOE, LRRC4B, CACNG7, RDH13, CAMSAP3, CELSR2, AMIGO1, T…	downregulated
GO:0097708	intracellular vesicle	GO:CC	6.62e-06	2375	359	ENSG00000151892, ENSG00000066468, ENSG00000187908, ENSG00000151651, ENSG00000107611, ENSG00000204740, ENSG00000099246, ENSG00000170759, ENSG00000099250, ENSG00000165731, ENSG00000204176, ENSG00000107984, ENSG00000072422, ENSG00000122862, ENSG00000099282, ENSG00000122861, ENSG00000108219, ENSG00000108239, ENSG00000133805, ENSG00000137642, ENSG00000149571, ENSG00000198168, ENSG00000176697, ENSG0000…	GFRA1, FGFR2, DMBT1, ADAM8, CUBN, MALRD1, RAB18, KIF5B, NRP1, RET, SYT15, DKK1, RHOBTB1, SRGN, TSPAN15, PLAU, TSPAN14, TBC1D12, AMPD3, SORL1, KIRREL3, SVIP, BDNF, IFITM3, CD44, SYT13, OR51E2, SERPING1, SYT7, FERMT3, EHD1, CNIH2, TPP1, FOLR1, MTMR2, GABARAPL1, HVCN1, DUSP16, GPRC5A, STX2, C12orf39, LRMP, REP15, LRRK2, SMAGP, SCN8A, HSD17B6, LRIG3, SCNN1A, GRIP1, PHLDA1, C3AR1, RASSF9, A2M, GAS6, A…	any
GO:0014069	postsynaptic density	GO:CC	6.81e-06	344	76	ENSG00000109846, ENSG00000149403, ENSG00000080854, ENSG00000148948, ENSG00000134569, ENSG00000174871, ENSG00000087053, ENSG00000089250, ENSG00000151490, ENSG00000155974, ENSG00000111052, ENSG00000133083, ENSG00000178235, ENSG00000179841, ENSG00000156642, ENSG00000205363, ENSG00000080644, ENSG00000136379, ENSG00000140600, ENSG00000237515, ENSG00000169181, ENSG00000167371, ENSG00000128482, ENSG0000…	CRYAB, GRIK4, IGSF9B, LRRC4C, LRP4, CNIH2, MTMR2, NOS1, PTPRO, GRIP1, LIN7A, DCLK1, SLITRK1, AKAP5, NPTN, C15orf59, CHRNA3, ABHD17C, SH3GL3, SHISA9, GSG1L, PRRT2, RNF112, MPP2, RGS9, CACNG4, GRIN2C, CDH2, EPB41L3, LIN7B, LRRC4B, CACNG7, PALM, DNM3, ADORA1, DISC1, ACTN2, CHRM3, EPB41, KCNAB2, DNAJC6, PDE4B, CNN3, LZTS3, MX1, P2RX6, BCR, NEFH, MAPK8IP2, PKP4, MAP2, ERBB4, SYN2, TMEM108, P2RY1, ADRA…	any
GO:0030182	neuron differentiation	GO:BP	6.93e-06	1409	134	ENSG00000066468, ENSG00000151640, ENSG00000170759, ENSG00000148677, ENSG00000149571, ENSG00000176697, ENSG00000007372, ENSG00000110047, ENSG00000068971, ENSG00000110195, ENSG00000087053, ENSG00000139767, ENSG00000135127, ENSG00000151490, ENSG00000018236, ENSG00000155974, ENSG00000139304, ENSG00000074527, ENSG00000041515, ENSG00000132932, ENSG00000073910, ENSG00000133083, ENSG00000152767, ENSG0000…	FGFR2, DPYSL4, KIF5B, ANKRD1, KIRREL3, BDNF, PAX6, EHD1, PPP2R5B, FOLR1, MTMR2, SRRM4, CCDC64, PTPRO, CNTN1, GRIP1, PTPRQ, NTN4, MYO16, ATP8A2, FRY, DCLK1, FARP1, MDGA2, BMP4, SPTB, CLMN, GABRA5, GABRB3, NPTN, RASGRF1, SH3GL3, GPRC5B, NKD1, DOK4, PMP22, ULK2, SDK2, SLC9A3R1, MYH10, NTN1, CDH2, EPB41L3, PTPRM, ATCAY, APOE, LRRC4B, CACNG7, RDH13, CAMSAP3, CELSR2, AMIGO1, TSPAN2, NGF, PHGDH, EFNA1, …	downregulated
GO:0070161	anchoring junction	GO:CC	7.05e-06	785	143	ENSG00000107554, ENSG00000148484, ENSG00000150054, ENSG00000165757, ENSG00000099250, ENSG00000170324, ENSG00000128805, ENSG00000122861, ENSG00000137710, ENSG00000204381, ENSG00000182985, ENSG00000076706, ENSG00000166250, ENSG00000149564, ENSG00000133818, ENSG00000026508, ENSG00000184363, ENSG00000124942, ENSG00000149260, ENSG00000057294, ENSG00000139626, ENSG00000111052, ENSG00000102755, ENSG0000…	DNMBP, RSU1, MPP7, KIAA1462, NRP1, FRMPD2, ARHGAP22, PLAU, RDX, LAYN, CADM1, MCAM, CLMP, ESAM, RRAS2, CD44, PKP3, AHNAK, CAPN5, PKP2, ITGB7, LIN7A, FLT1, LCP1, PCDH9, CLDN10, MMP14, AJUBA, FERMT2, MPP5, ACTN1, TJP1, FMN1, ACTC1, CGNL1, SYNM, LAT, CORO1A, PPL, FHOD1, PARD6A, MARVELD3, MYH1, MYH2, PMP22, PLXDC1, GRB7, JUP, WNK4, CDH2, DSG2, EPB41L3, PTPRM, CNN1, WTIP, CEACAM1, PVR, LIN7B, CAMSAP3, …	any
GO:0048858	cell projection morphogenesis	GO:BP	8.02e-06	691	79	ENSG00000066468, ENSG00000151640, ENSG00000170759, ENSG00000149571, ENSG00000176697, ENSG00000007372, ENSG00000151490, ENSG00000155974, ENSG00000074527, ENSG00000041515, ENSG00000132932, ENSG00000133083, ENSG00000152767, ENSG00000070182, ENSG00000156642, ENSG00000125170, ENSG00000083290, ENSG00000133026, ENSG00000065320, ENSG00000170558, ENSG00000082397, ENSG00000173482, ENSG00000130203, ENSG0000…	FGFR2, DPYSL4, KIF5B, KIRREL3, BDNF, PAX6, PTPRO, GRIP1, NTN4, MYO16, ATP8A2, DCLK1, FARP1, SPTB, NPTN, DOK4, ULK2, MYH10, NTN1, CDH2, EPB41L3, PTPRM, APOE, LRRC4B, CACNG7, CELSR2, AMIGO1, NGF, PDPN, EFNA1, DNM3, DISC1, NEXN, LZTS3, PARD6B, DOK5, RTN4R, NEFH, MAPK8IP2, GLI2, LRP2, CHN1, MAP2, NYAP2, NGEF, KIF1A, NRXN1, KALRN, TMEM108, CNTN4, CSPG5, CELSR3, SEMA3B, WNT5A, ROBO2, SNX2, PDLIM7, EMB,…	downregulated
GO:0010646	regulation of cell communication	GO:BP	8.03e-06	3638	288	ENSG00000107554, ENSG00000138166, ENSG00000151651, ENSG00000165757, ENSG00000099250, ENSG00000177283, ENSG00000165731, ENSG00000128805, ENSG00000107984, ENSG00000122877, ENSG00000107731, ENSG00000122861, ENSG00000108175, ENSG00000187240, ENSG00000050165, ENSG00000080854, ENSG00000121690, ENSG00000026508, ENSG00000148948, ENSG00000185187, ENSG00000110492, ENSG00000134569, ENSG00000011347, ENSG0000…	DNMBP, DUSP5, ADAM8, KIAA1462, NRP1, FZD8, RET, ARHGAP22, DKK1, EGR2, UNC5B, PLAU, ZMIZ1, DYNC2H1, DKK3, IGSF9B, DEPDC7, CD44, LRRC4C, SIGIRR, MDK, LRP4, SYT7, FAM89B, CNIH2, RIN1, PIDD, SH2B3, NOS1, GPRC5A, LRRK2, RAPGEF3, C1QL4, ACVRL1, IGFBP6, TESPA1, PLEKHG6, PPFIA2, DUSP6, DCN, A2M, MCF2L, TNFRSF19, POSTN, LPAR6, GPC6, GPR18, BEGAIN, MMP14, RIPK3, LGALS3, GPR68, BDKRB2, FGF7, TNFAIP8L3, DYX1…	upregulated
GO:0005102	signaling receptor binding	GO:MF	8.08e-06	1638	151	ENSG00000151892, ENSG00000177283, ENSG00000107984, ENSG00000165471, ENSG00000050165, ENSG00000110492, ENSG00000134569, ENSG00000149781, ENSG00000110076, ENSG00000177595, ENSG00000111252, ENSG00000135114, ENSG00000167779, ENSG00000139626, ENSG00000135426, ENSG00000127324, ENSG00000175899, ENSG00000102524, ENSG00000136160, ENSG00000157227, ENSG00000131981, ENSG00000168398, ENSG00000137872, ENSG0000…	GFRA1, FZD8, DKK1, MBL2, DKK3, MDK, LRP4, FERMT3, NRXN2, PIDD, SH2B3, OASL, IGFBP6, ITGB7, TESPA1, TSPAN8, A2M, TNFSF13B, EDNRB, MMP14, LGALS3, BDKRB2, SEMA6D, SHC4, FGF7, DYX1C1, SMAD3, NMB, SEMA4B, STX1B, PYCARD, ITGAX, TUBB3, CCL2, KRT17, JUP, GFAP, ACE, FGF11, TNFSF13, SECTM1, GDF15, CRLF1, CD22, MIA, TGFB1, LRG1, SEMA6B, FLT3LG, C3, VCAM1, VAV3, CSF1, S100A4, SHC1, TNFSF18, TNFSF4, PTPRC, LA…	upregulated
GO:0031410	cytoplasmic vesicle	GO:CC	8.27e-06	2372	358	ENSG00000151892, ENSG00000066468, ENSG00000187908, ENSG00000151651, ENSG00000107611, ENSG00000204740, ENSG00000099246, ENSG00000170759, ENSG00000099250, ENSG00000165731, ENSG00000204176, ENSG00000107984, ENSG00000072422, ENSG00000122862, ENSG00000099282, ENSG00000122861, ENSG00000108219, ENSG00000108239, ENSG00000133805, ENSG00000137642, ENSG00000149571, ENSG00000198168, ENSG00000176697, ENSG0000…	GFRA1, FGFR2, DMBT1, ADAM8, CUBN, MALRD1, RAB18, KIF5B, NRP1, RET, SYT15, DKK1, RHOBTB1, SRGN, TSPAN15, PLAU, TSPAN14, TBC1D12, AMPD3, SORL1, KIRREL3, SVIP, BDNF, IFITM3, CD44, SYT13, OR51E2, SERPING1, SYT7, FERMT3, EHD1, CNIH2, TPP1, FOLR1, MTMR2, GABARAPL1, HVCN1, DUSP16, GPRC5A, STX2, C12orf39, LRMP, REP15, LRRK2, SMAGP, SCN8A, HSD17B6, LRIG3, SCNN1A, GRIP1, PHLDA1, C3AR1, RASSF9, A2M, GAS6, A…	any
GO:0034330	cell junction organization	GO:BP	8.42e-06	297	70	ENSG00000150054, ENSG00000099250, ENSG00000170324, ENSG00000137710, ENSG00000182985, ENSG00000149564, ENSG00000184363, ENSG00000151490, ENSG00000123094, ENSG00000057294, ENSG00000139567, ENSG00000157227, ENSG00000129474, ENSG00000073712, ENSG00000072415, ENSG00000072110, ENSG00000104067, ENSG00000248905, ENSG00000137801, ENSG00000166949, ENSG00000102981, ENSG00000140832, ENSG00000173801, ENSG0000…	MPP7, NRP1, FRMPD2, RDX, CADM1, ESAM, PKP3, PTPRO, RASSF8, PKP2, ACVRL1, MMP14, AJUBA, FERMT2, MPP5, ACTN1, TJP1, FMN1, THBS1, SMAD3, PARD6A, MARVELD3, JUP, DUSP3, VMP1, ACE, SDK2, CDH2, DSG2, EPB41L3, PVR, CAMSAP3, PIP5K1A, RAB13, C1orf106, LAMB3, TGFB2, AGT, ACTN2, COL16A1, PARD6B, BCR, GRHL1, MAP4K4, EPB41L5, LIMS2, PKP4, XIRP2, FN1, CLDN1, APOD, LIMCH1, CSF1R, CDH18, CDH12, CDH10, CDH9, CDH6,…	any
GO:0010810	regulation of cell-substrate adhesion	GO:BP	8.49e-06	216	56	ENSG00000148484, ENSG00000099250, ENSG00000122861, ENSG00000110492, ENSG00000151490, ENSG00000139567, ENSG00000133110, ENSG00000157227, ENSG00000248905, ENSG00000137801, ENSG00000166949, ENSG00000173801, ENSG00000108861, ENSG00000092929, ENSG00000076826, ENSG00000184371, ENSG00000162493, ENSG00000162946, ENSG00000116962, ENSG00000084636, ENSG00000142871, ENSG00000117228, ENSG00000132669, ENSG0000…	RSU1, NRP1, PLAU, MDK, PTPRO, ACVRL1, POSTN, MMP14, FMN1, THBS1, SMAD3, JUP, DUSP3, UNC13D, CAMSAP3, CSF1, PDPN, DISC1, NID1, COL16A1, CYR61, GBP1, RIN2, PREX1, RAC2, MAP4K4, EPB41L5, LIMS2, FN1, EMILIN1, ABI3BP, BCL6, APOD, CSPG5, FGB, FGG, LIMCH1, SPOCK1, CCL28, EDIL3, NEDD9, VEGFA, SERPINE1, AGR2, SEMA3E, CDK6, HAS2, DLC1, DOCK5, ANGPT2, NOTCH1, TEK, KANK1, JAK2, ECM2, ARHGAP6	any
GO:0043085	positive regulation of catalytic activity	GO:BP	8.58e-06	1466	241	ENSG00000138166, ENSG00000066468, ENSG00000151651, ENSG00000148484, ENSG00000107968, ENSG00000099250, ENSG00000177283, ENSG00000165731, ENSG00000128805, ENSG00000107984, ENSG00000107738, ENSG00000108239, ENSG00000170276, ENSG00000150782, ENSG00000137642, ENSG00000259571, ENSG00000176697, ENSG00000026508, ENSG00000133321, ENSG00000068831, ENSG00000174791, ENSG00000177595, ENSG00000089250, ENSG0000…	DUSP5, FGFR2, ADAM8, RSU1, MAP3K8, NRP1, FZD8, RET, ARHGAP22, DKK1, C10orf54, TBC1D12, HSPB2, IL18, SORL1, BLID, BDNF, CD44, RARRES3, RASGRP2, RIN1, PIDD, NOS1, GPRC5A, LRRK2, RAPGEF3, ERBB3, NAB2, PPM1H, PLEKHG6, HMGA2, DUSP6, GAS6, FLT1, RGCC, HTR2A, AJUBA, RIPK3, SEC23A, BMP4, GCH1, AKAP5, GPR65, LGMN, THBS1, PLCB2, TNFAIP8L3, TPM1, SMAD3, CHRNA3, RASGRF1, IGF1R, GPRC5B, NUPR1, LAT, PYCARD, AR…	any
GO:0005581	collagen trimer	GO:CC	8.76e-06	97	22	ENSG00000165471, ENSG00000137745, ENSG00000186897, ENSG00000011465, ENSG00000186417, ENSG00000132205, ENSG00000158270, ENSG00000171812, ENSG00000142156, ENSG00000142173, ENSG00000186998, ENSG00000133466, ENSG00000163359, ENSG00000138080, ENSG00000206561, ENSG00000082196, ENSG00000123500, ENSG00000215018, ENSG00000164932, ENSG00000038945, ENSG00000196739, ENSG00000102265	MBL2, MMP13, C1QL4, DCN, GLDN, EMILIN2, COLEC12, COL8A2, COL6A1, COL6A2, EMID1, C1QTNF6, COL6A3, EMILIN1, COLQ, C1QTNF3, COL10A1, COL28A1, CTHRC1, MSR1, COL27A1, TIMP1	upregulated
GO:0031032	actomyosin structure organization	GO:BP	9.16e-06	201	35	ENSG00000078114, ENSG00000122367, ENSG00000148677, ENSG00000165410, ENSG00000140030, ENSG00000104067, ENSG00000159251, ENSG00000128872, ENSG00000138594, ENSG00000128849, ENSG00000140416, ENSG00000109063, ENSG00000133026, ENSG00000101605, ENSG00000134775, ENSG00000082397, ENSG00000130176, ENSG00000105357, ENSG00000074964, ENSG00000118194, ENSG00000159176, ENSG00000163431, ENSG00000117519, ENSG0000…	NEBL, LDB3, ANKRD1, CFL2, GPR65, TJP1, ACTC1, TMOD2, TMOD3, CGNL1, TPM1, MYH3, MYH10, MYOM1, FHOD3, EPB41L3, CNN1, MYH14, ARHGEF10L, TNNT2, CSRP1, LMOD1, CNN3, EPB41L5, MYOZ2, LIMCH1, EDN1, EPB41L2, CTGF, ARHGEF5, PPP1R9A, DLC1, PGM5, ARHGAP6, FRMD7	downregulated
GO:0009605	response to external stimulus	GO:BP	9.56e-06	2923	432	ENSG00000151892, ENSG00000066468, ENSG00000187908, ENSG00000170430, ENSG00000151640, ENSG00000151651, ENSG00000107611, ENSG00000170759, ENSG00000099250, ENSG00000165731, ENSG00000198964, ENSG00000165471, ENSG00000122877, ENSG00000138347, ENSG00000107731, ENSG00000156026, ENSG00000122861, ENSG00000107796, ENSG00000148677, ENSG00000155629, ENSG00000150782, ENSG00000182985, ENSG00000137699, ENSG0000…	GFRA1, FGFR2, DMBT1, MGMT, DPYSL4, ADAM8, CUBN, KIF5B, NRP1, RET, SGMS1, MBL2, EGR2, MYPN, UNC5B, MCU, PLAU, ACTA2, ANKRD1, PIK3AP1, IL18, CADM1, TRIM29, SORL1, UBASH3B, ROBO4, TSPAN32, LGR4, BDNF, IFITM2, IFITM1, PAX6, IFITM3, CD44, SIGIRR, MDK, TRIM6, SERPING1, NRXN2, BATF2, FOSL1, FOLR1, GABARAPL1, KLRC2, CRY1, SH2B3, OAS1, OAS2, NOS1, OASL, PTPRO, CACNA2D4, C12orf39, ABCD2, LRRK2, KIF5A, HMGA…	any
GO:0097485	neuron projection guidance	GO:BP	9.59e-06	286	68	ENSG00000151892, ENSG00000151640, ENSG00000170759, ENSG00000099250, ENSG00000165731, ENSG00000122877, ENSG00000138347, ENSG00000107731, ENSG00000154133, ENSG00000176697, ENSG00000007372, ENSG00000151490, ENSG00000155980, ENSG00000074527, ENSG00000070182, ENSG00000100784, ENSG00000137872, ENSG00000156642, ENSG00000185033, ENSG00000125170, ENSG00000198211, ENSG00000258947, ENSG00000141738, ENSG0000…	GFRA1, DPYSL4, KIF5B, NRP1, RET, EGR2, MYPN, UNC5B, ROBO4, BDNF, PAX6, PTPRO, KIF5A, NTN4, SPTB, RPS6KA5, SEMA6D, NPTN, SEMA4B, DOK4, TUBB3, TUBB3, GRB7, MYH10, NTN1, PTPRM, SEMA6B, DRAXIN, SHC1, EFNA1, LHX9, NEXN, DOK5, RAC2, GLI2, KIF5C, CHN1, TMEFF2, NRXN1, BOC, CNTN4, CELSR3, SEMA3B, WNT5A, ROBO2, BMPR1B, UNC5C, CSF1R, PDLIM7, EMB, LAMA2, EZR, TUBB2B, VEGFA, RELN, NRCAM, PLXNA4, ETV1, ISPD, S…	any
GO:0030018	Z disc	GO:CC	1.09e-05	132	26	ENSG00000078114, ENSG00000122367, ENSG00000109846, ENSG00000196876, ENSG00000165410, ENSG00000072110, ENSG00000263155, ENSG00000101605, ENSG00000101608, ENSG00000118680, ENSG00000134775, ENSG00000159176, ENSG00000184588, ENSG00000162614, ENSG00000101335, ENSG00000149596, ENSG00000183023, ENSG00000172403, ENSG00000172399, ENSG00000154556, ENSG00000196923, ENSG00000128591, ENSG00000105993, ENSG0000…	NEBL, LDB3, CRYAB, SCN8A, CFL2, ACTN1, MYZAP, MYOM1, MYL12A, MYL12B, FHOD3, CSRP1, PDE4B, NEXN, MYL9, JPH2, SLC8A1, SYNPO2, MYOZ2, SORBS2, PDLIM7, FLNC, DNAJB6, PDLIM2, JPH1, PGM5	downregulated
GO:0007165	signal transduction	GO:BP	1.1e-05	6296	454	ENSG00000107554, ENSG00000108018, ENSG00000138166, ENSG00000151892, ENSG00000151651, ENSG00000165757, ENSG00000099250, ENSG00000177283, ENSG00000165731, ENSG00000128805, ENSG00000107984, ENSG00000150347, ENSG00000107731, ENSG00000122861, ENSG00000108175, ENSG00000187240, ENSG00000050165, ENSG00000080854, ENSG00000130592, ENSG00000064201, ENSG00000176971, ENSG00000185201, ENSG00000185885, ENSG0000…	DNMBP, SORCS1, DUSP5, GFRA1, ADAM8, KIAA1462, NRP1, FZD8, RET, ARHGAP22, DKK1, ARID5B, UNC5B, PLAU, ZMIZ1, DYNC2H1, DKK3, IGSF9B, LSP1, TSPAN32, FIBIN, IFITM2, IFITM1, IFITM3, DEPDC7, CD44, SIGIRR, MDK, LRP4, AC104389.28, LGALS12, FERMT3, NRXN2, LTBP3, FAM89B, CNIH2, RIN1, TPP1, DCHS1, CAPN5, PIDD, KLRC2, KLRC1, SH2B3, TAS2R30, OAS1, OAS2, NOS1, OASL, GPRC5A, RASSF8, LRRK2, RAPGEF3, C1QL4, ACVRL1…	upregulated
GO:0032279	asymmetric synapse	GO:CC	1.14e-05	348	76	ENSG00000109846, ENSG00000149403, ENSG00000080854, ENSG00000148948, ENSG00000134569, ENSG00000174871, ENSG00000087053, ENSG00000089250, ENSG00000151490, ENSG00000155974, ENSG00000111052, ENSG00000133083, ENSG00000178235, ENSG00000179841, ENSG00000156642, ENSG00000205363, ENSG00000080644, ENSG00000136379, ENSG00000140600, ENSG00000237515, ENSG00000169181, ENSG00000167371, ENSG00000128482, ENSG0000…	CRYAB, GRIK4, IGSF9B, LRRC4C, LRP4, CNIH2, MTMR2, NOS1, PTPRO, GRIP1, LIN7A, DCLK1, SLITRK1, AKAP5, NPTN, C15orf59, CHRNA3, ABHD17C, SH3GL3, SHISA9, GSG1L, PRRT2, RNF112, MPP2, RGS9, CACNG4, GRIN2C, CDH2, EPB41L3, LIN7B, LRRC4B, CACNG7, PALM, DNM3, ADORA1, DISC1, ACTN2, CHRM3, EPB41, KCNAB2, DNAJC6, PDE4B, CNN3, LZTS3, MX1, P2RX6, BCR, NEFH, MAPK8IP2, PKP4, MAP2, ERBB4, SYN2, TMEM108, P2RY1, ADRA…	any
GO:0051272	positive regulation of cellular component movement	GO:BP	1.14e-05	602	72	ENSG00000151651, ENSG00000165757, ENSG00000099250, ENSG00000165731, ENSG00000122861, ENSG00000110492, ENSG00000149781, ENSG00000176973, ENSG00000171860, ENSG00000133110, ENSG00000157227, ENSG00000131981, ENSG00000137872, ENSG00000140285, ENSG00000035664, ENSG00000166949, ENSG00000185033, ENSG00000102879, ENSG00000103490, ENSG00000140678, ENSG00000168961, ENSG00000141738, ENSG00000126561, ENSG0000…	ADAM8, KIAA1462, NRP1, RET, PLAU, MDK, FERMT3, FAM89B, C3AR1, POSTN, MMP14, LGALS3, SEMA6D, FGF7, DAPK2, SMAD3, SEMA4B, CORO1A, PYCARD, ITGAX, LGALS9, GRB7, STAT5A, SOX9, SPHK1, SERPINB3, MIR27A, MIR23A, TGFB1, SEMA6B, CSF1, TRIM46, NOS1AP, TNFSF18, PTGS2, PTPRC, CYR61, RIN2, PREX1, BMP2, RAC2, MAP4K4, TNFAIP6, ITGA4, FN1, MYLK, BCL6, PPP3CA, PDGFRA, IL8, TERT, CSF1R, CD74, ITGA2, VEGFA, RELN, DO…	upregulated
GO:0030154	cell differentiation	GO:BP	1.17e-05	4335	328	ENSG00000198873, ENSG00000066468, ENSG00000148848, ENSG00000170430, ENSG00000151640, ENSG00000078114, ENSG00000095739, ENSG00000170759, ENSG00000107738, ENSG00000122367, ENSG00000107796, ENSG00000148677, ENSG00000095587, ENSG00000165887, ENSG00000137710, ENSG00000150782, ENSG00000182985, ENSG00000149591, ENSG00000137642, ENSG00000154127, ENSG00000149571, ENSG00000133818, ENSG00000110693, ENSG0000…	GRK5, FGFR2, ADAM12, MGMT, DPYSL4, NEBL, BAMBI, KIF5B, C10orf54, LDB3, ACTA2, ANKRD1, TLL2, ANKRD2, RDX, IL18, CADM1, TAGLN, SORL1, UBASH3B, KIRREL3, RRAS2, SOX6, HTATIP2, LGR4, BDNF, PAX6, PKP3, OR51E2, TRIM6, EHD1, PPP2R5B, LRP5, FOLR1, MTMR2, SRRM4, CCDC64, STX2, MGP, PTPRO, PKP2, CNTN1, KRT80, KRT86, KRT81, ERBB3, DPY19L2, GRIP1, PTPRQ, NTN4, MYO16, GAS6, FGF9, ATP8A2, WASF3, CDX2, FLT1, FRY,…	downregulated
GO:0048585	negative regulation of response to stimulus	GO:BP	1.21e-05	1731	276	ENSG00000138166, ENSG00000095739, ENSG00000099250, ENSG00000107984, ENSG00000099282, ENSG00000107731, ENSG00000122861, ENSG00000050165, ENSG00000137642, ENSG00000154127, ENSG00000184545, ENSG00000198168, ENSG00000205213, ENSG00000176697, ENSG00000026508, ENSG00000135362, ENSG00000185187, ENSG00000110492, ENSG00000134569, ENSG00000149131, ENSG00000068971, ENSG00000176973, ENSG00000087053, ENSG0000…	DUSP5, BAMBI, NRP1, DKK1, TSPAN15, UNC5B, PLAU, DKK3, SORL1, UBASH3B, DUSP8, SVIP, LGR4, BDNF, CD44, PRR5L, SIGIRR, MDK, LRP4, SERPING1, PPP2R5B, FAM89B, MTMR2, CRY1, SH2B3, DUSP16, GPRC5A, PTPRO, C12orf39, ABCD2, LRRK2, C1QL4, IGFBP6, ERBB3, HMGA2, PTPRR, TSPAN8, PAWR, DUSP6, DCN, A2M, GAS6, LATS2, FGF9, SHISA2, GPR18, NDRG2, MMP14, AJUBA, MBIP, BMP4, LGALS3, LGMN, BDKRB2, THBS1, SEMA6D, CGNL1, …	any
GO:0006939	smooth muscle contraction	GO:BP	1.32e-05	112	36	ENSG00000107796, ENSG00000134548, ENSG00000070961, ENSG00000102468, ENSG00000136160, ENSG00000168398, ENSG00000080644, ENSG00000183044, ENSG00000170425, ENSG00000196689, ENSG00000176170, ENSG00000130176, ENSG00000160716, ENSG00000073756, ENSG00000116741, ENSG00000163485, ENSG00000135744, ENSG00000179546, ENSG00000133019, ENSG00000171873, ENSG00000196839, ENSG00000064989, ENSG00000119782, ENSG0000…	ACTA2, C12orf39, ATP2B1, HTR2A, EDNRB, BDKRB2, CHRNA3, ABAT, ADORA2B, TRPV1, SPHK1, CNN1, CHRNB2, PTGS2, RGS2, ADORA1, AGT, HTR1D, CHRM3, ADRA1D, ADA, CALCRL, FKBP1B, SLC8A1, MYLK, OXTR, EDNRA, ADRA2C, NMU, ITGA2, PDE4D, EDN1, DOCK4, GPER1, DOCK5, SULF1	any
GO:0032990	cell part morphogenesis	GO:BP	1.32e-05	711	80	ENSG00000066468, ENSG00000151640, ENSG00000170759, ENSG00000149571, ENSG00000176697, ENSG00000007372, ENSG00000151490, ENSG00000155974, ENSG00000074527, ENSG00000041515, ENSG00000132932, ENSG00000133083, ENSG00000152767, ENSG00000070182, ENSG00000156642, ENSG00000125170, ENSG00000083290, ENSG00000133026, ENSG00000065320, ENSG00000170558, ENSG00000082397, ENSG00000173482, ENSG00000130203, ENSG0000…	FGFR2, DPYSL4, KIF5B, KIRREL3, BDNF, PAX6, PTPRO, GRIP1, NTN4, MYO16, ATP8A2, DCLK1, FARP1, SPTB, NPTN, DOK4, ULK2, MYH10, NTN1, CDH2, EPB41L3, PTPRM, APOE, MYH14, LRRC4B, CACNG7, CELSR2, AMIGO1, NGF, PDPN, EFNA1, DNM3, DISC1, NEXN, LZTS3, PARD6B, DOK5, RTN4R, NEFH, MAPK8IP2, GLI2, LRP2, CHN1, MAP2, NYAP2, NGEF, KIF1A, NRXN1, KALRN, TMEM108, CNTN4, CSPG5, CELSR3, SEMA3B, WNT5A, ROBO2, SNX2, PDLIM…	downregulated
GO:0032102	negative regulation of response to external stimulus	GO:BP	1.34e-05	417	89	ENSG00000099250, ENSG00000122861, ENSG00000154127, ENSG00000185187, ENSG00000110492, ENSG00000149131, ENSG00000111252, ENSG00000151490, ENSG00000134548, ENSG00000173208, ENSG00000127324, ENSG00000175899, ENSG00000125245, ENSG00000137801, ENSG00000137872, ENSG00000166949, ENSG00000185033, ENSG00000103490, ENSG00000183044, ENSG00000132386, ENSG00000168961, ENSG00000108691, ENSG00000126368, ENSG0000…	NRP1, PLAU, UBASH3B, SIGIRR, MDK, SERPING1, SH2B3, PTPRO, C12orf39, ABCD2, TSPAN8, A2M, GPR18, THBS1, SEMA6D, SMAD3, SEMA4B, PYCARD, ABAT, SERPINF1, LGALS9, CCL2, NR1D1, DHX58, DUSP3, RNF125, SERPINB4, ACP5, ZFP36, CEACAM1, APOE, SEMA6B, C5AR2, NLRP12, TNFRSF1B, DCST1, IFI16, PTPRC, ADORA1, SMPDL3B, CST7, ADA, RTN4R, BCR, KREMEN1, PROC, GPR17, TNFAIP6, DPP4, FAP, CALCRL, SERPINE2, UCN, NRXN1, PPA…	any
GO:0007160	cell-matrix adhesion	GO:BP	1.36e-05	230	58	ENSG00000099250, ENSG00000122861, ENSG00000026508, ENSG00000139567, ENSG00000139626, ENSG00000135424, ENSG00000139220, ENSG00000133110, ENSG00000157227, ENSG00000129474, ENSG00000073712, ENSG00000072110, ENSG00000248905, ENSG00000137801, ENSG00000166949, ENSG00000102854, ENSG00000173801, ENSG00000108861, ENSG00000187244, ENSG00000076826, ENSG00000162692, ENSG00000184371, ENSG00000143127, ENSG0000…	NRP1, PLAU, CD44, ACVRL1, ITGB7, ITGA7, PPFIA2, POSTN, MMP14, AJUBA, FERMT2, ACTN1, FMN1, THBS1, SMAD3, MSLN, JUP, DUSP3, BCAM, CAMSAP3, VCAM1, CSF1, ITGA10, PIP5K1A, THBS3, DISC1, NID1, ACTN2, COL16A1, RIN2, BCR, MAP4K4, EPB41L5, ITGA4, FN1, SNED1, EMILIN1, BCL6, APOD, ADAMTS9, FGB, FGG, LIMCH1, HPSE, CCL28, ITGA2, CTGF, VEGFA, SERPINE1, ITGB8, EPDR1, SEMA3E, CDK6, DLC1, TEK, ECM2, ARHGAP6, L1CAM	any
GO:0120039	plasma membrane bounded cell projection morphogenesis	GO:BP	1.38e-05	687	78	ENSG00000066468, ENSG00000151640, ENSG00000170759, ENSG00000149571, ENSG00000176697, ENSG00000007372, ENSG00000151490, ENSG00000155974, ENSG00000074527, ENSG00000041515, ENSG00000132932, ENSG00000133083, ENSG00000152767, ENSG00000070182, ENSG00000156642, ENSG00000125170, ENSG00000083290, ENSG00000133026, ENSG00000065320, ENSG00000170558, ENSG00000082397, ENSG00000173482, ENSG00000130203, ENSG0000…	FGFR2, DPYSL4, KIF5B, KIRREL3, BDNF, PAX6, PTPRO, GRIP1, NTN4, MYO16, ATP8A2, DCLK1, FARP1, SPTB, NPTN, DOK4, ULK2, MYH10, NTN1, CDH2, EPB41L3, PTPRM, APOE, LRRC4B, CACNG7, CELSR2, AMIGO1, NGF, PDPN, EFNA1, DNM3, DISC1, NEXN, LZTS3, PARD6B, DOK5, RTN4R, NEFH, MAPK8IP2, GLI2, LRP2, CHN1, MAP2, NYAP2, NGEF, KIF1A, NRXN1, KALRN, TMEM108, CNTN4, CELSR3, SEMA3B, WNT5A, ROBO2, SNX2, PDLIM7, EMB, DYNLT1…	downregulated
GO:0007010	cytoskeleton organization	GO:BP	1.39e-05	1371	227	ENSG00000099204, ENSG00000019995, ENSG00000078114, ENSG00000099250, ENSG00000072422, ENSG00000138347, ENSG00000156026, ENSG00000122367, ENSG00000148677, ENSG00000137710, ENSG00000109846, ENSG00000149564, ENSG00000064201, ENSG00000007372, ENSG00000110492, ENSG00000099849, ENSG00000149499, ENSG00000139354, ENSG00000123094, ENSG00000139132, ENSG00000057294, ENSG00000079337, ENSG00000161791, ENSG0000…	ABLIM1, ZRANB1, NEBL, NRP1, RHOBTB1, MYPN, MCU, LDB3, ANKRD1, RDX, CRYAB, ESAM, TSPAN32, PAX6, MDK, RASSF7, EML3, GAS2L3, RASSF8, FGD4, PKP2, RAPGEF3, FMNL3, AVIL, PAWR, TUBA3C, ATP8A2, WASF3, KATNAL1, RGCC, LCP1, DIAPH3, FARP1, AJUBA, EFS, CFL2, SPTB, ACTN1, GPR65, CLMN, SYNE3, TJP1, FMN1, ACTC1, FGF7, TMOD2, TMOD3, DYX1C1, CGNL1, TPM1, SMAD3, FAM154B, SYNM, CORO1A, PYCARD, PPL, FHOD1, PARD6A, H…	any
GO:0048584	positive regulation of response to stimulus	GO:BP	1.43e-05	2542	382	ENSG00000138166, ENSG00000203805, ENSG00000066468, ENSG00000019995, ENSG00000170430, ENSG00000151651, ENSG00000150054, ENSG00000095739, ENSG00000165757, ENSG00000107968, ENSG00000170759, ENSG00000099250, ENSG00000177283, ENSG00000165731, ENSG00000107984, ENSG00000165471, ENSG00000107731, ENSG00000156026, ENSG00000108175, ENSG00000108219, ENSG00000148677, ENSG00000155629, ENSG00000187240, ENSG0000…	DUSP5, PPAPDC1A, FGFR2, ZRANB1, MGMT, ADAM8, MPP7, BAMBI, KIAA1462, MAP3K8, KIF5B, NRP1, FZD8, RET, DKK1, MBL2, UNC5B, MCU, ZMIZ1, TSPAN14, ANKRD1, PIK3AP1, DYNC2H1, IL18, CADM1, SORL1, IGSF9B, LGR4, BDNF, CDKN1C, CD44, PRR5L, MDK, OR51E2, TRIM6, SERPING1, PPP2R5B, SH2B3, HRK, NOS1, LRRK2, ACVRL1, TESPA1, ERBB3, HMGA2, GRIP1, C1S, C1R, C1RL, PAWR, C3AR1, DUSP6, DCN, A2M, TNFSF13B, GAS6, FGF9, TNF…	any
GO:0009611	response to wounding	GO:BP	1.43e-05	702	80	ENSG00000099250, ENSG00000122861, ENSG00000064201, ENSG00000026508, ENSG00000110492, ENSG00000213931, ENSG00000196565, ENSG00000149131, ENSG00000011347, ENSG00000149781, ENSG00000111252, ENSG00000139567, ENSG00000127324, ENSG00000011465, ENSG00000175899, ENSG00000133110, ENSG00000186469, ENSG00000185650, ENSG00000197249, ENSG00000140285, ENSG00000166949, ENSG00000118898, ENSG00000074660, ENSG0000…	NRP1, PLAU, TSPAN32, CD44, MDK, HBE1, HBG2, SERPING1, SYT7, FERMT3, SH2B3, ACVRL1, TSPAN8, DCN, A2M, POSTN, GNG2, ZFP36L1, SERPINA1, FGF7, SMAD3, PPL, SCARF1, GFAP, GRIN2C, CYP4F2, CYP4F11, F2RL3, ZFP36, TGFB1, CEACAM1, VAV3, FCER1G, KCNK2, CYR61, FOXA2, P2RX6, CELSR1, MERTK, FAP, TMEFF2, FN1, SLC11A1, SERPINE2, FKBP1B, ZFP36L2, TGFA, MYLK, P2RY1, APOD, RP5-966M1.6, DCBLD2, PPP3CA, FGB, FGG, PDGF…	upregulated
GO:0001725	stress fiber	GO:CC	1.59e-05	69	18	ENSG00000099204, ENSG00000078114, ENSG00000122367, ENSG00000136167, ENSG00000073712, ENSG00000072110, ENSG00000140416, ENSG00000133026, ENSG00000101608, ENSG00000118680, ENSG00000105357, ENSG00000101335, ENSG00000172403, ENSG00000064042, ENSG00000196923, ENSG00000120913, ENSG00000120156, ENSG00000154330	ABLIM1, NEBL, LDB3, LCP1, FERMT2, ACTN1, TPM1, MYH10, MYL12A, MYL12B, MYH14, MYL9, SYNPO2, LIMCH1, PDLIM7, PDLIM2, TEK, PGM5	downregulated
GO:0097517	contractile actin filament bundle	GO:CC	1.59e-05	69	18	ENSG00000099204, ENSG00000078114, ENSG00000122367, ENSG00000136167, ENSG00000073712, ENSG00000072110, ENSG00000140416, ENSG00000133026, ENSG00000101608, ENSG00000118680, ENSG00000105357, ENSG00000101335, ENSG00000172403, ENSG00000064042, ENSG00000196923, ENSG00000120913, ENSG00000120156, ENSG00000154330	ABLIM1, NEBL, LDB3, LCP1, FERMT2, ACTN1, TPM1, MYH10, MYL12A, MYL12B, MYH14, MYL9, SYNPO2, LIMCH1, PDLIM7, PDLIM2, TEK, PGM5	downregulated
GO:0009967	positive regulation of signal transduction	GO:BP	1.61e-05	1736	276	ENSG00000138166, ENSG00000066468, ENSG00000019995, ENSG00000151651, ENSG00000150054, ENSG00000095739, ENSG00000165757, ENSG00000107968, ENSG00000099250, ENSG00000177283, ENSG00000165731, ENSG00000107984, ENSG00000107731, ENSG00000108175, ENSG00000108219, ENSG00000148677, ENSG00000155629, ENSG00000187240, ENSG00000150782, ENSG00000137642, ENSG00000080854, ENSG00000205213, ENSG00000176697, ENSG0000…	DUSP5, FGFR2, ZRANB1, ADAM8, MPP7, BAMBI, KIAA1462, MAP3K8, NRP1, FZD8, RET, DKK1, UNC5B, ZMIZ1, TSPAN14, ANKRD1, PIK3AP1, DYNC2H1, IL18, SORL1, IGSF9B, LGR4, BDNF, CDKN1C, CD44, PRR5L, OR51E2, TRIM6, PPP2R5B, SH2B3, HRK, NOS1, LRRK2, ACVRL1, TESPA1, ERBB3, GRIP1, DUSP6, DCN, GAS6, FGF9, TNFRSF19, FLT1, HTR2A, LPAR6, SCEL, NDFIP2, GPR18, AJUBA, RIPK3, BMP4, GPR65, THBS1, FGF7, TNFAIP8L3, TMOD2, S…	any
GO:0098609	cell-cell adhesion	GO:BP	1.61e-05	866	92	ENSG00000107968, ENSG00000107738, ENSG00000137710, ENSG00000150782, ENSG00000182985, ENSG00000137699, ENSG00000154127, ENSG00000149571, ENSG00000184363, ENSG00000057294, ENSG00000177425, ENSG00000118946, ENSG00000129474, ENSG00000168952, ENSG00000125378, ENSG00000104067, ENSG00000138594, ENSG00000156642, ENSG00000183044, ENSG00000108861, ENSG00000069188, ENSG00000065320, ENSG00000170558, ENSG0000…	MAP3K8, C10orf54, RDX, IL18, CADM1, TRIM29, UBASH3B, KIRREL3, PKP3, PKP2, PAWR, PCDH17, AJUBA, STXBP6, BMP4, TJP1, TMOD3, NPTN, ABAT, DUSP3, SDK2, NTN1, CDH2, DSG2, MYL12A, PTPRM, TWSG1, PVR, LRRC4B, FSTL3, CAMSAP3, CELSR2, AMIGO1, PDPN, CSRP1, TGFB2, KIF26B, COL16A1, NEGR1, NEXN, CNN3, MMP24, MYL9, EPB41L5, GLI2, LIMS2, PKP4, NRXN1, PELI1, PODXL2, IL12A, CLDN1, CNTN4, CELSR3, WNT5A, ROBO2, FAT4,…	downregulated
GO:0023051	regulation of signaling	GO:BP	1.67e-05	3679	289	ENSG00000107554, ENSG00000138166, ENSG00000151651, ENSG00000165757, ENSG00000099250, ENSG00000177283, ENSG00000165731, ENSG00000128805, ENSG00000107984, ENSG00000122877, ENSG00000107731, ENSG00000122861, ENSG00000108175, ENSG00000187240, ENSG00000050165, ENSG00000080854, ENSG00000121690, ENSG00000026508, ENSG00000148948, ENSG00000185187, ENSG00000110492, ENSG00000134569, ENSG00000011347, ENSG0000…	DNMBP, DUSP5, ADAM8, KIAA1462, NRP1, FZD8, RET, ARHGAP22, DKK1, EGR2, UNC5B, PLAU, ZMIZ1, DYNC2H1, DKK3, IGSF9B, DEPDC7, CD44, LRRC4C, SIGIRR, MDK, LRP4, SYT7, FAM89B, CNIH2, RIN1, PIDD, SH2B3, NOS1, GPRC5A, LRRK2, RAPGEF3, C1QL4, ACVRL1, IGFBP6, TESPA1, PLEKHG6, PPFIA2, DUSP6, ATP2B1, DCN, A2M, MCF2L, TNFRSF19, POSTN, LPAR6, GPC6, GPR18, BEGAIN, MMP14, RIPK3, LGALS3, GPR68, BDKRB2, FGF7, TNFAIP8…	upregulated
GO:0098794	postsynapse	GO:CC	1.67e-05	638	120	ENSG00000099250, ENSG00000122862, ENSG00000109846, ENSG00000149403, ENSG00000080854, ENSG00000148948, ENSG00000134569, ENSG00000174871, ENSG00000087053, ENSG00000089250, ENSG00000151490, ENSG00000188906, ENSG00000018236, ENSG00000155974, ENSG00000111052, ENSG00000139220, ENSG00000132970, ENSG00000133083, ENSG00000102468, ENSG00000118946, ENSG00000178695, ENSG00000178235, ENSG00000152767, ENSG0000…	NRP1, SRGN, CRYAB, GRIK4, IGSF9B, LRRC4C, LRP4, CNIH2, MTMR2, NOS1, PTPRO, LRRK2, CNTN1, GRIP1, LIN7A, PPFIA2, WASF3, DCLK1, HTR2A, PCDH17, KCTD12, SLITRK1, FARP1, AKAP5, GABRA5, GABRB3, SHC4, NPTN, C15orf59, CHRNA3, ABHD17C, SH3GL3, SHISA9, GSG1L, PRRT2, RNF112, TRPV1, NR1D1, MPP2, RGS9, CACNG4, GRIN2C, MYH10, CDH2, EPB41L3, GIPC1, LIN7B, LRRC4B, CACNG7, PALM, PALMD, SLC6A17, CHRNB2, DNM3, ADORA…	any
GO:0030335	positive regulation of cell migration	GO:BP	1.69e-05	560	68	ENSG00000151651, ENSG00000165757, ENSG00000099250, ENSG00000165731, ENSG00000122861, ENSG00000110492, ENSG00000149781, ENSG00000176973, ENSG00000171860, ENSG00000133110, ENSG00000157227, ENSG00000131981, ENSG00000137872, ENSG00000140285, ENSG00000035664, ENSG00000166949, ENSG00000185033, ENSG00000102879, ENSG00000103490, ENSG00000140678, ENSG00000168961, ENSG00000141738, ENSG00000126561, ENSG0000…	ADAM8, KIAA1462, NRP1, RET, PLAU, MDK, FERMT3, FAM89B, C3AR1, POSTN, MMP14, LGALS3, SEMA6D, FGF7, DAPK2, SMAD3, SEMA4B, CORO1A, PYCARD, ITGAX, LGALS9, GRB7, STAT5A, SOX9, SPHK1, SERPINB3, MIR27A, MIR23A, TGFB1, SEMA6B, CSF1, TNFSF18, PTGS2, PTPRC, CYR61, RIN2, PREX1, BMP2, RAC2, MAP4K4, TNFAIP6, ITGA4, FN1, MYLK, PPP3CA, PDGFRA, IL8, TERT, CSF1R, CD74, ITGA2, VEGFA, RELN, DOCK4, IL6, CLDN4, SEMA3…	upregulated
GO:0031982	vesicle	GO:CC	1.7e-05	3914	299	ENSG00000065621, ENSG00000151892, ENSG00000187908, ENSG00000151651, ENSG00000107611, ENSG00000204740, ENSG00000099250, ENSG00000165731, ENSG00000107984, ENSG00000122861, ENSG00000187240, ENSG00000133805, ENSG00000154133, ENSG00000134955, ENSG00000130592, ENSG00000198168, ENSG00000142089, ENSG00000026508, ENSG00000085117, ENSG00000019505, ENSG00000149131, ENSG00000011347, ENSG00000124942, ENSG0000…	GSTO2, GFRA1, DMBT1, ADAM8, CUBN, MALRD1, NRP1, RET, DKK1, PLAU, DYNC2H1, AMPD3, ROBO4, SLC37A2, LSP1, SVIP, IFITM3, CD44, CD82, SYT13, SERPING1, SYT7, AHNAK, FERMT3, DNHD1, LTBP3, CNIH2, TPP1, CAPN5, HVCN1, NOS1, GPRC5A, H2AFJ, LRMP, REP15, LRRK2, RAPGEF3, SMAGP, KRT75, ITGB7, LRIG3, SCNN1A, TSPAN8, C1RL, RBP5, PHLDA1, LIN7A, PPFIA2, C3AR1, RASSF9, GALNT4, ATP2B1, A2M, GPR18, AHNAK2, C14orf79, M…	upregulated
GO:0043408	regulation of MAPK cascade	GO:BP	1.7e-05	756	140	ENSG00000138166, ENSG00000066468, ENSG00000151651, ENSG00000165757, ENSG00000107968, ENSG00000099250, ENSG00000177283, ENSG00000165731, ENSG00000107984, ENSG00000137642, ENSG00000184545, ENSG00000026508, ENSG00000111252, ENSG00000111266, ENSG00000188906, ENSG00000186897, ENSG00000153233, ENSG00000139318, ENSG00000183087, ENSG00000102678, ENSG00000127863, ENSG00000102755, ENSG00000102468, ENSG0000…	DUSP5, FGFR2, ADAM8, KIAA1462, MAP3K8, NRP1, FZD8, RET, DKK1, SORL1, DUSP8, CD44, SH2B3, DUSP16, LRRK2, C1QL4, PTPRR, DUSP6, GAS6, FGF9, TNFRSF19, FLT1, HTR2A, NDRG2, AJUBA, MBIP, BMP4, THBS1, TNFAIP8L3, NPTN, IGF1R, PYCARD, DOK4, MARVELD3, ADORA2B, LGALS9, CCL2, DUSP3, SLC9A3R1, SPHK1, CDH2, GAREM, SERPINB3, MIR27A, MIR23A, GDF15, GADD45B, SPRED3, CEACAM1, APOE, SHC2, C5AR2, NLRP12, IL11, PTPN22…	any
GO:0007411	axon guidance	GO:BP	1.75e-05	284	67	ENSG00000151892, ENSG00000170759, ENSG00000099250, ENSG00000165731, ENSG00000122877, ENSG00000138347, ENSG00000107731, ENSG00000154133, ENSG00000176697, ENSG00000007372, ENSG00000151490, ENSG00000155980, ENSG00000074527, ENSG00000070182, ENSG00000100784, ENSG00000137872, ENSG00000156642, ENSG00000185033, ENSG00000125170, ENSG00000198211, ENSG00000258947, ENSG00000141738, ENSG00000133026, ENSG0000…	GFRA1, KIF5B, NRP1, RET, EGR2, MYPN, UNC5B, ROBO4, BDNF, PAX6, PTPRO, KIF5A, NTN4, SPTB, RPS6KA5, SEMA6D, NPTN, SEMA4B, DOK4, TUBB3, TUBB3, GRB7, MYH10, NTN1, PTPRM, SEMA6B, DRAXIN, SHC1, EFNA1, LHX9, NEXN, DOK5, RAC2, GLI2, KIF5C, CHN1, TMEFF2, NRXN1, BOC, CNTN4, CELSR3, SEMA3B, WNT5A, ROBO2, BMPR1B, UNC5C, CSF1R, PDLIM7, EMB, LAMA2, EZR, TUBB2B, VEGFA, RELN, NRCAM, PLXNA4, ETV1, ISPD, SEMA3C, S…	any
GO:1902533	positive regulation of intracellular signal transduction	GO:BP	1.78e-05	1050	182	ENSG00000138166, ENSG00000066468, ENSG00000151651, ENSG00000165757, ENSG00000107968, ENSG00000099250, ENSG00000177283, ENSG00000165731, ENSG00000107984, ENSG00000107731, ENSG00000148677, ENSG00000155629, ENSG00000150782, ENSG00000026508, ENSG00000135362, ENSG00000167332, ENSG00000089250, ENSG00000188906, ENSG00000065361, ENSG00000139318, ENSG00000011465, ENSG00000183087, ENSG00000102678, ENSG0000…	DUSP5, FGFR2, ADAM8, KIAA1462, MAP3K8, NRP1, FZD8, RET, DKK1, UNC5B, ANKRD1, PIK3AP1, IL18, CD44, PRR5L, OR51E2, NOS1, LRRK2, ERBB3, DUSP6, DCN, GAS6, FGF9, TNFRSF19, FLT1, HTR2A, LPAR6, NDFIP2, GPR18, AJUBA, RIPK3, BMP4, GPR65, THBS1, FGF7, TNFAIP8L3, NPTN, RASGRF1, IGF1R, GPRC5B, NUPR1, PYCARD, DOK4, GPR56, MC1R, ADORA2B, HIC1, LGALS9, CCL2, DHX58, SEPT4, SOX9, SLC9A3R1, SPHK1, CARD14, SECTM1, …	any
GO:0050808	synapse organization	GO:BP	1.97e-05	430	56	ENSG00000122862, ENSG00000149571, ENSG00000176697, ENSG00000087053, ENSG00000149972, ENSG00000151490, ENSG00000132970, ENSG00000118946, ENSG00000152767, ENSG00000072110, ENSG00000100600, ENSG00000166206, ENSG00000156642, ENSG00000140443, ENSG00000108852, ENSG00000069188, ENSG00000133026, ENSG00000065320, ENSG00000170558, ENSG00000130203, ENSG00000131409, ENSG00000099864, ENSG00000181754, ENSG0000…	SRGN, KIRREL3, BDNF, MTMR2, CNTN5, PTPRO, WASF3, PCDH17, FARP1, ACTN1, LGMN, GABRB3, NPTN, IGF1R, MPP2, SDK2, MYH10, NTN1, CDH2, APOE, LRRC4B, PALM, AMIGO1, EFNA1, DNM3, DISC1, LZTS3, ITSN1, NEFH, CACNB4, ERBB4, NGEF, KIF1A, NRXN1, KALRN, TMEM108, WNT5A, ERC2, PDZRN3, ROBO2, OXTR, GLRB, PCDHB3, NRCAM, ELFN1, SDK1, PCLO, SEMA3E, FZD1, PPP1R9A, PTPRD, COL4A5, GPC4, L1CAM, CNKSR2, ARHGEF9	downregulated
GO:0012505	endomembrane system	GO:CC	2.31e-05	4539	628	ENSG00000107554, ENSG00000099194, ENSG00000108018, ENSG00000197142, ENSG00000151892, ENSG00000198873, ENSG00000066468, ENSG00000187908, ENSG00000182022, ENSG00000188385, ENSG00000151651, ENSG00000107611, ENSG00000165996, ENSG00000204740, ENSG00000099246, ENSG00000099250, ENSG00000177283, ENSG00000165731, ENSG00000204176, ENSG00000198964, ENSG00000107984, ENSG00000122862, ENSG00000099282, ENSG0000…	DNMBP, SCD, SORCS1, ACSL5, GFRA1, GRK5, FGFR2, DMBT1, CHST15, JAKMIP3, ADAM8, CUBN, PTPLA, MALRD1, RAB18, NRP1, FZD8, RET, SYT15, SGMS1, DKK1, SRGN, TSPAN15, CHST3, PLAU, TSPAN14, SLC35G1, TBC1D12, DYNC2H1, AMPD3, MRVI1, CRYAB, GALNT18, PCSK7, SC5D, SORL1, GRAMD1B, SLC37A2, KIRREL3, RRAS2, HTATIP2, ANO5, SVIP, FIBIN, BDNF, IFITM3, CD44, SYT13, OR51E2, SERPING1, SYT7, MYRF, FERMT3, EHD1, GAL3ST3, …	any
GO:0005509	calcium ion binding	GO:MF	2.32e-05	717	78	ENSG00000170430, ENSG00000204176, ENSG00000095587, ENSG00000135378, ENSG00000068831, ENSG00000110047, ENSG00000111341, ENSG00000196465, ENSG00000092841, ENSG00000183087, ENSG00000136167, ENSG00000118946, ENSG00000131979, ENSG00000072110, ENSG00000137801, ENSG00000137841, ENSG00000117906, ENSG00000183496, ENSG00000157766, ENSG00000140807, ENSG00000091622, ENSG00000170558, ENSG00000046604, ENSG0000…	MGMT, SYT15, TLL2, PRRG4, RASGRP2, EHD1, MGP, MYL6B, MYL6, GAS6, LCP1, PCDH17, GCH1, ACTN1, THBS1, PLCB2, RCN2, MEX3B, ACAN, NKD1, PITPNM3, CDH2, DSG2, MYL12A, MYL12B, CCBE1, DLL3, CELSR2, S100A2, PADI1, TNNT2, MYL9, ITSN1, TRPM2, SCUBE1, PROC, LRP2, MATN3, MYL1, RASGRP3, SLC8A1, CALM2, NRXN1, DYSF, FSTL1, PLS1, CLEC3B, CELSR3, TNNC1, PROS1, EGF, FAT4, DCHS2, PCDH7, PCDHA1, PCDHA3, PCDHA4, PCDHA5…	downregulated
GO:0040017	positive regulation of locomotion	GO:BP	2.47e-05	613	72	ENSG00000151651, ENSG00000165757, ENSG00000099250, ENSG00000165731, ENSG00000122861, ENSG00000110492, ENSG00000149781, ENSG00000176973, ENSG00000171860, ENSG00000133110, ENSG00000157227, ENSG00000131981, ENSG00000137872, ENSG00000140285, ENSG00000035664, ENSG00000166949, ENSG00000185033, ENSG00000102879, ENSG00000103490, ENSG00000140678, ENSG00000168961, ENSG00000141738, ENSG00000126561, ENSG0000…	ADAM8, KIAA1462, NRP1, RET, PLAU, MDK, FERMT3, FAM89B, C3AR1, POSTN, MMP14, LGALS3, SEMA6D, FGF7, DAPK2, SMAD3, SEMA4B, CORO1A, PYCARD, ITGAX, LGALS9, GRB7, STAT5A, SOX9, SPHK1, SERPINB3, MIR27A, MIR23A, TGFB1, SEMA6B, CSF1, TNFSF18, PTGS2, PTPRC, CYR61, RIN2, PREX1, BMP2, RAC2, MAP4K4, TNFAIP6, ITGA4, FN1, SCG2, MYLK, SUCNR1, ZNF502, PPP3CA, PDGFRA, IL8, TERT, CSF1R, CD74, ITGA2, VEGFA, RELN, DO…	upregulated
GO:0007010	cytoskeleton organization	GO:BP	2.74e-05	1371	129	ENSG00000099204, ENSG00000019995, ENSG00000078114, ENSG00000072422, ENSG00000156026, ENSG00000122367, ENSG00000148677, ENSG00000137710, ENSG00000109846, ENSG00000007372, ENSG00000099849, ENSG00000139354, ENSG00000139132, ENSG00000057294, ENSG00000177425, ENSG00000198033, ENSG00000132932, ENSG00000132970, ENSG00000102781, ENSG00000136167, ENSG00000139734, ENSG00000152767, ENSG00000129474, ENSG0000…	ABLIM1, ZRANB1, NEBL, RHOBTB1, MCU, LDB3, ANKRD1, RDX, CRYAB, PAX6, RASSF7, GAS2L3, FGD4, PKP2, PAWR, TUBA3C, ATP8A2, WASF3, KATNAL1, LCP1, DIAPH3, FARP1, AJUBA, CFL2, SPTB, ACTN1, GPR65, CLMN, TJP1, ACTC1, TMOD2, TMOD3, CGNL1, TPM1, SYNM, COTL1, MYH3, SPECC1, FAM101B, SKA2, SLC9A3R1, LLGL2, MYH10, MYOM1, FHOD3, EPB41L3, CNN1, WTIP, APOE, MYH14, PALM, CAMSAP3, PIP5K1A, ARHGEF10L, ARPC5, TNNT2, CS…	downregulated
GO:0051056	regulation of small GTPase mediated signal transduction	GO:BP	2.89e-05	342	76	ENSG00000107554, ENSG00000099250, ENSG00000128805, ENSG00000072422, ENSG00000137710, ENSG00000121690, ENSG00000139132, ENSG00000008323, ENSG00000175899, ENSG00000126217, ENSG00000139679, ENSG00000152767, ENSG00000125245, ENSG00000140030, ENSG00000128849, ENSG00000058335, ENSG00000242173, ENSG00000205336, ENSG00000180448, ENSG00000127533, ENSG00000130203, ENSG00000134215, ENSG00000184371, ENSG0000…	DNMBP, NRP1, ARHGAP22, RHOBTB1, RDX, DEPDC7, FGD4, PLEKHG6, A2M, MCF2L, LPAR6, FARP1, GPR18, GPR65, CGNL1, RASGRF1, ARHGDIG, GPR56, HMHA1, F2RL3, APOE, VAV3, CSF1, NGF, SHC1, ARHGAP30, ARHGEF10L, TGFB2, ARHGEF16, ARHGAP29, PREX1, STMN3, ITSN1, RTN4R, BCR, RAC2, MAP4K4, GPR17, ARHGEF4, ARHGAP15, CHN1, RHOB, NGEF, ARHGAP25, KALRN, BCL6, ARHGEF3, SRGAP3, ARAP3, ARHGEF37, F2RL2, ARHGAP18, KIAA1244, P…	any
GO:0098793	presynapse	GO:CC	3.18e-05	531	103	ENSG00000107554, ENSG00000149403, ENSG00000149571, ENSG00000176697, ENSG00000011347, ENSG00000110076, ENSG00000175592, ENSG00000174669, ENSG00000087053, ENSG00000149972, ENSG00000089250, ENSG00000111450, ENSG00000188906, ENSG00000018236, ENSG00000111052, ENSG00000139220, ENSG00000070961, ENSG00000102468, ENSG00000118946, ENSG00000178695, ENSG00000186297, ENSG00000156642, ENSG00000140600, ENSG0000…	DNMBP, GRIK4, KIRREL3, BDNF, SYT7, NRXN2, FOSL1, SLC29A2, MTMR2, CNTN5, NOS1, STX2, LRRK2, CNTN1, LIN7A, PPFIA2, ATP2B1, HTR2A, PCDH17, KCTD12, GABRA5, NPTN, SH3GL3, MCTP2, SYNGR3, RAB26, PRRT2, STX1B, RNF112, SEPT4, SPHK1, RAB40B, CDH2, RAB27B, GIPC1, ATCAY, LIN7B, LRRC4B, NTNG1, SLC6A17, NGF, RAB13, CHRNB2, DNM3, GLUL, SYT2, ADORA1, KCNK2, DISC1, CHRM3, KCNAB2, DNAJC6, PDE4B, ITSN1, MX1, RTN4R,…	any
GO:0005539	glycosaminoglycan binding	GO:MF	3.24e-05	237	57	ENSG00000066468, ENSG00000099250, ENSG00000204381, ENSG00000166106, ENSG00000026508, ENSG00000110492, ENSG00000011465, ENSG00000102678, ENSG00000133110, ENSG00000125378, ENSG00000119681, ENSG00000140479, ENSG00000137801, ENSG00000140285, ENSG00000157766, ENSG00000205336, ENSG00000103196, ENSG00000127507, ENSG00000130203, ENSG00000060718, ENSG00000169231, ENSG00000132692, ENSG00000081237, ENSG0000…	FGFR2, NRP1, LAYN, ADAMTS15, CD44, MDK, DCN, FGF9, POSTN, BMP4, LTBP2, PCSK6, THBS1, FGF7, ACAN, GPR56, CRISPLD2, EMR2, APOE, COL11A1, THBS3, BCAN, PTPRC, GREM2, COL16A1, CYR61, WISP2, RTN4R, FBLN7, TNFAIP6, FN1, SERPINE2, ABI3BP, FSTL1, PODXL2, COLQ, LXN, LIPH, SUSD5, CLEC3B, FGF2, SPOCK3, HBEGF, FGF1, HAPLN1, WISP3, RSPO3, CTGF, THBS2, TNXB, VEGFA, PCOLCE, TMEM184A, NOV, SULF1, ECM2, BGN	any
GO:0014069	postsynaptic density	GO:CC	3.37e-05	344	46	ENSG00000109846, ENSG00000149403, ENSG00000087053, ENSG00000151490, ENSG00000155974, ENSG00000133083, ENSG00000179841, ENSG00000156642, ENSG00000205363, ENSG00000140600, ENSG00000237515, ENSG00000169181, ENSG00000108852, ENSG00000108370, ENSG00000075461, ENSG00000170558, ENSG00000082397, ENSG00000104863, ENSG00000131409, ENSG00000105605, ENSG00000099864, ENSG00000197959, ENSG00000163485, ENSG0000…	CRYAB, GRIK4, MTMR2, PTPRO, GRIP1, DCLK1, AKAP5, NPTN, C15orf59, SH3GL3, SHISA9, GSG1L, MPP2, RGS9, CACNG4, CDH2, EPB41L3, LIN7B, LRRC4B, CACNG7, PALM, DNM3, ADORA1, DISC1, DNAJC6, PDE4B, CNN3, LZTS3, BCR, NEFH, MAPK8IP2, PKP4, MAP2, ERBB4, TMEM108, ADRA2C, CAP2, NRCAM, GPER1, DGKI, PCLO, PPP1R9A, LYN, FMR1, CNKSR2, ARHGEF9	downregulated
GO:0044297	cell body	GO:CC	3.44e-05	592	112	ENSG00000099250, ENSG00000165731, ENSG00000107796, ENSG00000109846, ENSG00000080854, ENSG00000134569, ENSG00000011347, ENSG00000174791, ENSG00000166405, ENSG00000139112, ENSG00000188906, ENSG00000139567, ENSG00000135437, ENSG00000155980, ENSG00000155974, ENSG00000070961, ENSG00000102468, ENSG00000072415, ENSG00000139985, ENSG00000186297, ENSG00000159251, ENSG00000080644, ENSG00000103490, ENSG0000…	NRP1, RET, ACTA2, CRYAB, IGSF9B, LRP4, SYT7, RIN1, RIC3, GABARAPL1, LRRK2, ACVRL1, RDH5, KIF5A, GRIP1, ATP2B1, HTR2A, MPP5, ADAM21, GABRA5, ACTC1, CHRNA3, PYCARD, GNAO1, SERPINF1, RNF112, TRPV1, PLXDC1, GFAP, PITPNM3, CACNG4, CYGB, MYH10, CD22, TGFB1, KCNN4, APOE, KCNJ14, CACNG7, SORT1, AMIGO1, TNFRSF1B, BGLAP, GLUL, ADORA1, KISS1, KCNK2, TGFB2, DISC1, KCNK1, PLK3, TTLL7, CNN3, ADA, EEF1A2, ITSN1…	any
GO:0003012	muscle system process	GO:BP	3.59e-05	472	59	ENSG00000107796, ENSG00000165887, ENSG00000109846, ENSG00000134548, ENSG00000057294, ENSG00000196465, ENSG00000092841, ENSG00000132932, ENSG00000102468, ENSG00000159251, ENSG00000128872, ENSG00000138594, ENSG00000140416, ENSG00000182253, ENSG00000087258, ENSG00000183044, ENSG00000133020, ENSG00000109061, ENSG00000125414, ENSG00000109063, ENSG00000184185, ENSG00000046604, ENSG00000101605, ENSG0000…	ACTA2, ANKRD2, CRYAB, C12orf39, PKP2, MYL6B, MYL6, ATP8A2, HTR2A, ACTC1, TMOD2, TMOD3, TPM1, SYNM, GNAO1, ABAT, MYH8, MYH1, MYH2, MYH3, KCNJ12, DSG2, MYOM1, MYL12A, MYL12B, CNN1, MYH14, ATP1B1, TNNT2, TNNI1, LMOD1, ADORA1, AGT, HTR1D, PDE4B, SNTA1, MYL9, MYL1, SLC8A1, CALM2, DYSF, STAC, TNNC1, SLMAP, LMCD1, OXTR, MYOZ2, IL15, SORBS2, PPARGC1A, ADRA2C, NMU, EDN1, CTGF, GPER1, CALD1, CACNA2D1, DOCK…	downregulated
GO:0051716	cellular response to stimulus	GO:BP	3.71e-05	7772	1016	ENSG00000107554, ENSG00000065621, ENSG00000108018, ENSG00000138166, ENSG00000107518, ENSG00000151892, ENSG00000198873, ENSG00000203805, ENSG00000066468, ENSG00000019995, ENSG00000170430, ENSG00000068383, ENSG00000151651, ENSG00000148484, ENSG00000099246, ENSG00000150054, ENSG00000095739, ENSG00000165757, ENSG00000107968, ENSG00000170759, ENSG00000099250, ENSG00000177283, ENSG00000165731, ENSG0000…	DNMBP, GSTO2, SORCS1, DUSP5, ATRNL1, GFRA1, GRK5, PPAPDC1A, FGFR2, ZRANB1, MGMT, INPP5A, ADAM8, RSU1, RAB18, MPP7, BAMBI, KIAA1462, MAP3K8, KIF5B, NRP1, FZD8, RET, SYT15, NPY4R, ARHGAP22, SGMS1, DKK1, RHOBTB1, ARID5B, EGR2, SRGN, TSPAN15, UNC5B, MCU, PLAU, ZMIZ1, TSPAN14, ANKRD1, PIK3AP1, ANKRD2, DYNC2H1, RDX, CRYAB, IL18, DKK3, GRIK4, SORL1, UBASH3B, GRAMD1B, IGSF9B, RRAS2, DUSP8, SOX6, LSP1, SV…	any
GO:0016021	integral component of membrane	GO:CC	3.73e-05	5692	408	ENSG00000107518, ENSG00000203805, ENSG00000066468, ENSG00000148848, ENSG00000165996, ENSG00000148483, ENSG00000095739, ENSG00000204176, ENSG00000204174, ENSG00000198964, ENSG00000099282, ENSG00000171224, ENSG00000107738, ENSG00000122863, ENSG00000156026, ENSG00000108219, ENSG00000152779, ENSG00000176273, ENSG00000241935, ENSG00000072952, ENSG00000204381, ENSG00000182985, ENSG00000110328, ENSG0000…	ATRNL1, PPAPDC1A, FGFR2, ADAM12, PTPLA, TMEM236, BAMBI, SYT15, NPY4R, SGMS1, TSPAN15, C10orf35, C10orf54, CHST3, MCU, TSPAN14, SLC16A12, SLC35G1, HOGA1, MRVI1, LAYN, CADM1, GALNT18, PCSK7, MPZL3, MCAM, GRIK4, SC5D, SORL1, KIRREL3, TMEM45B, TMEM86A, ANO5, LGR4, PAX6, PRRG4, TP53I11, OR51E2, LRRN4CL, GAL3ST3, TMEM151A, SLC29A2, LRP5, FOLR1, CYB5R2, RIC3, SMCO4, ANO4, CHPT1, STYK1, HRK, STX2, GSG1, …	downregulated
GO:0043269	regulation of ion transport	GO:BP	3.98e-05	711	132	ENSG00000203805, ENSG00000170759, ENSG00000204176, ENSG00000154127, ENSG00000019505, ENSG00000011347, ENSG00000124942, ENSG00000174871, ENSG00000122986, ENSG00000089250, ENSG00000151062, ENSG00000057294, ENSG00000018236, ENSG00000196876, ENSG00000185482, ENSG00000127325, ENSG00000070961, ENSG00000132932, ENSG00000102468, ENSG00000134873, ENSG00000131981, ENSG00000137801, ENSG00000080644, ENSG0000…	PPAPDC1A, KIF5B, SYT15, UBASH3B, SYT13, SYT7, AHNAK, CNIH2, HVCN1, NOS1, CACNA2D4, PKP2, CNTN1, SCN8A, STAC3, BEST3, ATP2B1, ATP8A2, HTR2A, CLDN10, LGALS3, THBS1, CHRNA3, RASGRF1, IL16, SHISA9, GSG1L, CORO1A, RRAD, ATP2C2, ABAT, KCNJ12, CCL2, TRPV3, WNK4, RGS9, CACNG4, SLC9A3R1, KCNAB3, CYP4F2, F2RL3, TGFB1, APOE, KCNJ14, CD33, CACNG7, AMIGO1, PTPN22, CHRNB2, NOS1AP, RGS4, ATP1B1, PTGS2, RGS2, SY…	any
GO:2000147	positive regulation of cell motility	GO:BP	4e-05	584	69	ENSG00000151651, ENSG00000165757, ENSG00000099250, ENSG00000165731, ENSG00000122861, ENSG00000110492, ENSG00000149781, ENSG00000176973, ENSG00000171860, ENSG00000133110, ENSG00000157227, ENSG00000131981, ENSG00000137872, ENSG00000140285, ENSG00000035664, ENSG00000166949, ENSG00000185033, ENSG00000102879, ENSG00000103490, ENSG00000140678, ENSG00000168961, ENSG00000141738, ENSG00000126561, ENSG0000…	ADAM8, KIAA1462, NRP1, RET, PLAU, MDK, FERMT3, FAM89B, C3AR1, POSTN, MMP14, LGALS3, SEMA6D, FGF7, DAPK2, SMAD3, SEMA4B, CORO1A, PYCARD, ITGAX, LGALS9, GRB7, STAT5A, SOX9, SPHK1, SERPINB3, MIR27A, MIR23A, TGFB1, SEMA6B, CSF1, TNFSF18, PTGS2, PTPRC, CYR61, RIN2, PREX1, BMP2, RAC2, MAP4K4, TNFAIP6, ITGA4, FN1, MYLK, PPP3CA, PDGFRA, IL8, TERT, CSF1R, CD74, ITGA2, VEGFA, RELN, DOCK4, IL6, CLDN4, SEMA3…	upregulated
GO:0071310	cellular response to organic substance	GO:BP	4.08e-05	2813	230	ENSG00000165757, ENSG00000099250, ENSG00000165731, ENSG00000107984, ENSG00000150347, ENSG00000122877, ENSG00000108175, ENSG00000050165, ENSG00000023171, ENSG00000185201, ENSG00000185885, ENSG00000142089, ENSG00000026508, ENSG00000185187, ENSG00000168056, ENSG00000176973, ENSG00000166340, ENSG00000062282, ENSG00000111252, ENSG00000089127, ENSG00000111335, ENSG00000089250, ENSG00000135114, ENSG0000…	KIAA1462, NRP1, RET, DKK1, ARID5B, EGR2, ZMIZ1, DKK3, GRAMD1B, IFITM2, IFITM1, IFITM3, CD44, SIGIRR, LTBP3, FAM89B, TPP1, DGAT2, SH2B3, OAS1, OAS2, NOS1, OASL, LRRK2, RAPGEF3, ACVRL1, ATP2B1, DCN, TNFSF13B, TNFRSF19, POSTN, EDNRB, IRF9, GNG2, ZFP36L1, LTBP2, FOS, RPS6KA5, GPR68, IFI27, SPINT1, FGF7, DYX1C1, SMAD3, CHRNA3, ISG20, SSTR5, CORO1A, PYCARD, ITGAX, TFAP4, MMP2, PARD6A, SERPINF1, LGALS9,…	upregulated
GO:0032940	secretion by cell	GO:BP	4.08e-05	1567	144	ENSG00000151651, ENSG00000122861, ENSG00000133805, ENSG00000198168, ENSG00000026508, ENSG00000019505, ENSG00000110492, ENSG00000149131, ENSG00000011347, ENSG00000149781, ENSG00000110076, ENSG00000122986, ENSG00000118308, ENSG00000188906, ENSG00000079337, ENSG00000111052, ENSG00000139220, ENSG00000171860, ENSG00000175899, ENSG00000102524, ENSG00000133110, ENSG00000102760, ENSG00000131981, ENSG0000…	ADAM8, PLAU, AMPD3, SVIP, CD44, SYT13, MDK, SERPING1, SYT7, FERMT3, NRXN2, HVCN1, LRMP, LRRK2, RAPGEF3, LIN7A, PPFIA2, C3AR1, A2M, TNFSF13B, POSTN, RGCC, LGALS3, LTBP2, GPR68, SERPINA1, FGF7, NOX5, ISLR, CHRNA3, NMB, ANPEP, MCTP2, SSTR5, RAB26, LAT, PRRT2, CORO1A, MMP25, STX1B, PYCARD, ITGAX, PARD6A, ADORA2B, LGALS9, ALDOC, TRPV1, NR1D1, JUP, ATP6V0A1, SEPT4, CD68, TMC6, GAA, RAB27B, SERPINB3, EM…	upregulated
GO:0008284	positive regulation of cell population proliferation	GO:BP	4.09e-05	969	169	ENSG00000198873, ENSG00000066468, ENSG00000095739, ENSG00000165757, ENSG00000099250, ENSG00000108175, ENSG00000150782, ENSG00000007372, ENSG00000110492, ENSG00000168056, ENSG00000175592, ENSG00000162337, ENSG00000139567, ENSG00000065361, ENSG00000149948, ENSG00000102524, ENSG00000183087, ENSG00000102678, ENSG00000165556, ENSG00000102755, ENSG00000102468, ENSG00000102554, ENSG00000136160, ENSG0000…	GRK5, FGFR2, BAMBI, KIAA1462, NRP1, ZMIZ1, IL18, PAX6, MDK, LTBP3, FOSL1, LRP5, ACVRL1, ERBB3, HMGA2, TNFSF13B, GAS6, FGF9, CDX2, FLT1, HTR2A, KLF5, EDNRB, CRIP2, TGM1, BMP4, LGMN, THBS1, SHC4, FGF7, NMB, IGF1R, CORO1A, PYCARD, ITGAX, MMP2, GPR56, HSF4, LGALS9, CDC6, STAT5A, GFAP, SOX9, SPHK1, TNFSF13, NTN1, GLP2R, GAREM, SERPINB3, MIR27A, MIR23A, CRLF1, TGFB1, LRG1, C5AR2, FLT3LG, IL11, VCAM1, V…	any
GO:0007167	enzyme linked receptor protein signaling pathway	GO:BP	4.14e-05	1076	184	ENSG00000151892, ENSG00000066468, ENSG00000095739, ENSG00000165757, ENSG00000099250, ENSG00000165731, ENSG00000107984, ENSG00000150347, ENSG00000108175, ENSG00000050165, ENSG00000137642, ENSG00000154127, ENSG00000176697, ENSG00000129757, ENSG00000068971, ENSG00000168056, ENSG00000176973, ENSG00000110195, ENSG00000111252, ENSG00000013588, ENSG00000139567, ENSG00000167779, ENSG00000065361, ENSG0000…	GFRA1, FGFR2, BAMBI, KIAA1462, NRP1, RET, DKK1, ARID5B, ZMIZ1, DKK3, SORL1, UBASH3B, BDNF, CDKN1C, PPP2R5B, LTBP3, FAM89B, FOLR1, SH2B3, GPRC5A, ACVRL1, IGFBP6, ERBB3, PTPRR, DCN, GAS6, FGF9, SHISA2, FLT1, SMAD9, EFS, FERMT2, BMP4, LTBP2, FOS, RPS6KA5, LGMN, BDKRB2, PCSK6, THBS1, SHC4, FGF7, SMAD3, NPTN, CHRNA3, IGF1R, MMP2, DOK4, PARD6A, GRB7, STAT5A, ATP6V0A1, DUSP3, SMURF2, SOX9, SLC9A3R1, LDL…	any
GO:0042641	actomyosin	GO:CC	4.3e-05	81	19	ENSG00000099204, ENSG00000078114, ENSG00000122367, ENSG00000136167, ENSG00000073712, ENSG00000072110, ENSG00000159251, ENSG00000140416, ENSG00000133026, ENSG00000101608, ENSG00000118680, ENSG00000105357, ENSG00000101335, ENSG00000172403, ENSG00000064042, ENSG00000196923, ENSG00000120913, ENSG00000120156, ENSG00000154330	ABLIM1, NEBL, LDB3, LCP1, FERMT2, ACTN1, ACTC1, TPM1, MYH10, MYL12A, MYL12B, MYH14, MYL9, SYNPO2, LIMCH1, PDLIM7, PDLIM2, TEK, PGM5	downregulated
GO:0099537	trans-synaptic signaling	GO:BP	4.46e-05	726	134	ENSG00000170759, ENSG00000107984, ENSG00000122877, ENSG00000122862, ENSG00000149403, ENSG00000080854, ENSG00000176697, ENSG00000148948, ENSG00000011347, ENSG00000110076, ENSG00000174871, ENSG00000174791, ENSG00000166405, ENSG00000087053, ENSG00000089250, ENSG00000060709, ENSG00000111450, ENSG00000188906, ENSG00000185482, ENSG00000155980, ENSG00000111052, ENSG00000139220, ENSG00000102468, ENSG0000…	KIF5B, DKK1, EGR2, SRGN, GRIK4, IGSF9B, BDNF, LRRC4C, SYT7, NRXN2, CNIH2, RIN1, RIC3, MTMR2, NOS1, RIMBP2, STX2, LRRK2, STAC3, KIF5A, LIN7A, PPFIA2, HTR2A, PCDH17, FARP1, BEGAIN, AKAP5, LGMN, GABRA5, GABRB3, SLC12A6, TMOD2, NPTN, C15orf59, CHRNA3, RASGRF1, MCTP2, SHISA9, RAB26, PRRT2, STX1B, ABAT, PMP22, ADORA2B, CCL2, TRPV1, MPP2, GFAP, MYCBPAP, CACNG4, GRIN2C, CDH2, GIPC1, TSHZ3, APOE, LIN7B, N…	any
GO:0001932	regulation of protein phosphorylation	GO:BP	4.49e-05	1493	241	ENSG00000138166, ENSG00000066468, ENSG00000151651, ENSG00000165757, ENSG00000107968, ENSG00000099250, ENSG00000177283, ENSG00000165731, ENSG00000107984, ENSG00000150782, ENSG00000137642, ENSG00000154127, ENSG00000184545, ENSG00000176697, ENSG00000129757, ENSG00000007372, ENSG00000026508, ENSG00000135362, ENSG00000134569, ENSG00000121236, ENSG00000068971, ENSG00000162337, ENSG00000111252, ENSG0000…	DUSP5, FGFR2, ADAM8, KIAA1462, MAP3K8, NRP1, FZD8, RET, DKK1, IL18, SORL1, UBASH3B, DUSP8, BDNF, CDKN1C, PAX6, CD44, PRR5L, LRP4, TRIM6, PPP2R5B, LRP5, SH2B3, NOS1, DUSP16, GPRC5A, PTPRO, LRRK2, CNTN1, RAPGEF3, C1QL4, ACVRL1, ERBB3, NAB2, HMGA2, PTPRR, DUSP6, GAS6, LATS2, FGF9, TNFRSF19, FLT1, RGCC, HTR2A, EDNRB, NDRG2, AJUBA, RIPK3, MBIP, BMP4, RPS6KA5, BDKRB2, THBS1, FGF7, TNFAIP8L3, NPTN, CHRN…	any
GO:0099572	postsynaptic specialization	GO:CC	4.55e-05	370	48	ENSG00000122862, ENSG00000109846, ENSG00000149403, ENSG00000087053, ENSG00000151490, ENSG00000155974, ENSG00000133083, ENSG00000179841, ENSG00000186297, ENSG00000156642, ENSG00000205363, ENSG00000140600, ENSG00000237515, ENSG00000169181, ENSG00000108852, ENSG00000108370, ENSG00000075461, ENSG00000170558, ENSG00000082397, ENSG00000104863, ENSG00000131409, ENSG00000105605, ENSG00000099864, ENSG0000…	SRGN, CRYAB, GRIK4, MTMR2, PTPRO, GRIP1, DCLK1, AKAP5, GABRA5, NPTN, C15orf59, SH3GL3, SHISA9, GSG1L, MPP2, RGS9, CACNG4, CDH2, EPB41L3, LIN7B, LRRC4B, CACNG7, PALM, DNM3, ADORA1, DISC1, DNAJC6, PDE4B, CNN3, LZTS3, BCR, NEFH, MAPK8IP2, PKP4, MAP2, ERBB4, TMEM108, ADRA2C, CAP2, NRCAM, GPER1, DGKI, PCLO, PPP1R9A, LYN, FMR1, CNKSR2, ARHGEF9	downregulated
GO:0098984	neuron to neuron synapse	GO:CC	4.64e-05	372	78	ENSG00000109846, ENSG00000149403, ENSG00000080854, ENSG00000148948, ENSG00000134569, ENSG00000011347, ENSG00000174871, ENSG00000087053, ENSG00000089250, ENSG00000151490, ENSG00000155974, ENSG00000111052, ENSG00000133083, ENSG00000178235, ENSG00000179841, ENSG00000156642, ENSG00000205363, ENSG00000080644, ENSG00000136379, ENSG00000140600, ENSG00000237515, ENSG00000169181, ENSG00000167371, ENSG0000…	CRYAB, GRIK4, IGSF9B, LRRC4C, LRP4, SYT7, CNIH2, MTMR2, NOS1, PTPRO, GRIP1, LIN7A, DCLK1, SLITRK1, AKAP5, NPTN, C15orf59, CHRNA3, ABHD17C, SH3GL3, SHISA9, GSG1L, PRRT2, RNF112, MPP2, RGS9, CACNG4, GRIN2C, CDH2, EPB41L3, LIN7B, LRRC4B, CACNG7, PALM, DNM3, ADORA1, DISC1, ACTN2, CHRM3, EPB41, KCNAB2, DNAJC6, PDE4B, CNN3, LZTS3, MX1, P2RX6, BCR, NEFH, MAPK8IP2, PKP4, MAP2, ERBB4, SLC30A3, SYN2, TMEM1…	any
GO:0031252	cell leading edge	GO:CC	4.75e-05	417	85	ENSG00000099204, ENSG00000165757, ENSG00000107796, ENSG00000137710, ENSG00000204381, ENSG00000026508, ENSG00000068831, ENSG00000176973, ENSG00000139112, ENSG00000111450, ENSG00000151490, ENSG00000139132, ENSG00000079337, ENSG00000127328, ENSG00000070961, ENSG00000132970, ENSG00000136167, ENSG00000129474, ENSG00000073712, ENSG00000179841, ENSG00000072110, ENSG00000186297, ENSG00000159251, ENSG0000…	ABLIM1, KIAA1462, ACTA2, RDX, LAYN, CD44, RASGRP2, FAM89B, GABARAPL1, STX2, PTPRO, FGD4, RAPGEF3, RAB3IP, ATP2B1, WASF3, LCP1, AJUBA, FERMT2, AKAP5, ACTN1, GABRA5, ACTC1, TPM1, SHISA9, CORO1A, PARD6A, TUBB3, TRPV1, MPP2, SLC9A3R1, MYH10, CDH2, EPB41L3, PTPRM, HMHA1, EMR2, PALM, PDPN, PIP5K1A, RAB13, ARPC5, ADORA1, ITSN1, INPP5J, RAC2, EPB41L5, ARHGEF4, DPP4, FAP, KLHL41, WIPF1, DYSF, MYLK, FRMD4B…	any
GO:0032279	asymmetric synapse	GO:CC	4.76e-05	348	46	ENSG00000109846, ENSG00000149403, ENSG00000087053, ENSG00000151490, ENSG00000155974, ENSG00000133083, ENSG00000179841, ENSG00000156642, ENSG00000205363, ENSG00000140600, ENSG00000237515, ENSG00000169181, ENSG00000108852, ENSG00000108370, ENSG00000075461, ENSG00000170558, ENSG00000082397, ENSG00000104863, ENSG00000131409, ENSG00000105605, ENSG00000099864, ENSG00000197959, ENSG00000163485, ENSG0000…	CRYAB, GRIK4, MTMR2, PTPRO, GRIP1, DCLK1, AKAP5, NPTN, C15orf59, SH3GL3, SHISA9, GSG1L, MPP2, RGS9, CACNG4, CDH2, EPB41L3, LIN7B, LRRC4B, CACNG7, PALM, DNM3, ADORA1, DISC1, DNAJC6, PDE4B, CNN3, LZTS3, BCR, NEFH, MAPK8IP2, PKP4, MAP2, ERBB4, TMEM108, ADRA2C, CAP2, NRCAM, GPER1, DGKI, PCLO, PPP1R9A, LYN, FMR1, CNKSR2, ARHGEF9	downregulated
GO:0051960	regulation of nervous system development	GO:BP	4.76e-05	963	99	ENSG00000148803, ENSG00000099250, ENSG00000165731, ENSG00000107984, ENSG00000148948, ENSG00000110492, ENSG00000134569, ENSG00000124920, ENSG00000089250, ENSG00000123095, ENSG00000188906, ENSG00000135407, ENSG00000139220, ENSG00000136160, ENSG00000178235, ENSG00000184564, ENSG00000183098, ENSG00000166145, ENSG00000137872, ENSG00000080644, ENSG00000185033, ENSG00000099365, ENSG00000140678, ENSG0000…	FUOM, NRP1, RET, DKK1, LRRC4C, MDK, LRP4, MYRF, NOS1, BHLHE41, LRRK2, AVIL, PPFIA2, EDNRB, SLITRK1, SLITRK6, GPC6, SPINT1, SEMA6D, CHRNA3, SEMA4B, STX1B, ITGAX, IRX3, GPR56, SCARF1, SERPINF1, RNF112, OMG, NR1D1, GFAP, MMD, SOX9, HES7, CBLN2, TGFB1, SEMA6B, CSF1, DRAXIN, TNFRSF1B, CHRNB2, TRIM46, PBX1, PRRX1, RGS2, SYT2, TP73, GDF5, PREX1, BMP2, CELSR1, RFX8, MAP4K4, FN1, SERPINE2, PER2, FKBP1B, P…	upregulated
GO:0098631	cell adhesion mediator activity	GO:MF	4.77e-05	60	23	ENSG00000138347, ENSG00000137699, ENSG00000149564, ENSG00000154133, ENSG00000184363, ENSG00000148948, ENSG00000057294, ENSG00000168952, ENSG00000186417, ENSG00000138594, ENSG00000156642, ENSG00000173801, ENSG00000046604, ENSG00000187244, ENSG00000162631, ENSG00000143127, ENSG00000162614, ENSG00000117519, ENSG00000138080, ENSG00000144619, ENSG00000170571, ENSG00000164171, ENSG00000091129	MYPN, TRIM29, ESAM, ROBO4, PKP3, LRRC4C, PKP2, STXBP6, GLDN, TMOD3, NPTN, JUP, DSG2, BCAM, NTNG1, ITGA10, NEXN, CNN3, EMILIN1, CNTN4, EMB, ITGA2, NRCAM	any
GO:0042734	presynaptic membrane	GO:CC	4.93e-05	157	42	ENSG00000149403, ENSG00000011347, ENSG00000175592, ENSG00000149972, ENSG00000111450, ENSG00000018236, ENSG00000070961, ENSG00000102468, ENSG00000118946, ENSG00000178695, ENSG00000186297, ENSG00000156642, ENSG00000167371, ENSG00000099365, ENSG00000170558, ENSG00000131409, ENSG00000162631, ENSG00000160716, ENSG00000163485, ENSG00000133019, ENSG00000136531, ENSG00000178568, ENSG00000179915, ENSG0000…	GRIK4, SYT7, FOSL1, CNTN5, STX2, CNTN1, ATP2B1, HTR2A, PCDH17, KCTD12, GABRA5, NPTN, PRRT2, STX1B, CDH2, LRRC4B, NTNG1, CHRNB2, ADORA1, CHRM3, SCN2A, ERBB4, NRXN1, P2RY1, ERC2, SNCAIP, KCTD16, CLTB, CDH10, CDH9, IL31RA, STX11, RIMS1, SNAP91, GPER1, CADPS2, DGKI, STX1A, RIMS2, APBA1, GPC4, FMR1	any
GO:0030424	axon	GO:CC	5.16e-05	647	71	ENSG00000170759, ENSG00000109846, ENSG00000149571, ENSG00000176697, ENSG00000087053, ENSG00000151490, ENSG00000111371, ENSG00000196876, ENSG00000102468, ENSG00000165795, ENSG00000072415, ENSG00000139985, ENSG00000128872, ENSG00000156642, ENSG00000058335, ENSG00000140443, ENSG00000133026, ENSG00000082397, ENSG00000167654, ENSG00000105357, ENSG00000131409, ENSG00000105605, ENSG00000099864, ENSG0000…	KIF5B, CRYAB, KIRREL3, BDNF, MTMR2, PTPRO, SLC38A1, SCN8A, HTR2A, NDRG2, MPP5, ADAM21, TMOD2, NPTN, RASGRF1, IGF1R, MYH10, EPB41L3, ATCAY, MYH14, LRRC4B, CACNG7, PALM, AMIGO1, NGF, DNM3, NMNAT2, ARPC5, ADORA1, TGFB2, CCSAP, DISC1, LDLRAP1, NEXN, ITSN1, RTN4R, BCR, NEFH, INPP5J, SCN3A, SCN9A, LRP2, GAD1, MAP2, NGEF, KIF1A, NRXN1, TMEM108, KCNAB1, CNTN4, ERC2, ROBO2, PRSS12, ADRA2C, NMU, EMB, IL31R…	downregulated
GO:0061061	muscle structure development	GO:BP	5.23e-05	683	76	ENSG00000066468, ENSG00000148848, ENSG00000078114, ENSG00000122367, ENSG00000148677, ENSG00000095587, ENSG00000165887, ENSG00000109846, ENSG00000150782, ENSG00000149591, ENSG00000110693, ENSG00000176697, ENSG00000110047, ENSG00000057294, ENSG00000065361, ENSG00000196465, ENSG00000092841, ENSG00000102678, ENSG00000102554, ENSG00000165410, ENSG00000125378, ENSG00000159251, ENSG00000128872, ENSG0000…	FGFR2, ADAM12, NEBL, LDB3, ANKRD1, TLL2, ANKRD2, CRYAB, IL18, TAGLN, SOX6, BDNF, EHD1, PKP2, ERBB3, MYL6B, MYL6, FGF9, KLF5, CFL2, BMP4, ACTC1, TMOD2, TMOD3, TPM1, ALPK3, NR2F2, NUPR1, NKD1, MYH3, MYH10, CDH2, MYOM1, FHOD3, ALPK2, OLFM2, MYH14, COL11A1, SORT1, PTGFRN, TNNT2, TNNI1, CSRP1, LMOD1, TGFB2, AGT, ZBTB18, JPH2, RCAN1, LARGE, LRP2, ERBB4, SLC8A1, DYSF, MRAS, KCNAB1, TNNC1, SFMBT1, WNT5A,…	downregulated
GO:0006935	chemotaxis	GO:BP	5.39e-05	649	74	ENSG00000151892, ENSG00000151651, ENSG00000099250, ENSG00000165731, ENSG00000122877, ENSG00000138347, ENSG00000107731, ENSG00000122861, ENSG00000154133, ENSG00000110492, ENSG00000175592, ENSG00000155980, ENSG00000171860, ENSG00000136160, ENSG00000125245, ENSG00000131981, ENSG00000100784, ENSG00000137872, ENSG00000140285, ENSG00000035664, ENSG00000166949, ENSG00000185033, ENSG00000102879, ENSG0000…	GFRA1, ADAM8, NRP1, RET, EGR2, MYPN, UNC5B, PLAU, ROBO4, MDK, FOSL1, KIF5A, C3AR1, EDNRB, GPR18, LGALS3, RPS6KA5, SEMA6D, FGF7, DAPK2, SMAD3, SEMA4B, CORO1A, HSD3B7, TUBB3, TUBB3, LGALS9, CCL2, GRB7, EMR2, SEMA6B, C5AR2, VAV3, CSF1, DRAXIN, RAB13, SHC1, FCER1G, LHX9, CYR61, PREX1, RAC2, KIF5C, DPP4, TMEFF2, SCG2, BOC, SUCNR1, PDGFRA, IL8, BMPR1B, UNC5C, CSF1R, CD74, ITGA2, PDE4D, LAMA2, VEGFA, RE…	upregulated
GO:0032989	cellular component morphogenesis	GO:BP	5.41e-05	1177	115	ENSG00000107554, ENSG00000151892, ENSG00000151651, ENSG00000099250, ENSG00000165731, ENSG00000107984, ENSG00000165471, ENSG00000122877, ENSG00000138347, ENSG00000107731, ENSG00000154133, ENSG00000026508, ENSG00000148948, ENSG00000110492, ENSG00000134569, ENSG00000149781, ENSG00000188906, ENSG00000161791, ENSG00000139626, ENSG00000135424, ENSG00000155980, ENSG00000139220, ENSG00000133110, ENSG0000…	DNMBP, GFRA1, ADAM8, NRP1, RET, DKK1, MBL2, EGR2, MYPN, UNC5B, ROBO4, CD44, LRRC4C, MDK, LRP4, FERMT3, LRRK2, FMNL3, ITGB7, ITGA7, KIF5A, PPFIA2, POSTN, SLITRK1, SLITRK6, RPS6KA5, SYNE3, SEMA6D, CHRNA3, SEMA4B, CORO1A, TUBB3, TUBB3, OMG, CCL2, GRB7, FMNL1, SEMA6B, CDC42EP5, NTNG1, DRAXIN, VWA1, CHRNB2, SHC1, TRIM46, NES, LHX9, SYT2, LAMB3, ACTN2, EPB41, PREX1, COL6A1, COL6A2, RAC2, MAP4K4, MERTK,…	upregulated
GO:0007409	axonogenesis	GO:BP	5.46e-05	487	98	ENSG00000151892, ENSG00000066468, ENSG00000170759, ENSG00000099250, ENSG00000165731, ENSG00000122877, ENSG00000138347, ENSG00000107731, ENSG00000154133, ENSG00000176697, ENSG00000007372, ENSG00000148948, ENSG00000134569, ENSG00000151490, ENSG00000155980, ENSG00000074527, ENSG00000132932, ENSG00000133083, ENSG00000178235, ENSG00000184564, ENSG00000070182, ENSG00000100784, ENSG00000137872, ENSG0000…	GFRA1, FGFR2, KIF5B, NRP1, RET, EGR2, MYPN, UNC5B, ROBO4, BDNF, PAX6, LRRC4C, LRP4, PTPRO, KIF5A, NTN4, ATP8A2, DCLK1, SLITRK1, SLITRK6, SPTB, RPS6KA5, SEMA6D, NPTN, SEMA4B, DOK4, TUBB3, TUBB3, ULK2, OMG, GRB7, MYH10, NTN1, CDH2, PTPRM, APOE, SEMA6B, LRRC4B, NTNG1, AMIGO1, NGF, DRAXIN, CHRNB2, SHC1, EFNA1, TRIM46, LHX9, DISC1, NEXN, PARD6B, DOK5, RTN4R, NEFH, RAC2, GLI2, KIF5C, NR4A2, CHN1, ITGA4…	any
GO:0042221	response to chemical	GO:BP	5.47e-05	4897	672	ENSG00000099194, ENSG00000065621, ENSG00000151892, ENSG00000066468, ENSG00000170430, ENSG00000151640, ENSG00000151651, ENSG00000107611, ENSG00000095739, ENSG00000165757, ENSG00000107968, ENSG00000170759, ENSG00000099250, ENSG00000165731, ENSG00000204176, ENSG00000198964, ENSG00000107984, ENSG00000150347, ENSG00000122877, ENSG00000138347, ENSG00000107731, ENSG00000156026, ENSG00000122861, ENSG0000…	SCD, GSTO2, GFRA1, FGFR2, MGMT, DPYSL4, ADAM8, CUBN, BAMBI, KIAA1462, MAP3K8, KIF5B, NRP1, RET, SYT15, SGMS1, DKK1, ARID5B, EGR2, MYPN, UNC5B, MCU, PLAU, ZMIZ1, RNLS, SLC16A12, ANKRD1, ANKRD2, MMP13, RDX, HSPB2, CRYAB, IL18, DKK3, SORL1, GRAMD1B, ROBO4, SOX6, SVIP, FIBIN, LGR4, BDNF, CDKN1C, IFITM2, IFITM1, PAX6, IFITM3, ABTB2, CD44, PRR5L, SIGIRR, SYT13, MDK, OR51E2, HBE1, AC104389.28, TRIM6, HB…	any
GO:0060485	mesenchyme development	GO:BP	5.68e-05	280	65	ENSG00000066468, ENSG00000095739, ENSG00000099250, ENSG00000165731, ENSG00000107796, ENSG00000110492, ENSG00000166341, ENSG00000110195, ENSG00000139567, ENSG00000065361, ENSG00000149948, ENSG00000102678, ENSG00000102760, ENSG00000136160, ENSG00000125378, ENSG00000185650, ENSG00000159251, ENSG00000137872, ENSG00000166949, ENSG00000185033, ENSG00000183688, ENSG00000168646, ENSG00000125398, ENSG0000…	FGFR2, BAMBI, NRP1, RET, ACTA2, MDK, DCHS1, FOLR1, ACVRL1, ERBB3, HMGA2, FGF9, RGCC, EDNRB, BMP4, ZFP36L1, ACTC1, SEMA6D, SMAD3, SEMA4B, FAM101B, AXIN2, SOX9, LDLRAD4, SERPINB3, DLL3, TGFB1, SEMA6B, DACT3, PDPN, S100A4, EFNA1, TGFB2, FOXA2, BMP2, EPB41L5, FRZB, ERBB4, FN1, WWTR1, SEMA3B, WNT5A, ROBO2, EDNRA, MSX2, EDN1, RBM24, BMP5, IL6, SEMA3C, HGF, SEMA3E, SEMA3A, SEMA3D, ZFPM2, HAS2, MYC, ZNF7…	any
GO:0009888	tissue development	GO:BP	5.79e-05	2118	180	ENSG00000107518, ENSG00000066468, ENSG00000170430, ENSG00000078114, ENSG00000095739, ENSG00000122862, ENSG00000107796, ENSG00000148677, ENSG00000095587, ENSG00000165887, ENSG00000137710, ENSG00000149591, ENSG00000137642, ENSG00000110693, ENSG00000205213, ENSG00000176697, ENSG00000007372, ENSG00000184363, ENSG00000175315, ENSG00000162337, ENSG00000110195, ENSG00000198431, ENSG00000111450, ENSG0000…	ATRNL1, FGFR2, MGMT, NEBL, BAMBI, SRGN, ACTA2, ANKRD1, TLL2, ANKRD2, RDX, TAGLN, SORL1, SOX6, LGR4, BDNF, PAX6, PKP3, CST6, LRP5, FOLR1, TXNRD1, STX2, MGP, PTPRO, PKP2, KRT80, KRT86, KRT81, HOXC13, ERBB3, MYL6B, MYL6, PTPRQ, NTN4, GAS6, FGF9, CDX2, KLF5, SCEL, AJUBA, TGM1, CFL2, BMP4, MPP5, PCSK6, TJP1, ACTC1, TPM1, ALPK3, ACAN, NR2F2, NUPR1, NKD1, MMP15, FAM101B, KRTAP2-3, KRT34, SMURF2, AXIN2, …	downregulated
GO:0032879	regulation of localization	GO:BP	5.79e-05	2942	235	ENSG00000203805, ENSG00000170759, ENSG00000204176, ENSG00000072422, ENSG00000122862, ENSG00000107738, ENSG00000156026, ENSG00000148677, ENSG00000137710, ENSG00000109846, ENSG00000182985, ENSG00000076706, ENSG00000137699, ENSG00000137642, ENSG00000154127, ENSG00000133818, ENSG00000205213, ENSG00000176697, ENSG00000007372, ENSG00000135362, ENSG00000167332, ENSG00000121236, ENSG00000110047, ENSG0000…	PPAPDC1A, KIF5B, SYT15, RHOBTB1, SRGN, C10orf54, MCU, ANKRD1, RDX, CRYAB, CADM1, MCAM, TRIM29, SORL1, UBASH3B, RRAS2, LGR4, BDNF, PAX6, PRR5L, OR51E2, TRIM6, EHD1, LRP5, MTMR2, CRY1, PTPRO, C12orf39, DENND5B, PKP2, CNTN1, SCN8A, ERBB3, BEST3, PTPRR, GAS6, FGF9, ATP8A2, FLT1, DCLK1, LCP1, HTR2A, PCDH17, NDFIP2, AJUBA, STXBP6, BMP4, AKAP5, ACTN1, LGMN, TJP1, THBS1, PLCB2, SLC30A4, TPM1, NPTN, RASGR…	downregulated
GO:0042995	cell projection	GO:CC	5.94e-05	2288	189	ENSG00000120051, ENSG00000099204, ENSG00000170759, ENSG00000122367, ENSG00000107796, ENSG00000137710, ENSG00000204381, ENSG00000109846, ENSG00000149571, ENSG00000176697, ENSG00000068831, ENSG00000110047, ENSG00000110195, ENSG00000166405, ENSG00000087053, ENSG00000139112, ENSG00000158023, ENSG00000111450, ENSG00000151490, ENSG00000139132, ENSG00000111371, ENSG00000196876, ENSG00000047617, ENSG0000…	CCDC147, ABLIM1, KIF5B, LDB3, ACTA2, RDX, LAYN, CRYAB, KIRREL3, BDNF, RASGRP2, EHD1, FOLR1, RIC3, MTMR2, GABARAPL1, WDR66, STX2, PTPRO, FGD4, SLC38A1, SCN8A, ANO2, GRIP1, RAB3IP, TPH2, ATP8A2, WASF3, LCP1, HTR2A, KCTD12, FARP1, NDRG2, AJUBA, FERMT2, SAMD4A, GCH1, AKAP5, MPP5, ACTN1, ADAM21, GABRA5, GABRB3, TJP1, ACTC1, TMOD2, TPM1, NPTN, RASGRF1, IGF1R, SHISA9, GNAO1, ABAT, PLXDC1, MPP2, PITPNM3,…	downregulated
GO:0048812	neuron projection morphogenesis	GO:BP	6.1e-05	673	75	ENSG00000066468, ENSG00000151640, ENSG00000170759, ENSG00000149571, ENSG00000176697, ENSG00000007372, ENSG00000151490, ENSG00000155974, ENSG00000074527, ENSG00000041515, ENSG00000132932, ENSG00000133083, ENSG00000152767, ENSG00000070182, ENSG00000156642, ENSG00000125170, ENSG00000083290, ENSG00000133026, ENSG00000065320, ENSG00000170558, ENSG00000082397, ENSG00000173482, ENSG00000130203, ENSG0000…	FGFR2, DPYSL4, KIF5B, KIRREL3, BDNF, PAX6, PTPRO, GRIP1, NTN4, MYO16, ATP8A2, DCLK1, FARP1, SPTB, NPTN, DOK4, ULK2, MYH10, NTN1, CDH2, EPB41L3, PTPRM, APOE, LRRC4B, CACNG7, CELSR2, AMIGO1, NGF, EFNA1, DNM3, DISC1, NEXN, LZTS3, PARD6B, DOK5, RTN4R, NEFH, MAPK8IP2, GLI2, LRP2, CHN1, MAP2, NYAP2, NGEF, KIF1A, NRXN1, KALRN, TMEM108, CNTN4, CELSR3, SEMA3B, WNT5A, ROBO2, PDLIM7, EMB, DYNLT1, EZR, TUBB2…	downregulated
GO:0022407	regulation of cell-cell adhesion	GO:BP	6.11e-05	426	55	ENSG00000151651, ENSG00000108175, ENSG00000026508, ENSG00000110492, ENSG00000149781, ENSG00000111252, ENSG00000135426, ENSG00000102524, ENSG00000102760, ENSG00000131981, ENSG00000102879, ENSG00000103490, ENSG00000168961, ENSG00000108691, ENSG00000207808, ENSG00000105329, ENSG00000079385, ENSG00000162692, ENSG00000134242, ENSG00000075945, ENSG00000117586, ENSG00000081237, ENSG00000060656, ENSG0000…	ADAM8, ZMIZ1, CD44, MDK, FERMT3, SH2B3, TESPA1, TNFSF13B, RGCC, LGALS3, CORO1A, PYCARD, LGALS9, CCL2, MIR27A, TGFB1, CEACAM1, VCAM1, PTPN22, KIFAP3, TNFSF4, PTPRC, PTPRU, IL23R, BCL10, FOXA2, ADA, BMP2, DPP4, ITGA4, SERPINE2, NFKBIZ, BCL6, FGB, FGG, MEGF10, IRF1, CD74, IL7R, MYB, HLA-DRB1, HLA-DMB, HLA-DPA1, VEGFA, EPHB6, IL6, HAS2, ZNF703, IDO1, IL7, KLF4, ASS1, JAK2, MIR221, EFNB1	upregulated
GO:0042330	taxis	GO:BP	6.14e-05	651	74	ENSG00000151892, ENSG00000151651, ENSG00000099250, ENSG00000165731, ENSG00000122877, ENSG00000138347, ENSG00000107731, ENSG00000122861, ENSG00000154133, ENSG00000110492, ENSG00000175592, ENSG00000155980, ENSG00000171860, ENSG00000136160, ENSG00000125245, ENSG00000131981, ENSG00000100784, ENSG00000137872, ENSG00000140285, ENSG00000035664, ENSG00000166949, ENSG00000185033, ENSG00000102879, ENSG0000…	GFRA1, ADAM8, NRP1, RET, EGR2, MYPN, UNC5B, PLAU, ROBO4, MDK, FOSL1, KIF5A, C3AR1, EDNRB, GPR18, LGALS3, RPS6KA5, SEMA6D, FGF7, DAPK2, SMAD3, SEMA4B, CORO1A, HSD3B7, TUBB3, TUBB3, LGALS9, CCL2, GRB7, EMR2, SEMA6B, C5AR2, VAV3, CSF1, DRAXIN, RAB13, SHC1, FCER1G, LHX9, CYR61, PREX1, RAC2, KIF5C, DPP4, TMEFF2, SCG2, BOC, SUCNR1, PDGFRA, IL8, BMPR1B, UNC5C, CSF1R, CD74, ITGA2, PDE4D, LAMA2, VEGFA, RE…	upregulated
GO:0030054	cell junction	GO:CC	6.52e-05	1327	122	ENSG00000107554, ENSG00000165757, ENSG00000099250, ENSG00000170324, ENSG00000128805, ENSG00000122861, ENSG00000166250, ENSG00000149564, ENSG00000080854, ENSG00000026508, ENSG00000148948, ENSG00000011347, ENSG00000124942, ENSG00000149781, ENSG00000174871, ENSG00000149260, ENSG00000089250, ENSG00000060709, ENSG00000188906, ENSG00000170545, ENSG00000139626, ENSG00000008323, ENSG00000111052, ENSG0000…	DNMBP, KIAA1462, NRP1, FRMPD2, ARHGAP22, PLAU, CLMP, ESAM, IGSF9B, CD44, LRRC4C, SYT7, AHNAK, FERMT3, CNIH2, CAPN5, NOS1, RIMBP2, LRRK2, SMAGP, ITGB7, PLEKHG6, LIN7A, ATP2B1, PCDH9, SLITRK1, CLDN10, MMP14, FMN1, SHC4, CHRNA3, ABHD17C, LAT, PRRT2, CORO1A, PPL, FHOD1, PARD6A, RNF112, TRPV1, GRB7, NR1D1, JUP, WNK4, GRIN2C, SPHK1, CEACAM1, SLC6A17, RAB13, CHRNB2, PTPRC, SYT2, CNIH3, KCNK1, ACTN2, CHR…	upregulated
GO:0050793	regulation of developmental process	GO:BP	6.6e-05	2779	224	ENSG00000066468, ENSG00000019995, ENSG00000148848, ENSG00000095739, ENSG00000072422, ENSG00000122862, ENSG00000107738, ENSG00000156026, ENSG00000148677, ENSG00000095587, ENSG00000165887, ENSG00000137710, ENSG00000150782, ENSG00000137642, ENSG00000154127, ENSG00000110693, ENSG00000109854, ENSG00000205213, ENSG00000176697, ENSG00000007372, ENSG00000121236, ENSG00000110047, ENSG00000068971, ENSG0000…	FGFR2, ZRANB1, ADAM12, BAMBI, RHOBTB1, SRGN, C10orf54, MCU, ANKRD1, TLL2, ANKRD2, RDX, IL18, SORL1, UBASH3B, SOX6, HTATIP2, LGR4, BDNF, PAX6, TRIM6, EHD1, PPP2R5B, LRP5, MTMR2, NUAK1, MGP, PTPRO, FGD4, PKP2, CNTN1, ERBB3, GRIP1, PAWR, NTN4, GAS6, LATS2, FGF9, ATP8A2, WASF3, CDX2, FLT1, HTR2A, KLF5, FARP1, FERMT2, BMP4, JDP2, LGMN, ATP10A, TJP1, THBS1, TPM1, NPTN, SH3GL3, GPRC5B, NUPR1, NKD1, PMP2…	downregulated
GO:0005102	signaling receptor binding	GO:MF	6.96e-05	1638	258	ENSG00000151892, ENSG00000095739, ENSG00000177283, ENSG00000107984, ENSG00000165471, ENSG00000155629, ENSG00000150782, ENSG00000182985, ENSG00000050165, ENSG00000176697, ENSG00000110492, ENSG00000134569, ENSG00000149781, ENSG00000110076, ENSG00000177595, ENSG00000166405, ENSG00000139112, ENSG00000008405, ENSG00000111252, ENSG00000135114, ENSG00000134548, ENSG00000167779, ENSG00000139626, ENSG0000…	GFRA1, BAMBI, FZD8, DKK1, MBL2, PIK3AP1, IL18, CADM1, DKK3, BDNF, MDK, LRP4, FERMT3, NRXN2, PIDD, RIC3, GABARAPL1, CRY1, SH2B3, OASL, C12orf39, IGFBP6, ITGB7, TESPA1, GRIP1, TSPAN8, A2M, TNFSF13B, GAS6, FGF9, LCP1, EDNRB, MMP14, BMP4, LGALS3, AKAP5, ACTN1, BDKRB2, GABRA5, THBS1, SEMA6D, SHC4, FGF7, DYX1C1, SMAD3, NPTN, RASGRF1, IL16, NMB, SEMA4B, IGF1R, GPRC5B, STX1B, PYCARD, ITGAX, GNAO1, TUBB3,…	any
GO:0031344	regulation of cell projection organization	GO:BP	7.12e-05	704	130	ENSG00000099250, ENSG00000165731, ENSG00000107984, ENSG00000148677, ENSG00000137710, ENSG00000176697, ENSG00000026508, ENSG00000148948, ENSG00000110492, ENSG00000134569, ENSG00000110047, ENSG00000068971, ENSG00000151490, ENSG00000188906, ENSG00000018236, ENSG00000135407, ENSG00000155974, ENSG00000139220, ENSG00000132932, ENSG00000102554, ENSG00000178235, ENSG00000137872, ENSG00000156642, ENSG0000…	NRP1, RET, DKK1, ANKRD1, RDX, BDNF, CD44, LRRC4C, MDK, LRP4, EHD1, PPP2R5B, PTPRO, LRRK2, CNTN1, AVIL, GRIP1, PPFIA2, ATP8A2, KLF5, SLITRK1, SEMA6D, NPTN, CHRNA3, SEMA4B, STX1B, PMP22, SCARF1, SERPINF1, ULK2, OMG, GFAP, NTN1, CDH2, APOE, SEMA6B, LRRC4B, CACNG7, CDC42EP5, PALM, EVI5L, AMIGO1, NGF, DRAXIN, PDPN, CHRNB2, EFNA1, TRIM46, PRRX1, DNM3, RGS2, SYT2, AGT, DISC1, NEGR1, LZTS3, PREX1, ITSN1,…	any
GO:0060348	bone development	GO:BP	7.32e-05	224	36	ENSG00000165471, ENSG00000137745, ENSG00000151702, ENSG00000168056, ENSG00000166341, ENSG00000111252, ENSG00000166886, ENSG00000157227, ENSG00000119714, ENSG00000183018, ENSG00000182742, ENSG00000125398, ENSG00000197046, ENSG00000102575, ENSG00000105329, ENSG00000179403, ENSG00000169231, ENSG00000242252, ENSG00000081237, ENSG00000125845, ENSG00000142156, ENSG00000142173, ENSG00000138386, ENSG0000…	MBL2, MMP13, FLI1, LTBP3, DCHS1, SH2B3, NAB2, MMP14, GPR68, SPNS2, HOXB4, SOX9, SIGLEC15, ACP5, TGFB1, VWA1, THBS3, BGLAP, PTPRC, BMP2, COL6A1, COL6A2, NAB1, COL6A3, IFT172, RARB, SMAD1, BMPR1B, GJA1, FAM20C, HAS2, CSGALNACT1, STC1, SULF1, COL27A1, BGN	upregulated
GO:0051015	actin filament binding	GO:MF	7.54e-05	196	49	ENSG00000099204, ENSG00000078114, ENSG00000149591, ENSG00000161791, ENSG00000135407, ENSG00000041515, ENSG00000136167, ENSG00000129474, ENSG00000165410, ENSG00000073712, ENSG00000070182, ENSG00000072110, ENSG00000165959, ENSG00000176438, ENSG00000140416, ENSG00000102879, ENSG00000103187, ENSG00000133020, ENSG00000109061, ENSG00000125414, ENSG00000109063, ENSG00000167549, ENSG00000184922, ENSG0000…	ABLIM1, NEBL, TAGLN, FMNL3, AVIL, MYO16, LCP1, AJUBA, CFL2, FERMT2, SPTB, ACTN1, CLMN, SYNE3, TPM1, CORO1A, COTL1, MYH8, MYH1, MYH2, MYH3, CORO6, FMNL1, FSCN2, MYH10, MYOM1, MYH14, CAMSAP3, RCSD1, ARPC5, ACTN2, NEXN, DSTN, MYO7B, FMNL2, ERMN, XIRP2, WIPF1, SSFA2, ESPNL, MYH15, PLS1, TNNC1, IQGAP2, EZR, PPP1R9A, AIF1L, TPM2, SHROOM2	any
GO:0045596	negative regulation of cell differentiation	GO:BP	7.76e-05	767	139	ENSG00000148803, ENSG00000099250, ENSG00000107984, ENSG00000165887, ENSG00000150782, ENSG00000137642, ENSG00000154127, ENSG00000110693, ENSG00000176697, ENSG00000007372, ENSG00000110492, ENSG00000134569, ENSG00000121236, ENSG00000168056, ENSG00000162337, ENSG00000151490, ENSG00000123095, ENSG00000057294, ENSG00000188906, ENSG00000186897, ENSG00000139567, ENSG00000102678, ENSG00000133110, ENSG0000…	FUOM, NRP1, DKK1, ANKRD2, IL18, SORL1, UBASH3B, SOX6, BDNF, PAX6, MDK, LRP4, TRIM6, LTBP3, LRP5, PTPRO, BHLHE41, PKP2, LRRK2, C1QL4, ACVRL1, FGF9, POSTN, EDNRB, BMP4, ZFP36L1, JDP2, GPR68, SEMA6D, SMAD3, SEMA4B, STX1B, IRX3, GPR56, PMP22, ULK2, FAM101B, OMG, TRPV1, NR1D1, GFAP, AXIN2, ABCA5, SOX9, NTN1, LDLRAD4, TWSG1, ZFP36, DLL3, TGFB1, CEACAM1, APOE, SEMA6B, DACT3, FSTL3, SORT1, DRAXIN, EFNA1,…	any
GO:0030030	cell projection organization	GO:BP	7.83e-05	1578	142	ENSG00000099204, ENSG00000066468, ENSG00000151640, ENSG00000170759, ENSG00000148677, ENSG00000137710, ENSG00000149571, ENSG00000176697, ENSG00000007372, ENSG00000110047, ENSG00000068971, ENSG00000110195, ENSG00000087053, ENSG00000135127, ENSG00000151490, ENSG00000139132, ENSG00000173208, ENSG00000018236, ENSG00000155974, ENSG00000127328, ENSG00000074527, ENSG00000041515, ENSG00000132932, ENSG0000…	ABLIM1, FGFR2, DPYSL4, KIF5B, ANKRD1, RDX, KIRREL3, BDNF, PAX6, EHD1, PPP2R5B, FOLR1, MTMR2, CCDC64, PTPRO, FGD4, ABCD2, CNTN1, GRIP1, RAB3IP, NTN4, MYO16, ATP8A2, WASF3, FRY, DCLK1, KLF5, FARP1, AJUBA, SPTB, LGMN, CLMN, TPM1, NPTN, RASGRF1, IGF1R, DOK4, PMP22, ULK2, SLC9A3R1, MYH10, NTN1, CDH2, EPB41L3, PTPRM, WTIP, ATCAY, APOE, LRRC4B, CACNG7, PALM, CAMSAP3, EVI5L, CELSR2, AMIGO1, TSPAN2, NGF, …	downregulated
GO:0016020	membrane	GO:CC	7.9e-05	9731	645	ENSG00000107518, ENSG00000198873, ENSG00000203805, ENSG00000066468, ENSG00000148848, ENSG00000170430, ENSG00000068383, ENSG00000165996, ENSG00000148483, ENSG00000099246, ENSG00000150054, ENSG00000095739, ENSG00000170759, ENSG00000204176, ENSG00000204174, ENSG00000198964, ENSG00000072422, ENSG00000099282, ENSG00000171224, ENSG00000107738, ENSG00000122863, ENSG00000156026, ENSG00000108219, ENSG0000…	ATRNL1, GRK5, PPAPDC1A, FGFR2, ADAM12, MGMT, INPP5A, PTPLA, TMEM236, RAB18, MPP7, BAMBI, KIF5B, SYT15, NPY4R, SGMS1, RHOBTB1, TSPAN15, C10orf35, C10orf54, CHST3, MCU, TSPAN14, SLC16A12, SLC35G1, PIK3AP1, HOGA1, RNF141, MRVI1, RDX, LAYN, CRYAB, CADM1, GALNT18, PCSK7, MPZL3, MCAM, GRIK4, SC5D, SORL1, KIRREL3, TMEM45B, RRAS2, TMEM86A, HTATIP2, ANO5, LGR4, PAX6, PRRG4, PKP3, TP53I11, OR51E2, LRRN4CL,…	downregulated
GO:0006810	transport	GO:BP	8.02e-05	5337	724	ENSG00000108018, ENSG00000203805, ENSG00000187908, ENSG00000151651, ENSG00000107611, ENSG00000099246, ENSG00000170759, ENSG00000099250, ENSG00000204176, ENSG00000107984, ENSG00000165471, ENSG00000122877, ENSG00000122862, ENSG00000156026, ENSG00000122861, ENSG00000108219, ENSG00000152779, ENSG00000148677, ENSG00000176273, ENSG00000108239, ENSG00000187240, ENSG00000133805, ENSG00000137710, ENSG0000…	SORCS1, PPAPDC1A, DMBT1, ADAM8, CUBN, RAB18, KIF5B, NRP1, SYT15, DKK1, MBL2, EGR2, SRGN, MCU, PLAU, TSPAN14, SLC16A12, ANKRD1, SLC35G1, TBC1D12, DYNC2H1, AMPD3, RDX, CRYAB, CADM1, GRIK4, SORL1, UBASH3B, GRAMD1B, SLC37A2, HTATIP2, ANO5, SVIP, LGR4, BDNF, CD44, PRR5L, SYT13, MDK, LRP4, OR51E2, HBE1, TRIM6, HBG2, SERPING1, SYT7, AHNAK, FERMT3, NRXN2, EHD1, CNIH2, RIN1, SLC29A2, LRP5, FOLR1, CYB5R2, …	any
GO:0070062	extracellular exosome	GO:CC	8.03e-05	2144	322	ENSG00000065621, ENSG00000151892, ENSG00000187908, ENSG00000148484, ENSG00000107611, ENSG00000078114, ENSG00000122861, ENSG00000107796, ENSG00000187240, ENSG00000137710, ENSG00000149300, ENSG00000109846, ENSG00000137642, ENSG00000154133, ENSG00000134955, ENSG00000133818, ENSG00000130592, ENSG00000198168, ENSG00000026508, ENSG00000085117, ENSG00000149131, ENSG00000011347, ENSG00000124942, ENSG0000…	GSTO2, GFRA1, DMBT1, RSU1, CUBN, NEBL, PLAU, ACTA2, DYNC2H1, RDX, C11orf52, CRYAB, SORL1, ROBO4, SLC37A2, RRAS2, LSP1, SVIP, CD44, CD82, SERPING1, SYT7, AHNAK, FERMT3, EHD1, DNHD1, LTBP3, CST6, TPP1, FOLR1, CAPN5, MTMR2, TXNRD1, GPRC5A, H2AFJ, MGP, PTPRO, LRRK2, CNTN1, SLC38A1, RAPGEF3, KRT75, ITGB7, MYL6B, MYL6, SCNN1A, TSPAN8, C1RL, RBP5, LIN7A, PPFIA2, RASSF9, GALNT4, ATP2B1, A2M, GAS6, WASF3,…	any
GO:0099081	supramolecular polymer	GO:CC	8.15e-05	1001	169	ENSG00000078114, ENSG00000170759, ENSG00000099250, ENSG00000138347, ENSG00000122367, ENSG00000107796, ENSG00000148677, ENSG00000165887, ENSG00000187240, ENSG00000109846, ENSG00000166250, ENSG00000124942, ENSG00000149499, ENSG00000139354, ENSG00000139112, ENSG00000089250, ENSG00000057294, ENSG00000139116, ENSG00000196876, ENSG00000167767, ENSG00000170442, ENSG00000205426, ENSG00000170454, ENSG0000…	NEBL, KIF5B, NRP1, MYPN, LDB3, ACTA2, ANKRD1, ANKRD2, DYNC2H1, CRYAB, CLMP, AHNAK, EML3, GAS2L3, GABARAPL1, NOS1, PKP2, KIF21A, SCN8A, KRT80, KRT86, KRT81, KRT75, MYL6B, KIF5A, PAWR, MFAP5, DCN, TUBA3C, KATNAL1, LCP1, AHNAK2, CFL2, FERMT2, ACTN1, FMN1, ACTC1, TMOD2, TMOD3, MYZAP, TPM1, FAM154B, SYNM, CORO1A, PPL, MMP2, ENKD1, COTL1, TUBB3, TUBB3, MYH8, MYH1, MYH2, MYH3, SPECC1, KRTAP1-5, KRTAP2-3…	any
GO:0030239	myofibril assembly	GO:BP	8.5e-05	68	18	ENSG00000078114, ENSG00000122367, ENSG00000148677, ENSG00000165410, ENSG00000159251, ENSG00000128872, ENSG00000138594, ENSG00000140416, ENSG00000109063, ENSG00000133026, ENSG00000101605, ENSG00000134775, ENSG00000118194, ENSG00000159176, ENSG00000163431, ENSG00000172399, ENSG00000078401, ENSG00000154330	NEBL, LDB3, ANKRD1, CFL2, ACTC1, TMOD2, TMOD3, TPM1, MYH3, MYH10, MYOM1, FHOD3, TNNT2, CSRP1, LMOD1, MYOZ2, EDN1, PGM5	downregulated
GO:0120036	plasma membrane bounded cell projection organization	GO:BP	8.97e-05	1539	139	ENSG00000099204, ENSG00000066468, ENSG00000151640, ENSG00000170759, ENSG00000148677, ENSG00000137710, ENSG00000149571, ENSG00000176697, ENSG00000007372, ENSG00000110047, ENSG00000068971, ENSG00000110195, ENSG00000087053, ENSG00000135127, ENSG00000151490, ENSG00000139132, ENSG00000173208, ENSG00000018236, ENSG00000155974, ENSG00000127328, ENSG00000074527, ENSG00000041515, ENSG00000132932, ENSG0000…	ABLIM1, FGFR2, DPYSL4, KIF5B, ANKRD1, RDX, KIRREL3, BDNF, PAX6, EHD1, PPP2R5B, FOLR1, MTMR2, CCDC64, PTPRO, FGD4, ABCD2, CNTN1, GRIP1, RAB3IP, NTN4, MYO16, ATP8A2, WASF3, FRY, DCLK1, KLF5, FARP1, AJUBA, SPTB, LGMN, CLMN, TPM1, NPTN, RASGRF1, IGF1R, DOK4, PMP22, ULK2, SLC9A3R1, MYH10, NTN1, CDH2, EPB41L3, PTPRM, ATCAY, APOE, LRRC4B, CACNG7, PALM, CAMSAP3, EVI5L, CELSR2, AMIGO1, TSPAN2, NGF, PHGDH,…	downregulated
GO:0097060	synaptic membrane	GO:CC	9.04e-05	390	49	ENSG00000109846, ENSG00000149403, ENSG00000087053, ENSG00000149972, ENSG00000111450, ENSG00000151490, ENSG00000018236, ENSG00000155974, ENSG00000102468, ENSG00000118946, ENSG00000178695, ENSG00000152767, ENSG00000186297, ENSG00000166206, ENSG00000156642, ENSG00000237515, ENSG00000169181, ENSG00000108852, ENSG00000108370, ENSG00000075461, ENSG00000170558, ENSG00000105088, ENSG00000104863, ENSG0000…	CRYAB, GRIK4, MTMR2, CNTN5, STX2, PTPRO, CNTN1, GRIP1, HTR2A, PCDH17, KCTD12, FARP1, GABRA5, GABRB3, NPTN, SHISA9, GSG1L, MPP2, RGS9, CACNG4, CDH2, OLFM2, LIN7B, LRRC4B, CACNG7, PALM, DNM3, ADORA1, ERBB4, SLC8A1, NRXN1, CSPG5, ERC2, GLRB, ADRA2C, KCTD16, CLTB, IL31RA, STX11, RIMS1, SNAP91, NRCAM, GPER1, DGKI, RIMS2, APBA1, GPC4, FMR1, CNKSR2	downregulated
GO:0140352	export from cell	GO:BP	9.47e-05	1616	146	ENSG00000151651, ENSG00000122861, ENSG00000133805, ENSG00000198168, ENSG00000026508, ENSG00000019505, ENSG00000110492, ENSG00000149131, ENSG00000011347, ENSG00000149781, ENSG00000110076, ENSG00000122986, ENSG00000118308, ENSG00000188906, ENSG00000079337, ENSG00000111052, ENSG00000139220, ENSG00000171860, ENSG00000070961, ENSG00000175899, ENSG00000102524, ENSG00000133110, ENSG00000102760, ENSG0000…	ADAM8, PLAU, AMPD3, SVIP, CD44, SYT13, MDK, SERPING1, SYT7, FERMT3, NRXN2, HVCN1, LRMP, LRRK2, RAPGEF3, LIN7A, PPFIA2, C3AR1, ATP2B1, A2M, TNFSF13B, POSTN, RGCC, LGALS3, LTBP2, GPR68, SERPINA1, FGF7, NOX5, ISLR, CHRNA3, NMB, ANPEP, MCTP2, SSTR5, RAB26, LAT, PRRT2, CORO1A, MMP25, STX1B, PYCARD, ITGAX, PARD6A, ADORA2B, LGALS9, ALDOC, TRPV1, NR1D1, JUP, ATP6V0A1, SEPT4, CD68, TMC6, GAA, RAB27B, SERP…	upregulated
GO:0002062	chondrocyte differentiation	GO:BP	9.63e-05	125	37	ENSG00000165471, ENSG00000110693, ENSG00000110492, ENSG00000168056, ENSG00000139567, ENSG00000149948, ENSG00000102678, ENSG00000125378, ENSG00000166949, ENSG00000157766, ENSG00000183688, ENSG00000168646, ENSG00000125398, ENSG00000060718, ENSG00000179403, ENSG00000143816, ENSG00000125965, ENSG00000125845, ENSG00000142156, ENSG00000142173, ENSG00000074047, ENSG00000132031, ENSG00000163359, ENSG0000…	MBL2, SOX6, MDK, LTBP3, ACVRL1, HMGA2, FGF9, BMP4, SMAD3, ACAN, FAM101B, AXIN2, SOX9, COL11A1, VWA1, WNT9A, GDF5, BMP2, COL6A1, COL6A2, GLI2, MATN3, COL6A3, RARB, PTH1R, RP5-966M1.6, NKX3-2, FGFR3, CYTL1, BMPR1B, TGFBI, MSX2, CTGF, GPLD1, NOV, SULF1, COL27A1	any
GO:0042110	T cell activation	GO:BP	9.73e-05	478	59	ENSG00000151651, ENSG00000177283, ENSG00000108175, ENSG00000026508, ENSG00000110492, ENSG00000135426, ENSG00000102524, ENSG00000125245, ENSG00000129465, ENSG00000131981, ENSG00000185650, ENSG00000166949, ENSG00000213658, ENSG00000102879, ENSG00000103490, ENSG00000168961, ENSG00000108691, ENSG00000207808, ENSG00000105329, ENSG00000079385, ENSG00000069399, ENSG00000104856, ENSG00000162692, ENSG0000…	ADAM8, FZD8, ZMIZ1, CD44, MDK, TESPA1, TNFSF13B, GPR18, RIPK3, LGALS3, ZFP36L1, SMAD3, LAT, CORO1A, PYCARD, LGALS9, CCL2, MIR27A, TGFB1, CEACAM1, BCL3, RELB, VCAM1, PTPN22, TNFRSF4, TNFRSF1B, FCER1G, TNFSF18, TNFSF4, PTPRC, IL23R, BCL10, ADA, PREX1, NFATC2, RAC2, DPP4, SLC11A1, FKBP1B, ZFP36L2, NFKBIZ, BCL6, PPP3CA, IRF1, TCF7, EGR1, SPINK5, CD74, IL7R, MYB, HLA-DRB1, HLA-DMB, HLA-DPA1, EPHB6, IL…	upregulated
GO:0072001	renal system development	GO:BP	9.92e-05	296	67	ENSG00000066468, ENSG00000099250, ENSG00000165731, ENSG00000150347, ENSG00000107796, ENSG00000149571, ENSG00000205213, ENSG00000176697, ENSG00000134569, ENSG00000166341, ENSG00000151490, ENSG00000188906, ENSG00000011465, ENSG00000125378, ENSG00000248905, ENSG00000166949, ENSG00000177508, ENSG00000132386, ENSG00000126562, ENSG00000260027, ENSG00000159640, ENSG00000125398, ENSG00000006016, ENSG0000…	FGFR2, NRP1, RET, ARID5B, ACTA2, KIRREL3, LGR4, BDNF, LRP4, DCHS1, PTPRO, LRRK2, DCN, BMP4, FMN1, SMAD3, IRX3, SERPINF1, WNK4, HOXB7, ACE, SOX9, CRLF1, TGFB1, FSTL3, PBX1, TGFB2, AGT, NID1, KIF26B, TP73, NFIA, BMP2, GLI2, COL4A4, COL4A3, WWTR1, MME, RARB, WNT5A, ROBO2, ENPEP, FGF2, FAT4, SMAD1, DCHS2, PROM1, PDGFRA, WFS1, FRAS1, EGR1, FGF1, ADAMTS16, GCNT4, VEGFA, ANGPT1, HAS2, MTSS1, MYC, ANGPT2…	any
GO:0043025	neuronal cell body	GO:CC	0.000100119	523	100	ENSG00000099250, ENSG00000165731, ENSG00000109846, ENSG00000080854, ENSG00000134569, ENSG00000011347, ENSG00000174791, ENSG00000166405, ENSG00000188906, ENSG00000139567, ENSG00000155980, ENSG00000155974, ENSG00000070961, ENSG00000102468, ENSG00000072415, ENSG00000139985, ENSG00000186297, ENSG00000080644, ENSG00000103490, ENSG00000132386, ENSG00000128482, ENSG00000196689, ENSG00000161381, ENSG0000…	NRP1, RET, CRYAB, IGSF9B, LRP4, SYT7, RIN1, RIC3, LRRK2, ACVRL1, KIF5A, GRIP1, ATP2B1, HTR2A, MPP5, ADAM21, GABRA5, CHRNA3, PYCARD, SERPINF1, RNF112, TRPV1, PLXDC1, CYGB, MYH10, CD22, TGFB1, KCNN4, APOE, KCNJ14, CACNG7, SORT1, AMIGO1, TNFRSF1B, BGLAP, GLUL, ADORA1, KISS1, KCNK2, TGFB2, KCNK1, PLK3, TTLL7, CNN3, ADA, EEF1A2, ITSN1, TMPRSS3, TRPM2, RTN4R, P2RX6, KREMEN1, MAPK8IP2, KIF5C, ERMN, SCN1…	any
GO:0043230	extracellular organelle	GO:CC	0.000100319	2172	325	ENSG00000065621, ENSG00000151892, ENSG00000187908, ENSG00000148484, ENSG00000107611, ENSG00000078114, ENSG00000122861, ENSG00000107796, ENSG00000187240, ENSG00000137710, ENSG00000149300, ENSG00000109846, ENSG00000137642, ENSG00000154133, ENSG00000134955, ENSG00000133818, ENSG00000130592, ENSG00000198168, ENSG00000026508, ENSG00000085117, ENSG00000149131, ENSG00000011347, ENSG00000124942, ENSG0000…	GSTO2, GFRA1, DMBT1, RSU1, CUBN, NEBL, PLAU, ACTA2, DYNC2H1, RDX, C11orf52, CRYAB, SORL1, ROBO4, SLC37A2, RRAS2, LSP1, SVIP, CD44, CD82, SERPING1, SYT7, AHNAK, FERMT3, EHD1, DNHD1, LTBP3, CST6, TPP1, FOLR1, CAPN5, MTMR2, TXNRD1, GPRC5A, H2AFJ, MGP, PTPRO, LRRK2, CNTN1, SLC38A1, RAPGEF3, KRT75, ITGB7, MYL6B, MYL6, SCNN1A, TSPAN8, C1RL, RBP5, LIN7A, PPFIA2, RASSF9, GALNT4, ATP2B1, A2M, GAS6, WASF3,…	any
GO:0060284	regulation of cell development	GO:BP	0.000102498	991	100	ENSG00000148803, ENSG00000099250, ENSG00000165731, ENSG00000107984, ENSG00000148948, ENSG00000110492, ENSG00000134569, ENSG00000089250, ENSG00000123095, ENSG00000188906, ENSG00000135407, ENSG00000139220, ENSG00000133110, ENSG00000136160, ENSG00000178235, ENSG00000119714, ENSG00000166145, ENSG00000137872, ENSG00000080644, ENSG00000185033, ENSG00000099365, ENSG00000177508, ENSG00000205336, ENSG0000…	FUOM, NRP1, RET, DKK1, LRRC4C, MDK, LRP4, NOS1, BHLHE41, LRRK2, AVIL, PPFIA2, POSTN, EDNRB, SLITRK1, GPR68, SPINT1, SEMA6D, CHRNA3, SEMA4B, STX1B, IRX3, GPR56, SCARF1, SERPINF1, RNF112, OMG, TRPV1, NR1D1, GFAP, MMD, SOX9, HES7, SIGLEC15, TGFB1, SEMA6B, CSF1, DRAXIN, TNFRSF1B, CHRNB2, TRIM46, RGS4, PBX1, PRRX1, RGS2, SYT2, TP73, GDF5, PREX1, BMP2, MAP4K4, FRZB, FN1, SERPINE2, PER2, FKBP1B, PPARG, …	upregulated
GO:0001775	cell activation	GO:BP	0.000104748	1465	135	ENSG00000151651, ENSG00000177283, ENSG00000067082, ENSG00000122861, ENSG00000108175, ENSG00000133805, ENSG00000198168, ENSG00000064201, ENSG00000026508, ENSG00000110492, ENSG00000149781, ENSG00000168062, ENSG00000122986, ENSG00000111252, ENSG00000118308, ENSG00000188906, ENSG00000135426, ENSG00000171860, ENSG00000102524, ENSG00000102760, ENSG00000125245, ENSG00000157227, ENSG00000129465, ENSG0000…	ADAM8, FZD8, KLF6, PLAU, ZMIZ1, AMPD3, SVIP, TSPAN32, CD44, MDK, FERMT3, BATF2, HVCN1, SH2B3, LRMP, LRRK2, TESPA1, C3AR1, TNFSF13B, RGCC, GPR18, MMP14, RIPK3, GNG2, LGALS3, ZFP36L1, SERPINA1, SMAD3, ANPEP, LAT, CORO1A, MMP25, PYCARD, ITGAX, ADORA2B, LGALS9, ALDOC, CCL2, TRPV1, NR1D1, JUP, ATP6V0A1, SPHK1, CYGB, TNFSF13, CD68, TMC6, GAA, SERPINB3, MIR27A, EMR2, F2RL3, CD22, TGFB1, POU2F2, CEACAM1,…	upregulated
GO:0005856	cytoskeleton	GO:CC	0.000107686	2263	186	ENSG00000099204, ENSG00000078114, ENSG00000170759, ENSG00000122367, ENSG00000107796, ENSG00000137710, ENSG00000109846, ENSG00000099849, ENSG00000149201, ENSG00000139354, ENSG00000139112, ENSG00000074590, ENSG00000135127, ENSG00000158023, ENSG00000139132, ENSG00000057294, ENSG00000139116, ENSG00000167767, ENSG00000170442, ENSG00000205426, ENSG00000196465, ENSG00000092841, ENSG00000127328, ENSG0000…	ABLIM1, NEBL, KIF5B, LDB3, ACTA2, RDX, CRYAB, RASSF7, CCDC81, GAS2L3, GABARAPL1, NUAK1, CCDC64, WDR66, FGD4, PKP2, KIF21A, KRT80, KRT86, KRT81, MYL6B, MYL6, RAB3IP, PAWR, MYO16, TUBA3C, LATS2, WASF3, FLT1, KATNAL1, FRY, LCP1, FARP1, AJUBA, CFL2, FERMT2, SPTB, ACTN1, TJP1, ACTC1, TMOD2, TMOD3, CGNL1, MYZAP, TPM1, SYNM, COTL1, MYH8, MYH1, MYH2, MYH3, SPECC1, FAM101B, TAX1BP3, CDC6, KRTAP2-3, KRT34,…	downregulated
GO:0042734	presynaptic membrane	GO:CC	0.000110785	157	27	ENSG00000149403, ENSG00000149972, ENSG00000111450, ENSG00000018236, ENSG00000102468, ENSG00000118946, ENSG00000178695, ENSG00000186297, ENSG00000156642, ENSG00000170558, ENSG00000131409, ENSG00000163485, ENSG00000178568, ENSG00000179915, ENSG00000187672, ENSG00000183775, ENSG00000175416, ENSG00000164509, ENSG00000135604, ENSG00000079841, ENSG00000065609, ENSG00000164850, ENSG00000157680, ENSG0000…	GRIK4, CNTN5, STX2, CNTN1, HTR2A, PCDH17, KCTD12, GABRA5, NPTN, CDH2, LRRC4B, ADORA1, ERBB4, NRXN1, ERC2, KCTD16, CLTB, IL31RA, STX11, RIMS1, SNAP91, GPER1, DGKI, RIMS2, APBA1, GPC4, FMR1	downregulated
GO:0001816	cytokine production	GO:BP	0.000112904	837	88	ENSG00000151651, ENSG00000185187, ENSG00000110492, ENSG00000168056, ENSG00000188906, ENSG00000171860, ENSG00000070961, ENSG00000133110, ENSG00000102760, ENSG00000125245, ENSG00000129465, ENSG00000100784, ENSG00000166949, ENSG00000255346, ENSG00000103490, ENSG00000205336, ENSG00000258839, ENSG00000170425, ENSG00000168961, ENSG00000108771, ENSG00000176170, ENSG00000101695, ENSG00000102575, ENSG0000…	ADAM8, SIGIRR, MDK, LTBP3, LRRK2, C3AR1, ATP2B1, POSTN, RGCC, GPR18, RIPK3, RPS6KA5, SMAD3, NOX5, PYCARD, GPR56, MC1R, ADORA2B, LGALS9, DHX58, SPHK1, RNF125, ACP5, ZFP36, TGFB1, CEACAM1, BCL3, RELB, C5AR2, CD33, C3, PTPN22, TNFRSF4, TNFRSF1B, IFI16, FCER1G, TNFSF4, PTGS2, PTPRC, CHI3L1, LURAP1, IL23R, ERRFI1, BCL10, NFATC2, MERTK, TRIB2, PLA2R1, IFIH1, FN1, SLC11A1, UCN, SUCNR1, BCL6, APOD, NRROS…	upregulated
GO:1903561	extracellular vesicle	GO:CC	0.000113329	2167	324	ENSG00000065621, ENSG00000151892, ENSG00000187908, ENSG00000148484, ENSG00000107611, ENSG00000078114, ENSG00000122861, ENSG00000107796, ENSG00000187240, ENSG00000137710, ENSG00000149300, ENSG00000109846, ENSG00000137642, ENSG00000154133, ENSG00000134955, ENSG00000133818, ENSG00000130592, ENSG00000198168, ENSG00000026508, ENSG00000085117, ENSG00000149131, ENSG00000011347, ENSG00000124942, ENSG0000…	GSTO2, GFRA1, DMBT1, RSU1, CUBN, NEBL, PLAU, ACTA2, DYNC2H1, RDX, C11orf52, CRYAB, SORL1, ROBO4, SLC37A2, RRAS2, LSP1, SVIP, CD44, CD82, SERPING1, SYT7, AHNAK, FERMT3, EHD1, DNHD1, LTBP3, CST6, TPP1, FOLR1, CAPN5, MTMR2, TXNRD1, GPRC5A, H2AFJ, MGP, PTPRO, LRRK2, CNTN1, SLC38A1, RAPGEF3, KRT75, ITGB7, MYL6B, MYL6, SCNN1A, TSPAN8, C1RL, RBP5, LIN7A, PPFIA2, RASSF9, GALNT4, ATP2B1, A2M, GAS6, WASF3,…	any
GO:0022612	gland morphogenesis	GO:BP	0.000121349	126	37	ENSG00000066468, ENSG00000099250, ENSG00000007372, ENSG00000110492, ENSG00000162337, ENSG00000074527, ENSG00000213145, ENSG00000125378, ENSG00000140285, ENSG00000125398, ENSG00000109062, ENSG00000065320, ENSG00000128791, ENSG00000105329, ENSG00000079385, ENSG00000184371, ENSG00000092969, ENSG00000198959, ENSG00000074047, ENSG00000072163, ENSG00000163235, ENSG00000073282, ENSG00000114251, ENSG0000…	FGFR2, NRP1, PAX6, MDK, LRP5, NTN4, CRIP1, BMP4, FGF7, SOX9, SLC9A3R1, NTN1, TWSG1, TGFB1, CEACAM1, CSF1, TGFB2, TGM2, GLI2, LIMS2, TGFA, TP63, WNT5A, AREG, FGF1, CSF1R, MSX2, TNFAIP3, ID4, SEMA3C, HGF, SEMA3A, PLAG1, CYP7B1, SULF1, TNC, NOTCH1	any
GO:0005911	cell-cell junction	GO:CC	0.000123047	439	87	ENSG00000107554, ENSG00000150054, ENSG00000165757, ENSG00000170324, ENSG00000182985, ENSG00000166250, ENSG00000149564, ENSG00000184363, ENSG00000124942, ENSG00000057294, ENSG00000111052, ENSG00000184226, ENSG00000134873, ENSG00000129474, ENSG00000072415, ENSG00000072110, ENSG00000104067, ENSG00000248905, ENSG00000128849, ENSG00000182253, ENSG00000213658, ENSG00000102879, ENSG00000118898, ENSG0000…	DNMBP, MPP7, KIAA1462, FRMPD2, CADM1, CLMP, ESAM, PKP3, AHNAK, PKP2, LIN7A, PCDH9, CLDN10, AJUBA, MPP5, ACTN1, TJP1, FMN1, CGNL1, SYNM, LAT, CORO1A, PPL, FHOD1, PARD6A, MARVELD3, MYH1, MYH2, PMP22, PLXDC1, JUP, WNK4, CDH2, DSG2, EPB41L3, PTPRM, WTIP, CEACAM1, LIN7B, CAMSAP3, CGN, RAB13, ATP1B1, PTPRU, COL16A1, GJB3, NEXN, PARD6B, EPB41L5, LIMS2, PKP4, DPP4, SCN2A, SCN1A, SLC8A1, CCDC85A, CLDN1, S…	any
GO:0099536	synaptic signaling	GO:BP	0.000124062	745	135	ENSG00000170759, ENSG00000107984, ENSG00000122877, ENSG00000122862, ENSG00000149403, ENSG00000080854, ENSG00000176697, ENSG00000148948, ENSG00000011347, ENSG00000110076, ENSG00000174871, ENSG00000174791, ENSG00000166405, ENSG00000087053, ENSG00000089250, ENSG00000060709, ENSG00000111450, ENSG00000188906, ENSG00000185482, ENSG00000155980, ENSG00000111052, ENSG00000139220, ENSG00000102468, ENSG0000…	KIF5B, DKK1, EGR2, SRGN, GRIK4, IGSF9B, BDNF, LRRC4C, SYT7, NRXN2, CNIH2, RIN1, RIC3, MTMR2, NOS1, RIMBP2, STX2, LRRK2, STAC3, KIF5A, LIN7A, PPFIA2, HTR2A, PCDH17, FARP1, BEGAIN, AKAP5, LGMN, GABRA5, GABRB3, SLC12A6, TMOD2, NPTN, C15orf59, CHRNA3, RASGRF1, MCTP2, SHISA9, RAB26, PRRT2, STX1B, ABAT, PMP22, ADORA2B, CCL2, TRPV1, MPP2, GFAP, MYCBPAP, CACNG4, GRIN2C, CDH2, GIPC1, TSHZ3, APOE, LIN7B, N…	any
GO:0040007	growth	GO:BP	0.000124067	1020	174	ENSG00000066468, ENSG00000099250, ENSG00000165471, ENSG00000150347, ENSG00000108175, ENSG00000095587, ENSG00000137745, ENSG00000109846, ENSG00000176697, ENSG00000110492, ENSG00000134569, ENSG00000068831, ENSG00000111666, ENSG00000134531, ENSG00000139567, ENSG00000149948, ENSG00000139318, ENSG00000133639, ENSG00000183087, ENSG00000150457, ENSG00000102678, ENSG00000132932, ENSG00000133083, ENSG0000…	FGFR2, NRP1, MBL2, ARID5B, ZMIZ1, TLL2, MMP13, CRYAB, BDNF, MDK, LRP4, RASGRP2, CHPT1, EMP1, ACVRL1, HMGA2, DUSP6, BTG1, GAS6, LATS2, FGF9, ATP8A2, DCLK1, POSTN, KLF5, SLITRK1, SLITRK6, MMP14, BMP4, ZFP36L1, LGMN, FMN1, SEMA6D, FGF7, SMAD3, SEMA4B, NKD1, ULK2, KRT17, STAT5A, SOX9, SPHK1, NTN1, EPB41L3, MIR23A, GDF15, TGFB1, CEACAM1, APOE, SEMA6B, DACT3, CACNG7, CSF1, NGF, PTGFRN, DRAXIN, VWA1, SH…	any
GO:0001655	urogenital system development	GO:BP	0.000130727	335	73	ENSG00000066468, ENSG00000099250, ENSG00000165731, ENSG00000150347, ENSG00000107796, ENSG00000149571, ENSG00000205213, ENSG00000176697, ENSG00000134569, ENSG00000166341, ENSG00000151490, ENSG00000188906, ENSG00000011465, ENSG00000213145, ENSG00000125378, ENSG00000248905, ENSG00000166949, ENSG00000177508, ENSG00000132386, ENSG00000126562, ENSG00000260027, ENSG00000159640, ENSG00000125398, ENSG0000…	FGFR2, NRP1, RET, ARID5B, ACTA2, KIRREL3, LGR4, BDNF, LRP4, DCHS1, PTPRO, LRRK2, DCN, CRIP1, BMP4, FMN1, SMAD3, IRX3, SERPINF1, WNK4, HOXB7, ACE, SOX9, CRLF1, TGFB1, FSTL3, PBX1, TGFB2, AGT, NID1, KIF26B, TP73, NFIA, BMP2, GLI2, COL4A4, COL4A3, WWTR1, MME, TP63, RARB, WNT5A, ROBO2, ENPEP, FGF2, FAT4, SMAD1, DCHS2, PROM1, PDGFRA, WFS1, FRAS1, EGR1, FGF1, ADAMTS16, GCNT4, ID4, VEGFA, ANGPT1, HAS2, …	any
GO:0008201	heparin binding	GO:MF	0.000133667	171	44	ENSG00000066468, ENSG00000099250, ENSG00000166106, ENSG00000110492, ENSG00000102678, ENSG00000133110, ENSG00000125378, ENSG00000119681, ENSG00000140479, ENSG00000137801, ENSG00000140285, ENSG00000205336, ENSG00000103196, ENSG00000130203, ENSG00000060718, ENSG00000169231, ENSG00000081237, ENSG00000180875, ENSG00000084636, ENSG00000142871, ENSG00000064205, ENSG00000040608, ENSG00000144152, ENSG0000…	FGFR2, NRP1, ADAMTS15, MDK, FGF9, POSTN, BMP4, LTBP2, PCSK6, THBS1, FGF7, GPR56, CRISPLD2, APOE, COL11A1, THBS3, PTPRC, GREM2, COL16A1, CYR61, WISP2, RTN4R, FBLN7, FN1, SERPINE2, ABI3BP, FSTL1, COLQ, LXN, LIPH, CLEC3B, FGF2, HBEGF, FGF1, WISP3, RSPO3, CTGF, THBS2, TNXB, VEGFA, PCOLCE, TMEM184A, NOV, ECM2	any
GO:0001822	kidney development	GO:BP	0.000134011	286	65	ENSG00000066468, ENSG00000099250, ENSG00000165731, ENSG00000150347, ENSG00000107796, ENSG00000149571, ENSG00000205213, ENSG00000176697, ENSG00000134569, ENSG00000166341, ENSG00000151490, ENSG00000188906, ENSG00000011465, ENSG00000125378, ENSG00000248905, ENSG00000166949, ENSG00000177508, ENSG00000132386, ENSG00000126562, ENSG00000260027, ENSG00000159640, ENSG00000125398, ENSG00000006016, ENSG0000…	FGFR2, NRP1, RET, ARID5B, ACTA2, KIRREL3, LGR4, BDNF, LRP4, DCHS1, PTPRO, LRRK2, DCN, BMP4, FMN1, SMAD3, IRX3, SERPINF1, WNK4, HOXB7, ACE, SOX9, CRLF1, TGFB1, FSTL3, PBX1, TGFB2, AGT, NID1, KIF26B, TP73, BMP2, GLI2, COL4A4, COL4A3, WWTR1, MME, RARB, ROBO2, ENPEP, FGF2, FAT4, SMAD1, DCHS2, PROM1, PDGFRA, WFS1, FRAS1, EGR1, FGF1, ADAMTS16, GCNT4, VEGFA, ANGPT1, HAS2, MTSS1, MYC, ANGPT2, SULF1, EYA1…	any
GO:0034097	response to cytokine	GO:BP	0.000141493	1225	117	ENSG00000150347, ENSG00000185201, ENSG00000185885, ENSG00000142089, ENSG00000026508, ENSG00000185187, ENSG00000175592, ENSG00000111252, ENSG00000089127, ENSG00000111335, ENSG00000135114, ENSG00000102524, ENSG00000127863, ENSG00000133110, ENSG00000213928, ENSG00000185650, ENSG00000170345, ENSG00000100784, ENSG00000165949, ENSG00000166949, ENSG00000172183, ENSG00000102879, ENSG00000103490, ENSG0000…	ARID5B, IFITM2, IFITM1, IFITM3, CD44, SIGIRR, FOSL1, SH2B3, OAS1, OAS2, OASL, TNFSF13B, TNFRSF19, POSTN, IRF9, ZFP36L1, FOS, RPS6KA5, IFI27, SMAD3, ISG20, CORO1A, PYCARD, ITGAX, MMP2, LGALS9, CCL2, TRPV1, NR1D1, STAT5A, SOX9, SPHK1, TNFSF13, CARD14, ACP5, JUNB, CRLF1, ZFP36, CEACAM1, RELB, FLT3LG, VCAM1, CSF1, TNFRSF4, TNFRSF1B, SHC1, DCST1, MUC1, IFI16, FCER1G, TNFSF18, TNFSF4, PTGS2, PTPRC, CHI…	upregulated
GO:0005198	structural molecule activity	GO:MF	0.000145137	683	124	ENSG00000078114, ENSG00000165887, ENSG00000109846, ENSG00000124942, ENSG00000111341, ENSG00000170454, ENSG00000196465, ENSG00000092841, ENSG00000139220, ENSG00000197614, ENSG00000011465, ENSG00000198033, ENSG00000133110, ENSG00000134873, ENSG00000070182, ENSG00000072110, ENSG00000119681, ENSG00000137801, ENSG00000140416, ENSG00000157766, ENSG00000182253, ENSG00000118898, ENSG00000198211, ENSG0000…	NEBL, ANKRD2, CRYAB, AHNAK, MGP, KRT75, MYL6B, MYL6, PPFIA2, MFAP5, DCN, TUBA3C, POSTN, CLDN10, SPTB, ACTN1, LTBP2, THBS1, TPM1, ACAN, SYNM, PPL, TUBB3, TUBB3, MYH8, KRT34, KRT15, KRT17, JUP, MPP2, GFAP, SEPT4, EMILIN2, MYOM1, EPB41L3, APOE, COL11A1, VWA1, TUFT1, THBS3, BGLAP, MPZ, MPZL1, DNM3, ARPC5, CSRP1, CHI3L1, LAMB3, NID1, ACTN2, EPB41, TINAGL1, COL16A1, COL8A2, NEXN, CYR61, SNTA1, SPAG4, M…	any
GO:0043005	neuron projection	GO:CC	0.000150258	1376	124	ENSG00000099250, ENSG00000165731, ENSG00000138347, ENSG00000154133, ENSG00000080854, ENSG00000019505, ENSG00000134569, ENSG00000011347, ENSG00000149489, ENSG00000175592, ENSG00000174871, ENSG00000174791, ENSG00000089250, ENSG00000188906, ENSG00000139567, ENSG00000155980, ENSG00000135407, ENSG00000139220, ENSG00000070961, ENSG00000184226, ENSG00000170345, ENSG00000186417, ENSG00000080644, ENSG0000…	NRP1, RET, MYPN, ROBO4, IGSF9B, SYT13, LRP4, SYT7, ROM1, FOSL1, CNIH2, RIN1, NOS1, LRRK2, ACVRL1, KIF5A, AVIL, PPFIA2, ATP2B1, PCDH9, FOS, GLDN, CHRNA3, ABHD17C, NMB, SSTR5, PRRT2, CORO1A, STX1B, IRX3, TUBB3, SERPINF1, RNF112, TRPV1, NR1D1, PRCD, CYGB, FSCN2, RAB27B, TSHZ3, TGFB1, KCNN4, KCNJ14, TNFRSF1B, S100A4, RAB13, CHRNB2, TRIM46, BGLAP, KIFAP3, GLUL, PTGS2, RGS2, NAV1, SYT2, KCNK2, CNIH3, K…	upregulated
GO:0120025	plasma membrane bounded cell projection	GO:CC	0.000150589	2200	181	ENSG00000120051, ENSG00000099204, ENSG00000170759, ENSG00000122367, ENSG00000107796, ENSG00000137710, ENSG00000204381, ENSG00000109846, ENSG00000149571, ENSG00000176697, ENSG00000068831, ENSG00000110047, ENSG00000110195, ENSG00000166405, ENSG00000087053, ENSG00000139112, ENSG00000158023, ENSG00000111450, ENSG00000151490, ENSG00000139132, ENSG00000111371, ENSG00000196876, ENSG00000047617, ENSG0000…	CCDC147, ABLIM1, KIF5B, LDB3, ACTA2, RDX, LAYN, CRYAB, KIRREL3, BDNF, RASGRP2, EHD1, FOLR1, RIC3, MTMR2, GABARAPL1, WDR66, STX2, PTPRO, FGD4, SLC38A1, SCN8A, ANO2, GRIP1, RAB3IP, TPH2, ATP8A2, WASF3, LCP1, HTR2A, FARP1, NDRG2, AJUBA, FERMT2, SAMD4A, GCH1, AKAP5, MPP5, ACTN1, ADAM21, GABRA5, GABRB3, ACTC1, TMOD2, TPM1, NPTN, RASGRF1, IGF1R, SHISA9, GNAO1, ABAT, PLXDC1, MPP2, SLC9A3R1, MYH10, CDH2,…	downregulated
GO:0051015	actin filament binding	GO:MF	0.00015153	196	31	ENSG00000099204, ENSG00000078114, ENSG00000149591, ENSG00000041515, ENSG00000136167, ENSG00000129474, ENSG00000165410, ENSG00000073712, ENSG00000070182, ENSG00000072110, ENSG00000165959, ENSG00000140416, ENSG00000103187, ENSG00000133020, ENSG00000109061, ENSG00000125414, ENSG00000109063, ENSG00000133026, ENSG00000101605, ENSG00000105357, ENSG00000076826, ENSG00000162704, ENSG00000162614, ENSG0000…	ABLIM1, NEBL, TAGLN, MYO16, LCP1, AJUBA, CFL2, FERMT2, SPTB, ACTN1, CLMN, TPM1, COTL1, MYH8, MYH1, MYH2, MYH3, MYH10, MYOM1, MYH14, CAMSAP3, ARPC5, NEXN, DSTN, MYO7B, PLS1, TNNC1, EZR, PPP1R9A, AIF1L, TPM2	downregulated
GO:0050920	regulation of chemotaxis	GO:BP	0.000163337	216	53	ENSG00000099250, ENSG00000156026, ENSG00000110492, ENSG00000151490, ENSG00000171860, ENSG00000183087, ENSG00000125245, ENSG00000100600, ENSG00000137801, ENSG00000137872, ENSG00000035664, ENSG00000166949, ENSG00000172349, ENSG00000185033, ENSG00000168961, ENSG00000108691, ENSG00000108861, ENSG00000167680, ENSG00000134830, ENSG00000184371, ENSG00000128340, ENSG00000197635, ENSG00000171951, ENSG0000…	NRP1, MCU, MDK, PTPRO, C3AR1, GAS6, GPR18, LGMN, THBS1, SEMA6D, DAPK2, SMAD3, IL16, SEMA4B, LGALS9, CCL2, DUSP3, SEMA6B, C5AR2, CSF1, RAC2, DPP4, SCG2, DYSF, SUCNR1, IL12A, SEMA3B, WNT5A, ROBO2, FGF2, PDGFRA, IL8, FGF1, CD74, ITGA2, EDN1, TUBB2B, VEGFA, SERPINE1, PLXNA4, RARRES2, IL6, SEMA3C, SEMA3E, SEMA3A, SEMA3D, NOV, LYN, ANGPT2, LPAR1, C5, NOTCH1, MOSPD2	any
GO:0034220	ion transmembrane transport	GO:BP	0.000172404	1184	196	ENSG00000170759, ENSG00000156026, ENSG00000152779, ENSG00000176273, ENSG00000149403, ENSG00000154127, ENSG00000134955, ENSG00000171714, ENSG00000124942, ENSG00000174871, ENSG00000110195, ENSG00000151572, ENSG00000122986, ENSG00000089250, ENSG00000151062, ENSG00000111371, ENSG00000196876, ENSG00000185482, ENSG00000135502, ENSG00000047617, ENSG00000111319, ENSG00000127325, ENSG00000070961, ENSG0000…	KIF5B, MCU, SLC16A12, SLC35G1, GRIK4, UBASH3B, SLC37A2, ANO5, AHNAK, CNIH2, FOLR1, ANO4, HVCN1, NOS1, CACNA2D4, SLC38A1, SCN8A, STAC3, SLC26A10, ANO2, SCNN1A, BEST3, ATP2B1, GAS6, HTR2A, SLC7A7, SLC7A8, ATP10A, GABRA5, GABRB3, SLC12A6, THBS1, PLCB2, SLC30A4, NOX5, CHRNA3, RASGRF1, TMC3, SHISA9, GSG1L, CORO1A, RRAD, SLC9A5, ATP2C2, SLC7A5, SLC43A2, SLC47A1, KCNJ12, CCL2, TRPV3, TRPV1, ATP6V0A1, WN…	any
GO:0120035	regulation of plasma membrane bounded cell projection organization	GO:BP	0.000176321	694	127	ENSG00000099250, ENSG00000165731, ENSG00000107984, ENSG00000148677, ENSG00000137710, ENSG00000176697, ENSG00000026508, ENSG00000148948, ENSG00000110492, ENSG00000134569, ENSG00000110047, ENSG00000068971, ENSG00000151490, ENSG00000188906, ENSG00000018236, ENSG00000135407, ENSG00000155974, ENSG00000139220, ENSG00000132932, ENSG00000102554, ENSG00000178235, ENSG00000137872, ENSG00000156642, ENSG0000…	NRP1, RET, DKK1, ANKRD1, RDX, BDNF, CD44, LRRC4C, MDK, LRP4, EHD1, PPP2R5B, PTPRO, LRRK2, CNTN1, AVIL, GRIP1, PPFIA2, ATP8A2, KLF5, SLITRK1, SEMA6D, NPTN, CHRNA3, SEMA4B, STX1B, PMP22, SCARF1, SERPINF1, ULK2, OMG, GFAP, NTN1, CDH2, APOE, SEMA6B, LRRC4B, CACNG7, CDC42EP5, PALM, EVI5L, AMIGO1, NGF, DRAXIN, PDPN, CHRNB2, EFNA1, TRIM46, PRRX1, DNM3, RGS2, SYT2, AGT, DISC1, NEGR1, LZTS3, PREX1, ITSN1,…	any
GO:1901700	response to oxygen-containing compound	GO:BP	0.000179917	1746	154	ENSG00000099194, ENSG00000165731, ENSG00000107984, ENSG00000122877, ENSG00000184719, ENSG00000137745, ENSG00000023171, ENSG00000176971, ENSG00000185187, ENSG00000175592, ENSG00000062282, ENSG00000089250, ENSG00000188906, ENSG00000079337, ENSG00000070961, ENSG00000011465, ENSG00000133110, ENSG00000136160, ENSG00000129465, ENSG00000186469, ENSG00000185650, ENSG00000170345, ENSG00000119714, ENSG0000…	SCD, RET, DKK1, EGR2, RNLS, MMP13, GRAMD1B, FIBIN, SIGIRR, FOSL1, DGAT2, NOS1, LRRK2, RAPGEF3, ATP2B1, DCN, POSTN, EDNRB, RIPK3, GNG2, ZFP36L1, FOS, GPR68, CHRNA3, PYCARD, TFAP4, MMP2, SERPINF1, RNF112, LGALS9, CCL2, TRPV1, NR1D1, JUP, STAT5A, ATP6V0A1, SOX9, SPHK1, CD68, COLEC12, ACP5, JUNB, GDF15, ZFP36, TGFB1, CEACAM1, FOSB, VCAM1, PTPN22, TNFRSF1B, RAB13, CHRNB2, SHC1, BGLAP, RGS4, TNFSF4, GL…	upregulated
GO:1905114	cell surface receptor signaling pathway involved in cell-cell signaling	GO:BP	0.00018581	633	118	ENSG00000198873, ENSG00000066468, ENSG00000019995, ENSG00000095739, ENSG00000177283, ENSG00000107984, ENSG00000050165, ENSG00000080854, ENSG00000205213, ENSG00000176697, ENSG00000110492, ENSG00000134569, ENSG00000162337, ENSG00000110195, ENSG00000087053, ENSG00000151490, ENSG00000188906, ENSG00000167779, ENSG00000150457, ENSG00000102678, ENSG00000180730, ENSG00000136155, ENSG00000183098, ENSG0000…	GRK5, FGFR2, ZRANB1, BAMBI, FZD8, DKK1, DKK3, IGSF9B, LGR4, BDNF, MDK, LRP4, LRP5, FOLR1, MTMR2, PTPRO, LRRK2, IGFBP6, LATS2, FGF9, SHISA2, SCEL, GPC6, NDRG2, GNG2, FERMT2, BMP4, GABRB3, PLCB2, SMAD3, C15orf59, CHRNA3, GPRC5B, STX1B, NKD1, GNAO1, PARD6A, ABAT, HIC1, TRPV1, TAX1BP3, JUP, MPP2, SMURF2, AXIN2, SOX9, SLC9A3R1, GRIN2C, NXN, APCDD1, CDH2, ALPK2, APOE, DACT3, PLEKHA4, C3, CELSR2, DRAXIN…	any
GO:0006820	anion transport	GO:BP	0.000194694	654	121	ENSG00000152779, ENSG00000134955, ENSG00000171714, ENSG00000176697, ENSG00000110195, ENSG00000166394, ENSG00000151572, ENSG00000134548, ENSG00000111371, ENSG00000135502, ENSG00000047617, ENSG00000127325, ENSG00000139220, ENSG00000132932, ENSG00000155465, ENSG00000092068, ENSG00000183032, ENSG00000168398, ENSG00000206190, ENSG00000186297, ENSG00000166206, ENSG00000140199, ENSG00000137801, ENSG0000…	SLC16A12, SLC37A2, ANO5, BDNF, FOLR1, CYB5R2, ANO4, C12orf39, SLC38A1, SLC26A10, ANO2, BEST3, PPFIA2, ATP8A2, SLC7A7, SLC7A8, SLC25A21, BDKRB2, ATP10A, GABRA5, GABRB3, SLC12A6, THBS1, TNFAIP8L3, CA12, STARD5, NMB, SLC9A5, ABAT, SLC7A5, SLC43A2, PROCA1, TRPV1, WNK4, ABCC3, ACE, PITPNM3, PITPNC1, TTYH2, SLC9A3R1, GIPC1, CYP4F2, CEACAM1, KCNN4, APOE, TTYH1, SLC6A17, SLC16A4, PDPN, RGS4, MPC2, RGS2, …	any
GO:0005865	striated muscle thin filament	GO:CC	0.000195966	25	10	ENSG00000128872, ENSG00000138594, ENSG00000140416, ENSG00000101605, ENSG00000134775, ENSG00000118194, ENSG00000159173, ENSG00000163431, ENSG00000114854, ENSG00000198467	TMOD2, TMOD3, TPM1, MYOM1, FHOD3, TNNT2, TNNI1, LMOD1, TNNC1, TPM2	downregulated
GO:0099512	supramolecular fiber	GO:CC	0.000199541	993	166	ENSG00000078114, ENSG00000170759, ENSG00000099250, ENSG00000138347, ENSG00000122367, ENSG00000107796, ENSG00000148677, ENSG00000165887, ENSG00000187240, ENSG00000109846, ENSG00000166250, ENSG00000124942, ENSG00000149499, ENSG00000139354, ENSG00000139112, ENSG00000089250, ENSG00000057294, ENSG00000139116, ENSG00000196876, ENSG00000167767, ENSG00000170442, ENSG00000205426, ENSG00000170454, ENSG0000…	NEBL, KIF5B, NRP1, MYPN, LDB3, ACTA2, ANKRD1, ANKRD2, DYNC2H1, CRYAB, CLMP, AHNAK, EML3, GAS2L3, GABARAPL1, NOS1, PKP2, KIF21A, SCN8A, KRT80, KRT86, KRT81, KRT75, MYL6B, KIF5A, PAWR, MFAP5, DCN, TUBA3C, KATNAL1, LCP1, AHNAK2, CFL2, FERMT2, ACTN1, FMN1, ACTC1, TMOD2, TMOD3, MYZAP, TPM1, FAM154B, SYNM, CORO1A, PPL, MMP2, ENKD1, COTL1, TUBB3, TUBB3, MYH8, MYH1, MYH2, MYH3, SPECC1, KRTAP1-5, KRTAP2-3…	any
GO:0042060	wound healing	GO:BP	0.000203908	584	67	ENSG00000122861, ENSG00000064201, ENSG00000026508, ENSG00000110492, ENSG00000213931, ENSG00000196565, ENSG00000149131, ENSG00000011347, ENSG00000149781, ENSG00000111252, ENSG00000139567, ENSG00000127324, ENSG00000011465, ENSG00000175899, ENSG00000133110, ENSG00000186469, ENSG00000197249, ENSG00000166949, ENSG00000118898, ENSG00000186115, ENSG00000171903, ENSG00000127533, ENSG00000105329, ENSG0000…	PLAU, TSPAN32, CD44, MDK, HBE1, HBG2, SERPING1, SYT7, FERMT3, SH2B3, ACVRL1, TSPAN8, DCN, A2M, POSTN, GNG2, SERPINA1, SMAD3, PPL, CYP4F2, CYP4F11, F2RL3, TGFB1, CEACAM1, VAV3, FCER1G, CYR61, FOXA2, P2RX6, CELSR1, MERTK, FAP, TMEFF2, FN1, SLC11A1, SERPINE2, TGFA, MYLK, P2RY1, APOD, RP5-966M1.6, DCBLD2, PPP3CA, FGB, FGG, PDGFRA, EREG, IRF1, ITGA2, F2RL2, GJA1, TNFAIP3, NOTCH4, ITPR3, F13A1, EYS, CD…	upregulated
GO:0060429	epithelium development	GO:BP	0.000207488	1319	214	ENSG00000066468, ENSG00000187908, ENSG00000170430, ENSG00000099250, ENSG00000165731, ENSG00000107984, ENSG00000107796, ENSG00000137710, ENSG00000149591, ENSG00000205213, ENSG00000176697, ENSG00000007372, ENSG00000026508, ENSG00000184363, ENSG00000110492, ENSG00000134569, ENSG00000133321, ENSG00000166340, ENSG00000166341, ENSG00000162337, ENSG00000110195, ENSG00000151490, ENSG00000057294, ENSG0000…	FGFR2, DMBT1, MGMT, NRP1, RET, DKK1, ACTA2, RDX, TAGLN, LGR4, BDNF, PAX6, CD44, PKP3, MDK, LRP4, RARRES3, TPP1, DCHS1, LRP5, FOLR1, PTPRO, PKP2, RAPGEF3, ACVRL1, KRT80, KRT86, KRT81, KRT75, HOXC13, PTPRQ, BTG1, NTN4, TNFRSF19, CDX2, KLF5, SCEL, SLITRK6, GPC6, MMP14, AJUBA, TGM1, BMP4, LGALS3, MPP5, ZFP36L1, PCSK6, TJP1, FMN1, SPINT1, FGF7, SMAD3, NR2F2, ITGAX, PPL, NKD1, IRX3, PARD6A, HYDIN, CCDC…	any
GO:0042327	positive regulation of phosphorylation	GO:BP	0.000209046	1107	185	ENSG00000138166, ENSG00000066468, ENSG00000151651, ENSG00000165757, ENSG00000107968, ENSG00000099250, ENSG00000177283, ENSG00000165731, ENSG00000107984, ENSG00000150782, ENSG00000176697, ENSG00000026508, ENSG00000135362, ENSG00000134569, ENSG00000121236, ENSG00000089250, ENSG00000013588, ENSG00000188906, ENSG00000018236, ENSG00000079337, ENSG00000139567, ENSG00000065361, ENSG00000166886, ENSG0000…	DUSP5, FGFR2, ADAM8, KIAA1462, MAP3K8, NRP1, FZD8, RET, DKK1, IL18, BDNF, CD44, PRR5L, LRP4, TRIM6, NOS1, GPRC5A, LRRK2, CNTN1, RAPGEF3, ACVRL1, ERBB3, NAB2, HMGA2, DUSP6, GAS6, FGF9, TNFRSF19, FLT1, RGCC, HTR2A, EDNRB, AJUBA, RIPK3, BMP4, RPS6KA5, THBS1, FGF7, TNFAIP8L3, NPTN, CHRNA3, IGF1R, GPRC5B, NUPR1, LAT, PYCARD, DOK4, ADORA2B, LGALS9, CCL2, CDC6, TOM1L1, MMD, ACE, AXIN2, FAM20A, SOX9, SPH…	any
GO:0007268	chemical synaptic transmission	GO:BP	0.000213714	717	130	ENSG00000170759, ENSG00000107984, ENSG00000122877, ENSG00000122862, ENSG00000149403, ENSG00000080854, ENSG00000176697, ENSG00000148948, ENSG00000011347, ENSG00000110076, ENSG00000174871, ENSG00000174791, ENSG00000166405, ENSG00000087053, ENSG00000060709, ENSG00000111450, ENSG00000188906, ENSG00000185482, ENSG00000155980, ENSG00000111052, ENSG00000139220, ENSG00000102468, ENSG00000118946, ENSG0000…	KIF5B, DKK1, EGR2, SRGN, GRIK4, IGSF9B, BDNF, LRRC4C, SYT7, NRXN2, CNIH2, RIN1, RIC3, MTMR2, RIMBP2, STX2, LRRK2, STAC3, KIF5A, LIN7A, PPFIA2, HTR2A, PCDH17, BEGAIN, AKAP5, LGMN, GABRA5, GABRB3, SLC12A6, TMOD2, NPTN, C15orf59, CHRNA3, RASGRF1, MCTP2, SHISA9, RAB26, PRRT2, STX1B, ABAT, PMP22, ADORA2B, CCL2, TRPV1, MPP2, GFAP, MYCBPAP, CACNG4, GRIN2C, CDH2, GIPC1, TSHZ3, APOE, LIN7B, NTNG1, NGF, CH…	any
GO:0098916	anterograde trans-synaptic signaling	GO:BP	0.000213714	717	130	ENSG00000170759, ENSG00000107984, ENSG00000122877, ENSG00000122862, ENSG00000149403, ENSG00000080854, ENSG00000176697, ENSG00000148948, ENSG00000011347, ENSG00000110076, ENSG00000174871, ENSG00000174791, ENSG00000166405, ENSG00000087053, ENSG00000060709, ENSG00000111450, ENSG00000188906, ENSG00000185482, ENSG00000155980, ENSG00000111052, ENSG00000139220, ENSG00000102468, ENSG00000118946, ENSG0000…	KIF5B, DKK1, EGR2, SRGN, GRIK4, IGSF9B, BDNF, LRRC4C, SYT7, NRXN2, CNIH2, RIN1, RIC3, MTMR2, RIMBP2, STX2, LRRK2, STAC3, KIF5A, LIN7A, PPFIA2, HTR2A, PCDH17, BEGAIN, AKAP5, LGMN, GABRA5, GABRB3, SLC12A6, TMOD2, NPTN, C15orf59, CHRNA3, RASGRF1, MCTP2, SHISA9, RAB26, PRRT2, STX1B, ABAT, PMP22, ADORA2B, CCL2, TRPV1, MPP2, GFAP, MYCBPAP, CACNG4, GRIN2C, CDH2, GIPC1, TSHZ3, APOE, LIN7B, NTNG1, NGF, CH…	any
GO:0044093	positive regulation of molecular function	GO:BP	0.00021828	1822	281	ENSG00000138166, ENSG00000066468, ENSG00000151651, ENSG00000148484, ENSG00000095739, ENSG00000107968, ENSG00000170759, ENSG00000099250, ENSG00000177283, ENSG00000165731, ENSG00000128805, ENSG00000107984, ENSG00000150347, ENSG00000107738, ENSG00000108239, ENSG00000170276, ENSG00000150782, ENSG00000137642, ENSG00000259571, ENSG00000176697, ENSG00000007372, ENSG00000026508, ENSG00000121236, ENSG0000…	DUSP5, FGFR2, ADAM8, RSU1, BAMBI, MAP3K8, KIF5B, NRP1, FZD8, RET, ARHGAP22, DKK1, ARID5B, C10orf54, TBC1D12, HSPB2, IL18, SORL1, BLID, BDNF, PAX6, CD44, TRIM6, RARRES3, RASGRP2, PPP2R5B, FOSL1, RIN1, LRP5, PIDD, NOS1, GPRC5A, LRRK2, RAPGEF3, ERBB3, NAB2, STAC3, PPM1H, PLEKHG6, HMGA2, DUSP6, GAS6, FLT1, RGCC, HTR2A, AJUBA, RIPK3, SEC23A, BMP4, GCH1, AKAP5, GPR65, RPS6KA5, LGMN, THBS1, PLCB2, TNFAI…	any
GO:1903522	regulation of blood circulation	GO:BP	0.000224207	302	67	ENSG00000184719, ENSG00000167332, ENSG00000089250, ENSG00000151062, ENSG00000134548, ENSG00000057294, ENSG00000070961, ENSG00000102468, ENSG00000131979, ENSG00000168398, ENSG00000140416, ENSG00000087258, ENSG00000184185, ENSG00000196689, ENSG00000173801, ENSG00000159640, ENSG00000075461, ENSG00000171298, ENSG00000046604, ENSG00000182324, ENSG00000105605, ENSG00000198929, ENSG00000117152, ENSG0000…	RNLS, OR51E2, NOS1, CACNA2D4, C12orf39, PKP2, ATP2B1, HTR2A, GCH1, BDKRB2, TPM1, GNAO1, KCNJ12, TRPV1, JUP, ACE, CACNG4, GAA, DSG2, KCNJ14, CACNG7, NOS1AP, RGS4, ATP1B1, PTGS2, RGS2, TNNT2, ADORA1, TGFB2, AGT, KCNK1, CHRM3, CYP2J2, PDE4B, SNTA1, ADRA1D, ADA, KCNK15, CACNB4, PER2, FKBP1B, UCN, SLC8A1, CALM2, SCN5A, OXTR, FGB, FGG, KCNIP4, ADRA2C, NMU, KCNN2, HBEGF, PDE4D, GJA1, EDN1, TRDN, CTGF, I…	any
GO:0016460	myosin II complex	GO:CC	0.000228562	21	12	ENSG00000196465, ENSG00000133020, ENSG00000109061, ENSG00000125414, ENSG00000109063, ENSG00000133026, ENSG00000101608, ENSG00000118680, ENSG00000105357, ENSG00000101335, ENSG00000168530, ENSG00000064042	MYL6B, MYH8, MYH1, MYH2, MYH3, MYH10, MYL12A, MYL12B, MYH14, MYL9, MYL1, LIMCH1	any
GO:0044057	regulation of system process	GO:BP	0.000235505	623	70	ENSG00000184719, ENSG00000080854, ENSG00000124920, ENSG00000174871, ENSG00000089250, ENSG00000151062, ENSG00000188906, ENSG00000070961, ENSG00000136160, ENSG00000183092, ENSG00000136367, ENSG00000168398, ENSG00000166949, ENSG00000080644, ENSG00000099365, ENSG00000140678, ENSG00000170425, ENSG00000196689, ENSG00000173801, ENSG00000126562, ENSG00000159640, ENSG00000176170, ENSG00000171298, ENSG0000…	RNLS, IGSF9B, MYRF, CNIH2, NOS1, CACNA2D4, LRRK2, ATP2B1, EDNRB, BEGAIN, ZFHX2, BDKRB2, SMAD3, CHRNA3, STX1B, ITGAX, ADORA2B, TRPV1, JUP, WNK4, ACE, SPHK1, GAA, TSHZ3, KCNJ14, TNFRSF1B, NOS1AP, RGS4, PTGS2, RGS2, KCNK1, CHRM3, EPB41, CYP2J2, ERRFI1, ADRA1D, ADA, KCNK15, OPRL1, CALCRL, PER2, FKBP1B, UCN, SCN5A, PPP3CA, FGB, FGG, KCNIP4, KCNN2, C1QTNF3, ITGA2, PDE4D, GJA1, TRDN, ITPR3, RELN, DOCK4,…	upregulated
GO:0048584	positive regulation of response to stimulus	GO:BP	0.000237661	2542	208	ENSG00000138166, ENSG00000151651, ENSG00000165757, ENSG00000099250, ENSG00000177283, ENSG00000165731, ENSG00000107984, ENSG00000165471, ENSG00000107731, ENSG00000108175, ENSG00000187240, ENSG00000080854, ENSG00000026508, ENSG00000110492, ENSG00000149131, ENSG00000111252, ENSG00000089250, ENSG00000188906, ENSG00000139567, ENSG00000135426, ENSG00000149948, ENSG00000182326, ENSG00000159403, ENSG0000…	DUSP5, ADAM8, KIAA1462, NRP1, FZD8, RET, DKK1, MBL2, UNC5B, ZMIZ1, DYNC2H1, IGSF9B, CD44, MDK, SERPING1, SH2B3, NOS1, LRRK2, ACVRL1, TESPA1, HMGA2, C1S, C1R, C1RL, C3AR1, DUSP6, DCN, A2M, TNFSF13B, TNFRSF19, RGCC, LPAR6, GPR18, RIPK3, LGALS3, RPS6KA5, GPR68, FGF7, TNFAIP8L3, DAPK2, SMAD3, LAT, STX1B, PYCARD, TFAP4, GPR56, MC1R, SCARF1, ADORA2B, HIC1, LGALS9, CCL2, GRB7, NR1D1, JUP, DHX58, SEPT4, …	upregulated
GO:0005518	collagen binding	GO:MF	0.000244974	70	17	ENSG00000137745, ENSG00000026508, ENSG00000011465, ENSG00000166949, ENSG00000205336, ENSG00000143127, ENSG00000116962, ENSG00000142156, ENSG00000142173, ENSG00000115414, ENSG00000154175, ENSG00000196104, ENSG00000120708, ENSG00000152377, ENSG00000164171, ENSG00000106333, ENSG00000164733	MMP13, CD44, DCN, SMAD3, GPR56, ITGA10, NID1, COL6A1, COL6A2, FN1, ABI3BP, SPOCK3, TGFBI, SPOCK1, ITGA2, PCOLCE, CTSB	upregulated
GO:0030425	dendrite	GO:CC	0.000256701	622	113	ENSG00000170759, ENSG00000165731, ENSG00000109846, ENSG00000149571, ENSG00000080854, ENSG00000176697, ENSG00000134569, ENSG00000011347, ENSG00000174871, ENSG00000174791, ENSG00000087053, ENSG00000139112, ENSG00000089250, ENSG00000151490, ENSG00000188906, ENSG00000139567, ENSG00000155980, ENSG00000155974, ENSG00000139220, ENSG00000102468, ENSG00000152767, ENSG00000020577, ENSG00000179841, ENSG0000…	KIF5B, RET, CRYAB, KIRREL3, IGSF9B, BDNF, LRP4, SYT7, CNIH2, RIN1, MTMR2, GABARAPL1, NOS1, PTPRO, LRRK2, ACVRL1, KIF5A, GRIP1, PPFIA2, HTR2A, FARP1, SAMD4A, AKAP5, GABRA5, NPTN, CHRNA3, ABHD17C, PRRT2, GNAO1, TUBB3, TRPV1, PLXDC1, NR1D1, MPP2, MYH10, GIPC1, ATCAY, APOE, KCNJ14, PALM, PALMD, SORT1, AMIGO1, NGF, BGLAP, DNM3, ADORA1, KIF17, CNIH3, KCNK1, HTR1D, ACTN2, CHRM3, PLK3, PDE4B, TTLL7, CNN3…	any
GO:0002009	morphogenesis of an epithelium	GO:BP	0.000271903	556	106	ENSG00000066468, ENSG00000099250, ENSG00000165731, ENSG00000107984, ENSG00000205213, ENSG00000026508, ENSG00000110492, ENSG00000166341, ENSG00000162337, ENSG00000110195, ENSG00000139567, ENSG00000074527, ENSG00000183098, ENSG00000157227, ENSG00000129474, ENSG00000125378, ENSG00000072415, ENSG00000248905, ENSG00000166145, ENSG00000140285, ENSG00000166949, ENSG00000140678, ENSG00000140807, ENSG0000…	FGFR2, NRP1, RET, DKK1, LGR4, CD44, MDK, DCHS1, LRP5, FOLR1, ACVRL1, NTN4, GPC6, MMP14, AJUBA, BMP4, MPP5, FMN1, SPINT1, FGF7, SMAD3, ITGAX, NKD1, IRX3, PARD6A, KRT17, WNK4, CCDC103, HOXB4, HOXB7, SMURF2, SOX9, SLC9A3R1, CCDC40, NTN1, TGFB1, CEACAM1, PLEKHA4, CAMSAP3, CELSR2, CSF1, PDPN, PBX1, TGFB2, AGT, KIF26B, BCL10, CYR61, TGM2, SALL4, BMP2, CELSR1, EPB41L5, GLI2, LRP2, FRZB, TMEFF2, RHOB, IF…	any
GO:0098794	postsynapse	GO:CC	0.000275264	638	68	ENSG00000122862, ENSG00000109846, ENSG00000149403, ENSG00000087053, ENSG00000151490, ENSG00000018236, ENSG00000155974, ENSG00000132970, ENSG00000133083, ENSG00000102468, ENSG00000118946, ENSG00000178695, ENSG00000152767, ENSG00000179841, ENSG00000186297, ENSG00000166206, ENSG00000156642, ENSG00000205363, ENSG00000140600, ENSG00000237515, ENSG00000169181, ENSG00000108852, ENSG00000108370, ENSG0000…	SRGN, CRYAB, GRIK4, MTMR2, PTPRO, CNTN1, GRIP1, WASF3, DCLK1, HTR2A, PCDH17, KCTD12, FARP1, AKAP5, GABRA5, GABRB3, NPTN, C15orf59, SH3GL3, SHISA9, GSG1L, MPP2, RGS9, CACNG4, MYH10, CDH2, EPB41L3, GIPC1, LIN7B, LRRC4B, CACNG7, PALM, PALMD, DNM3, ADORA1, DISC1, DNAJC6, PDE4B, CNN3, LZTS3, ITSN1, BCR, NEFH, MAPK8IP2, PKP4, MAP2, ERBB4, KIF1A, SLC8A1, TMEM108, CSPG5, WNT5A, GLRB, ADRA2C, KCTD16, CLTB…	downregulated
GO:0005737	cytoplasm	GO:CC	0.000275287	11634	1452	ENSG00000107554, ENSG00000099194, ENSG00000065621, ENSG00000108018, ENSG00000138166, ENSG00000197142, ENSG00000099204, ENSG00000151892, ENSG00000198873, ENSG00000066468, ENSG00000187908, ENSG00000182022, ENSG00000019995, ENSG00000188385, ENSG00000151640, ENSG00000151651, ENSG00000148803, ENSG00000152463, ENSG00000148484, ENSG00000107611, ENSG00000165996, ENSG00000204740, ENSG00000078114, ENSG0000…	DNMBP, SCD, GSTO2, SORCS1, DUSP5, ACSL5, ABLIM1, GFRA1, GRK5, FGFR2, DMBT1, CHST15, ZRANB1, JAKMIP3, DPYSL4, ADAM8, FUOM, OLAH, RSU1, CUBN, PTPLA, MALRD1, NEBL, RAB18, BAMBI, KIAA1462, MAP3K8, KIF5B, NRP1, FZD8, KLF6, RET, C10orf10, SYT15, FRMPD2, ARHGAP22, SGMS1, DKK1, RHOBTB1, C10orf107, EGR2, HERC4, MYPN, SRGN, TSPAN15, PALD1, CHST3, MCU, PLAU, ZMIZ1, MAT1A, TSPAN14, LDB3, PAPSS2, ACTA2, ANKRD…	any
GO:0032432	actin filament bundle	GO:CC	0.000275525	76	25	ENSG00000099204, ENSG00000078114, ENSG00000122367, ENSG00000109846, ENSG00000136167, ENSG00000073712, ENSG00000072110, ENSG00000140416, ENSG00000135723, ENSG00000183688, ENSG00000133026, ENSG00000101608, ENSG00000118680, ENSG00000105357, ENSG00000101335, ENSG00000163092, ENSG00000065534, ENSG00000120756, ENSG00000172403, ENSG00000154553, ENSG00000064042, ENSG00000196923, ENSG00000120913, ENSG0000…	ABLIM1, NEBL, LDB3, CRYAB, LCP1, FERMT2, ACTN1, TPM1, FHOD1, FAM101B, MYH10, MYL12A, MYL12B, MYH14, MYL9, XIRP2, MYLK, PLS1, SYNPO2, PDLIM3, LIMCH1, PDLIM7, PDLIM2, TEK, PGM5	any
GO:0032101	regulation of response to external stimulus	GO:BP	0.000280473	1132	109	ENSG00000151651, ENSG00000099250, ENSG00000122861, ENSG00000064201, ENSG00000185187, ENSG00000110492, ENSG00000149131, ENSG00000111252, ENSG00000188906, ENSG00000127324, ENSG00000171860, ENSG00000175899, ENSG00000136160, ENSG00000125245, ENSG00000100784, ENSG00000137872, ENSG00000035664, ENSG00000166949, ENSG00000185033, ENSG00000103490, ENSG00000074660, ENSG00000170425, ENSG00000132386, ENSG0000…	ADAM8, NRP1, PLAU, TSPAN32, SIGIRR, MDK, SERPING1, SH2B3, LRRK2, TSPAN8, C3AR1, A2M, EDNRB, GPR18, RPS6KA5, SEMA6D, DAPK2, SMAD3, SEMA4B, PYCARD, SCARF1, ADORA2B, SERPINF1, LGALS9, CCL2, NR1D1, DHX58, SPHK1, RNF125, COLEC12, SERPINB4, ACP5, ZFP36, CEACAM1, RELB, SEMA6B, C5AR2, C3, CSF1, PTPN22, TNFRSF1B, DCST1, MUC1, IFI16, FCER1G, SH2D1B, TNFSF4, PTGS2, PTPRC, IL23R, BCL10, FOXA2, TGM2, ADA, GGT…	upregulated
GO:0003008	system process	GO:BP	0.000292884	2227	333	ENSG00000099204, ENSG00000107984, ENSG00000122877, ENSG00000184719, ENSG00000107796, ENSG00000165887, ENSG00000109846, ENSG00000076706, ENSG00000151702, ENSG00000080854, ENSG00000176697, ENSG00000007372, ENSG00000110492, ENSG00000167332, ENSG00000167355, ENSG00000149131, ENSG00000124920, ENSG00000149489, ENSG00000110076, ENSG00000175592, ENSG00000174871, ENSG00000174791, ENSG00000166340, ENSG0000…	ABLIM1, DKK1, EGR2, RNLS, ACTA2, ANKRD2, CRYAB, MCAM, FLI1, IGSF9B, BDNF, PAX6, MDK, OR51E2, AC104389.28, SERPING1, MYRF, ROM1, NRXN2, FOSL1, CNIH2, RIN1, TPP1, LRP5, MTMR2, CNTN5, CRY1, TAS2R30, NOS1, SRRM4, PTPRO, CACNA2D4, C12orf39, PKP2, LRRK2, SCN8A, ACVRL1, RDH5, MYL6B, MYL6, STAC3, SCNN1A, PTPRQ, C3AR1, ATP2B1, GAS6, ATP8A2, WASF3, POSTN, HTR2A, EDNRB, SLITRK6, BEGAIN, ZFHX2, BMP4, GCH1, F…	any
GO:0097447	dendritic tree	GO:CC	0.000302312	624	113	ENSG00000170759, ENSG00000165731, ENSG00000109846, ENSG00000149571, ENSG00000080854, ENSG00000176697, ENSG00000134569, ENSG00000011347, ENSG00000174871, ENSG00000174791, ENSG00000087053, ENSG00000139112, ENSG00000089250, ENSG00000151490, ENSG00000188906, ENSG00000139567, ENSG00000155980, ENSG00000155974, ENSG00000139220, ENSG00000102468, ENSG00000152767, ENSG00000020577, ENSG00000179841, ENSG0000…	KIF5B, RET, CRYAB, KIRREL3, IGSF9B, BDNF, LRP4, SYT7, CNIH2, RIN1, MTMR2, GABARAPL1, NOS1, PTPRO, LRRK2, ACVRL1, KIF5A, GRIP1, PPFIA2, HTR2A, FARP1, SAMD4A, AKAP5, GABRA5, NPTN, CHRNA3, ABHD17C, PRRT2, GNAO1, TUBB3, TRPV1, PLXDC1, NR1D1, MPP2, MYH10, GIPC1, ATCAY, APOE, KCNJ14, PALM, PALMD, SORT1, AMIGO1, NGF, BGLAP, DNM3, ADORA1, KIF17, CNIH3, KCNK1, HTR1D, ACTN2, CHRM3, PLK3, PDE4B, TTLL7, CNN3…	any
GO:0050767	regulation of neurogenesis	GO:BP	0.000312359	856	88	ENSG00000148803, ENSG00000099250, ENSG00000165731, ENSG00000107984, ENSG00000148948, ENSG00000110492, ENSG00000134569, ENSG00000089250, ENSG00000123095, ENSG00000188906, ENSG00000135407, ENSG00000139220, ENSG00000136160, ENSG00000178235, ENSG00000166145, ENSG00000137872, ENSG00000080644, ENSG00000185033, ENSG00000099365, ENSG00000177508, ENSG00000205336, ENSG00000074660, ENSG00000132386, ENSG0000…	FUOM, NRP1, RET, DKK1, LRRC4C, MDK, LRP4, NOS1, BHLHE41, LRRK2, AVIL, PPFIA2, EDNRB, SLITRK1, SPINT1, SEMA6D, CHRNA3, SEMA4B, STX1B, IRX3, GPR56, SCARF1, SERPINF1, RNF112, OMG, NR1D1, GFAP, MMD, SOX9, HES7, TGFB1, SEMA6B, CSF1, DRAXIN, TNFRSF1B, CHRNB2, TRIM46, PBX1, PRRX1, RGS2, SYT2, TP73, GDF5, PREX1, BMP2, MAP4K4, FN1, SERPINE2, PER2, FKBP1B, PPARG, IGSF10, MME, SERPINI1, BCL6, RARB, PPP3CA, …	upregulated
GO:0051046	regulation of secretion	GO:BP	0.000316751	855	149	ENSG00000151651, ENSG00000170759, ENSG00000204176, ENSG00000122862, ENSG00000156026, ENSG00000148677, ENSG00000182985, ENSG00000137642, ENSG00000205213, ENSG00000019505, ENSG00000110492, ENSG00000167332, ENSG00000121236, ENSG00000011347, ENSG00000162337, ENSG00000008405, ENSG00000111335, ENSG00000134548, ENSG00000188906, ENSG00000079337, ENSG00000065361, ENSG00000139220, ENSG00000183087, ENSG0000…	ADAM8, KIF5B, SYT15, SRGN, MCU, ANKRD1, CADM1, SORL1, LGR4, SYT13, MDK, OR51E2, TRIM6, SYT7, LRP5, CRY1, OAS2, C12orf39, LRRK2, RAPGEF3, ERBB3, PPFIA2, GAS6, POSTN, RGCC, HTR2A, EDNRB, STXBP6, GPR68, CHRNA3, NMB, MCTP2, SSTR5, RAB26, PRRT2, STX1B, PYCARD, PARD6A, ABAT, ADORA2B, LGALS9, TRPV1, NR1D1, WNK4, SEPT4, SLC9A3R1, LLGL2, UNC13D, MYH10, MYOM1, RAB27B, GIPC1, EMR2, CYP4F2, CD22, CEACAM1, KC…	any
GO:0098984	neuron to neuron synapse	GO:CC	0.000327448	372	46	ENSG00000109846, ENSG00000149403, ENSG00000087053, ENSG00000151490, ENSG00000155974, ENSG00000133083, ENSG00000179841, ENSG00000156642, ENSG00000205363, ENSG00000140600, ENSG00000237515, ENSG00000169181, ENSG00000108852, ENSG00000108370, ENSG00000075461, ENSG00000170558, ENSG00000082397, ENSG00000104863, ENSG00000131409, ENSG00000105605, ENSG00000099864, ENSG00000197959, ENSG00000163485, ENSG0000…	CRYAB, GRIK4, MTMR2, PTPRO, GRIP1, DCLK1, AKAP5, NPTN, C15orf59, SH3GL3, SHISA9, GSG1L, MPP2, RGS9, CACNG4, CDH2, EPB41L3, LIN7B, LRRC4B, CACNG7, PALM, DNM3, ADORA1, DISC1, DNAJC6, PDE4B, CNN3, LZTS3, BCR, NEFH, MAPK8IP2, PKP4, MAP2, ERBB4, TMEM108, ADRA2C, CAP2, NRCAM, GPER1, DGKI, PCLO, PPP1R9A, LYN, FMR1, CNKSR2, ARHGEF9	downregulated
GO:0043901	negative regulation of multi-organism process	GO:BP	0.000328397	227	35	ENSG00000165471, ENSG00000185201, ENSG00000185885, ENSG00000142089, ENSG00000185187, ENSG00000149131, ENSG00000089127, ENSG00000111335, ENSG00000135114, ENSG00000174718, ENSG00000149948, ENSG00000175899, ENSG00000172183, ENSG00000090447, ENSG00000168961, ENSG00000108771, ENSG00000101695, ENSG00000206073, ENSG00000128016, ENSG00000079385, ENSG00000163357, ENSG00000163565, ENSG00000196839, ENSG0000…	MBL2, IFITM2, IFITM1, IFITM3, SIGIRR, SERPING1, OAS1, OAS2, OASL, KIAA1551, HMGA2, A2M, ISG20, TFAP4, LGALS9, DHX58, RNF125, SERPINB4, ZFP36, CEACAM1, DCST1, IFI16, ADA, MX1, APOBEC3D, APOBEC3G, ACVR1C, PPARG, PTX3, SPINK5, GJA1, TNFAIP3, TRIB1, MIR221, TIMP1	upregulated
GO:0005581	collagen trimer	GO:CC	0.000357222	97	29	ENSG00000165471, ENSG00000137745, ENSG00000186897, ENSG00000011465, ENSG00000186417, ENSG00000132205, ENSG00000158270, ENSG00000183287, ENSG00000060718, ENSG00000084636, ENSG00000171812, ENSG00000142156, ENSG00000142173, ENSG00000186998, ENSG00000133466, ENSG00000081052, ENSG00000169031, ENSG00000163359, ENSG00000138080, ENSG00000206561, ENSG00000145861, ENSG00000082196, ENSG00000123500, ENSG0000…	MBL2, MMP13, C1QL4, DCN, GLDN, EMILIN2, COLEC12, CCBE1, COL11A1, COL16A1, COL8A2, COL6A1, COL6A2, EMID1, C1QTNF6, COL4A4, COL4A3, COL6A3, EMILIN1, COLQ, C1QTNF2, C1QTNF3, COL10A1, COL28A1, CTHRC1, MSR1, COL27A1, COL4A5, TIMP1	any
GO:0070161	anchoring junction	GO:CC	0.000358086	785	79	ENSG00000148484, ENSG00000150054, ENSG00000137710, ENSG00000204381, ENSG00000182985, ENSG00000076706, ENSG00000133818, ENSG00000184363, ENSG00000057294, ENSG00000102755, ENSG00000136167, ENSG00000129474, ENSG00000073712, ENSG00000072415, ENSG00000072110, ENSG00000104067, ENSG00000159251, ENSG00000128849, ENSG00000182253, ENSG00000140832, ENSG00000109061, ENSG00000125414, ENSG00000109099, ENSG0000…	RSU1, MPP7, RDX, LAYN, CADM1, MCAM, RRAS2, PKP3, PKP2, FLT1, LCP1, AJUBA, FERMT2, MPP5, ACTN1, TJP1, ACTC1, CGNL1, SYNM, MARVELD3, MYH1, MYH2, PMP22, PLXDC1, CDH2, DSG2, EPB41L3, PTPRM, CNN1, WTIP, PVR, LIN7B, CAMSAP3, PIP5K1A, CGN, MPZL1, ATP1B1, ARPC5, CSRP1, COL16A1, GJB3, NEXN, CNN3, PARD6B, EPB41L5, LIMS2, PKP4, RHOB, SLC8A1, CCDC85A, CLDN1, FRMD4B, SYNPO2, FGFR3, CLDN22, SORBS2, ITK, PDLIM7…	downregulated
GO:0050840	extracellular matrix binding	GO:MF	0.00038048	57	15	ENSG00000011465, ENSG00000131981, ENSG00000198732, ENSG00000205336, ENSG00000187244, ENSG00000116962, ENSG00000142871, ENSG00000196104, ENSG00000118785, ENSG00000120708, ENSG00000152377, ENSG00000164171, ENSG00000112715, ENSG00000185585, ENSG00000182492	DCN, LGALS3, SMOC1, GPR56, BCAM, NID1, CYR61, SPOCK3, SPP1, TGFBI, SPOCK1, ITGA2, VEGFA, OLFML2A, BGN	upregulated
GO:0031644	regulation of nervous system process	GO:BP	0.000386655	142	39	ENSG00000080854, ENSG00000124920, ENSG00000174871, ENSG00000087053, ENSG00000134548, ENSG00000188906, ENSG00000132970, ENSG00000136160, ENSG00000183092, ENSG00000136367, ENSG00000237515, ENSG00000099365, ENSG00000140678, ENSG00000183044, ENSG00000075461, ENSG00000028137, ENSG00000117152, ENSG00000163485, ENSG00000135744, ENSG00000077984, ENSG00000125510, ENSG00000179915, ENSG00000074416, ENSG0000…	IGSF9B, MYRF, CNIH2, MTMR2, C12orf39, LRRK2, WASF3, EDNRB, BEGAIN, ZFHX2, SHISA9, STX1B, ITGAX, ABAT, CACNG4, TNFRSF1B, RGS4, ADORA1, AGT, CST7, OPRL1, NRXN1, MGLL, TMEM108, ADRA2C, NMU, ITGA2, EDN1, TNFRSF21, RIMS1, RELN, STX1A, HGF, RIMS2, NOV, FABP5, HTR2C, FMR1, NLGN4X	any
GO:0043005	neuron projection	GO:CC	0.000413118	1376	122	ENSG00000170759, ENSG00000137710, ENSG00000109846, ENSG00000149571, ENSG00000176697, ENSG00000068831, ENSG00000166405, ENSG00000087053, ENSG00000139112, ENSG00000151490, ENSG00000111371, ENSG00000196876, ENSG00000155974, ENSG00000139287, ENSG00000132932, ENSG00000102468, ENSG00000152767, ENSG00000165795, ENSG00000020577, ENSG00000131979, ENSG00000179841, ENSG00000072415, ENSG00000139985, ENSG0000…	KIF5B, RDX, CRYAB, KIRREL3, BDNF, RASGRP2, RIC3, MTMR2, GABARAPL1, PTPRO, SLC38A1, SCN8A, GRIP1, TPH2, ATP8A2, HTR2A, FARP1, NDRG2, SAMD4A, GCH1, AKAP5, MPP5, ADAM21, GABRA5, GABRB3, TMOD2, NPTN, RASGRF1, IGF1R, SHISA9, GNAO1, ABAT, PLXDC1, MPP2, SLC9A3R1, MYH10, CDH2, EPB41L3, GIPC1, ATCAY, APOE, MYH14, LRRC4B, CACNG7, FSTL3, PALM, PALMD, SORT1, AMIGO1, NGF, DNM3, NMNAT2, ARPC5, ADORA1, KISS1, K…	downregulated
GO:0006836	neurotransmitter transport	GO:BP	0.000420591	276	62	ENSG00000011347, ENSG00000110076, ENSG00000174669, ENSG00000089250, ENSG00000111450, ENSG00000188906, ENSG00000111371, ENSG00000111052, ENSG00000139220, ENSG00000102468, ENSG00000080644, ENSG00000140563, ENSG00000127561, ENSG00000167371, ENSG00000099365, ENSG00000183044, ENSG00000170425, ENSG00000131095, ENSG00000129353, ENSG00000123159, ENSG00000104863, ENSG00000063127, ENSG00000197106, ENSG0000…	SYT7, NRXN2, SLC29A2, NOS1, STX2, LRRK2, SLC38A1, LIN7A, PPFIA2, HTR2A, CHRNA3, MCTP2, SYNGR3, PRRT2, STX1B, ABAT, ADORA2B, GFAP, SLC44A2, GIPC1, LIN7B, SLC6A16, SLC6A17, CHRNB2, FCER1G, RGS4, GLUL, RGS2, SYT2, KMO, ADA, GAD1, PER2, NRXN1, VAMP8, SYN2, SNX4, P2RY1, CSPG5, ERC2, NAAA, SNCAIP, CSF2, SLC1A3, EDN1, STX11, RIMS1, GPER1, CADPS2, DGKI, STX1A, PCLO, ICA1, PPP1R9A, RIMS2, LYN, CACNA1B, AP…	any
GO:0006468	protein phosphorylation	GO:BP	0.00043181	2027	306	ENSG00000138166, ENSG00000151892, ENSG00000198873, ENSG00000066468, ENSG00000151651, ENSG00000165757, ENSG00000107968, ENSG00000099250, ENSG00000177283, ENSG00000165731, ENSG00000107984, ENSG00000109846, ENSG00000150782, ENSG00000137642, ENSG00000154127, ENSG00000184545, ENSG00000176697, ENSG00000129757, ENSG00000007372, ENSG00000026508, ENSG00000135362, ENSG00000134569, ENSG00000121236, ENSG0000…	DUSP5, GFRA1, GRK5, FGFR2, ADAM8, KIAA1462, MAP3K8, NRP1, FZD8, RET, DKK1, CRYAB, IL18, SORL1, UBASH3B, DUSP8, BDNF, CDKN1C, PAX6, CD44, PRR5L, LRP4, TRIM6, PPP2R5B, LRP5, NUAK1, CRY1, STYK1, SH2B3, NOS1, HSPB8, DUSP16, GPRC5A, PTPRO, LRRK2, CNTN1, RAPGEF3, C1QL4, ACVRL1, ERBB3, NAB2, HMGA2, PTPRR, DUSP6, GAS6, LATS2, FGF9, TNFRSF19, FLT1, DCLK1, RGCC, HTR2A, EDNRB, MOK, NDRG2, AJUBA, RIPK3, MBIP…	any
GO:0045937	positive regulation of phosphate metabolic process	GO:BP	0.00044104	1177	193	ENSG00000138166, ENSG00000066468, ENSG00000151651, ENSG00000165757, ENSG00000107968, ENSG00000099250, ENSG00000177283, ENSG00000165731, ENSG00000107984, ENSG00000150782, ENSG00000176697, ENSG00000026508, ENSG00000135362, ENSG00000134569, ENSG00000121236, ENSG00000089250, ENSG00000013588, ENSG00000188906, ENSG00000018236, ENSG00000079337, ENSG00000139567, ENSG00000065361, ENSG00000166886, ENSG0000…	DUSP5, FGFR2, ADAM8, KIAA1462, MAP3K8, NRP1, FZD8, RET, DKK1, IL18, BDNF, CD44, PRR5L, LRP4, TRIM6, NOS1, GPRC5A, LRRK2, CNTN1, RAPGEF3, ACVRL1, ERBB3, NAB2, HMGA2, DUSP6, GAS6, FGF9, TNFRSF19, FLT1, RGCC, HTR2A, EDNRB, AJUBA, RIPK3, BMP4, RPS6KA5, THBS1, FGF7, TNFAIP8L3, SMAD3, NPTN, CHRNA3, IGF1R, GPRC5B, NUPR1, LAT, PYCARD, DOK4, ADORA2B, LGALS9, CCL2, CDC6, TOM1L1, MMD, ACE, AXIN2, FAM20A, SO…	any
GO:0010562	positive regulation of phosphorus metabolic process	GO:BP	0.00044104	1177	193	ENSG00000138166, ENSG00000066468, ENSG00000151651, ENSG00000165757, ENSG00000107968, ENSG00000099250, ENSG00000177283, ENSG00000165731, ENSG00000107984, ENSG00000150782, ENSG00000176697, ENSG00000026508, ENSG00000135362, ENSG00000134569, ENSG00000121236, ENSG00000089250, ENSG00000013588, ENSG00000188906, ENSG00000018236, ENSG00000079337, ENSG00000139567, ENSG00000065361, ENSG00000166886, ENSG0000…	DUSP5, FGFR2, ADAM8, KIAA1462, MAP3K8, NRP1, FZD8, RET, DKK1, IL18, BDNF, CD44, PRR5L, LRP4, TRIM6, NOS1, GPRC5A, LRRK2, CNTN1, RAPGEF3, ACVRL1, ERBB3, NAB2, HMGA2, DUSP6, GAS6, FGF9, TNFRSF19, FLT1, RGCC, HTR2A, EDNRB, AJUBA, RIPK3, BMP4, RPS6KA5, THBS1, FGF7, TNFAIP8L3, SMAD3, NPTN, CHRNA3, IGF1R, GPRC5B, NUPR1, LAT, PYCARD, DOK4, ADORA2B, LGALS9, CCL2, CDC6, TOM1L1, MMD, ACE, AXIN2, FAM20A, SO…	any
GO:0008285	negative regulation of cell population proliferation	GO:BP	0.000446127	775	137	ENSG00000066468, ENSG00000107738, ENSG00000064201, ENSG00000176697, ENSG00000129757, ENSG00000185885, ENSG00000007372, ENSG00000175274, ENSG00000133321, ENSG00000175592, ENSG00000111252, ENSG00000186897, ENSG00000139567, ENSG00000167779, ENSG00000177425, ENSG00000133639, ENSG00000041515, ENSG00000132932, ENSG00000102755, ENSG00000102760, ENSG00000165795, ENSG00000100867, ENSG00000125378, ENSG0000…	FGFR2, C10orf54, TSPAN32, BDNF, CDKN1C, IFITM1, PAX6, TP53I11, RARRES3, FOSL1, SH2B3, C1QL4, ACVRL1, IGFBP6, PAWR, BTG1, MYO16, ATP8A2, FLT1, RGCC, NDRG2, DHRS2, BMP4, CLMN, THBS1, SPINT1, TPM1, SMAD3, NR2F2, SSTR5, NUPR1, TFAP4, GPR56, MARVELD3, PMP22, SERPINF1, LGALS9, CCL2, TAX1BP3, CDC6, AXIN2, SOX9, SLC9A3R1, PTPRM, TWSG1, CNN1, TGFB1, CEACAM1, APOE, CD33, NGF, PDPN, KIFAP3, PTGS2, ADORA1, K…	any
[truncated: 460 more rows]

## Sheet: Im-GCT-3504
Table S3. Pathway enrichment analysis of significantly expressed genes in G34W lines compared to edited lines derived from Im-GCT-4072, Im-GCT-3504, and Im-GCT-6176. Pathway enrichment analysis was performed separately for all significantly expressed genes, upregulated genes, downregulated genes, upregulated genes with consistent epigenetic changes (gain of H3K36me3 and loss of H3K27me3) and down…
[truncated: 422 more rows]

## Sheet: Im-GCT-6176
Table S3. Pathway enrichment analysis of significantly expressed genes in G34W lines compared to edited lines derived from Im-GCT-4072, Im-GCT-3504, and Im-GCT-6176. Pathway enrichment analysis was performed separately for all significantly expressed genes, upregulated genes, downregulated genes, upregulated genes with consistent epigenetic changes (gain of H3K36me3 and loss of H3K27me3) and down…
[truncated: 318 more rows]

[truncated: 3 more sheets: Im-GCT-4072 & -6176, Im-GCT-4072, -3504 and -6176, GCT Cells (Lim et al. 2017)]
