# Supplementary material for: H3.3 G34W Promotes Growth and Impedes Differentiation of Osteoblast-Like Mesenchymal Progenitors in Giant Cell Tumor of Bone
Source: Oxford University Press journal article supplement (doi:10.1158/2159-8290.cd-20-0461), 2020-09-23
Supplement: 21598290cd200461-sup-241016_2_supp_6571117_qgmhq8.xlsx [file 21598290cd200461-sup-241016_2_supp_6571117_qgmhq8.xlsx]

## Sheet: Sheet 1
		Table S5. Peptide intensities and differential enrichment analysis of the secretome between G34W and edited lines in Im-GCT-4072. The abundances of proteins enriched in the Golgi Apparatus of isogenic lines were quantified as intensities using histone mass spectrometry. Differential enrichment analysis of proteins was performed using a two-tailed t-test on the log2(1+x)-normalized intensities of …
Proteomics Intensities		Gene/Protein Annotations					Proteomics Intensities (MS)								Proteomics Coverage (MS)		Differential Proteomics (MS)			Differential Expression (RNA-seq)				RNA-MS Integration
Protein Group	Protein ID	Uniprot ID	HGNC	ENSEMBL	Description	GO:CC	Edited Rep 1	Edited Rep 2	Edited Rep 3	Edited Rep 4	G34W Rep 1	G34W Rep 2	G34W Rep 3	G34W Rep 4	#Peptides	#Unique	LFC	P	significant	baseMean	LFC	P	significant	significance	geometric average of LFC
1	3	Q09666	AHNAK	ENSG00000124942:AHNAK	Neuroblast differentiation-associated protein AHNAK OS=Homo sapiens OX=9606 GN=AHNAK PE=1 SV=2	T-tubule [GO:0030315]; actin cytoskeleton [GO:0015629]; cell-cell contact zone [GO:0044291]; costamere [GO:0043034]; cytoplasm [GO:0005737]; cytosol [GO:0005829]; extracellular exosome [GO:0070062]; focal adhesion [GO:0005925]; lysosomal membrane [GO:0005765]; membrane [GO:0016020]; nucleus [GO:0005634]; plasma membrane [GO:0005886]; sarcolemma [GO:0042383]; vesicle [GO:0031982]	79300000	67000000	73900000	71400000	62000000	69900000	55400000	55200000	912	906	-0.266006	0.0911024	FALSE	357533	1.08301	0.000340686	TRUE	significant by RNA only	0.536737
6	2	P35579	MYH9	ENSG00000100345:MYH9	Myosin-9 OS=Homo sapiens OX=9606 GN=MYH9 PE=1 SV=4	actin cytoskeleton [GO:0015629]; actomyosin [GO:0042641]; actomyosin contractile ring [GO:0005826]; brush border [GO:0005903]; cell leading edge [GO:0031252]; cell-cell adherens junction [GO:0005913]; cleavage furrow [GO:0032154]; cytoplasm [GO:0005737]; cytosol [GO:0005829]; extracellular exosome [GO:0070062]; focal adhesion [GO:0005925]; immunological synapse [GO:0001772]; membrane [GO:0016020]…	11400000	10700000	14900000	13900000	12500000	11900000	11100000	9580000	308	244	-0.175178	0.387547	FALSE	181056	-0.128581	0.792974	FALSE	non significant	0.150082
36	7	Q14789	GOLGB1	ENSG00000173230:GOLGB1	Golgin subfamily B member 1 OS=Homo sapiens OX=9606 GN=GOLGB1 PE=1 SV=2	Golgi apparatus [GO:0005794]; Golgi membrane [GO:0000139]; Golgi stack [GO:0005795]; cis-Golgi network [GO:0005801]; endoplasmic reticulum-Golgi intermediate compartment [GO:0005793]; integral component of membrane [GO:0016021]; membrane [GO:0016020]	1400000	1440000	1280000	1360000	3180000	2890000	1860000	1780000	144	143	0.825295	0.0879159	FALSE	15876.2	0.250018	0.408901	FALSE	non significant	0.454245
2	14	P07355	ANXA2	ENSG00000182718:ANXA2	Annexin A2 OS=Homo sapiens OX=9606 GN=ANXA2 PE=1 SV=2	PCSK9-AnxA2 complex [GO:1990667]; Schmidt-Lanterman incisure [GO:0043220]; azurophil granule lumen [GO:0035578]; basement membrane [GO:0005604]; basolateral plasma membrane [GO:0016323]; cell cortex [GO:0005938]; cell surface [GO:0009986]; cell-cell adherens junction [GO:0005913]; collagen-containing extracellular matrix [GO:0062023]; cytoplasm [GO:0005737]; cytosol [GO:0005829]; early endosome […	6820000	9610000	9060000	10800000	2390000	2350000	5660000	6360000	199	38	-1.11455	0.100751	FALSE	216419	-0.387509	0.164775	FALSE	non significant	0.657189
25	12	P46939	UTRN	ENSG00000152818:UTRN	Utrophin OS=Homo sapiens OX=9606 GN=UTRN PE=1 SV=2	cell junction [GO:0030054]; cortical actin cytoskeleton [GO:0030864]; cytoplasm [GO:0005737]; cytoskeleton [GO:0005856]; dystrophin-associated glycoprotein complex [GO:0016010]; extracellular exosome [GO:0070062]; filopodium [GO:0030175]; filopodium membrane [GO:0031527]; growth cone [GO:0030426]; membrane [GO:0016020]; neuromuscular junction [GO:0031594]; nucleoplasm [GO:0005654]; plasma membran…	2560000	2490000	2130000	2210000	1540000	1650000	1430000	1500000	146	137	-0.617594	0.00930459	FALSE	26482.5	-0.0385193	0.919649	FALSE	non significant	0.154238
13	6	P02452	COL1A1	ENSG00000108821:COL1A1	Collagen alpha-1(I) chain OS=Homo sapiens OX=9606 GN=COL1A1 PE=1 SV=5	Golgi apparatus [GO:0005794]; collagen type I trimer [GO:0005584]; collagen-containing extracellular matrix [GO:0062023]; cytoplasm [GO:0005737]; endoplasmic reticulum lumen [GO:0005788]; extracellular matrix [GO:0031012]; extracellular region [GO:0005576]; extracellular space [GO:0005615]; secretory granule [GO:0030141]	4630000	5170000	4300000	4130000	7940000	6120000	6100000	6070000	119	108	0.524903	0.0309888	FALSE	463117	0.269556	0.866982	FALSE	non significant	0.376153
21	24	Q9Y490	TLN1	ENSG00000137076:TLN1	Talin-1 OS=Homo sapiens OX=9606 GN=TLN1 PE=1 SV=3	cell surface [GO:0009986]; cytoskeleton [GO:0005856]; cytosol [GO:0005829]; extracellular exosome [GO:0070062]; extracellular region [GO:0005576]; focal adhesion [GO:0005925]; ruffle [GO:0001726]; ruffle membrane [GO:0032587]	2590000	2750000	2760000	3020000	1840000	1950000	1920000	2020000	134	115	-0.524616	0.00616373	FALSE	64221.3	-0.154348	0.650846	FALSE	non significant	0.284559
22	8	Q01082	SPTBN1	ENSG00000115306:SPTBN1	Spectrin beta chain non-erythrocytic 1 OS=Homo sapiens OX=9606 GN=SPTBN1 PE=1 SV=2	M band [GO:0031430]; axolemma [GO:0030673]; cuticular plate [GO:0032437]; cytoplasm [GO:0005737]; cytosol [GO:0005829]; extracellular exosome [GO:0070062]; glutamatergic synapse [GO:0098978]; nucleolus [GO:0005730]; postsynaptic density [GO:0014069]; protein-containing complex [GO:0032991]; spectrin [GO:0008091]; spectrin-associated cytoskeleton [GO:0014731]	3620000	3690000	3110000	3780000	2010000	2010000	1650000	1730000	105	95	-0.940294	0.00422987	FALSE	58844.9	-0.351375	0.400118	FALSE	non significant	0.574801
9	15	P04406	GAPDH	ENSG00000111640:GAPDH	Glyceraldehyde-3-phosphate dehydrogenase OS=Homo sapiens OX=9606 GN=GAPDH PE=1 SV=3	GAIT complex [GO:0097452]; cytoplasm [GO:0005737]; cytosol [GO:0005829]; extracellular exosome [GO:0070062]; intracellular membrane-bounded organelle [GO:0043231]; lipid droplet [GO:0005811]; membrane [GO:0016020]; microtubule cytoskeleton [GO:0015630]; nuclear membrane [GO:0031965]; nucleus [GO:0005634]; perinuclear region of cytoplasm [GO:0048471]; plasma membrane [GO:0005886]; ribonucleoprotei…	10700000	13500000	14800000	14800000	5880000	6410000	28200000	38400000	103	103	0.552236	0.935741	FALSE	214033	0.189895	0.682158	FALSE	non significant	0.323832
26	20	P21333	FLNA	ENSG00000196924:FLNA	Filamin-A OS=Homo sapiens OX=9606 GN=FLNA PE=1 SV=4	Myb complex [GO:0031523]; Z disc [GO:0030018]; actin cytoskeleton [GO:0015629]; actin filament [GO:0005884]; apical dendrite [GO:0097440]; cell-cell junction [GO:0005911]; cortical cytoskeleton [GO:0030863]; cytoplasm [GO:0005737]; cytosol [GO:0005829]; dendritic shaft [GO:0043198]; extracellular exosome [GO:0070062]; extracellular region [GO:0005576]; focal adhesion [GO:0005925]; glutamatergic s…	1690000	1730000	2220000	2330000	1480000	1550000	1320000	1400000	102	86	-0.471018	0.0694925	FALSE	378304	-0.20074	0.588631	FALSE	non significant	0.307493
46	1	Q13813	SPTAN1	ENSG00000197694:SPTAN1	Spectrin alpha chain non-erythrocytic 1 OS=Homo sapiens OX=9606 GN=SPTAN1 PE=1 SV=3	cytosol [GO:0005829]; extracellular exosome [GO:0070062]; extracellular region [GO:0005576]; extracellular vesicle [GO:1903561]; intracellular membrane-bounded organelle [GO:0043231]; membrane [GO:0016020]; microtubule cytoskeleton [GO:0015630]; specific granule lumen [GO:0035580]; spectrin [GO:0008091]; tertiary granule lumen [GO:1904724]	2430000	2580000	2390000	2850000	1350000	1450000	1230000	1310000	93	93	-0.940712	0.00229584	FALSE	41395.3	-0.7853	0.0354738	FALSE	non significant	0.859501
31	18	P35580	MYH10	ENSG00000133026:MYH10	Myosin-10 OS=Homo sapiens OX=9606 GN=MYH10 PE=1 SV=3	actomyosin [GO:0042641]; brush border [GO:0005903]; cell cortex [GO:0005938]; cleavage furrow [GO:0032154]; cytoplasm [GO:0005737]; cytosol [GO:0005829]; dendritic spine [GO:0043197]; extracellular exosome [GO:0070062]; glutamatergic synapse [GO:0098978]; growth cone [GO:0030426]; lamellipodium [GO:0030027]; midbody [GO:0030496]; myosin II complex [GO:0016460]; myosin II filament [GO:0097513]; my…	1340000	1320000	1580000	1510000	837000	831000	680000	641000	132	84	-0.943899	0.00930459	FALSE	13456	-1.92099	0.000680028	TRUE	significant by RNA only	1.34656
45	5	Q9NZM1	MYOF	ENSG00000138119:MYOF	Myoferlin OS=Homo sapiens OX=9606 GN=MYOF PE=1 SV=1	caveola [GO:0005901]; cytoplasmic vesicle [GO:0031410]; cytoplasmic vesicle membrane [GO:0030659]; extracellular exosome [GO:0070062]; integral component of membrane [GO:0016021]; intracellular membrane-bounded organelle [GO:0043231]; nuclear envelope [GO:0005635]; nuclear membrane [GO:0031965]; plasma membrane [GO:0005886]	1290000	1430000	1350000	1270000	1120000	1300000	1520000	1520000	80	78	0.0320612	0.899571	FALSE	35832.2	0.510778	0.0212551	FALSE	non significant	0.127969
15	16	P08670	VIM	ENSG00000026025:VIM	Vimentin OS=Homo sapiens OX=9606 GN=VIM PE=1 SV=4	cell leading edge [GO:0031252]; cytoplasm [GO:0005737]; cytoskeleton [GO:0005856]; cytosol [GO:0005829]; extracellular exosome [GO:0070062]; focal adhesion [GO:0005925]; intermediate filament [GO:0005882]; neuron projection [GO:0043005]; nuclear matrix [GO:0016363]; peroxisome [GO:0005777]; phagocytic vesicle [GO:0045335]; plasma membrane [GO:0005886]; polysome [GO:0005844]; ribonucleoprotein com…	4330000	3970000	4630000	5230000	5860000	5520000	5380000	5460000	108	93	0.291095	0.0848412	FALSE	287494	-0.0932941	0.731262	FALSE	non significant	0.164795
10	17	P04083	ANXA1	ENSG00000135046:ANXA1	Annexin A1 OS=Homo sapiens OX=9606 GN=ANXA1 PE=1 SV=2	apical plasma membrane [GO:0016324]; basolateral plasma membrane [GO:0016323]; cell surface [GO:0009986]; cell-cell adherens junction [GO:0005913]; collagen-containing extracellular matrix [GO:0062023]; cornified envelope [GO:0001533]; cytoplasm [GO:0005737]; cytoplasmic vesicle membrane [GO:0030659]; cytosol [GO:0005829]; early endosome membrane [GO:0031901]; endosome [GO:0005768]; extracellular…	27300000	22000000	7290000	8250000	5910000	7070000	9410000	6540000	103	101	-1.16432	0.236314	FALSE	49058.1	-0.903918	1.15831e-05	FALSE	non significant	1.02589
54	31	Q15149	PLEC	ENSG00000178209:PLEC	Plectin OS=Homo sapiens OX=9606 GN=PLEC PE=1 SV=3	brush border [GO:0005903]; costamere [GO:0043034]; cytoplasm [GO:0005737]; cytosol [GO:0005829]; extracellular exosome [GO:0070062]; focal adhesion [GO:0005925]; hemidesmosome [GO:0030056]; intermediate filament cytoskeleton [GO:0045111]; membrane [GO:0016020]; perinuclear region of cytoplasm [GO:0048471]; plasma membrane [GO:0005886]; sarcolemma [GO:0042383]; sarcoplasm [GO:0016528]	1050000	1130000	1110000	1210000	1450000	1190000	1150000	1100000	114	106	0.119909	0.413341	FALSE	132335	0.496255	0.152629	FALSE	non significant	0.243938
17	43	P26038	MSN	ENSG00000147065:MSN	Moesin OS=Homo sapiens OX=9606 GN=MSN PE=1 SV=3	apical part of cell [GO:0045177]; apical plasma membrane [GO:0016324]; basolateral plasma membrane [GO:0016323]; blood microparticle [GO:0072562]; cell periphery [GO:0071944]; cell surface [GO:0009986]; cytoplasm [GO:0005737]; cytoskeleton [GO:0005856]; cytosol [GO:0005829]; extracellular exosome [GO:0070062]; extracellular space [GO:0005615]; filopodium [GO:0030175]; focal adhesion [GO:0005925];…	4100000	3910000	3700000	3690000	3780000	3950000	3920000	4430000	102	77	0.0623371	0.469517	FALSE	45796.3	-0.111339	0.711971	FALSE	non significant	0.0833099
28	40	O00159	MYO1C	ENSG00000197879:MYO1C	Unconventional myosin-Ic OS=Homo sapiens OX=9606 GN=MYO1C PE=1 SV=4	basal plasma membrane [GO:0009925]; brush border [GO:0005903]; cytoplasm [GO:0005737]; cytoplasmic vesicle membrane [GO:0030659]; cytosol [GO:0005829]; extracellular exosome [GO:0070062]; filamentous actin [GO:0031941]; lateral plasma membrane [GO:0016328]; membrane [GO:0016020]; membrane raft [GO:0045121]; microvillus [GO:0005902]; nuclear body [GO:0016604]; nuclear pore [GO:0005643]; nucleolus …	3740000	3910000	3320000	3350000	2020000	2220000	2080000	2440000	107	99	-0.709029	0.00515817	FALSE	29939.9	-0.265775	0.161354	FALSE	non significant	0.434099
7	22	P68032	ACTC1	ENSG00000159251:ACTC1	Actin alpha cardiac muscle 1 OS=Homo sapiens OX=9606 GN=ACTC1 PE=1 SV=1	I band [GO:0031674]; actin filament [GO:0005884]; actomyosin, actin portion [GO:0042643]; blood microparticle [GO:0072562]; cell body [GO:0044297]; cytoplasm [GO:0005737]; cytosol [GO:0005829]; extracellular exosome [GO:0070062]; extracellular space [GO:0005615]; filopodium [GO:0030175]; focal adhesion [GO:0005925]; glutamatergic synapse [GO:0098978]; lamellipodium [GO:0030027]; membrane [GO:0016…	31600	31900	32800	32400	30100	38600	33000	30500	109	4	0.0387101	0.802186	FALSE	347.726	-5.82564	3.66832e-11	TRUE	significant by RNA only	0.47488
42	29	P08123	COL1A2	ENSG00000164692:COL1A2	Collagen alpha-2(I) chain OS=Homo sapiens OX=9606 GN=COL1A2 PE=1 SV=7	collagen type I trimer [GO:0005584]; collagen-containing extracellular matrix [GO:0062023]; endoplasmic reticulum [GO:0005783]; endoplasmic reticulum lumen [GO:0005788]; extracellular exosome [GO:0070062]; extracellular matrix [GO:0031012]; extracellular region [GO:0005576]; extracellular space [GO:0005615]	1870000	2060000	1680000	1660000	3490000	2840000	2950000	3000000	73	68	0.756283	0.00691658	FALSE	871187	0.224652	0.78759	FALSE	non significant	0.41219
33	41	P14625	HSP90B1	ENSG00000166598:HSP90B1	Endoplasmin OS=Homo sapiens OX=9606 GN=HSP90B1 PE=1 SV=1	collagen-containing extracellular matrix [GO:0062023]; cytosol [GO:0005829]; endocytic vesicle lumen [GO:0071682]; endoplasmic reticulum [GO:0005783]; endoplasmic reticulum chaperone complex [GO:0034663]; endoplasmic reticulum lumen [GO:0005788]; endoplasmic reticulum membrane [GO:0005789]; extracellular exosome [GO:0070062]; extracellular region [GO:0005576]; focal adhesion [GO:0005925]; melanos…	2070000	2150000	2890000	2220000	5130000	4640000	3640000	2840000	88	82	0.800491	0.0591004	FALSE	94618.2	0.147675	0.557918	FALSE	non significant	0.34382
18	28	P11021	HSPA5	ENSG00000044574:HSPA5	Endoplasmic reticulum chaperone BiP OS=Homo sapiens OX=9606 GN=HSPA5 PE=1 SV=2	cell surface [GO:0009986]; cytoplasm [GO:0005737]; cytosol [GO:0005829]; endoplasmic reticulum [GO:0005783]; endoplasmic reticulum chaperone complex [GO:0034663]; endoplasmic reticulum lumen [GO:0005788]; endoplasmic reticulum membrane [GO:0005789]; endoplasmic reticulum-Golgi intermediate compartment [GO:0005793]; extracellular exosome [GO:0070062]; focal adhesion [GO:0005925]; integral componen…	3580000	3680000	4630000	3710000	4000000	4100000	5100000	4140000	91	84	0.152558	0.346493	FALSE	26884.9	-0.376314	0.359437	FALSE	non significant	0.239603
50	23	Q02818	NUCB1	ENSG00000104805:NUCB1	Nucleobindin-1 OS=Homo sapiens OX=9606 GN=NUCB1 PE=1 SV=4	Golgi cisterna membrane [GO:0032580]; Golgi-associated vesicle [GO:0005798]; cis-Golgi network [GO:0005801]; early endosome [GO:0005769]; endoplasmic reticulum lumen [GO:0005788]; endoplasmic reticulum-Golgi intermediate compartment [GO:0005793]; extracellular exosome [GO:0070062]; extracellular space [GO:0005615]; extrinsic component of Golgi membrane [GO:0090498]; lumenal side of Golgi membrane…	1130000	1160000	942000	920000	4670000	3900000	2020000	1970000	64	63	1.59696	0.0543255	FALSE	17859.7	0.49912	0.0409581	FALSE	non significant	0.89279
8	21	P68133	ACTA1	ENSG00000143632:ACTA1	Actin alpha skeletal muscle OS=Homo sapiens OX=9606 GN=ACTA1 PE=1 SV=1	actin cytoskeleton [GO:0015629]; actin filament [GO:0005884]; blood microparticle [GO:0072562]; cell body [GO:0044297]; cytosol [GO:0005829]; extracellular exosome [GO:0070062]; extracellular space [GO:0005615]; filopodium [GO:0030175]; lamellipodium [GO:0030027]; sarcomere [GO:0030017]; stress fiber [GO:0001725]; striated muscle thin filament [GO:0005865]	32300	40500	32500	34100	30500	25800	24200	25000	107	6	-0.401988	0.0398954	FALSE	145.392	-0.727203	0.385411	FALSE	non significant	0.540672
16	34	P30101	PDIA3	ENSG00000167004:PDIA3	Protein disulfide-isomerase A3 OS=Homo sapiens OX=9606 GN=PDIA3 PE=1 SV=4	MHC class I peptide loading complex [GO:0042824]; cell surface [GO:0009986]; endoplasmic reticulum [GO:0005783]; endoplasmic reticulum lumen [GO:0005788]; extracellular exosome [GO:0070062]; extracellular space [GO:0005615]; focal adhesion [GO:0005925]; melanosome [GO:0042470]; nucleus [GO:0005634]; phagocytic vesicle [GO:0045335]; recycling endosome membrane [GO:0055038]	4020000	4010000	4350000	3730000	6550000	6340000	5460000	4570000	97	96	0.508651	0.0598474	FALSE	42409	-0.0531212	0.899306	FALSE	non significant	0.164378
55	30	Q00610	CLTC	ENSG00000141367:CLTC	Clathrin heavy chain 1 OS=Homo sapiens OX=9606 GN=CLTC PE=1 SV=5	clathrin coat [GO:0030118]; clathrin coat of coated pit [GO:0030132]; clathrin coat of trans-Golgi network vesicle [GO:0030130]; clathrin complex [GO:0071439]; clathrin-coated endocytic vesicle [GO:0045334]; clathrin-coated endocytic vesicle membrane [GO:0030669]; clathrin-coated vesicle [GO:0030136]; cytosol [GO:0005829]; endolysosome membrane [GO:0036020]; endosome [GO:0005768]; extracellular e…	1560000	1720000	1740000	2070000	1120000	1210000	1220000	1350000	82	82	-0.533004	0.0221882	FALSE	69829.8	0.113697	0.690286	FALSE	non significant	0.246173
53	11	O60716	CTNND1	ENSG00000198561:CTNND1	Catenin delta-1 OS=Homo sapiens OX=9606 GN=CTNND1 PE=1 SV=1	Schaffer collateral - CA1 synapse [GO:0098685]; catenin complex [GO:0016342]; cell-cell adherens junction [GO:0005913]; cell-cell junction [GO:0005911]; cytoplasm [GO:0005737]; cytosol [GO:0005829]; dendritic spine [GO:0043197]; extracellular exosome [GO:0070062]; glutamatergic synapse [GO:0098978]; growth cone [GO:0030426]; hippocampal mossy fiber to CA3 synapse [GO:0098686]; lamellipodium [GO:0…	1850000	1820000	1400000	1510000	1220000	1100000	999000	1030000	63	63	-0.597404	0.0254679	FALSE	17251.5	-0.34711	0.046087	FALSE	non significant	0.455373
68	53	Q10471	GALNT2	ENSG00000143641:GALNT2	Polypeptide N-acetylgalactosaminyltransferase 2 OS=Homo sapiens OX=9606 GN=GALNT2 PE=1 SV=1	Golgi apparatus [GO:0005794]; Golgi cisterna membrane [GO:0032580]; Golgi membrane [GO:0000139]; Golgi stack [GO:0005795]; endoplasmic reticulum membrane [GO:0005789]; extracellular region [GO:0005576]; integral component of Golgi membrane [GO:0030173]; membrane [GO:0016020]; perinuclear region of cytoplasm [GO:0048471]	1070000	1120000	991000	933000	2150000	2450000	1510000	1580000	55	53	0.902442	0.0411507	FALSE	21080	-1.01542	0.000120916	TRUE	significant by RNA only	0.957264
41	76	P05023	ATP1A1	ENSG00000163399:ATP1A1	Sodium/potassium-transporting ATPase subunit alpha-1 OS=Homo sapiens OX=9606 GN=ATP1A1 PE=1 SV=1	Golgi apparatus [GO:0005794]; T-tubule [GO:0030315]; apical plasma membrane [GO:0016324]; basolateral plasma membrane [GO:0016323]; caveola [GO:0005901]; endoplasmic reticulum [GO:0005783]; endosome [GO:0005768]; extracellular exosome [GO:0070062]; extracellular vesicle [GO:1903561]; integral component of membrane [GO:0016021]; intercalated disc [GO:0014704]; melanosome [GO:0042470]; membrane [GO…	1920000	2130000	1600000	1460000	1260000	1310000	1180000	1370000	71	48	-0.473706	0.0756052	FALSE	28538.8	0.00481022	0.992458	FALSE	non significant	0.047735
87	4	Q14697	GANAB	ENSG00000089597:GANAB	Neutral alpha-glucosidase AB OS=Homo sapiens OX=9606 GN=GANAB PE=1 SV=3	Golgi apparatus [GO:0005794]; endoplasmic reticulum lumen [GO:0005788]; extracellular exosome [GO:0070062]; glucosidase II complex [GO:0017177]; intracellular membrane-bounded organelle [GO:0043231]; melanosome [GO:0042470]; membrane [GO:0016020]	806000	922000	849000	764000	656000	651000	1270000	1220000	57	57	0.18458	0.783441	FALSE	35076.6	0.364799	0.120373	FALSE	non significant	0.259489
2366	2376	Q15063	POSTN	ENSG00000133110:POSTN	Periostin OS=Homo sapiens OX=9606 GN=POSTN PE=1 SV=2	collagen-containing extracellular matrix [GO:0062023]; extracellular matrix [GO:0031012]; extracellular space [GO:0005615]; neuromuscular junction [GO:0031594]; trans-Golgi network [GO:0005802]	1550	1410	857.079	1140	4410	5010	3280	3960	1	1	1.74883	0.00961516	TRUE	38380	5.75315	8.83206e-07	TRUE	significantly consistently upregulated	3.17195
24	63	P68104	EEF1A1	ENSG00000156508:EEF1A1	Elongation factor 1-alpha 1 OS=Homo sapiens OX=9606 GN=EEF1A1 PE=1 SV=1	cortical actin cytoskeleton [GO:0030864]; cytoplasm [GO:0005737]; cytoplasmic side of lysosomal membrane [GO:0098574]; cytosol [GO:0005829]; eukaryotic translation elongation factor 1 complex [GO:0005853]; extracellular exosome [GO:0070062]; extracellular region [GO:0005576]; extracellular space [GO:0005615]; ficolin-1-rich granule lumen [GO:1904813]; membrane [GO:0016020]; nucleolus [GO:0005730]…	2030000	1810000	2220000	2030000	3940000	3500000	2850000	2410000	69	42	0.650617	0.0650528	FALSE	487946	0.192027	0.597414	FALSE	non significant	0.353463
1041	1441	P26447	S100A4	ENSG00000196154:S100A4	Protein S100-A4 OS=Homo sapiens OX=9606 GN=S100A4 PE=1 SV=1	collagen-containing extracellular matrix [GO:0062023]; extracellular exosome [GO:0070062]; extracellular region [GO:0005576]; extracellular space [GO:0005615]; neuron projection [GO:0043005]; nucleus [GO:0005634]; perinuclear region of cytoplasm [GO:0048471]	28400	30000	30400	29300	121000	132000	152000	157000	3	3	2.25056	0.00393637	TRUE	13734.1	4.15298	3.39444e-15	TRUE	significantly consistently upregulated	3.05721
37	72	P06576	ATP5B	ENSG00000110955:ATP5B	ATP synthase subunit beta mitochondrial OS=Homo sapiens OX=9606 GN=ATP5F1B PE=1 SV=3	cell surface [GO:0009986]; extracellular exosome [GO:0070062]; membrane [GO:0016020]; mitochondrial matrix [GO:0005759]; mitochondrial membrane [GO:0031966]; mitochondrial nucleoid [GO:0042645]; mitochondrial proton-transporting ATP synthase complex [GO:0005753]; mitochondrial proton-transporting ATP synthase, catalytic core [GO:0005754]; mitochondrion [GO:0005739]; nucleus [GO:0005634]; plasma m…	2280000	2870000	3390000	3070000	2080000	2370000	3000000	3090000	65	65	-0.139493	0.564216	FALSE	32858.5	-0.531977	0.00988545	FALSE	non significant	0.27241
30	79	P05556	ITGB1	ENSG00000150093:ITGB1	Integrin beta-1 OS=Homo sapiens OX=9606 GN=ITGB1 PE=1 SV=2	Schaffer collateral - CA1 synapse [GO:0098685]; cell surface [GO:0009986]; cleavage furrow [GO:0032154]; cytoplasm [GO:0005737]; dendritic spine [GO:0043197]; external side of plasma membrane [GO:0009897]; extracellular exosome [GO:0070062]; filopodium [GO:0030175]; focal adhesion [GO:0005925]; glial cell projection [GO:0097386]; glutamatergic synapse [GO:0098978]; integral component of synaptic …	3360000	3670000	3380000	3240000	1840000	2050000	2200000	2450000	64	64	-0.676593	0.0170262	FALSE	138204	0.0486714	0.887255	FALSE	non significant	0.181468
39	55	O43491	EPB41L2	ENSG00000079819:EPB41L2	Band 4.1-like protein 2 OS=Homo sapiens OX=9606 GN=EPB41L2 PE=1 SV=1	cell cortex region [GO:0099738]; cell junction [GO:0030054]; cytosol [GO:0005829]; extracellular exosome [GO:0070062]; focal adhesion [GO:0005925]; nucleoplasm [GO:0005654]; nucleus [GO:0005634]; plasma membrane [GO:0005886]; spectrin [GO:0008091]	2960000	2770000	2210000	2360000	1580000	1730000	1320000	1460000	71	63	-0.75813	0.0145744	FALSE	10295.2	-1.84438	1.93587e-14	TRUE	significant by RNA only	1.18249
35	124	P10809	HSPD1	ENSG00000144381:HSPD1	60 kDa heat shock protein mitochondrial OS=Homo sapiens OX=9606 GN=HSPD1 PE=1 SV=2	cell surface [GO:0009986]; clathrin-coated pit [GO:0005905]; coated vesicle [GO:0030135]; cytoplasm [GO:0005737]; cytosol [GO:0005829]; early endosome [GO:0005769]; extracellular exosome [GO:0070062]; extracellular space [GO:0005615]; lipopolysaccharide receptor complex [GO:0046696]; membrane [GO:0016020]; mitochondrial inner membrane [GO:0005743]; mitochondrial matrix [GO:0005759]; mitochondrion…	2260000	2920000	5500000	4540000	4150000	2740000	5700000	4150000	79	79	0.137331	0.733	FALSE	26982.9	0.0944253	0.836995	FALSE	non significant	0.113875
89	50	Q86UP2	KTN1	ENSG00000126777:KTN1	Kinectin OS=Homo sapiens OX=9606 GN=KTN1 PE=1 SV=1	endoplasmic reticulum [GO:0005783]; endoplasmic reticulum lumen [GO:0005788]; endoplasmic reticulum membrane [GO:0005789]; integral component of membrane [GO:0016021]; integral component of plasma membrane [GO:0005887]; membrane [GO:0016020]	1520000	1470000	1920000	1710000	1490000	1420000	1470000	1220000	80	78	-0.241404	0.154106	FALSE	45077.1	-0.579798	0.000909389	FALSE	non significant	0.37412
32	57	P27824	CANX	ENSG00000127022:CANX	Calnexin OS=Homo sapiens OX=9606 GN=CANX PE=1 SV=2	axon [GO:0030424]; dendrite cytoplasm [GO:0032839]; dendritic spine [GO:0043197]; endoplasmic reticulum [GO:0005783]; endoplasmic reticulum lumen [GO:0005788]; endoplasmic reticulum membrane [GO:0005789]; endoplasmic reticulum quality control compartment [GO:0044322]; extracellular exosome [GO:0070062]; glutamatergic synapse [GO:0098978]; integral component of lumenal side of endoplasmic reticulu…	3750000	4160000	3450000	3180000	4590000	4740000	3950000	3750000	62	61	0.228051	0.182301	FALSE	83144.7	-0.0710671	0.865692	FALSE	non significant	0.127306
23	107	P04075	ALDOA	ENSG00000149925:ALDOA	Fructose-bisphosphate aldolase A OS=Homo sapiens OX=9606 GN=ALDOA PE=1 SV=2	I band [GO:0031674]; M band [GO:0031430]; actin cytoskeleton [GO:0015629]; cytosol [GO:0005829]; extracellular exosome [GO:0070062]; extracellular region [GO:0005576]; extracellular space [GO:0005615]; ficolin-1-rich granule lumen [GO:1904813]; membrane [GO:0016020]; nucleus [GO:0005634]; platelet alpha granule lumen [GO:0031093]; secretory granule lumen [GO:0034774]; sperm head [GO:0061827]; ter…	4900000	4920000	3480000	3830000	1700000	1950000	8030000	11600000	65	59	0.442566	0.99141	FALSE	41928.1	0.0436659	0.920203	FALSE	non significant	0.139015
34	45	P04899	GNAI2	ENSG00000114353:GNAI2	Guanine nucleotide-binding protein G(i) subunit alpha-2 OS=Homo sapiens OX=9606 GN=GNAI2 PE=1 SV=3	cell body [GO:0044297]; centrosome [GO:0005813]; cytoplasm [GO:0005737]; cytosol [GO:0005829]; dendrite [GO:0030425]; extracellular exosome [GO:0070062]; extracellular vesicle [GO:1903561]; heterotrimeric G-protein complex [GO:0005834]; membrane [GO:0016020]; membrane raft [GO:0045121]; midbody [GO:0030496]; nucleoplasm [GO:0005654]; plasma membrane [GO:0005886]	981000	974000	794000	791000	842000	1000000	821000	926000	59	32	0.0198326	0.889946	FALSE	27524.3	-0.0313051	0.926346	FALSE	non significant	0.0249171
67	35	P14618	PKM	ENSG00000067225:PKM	Pyruvate kinase PKM OS=Homo sapiens OX=9606 GN=PKM PE=1 SV=4	cilium [GO:0005929]; collagen-containing extracellular matrix [GO:0062023]; cytoplasm [GO:0005737]; cytosol [GO:0005829]; extracellular exosome [GO:0070062]; extracellular region [GO:0005576]; extracellular vesicle [GO:1903561]; ficolin-1-rich granule lumen [GO:1904813]; mitochondrion [GO:0005739]; nucleus [GO:0005634]; pyruvate kinase complex [GO:1902912]; secretory granule lumen [GO:0034774]; v…	1290000	1250000	1260000	1470000	2080000	2170000	1890000	2110000	55	55	0.646591	0.00454459	FALSE	196851	0.472335	0.068773	FALSE	non significant	0.552637
1749	2549	Q06033	ITIH3	ENSG00000162267:ITIH3	Inter-alpha-trypsin inhibitor heavy chain H3 OS=Homo sapiens OX=9606 GN=ITIH3 PE=1 SV=2	extracellular exosome [GO:0070062]; extracellular region [GO:0005576]; platelet dense granule lumen [GO:0031089]	4570	4190	4480	4140	10200	12500	10600	12600	1	1	1.40107	0.00405097	TRUE	624.255	-6.18917	9.45273e-09	TRUE	inconsistently deregulated but significant in both	2.94473
101	25	O75369	FLNB	ENSG00000136068:FLNB	Filamin-B OS=Homo sapiens OX=9606 GN=FLNB PE=1 SV=2	Z disc [GO:0030018]; actin cytoskeleton [GO:0015629]; brush border [GO:0005903]; cell cortex [GO:0005938]; cytoplasm [GO:0005737]; cytosol [GO:0005829]; extracellular exosome [GO:0070062]; focal adhesion [GO:0005925]; integral component of membrane [GO:0016021]; neuron projection [GO:0043005]; neuronal cell body [GO:0043025]; nucleus [GO:0005634]; phagocytic vesicle [GO:0045335]; plasma membrane …	623000	666000	705000	762000	468000	462000	444000	488000	65	50	-0.565723	0.0131853	FALSE	62747.5	-0.256272	0.480364	FALSE	non significant	0.380761
112	75	Q9BSJ8	ESYT1	ENSG00000139641:ESYT1	Extended synaptotagmin-1 OS=Homo sapiens OX=9606 GN=ESYT1 PE=1 SV=1	endoplasmic reticulum [GO:0005783]; endoplasmic reticulum membrane [GO:0005789]; extrinsic component of cytoplasmic side of plasma membrane [GO:0031234]; integral component of endoplasmic reticulum membrane [GO:0030176]; intrinsic component of endoplasmic reticulum membrane [GO:0031227]; membrane [GO:0016020]	687000	775000	713000	732000	842000	949000	939000	882000	45	45	0.313267	0.0149291	FALSE	36909.8	0.469807	0.0372145	FALSE	non significant	0.383634
133	52	Q14160	SCRIB	ENSG00000180900:SCRIB	Protein scribble homolog OS=Homo sapiens OX=9606 GN=SCRIB PE=1 SV=4	Scrib-APC-beta-catenin complex [GO:0034750]; basolateral plasma membrane [GO:0016323]; cell junction [GO:0030054]; cell-cell adherens junction [GO:0005913]; cell-cell contact zone [GO:0044291]; cell-cell junction [GO:0005911]; extracellular exosome [GO:0070062]; extrinsic component of postsynaptic density membrane [GO:0099147]; glutamatergic synapse [GO:0098978]; lamellipodium [GO:0030027]; myeli…	626000	609000	486000	518000	537000	573000	472000	519000	48	42	-0.0917784	0.550225	FALSE	9187.93	0.296376	0.309786	FALSE	non significant	0.164927
2261	2155	P15328	FOLR1	ENSG00000110195:FOLR1	Folate receptor alpha OS=Homo sapiens OX=9606 GN=FOLR1 PE=1 SV=3	ER to Golgi transport vesicle membrane [GO:0012507]; Golgi membrane [GO:0000139]; anchored component of external side of plasma membrane [GO:0031362]; apical plasma membrane [GO:0016324]; basolateral plasma membrane [GO:0016323]; brush border membrane [GO:0031526]; cell surface [GO:0009986]; clathrin-coated vesicle [GO:0030136]; endoplasmic reticulum membrane [GO:0005789]; endoplasmic reticulum-G…	8070	7580	8630	7810	1730	852.904	663.149	862.64	1	1	-2.96537	0.016852	TRUE	154.613	-2.89425	2.23947e-07	TRUE	significantly consistently downregulated	2.92959
66	58	P50454	SERPINH1	ENSG00000149257:SERPINH1	Serpin H1 OS=Homo sapiens OX=9606 GN=SERPINH1 PE=1 SV=2	collagen-containing extracellular matrix [GO:0062023]; endoplasmic reticulum [GO:0005783]; endoplasmic reticulum lumen [GO:0005788]; endoplasmic reticulum-Golgi intermediate compartment [GO:0005793]; extracellular space [GO:0005615]; membrane raft [GO:0045121]	1480000	1840000	2580000	2100000	1720000	1500000	1940000	1750000	58	58	-0.211314	0.471241	FALSE	60879.2	-0.187586	0.731292	FALSE	non significant	0.199097
137	13	P33527	ABCC1	ENSG00000103222:ABCC1	Multidrug resistance-associated protein 1 OS=Homo sapiens OX=9606 GN=ABCC1 PE=1 SV=3	basolateral plasma membrane [GO:0016323]; extracellular exosome [GO:0070062]; integral component of plasma membrane [GO:0005887]; membrane [GO:0016020]; plasma membrane [GO:0005886]; vacuolar membrane [GO:0005774]	1080000	940000	768000	768000	465000	451000	432000	460000	43	41	-0.975861	0.0228726	FALSE	6416.17	-0.569799	0.0534234	FALSE	non significant	0.745684
107	37	P08133	ANXA6	ENSG00000197043:ANXA6	Annexin A6 OS=Homo sapiens OX=9606 GN=ANXA6 PE=1 SV=3	collagen-containing extracellular matrix [GO:0062023]; extracellular exosome [GO:0070062]; focal adhesion [GO:0005925]; late endosome membrane [GO:0031902]; lysosomal membrane [GO:0005765]; melanosome [GO:0042470]; membrane [GO:0016020]; mitochondrion [GO:0005739]; perinuclear region of cytoplasm [GO:0048471]	1610000	1840000	1570000	1850000	979000	1090000	1930000	1700000	57	54	-0.269601	0.377368	FALSE	28604	-0.749919	5.36377e-05	FALSE	non significant	0.449643
47	60	P25705	ATP5A1	ENSG00000152234:ATP5A1	ATP synthase subunit alpha mitochondrial OS=Homo sapiens OX=9606 GN=ATP5F1A PE=1 SV=1	extracellular exosome [GO:0070062]; membrane [GO:0016020]; mitochondrial inner membrane [GO:0005743]; mitochondrial matrix [GO:0005759]; mitochondrial proton-transporting ATP synthase complex [GO:0005753]; mitochondrial proton-transporting ATP synthase complex, catalytic core F(1) [GO:0000275]; mitochondrion [GO:0005739]; plasma membrane [GO:0005886]; proton-transporting ATP synthase complex [GO:…	2010000	2400000	2730000	2670000	2480000	2240000	2820000	2710000	66	65	0.0632989	0.698571	FALSE	34519.6	-0.317494	0.131432	FALSE	non significant	0.141764
48	78	P11142	HSPA8	ENSG00000109971:HSPA8	Heat shock cognate 71 kDa protein OS=Homo sapiens OX=9606 GN=HSPA8 PE=1 SV=1	Prp19 complex [GO:0000974]; autophagosome [GO:0005776]; axon [GO:0030424]; blood microparticle [GO:0072562]; chaperone complex [GO:0101031]; clathrin-sculpted gamma-aminobutyric acid transport vesicle membrane [GO:0061202]; cytoplasm [GO:0005737]; cytosol [GO:0005829]; dendrite [GO:0030425]; extracellular exosome [GO:0070062]; extracellular region [GO:0005576]; extracellular space [GO:0005615]; f…	1290000	1330000	1390000	1450000	1110000	1070000	1370000	1270000	63	36	-0.179868	0.195927	FALSE	142530	0.176564	0.521635	FALSE	non significant	0.178208
57	39	Q07065	CKAP4	ENSG00000136026:CKAP4	Cytoskeleton-associated protein 4 OS=Homo sapiens OX=9606 GN=CKAP4 PE=1 SV=2	azurophil granule membrane [GO:0035577]; cytoplasmic ribonucleoprotein granule [GO:0036464]; cytoskeleton [GO:0005856]; cytosol [GO:0005829]; endoplasmic reticulum [GO:0005783]; endoplasmic reticulum lumen [GO:0005788]; endoplasmic reticulum membrane [GO:0005789]; extracellular exosome [GO:0070062]; integral component of membrane [GO:0016021]; lamellar body [GO:0042599]; lipid droplet [GO:0005811…	1310000	1560000	2050000	1590000	2020000	1890000	2070000	1730000	60	58	0.244073	0.241796	FALSE	28962.5	-0.327715	0.243589	FALSE	non significant	0.282819
163	125	P35527	KRT9	ENSG00000171403:KRT9	Keratin type I cytoskeletal 9 OS=Homo sapiens OX=9606 GN=KRT9 PE=1 SV=3	cytosol [GO:0005829]; extracellular exosome [GO:0070062]; extracellular space [GO:0005615]; intermediate filament [GO:0005882]; membrane [GO:0016020]; nucleus [GO:0005634]	1690000	868000	646000	960000	804000	1210000	578000	660000	34	34	-0.356643	0.523468	FALSE	0.885497	-2.35219	NA	FALSE	non significant	0.915911
86	49	P04843	RPN1	ENSG00000163902:RPN1	Dolichyl-diphosphooligosaccharide--protein glycosyltransferase subunit 1 OS=Homo sapiens OX=9606 GN=RPN1 PE=1 SV=1	cytosol [GO:0005829]; endoplasmic reticulum [GO:0005783]; endoplasmic reticulum membrane [GO:0005789]; integral component of membrane [GO:0016021]; melanosome [GO:0042470]; membrane [GO:0016020]; oligosaccharyltransferase complex [GO:0008250]; rough endoplasmic reticulum [GO:0005791]	1280000	1370000	1460000	1410000	2510000	2320000	1970000	1750000	57	56	0.631256	0.0394538	FALSE	25399.9	-0.182695	0.559555	FALSE	non significant	0.339599
857	894	P21810	BGN	ENSG00000182492:BGN	Biglycan OS=Homo sapiens OX=9606 GN=BGN PE=1 SV=2	Golgi lumen [GO:0005796]; cell surface [GO:0009986]; collagen-containing extracellular matrix [GO:0062023]; extracellular exosome [GO:0070062]; extracellular matrix [GO:0031012]; extracellular region [GO:0005576]; lysosomal lumen [GO:0043202]; sarcolemma [GO:0042383]; transport vesicle [GO:0030133]	28300	32100	24200	26300	113000	129000	69200	62800	6	6	1.75378	0.0272628	TRUE	8728.91	4.22294	7.95935e-10	TRUE	significantly consistently upregulated	2.72142
44	119	P27797	CALR	ENSG00000179218:CALR	Calreticulin OS=Homo sapiens OX=9606 GN=CALR PE=1 SV=1	Golgi apparatus [GO:0005794]; MHC class I peptide loading complex [GO:0042824]; acrosomal vesicle [GO:0001669]; cell surface [GO:0009986]; collagen-containing extracellular matrix [GO:0062023]; cytoplasm [GO:0005737]; cytosol [GO:0005829]; endocytic vesicle lumen [GO:0071682]; endoplasmic reticulum [GO:0005783]; endoplasmic reticulum lumen [GO:0005788]; endoplasmic reticulum membrane [GO:0005789]…	3630000	3740000	4640000	3610000	2130000	2380000	4840000	4060000	57	57	-0.220085	0.492448	FALSE	82812.9	-0.161121	0.547921	FALSE	non significant	0.188309
2317	2270	Q9UBP4	DKK3	ENSG00000050165:DKK3	Dickkopf-related protein 3 OS=Homo sapiens OX=9606 GN=DKK3 PE=1 SV=2	extracellular space [GO:0005615]	774.334	933.001	948.057	1120	6300	5180	2340	2220	1	1	2.08698	0.0462986	TRUE	9782.89	3.36351	0.00012062	TRUE	significantly consistently upregulated	2.64945
69	207	P61224	RAP1B	ENSG00000127314:RAP1B	Ras-related protein Rap-1b OS=Homo sapiens OX=9606 GN=RAP1B PE=1 SV=1	azurophil granule membrane [GO:0035577]; cell-cell junction [GO:0005911]; cytosol [GO:0005829]; extracellular exosome [GO:0070062]; intracellular [GO:0005622]; lipid droplet [GO:0005811]; membrane [GO:0016020]; plasma membrane [GO:0005886]	280000	242000	255000	313000	233000	271000	209000	170000	42	8	-0.303843	0.199675	FALSE	15551.2	-0.373181	0.224885	FALSE	non significant	0.336732
136	47	Q07954	LRP1	ENSG00000123384:LRP1	Prolow-density lipoprotein receptor-related protein 1 OS=Homo sapiens OX=9606 GN=LRP1 PE=1 SV=2	apical part of cell [GO:0045177]; axonal growth cone [GO:0044295]; basolateral plasma membrane [GO:0016323]; clathrin-coated pit [GO:0005905]; clathrin-coated vesicle [GO:0030136]; dendrite [GO:0030425]; early endosome [GO:0005769]; endocytic vesicle membrane [GO:0030666]; focal adhesion [GO:0005925]; insulin-responsive compartment [GO:0032593]; integral component of plasma membrane [GO:0005887];…	680000	701000	586000	642000	601000	577000	601000	619000	63	63	-0.121665	0.214976	FALSE	40810.7	-0.144296	0.675683	FALSE	non significant	0.132498
156	36	Q7KZF4	SND1	ENSG00000197157:SND1	Staphylococcal nuclease domain-containing protein 1 OS=Homo sapiens OX=9606 GN=SND1 PE=1 SV=1	RISC complex [GO:0016442]; cytoplasm [GO:0005737]; cytosol [GO:0005829]; dense body [GO:0097433]; extracellular exosome [GO:0070062]; melanosome [GO:0042470]; membrane [GO:0016020]; nucleus [GO:0005634]	500000	541000	541000	529000	981000	819000	690000	603000	43	43	0.55108	0.0945326	FALSE	21583.9	0.147778	0.413701	FALSE	non significant	0.285373
92	44	Q8WWI1	LMO7	ENSG00000136153:LMO7	LIM domain only protein 7 OS=Homo sapiens OX=9606 GN=LMO7 PE=1 SV=3	apical plasma membrane [GO:0016324]; cell surface [GO:0009986]; cytoplasm [GO:0005737]; cytosol [GO:0005829]; focal adhesion [GO:0005925]; nuclear envelope [GO:0005635]; nucleus [GO:0005634]; ubiquitin ligase complex [GO:0000151]	865000	981000	802000	910000	526000	541000	496000	542000	50	48	-0.757246	0.00667404	FALSE	42673.9	-0.88324	0.00945267	FALSE	non significant	0.817821
128	95	Q8IVF2	AHNAK2	ENSG00000185567:AHNAK2	Protein AHNAK2 OS=Homo sapiens OX=9606 GN=AHNAK2 PE=1 SV=2	T-tubule [GO:0030315]; Z disc [GO:0030018]; costamere [GO:0043034]; cytoplasm [GO:0005737]; cytoplasmic vesicle membrane [GO:0030659]; cytosol [GO:0005829]; nucleus [GO:0005634]; plasma membrane [GO:0005886]; sarcolemma [GO:0042383]	667000	658000	725000	699000	1310000	1270000	1030000	918000	59	55	0.719967	0.0371976	FALSE	35466.9	2.20957	2.3128e-14	TRUE	significant by RNA only	1.26128
61	62	P20020	ATP2B1	ENSG00000070961:ATP2B1	Plasma membrane calcium-transporting ATPase 1 OS=Homo sapiens OX=9606 GN=ATP2B1 PE=1 SV=3	GABA-ergic synapse [GO:0098982]; apical plasma membrane [GO:0016324]; basolateral plasma membrane [GO:0016323]; cell junction [GO:0030054]; cytoplasmic side of plasma membrane [GO:0009898]; dendritic spine membrane [GO:0032591]; extracellular exosome [GO:0070062]; glutamatergic synapse [GO:0098978]; immunological synapse [GO:0001772]; integral component of plasma membrane [GO:0005887]; integral c…	953000	964000	809000	751000	654000	673000	652000	772000	49	34	-0.337887	0.0706441	FALSE	41612.1	1.14795	4.06845e-06	TRUE	significant by RNA only	0.622798
117	56	P07437	TUBB	ENSG00000196230:TUBB	Tubulin beta chain OS=Homo sapiens OX=9606 GN=TUBB PE=1 SV=2	azurophil granule lumen [GO:0035578]; cell body [GO:0044297]; cytoplasm [GO:0005737]; cytoplasmic ribonucleoprotein granule [GO:0036464]; cytoskeleton [GO:0005856]; extracellular exosome [GO:0070062]; extracellular region [GO:0005576]; membrane raft [GO:0045121]; microtubule [GO:0005874]; nuclear envelope lumen [GO:0005641]; nucleus [GO:0005634]	112000	111000	150000	163000	75600	93600	109000	109000	39	6	-0.469154	0.114501	FALSE	90124	-0.222048	0.566423	FALSE	non significant	0.322761
81	38	P21589	NT5E	ENSG00000135318:NT5E	5'-nucleotidase OS=Homo sapiens OX=9606 GN=NT5E PE=1 SV=1	anchored component of membrane [GO:0031225]; cell surface [GO:0009986]; cytosol [GO:0005829]; extracellular exosome [GO:0070062]; membrane [GO:0016020]; nucleoplasm [GO:0005654]; plasma membrane [GO:0005886]	1440000	1380000	1150000	1160000	1020000	1300000	1780000	2170000	50	50	0.289507	0.513409	FALSE	36678.6	1.42963	0.000727448	TRUE	significant by RNA only	0.64334
220	101	Q13439	GOLGA4	ENSG00000144674:GOLGA4	Golgin subfamily A member 4 OS=Homo sapiens OX=9606 GN=GOLGA4 PE=1 SV=1	Golgi apparatus [GO:0005794]; Golgi membrane [GO:0000139]; cytoplasm [GO:0005737]; cytosol [GO:0005829]; extracellular exosome [GO:0070062]; intracellular membrane-bounded organelle [GO:0043231]; trans-Golgi network [GO:0005802]	442000	477000	444000	435000	723000	756000	615000	551000	51	51	0.556875	0.0436041	FALSE	15252.5	-0.434283	0.0530906	FALSE	non significant	0.491774
103	54	P13639	EEF2	ENSG00000167658:EEF2	Elongation factor 2 OS=Homo sapiens OX=9606 GN=EEF2 PE=1 SV=4	aggresome [GO:0016235]; cytoplasm [GO:0005737]; cytosol [GO:0005829]; extracellular exosome [GO:0070062]; extracellular region [GO:0005576]; ficolin-1-rich granule lumen [GO:1904813]; membrane [GO:0016020]; membrane raft [GO:0045121]; nucleus [GO:0005634]; plasma membrane [GO:0005886]; polysomal ribosome [GO:0042788]; ribonucleoprotein complex [GO:1990904]; secretory granule lumen [GO:0034774]; s…	1110000	1130000	1310000	1360000	1130000	1170000	1180000	1160000	51	51	-0.0815982	0.490588	FALSE	163660	0.411964	0.039992	FALSE	non significant	0.183345
70	42	Q9Y2J2	EPB41L3	ENSG00000082397:EPB41L3	Band 4.1-like protein 3 OS=Homo sapiens OX=9606 GN=EPB41L3 PE=1 SV=2	axolemma [GO:0030673]; cell-cell junction [GO:0005911]; cytoskeleton [GO:0005856]; cytosol [GO:0005829]; juxtaparanode region of axon [GO:0044224]; paranode region of axon [GO:0033270]; plasma membrane [GO:0005886]; postsynaptic density [GO:0014069]	1820000	1740000	1450000	1450000	707000	693000	518000	587000	51	43	-1.36672	0.0041599	TRUE	8226.87	-4.4531	1.36734e-12	TRUE	significantly consistently downregulated	2.46701
151	84	O15031	PLXNB2	ENSG00000196576:PLXNB2	Plexin-B2 OS=Homo sapiens OX=9606 GN=PLXNB2 PE=1 SV=3	cell surface [GO:0009986]; extracellular exosome [GO:0070062]; integral component of plasma membrane [GO:0005887]; semaphorin receptor complex [GO:0002116]	565000	554000	500000	499000	389000	396000	355000	364000	33	32	-0.493898	0.00669157	FALSE	32003.4	0.316063	0.321574	FALSE	non significant	0.395098
27	157	P0CG38	POTEI	ENSG00000196834:POTEI	POTE ankyrin domain family member I OS=Homo sapiens OX=9606 GN=POTEI PE=3 SV=1	extracellular exosome [GO:0070062]; extracellular space [GO:0005615]	20400	9710	35000	23300	21100	10200	4470	4120	61	1	-1.14818	0.185385	FALSE	124.291	-0.620266	0.337891	FALSE	non significant	0.843907
242	32	O75923	DYSF	ENSG00000135636:DYSF	Dysferlin OS=Homo sapiens OX=9606 GN=DYSF PE=1 SV=1	Golgi apparatus [GO:0005794]; T-tubule [GO:0030315]; cytoplasmic vesicle membrane [GO:0030659]; early endosome [GO:0005769]; endocytic vesicle [GO:0030139]; endosome [GO:0005768]; extracellular exosome [GO:0070062]; integral component of membrane [GO:0016021]; lamellipodium [GO:0030027]; late endosome [GO:0005770]; membrane microdomain [GO:0098857]; microtubule [GO:0005874]; microtubule organizin…	378000	399000	349000	357000	204000	211000	161000	169000	39	37	-0.993206	0.0109175	FALSE	8800.63	-3.26357	0.000249675	TRUE	significant by RNA only	1.80039
169	81	Q9P2E9	RRBP1	ENSG00000125844:RRBP1	Ribosome-binding protein 1 OS=Homo sapiens OX=9606 GN=RRBP1 PE=1 SV=5	endoplasmic reticulum [GO:0005783]; integral component of endoplasmic reticulum membrane [GO:0030176]; membrane [GO:0016020]; ribosome [GO:0005840]	557000	552000	560000	550000	858000	639000	712000	567000	53	52	0.323098	0.177588	FALSE	43049.9	0.110837	0.77381	FALSE	non significant	0.189238
94	85	P07237	P4HB	ENSG00000185624:P4HB	Protein disulfide-isomerase OS=Homo sapiens OX=9606 GN=P4HB PE=1 SV=3	endoplasmic reticulum [GO:0005783]; endoplasmic reticulum chaperone complex [GO:0034663]; endoplasmic reticulum lumen [GO:0005788]; endoplasmic reticulum-Golgi intermediate compartment [GO:0005793]; external side of plasma membrane [GO:0009897]; extracellular exosome [GO:0070062]; extracellular region [GO:0005576]; focal adhesion [GO:0005925]; melanosome [GO:0042470]; procollagen-proline 4-dioxyg…	1110000	1110000	1570000	1190000	1870000	1790000	2040000	1530000	43	43	0.53785	0.0459921	FALSE	54611.7	0.166934	0.597754	FALSE	non significant	0.299642
49	99	P15311	EZR	ENSG00000092820:EZR	Ezrin OS=Homo sapiens OX=9606 GN=EZR PE=1 SV=4	Schwann cell microvillus [GO:0097454]; T-tubule [GO:0030315]; actin cytoskeleton [GO:0015629]; actin filament [GO:0005884]; apical part of cell [GO:0045177]; apical plasma membrane [GO:0016324]; astrocyte projection [GO:0097449]; basolateral plasma membrane [GO:0016323]; brush border [GO:0005903]; cell body [GO:0044297]; cell periphery [GO:0071944]; cell projection [GO:0042995]; cell tip [GO:0051…	1530000	1390000	1360000	1410000	982000	996000	957000	1070000	62	37	-0.506626	0.00387413	FALSE	11659.6	-1.2307	2.27794e-06	TRUE	significant by RNA only	0.789625
75	80	P08238	HSP90AB1	ENSG00000096384:HSP90AB1	Heat shock protein HSP 90-beta OS=Homo sapiens OX=9606 GN=HSP90AB1 PE=1 SV=4	HSP90-CDC37 chaperone complex [GO:1990565]; apical plasma membrane [GO:0016324]; aryl hydrocarbon receptor complex [GO:0034751]; axonal growth cone [GO:0044295]; basolateral plasma membrane [GO:0016323]; brush border membrane [GO:0031526]; cell surface [GO:0009986]; cytoplasm [GO:0005737]; cytosol [GO:0005829]; dendritic growth cone [GO:0044294]; extracellular exosome [GO:0070062]; extracellular …	278000	258000	238000	241000	261000	230000	208000	235000	49	14	-0.119985	0.306021	FALSE	81984.6	0.0378077	0.914508	FALSE	non significant	0.0673526
134	130	O95782	AP2A1	ENSG00000196961:AP2A1	AP-2 complex subunit alpha-1 OS=Homo sapiens OX=9606 GN=AP2A1 PE=1 SV=3	AP-2 adaptor complex [GO:0030122]; apical plasma membrane [GO:0016324]; basolateral plasma membrane [GO:0016323]; clathrin coat of trans-Golgi network vesicle [GO:0030130]; clathrin-coated endocytic vesicle [GO:0045334]; clathrin-coated endocytic vesicle membrane [GO:0030669]; cytosol [GO:0005829]; endocytic vesicle membrane [GO:0030666]; endolysosome membrane [GO:0036020]; filopodium tip [GO:003…	385000	428000	414000	472000	287000	307000	305000	324000	43	26	-0.474261	0.0149291	FALSE	8822.13	-0.469593	0.000134123	FALSE	non significant	0.471921
164	67	P68371	TUBB4B	ENSG00000188229:TUBB4B	Tubulin beta-4B chain OS=Homo sapiens OX=9606 GN=TUBB4B PE=1 SV=1	azurophil granule lumen [GO:0035578]; cytoplasm [GO:0005737]; cytoskeleton [GO:0005856]; cytosol [GO:0005829]; extracellular exosome [GO:0070062]; extracellular region [GO:0005576]; extracellular vesicle [GO:1903561]; microtubule [GO:0005874]; nucleus [GO:0005634]	14700	19100	17900	17400	12700	15700	17300	17400	35	3	-0.131046	0.458382	FALSE	24471	-0.318086	0.507762	FALSE	non significant	0.204166
146	61	O43795	MYO1B	ENSG00000128641:MYO1B	Unconventional myosin-Ib OS=Homo sapiens OX=9606 GN=MYO1B PE=1 SV=3	actin filament [GO:0005884]; apical part of cell [GO:0045177]; brush border [GO:0005903]; cell periphery [GO:0071944]; cytoplasm [GO:0005737]; early endosome [GO:0005769]; endosome membrane [GO:0010008]; extracellular exosome [GO:0070062]; filopodium [GO:0030175]; myosin complex [GO:0016459]; perinuclear region of cytoplasm [GO:0048471]; plasma membrane [GO:0005886]	701000	746000	710000	603000	484000	513000	493000	568000	43	38	-0.423425	0.0209793	FALSE	22203.3	-0.562833	0.00720242	FALSE	non significant	0.488178
110	51	Q13308	PTK7	ENSG00000112655:PTK7	Inactive tyrosine-protein kinase 7 OS=Homo sapiens OX=9606 GN=PTK7 PE=1 SV=2	cell-cell junction [GO:0005911]; focal adhesion [GO:0005925]; integral component of plasma membrane [GO:0005887]	969000	1070000	854000	901000	668000	598000	487000	506000	37	37	-0.748035	0.016852	FALSE	16898.9	-0.10901	0.87152	FALSE	non significant	0.285558
135	105	P06733	ENO1	ENSG00000074800:ENO1	Alpha-enolase OS=Homo sapiens OX=9606 GN=ENO1 PE=1 SV=2	M band [GO:0031430]; cell cortex region [GO:0099738]; cell surface [GO:0009986]; cytoplasm [GO:0005737]; cytosol [GO:0005829]; extracellular exosome [GO:0070062]; extracellular space [GO:0005615]; membrane [GO:0016020]; nucleus [GO:0005634]; phosphopyruvate hydratase complex [GO:0000015]; plasma membrane [GO:0005886]	794000	680000	896000	974000	602000	694000	694000	742000	38	38	-0.291617	0.162148	FALSE	146490	-0.0204687	0.956565	FALSE	non significant	0.0772595
184	234	P00387	CYB5R3	ENSG00000100243:CYB5R3	NADH-cytochrome b5 reductase 3 OS=Homo sapiens OX=9606 GN=CYB5R3 PE=1 SV=3	azurophil granule lumen [GO:0035578]; cytoplasm [GO:0005737]; endoplasmic reticulum [GO:0005783]; endoplasmic reticulum membrane [GO:0005789]; extracellular region [GO:0005576]; hemoglobin complex [GO:0005833]; lipid droplet [GO:0005811]; membrane [GO:0016020]; mitochondrial outer membrane [GO:0005741]; mitochondrion [GO:0005739]	627000	703000	684000	712000	1020000	975000	670000	592000	34	34	0.256758	0.455495	FALSE	8946.14	-0.37042	0.445916	FALSE	non significant	0.308396
38	348	P60903	S100A10	ENSG00000197747:S100A10	Protein S100-A10 OS=Homo sapiens OX=9606 GN=S100A10 PE=1 SV=2	collagen-containing extracellular matrix [GO:0062023]; endoplasmic reticulum [GO:0005783]; extracellular exosome [GO:0070062]; extracellular region [GO:0005576]; extrinsic component of plasma membrane [GO:0019897]	9680000	9000000	13200000	15100000	5580000	6490000	6140000	5960000	50	50	-0.958829	0.0438514	FALSE	14926.6	0.296057	0.602047	FALSE	non significant	0.532792
59	115	P04264	KRT1	ENSG00000167768:KRT1	Keratin type II cytoskeletal 1 OS=Homo sapiens OX=9606 GN=KRT1 PE=1 SV=6	blood microparticle [GO:0072562]; collagen-containing extracellular matrix [GO:0062023]; cornified envelope [GO:0001533]; cytoskeleton [GO:0005856]; cytosol [GO:0005829]; extracellular exosome [GO:0070062]; extracellular region [GO:0005576]; extracellular space [GO:0005615]; ficolin-1-rich granule lumen [GO:1904813]; keratin filament [GO:0045095]; membrane [GO:0016020]; nucleus [GO:0005634]	1730000	891000	620000	1120000	1260000	1740000	596000	691000	42	32	-0.0246906	0.934194	FALSE	0.525872	-1.79856	NA	FALSE	non significant	0.210731
60	121	P62879	GNB2	ENSG00000172354:GNB2	Guanine nucleotide-binding protein G(I)/G(S)/G(T) subunit beta-2 OS=Homo sapiens OX=9606 GN=GNB2 PE=1 SV=3	cell body [GO:0044297]; cytosol [GO:0005829]; extracellular exosome [GO:0070062]; extracellular space [GO:0005615]; focal adhesion [GO:0005925]; lysosomal membrane [GO:0005765]; membrane [GO:0016020]; perinuclear region of cytoplasm [GO:0048471]; plasma membrane [GO:0005886]; protein-containing complex [GO:0032991]; vesicle [GO:0031982]	499000	533000	465000	460000	346000	409000	326000	340000	41	20	-0.461737	0.0199739	FALSE	10356.8	-0.389379	0.176314	FALSE	non significant	0.424017
84	200	P62873	GNB1	ENSG00000078369:GNB1	Guanine nucleotide-binding protein G(I)/G(S)/G(T) subunit beta-1 OS=Homo sapiens OX=9606 GN=GNB1 PE=1 SV=3	cell body [GO:0044297]; cytosol [GO:0005829]; dendrite [GO:0030425]; extracellular exosome [GO:0070062]; extracellular vesicle [GO:1903561]; heterotrimeric G-protein complex [GO:0005834]; lysosomal membrane [GO:0005765]; membrane [GO:0016020]; photoreceptor disc membrane [GO:0097381]; photoreceptor inner segment [GO:0001917]; photoreceptor outer segment membrane [GO:0042622]; plasma membrane [GO:…	352000	406000	376000	399000	273000	277000	230000	260000	31	14	-0.559774	0.00961516	FALSE	21218.4	-0.778802	7.72338e-06	FALSE	non significant	0.660267
147	46	P13667	PDIA4	ENSG00000155660:PDIA4	Protein disulfide-isomerase A4 OS=Homo sapiens OX=9606 GN=PDIA4 PE=1 SV=2	cell surface [GO:0009986]; endoplasmic reticulum [GO:0005783]; endoplasmic reticulum lumen [GO:0005788]; extracellular space [GO:0005615]; melanosome [GO:0042470]	635000	655000	704000	601000	898000	940000	1020000	873000	40	40	0.523828	0.00691658	FALSE	24737.8	0.281838	0.268776	FALSE	non significant	0.384232
200	104	P42704	LRPPRC	ENSG00000138095:LRPPRC	Leucine-rich PPR motif-containing protein mitochondrial OS=Homo sapiens OX=9606 GN=LRPPRC PE=1 SV=3	condensed nuclear chromosome [GO:0000794]; cytoskeleton [GO:0005856]; membrane [GO:0016020]; microtubule [GO:0005874]; mitochondrial nucleoid [GO:0042645]; mitochondrion [GO:0005739]; nuclear inner membrane [GO:0005637]; nuclear outer membrane [GO:0005640]; nucleoplasm [GO:0005654]; nucleus [GO:0005634]; perinuclear region of cytoplasm [GO:0048471]; ribonucleoprotein complex [GO:1990904]	466000	537000	636000	589000	543000	523000	690000	594000	42	41	0.0769115	0.666012	FALSE	15213.5	0.20847	0.312828	FALSE	non significant	0.126624
56	65	P08754	GNAI3	ENSG00000065135:GNAI3	Guanine nucleotide-binding protein G(k) subunit alpha OS=Homo sapiens OX=9606 GN=GNAI3 PE=1 SV=3	Golgi apparatus [GO:0005794]; centrosome [GO:0005813]; cytoplasm [GO:0005737]; extracellular exosome [GO:0070062]; heterotrimeric G-protein complex [GO:0005834]; lysosomal membrane [GO:0005765]; membrane [GO:0016020]; membrane raft [GO:0045121]; midbody [GO:0030496]; nucleolus [GO:0005730]; nucleus [GO:0005634]; plasma membrane [GO:0005886]; zymogen granule [GO:0042588]	455000	466000	368000	373000	272000	306000	232000	256000	40	16	-0.640713	0.0181887	FALSE	12854.8	0.21666	0.419656	FALSE	non significant	0.372581
243	102	Q8WVM8	SCFD1	ENSG00000092108:SCFD1	Sec1 family domain-containing protein 1 OS=Homo sapiens OX=9606 GN=SCFD1 PE=1 SV=4	Golgi cisterna membrane [GO:0032580]; Golgi-associated vesicle [GO:0005798]; cis-Golgi network [GO:0005801]; cytosol [GO:0005829]; endoplasmic reticulum membrane [GO:0005789]; plasma membrane [GO:0005886]	503000	521000	493000	542000	1070000	1020000	737000	674000	33	33	0.765823	0.0613048	FALSE	6567.79	-0.315267	0.042914	FALSE	non significant	0.491364
80	74	O43707	ACTN4	ENSG00000130402:ACTN4	Alpha-actinin-4 OS=Homo sapiens OX=9606 GN=ACTN4 PE=1 SV=2	Z disc [GO:0030018]; brush border [GO:0005903]; cell-cell junction [GO:0005911]; cortical cytoskeleton [GO:0030863]; cytoplasm [GO:0005737]; cytosol [GO:0005829]; extracellular exosome [GO:0070062]; extracellular region [GO:0005576]; extracellular space [GO:0005615]; focal adhesion [GO:0005925]; neuron projection [GO:0043005]; nuclear body [GO:0016604]; nucleus [GO:0005634]; perinuclear region of…	571000	632000	770000	844000	371000	429000	361000	416000	46	28	-0.836977	0.0242267	FALSE	51335.6	-0.501556	0.0481962	FALSE	non significant	0.647913
122	111	P23634	ATP2B4	ENSG00000058668:ATP2B4	Plasma membrane calcium-transporting ATPase 4 OS=Homo sapiens OX=9606 GN=ATP2B4 PE=1 SV=2	T-tubule [GO:0030315]; Z disc [GO:0030018]; basolateral plasma membrane [GO:0016323]; caveola [GO:0005901]; glutamatergic synapse [GO:0098978]; integral component of plasma membrane [GO:0005887]; integral component of presynaptic active zone membrane [GO:0099059]; membrane [GO:0016020]; neuron projection [GO:0043005]; plasma membrane [GO:0005886]; protein-containing complex [GO:0032991]; sperm fl…	251000	253000	224000	220000	193000	222000	209000	205000	38	23	-0.193515	0.0826104	FALSE	7791.85	0.300656	0.499342	FALSE	non significant	0.241208
118	457	Q9NQC3	RTN4	ENSG00000115310:RTN4	Reticulon-4 OS=Homo sapiens OX=9606 GN=RTN4 PE=1 SV=2	cell junction [GO:0030054]; cell projection [GO:0042995]; endoplasmic reticulum [GO:0005783]; endoplasmic reticulum membrane [GO:0005789]; endoplasmic reticulum tubular network [GO:0071782]; endoplasmic reticulum tubular network membrane [GO:0098826]; integral component of endoplasmic reticulum membrane [GO:0030176]; neuronal cell body [GO:0043025]; nuclear envelope [GO:0005635]; plasma membrane …	476000	521000	436000	449000	1100000	947000	546000	496000	28	27	0.714873	0.198047	FALSE	51348	-0.0350697	0.916382	FALSE	non significant	0.158336
152	92	P07686	HEXB	ENSG00000049860:HEXB	Beta-hexosaminidase subunit beta OS=Homo sapiens OX=9606 GN=HEXB PE=1 SV=3	acrosomal vesicle [GO:0001669]; azurophil granule [GO:0042582]; azurophil granule lumen [GO:0035578]; extracellular exosome [GO:0070062]; extracellular region [GO:0005576]; lysosomal lumen [GO:0043202]; membrane [GO:0016020]	742000	762000	883000	826000	861000	1060000	1400000	1470000	40	38	0.576406	0.114235	FALSE	19116.3	-0.44823	0.156326	FALSE	non significant	0.508293
12	184	Q562R1	ACTBL2	ENSG00000169067:ACTBL2	Beta-actin-like protein 2 OS=Homo sapiens OX=9606 GN=ACTBL2 PE=1 SV=2	actin cytoskeleton [GO:0015629]; cytoplasm [GO:0005737]; extracellular exosome [GO:0070062]; extracellular space [GO:0005615]; glutamatergic synapse [GO:0098978]	83500	74700	116000	108000	69700	67900	53600	63100	71	4	-0.587796	0.0676856	FALSE	149.788	1.83484	0.00105605	TRUE	significant by RNA only	1.03851
77	256	P51149	RAB7A	ENSG00000075785:RAB7A	Ras-related protein Rab-7a OS=Homo sapiens OX=9606 GN=RAB7A PE=1 SV=1	Golgi apparatus [GO:0005794]; autophagosome membrane [GO:0000421]; cytosol [GO:0005829]; endosome membrane [GO:0010008]; extracellular exosome [GO:0070062]; extrinsic component of lysosome membrane [GO:0032419]; late endosome [GO:0005770]; late endosome membrane [GO:0031902]; lipid droplet [GO:0005811]; lysosomal membrane [GO:0005765]; lysosome [GO:0005764]; melanosome membrane [GO:0033162]; phag…	1020000	1130000	943000	963000	1550000	1870000	1450000	1470000	34	27	0.644425	0.0148827	FALSE	6455	-0.17834	0.671036	FALSE	non significant	0.339009
256	70	Q8TBA6	GOLGA5	ENSG00000066455:GOLGA5	Golgin subfamily A member 5 OS=Homo sapiens OX=9606 GN=GOLGA5 PE=1 SV=3	Golgi apparatus [GO:0005794]; Golgi cisterna [GO:0031985]; Golgi membrane [GO:0000139]; cis-Golgi network [GO:0005801]; integral component of membrane [GO:0016021]; membrane [GO:0016020]; transport vesicle [GO:0030133]	361000	406000	340000	340000	603000	551000	452000	472000	29	29	0.522131	0.0324125	FALSE	5177.99	-0.169419	0.454842	FALSE	non significant	0.29742
106	254	P61106	RAB14	ENSG00000119396:RAB14	Ras-related protein Rab-14 OS=Homo sapiens OX=9606 GN=RAB14 PE=1 SV=4	Golgi membrane [GO:0000139]; Golgi stack [GO:0005795]; cytosol [GO:0005829]; early endosome [GO:0005769]; early endosome membrane [GO:0031901]; extracellular exosome [GO:0070062]; intracellular [GO:0005622]; intracellular membrane-bounded organelle [GO:0043231]; late endosome [GO:0005770]; lysosomal membrane [GO:0005765]; lysosome [GO:0005764]; nuclear outer membrane-endoplasmic reticulum membran…	501000	392000	405000	421000	694000	687000	524000	494000	23	18	0.480864	0.0738199	FALSE	5279.62	-0.206237	0.31054	FALSE	non significant	0.314916
943	853	P12111	COL6A3	ENSG00000163359:COL6A3	Collagen alpha-3(VI) chain OS=Homo sapiens OX=9606 GN=COL6A3 PE=1 SV=5	collagen type VI trimer [GO:0005589]; collagen-containing extracellular matrix [GO:0062023]; endoplasmic reticulum lumen [GO:0005788]; extracellular exosome [GO:0070062]; extracellular matrix [GO:0031012]; extracellular region [GO:0005576]; extracellular space [GO:0005615]; extracellular vesicle [GO:1903561]; sarcolemma [GO:0042383]	14100	18100	15900	12700	29900	33100	33000	27500	5	5	1.02237	0.0106554	TRUE	266767	5.17086	3.54223e-19	TRUE	significantly consistently upregulated	2.29924
238	437	P11233	RALA	ENSG00000006451:RALA	Ras-related protein Ral-A OS=Homo sapiens OX=9606 GN=RALA PE=1 SV=1	Flemming body [GO:0090543]; cell surface [GO:0009986]; cleavage furrow [GO:0032154]; cytoplasmic vesicle membrane [GO:0030659]; extracellular exosome [GO:0070062]; focal adhesion [GO:0005925]; plasma membrane [GO:0005886]	458000	361000	353000	419000	357000	339000	377000	374000	20	9	-0.136869	0.354077	FALSE	3490.07	0.0361812	0.922788	FALSE	non significant	0.070371
167	59	P49411	TUFM	ENSG00000178952:TUFM	Elongation factor Tu mitochondrial OS=Homo sapiens OX=9606 GN=TUFM PE=1 SV=2	extracellular exosome [GO:0070062]; membrane [GO:0016020]; mitochondrial nucleoid [GO:0042645]; mitochondrion [GO:0005739]; synapse [GO:0045202]	807000	1030000	1260000	1190000	1250000	1120000	1300000	1040000	31	31	0.135759	0.503333	FALSE	15430.2	0.336706	0.290699	FALSE	non significant	0.213801
121	83	P35222	CTNNB1	ENSG00000168036:CTNNB1	Catenin beta-1 OS=Homo sapiens OX=9606 GN=CTNNB1 PE=1 SV=1	Schaffer collateral - CA1 synapse [GO:0098685]; Scrib-APC-beta-catenin complex [GO:0034750]; Wnt signalosome [GO:1990909]; Z disc [GO:0030018]; adherens junction [GO:0005912]; apical part of cell [GO:0045177]; basolateral plasma membrane [GO:0016323]; beta-catenin destruction complex [GO:0030877]; beta-catenin-TCF complex [GO:1990907]; beta-catenin-TCF7L2 complex [GO:0070369]; bicellular tight ju…	753000	795000	783000	836000	493000	504000	499000	559000	28	28	-0.623978	0.0029079	FALSE	41808.3	-0.33556	0.123398	FALSE	non significant	0.457583
363	48	Q9UBG0	MRC2	ENSG00000011028:MRC2	C-type mannose receptor 2 OS=Homo sapiens OX=9606 GN=MRC2 PE=1 SV=2	focal adhesion [GO:0005925]; integral component of membrane [GO:0016021]; membrane [GO:0016020]	323000	333000	255000	303000	260000	209000	225000	221000	20	20	-0.407925	0.0437241	FALSE	74638.5	0.341015	0.422446	FALSE	non significant	0.372972
978	596	P12109	COL6A1	ENSG00000142156:COL6A1	Collagen alpha-1(VI) chain OS=Homo sapiens OX=9606 GN=COL6A1 PE=1 SV=3	collagen type VI trimer [GO:0005589]; collagen-containing extracellular matrix [GO:0062023]; endoplasmic reticulum lumen [GO:0005788]; extracellular exosome [GO:0070062]; extracellular matrix [GO:0031012]; extracellular region [GO:0005576]; extracellular space [GO:0005615]; lysosomal membrane [GO:0005765]; membrane [GO:0016020]; protein-containing complex [GO:0032991]; sarcolemma [GO:0042383]	22900	26500	24000	27100	135000	91900	106000	95700	7	7	2.09244	0.0041599	TRUE	35829.1	2.26728	1.63029e-11	TRUE	significantly consistently upregulated	2.1781
73	129	P35241	RDX	ENSG00000137710:RDX	Radixin OS=Homo sapiens OX=9606 GN=RDX PE=1 SV=1	T-tubule [GO:0030315]; apical plasma membrane [GO:0016324]; cell periphery [GO:0071944]; cell tip [GO:0051286]; cell-cell adherens junction [GO:0005913]; cleavage furrow [GO:0032154]; cortical actin cytoskeleton [GO:0030864]; extracellular exosome [GO:0070062]; extracellular space [GO:0005615]; filopodium [GO:0030175]; focal adhesion [GO:0005925]; lamellipodium [GO:0030027]; microvillus [GO:00059…	258000	219000	252000	231000	183000	202000	184000	180000	41	12	-0.358069	0.0199739	FALSE	12171.9	-1.19476	8.45341e-08	TRUE	significant by RNA only	0.65407
141	89	P68363	TUBA1B	ENSG00000123416:TUBA1B	Tubulin alpha-1B chain OS=Homo sapiens OX=9606 GN=TUBA1B PE=1 SV=1	cytoplasm [GO:0005737]; cytoplasmic microtubule [GO:0005881]; membrane raft [GO:0045121]; microtubule [GO:0005874]; microtubule cytoskeleton [GO:0015630]	232000	278000	273000	277000	263000	306000	278000	335000	35	10	0.157166	0.272731	FALSE	67833.3	-0.440603	0.267057	FALSE	non significant	0.26315
193	77	Q9Y4L1	HYOU1	ENSG00000149428:HYOU1	Hypoxia up-regulated protein 1 OS=Homo sapiens OX=9606 GN=HYOU1 PE=1 SV=1	endocytic vesicle lumen [GO:0071682]; endoplasmic reticulum [GO:0005783]; endoplasmic reticulum chaperone complex [GO:0034663]; endoplasmic reticulum lumen [GO:0005788]; extracellular exosome [GO:0070062]; extracellular region [GO:0005576]; focal adhesion [GO:0005925]; membrane [GO:0016020]; smooth endoplasmic reticulum [GO:0005790]	513000	537000	597000	506000	917000	825000	664000	601000	33	32	0.481977	0.0940302	FALSE	23861.2	-0.504637	0.212137	FALSE	non significant	0.493177
212	227	P29992	GNA11	ENSG00000088256:GNA11	Guanine nucleotide-binding protein subunit alpha-11 OS=Homo sapiens OX=9606 GN=GNA11 PE=1 SV=2	cytoplasm [GO:0005737]; extracellular exosome [GO:0070062]; heterotrimeric G-protein complex [GO:0005834]; lysosomal membrane [GO:0005765]; photoreceptor outer segment [GO:0001750]; plasma membrane [GO:0005886]	337000	336000	270000	262000	313000	360000	259000	288000	23	15	0.017848	0.935741	FALSE	8384.83	-0.865195	8.11402e-10	FALSE	non significant	0.124266
108	117	P38646	HSPA9	ENSG00000113013:HSPA9	Stress-70 protein mitochondrial OS=Homo sapiens OX=9606 GN=HSPA9 PE=1 SV=2	cytoplasm [GO:0005737]; extracellular exosome [GO:0070062]; focal adhesion [GO:0005925]; mitochondrial matrix [GO:0005759]; mitochondrial nucleoid [GO:0042645]; mitochondrion [GO:0005739]; nucleolus [GO:0005730]	826000	1060000	1590000	1490000	1080000	896000	1650000	1260000	39	35	-0.0234304	0.980952	FALSE	26920.2	0.0299008	0.931439	FALSE	non significant	0.0264686
219	90	Q9UPN3	MACF1	ENSG00000127603:MACF1	Microtubule-actin cross-linking factor 1 isoforms 1/2/3/5 OS=Homo sapiens OX=9606 GN=MACF1 PE=1 SV=4	Golgi apparatus [GO:0005794]; actin cytoskeleton [GO:0015629]; cytoplasm [GO:0005737]; cytoskeleton [GO:0005856]; membrane [GO:0016020]; microtubule [GO:0005874]; plasma membrane [GO:0005886]; ruffle membrane [GO:0032587]	347000	380000	333000	362000	382000	382000	385000	393000	47	41	0.116881	0.126987	FALSE	54400.5	-0.0833708	0.877528	FALSE	non significant	0.0987142
113	158	P35749	MYH11	ENSG00000133392:MYH11	Myosin-11 OS=Homo sapiens OX=9606 GN=MYH11 PE=1 SV=3	cytosol [GO:0005829]; extracellular exosome [GO:0070062]; melanosome [GO:0042470]; muscle myosin complex [GO:0005859]; myosin filament [GO:0032982]	11000	14600	13700	9310	16200	17200	13500	15100	41	2	0.351015	0.165057	FALSE	307.431	0.0186997	0.962256	FALSE	non significant	0.0810178
96	326	P62834	RAP1A	ENSG00000116473:RAP1A	Ras-related protein Rap-1A OS=Homo sapiens OX=9606 GN=RAP1A PE=1 SV=1	cell junction [GO:0030054]; cytoplasm [GO:0005737]; cytosol [GO:0005829]; early endosome [GO:0005769]; extracellular exosome [GO:0070062]; glutamatergic synapse [GO:0098978]; guanyl-nucleotide exchange factor complex [GO:0032045]; late endosome [GO:0005770]; neuron projection [GO:0043005]; perinuclear region of cytoplasm [GO:0048471]; phagocytic vesicle [GO:0045335]; plasma membrane [GO:0005886];…	31500	27300	36700	29100	20600	28800	22500	19000	37	3	-0.454952	0.0817074	FALSE	1786.78	-0.786104	0.0207126	FALSE	non significant	0.59803
74	477	P60660	MYL6	ENSG00000092841:MYL6	Myosin light polypeptide 6 OS=Homo sapiens OX=9606 GN=MYL6 PE=1 SV=2	brush border [GO:0005903]; cytosol [GO:0005829]; extracellular exosome [GO:0070062]; membrane [GO:0016020]; myosin complex [GO:0016459]; unconventional myosin complex [GO:0016461]; vesicle [GO:0031982]	895000	931000	1280000	1120000	571000	720000	944000	805000	25	17	-0.475221	0.111301	FALSE	84494.8	-1.38784	4.45736e-11	TRUE	significant by RNA only	0.812115
294	106	P06756	ITGAV	ENSG00000138448:ITGAV	Integrin alpha-V OS=Homo sapiens OX=9606 GN=ITGAV PE=1 SV=2	alphav-beta3 integrin-HMGB1 complex [GO:0035868]; alphav-beta3 integrin-IGF-1-IGF1R complex [GO:0035867]; alphav-beta3 integrin-PKCalpha complex [GO:0035866]; cell surface [GO:0009986]; cytosol [GO:0005829]; external side of plasma membrane [GO:0009897]; extracellular exosome [GO:0070062]; filopodium membrane [GO:0031527]; focal adhesion [GO:0005925]; integral component of plasma membrane [GO:000…	541000	533000	523000	506000	445000	499000	400000	412000	32	32	-0.260156	0.0791988	FALSE	68631.3	-0.853775	0.0922191	FALSE	non significant	0.471291
52	242	P62820	RAB1A	ENSG00000138069:RAB1A	Ras-related protein Rab-1A OS=Homo sapiens OX=9606 GN=RAB1A PE=1 SV=3	Golgi apparatus [GO:0005794]; Golgi membrane [GO:0000139]; cytosol [GO:0005829]; early endosome [GO:0005769]; endoplasmic reticulum membrane [GO:0005789]; extracellular exosome [GO:0070062]; melanosome [GO:0042470]; transport vesicle membrane [GO:0030658]	495000	383000	411000	417000	551000	452000	554000	454000	35	12	0.237295	0.1621	FALSE	9335.82	-0.747145	0.00667587	FALSE	non significant	0.421063
226	66	Q9Y2D5	AKAP2	ENSG00000241978:AKAP2	A-kinase anchor protein 2 OS=Homo sapiens OX=9606 GN=AKAP2 PE=1 SV=3	NA	359000	367000	354000	383000	311000	256000	237000	233000	22	22	-0.496514	0.0425373	FALSE	27337	-0.438897	0.0524364	FALSE	non significant	0.466817
226	66	Q9Y2D5	PALM2-AKAP2	ENSG00000157654:PALM2-AKAP2	A-kinase anchor protein 2 OS=Homo sapiens OX=9606 GN=AKAP2 PE=1 SV=3	NA	359000	367000	354000	383000	311000	256000	237000	233000	22	22	-0.496514	0.0425373	FALSE	27828.5	-0.447326	0.049233	FALSE	non significant	0.471279
612	580	P51911	CNN1	ENSG00000130176:CNN1	Calponin-1 OS=Homo sapiens OX=9606 GN=CNN1 PE=1 SV=2	cytoskeleton [GO:0005856]; focal adhesion [GO:0005925]	114000	130000	158000	163000	80000	77900	47900	50200	11	8	-1.14211	0.0263146	TRUE	10658.2	-4.0436	0.0222095	TRUE	significantly consistently downregulated	2.14901
188	98	P29317	EPHA2	ENSG00000142627:EPHA2	Ephrin type-A receptor 2 OS=Homo sapiens OX=9606 GN=EPHA2 PE=1 SV=2	cell surface [GO:0009986]; focal adhesion [GO:0005925]; integral component of plasma membrane [GO:0005887]; lamellipodium [GO:0030027]; lamellipodium membrane [GO:0031258]; leading edge membrane [GO:0031256]; neuron projection [GO:0043005]; plasma membrane [GO:0005886]; receptor complex [GO:0043235]; ruffle membrane [GO:0032587]; tight junction [GO:0070160]	728000	744000	653000	649000	637000	645000	470000	526000	33	29	-0.2842	0.144411	FALSE	20114.7	0.0172292	0.960235	FALSE	non significant	0.0699753
203	113	P46940	IQGAP1	ENSG00000140575:IQGAP1	Ras GTPase-activating-like protein IQGAP1 OS=Homo sapiens OX=9606 GN=IQGAP1 PE=1 SV=1	actin filament [GO:0005884]; axon [GO:0030424]; cytoplasm [GO:0005737]; cytoplasmic ribonucleoprotein granule [GO:0036464]; cytosol [GO:0005829]; extracellular exosome [GO:0070062]; extrinsic component of cytoplasmic side of plasma membrane [GO:0031234]; focal adhesion [GO:0005925]; growth cone [GO:0030426]; lateral plasma membrane [GO:0016328]; membrane raft [GO:0045121]; microtubule [GO:0005874…	681000	624000	621000	656000	599000	515000	450000	425000	34	34	-0.376446	0.0879159	FALSE	48035.5	0.28378	0.236824	FALSE	non significant	0.326845
119	183	P14314	PRKCSH	ENSG00000130175:PRKCSH	Glucosidase 2 subunit beta OS=Homo sapiens OX=9606 GN=PRKCSH PE=1 SV=2	endoplasmic reticulum [GO:0005783]; endoplasmic reticulum lumen [GO:0005788]; glucosidase II complex [GO:0017177]; intracellular membrane-bounded organelle [GO:0043231]	956000	922000	1200000	934000	1910000	1610000	1790000	1340000	28	28	0.729033	0.0201153	FALSE	27625.5	0.480172	0.0153217	FALSE	non significant	0.59166
206	146	Q92896	GLG1	ENSG00000090863:GLG1	Golgi apparatus protein 1 OS=Homo sapiens OX=9606 GN=GLG1 PE=1 SV=2	Golgi apparatus [GO:0005794]; Golgi membrane [GO:0000139]; extracellular exosome [GO:0070062]; extracellular matrix [GO:0031012]; integral component of membrane [GO:0016021]; membrane [GO:0016020]; plasma membrane [GO:0005886]	366000	382000	365000	344000	807000	742000	438000	447000	33	33	0.740328	0.128758	FALSE	21659.4	-0.0278518	0.95794	FALSE	non significant	0.143595
312	128	Q9Y4G6	TLN2	ENSG00000171914:TLN2	Talin-2 OS=Homo sapiens OX=9606 GN=TLN2 PE=1 SV=4	actin cytoskeleton [GO:0015629]; cytoplasm [GO:0005737]; focal adhesion [GO:0005925]; plasma membrane [GO:0005886]; ruffle [GO:0001726]; synapse [GO:0045202]	39400	42700	43000	40700	39000	44400	42600	46800	27	7	0.0596592	0.513105	FALSE	6183.6	-0.15783	0.69079	FALSE	non significant	0.0970363
201	136	P40939	HADHA	ENSG00000084754:HADHA	Trifunctional enzyme subunit alpha mitochondrial OS=Homo sapiens OX=9606 GN=HADHA PE=1 SV=2	mitochondrial fatty acid beta-oxidation multienzyme complex [GO:0016507]; mitochondrial inner membrane [GO:0005743]; mitochondrial nucleoid [GO:0042645]; mitochondrion [GO:0005739]	513000	560000	669000	655000	451000	455000	618000	543000	31	31	-0.213692	0.280501	FALSE	13478.4	-0.0968411	0.725983	FALSE	non significant	0.143855
233	285	Q15084	PDIA6	ENSG00000143870:PDIA6	Protein disulfide-isomerase A6 OS=Homo sapiens OX=9606 GN=PDIA6 PE=1 SV=1	cytosol [GO:0005829]; endoplasmic reticulum [GO:0005783]; endoplasmic reticulum chaperone complex [GO:0034663]; endoplasmic reticulum lumen [GO:0005788]; endoplasmic reticulum membrane [GO:0005789]; endoplasmic reticulum-Golgi intermediate compartment [GO:0005793]; extracellular exosome [GO:0070062]; extracellular space [GO:0005615]; melanosome [GO:0042470]; plasma membrane [GO:0005886]	565000	619000	696000	596000	550000	654000	668000	681000	26	26	0.0441822	0.748715	FALSE	40632.6	-0.054632	0.859747	FALSE	non significant	0.0491301
342	118	Q8WX93	PALLD	ENSG00000129116:PALLD	Palladin OS=Homo sapiens OX=9606 GN=PALLD PE=1 SV=3	Z disc [GO:0030018]; actin cytoskeleton [GO:0015629]; actin filament [GO:0005884]; axon [GO:0030424]; cytosol [GO:0005829]; focal adhesion [GO:0005925]; growth cone [GO:0030426]; lamellipodium [GO:0030027]; nucleus [GO:0005634]; plasma membrane [GO:0005886]; podosome [GO:0002102]; ruffle [GO:0001726]	233000	239000	223000	252000	273000	281000	198000	228000	22	22	0.0494173	0.846097	FALSE	30553	-0.296803	0.292913	FALSE	non significant	0.121108
210	103	Q6DD88	ATL3	ENSG00000184743:ATL3	Atlastin-3 OS=Homo sapiens OX=9606 GN=ATL3 PE=1 SV=1	endoplasmic reticulum [GO:0005783]; endoplasmic reticulum membrane [GO:0005789]; endoplasmic reticulum tubular network [GO:0071782]; endoplasmic reticulum tubular network membrane [GO:0098826]; integral component of membrane [GO:0016021]; membrane [GO:0016020]	420000	460000	410000	420000	694000	668000	544000	593000	25	24	0.547355	0.0219737	FALSE	25004.4	-0.66479	0.000549587	FALSE	non significant	0.603221
123	135	P09525	ANXA4	ENSG00000196975:ANXA4	Annexin A4 OS=Homo sapiens OX=9606 GN=ANXA4 PE=1 SV=4	cell surface [GO:0009986]; collagen-containing extracellular matrix [GO:0062023]; cytoplasm [GO:0005737]; cytosol [GO:0005829]; extracellular exosome [GO:0070062]; nuclear membrane [GO:0031965]; nucleus [GO:0005634]; perinuclear region of cytoplasm [GO:0048471]; plasma membrane [GO:0005886]; vesicle membrane [GO:0012506]	681000	1310000	1280000	1260000	732000	770000	834000	906000	36	31	-0.482945	0.244501	FALSE	5649.86	-0.0513652	0.907162	FALSE	non significant	0.157501
848	1800	P98172	EFNB1	ENSG00000090776:EFNB1	Ephrin-B1 OS=Homo sapiens OX=9606 GN=EFNB1 PE=1 SV=1	cytoplasm [GO:0005737]; extracellular exosome [GO:0070062]; integral component of plasma membrane [GO:0005887]; membrane raft [GO:0045121]; nucleus [GO:0005634]; plasma membrane [GO:0005886]; synapse [GO:0045202]	184000	285000	263000	351000	31900	31800	51500	59100	2	2	-2.63539	0.00496917	TRUE	1705.01	1.68821	1.79785e-10	TRUE	inconsistently deregulated but significant in both	2.10929
131	192	P23396	RPS3	ENSG00000149273:RPS3	40S ribosomal protein S3 OS=Homo sapiens OX=9606 GN=RPS3 PE=1 SV=2	NF-kappaB complex [GO:0071159]; cytoplasm [GO:0005737]; cytosol [GO:0005829]; cytosolic small ribosomal subunit [GO:0022627]; dendrite [GO:0030425]; endoplasmic reticulum [GO:0005783]; extracellular exosome [GO:0070062]; focal adhesion [GO:0005925]; membrane [GO:0016020]; mitochondrial inner membrane [GO:0005743]; mitochondrial matrix [GO:0005759]; mitotic spindle [GO:0072686]; nucleolus [GO:0005…	519000	575000	561000	555000	1010000	905000	784000	720000	32	32	0.629528	0.0364426	FALSE	49430.9	0.263434	0.5508	FALSE	non significant	0.407233
140	82	P16615	ATP2A2	ENSG00000174437:ATP2A2	Sarcoplasmic/endoplasmic reticulum calcium ATPase 2 OS=Homo sapiens OX=9606 GN=ATP2A2 PE=1 SV=1	apical ectoplasmic specialization [GO:0061831]; calcium ion-transporting ATPase complex [GO:0090534]; endoplasmic reticulum [GO:0005783]; endoplasmic reticulum membrane [GO:0005789]; extrinsic component of cytoplasmic side of plasma membrane [GO:0031234]; integral component of plasma membrane [GO:0005887]; longitudinal sarcoplasmic reticulum [GO:0014801]; membrane [GO:0016020]; nucleoplasm [GO:00…	816000	865000	797000	801000	1520000	1450000	1090000	956000	30	30	0.613281	0.0876804	FALSE	13640.2	0.145016	0.590548	FALSE	non significant	0.29822
99	126	P50281	MMP14	ENSG00000157227:MMP14	Matrix metalloproteinase-14 OS=Homo sapiens OX=9606 GN=MMP14 PE=1 SV=3	Golgi lumen [GO:0005796]; cytoplasmic vesicle [GO:0031410]; cytosol [GO:0005829]; extracellular matrix [GO:0031012]; extracellular space [GO:0005615]; focal adhesion [GO:0005925]; integral component of plasma membrane [GO:0005887]; intermediate filament cytoskeleton [GO:0045111]; macropinosome [GO:0044354]; melanosome [GO:0042470]; nucleus [GO:0005634]; plasma membrane [GO:0005886]	1660000	1720000	1490000	1550000	899000	941000	1140000	1200000	41	41	-0.61907	0.0268903	FALSE	109663	1.1809	0.00480144	TRUE	significant by RNA only	0.855019
842	960	Q8N4A0	POC1B-GALNT4	ENSG00000259075:POC1B-GALNT4	Polypeptide N-acetylgalactosaminyltransferase 4 OS=Homo sapiens OX=9606 GN=GALNT4 PE=1 SV=2	Golgi apparatus [GO:0005794]; Golgi membrane [GO:0000139]; extracellular exosome [GO:0070062]; integral component of membrane [GO:0016021]; perinuclear region of cytoplasm [GO:0048471]	76600	71200	72600	70100	163000	204000	182000	203000	6	5	1.37219	0.00442599	TRUE	8858.7	3.23742	7.41759e-13	TRUE	significantly consistently upregulated	2.10769
842	960	Q8N4A0	GALNT4	ENSG00000257594:GALNT4	Polypeptide N-acetylgalactosaminyltransferase 4 OS=Homo sapiens OX=9606 GN=GALNT4 PE=1 SV=2	Golgi apparatus [GO:0005794]; Golgi membrane [GO:0000139]; extracellular exosome [GO:0070062]; integral component of membrane [GO:0016021]; perinuclear region of cytoplasm [GO:0048471]	76600	71200	72600	70100	163000	204000	182000	203000	6	5	1.37219	0.00442599	TRUE	9244.43	3.22136	6.85363e-13	TRUE	significantly consistently upregulated	2.10246
182	518	P16070	CD44	ENSG00000026508:CD44	CD44 antigen OS=Homo sapiens OX=9606 GN=CD44 PE=1 SV=3	Golgi apparatus [GO:0005794]; apical plasma membrane [GO:0016324]; basolateral plasma membrane [GO:0016323]; cell projection [GO:0042995]; cell surface [GO:0009986]; cytosol [GO:0005829]; extracellular exosome [GO:0070062]; focal adhesion [GO:0005925]; integral component of plasma membrane [GO:0005887]; lamellipodium membrane [GO:0031258]; macrophage migration inhibitory factor receptor complex […	386000	370000	276000	303000	422000	440000	486000	629000	18	18	0.566473	0.0591004	FALSE	9316.76	1.08839	0.000306	TRUE	significant by RNA only	0.785204
104	148	P08648	ITGA5	ENSG00000161638:ITGA5	Integrin alpha-5 OS=Homo sapiens OX=9606 GN=ITGA5 PE=1 SV=2	Golgi apparatus [GO:0005794]; alphav-beta3 integrin-vitronectin complex [GO:0071062]; cell surface [GO:0009986]; cytoplasmic vesicle [GO:0031410]; endoplasmic reticulum [GO:0005783]; external side of plasma membrane [GO:0009897]; focal adhesion [GO:0005925]; integrin complex [GO:0008305]; plasma membrane [GO:0005886]; ruffle [GO:0001726]; synapse [GO:0045202]	1490000	1470000	1170000	1240000	1110000	1060000	880000	908000	33	33	-0.44015	0.0432061	FALSE	40911.2	0.449553	0.196576	FALSE	non significant	0.444827
196	140	P46459	NSF	ENSG00000073969:NSF	Vesicle-fusing ATPase OS=Homo sapiens OX=9606 GN=NSF PE=1 SV=3	Golgi membrane [GO:0000139]; Golgi stack [GO:0005795]; cytosol [GO:0005829]; dendritic shaft [GO:0043198]; lysosomal membrane [GO:0005765]; plasma membrane [GO:0005886]; postsynaptic density [GO:0014069]	500000	548000	509000	499000	607000	581000	543000	542000	33	33	0.144757	0.0834793	FALSE	5822.74	-0.432021	0.0666848	FALSE	non significant	0.250077
327	127	Q14254	FLOT2	ENSG00000132589:FLOT2	Flotillin-2 OS=Homo sapiens OX=9606 GN=FLOT2 PE=1 SV=2	acrosomal membrane [GO:0002080]; anchored component of presynaptic active zone membrane [GO:0099029]; basolateral plasma membrane [GO:0016323]; caveola [GO:0005901]; cell-cell adherens junction [GO:0005913]; cell-cell contact zone [GO:0044291]; cytoplasmic vesicle [GO:0031410]; dendrite cytoplasm [GO:0032839]; endocytic vesicle [GO:0030139]; endosome [GO:0005768]; extracellular exosome [GO:007006…	327000	368000	325000	333000	389000	345000	366000	377000	25	25	0.126508	0.134636	FALSE	5641.93	-0.450549	0.0202384	FALSE	non significant	0.238743
205	197	P67936	TPM4	ENSG00000167460:TPM4	Tropomyosin alpha-4 chain OS=Homo sapiens OX=9606 GN=TPM4 PE=1 SV=3	actin filament [GO:0005884]; cortical cytoskeleton [GO:0030863]; cytoskeleton [GO:0005856]; cytosol [GO:0005829]; extracellular exosome [GO:0070062]; focal adhesion [GO:0005925]; membrane [GO:0016020]; muscle thin filament tropomyosin [GO:0005862]; podosome [GO:0002102]; stress fiber [GO:0001725]	322000	317000	323000	406000	318000	265000	290000	271000	29	13	-0.257981	0.12083	FALSE	76378.2	-0.838833	4.26945e-07	FALSE	non significant	0.465192
90	187	P61019	RAB2A	ENSG00000104388:RAB2A	Ras-related protein Rab-2A OS=Homo sapiens OX=9606 GN=RAB2A PE=1 SV=1	Golgi apparatus [GO:0005794]; Golgi membrane [GO:0000139]; cytosol [GO:0005829]; endoplasmic reticulum membrane [GO:0005789]; endoplasmic reticulum-Golgi intermediate compartment membrane [GO:0033116]; extracellular exosome [GO:0070062]; lysosomal membrane [GO:0005765]; melanosome [GO:0042470]; nucleus [GO:0005634]	732000	770000	756000	729000	1390000	1070000	939000	770000	36	13	0.481004	0.166289	FALSE	10957.6	-0.97205	3.23046e-06	FALSE	non significant	0.683784
285	237	P04844	RPN2	ENSG00000118705:RPN2	Dolichyl-diphosphooligosaccharide--protein glycosyltransferase subunit 2 OS=Homo sapiens OX=9606 GN=RPN2 PE=1 SV=3	autophagosome membrane [GO:0000421]; endoplasmic reticulum membrane [GO:0005789]; integral component of membrane [GO:0016021]; membrane [GO:0016020]; oligosaccharyltransferase complex [GO:0008250]; rough endoplasmic reticulum [GO:0005791]	352000	357000	323000	315000	585000	682000	470000	449000	23	23	0.698544	0.048112	FALSE	35309	-0.18094	0.691275	FALSE	non significant	0.35552
305	182	P27816	MAP4	ENSG00000047849:MAP4	Microtubule-associated protein 4 OS=Homo sapiens OX=9606 GN=MAP4 PE=1 SV=3	axon [GO:0030424]; axoneme [GO:0005930]; cytosol [GO:0005829]; microtubule [GO:0005874]; microtubule associated complex [GO:0005875]; microtubule cytoskeleton [GO:0015630]; mitotic spindle [GO:0072686]; neuron projection [GO:0043005]; plasma membrane [GO:0005886]; postsynaptic density [GO:0014069]	223000	211000	268000	239000	333000	301000	268000	234000	22	22	0.271696	0.182682	FALSE	21671.6	-0.302058	0.422396	FALSE	non significant	0.286475
270	282	Q9HD45	TM9SF3	ENSG00000077147:TM9SF3	Transmembrane 9 superfamily member 3 OS=Homo sapiens OX=9606 GN=TM9SF3 PE=1 SV=2	integral component of membrane [GO:0016021]; membrane [GO:0016020]	509000	551000	481000	475000	1960000	1990000	925000	836000	21	21	1.50225	0.0710476	FALSE	31517.5	-0.320936	0.148117	FALSE	non significant	0.694352
130	294	P51148	RAB5C	ENSG00000108774:RAB5C	Ras-related protein Rab-5C OS=Homo sapiens OX=9606 GN=RAB5C PE=1 SV=2	azurophil granule membrane [GO:0035577]; early endosome [GO:0005769]; early endosome membrane [GO:0031901]; endocytic vesicle [GO:0030139]; endosome [GO:0005768]; extracellular exosome [GO:0070062]; lipid droplet [GO:0005811]; lysosomal membrane [GO:0005765]; melanosome [GO:0042470]; plasma membrane [GO:0005886]	349000	345000	273000	325000	831000	662000	445000	448000	28	19	0.884988	0.0729009	FALSE	6782.01	-0.263145	0.420225	FALSE	non significant	0.482577
221	263	P61158	ACTR3	ENSG00000115091:ACTR3	Actin-related protein 3 OS=Homo sapiens OX=9606 GN=ACTR3 PE=1 SV=3	Arp2/3 protein complex [GO:0005885]; actin cortical patch [GO:0030479]; actin cytoskeleton [GO:0015629]; brush border [GO:0005903]; cell-cell junction [GO:0005911]; cytoplasm [GO:0005737]; cytosol [GO:0005829]; extracellular exosome [GO:0070062]; focal adhesion [GO:0005925]; lamellipodium [GO:0030027]; membrane [GO:0016020]; nucleus [GO:0005634]; site of double-strand break [GO:0035861]	381000	361000	439000	464000	351000	432000	372000	388000	19	18	-0.0923495	0.538004	FALSE	35742.6	-0.896214	6.49885e-07	FALSE	non significant	0.287689
222	169	Q14699	RFTN1	ENSG00000131378:RFTN1	Raftlin OS=Homo sapiens OX=9606 GN=RFTN1 PE=1 SV=4	cytoplasm [GO:0005737]; early endosome [GO:0005769]; endosome [GO:0005768]; extracellular exosome [GO:0070062]; membrane raft [GO:0045121]; plasma membrane [GO:0005886]; protein-containing complex [GO:0032991]	529000	490000	419000	408000	254000	310000	234000	287000	22	22	-0.766708	0.0132627	FALSE	5179.27	-0.986478	0.000996985	FALSE	non significant	0.869678
183	194	O43852	CALU	ENSG00000128595:CALU	Calumenin OS=Homo sapiens OX=9606 GN=CALU PE=1 SV=2	Golgi apparatus [GO:0005794]; endoplasmic reticulum [GO:0005783]; endoplasmic reticulum lumen [GO:0005788]; endoplasmic reticulum membrane [GO:0005789]; extracellular region [GO:0005576]; melanosome [GO:0042470]; membrane [GO:0016020]; sarcoplasmic reticulum lumen [GO:0033018]	857000	873000	1100000	750000	1700000	1600000	1180000	917000	25	25	0.592198	0.137867	FALSE	64985.7	-0.997624	0.0115588	FALSE	non significant	0.76863
1382	1794	Q15582	TGFBI	ENSG00000120708:TGFBI	Transforming growth factor-beta-induced protein ig-h3 OS=Homo sapiens OX=9606 GN=TGFBI PE=1 SV=1	basement membrane [GO:0005604]; collagen-containing extracellular matrix [GO:0062023]; extracellular exosome [GO:0070062]; extracellular matrix [GO:0031012]; extracellular region [GO:0005576]; extracellular space [GO:0005615]; plasma membrane [GO:0005886]; trans-Golgi network [GO:0005802]	12700	14600	11500	12100	80600	78200	69000	77200	2	2	2.58307	0.000779271	TRUE	88690.2	1.70514	1.30566e-05	TRUE	significantly consistently upregulated	2.09869
171	93	Q16891	IMMT	ENSG00000132305:IMMT	MICOS complex subunit MIC60 OS=Homo sapiens OX=9606 GN=IMMT PE=1 SV=1	MICOS complex [GO:0061617]; membrane [GO:0016020]; mitochondrial inner membrane [GO:0005743]; mitochondrion [GO:0005739]	847000	1060000	1090000	1030000	1080000	951000	1530000	1660000	25	25	0.374621	0.278594	FALSE	6447.02	0.211846	0.441098	FALSE	non significant	0.281713
105	166	P63092	GNAS	ENSG00000087460:GNAS	Guanine nucleotide-binding protein G(s) subunit alpha isoforms short OS=Homo sapiens OX=9606 GN=GNAS PE=1 SV=1	cytoplasm [GO:0005737]; cytosol [GO:0005829]; extracellular exosome [GO:0070062]; heterotrimeric G-protein complex [GO:0005834]; intrinsic component of membrane [GO:0031224]; membrane [GO:0016020]; plasma membrane [GO:0005886]; trans-Golgi network membrane [GO:0032588]	759000	812000	706000	738000	469000	388000	447000	427000	28	23	-0.800552	0.00387413	FALSE	34481.1	-0.861825	0.0111353	FALSE	non significant	0.830624
105	173	Q5JWF2	GNAS	ENSG00000087460:GNAS	Guanine nucleotide-binding protein G(s) subunit alpha isoforms XLas OS=Homo sapiens OX=9606 GN=GNAS PE=1 SV=2	apical plasma membrane [GO:0016324]; cytosol [GO:0005829]; dendrite [GO:0030425]; extracellular exosome [GO:0070062]; heterotrimeric G-protein complex [GO:0005834]; membrane [GO:0016020]	759000	812000	706000	738000	469000	388000	447000	427000	28	23	-0.800552	0.00387413	FALSE	34481.1	-0.861825	0.0111353	FALSE	non significant	0.830624
159	350	Q06830	PRDX1	ENSG00000117450:PRDX1	Peroxiredoxin-1 OS=Homo sapiens OX=9606 GN=PRDX1 PE=1 SV=1	cytoplasm [GO:0005737]; cytosol [GO:0005829]; extracellular exosome [GO:0070062]; extracellular space [GO:0005615]; melanosome [GO:0042470]; nucleus [GO:0005634]	648000	661000	762000	726000	883000	881000	972000	887000	36	24	0.373305	0.0186335	FALSE	15057.7	-0.201019	0.68401	FALSE	non significant	0.273937
276	123	P55072	VCP	ENSG00000165280:VCP	Transitional endoplasmic reticulum ATPase OS=Homo sapiens OX=9606 GN=VCP PE=1 SV=4	ATPase complex [GO:1904949]; Derlin-1 retrotranslocation complex [GO:0036513]; VCP-NPL4-UFD1 AAA ATPase complex [GO:0034098]; VCP-NSFL1C complex [GO:1990730]; azurophil granule lumen [GO:0035578]; cytoplasm [GO:0005737]; cytoplasmic stress granule [GO:0010494]; cytosol [GO:0005829]; endoplasmic reticulum [GO:0005783]; endoplasmic reticulum membrane [GO:0005789]; extracellular exosome [GO:0070062]…	452000	459000	475000	488000	607000	510000	557000	507000	31	31	0.218869	0.0834793	FALSE	42895.9	-0.605714	0.00109948	FALSE	non significant	0.364104
2059	1899	Q9Y6R1	SLC4A4	ENSG00000080493:SLC4A4	Electrogenic sodium bicarbonate cotransporter 1 OS=Homo sapiens OX=9606 GN=SLC4A4 PE=1 SV=1	basolateral plasma membrane [GO:0016323]; extracellular exosome [GO:0070062]; integral component of plasma membrane [GO:0005887]; plasma membrane [GO:0005886]	16700	15900	11200	11700	4560	9880	4830	5110	1	1	-1.18679	0.0411507	TRUE	4011.25	-3.30786	0.000541324	TRUE	significantly consistently downregulated	1.98135
190	721	P09471	GNAO1	ENSG00000087258:GNAO1	Guanine nucleotide-binding protein G(o) subunit alpha OS=Homo sapiens OX=9606 GN=GNAO1 PE=1 SV=4	cell body [GO:0044297]; dendrite [GO:0030425]; heterotrimeric G-protein complex [GO:0005834]; myelin sheath [GO:0043209]; plasma membrane [GO:0005886]	19100	22700	18000	17500	6560	7130	6170	5420	15	2	-1.61247	0.00229584	TRUE	203.831	-2.13942	0.00398942	TRUE	significantly consistently downregulated	1.85735
194	628	P19105	MYL12A	ENSG00000101608:MYL12A	Myosin regulatory light chain 12A OS=Homo sapiens OX=9606 GN=MYL12A PE=1 SV=2	cytosol [GO:0005829]; extracellular exosome [GO:0070062]; myosin complex [GO:0016459]	413000	455000	507000	492000	239000	214000	351000	313000	16	5	-0.741093	0.0496205	FALSE	55744.8	-1.26634	4.35423e-07	TRUE	significant by RNA only	0.96875
194	629	O14950	MYL12A	ENSG00000101608:MYL12A	Myosin regulatory light chain 12B OS=Homo sapiens OX=9606 GN=MYL12B PE=1 SV=2	cell cortex region [GO:0099738]; cytosol [GO:0005829]; extracellular exosome [GO:0070062]; myosin complex [GO:0016459]	413000	455000	507000	492000	239000	214000	351000	313000	16	5	-0.741093	0.0496205	FALSE	55744.8	-1.26634	4.35423e-07	TRUE	significant by RNA only	0.96875
194	629	O14950	MYL12B	ENSG00000118680:MYL12B	Myosin regulatory light chain 12B OS=Homo sapiens OX=9606 GN=MYL12B PE=1 SV=2	cell cortex region [GO:0099738]; cytosol [GO:0005829]; extracellular exosome [GO:0070062]; myosin complex [GO:0016459]	413000	455000	507000	492000	239000	214000	351000	313000	16	5	-0.741093	0.0496205	FALSE	35324.4	-1.05946	3.46994e-08	TRUE	significant by RNA only	0.886092
311	252	P62136	PPP1CA	ENSG00000172531:PPP1CA	Serine/threonine-protein phosphatase PP1-alpha catalytic subunit OS=Homo sapiens OX=9606 GN=PPP1CA PE=1 SV=1	PTW/PP1 phosphatase complex [GO:0072357]; cell-cell adherens junction [GO:0005913]; cytoplasm [GO:0005737]; cytosol [GO:0005829]; dendritic spine [GO:0043197]; extracellular exosome [GO:0070062]; glutamatergic synapse [GO:0098978]; glycogen granule [GO:0042587]; nucleolus [GO:0005730]; nucleoplasm [GO:0005654]; nucleus [GO:0005634]; perikaryon [GO:0043204]; plasma membrane [GO:0005886]; presynaps…	19000	22700	21900	21100	18300	24500	20100	21700	19	3	-0.00170431	0.965873	FALSE	9667.57	-0.139299	0.683273	FALSE	non significant	0.015408
251	112	Q8NBS9	TXNDC5	ENSG00000239264:TXNDC5	Thioredoxin domain-containing protein 5 OS=Homo sapiens OX=9606 GN=TXNDC5 PE=1 SV=2	azurophil granule lumen [GO:0035578]; endoplasmic reticulum [GO:0005783]; endoplasmic reticulum lumen [GO:0005788]; extracellular exosome [GO:0070062]; extracellular region [GO:0005576]; lysosomal lumen [GO:0043202]	433000	475000	611000	490000	638000	691000	747000	608000	22	22	0.417907	0.0598474	FALSE	39129.7	-0.00279956	0.993301	FALSE	non significant	0.0342046
189	168	Q15019	2019-09-02	ENSG00000168385:SEPT2	Septin-2 OS=Homo sapiens OX=9606 GN=SEPT2 PE=1 SV=1	axoneme [GO:0005930]; ciliary membrane [GO:0060170]; cleavage furrow [GO:0032154]; condensed chromosome kinetochore [GO:0000777]; cytoplasm [GO:0005737]; exocyst [GO:0000145]; extracellular exosome [GO:0070062]; microtubule cytoskeleton [GO:0015630]; midbody [GO:0030496]; non-motile cilium [GO:0097730]; nucleus [GO:0005634]; perinuclear region of cytoplasm [GO:0048471]; photoreceptor connecting c…	703000	704000	778000	745000	513000	601000	698000	669000	26	24	-0.239979	0.160268	FALSE	30663.6	-0.482536	0.000354065	FALSE	non significant	0.340292
216	143	Q16181	2019-09-07	ENSG00000122545:SEPT7	Septin-7 OS=Homo sapiens OX=9606 GN=SEPT7 PE=1 SV=2	axoneme [GO:0005930]; cleavage furrow [GO:0032154]; condensed chromosome kinetochore [GO:0000777]; cytosol [GO:0005829]; extracellular exosome [GO:0070062]; microtubule cytoskeleton [GO:0015630]; midbody [GO:0030496]; non-motile cilium [GO:0097730]; nucleus [GO:0005634]; septin complex [GO:0031105]; septin ring [GO:0005940]; sperm annulus [GO:0097227]; spindle [GO:0005819]; stress fiber [GO:00017…	753000	730000	747000	733000	1030000	879000	854000	810000	28	27	0.270077	0.0926593	FALSE	16153.5	-0.408137	0.00396121	FALSE	non significant	0.332007
173	279	P49257	LMAN1	ENSG00000074695:LMAN1	Protein ERGIC-53 OS=Homo sapiens OX=9606 GN=LMAN1 PE=1 SV=2	COPII-coated ER to Golgi transport vesicle [GO:0030134]; ER to Golgi transport vesicle membrane [GO:0012507]; Golgi membrane [GO:0000139]; collagen-containing extracellular matrix [GO:0062023]; cytosol [GO:0005829]; endoplasmic reticulum membrane [GO:0005789]; endoplasmic reticulum-Golgi intermediate compartment [GO:0005793]; endoplasmic reticulum-Golgi intermediate compartment membrane [GO:00331…	584000	621000	572000	535000	1060000	1070000	737000	787000	21	21	0.660335	0.0547462	FALSE	26025.3	-0.18995	0.577619	FALSE	non significant	0.354162
277	142	P40926	MDH2	ENSG00000146701:MDH2	Malate dehydrogenase mitochondrial OS=Homo sapiens OX=9606 GN=MDH2 PE=1 SV=3	cytoplasm [GO:0005737]; extracellular exosome [GO:0070062]; membrane [GO:0016020]; mitochondrial matrix [GO:0005759]; mitochondrion [GO:0005739]; nucleus [GO:0005634]	328000	347000	617000	578000	398000	354000	465000	374000	23	23	-0.233104	0.611955	FALSE	7713.64	-0.0427369	0.917856	FALSE	non significant	0.0998107
62	68	Q05682	CALD1	ENSG00000122786:CALD1	Caldesmon OS=Homo sapiens OX=9606 GN=CALD1 PE=1 SV=3	actin cap [GO:0030478]; actin cytoskeleton [GO:0015629]; cytoskeleton [GO:0005856]; cytosol [GO:0005829]; intracellular membrane-bounded organelle [GO:0043231]; myofibril [GO:0030016]; plasma membrane [GO:0005886]	1420000	1420000	2340000	2670000	995000	775000	662000	657000	50	49	-1.34555	0.0309888	TRUE	75724.4	-2.23849	1.96401e-06	TRUE	significantly consistently downregulated	1.73551
174	139	P12814	ACTN1	ENSG00000072110:ACTN1	Alpha-actinin-1 OS=Homo sapiens OX=9606 GN=ACTN1 PE=1 SV=2	Z disc [GO:0030018]; brush border [GO:0005903]; cell projection [GO:0042995]; cell-cell junction [GO:0005911]; cytoplasm [GO:0005737]; cytosol [GO:0005829]; extracellular exosome [GO:0070062]; extracellular region [GO:0005576]; extracellular space [GO:0005615]; fascia adherens [GO:0005916]; focal adhesion [GO:0005925]; glutamatergic synapse [GO:0098978]; plasma membrane [GO:0005886]; platelet alp…	169000	181000	212000	232000	104000	115000	94500	95400	32	12	-0.957391	0.0106554	FALSE	47507.3	-1.00085	0.000669365	TRUE	significant by RNA only	0.978878
280	134	Q9UHB6	LIMA1	ENSG00000050405:LIMA1	LIM domain and actin-binding protein 1 OS=Homo sapiens OX=9606 GN=LIMA1 PE=1 SV=1	actin cytoskeleton [GO:0015629]; brush border membrane [GO:0031526]; cleavage furrow [GO:0032154]; cytosol [GO:0005829]; focal adhesion [GO:0005925]; plasma membrane [GO:0005886]; ruffle [GO:0001726]; stress fiber [GO:0001725]	699000	678000	783000	748000	547000	545000	492000	471000	28	27	-0.500889	0.00961516	FALSE	25776.2	-0.285119	0.315596	FALSE	non significant	0.377906
261	131	Q12959	DLG1	ENSG00000075711:DLG1	Disks large homolog 1 OS=Homo sapiens OX=9606 GN=DLG1 PE=1 SV=2	Golgi apparatus [GO:0005794]; MPP7-DLG1-LIN7 complex [GO:0097025]; apical plasma membrane [GO:0016324]; basement membrane [GO:0005604]; basolateral plasma membrane [GO:0016323]; bicellular tight junction [GO:0005923]; cell junction [GO:0030054]; cell projection membrane [GO:0031253]; cell-cell junction [GO:0005911]; cytoplasm [GO:0005737]; cytoplasmic side of plasma membrane [GO:0009898]; cytosol…	400000	378000	350000	395000	294000	244000	293000	294000	20	19	-0.436991	0.0193899	FALSE	11414.2	-0.247068	0.511387	FALSE	non significant	0.328583
314	292	P05388	RPLP0	ENSG00000089157:RPLP0	60S acidic ribosomal protein P0 OS=Homo sapiens OX=9606 GN=RPLP0 PE=1 SV=1	cytoplasm [GO:0005737]; cytoplasmic ribonucleoprotein granule [GO:0036464]; cytosol [GO:0005829]; cytosolic large ribosomal subunit [GO:0022625]; endoplasmic reticulum [GO:0005783]; extracellular exosome [GO:0070062]; focal adhesion [GO:0005925]; membrane [GO:0016020]; nucleus [GO:0005634]; postsynapse [GO:0098794]; postsynaptic density [GO:0014069]; ribonucleoprotein complex [GO:1990904]	527000	566000	494000	514000	373000	472000	588000	522000	21	21	-0.103908	0.556468	FALSE	94071.2	0.383397	0.293626	FALSE	non significant	0.199594
211	489	P61225	RAP2B	ENSG00000181467:RAP2B	Ras-related protein Rap-2b OS=Homo sapiens OX=9606 GN=RAP2B PE=1 SV=1	bicellular tight junction [GO:0005923]; cell-cell contact zone [GO:0044291]; cytosol [GO:0005829]; extracellular exosome [GO:0070062]; membrane [GO:0016020]; membrane raft [GO:0045121]; plasma membrane [GO:0005886]; recycling endosome membrane [GO:0055038]; specific granule membrane [GO:0035579]; tertiary granule membrane [GO:0070821]	171000	141000	130000	135000	107000	120000	102000	104000	20	6	-0.414204	0.0434746	FALSE	6413.31	0.402329	0.279485	FALSE	non significant	0.408224
346	172	P11717	IGF2R	ENSG00000197081:IGF2R	Cation-independent mannose-6-phosphate receptor OS=Homo sapiens OX=9606 GN=IGF2R PE=1 SV=3	Golgi apparatus [GO:0005794]; cell surface [GO:0009986]; clathrin coat [GO:0030118]; clathrin-coated vesicle membrane [GO:0030665]; early endosome [GO:0005769]; endocytic vesicle [GO:0030139]; endosome [GO:0005768]; extracellular exosome [GO:0070062]; focal adhesion [GO:0005925]; integral component of plasma membrane [GO:0005887]; late endosome [GO:0005770]; lysosomal membrane [GO:0005765]; membr…	336000	365000	314000	313000	371000	338000	359000	389000	31	31	0.133746	0.177286	FALSE	54305.7	-0.847711	1.45159e-05	FALSE	non significant	0.336716
231	133	Q13748	TUBA3C	ENSG00000198033:TUBA3C	Tubulin alpha-3C/D chain OS=Homo sapiens OX=9606 GN=TUBA3C PE=1 SV=3	NA	3610	3240	2600	2940	2240	2890	2570	1960	26	1	-0.359081	0.131995	FALSE	2112.57	-2.2844	0.000677487	TRUE	significant by RNA only	0.905695
231	133	Q13748	TUBA3D	ENSG00000075886:TUBA3D	Tubulin alpha-3C/D chain OS=Homo sapiens OX=9606 GN=TUBA3C PE=1 SV=3	NA	3610	3240	2600	2940	2240	2890	2570	1960	26	1	-0.359081	0.131995	FALSE	34.2963	-0.845383	0.196411	FALSE	non significant	0.550964
715	726	O75781	PALM	ENSG00000099864:PALM	Paralemmin-1 OS=Homo sapiens OX=9606 GN=PALM PE=1 SV=2	apicolateral plasma membrane [GO:0016327]; axon [GO:0030424]; basolateral plasma membrane [GO:0016323]; cytoplasmic vesicle [GO:0031410]; dendritic spine membrane [GO:0032591]; filopodium membrane [GO:0031527]; intracellular membrane-bounded organelle [GO:0043231]; intrinsic component of the cytoplasmic side of the plasma membrane [GO:0031235]; nucleus [GO:0005634]; plasma membrane [GO:0005886]; …	200000	170000	137000	163000	89500	78400	62300	71800	8	7	-1.14961	0.00802738	TRUE	1984.91	-2.518	4.35626e-06	TRUE	significantly consistently downregulated	1.70139
324	570	P30048	PRDX3	ENSG00000165672:PRDX3	Thioredoxin-dependent peroxide reductase mitochondrial OS=Homo sapiens OX=9606 GN=PRDX3 PE=1 SV=3	cytoplasm [GO:0005737]; cytosol [GO:0005829]; early endosome [GO:0005769]; mitochondrial matrix [GO:0005759]; mitochondrion [GO:0005739]; protein-containing complex [GO:0032991]	401000	414000	577000	485000	500000	474000	681000	558000	18	17	0.237575	0.305666	FALSE	10848.8	-0.74211	0.000790345	FALSE	non significant	0.419889
262	395	P62081	RPS7	ENSG00000171863:RPS7	40S ribosomal protein S7 OS=Homo sapiens OX=9606 GN=RPS7 PE=1 SV=1	cytosol [GO:0005829]; cytosolic small ribosomal subunit [GO:0022627]; focal adhesion [GO:0005925]; membrane [GO:0016020]; microtubule organizing center [GO:0005815]; nucleolus [GO:0005730]; nucleoplasm [GO:0005654]; nucleus [GO:0005634]; protein-containing complex [GO:0032991]; ribonucleoprotein complex [GO:1990904]; ribosome [GO:0005840]; small-subunit processome [GO:0032040]; synapse [GO:004520…	592000	538000	610000	618000	656000	639000	609000	526000	22	22	0.0433926	0.738056	FALSE	28357.5	0.306882	0.432666	FALSE	non significant	0.115397
414	100	O14936	CASK	ENSG00000147044:CASK	Peripheral plasma membrane protein CASK OS=Homo sapiens OX=9606 GN=CASK PE=1 SV=3	Schaffer collateral - CA1 synapse [GO:0098685]; actin cytoskeleton [GO:0015629]; basement membrane [GO:0005604]; basolateral plasma membrane [GO:0016323]; cell-cell junction [GO:0005911]; ciliary membrane [GO:0060170]; cytoplasm [GO:0005737]; cytosol [GO:0005829]; focal adhesion [GO:0005925]; nuclear lamina [GO:0005652]; nuclear matrix [GO:0016363]; nucleolus [GO:0005730]; plasma membrane [GO:000…	229000	230000	222000	244000	169000	186000	159000	157000	24	22	-0.463141	0.0140503	FALSE	4797.16	0.741876	0.000904921	FALSE	non significant	0.586168
160	213	P54652	HSPA2	ENSG00000126803:HSPA2	Heat shock-related 70 kDa protein 2 OS=Homo sapiens OX=9606 GN=HSPA2 PE=1 SV=1	CatSper complex [GO:0036128]; blood microparticle [GO:0072562]; cell surface [GO:0009986]; cytoplasm [GO:0005737]; cytosol [GO:0005829]; extracellular exosome [GO:0070062]; male germ cell nucleus [GO:0001673]; meiotic spindle [GO:0072687]; membrane [GO:0016020]; nucleus [GO:0005634]; plasma membrane [GO:0005886]; synaptonemal complex [GO:0000795]	16900	19800	19400	19200	5110	5880	15600	17200	28	1	-0.782048	0.208171	FALSE	23.5463	0.0549413	0.934313	FALSE	non significant	0.207284
322	71	O94832	MYO1D	ENSG00000176658:MYO1D	Unconventional myosin-Id OS=Homo sapiens OX=9606 GN=MYO1D PE=1 SV=2	apical dendrite [GO:0097440]; axolemma [GO:0030673]; axon [GO:0030424]; basolateral plasma membrane [GO:0016323]; brush border [GO:0005903]; cell cortex [GO:0005938]; cytoplasmic vesicle [GO:0031410]; cytosol [GO:0005829]; early endosome [GO:0005769]; endosome [GO:0005768]; extracellular exosome [GO:0070062]; myelin sheath [GO:0043209]; myosin complex [GO:0016459]; neuron projection [GO:0043005];…	393000	465000	366000	359000	226000	205000	180000	186000	26	25	-0.99001	0.00479511	FALSE	3997.78	0.203364	0.838061	FALSE	non significant	0.448701
1937	3197	O60494	CUBN	ENSG00000107611:CUBN	Cubilin OS=Homo sapiens OX=9606 GN=CUBN PE=1 SV=5	Golgi apparatus [GO:0005794]; apical plasma membrane [GO:0016324]; brush border membrane [GO:0031526]; clathrin-coated pit [GO:0005905]; cytosol [GO:0005829]; endocytic vesicle [GO:0030139]; endoplasmic reticulum [GO:0005783]; endosome membrane [GO:0010008]; extracellular exosome [GO:0070062]; extrinsic component of external side of plasma membrane [GO:0031232]; lysosomal lumen [GO:0043202]; lyso…	20400	24500	21400	22300	4010	4250	4460	2860	1	1	-2.50761	0.00442599	TRUE	177.124	1.13088	0.000522701	TRUE	inconsistently deregulated but significant in both	1.68399
2100	2019	P28827	PTPRM	ENSG00000173482:PTPRM	Receptor-type tyrosine-protein phosphatase mu OS=Homo sapiens OX=9606 GN=PTPRM PE=1 SV=2	cell-cell adherens junction [GO:0005913]; cell-cell junction [GO:0005911]; cytoplasm [GO:0005737]; integral component of plasma membrane [GO:0005887]; lamellipodium [GO:0030027]; perinuclear region of cytoplasm [GO:0048471]; plasma membrane [GO:0005886]	2570	1590	2080	2690	715.072	738.523	781.641	599.481	1	1	-1.65546	0.0120644	TRUE	8982.29	-1.70361	7.14533e-09	TRUE	significantly consistently downregulated	1.67936
63	633	P0DP24	CALM1	ENSG00000198668:CALM1	Calmodulin-2 OS=Homo sapiens OX=9606 GN=CALM2 PE=1 SV=1	calcium channel complex [GO:0034704]; catalytic complex [GO:1902494]; centrosome [GO:0005813]; cytoplasm [GO:0005737]; nucleus [GO:0005634]; plasma membrane [GO:0005886]; protein-containing complex [GO:0032991]; sarcomere [GO:0030017]; spindle microtubule [GO:0005876]; spindle pole [GO:0000922]; vesicle [GO:0031982]	2710000	3510000	3790000	3870000	1040000	1080000	1980000	2250000	21	21	-1.12818	0.0598474	FALSE	24325.8	-0.471039	0.0368459	FALSE	non significant	0.728983
63	633	P0DP24	CALM2	ENSG00000143933:CALM2	Calmodulin-2 OS=Homo sapiens OX=9606 GN=CALM2 PE=1 SV=1	calcium channel complex [GO:0034704]; catalytic complex [GO:1902494]; centrosome [GO:0005813]; cytoplasm [GO:0005737]; nucleus [GO:0005634]; plasma membrane [GO:0005886]; protein-containing complex [GO:0032991]; sarcomere [GO:0030017]; spindle microtubule [GO:0005876]; spindle pole [GO:0000922]; vesicle [GO:0031982]	2710000	3510000	3790000	3870000	1040000	1080000	1980000	2250000	21	21	-1.12818	0.0598474	FALSE	51480.3	-1.11262	2.08908e-06	TRUE	significant by RNA only	1.12037
63	633	P0DP24	CALM3	ENSG00000160014:CALM3	Calmodulin-2 OS=Homo sapiens OX=9606 GN=CALM2 PE=1 SV=1	calcium channel complex [GO:0034704]; catalytic complex [GO:1902494]; centrosome [GO:0005813]; cytoplasm [GO:0005737]; nucleus [GO:0005634]; plasma membrane [GO:0005886]; protein-containing complex [GO:0032991]; sarcomere [GO:0030017]; spindle microtubule [GO:0005876]; spindle pole [GO:0000922]; vesicle [GO:0031982]	2710000	3510000	3790000	3870000	1040000	1080000	1980000	2250000	21	21	-1.12818	0.0598474	FALSE	13218.7	-0.28539	0.380105	FALSE	non significant	0.567425
63	634	P0DP23	CALM1	ENSG00000198668:CALM1	Calmodulin-1 OS=Homo sapiens OX=9606 GN=CALM1 PE=1 SV=1	calcium channel complex [GO:0034704]; catalytic complex [GO:1902494]; centrosome [GO:0005813]; cytoplasm [GO:0005737]; cytosol [GO:0005829]; extracellular region [GO:0005576]; nucleoplasm [GO:0005654]; nucleus [GO:0005634]; plasma membrane [GO:0005886]; protein-containing complex [GO:0032991]; sarcomere [GO:0030017]; spindle microtubule [GO:0005876]; spindle pole [GO:0000922]; vesicle [GO:0031982]	2710000	3510000	3790000	3870000	1040000	1080000	1980000	2250000	21	21	-1.12818	0.0598474	FALSE	24325.8	-0.471039	0.0368459	FALSE	non significant	0.728983
63	634	P0DP23	CALM2	ENSG00000143933:CALM2	Calmodulin-1 OS=Homo sapiens OX=9606 GN=CALM1 PE=1 SV=1	calcium channel complex [GO:0034704]; catalytic complex [GO:1902494]; centrosome [GO:0005813]; cytoplasm [GO:0005737]; cytosol [GO:0005829]; extracellular region [GO:0005576]; nucleoplasm [GO:0005654]; nucleus [GO:0005634]; plasma membrane [GO:0005886]; protein-containing complex [GO:0032991]; sarcomere [GO:0030017]; spindle microtubule [GO:0005876]; spindle pole [GO:0000922]; vesicle [GO:0031982]	2710000	3510000	3790000	3870000	1040000	1080000	1980000	2250000	21	21	-1.12818	0.0598474	FALSE	51480.3	-1.11262	2.08908e-06	TRUE	significant by RNA only	1.12037
63	634	P0DP23	CALM3	ENSG00000160014:CALM3	Calmodulin-1 OS=Homo sapiens OX=9606 GN=CALM1 PE=1 SV=1	calcium channel complex [GO:0034704]; catalytic complex [GO:1902494]; centrosome [GO:0005813]; cytoplasm [GO:0005737]; cytosol [GO:0005829]; extracellular region [GO:0005576]; nucleoplasm [GO:0005654]; nucleus [GO:0005634]; plasma membrane [GO:0005886]; protein-containing complex [GO:0032991]; sarcomere [GO:0030017]; spindle microtubule [GO:0005876]; spindle pole [GO:0000922]; vesicle [GO:0031982]	2710000	3510000	3790000	3870000	1040000	1080000	1980000	2250000	21	21	-1.12818	0.0598474	FALSE	13218.7	-0.28539	0.380105	FALSE	non significant	0.567425
63	635	P0DP25	CALM1	ENSG00000198668:CALM1	Calmodulin-3 OS=Homo sapiens OX=9606 GN=CALM3 PE=1 SV=1	calcium channel complex [GO:0034704]; catalytic complex [GO:1902494]; centrosome [GO:0005813]; cytoplasm [GO:0005737]; growth cone [GO:0030426]; mitochondrial membrane [GO:0031966]; myelin sheath [GO:0043209]; nucleus [GO:0005634]; plasma membrane [GO:0005886]; protein-containing complex [GO:0032991]; sarcomere [GO:0030017]; spindle microtubule [GO:0005876]; spindle pole [GO:0000922]; synaptic ve…	2710000	3510000	3790000	3870000	1040000	1080000	1980000	2250000	21	21	-1.12818	0.0598474	FALSE	24325.8	-0.471039	0.0368459	FALSE	non significant	0.728983
63	635	P0DP25	CALM2	ENSG00000143933:CALM2	Calmodulin-3 OS=Homo sapiens OX=9606 GN=CALM3 PE=1 SV=1	calcium channel complex [GO:0034704]; catalytic complex [GO:1902494]; centrosome [GO:0005813]; cytoplasm [GO:0005737]; growth cone [GO:0030426]; mitochondrial membrane [GO:0031966]; myelin sheath [GO:0043209]; nucleus [GO:0005634]; plasma membrane [GO:0005886]; protein-containing complex [GO:0032991]; sarcomere [GO:0030017]; spindle microtubule [GO:0005876]; spindle pole [GO:0000922]; synaptic ve…	2710000	3510000	3790000	3870000	1040000	1080000	1980000	2250000	21	21	-1.12818	0.0598474	FALSE	51480.3	-1.11262	2.08908e-06	TRUE	significant by RNA only	1.12037
63	635	P0DP25	CALM3	ENSG00000160014:CALM3	Calmodulin-3 OS=Homo sapiens OX=9606 GN=CALM3 PE=1 SV=1	calcium channel complex [GO:0034704]; catalytic complex [GO:1902494]; centrosome [GO:0005813]; cytoplasm [GO:0005737]; growth cone [GO:0030426]; mitochondrial membrane [GO:0031966]; myelin sheath [GO:0043209]; nucleus [GO:0005634]; plasma membrane [GO:0005886]; protein-containing complex [GO:0032991]; sarcomere [GO:0030017]; spindle microtubule [GO:0005876]; spindle pole [GO:0000922]; synaptic ve…	2710000	3510000	3790000	3870000	1040000	1080000	1980000	2250000	21	21	-1.12818	0.0598474	FALSE	13218.7	-0.28539	0.380105	FALSE	non significant	0.567425
334	319	P36873	PPP1CC	ENSG00000186298:PPP1CC	Serine/threonine-protein phosphatase PP1-gamma catalytic subunit OS=Homo sapiens OX=9606 GN=PPP1CC PE=1 SV=1	PTW/PP1 phosphatase complex [GO:0072357]; cleavage furrow [GO:0032154]; condensed chromosome kinetochore [GO:0000777]; cytoplasm [GO:0005737]; cytosol [GO:0005829]; dendritic spine [GO:0043197]; focal adhesion [GO:0005925]; glutamatergic synapse [GO:0098978]; midbody [GO:0030496]; mitochondrial outer membrane [GO:0005741]; mitochondrion [GO:0005739]; nuclear speck [GO:0016607]; nucleolus [GO:0005…	20300	22100	17400	17300	16400	25200	15400	20400	19	3	0.00560271	0.961483	FALSE	12996.6	-0.667529	0.00024274	FALSE	non significant	0.0611553
359	116	Q15436	SEC23A	ENSG00000100934:SEC23A	Protein transport protein Sec23A OS=Homo sapiens OX=9606 GN=SEC23A PE=1 SV=2	COPII vesicle coat [GO:0030127]; ER to Golgi transport vesicle membrane [GO:0012507]; Golgi membrane [GO:0000139]; cytosol [GO:0005829]; endoplasmic reticulum exit site [GO:0070971]; endoplasmic reticulum membrane [GO:0005789]; extrinsic component of membrane [GO:0019898]; perinuclear region of cytoplasm [GO:0048471]	149000	167000	156000	171000	223000	209000	197000	204000	23	20	0.373498	0.0124433	FALSE	21439.7	-1.03045	1.29788e-05	TRUE	significant by RNA only	0.62038
213	286	P08865	RPSA	ENSG00000168028:RPSA	40S ribosomal protein SA OS=Homo sapiens OX=9606 GN=RPSA PE=1 SV=4	cytoplasm [GO:0005737]; cytosol [GO:0005829]; cytosolic small ribosomal subunit [GO:0022627]; extracellular exosome [GO:0070062]; membrane [GO:0016020]; nucleoplasm [GO:0005654]; nucleus [GO:0005634]; plasma membrane [GO:0005886]	329000	356000	365000	337000	453000	441000	351000	301000	26	26	0.156573	0.509546	FALSE	50499.8	0.266042	0.522049	FALSE	non significant	0.204095
379	114	Q08378	GOLGA3	ENSG00000090615:GOLGA3	Golgin subfamily A member 3 OS=Homo sapiens OX=9606 GN=GOLGA3 PE=1 SV=2	Golgi apparatus [GO:0005794]; Golgi cisterna membrane [GO:0032580]; Golgi membrane [GO:0000139]; Golgi transport complex [GO:0017119]; cytoplasm [GO:0005737]; cytosol [GO:0005829]; extrinsic component of Golgi membrane [GO:0090498]; membrane [GO:0016020]; nucleolus [GO:0005730]; nucleoplasm [GO:0005654]; nucleus [GO:0005634]	151000	164000	142000	131000	218000	234000	187000	158000	24	24	0.438764	0.0875247	FALSE	23885	-0.29448	0.0758184	FALSE	non significant	0.359454
168	147	P26006	ITGA3	ENSG00000005884:ITGA3	Integrin alpha-3 OS=Homo sapiens OX=9606 GN=ITGA3 PE=1 SV=5	basolateral plasma membrane [GO:0016323]; cell periphery [GO:0071944]; cell surface [GO:0009986]; excitatory synapse [GO:0060076]; external side of plasma membrane [GO:0009897]; extracellular exosome [GO:0070062]; filopodium membrane [GO:0031527]; focal adhesion [GO:0005925]; growth cone filopodium [GO:1990812]; integrin alpha3-beta1 complex [GO:0034667]; integrin complex [GO:0008305]; invadopodi…	653000	725000	694000	742000	462000	458000	552000	662000	30	30	-0.399062	0.0972042	FALSE	125807	0.407458	0.19972	FALSE	non significant	0.403238
234	564	P01111	NRAS	ENSG00000213281:NRAS	GTPase NRas OS=Homo sapiens OX=9606 GN=NRAS PE=1 SV=1	Golgi apparatus [GO:0005794]; Golgi membrane [GO:0000139]; extracellular exosome [GO:0070062]; membrane [GO:0016020]; plasma membrane [GO:0005886]; tertiary granule membrane [GO:0070821]	33100	31300	27900	27300	17600	16400	16600	14000	18	5	-0.888611	0.00436619	FALSE	8308.7	-0.297667	0.254363	FALSE	non significant	0.514306
230	290	Q13509	TUBB3	ENSG00000258947:TUBB3	Tubulin beta-3 chain OS=Homo sapiens OX=9606 GN=TUBB3 PE=1 SV=2	axon [GO:0030424]; cytoplasm [GO:0005737]; dendrite [GO:0030425]; extracellular exosome [GO:0070062]; filopodium [GO:0030175]; growth cone [GO:0030426]; lamellipodium [GO:0030027]; microtubule [GO:0005874]; nucleus [GO:0005634]	2790	2730	2430	3000	3750	7440	2770	3690	24	1	0.688737	0.239555	FALSE	8905.25	1.24098	0.00701269	TRUE	significant by RNA only	0.924505
116	318	Q14108	SCARB2	ENSG00000138760:SCARB2	Lysosome membrane protein 2 OS=Homo sapiens OX=9606 GN=SCARB2 PE=1 SV=2	Golgi membrane [GO:0000139]; clathrin-coated vesicle membrane [GO:0030665]; endocytic vesicle membrane [GO:0030666]; endoplasmic reticulum membrane [GO:0005789]; endosome membrane [GO:0010008]; extracellular exosome [GO:0070062]; focal adhesion [GO:0005925]; integral component of membrane [GO:0016021]; late endosome membrane [GO:0031902]; lysosomal lumen [GO:0043202]; lysosomal membrane [GO:00057…	1180000	1300000	1220000	1160000	1140000	1500000	2570000	3020000	22	22	0.759936	0.234752	FALSE	23366.2	-0.220563	0.57194	FALSE	non significant	0.409407
177	162	P07900	HSP90AA1	ENSG00000080824:HSP90AA1	Heat shock protein HSP 90-alpha OS=Homo sapiens OX=9606 GN=HSP90AA1 PE=1 SV=5	axonal growth cone [GO:0044295]; cell surface [GO:0009986]; cytoplasm [GO:0005737]; cytosol [GO:0005829]; dendritic growth cone [GO:0044294]; endocytic vesicle lumen [GO:0071682]; extracellular exosome [GO:0070062]; extracellular region [GO:0005576]; ficolin-1-rich granule lumen [GO:1904813]; lysosomal lumen [GO:0043202]; melanosome [GO:0042470]; membrane [GO:0016020]; myelin sheath [GO:0043209];…	85800	90700	121000	119000	94100	107000	73800	81400	31	10	-0.225224	0.354909	FALSE	41420.6	-0.245695	0.393147	FALSE	non significant	0.235237
369	160	O75955	FLOT1	ENSG00000137312:FLOT1	Flotillin-1 OS=Homo sapiens OX=9606 GN=FLOT1 PE=1 SV=3	GABA-ergic synapse [GO:0098982]; basolateral plasma membrane [GO:0016323]; caveola [GO:0005901]; cell-cell adherens junction [GO:0005913]; cell-cell contact zone [GO:0044291]; cell-cell junction [GO:0005911]; centriolar satellite [GO:0034451]; cytoplasmic vesicle [GO:0031410]; dopaminergic synapse [GO:0098691]; early endosome [GO:0005769]; endosome [GO:0005768]; external side of plasma membrane […	488000	565000	433000	436000	415000	385000	427000	491000	22	22	-0.161878	0.325743	FALSE	8930.27	-0.158694	0.554007	FALSE	non significant	0.160278
1740	2348	Q9H0R8	GABARAPL1	ENSG00000139112:GABARAPL1	Gamma-aminobutyric acid receptor-associated protein-like 1 OS=Homo sapiens OX=9606 GN=GABARAPL1 PE=1 SV=1	Golgi apparatus [GO:0005794]; autophagosome [GO:0005776]; autophagosome membrane [GO:0000421]; cell body [GO:0044297]; cytoplasmic vesicle membrane [GO:0030659]; cytosol [GO:0005829]; dendrite cytoplasm [GO:0032839]; dendrite membrane [GO:0032590]; endoplasmic reticulum [GO:0005783]; intracellular [GO:0005622]; microtubule [GO:0005874]	9730	9610	8880	8560	22200	29000	24600	29000	1	1	1.51065	0.00436619	TRUE	4041.48	-1.84399	1.77205e-07	TRUE	inconsistently deregulated but significant in both	1.66902
214	418	P23284	PPIB	ENSG00000166794:PPIB	Peptidyl-prolyl cis-trans isomerase B OS=Homo sapiens OX=9606 GN=PPIB PE=1 SV=2	endoplasmic reticulum [GO:0005783]; endoplasmic reticulum chaperone complex [GO:0034663]; endoplasmic reticulum lumen [GO:0005788]; extracellular exosome [GO:0070062]; focal adhesion [GO:0005925]; melanosome [GO:0042470]; membrane [GO:0016020]; nucleus [GO:0005634]; perinuclear region of cytoplasm [GO:0048471]; protein-containing complex [GO:0032991]; smooth endoplasmic reticulum [GO:0005790]	538000	537000	586000	582000	1070000	1170000	787000	746000	20	20	0.750282	0.0591004	FALSE	42794	0.340566	0.234712	FALSE	non significant	0.50549
158	296	P23528	CFL1	ENSG00000172757:CFL1	Cofilin-1 OS=Homo sapiens OX=9606 GN=CFL1 PE=1 SV=3	cell-cell junction [GO:0005911]; cortical actin cytoskeleton [GO:0030864]; cytoplasm [GO:0005737]; cytosol [GO:0005829]; extracellular exosome [GO:0070062]; extracellular space [GO:0005615]; focal adhesion [GO:0005925]; lamellipodium [GO:0030027]; lamellipodium membrane [GO:0031258]; membrane [GO:0016020]; nuclear matrix [GO:0016363]; nucleus [GO:0005634]; ruffle membrane [GO:0032587]; vesicle [G…	840000	805000	1400000	1580000	772000	539000	746000	758000	28	19	-0.716318	0.142335	FALSE	62591.6	-0.275111	0.474977	FALSE	non significant	0.443922
331	240	P62140	PPP1CB	ENSG00000213639:PPP1CB	Serine/threonine-protein phosphatase PP1-beta catalytic subunit OS=Homo sapiens OX=9606 GN=PPP1CB PE=1 SV=3	PTW/PP1 phosphatase complex [GO:0072357]; cytoplasm [GO:0005737]; cytosol [GO:0005829]; extracellular exosome [GO:0070062]; focal adhesion [GO:0005925]; glycogen granule [GO:0042587]; nucleolus [GO:0005730]; nucleoplasm [GO:0005654]; nucleus [GO:0005634]; plasma membrane [GO:0005886]; protein phosphatase type 1 complex [GO:0000164]	62900	68400	66000	63900	55000	51400	58000	51100	20	7	-0.277467	0.0209394	FALSE	17676	-0.349469	0.0680889	FALSE	non significant	0.311394
199	416	Q15293	RCN1	ENSG00000049449:RCN1	Reticulocalbin-1 OS=Homo sapiens OX=9606 GN=RCN1 PE=1 SV=1	endoplasmic reticulum [GO:0005783]; endoplasmic reticulum lumen [GO:0005788]	634000	635000	753000	592000	1150000	945000	664000	566000	20	20	0.347095	0.407642	FALSE	28958.1	-0.354164	0.170824	FALSE	non significant	0.350612
310	540	P24844	MYL9	ENSG00000101335:MYL9	Myosin regulatory light polypeptide 9 OS=Homo sapiens OX=9606 GN=MYL9 PE=1 SV=4	Z disc [GO:0030018]; cytosol [GO:0005829]; muscle myosin complex [GO:0005859]; stress fiber [GO:0001725]	68900	85700	83800	92500	61300	51000	49800	54300	15	4	-0.612695	0.0183423	FALSE	22122	-2.84365	2.22545e-08	TRUE	significant by RNA only	1.31996
166	191	Q96CW1	AP2M1	ENSG00000161203:AP2M1	AP-2 complex subunit mu OS=Homo sapiens OX=9606 GN=AP2M1 PE=1 SV=2	AP-2 adaptor complex [GO:0030122]; clathrin-coated endocytic vesicle [GO:0045334]; clathrin-coated endocytic vesicle membrane [GO:0030669]; cytosol [GO:0005829]; endocytic vesicle membrane [GO:0030666]; endolysosome membrane [GO:0036020]; extracellular exosome [GO:0070062]; lysosomal membrane [GO:0005765]; plasma membrane [GO:0005886]	1100000	1130000	956000	1120000	654000	578000	542000	577000	30	30	-0.873074	0.0029079	FALSE	29810.9	-0.575817	0.0115588	FALSE	non significant	0.709035
292	196	P50995	ANXA11	ENSG00000122359:ANXA11	Annexin A11 OS=Homo sapiens OX=9606 GN=ANXA11 PE=1 SV=1	azurophil granule [GO:0042582]; collagen-containing extracellular matrix [GO:0062023]; cytoplasm [GO:0005737]; cytosol [GO:0005829]; extracellular exosome [GO:0070062]; melanosome [GO:0042470]; membrane [GO:0016020]; midbody [GO:0030496]; nuclear envelope [GO:0005635]; nucleoplasm [GO:0005654]; phagocytic vesicle [GO:0045335]; specific granule [GO:0042581]; spindle [GO:0005819]	285000	558000	511000	554000	278000	253000	327000	323000	21	17	-0.692052	0.131559	FALSE	10617.6	0.239524	0.53708	FALSE	non significant	0.40714
269	151	Q9UHD8	2019-09-09	ENSG00000184640:SEPT9	Septin-9 OS=Homo sapiens OX=9606 GN=SEPT9 PE=1 SV=2	actin cytoskeleton [GO:0015629]; axoneme [GO:0005930]; cytoplasm [GO:0005737]; microtubule [GO:0005874]; microtubule cytoskeleton [GO:0015630]; non-motile cilium [GO:0097730]; perinuclear region of cytoplasm [GO:0048471]; septin complex [GO:0031105]; septin ring [GO:0005940]; stress fiber [GO:0001725]	385000	380000	383000	337000	254000	262000	328000	340000	18	15	-0.326794	0.105454	FALSE	19123.6	0.0711793	0.823526	FALSE	non significant	0.152515
227	198	Q96AG4	LRRC59	ENSG00000108829:LRRC59	Leucine-rich repeat-containing protein 59 OS=Homo sapiens OX=9606 GN=LRRC59 PE=1 SV=1	cytoplasm [GO:0005737]; endoplasmic reticulum [GO:0005783]; endoplasmic reticulum membrane [GO:0005789]; integral component of membrane [GO:0016021]; membrane [GO:0016020]; mitochondrial nucleoid [GO:0042645]; nuclear envelope [GO:0005635]	509000	559000	564000	595000	778000	735000	719000	617000	30	30	0.355354	0.0381444	FALSE	18769.5	-0.44055	0.0360054	FALSE	non significant	0.395665
297	262	P21964	COMT	ENSG00000093010:COMT	Catechol O-methyltransferase OS=Homo sapiens OX=9606 GN=COMT PE=1 SV=2	axon [GO:0030424]; cell body [GO:0044297]; cytosol [GO:0005829]; dendrite [GO:0030425]; dendritic spine [GO:0043197]; extracellular exosome [GO:0070062]; integral component of membrane [GO:0016021]; intracellular membrane-bounded organelle [GO:0043231]; membrane [GO:0016020]; plasma membrane [GO:0005886]; postsynaptic membrane [GO:0045211]	368000	383000	377000	365000	529000	509000	397000	369000	26	26	0.272985	0.235137	FALSE	11218.1	-0.825378	6.16506e-05	FALSE	non significant	0.474675
40	248	P07858	CTSB	ENSG00000164733:CTSB	Cathepsin B OS=Homo sapiens OX=9606 GN=CTSB PE=1 SV=3	collagen-containing extracellular matrix [GO:0062023]; endolysosome lumen [GO:0036021]; extracellular exosome [GO:0070062]; extracellular region [GO:0005576]; extracellular space [GO:0005615]; ficolin-1-rich granule lumen [GO:1904813]; intracellular [GO:0005622]; intracellular membrane-bounded organelle [GO:0043231]; lysosome [GO:0005764]; melanosome [GO:0042470]; nucleolus [GO:0005730]; perinucl…	1310000	1410000	1310000	1330000	6320000	6050000	4620000	4420000	63	63	1.99798	0.00961516	TRUE	69628.9	1.21629	1.57521e-06	TRUE	significantly consistently upregulated	1.55889
286	201	P04062	GBA	ENSG00000177628:GBA	Glucosylceramidase OS=Homo sapiens OX=9606 GN=GBA PE=1 SV=3	Golgi apparatus [GO:0005794]; endoplasmic reticulum [GO:0005783]; extracellular exosome [GO:0070062]; extrinsic component of membrane [GO:0019898]; lysosomal lumen [GO:0043202]; lysosomal membrane [GO:0005765]; lysosome [GO:0005764]; trans-Golgi network [GO:0005802]	300000	336000	319000	316000	285000	351000	520000	538000	28	28	0.41447	0.30176	FALSE	9623.68	0.0360765	0.934487	FALSE	non significant	0.122281
298	293	O75390	CS	ENSG00000062485:CS	Citrate synthase mitochondrial OS=Homo sapiens OX=9606 GN=CS PE=1 SV=2	extracellular exosome [GO:0070062]; mitochondrial matrix [GO:0005759]; mitochondrion [GO:0005739]; nucleus [GO:0005634]	270000	304000	366000	356000	166000	191000	301000	251000	19	19	-0.511714	0.131031	FALSE	8003.25	0.0748888	0.89548	FALSE	non significant	0.195759
503	208	Q14573	ITPR3	ENSG00000096433:ITPR3	Inositol 1 4 5-trisphosphate receptor type 3 OS=Homo sapiens OX=9606 GN=ITPR3 PE=1 SV=2	apical part of cell [GO:0045177]; brush border [GO:0005903]; cytoplasm [GO:0005737]; cytoplasmic vesicle membrane [GO:0030659]; endoplasmic reticulum [GO:0005783]; endoplasmic reticulum membrane [GO:0005789]; integral component of plasma membrane [GO:0005887]; membrane [GO:0016020]; myelin sheath [GO:0043209]; neuronal cell body [GO:0043025]; nuclear outer membrane [GO:0005640]; nucleolus [GO:000…	65800	73800	71100	65200	151000	140000	127000	100000	19	16	0.908807	0.0249992	FALSE	12843.3	1.38504	1.45986e-08	TRUE	significant by RNA only	1.12193
139	224	Q05639	EEF1A2	ENSG00000101210:EEF1A2	Elongation factor 1-alpha 2 OS=Homo sapiens OX=9606 GN=EEF1A2 PE=1 SV=1	cytoplasm [GO:0005737]; cytoplasmic side of lysosomal membrane [GO:0098574]; eukaryotic translation elongation factor 1 complex [GO:0005853]; neuronal cell body [GO:0043025]; synapse [GO:0045202]	49900	50300	53800	55300	33800	32900	32900	31500	33	6	-0.674905	0.00229584	FALSE	3383.43	-2.56924	1.58358e-18	TRUE	significant by RNA only	1.31681
304	170	P63010	AP2B1	ENSG00000006125:AP2B1	AP-2 complex subunit beta OS=Homo sapiens OX=9606 GN=AP2B1 PE=1 SV=1	AP-2 adaptor complex [GO:0030122]; clathrin-coated endocytic vesicle [GO:0045334]; clathrin-coated endocytic vesicle membrane [GO:0030669]; cytosol [GO:0005829]; endocytic vesicle membrane [GO:0030666]; endolysosome membrane [GO:0036020]; glutamatergic synapse [GO:0098978]; membrane [GO:0016020]; plasma membrane [GO:0005886]; postsynapse [GO:0098794]; presynapse [GO:0098793]	292000	296000	333000	324000	141000	166000	159000	161000	19	11	-0.989608	0.00224908	FALSE	16556.2	0.174952	0.613606	FALSE	non significant	0.416094
504	238	P22695	UQCRC2	ENSG00000140740:UQCRC2	Cytochrome b-c1 complex subunit 2 mitochondrial OS=Homo sapiens OX=9606 GN=UQCRC2 PE=1 SV=3	mitochondrial inner membrane [GO:0005743]; mitochondrial processing peptidase complex [GO:0017087]; mitochondrial respiratory chain complex III [GO:0005750]; mitochondrial respiratory chain complex IV [GO:0005751]; mitochondrion [GO:0005739]; nucleoplasm [GO:0005654]	133000	146000	135000	141000	136000	134000	184000	184000	17	17	0.201069	0.353813	FALSE	8623.66	-0.406285	0.000122655	FALSE	non significant	0.285817
356	161	Q9NVA2	2019-09-11	ENSG00000138758:SEPT11	Septin-11 OS=Homo sapiens OX=9606 GN=SEPT11 PE=1 SV=3	GABA-ergic synapse [GO:0098982]; axon [GO:0030424]; cell junction [GO:0030054]; dendritic spine [GO:0043197]; glutamatergic synapse [GO:0098978]; microtubule cytoskeleton [GO:0015630]; postsynaptic specialization of symmetric synapse [GO:0099629]; septin complex [GO:0031105]; septin ring [GO:0005940]; stress fiber [GO:0001725]	106000	111000	118000	113000	109000	114000	105000	104000	18	9	-0.0524674	0.385973	FALSE	29528.7	-0.39903	0.0869885	FALSE	non significant	0.144693
339	175	Q07157	TJP1	ENSG00000104067:TJP1	Tight junction protein ZO-1 OS=Homo sapiens OX=9606 GN=TJP1 PE=1 SV=3	apical junction complex [GO:0043296]; apical part of cell [GO:0045177]; basolateral plasma membrane [GO:0016323]; bicellular tight junction [GO:0005923]; cell junction [GO:0030054]; cell projection [GO:0042995]; cell-cell adherens junction [GO:0005913]; cytoplasm [GO:0005737]; cytosol [GO:0005829]; gap junction [GO:0005921]; plasma membrane [GO:0005886]; podosome [GO:0002102]	227000	265000	215000	235000	244000	186000	145000	163000	20	20	-0.352106	0.181866	FALSE	14842.1	-1.0073	7.27977e-05	TRUE	significant by RNA only	0.595547
348	501	P27635	RPL10	ENSG00000147403:RPL10	60S ribosomal protein L10 OS=Homo sapiens OX=9606 GN=RPL10 PE=1 SV=4	cytosol [GO:0005829]; cytosolic large ribosomal subunit [GO:0022625]; endoplasmic reticulum [GO:0005783]; membrane [GO:0016020]; nucleus [GO:0005634]; protein-containing complex [GO:0032991]	700000	672000	680000	625000	820000	765000	674000	580000	15	15	0.0847657	0.655666	FALSE	40499.6	0.368415	0.271201	FALSE	non significant	0.176717
250	109	O00469	PLOD2	ENSG00000152952:PLOD2	Procollagen-lysine 2-oxoglutarate 5-dioxygenase 2 OS=Homo sapiens OX=9606 GN=PLOD2 PE=1 SV=2	endoplasmic reticulum [GO:0005783]; endoplasmic reticulum membrane [GO:0005789]; extracellular exosome [GO:0070062]; rough endoplasmic reticulum membrane [GO:0030867]	299000	319000	485000	346000	464000	480000	448000	389000	21	21	0.29763	0.222015	FALSE	57636.5	-0.876568	0.0337571	FALSE	non significant	0.510777
306	141	O94973	AP2A2	ENSG00000183020:AP2A2	AP-2 complex subunit alpha-2 OS=Homo sapiens OX=9606 GN=AP2A2 PE=1 SV=2	AP-2 adaptor complex [GO:0030122]; clathrin-coated endocytic vesicle [GO:0045334]; clathrin-coated endocytic vesicle membrane [GO:0030669]; cytoplasmic vesicle [GO:0031410]; cytosol [GO:0005829]; endocytic vesicle membrane [GO:0030666]; endolysosome membrane [GO:0036020]; ficolin-1-rich granule membrane [GO:0101003]; plasma membrane [GO:0005886]; secretory granule membrane [GO:0030667]	118000	120000	110000	117000	72700	88200	91100	93700	27	10	-0.42771	0.0406407	FALSE	4863.48	-0.326546	0.0638106	FALSE	non significant	0.37372
313	137	Q12884	FAP	ENSG00000078098:FAP	Prolyl endopeptidase FAP OS=Homo sapiens OX=9606 GN=FAP PE=1 SV=5	apical part of cell [GO:0045177]; basal part of cell [GO:0045178]; cell surface [GO:0009986]; cytoplasm [GO:0005737]; extracellular space [GO:0005615]; focal adhesion [GO:0005925]; integral component of membrane [GO:0016021]; invadopodium membrane [GO:0071438]; lamellipodium [GO:0030027]; lamellipodium membrane [GO:0031258]; plasma membrane [GO:0005886]; ruffle membrane [GO:0032587]	190000	256000	255000	264000	203000	226000	640000	684000	18	18	0.861225	0.366691	FALSE	14394.8	1.84459	1.92992e-07	TRUE	significant by RNA only	1.2604
132	204	P50993	ATP1A2	ENSG00000018625:ATP1A2	Sodium/potassium-transporting ATPase subunit alpha-2 OS=Homo sapiens OX=9606 GN=ATP1A2 PE=1 SV=1	T-tubule [GO:0030315]; caveola [GO:0005901]; cytoplasm [GO:0005737]; dendritic spine [GO:0043197]; endosome [GO:0005768]; extracellular vesicle [GO:1903561]; intercalated disc [GO:0014704]; membrane [GO:0016020]; plasma membrane [GO:0005886]; sodium:potassium-exchanging ATPase complex [GO:0005890]	4990	5280	2940	3330	4370	6930	4530	6410	25	2	0.427198	0.251736	FALSE	47.0446	-2.89768	1.72386e-05	FALSE	non significant	1.1126
459	265	P38606	ATP6V1A	ENSG00000114573:ATP6V1A	V-type proton ATPase catalytic subunit A OS=Homo sapiens OX=9606 GN=ATP6V1A PE=1 SV=2	apical plasma membrane [GO:0016324]; cytosol [GO:0005829]; extracellular exosome [GO:0070062]; lysosomal membrane [GO:0005765]; microvillus [GO:0005902]; plasma membrane [GO:0005886]; proton-transporting V-type ATPase, V1 domain [GO:0033180]; proton-transporting two-sector ATPase complex [GO:0016469]; vacuolar membrane [GO:0005774]	150000	138000	134000	142000	156000	181000	150000	157000	15	15	0.191366	0.100017	FALSE	11637.5	-0.56937	0.0697848	FALSE	non significant	0.330088
446	155	Q5M775	SPECC1	ENSG00000128487:SPECC1	Cytospin-B OS=Homo sapiens OX=9606 GN=SPECC1 PE=1 SV=1	filamentous actin [GO:0031941]; membrane [GO:0016020]; microtubule organizing center [GO:0005815]; nucleus [GO:0005634]	258000	253000	217000	234000	187000	171000	157000	169000	24	23	-0.492041	0.012039	FALSE	9011.34	-1.62046	7.11769e-07	TRUE	significant by RNA only	0.892934
309	138	Q9BTT6	LRRC1	ENSG00000137269:LRRC1	Leucine-rich repeat-containing protein 1 OS=Homo sapiens OX=9606 GN=LRRC1 PE=1 SV=1	cytosol [GO:0005829]; membrane [GO:0016020]	180000	191000	143000	161000	179000	140000	128000	148000	22	16	-0.181998	0.333834	FALSE	2312.42	-0.868386	1.36271e-05	FALSE	non significant	0.397548
2394	2446	Q9NYL4	FKBP11	ENSG00000134285:FKBP11	Peptidyl-prolyl cis-trans isomerase FKBP11 OS=Homo sapiens OX=9606 GN=FKBP11 PE=1 SV=1	integral component of membrane [GO:0016021]; membrane [GO:0016020]	4680	6920	7160	6870	17100	16700	21400	23300	1	1	1.61486	0.00526154	TRUE	1058.25	1.3798	1.59879e-05	TRUE	significantly consistently upregulated	1.49271
197	295	P63104	YWHAZ	ENSG00000164924:YWHAZ	14-3-3 protein zeta/delta OS=Homo sapiens OX=9606 GN=YWHAZ PE=1 SV=1	blood microparticle [GO:0072562]; cytoplasm [GO:0005737]; cytosol [GO:0005829]; extracellular exosome [GO:0070062]; extracellular space [GO:0005615]; focal adhesion [GO:0005925]; glutamatergic synapse [GO:0098978]; hippocampal mossy fiber to CA3 synapse [GO:0098686]; melanosome [GO:0042470]; mitochondrion [GO:0005739]; nucleoplasm [GO:0005654]; nucleus [GO:0005634]; vesicle [GO:0031982]	404000	391000	493000	474000	290000	347000	314000	297000	23	13	-0.497596	0.02496	FALSE	45801.8	-0.242143	0.419943	FALSE	non significant	0.347116
362	190	Q96AC1	FERMT2	ENSG00000073712:FERMT2	Fermitin family homolog 2 OS=Homo sapiens OX=9606 GN=FERMT2 PE=1 SV=1	I band [GO:0031674]; cell cortex [GO:0005938]; cell surface [GO:0009986]; cytoplasm [GO:0005737]; cytosol [GO:0005829]; extrinsic component of cytoplasmic side of plasma membrane [GO:0031234]; focal adhesion [GO:0005925]; lamellipodium membrane [GO:0031258]; nucleoplasm [GO:0005654]; nucleus [GO:0005634]; stress fiber [GO:0001725]	254000	274000	282000	277000	189000	218000	205000	219000	19	19	-0.387432	0.0137628	FALSE	24319.3	-1.51504	4.18978e-06	TRUE	significant by RNA only	0.766143
283	589	P62277	RPS13	ENSG00000110700:RPS13	40S ribosomal protein S13 OS=Homo sapiens OX=9606 GN=RPS13 PE=1 SV=2	cytosol [GO:0005829]; cytosolic small ribosomal subunit [GO:0022627]; extracellular exosome [GO:0070062]; focal adhesion [GO:0005925]; membrane [GO:0016020]; nucleolus [GO:0005730]; nucleoplasm [GO:0005654]; nucleus [GO:0005634]; postsynaptic density [GO:0014069]; ribosome [GO:0005840]	601000	604000	664000	666000	638000	479000	566000	514000	20	20	-0.206451	0.176058	FALSE	19223	0.404065	0.349104	FALSE	non significant	0.288825
287	389	P18124	RPL7	ENSG00000147604:RPL7	60S ribosomal protein L7 OS=Homo sapiens OX=9606 GN=RPL7 PE=1 SV=1	cytoplasm [GO:0005737]; cytosol [GO:0005829]; cytosolic large ribosomal subunit [GO:0022625]; focal adhesion [GO:0005925]; membrane [GO:0016020]; nucleolus [GO:0005730]; nucleus [GO:0005634]; postsynaptic density [GO:0014069]; ribonucleoprotein complex [GO:1990904]	616000	600000	645000	579000	737000	645000	691000	554000	23	23	0.106535	0.460874	FALSE	44252.8	0.264815	0.584031	FALSE	non significant	0.167965
142	361	P10321	HLA-C	ENSG00000204525:HLA-C	HLA class I histocompatibility antigen Cw-7 alpha chain OS=Homo sapiens OX=9606 GN=HLA-C PE=1 SV=3	ER to Golgi transport vesicle membrane [GO:0012507]; Golgi apparatus [GO:0005794]; Golgi membrane [GO:0000139]; MHC class I protein complex [GO:0042612]; cell surface [GO:0009986]; early endosome membrane [GO:0031901]; endoplasmic reticulum [GO:0005783]; extracellular exosome [GO:0070062]; integral component of lumenal side of endoplasmic reticulum membrane [GO:0071556]; phagocytic vesicle membra…	2580	3260	2650	3050	3240	2030	2060	1850	22	1	-0.330077	0.235642	FALSE	32486.6	-0.69815	0.0842212	FALSE	non significant	0.480045
463	439	P08758	ANXA5	ENSG00000164111:ANXA5	Annexin A5 OS=Homo sapiens OX=9606 GN=ANXA5 PE=1 SV=2	collagen-containing extracellular matrix [GO:0062023]; cytoplasm [GO:0005737]; cytosol [GO:0005829]; endothelial microparticle [GO:0072563]; external side of plasma membrane [GO:0009897]; extracellular exosome [GO:0070062]; extracellular region [GO:0005576]; focal adhesion [GO:0005925]; intracellular [GO:0005622]; membrane [GO:0016020]	221000	275000	192000	220000	146000	164000	209000	186000	15	14	-0.365069	0.122538	FALSE	63114.1	-0.722825	0.000163342	FALSE	non significant	0.513694
111	630	P35613	BSG	ENSG00000172270:BSG	Basigin OS=Homo sapiens OX=9606 GN=BSG PE=1 SV=2	Golgi membrane [GO:0000139]; acrosomal membrane [GO:0002080]; axon [GO:0030424]; extracellular exosome [GO:0070062]; focal adhesion [GO:0005925]; integral component of plasma membrane [GO:0005887]; intracellular membrane-bounded organelle [GO:0043231]; melanosome [GO:0042470]; membrane [GO:0016020]; membrane raft [GO:0045121]; mitochondrion [GO:0005739]; plasma membrane [GO:0005886]; sarcolemma […	1670000	1950000	1480000	1570000	706000	745000	853000	1080000	19	19	-0.978957	0.016576	FALSE	24109.6	0.507348	0.0648015	FALSE	non significant	0.704749
431	180	Q03001	DST	ENSG00000151914:DST	Dystonin OS=Homo sapiens OX=9606 GN=DST PE=1 SV=4	H zone [GO:0031673]; Z disc [GO:0030018]; actin cytoskeleton [GO:0015629]; axon [GO:0030424]; axon cytoplasm [GO:1904115]; basal plasma membrane [GO:0009925]; basement membrane [GO:0005604]; cell cortex [GO:0005938]; cell leading edge [GO:0031252]; cytoplasm [GO:0005737]; cytoplasmic vesicle [GO:0031410]; cytosol [GO:0005829]; endoplasmic reticulum membrane [GO:0005789]; focal adhesion [GO:000592…	282000	325000	356000	345000	214000	214000	272000	315000	38	34	-0.365883	0.134036	FALSE	78203.8	0.579071	0.0250052	FALSE	non significant	0.460296
489	110	O75083	WDR1	ENSG00000071127:WDR1	WD repeat-containing protein 1 OS=Homo sapiens OX=9606 GN=WDR1 PE=1 SV=4	actomyosin, actin portion [GO:0042643]; cell junction [GO:0030054]; cell projection [GO:0042995]; cell-cell junction [GO:0005911]; cortical actin cytoskeleton [GO:0030864]; cytosol [GO:0005829]; extracellular exosome [GO:0070062]; extracellular region [GO:0005576]; plasma membrane [GO:0005886]; podosome [GO:0002102]	243000	231000	346000	355000	171000	177000	194000	196000	15	15	-0.670968	0.0705251	FALSE	39292.8	-0.905411	6.91202e-09	FALSE	non significant	0.779424
486	718	Q96D15	RCN3	ENSG00000142552:RCN3	Reticulocalbin-3 OS=Homo sapiens OX=9606 GN=RCN3 PE=1 SV=1	endoplasmic reticulum [GO:0005783]; endoplasmic reticulum lumen [GO:0005788]	107000	118000	128000	114000	728000	520000	407000	282000	11	11	2.05233	0.0309888	TRUE	9403.27	1.05516	7.67671e-05	TRUE	significantly consistently upregulated	1.47158
429	434	P18621	RPL17	ENSG00000265681:RPL17	60S ribosomal protein L17 OS=Homo sapiens OX=9606 GN=RPL17 PE=1 SV=3	cytosol [GO:0005829]; cytosolic large ribosomal subunit [GO:0022625]; nucleus [GO:0005634]	235000	223000	259000	229000	341000	311000	308000	252000	15	14	0.357478	0.0676423	FALSE	31468.7	0.425791	0.273693	FALSE	non significant	0.390142
198	304	P39023	RPL3	ENSG00000100316:RPL3	60S ribosomal protein L3 OS=Homo sapiens OX=9606 GN=RPL3 PE=1 SV=2	cytoplasm [GO:0005737]; cytosol [GO:0005829]; cytosolic large ribosomal subunit [GO:0022625]; extracellular exosome [GO:0070062]; focal adhesion [GO:0005925]; nucleolus [GO:0005730]; nucleus [GO:0005634]; protein-containing complex [GO:0032991]; synapse [GO:0045202]	926000	916000	966000	1050000	2280000	1140000	1320000	837000	24	24	0.531636	0.351083	FALSE	62875.8	0.44722	0.169953	FALSE	non significant	0.487605
288	379	P19022	CDH2	ENSG00000170558:CDH2	Cadherin-2 OS=Homo sapiens OX=9606 GN=CDH2 PE=1 SV=4	apical part of cell [GO:0045177]; apical plasma membrane [GO:0016324]; basolateral plasma membrane [GO:0016323]; catenin complex [GO:0016342]; cell junction [GO:0030054]; cell surface [GO:0009986]; cell-cell adherens junction [GO:0005913]; cell-cell junction [GO:0005911]; collagen-containing extracellular matrix [GO:0062023]; cytoplasm [GO:0005737]; endoplasmic reticulum lumen [GO:0005788]; fasci…	348000	342000	322000	311000	239000	245000	208000	198000	16	16	-0.571936	0.016576	FALSE	13125.4	-1.05033	0.00342641	TRUE	significant by RNA only	0.775062
273	780	P01116	KRAS	ENSG00000133703:KRAS	GTPase KRas OS=Homo sapiens OX=9606 GN=KRAS PE=1 SV=1	cytoplasm [GO:0005737]; cytosol [GO:0005829]; extrinsic component of cytoplasmic side of plasma membrane [GO:0031234]; focal adhesion [GO:0005925]; membrane [GO:0016020]; membrane raft [GO:0045121]; mitochondrion [GO:0005739]; plasma membrane [GO:0005886]	20000	20700	20500	15900	81900	70700	36100	24000	15	2	1.46402	0.110253	FALSE	5386.22	-0.450322	0.0498324	FALSE	non significant	0.81196
232	221	P0DMV8	HSPA1A	ENSG00000204389:HSPA1A	Heat shock 70 kDa protein 1A OS=Homo sapiens OX=9606 GN=HSPA1A PE=1 SV=1	aggresome [GO:0016235]; blood microparticle [GO:0072562]; centriole [GO:0005814]; centrosome [GO:0005813]; cytoplasm [GO:0005737]; cytosol [GO:0005829]; endoplasmic reticulum [GO:0005783]; extracellular exosome [GO:0070062]; extracellular region [GO:0005576]; ficolin-1-rich granule lumen [GO:1904813]; focal adhesion [GO:0005925]; inclusion body [GO:0016234]; mitochondrion [GO:0005739]; nuclear sp…	70000	63100	60000	65900	108000	109000	58000	61800	24	6	0.37894	0.399503	FALSE	4426.47	-0.372177	0.00142534	FALSE	non significant	0.375543
232	221	P0DMV8	HSPA1B	ENSG00000204388:HSPA1B	Heat shock 70 kDa protein 1A OS=Homo sapiens OX=9606 GN=HSPA1A PE=1 SV=1	aggresome [GO:0016235]; blood microparticle [GO:0072562]; centriole [GO:0005814]; centrosome [GO:0005813]; cytoplasm [GO:0005737]; cytosol [GO:0005829]; endoplasmic reticulum [GO:0005783]; extracellular exosome [GO:0070062]; extracellular region [GO:0005576]; ficolin-1-rich granule lumen [GO:1904813]; focal adhesion [GO:0005925]; inclusion body [GO:0016234]; mitochondrion [GO:0005739]; nuclear sp…	70000	63100	60000	65900	108000	109000	58000	61800	24	6	0.37894	0.399503	FALSE	3639.06	0.237861	0.437638	FALSE	non significant	0.300225
232	222	P0DMV9	HSPA1A	ENSG00000204389:HSPA1A	Heat shock 70 kDa protein 1B OS=Homo sapiens OX=9606 GN=HSPA1B PE=1 SV=1	aggresome [GO:0016235]; blood microparticle [GO:0072562]; centriole [GO:0005814]; centrosome [GO:0005813]; cytoplasm [GO:0005737]; cytosol [GO:0005829]; endoplasmic reticulum [GO:0005783]; extracellular exosome [GO:0070062]; extracellular region [GO:0005576]; ficolin-1-rich granule lumen [GO:1904813]; focal adhesion [GO:0005925]; inclusion body [GO:0016234]; mitochondrion [GO:0005739]; nuclear sp…	70000	63100	60000	65900	108000	109000	58000	61800	24	6	0.37894	0.399503	FALSE	4426.47	-0.372177	0.00142534	FALSE	non significant	0.375543
232	222	P0DMV9	HSPA1B	ENSG00000204388:HSPA1B	Heat shock 70 kDa protein 1B OS=Homo sapiens OX=9606 GN=HSPA1B PE=1 SV=1	aggresome [GO:0016235]; blood microparticle [GO:0072562]; centriole [GO:0005814]; centrosome [GO:0005813]; cytoplasm [GO:0005737]; cytosol [GO:0005829]; endoplasmic reticulum [GO:0005783]; extracellular exosome [GO:0070062]; extracellular region [GO:0005576]; ficolin-1-rich granule lumen [GO:1904813]; focal adhesion [GO:0005925]; inclusion body [GO:0016234]; mitochondrion [GO:0005739]; nuclear sp…	70000	63100	60000	65900	108000	109000	58000	61800	24	6	0.37894	0.399503	FALSE	3639.06	0.237861	0.437638	FALSE	non significant	0.300225
315	550	P61604	HSPE1	ENSG00000115541:HSPE1	10 kDa heat shock protein mitochondrial OS=Homo sapiens OX=9606 GN=HSPE1 PE=1 SV=2	extracellular exosome [GO:0070062]; membrane [GO:0016020]; mitochondrial matrix [GO:0005759]; mitochondrion [GO:0005739]	360000	455000	572000	555000	323000	339000	612000	716000	21	21	0.0352252	0.955252	FALSE	4500.26	-0.150479	0.784365	FALSE	non significant	0.0728056
102	281	P20340	RAB6A	ENSG00000175582:RAB6A	Ras-related protein Rab-6A OS=Homo sapiens OX=9606 GN=RAB6A PE=1 SV=3	Golgi apparatus [GO:0005794]; Golgi membrane [GO:0000139]; cytoplasmic vesicle [GO:0031410]; cytosol [GO:0005829]; endoplasmic reticulum membrane [GO:0005789]; endosome to plasma membrane transport vesicle [GO:0070381]; extracellular exosome [GO:0070062]; membrane [GO:0016020]; plasma membrane [GO:0005886]; secretory granule membrane [GO:0030667]; trans-Golgi network [GO:0005802]; trans-Golgi net…	245000	277000	226000	215000	732000	731000	250000	240000	25	8	1.02008	0.269198	FALSE	8249.69	-0.675751	0.0027444	FALSE	non significant	0.830255
265	232	P19367	HK1	ENSG00000156515:HK1	Hexokinase-1 OS=Homo sapiens OX=9606 GN=HK1 PE=1 SV=3	cytosol [GO:0005829]; membrane raft [GO:0045121]; mitochondrial outer membrane [GO:0005741]; mitochondrion [GO:0005739]	420000	490000	418000	423000	516000	592000	561000	598000	28	28	0.372605	0.0192982	FALSE	20511.9	0.0500406	0.877749	FALSE	non significant	0.136548
344	324	Q92544	TM9SF4	ENSG00000101337:TM9SF4	Transmembrane 9 superfamily member 4 OS=Homo sapiens OX=9606 GN=TM9SF4 PE=1 SV=2	Golgi apparatus [GO:0005794]; early endosome [GO:0005769]; integral component of membrane [GO:0016021]; membrane [GO:0016020]	274000	312000	270000	256000	384000	402000	325000	350000	18	18	0.393799	0.0306952	FALSE	6130.45	-0.115355	0.835771	FALSE	non significant	0.213136
150	370	Q7Z406	MYH14	ENSG00000105357:MYH14	Myosin-14 OS=Homo sapiens OX=9606 GN=MYH14 PE=1 SV=2	actomyosin [GO:0042641]; brush border [GO:0005903]; cytosol [GO:0005829]; extracellular exosome [GO:0070062]; growth cone [GO:0030426]; membrane [GO:0016020]; myosin II complex [GO:0016460]; myosin II filament [GO:0097513]; stress fiber [GO:0001725]	20300	24900	18200	19400	16900	19600	18400	18700	31	5	-0.169925	0.306021	FALSE	403.484	-1.1962	0.0432878	TRUE	significant by RNA only	0.450848
371	154	Q9Y4F1	FARP1	ENSG00000152767:FARP1	FERM ARHGEF and pleckstrin domain-containing protein 1 OS=Homo sapiens OX=9606 GN=FARP1 PE=1 SV=1	cell junction [GO:0030054]; cytoskeleton [GO:0005856]; cytosol [GO:0005829]; dendrite [GO:0030425]; dendritic spine [GO:0043197]; extrinsic component of cytoplasmic side of plasma membrane [GO:0031234]; filopodium [GO:0030175]	285000	307000	253000	241000	275000	254000	232000	250000	20	19	-0.103241	0.449468	FALSE	7653.6	-1.66765	4.00847e-05	TRUE	significant by RNA only	0.414933
192	454	Q9Y3B3	TMED7	ENSG00000134970:TMED7	Transmembrane emp24 domain-containing protein 7 OS=Homo sapiens OX=9606 GN=TMED7 PE=1 SV=2	COPI vesicle coat [GO:0030126]; COPII vesicle coat [GO:0030127]; COPII-coated ER to Golgi transport vesicle [GO:0030134]; Golgi apparatus [GO:0005794]; Golgi membrane [GO:0000139]; endoplasmic reticulum [GO:0005783]; endoplasmic reticulum membrane [GO:0005789]; endoplasmic reticulum-Golgi intermediate compartment [GO:0005793]; endoplasmic reticulum-Golgi intermediate compartment membrane [GO:0033…	553000	536000	544000	572000	940000	963000	708000	707000	22	21	0.589535	0.0581155	FALSE	19154.6	-0.562747	0.00391275	FALSE	non significant	0.575986
192	454	Q9Y3B3	TMED7-TICAM2	ENSG00000251201:TMED7-TICAM2	Transmembrane emp24 domain-containing protein 7 OS=Homo sapiens OX=9606 GN=TMED7 PE=1 SV=2	COPI vesicle coat [GO:0030126]; COPII vesicle coat [GO:0030127]; COPII-coated ER to Golgi transport vesicle [GO:0030134]; Golgi apparatus [GO:0005794]; Golgi membrane [GO:0000139]; endoplasmic reticulum [GO:0005783]; endoplasmic reticulum membrane [GO:0005789]; endoplasmic reticulum-Golgi intermediate compartment [GO:0005793]; endoplasmic reticulum-Golgi intermediate compartment membrane [GO:0033…	553000	536000	544000	572000	940000	963000	708000	707000	22	21	0.589535	0.0581155	FALSE	6466.37	-0.571306	0.00203011	FALSE	non significant	0.580349
249	274	P36578	RPL4	ENSG00000174444:RPL4	60S ribosomal protein L4 OS=Homo sapiens OX=9606 GN=RPL4 PE=1 SV=5	cytoplasm [GO:0005737]; cytosol [GO:0005829]; cytosolic large ribosomal subunit [GO:0022625]; extracellular exosome [GO:0070062]; focal adhesion [GO:0005925]; membrane [GO:0016020]; nucleolus [GO:0005730]; nucleus [GO:0005634]; ribonucleoprotein complex [GO:1990904]; rough endoplasmic reticulum [GO:0005791]	654000	716000	692000	678000	772000	673000	647000	604000	30	30	-0.0233554	0.811194	FALSE	85151.8	0.462335	0.194535	FALSE	non significant	0.103913
377	526	O94766	B3GAT3	ENSG00000149541:B3GAT3	Galactosylgalactosylxylosylprotein 3-beta-glucuronosyltransferase 3 OS=Homo sapiens OX=9606 GN=B3GAT3 PE=1 SV=2	Golgi apparatus [GO:0005794]; Golgi membrane [GO:0000139]; cis-Golgi network [GO:0005801]; extracellular exosome [GO:0070062]; integral component of membrane [GO:0016021]; membrane [GO:0016020]	222000	199000	139000	157000	185000	183000	134000	144000	11	11	-0.150439	0.59847	FALSE	4549.91	0.44662	0.0395074	FALSE	non significant	0.259208
386	356	Q92508	PIEZO1	ENSG00000103335:PIEZO1	Piezo-type mechanosensitive ion channel component 1 OS=Homo sapiens OX=9606 GN=PIEZO1 PE=1 SV=4	endoplasmic reticulum [GO:0005783]; endoplasmic reticulum membrane [GO:0005789]; endoplasmic reticulum-Golgi intermediate compartment membrane [GO:0033116]; integral component of membrane [GO:0016021]; lamellipodium membrane [GO:0031258]; plasma membrane [GO:0005886]	108000	117000	84100	85600	84200	87100	72900	73200	12	12	-0.314454	0.158714	FALSE	30226.6	-0.345877	0.354765	FALSE	non significant	0.329792
296	231	P06865	HEXA	ENSG00000213614:HEXA	Beta-hexosaminidase subunit alpha OS=Homo sapiens OX=9606 GN=HEXA PE=1 SV=2	azurophil granule [GO:0042582]; extracellular exosome [GO:0070062]; lysosomal lumen [GO:0043202]; membrane [GO:0016020]	337000	364000	344000	337000	360000	474000	698000	746000	23	21	0.72101	0.150058	FALSE	13401.5	0.224799	0.609013	FALSE	non significant	0.402594
148	371	P63000	RAC1	ENSG00000136238:RAC1	Ras-related C3 botulinum toxin substrate 1 OS=Homo sapiens OX=9606 GN=RAC1 PE=1 SV=1	Golgi membrane [GO:0000139]; cell projection [GO:0042995]; cytoplasm [GO:0005737]; cytoplasmic ribonucleoprotein granule [GO:0036464]; cytoplasmic vesicle [GO:0031410]; cytosol [GO:0005829]; dendritic spine [GO:0043197]; endoplasmic reticulum membrane [GO:0005789]; extracellular exosome [GO:0070062]; ficolin-1-rich granule membrane [GO:0101003]; focal adhesion [GO:0005925]; glutamatergic synapse …	601000	738000	603000	612000	486000	491000	345000	348000	29	14	-0.61291	0.0515478	FALSE	12549.8	-0.133259	0.816927	FALSE	non significant	0.28579
299	556	P07951	TPM2	ENSG00000198467:TPM2	Tropomyosin beta chain OS=Homo sapiens OX=9606 GN=TPM2 PE=1 SV=1	actin cytoskeleton [GO:0015629]; actin filament [GO:0005884]; cytosol [GO:0005829]; muscle thin filament tropomyosin [GO:0005862]	21200	18000	17400	22400	14200	13300	6590	10600	19	1	-0.821901	0.0871382	FALSE	38822.1	-1.0515	2.98834e-08	TRUE	significant by RNA only	0.929638
478	174	Q13136	PPFIA1	ENSG00000131626:PPFIA1	Liprin-alpha-1 OS=Homo sapiens OX=9606 GN=PPFIA1 PE=1 SV=1	cytoplasm [GO:0005737]; cytosol [GO:0005829]; focal adhesion [GO:0005925]; presynaptic active zone [GO:0048786]	189000	187000	160000	166000	122000	120000	111000	105000	20	18	-0.616123	0.00704731	FALSE	6916.14	-0.98181	2.19572e-05	FALSE	non significant	0.777763
358	590	P09493	TPM1	ENSG00000140416:TPM1	Tropomyosin alpha-1 chain OS=Homo sapiens OX=9606 GN=TPM1 PE=1 SV=2	actin cytoskeleton [GO:0015629]; actin filament [GO:0005884]; bleb [GO:0032059]; cytoskeleton [GO:0005856]; cytosol [GO:0005829]; muscle thin filament tropomyosin [GO:0005862]; ruffle membrane [GO:0032587]; sarcomere [GO:0030017]; stress fiber [GO:0001725]	63600	61200	69000	81600	30800	32500	28700	47000	20	4	-0.986444	0.0221882	FALSE	34692	-1.77352	1.22995e-09	TRUE	significant by RNA only	1.32268
409	171	Q00341	HDLBP	ENSG00000115677:HDLBP	Vigilin OS=Homo sapiens OX=9606 GN=HDLBP PE=1 SV=2	cytosol [GO:0005829]; high-density lipoprotein particle [GO:0034364]; nucleus [GO:0005634]; plasma membrane [GO:0005886]	149000	157000	166000	142000	256000	270000	210000	248000	20	18	0.68042	0.012039	FALSE	57876.2	-0.18991	0.218462	FALSE	non significant	0.35947
301	280	O00161	SNAP23	ENSG00000092531:SNAP23	Synaptosomal-associated protein 23 OS=Homo sapiens OX=9606 GN=SNAP23 PE=1 SV=1	SNARE complex [GO:0031201]; azurophil granule [GO:0042582]; cell-cell adherens junction [GO:0005913]; cytoplasm [GO:0005737]; extracellular exosome [GO:0070062]; focal adhesion [GO:0005925]; mast cell granule [GO:0042629]; neuron projection [GO:0043005]; nucleoplasm [GO:0005654]; phagocytic vesicle membrane [GO:0030670]; plasma membrane [GO:0005886]; presynapse [GO:0098793]; specific granule [GO:…	418000	393000	303000	316000	209000	225000	162000	187000	17	17	-0.868931	0.0154168	FALSE	5104.58	-0.94004	4.18539e-06	FALSE	non significant	0.903787
271	507	Q9BY67	CADM1	ENSG00000182985:CADM1	Cell adhesion molecule 1 OS=Homo sapiens OX=9606 GN=CADM1 PE=1 SV=2	basolateral plasma membrane [GO:0016323]; cell-cell junction [GO:0005911]; integral component of membrane [GO:0016021]; plasma membrane [GO:0005886]; synapse [GO:0045202]	338000	375000	365000	355000	158000	158000	137000	126000	17	17	-1.3074	0.00472599	TRUE	4183.87	-1.64991	0.0081464	TRUE	significantly consistently downregulated	1.4687
433	408	O15118	NPC1	ENSG00000141458:NPC1	NPC intracellular cholesterol transporter 1 OS=Homo sapiens OX=9606 GN=NPC1 PE=1 SV=2	Golgi apparatus [GO:0005794]; endoplasmic reticulum [GO:0005783]; extracellular exosome [GO:0070062]; extracellular region [GO:0005576]; integral component of lysosomal membrane [GO:1905103]; integral component of membrane [GO:0016021]; integral component of plasma membrane [GO:0005887]; late endosome membrane [GO:0031902]; lysosomal membrane [GO:0005765]; lysosome [GO:0005764]; membrane [GO:0016…	143000	155000	157000	163000	195000	211000	415000	432000	18	17	1.01971	0.122222	FALSE	28352.1	1.46947	4.51831e-06	TRUE	significant by RNA only	1.2241
427	369	Q03518	TAP1	ENSG00000168394:TAP1	Antigen peptide transporter 1 OS=Homo sapiens OX=9606 GN=TAP1 PE=1 SV=2	MHC class I peptide loading complex [GO:0042824]; TAP complex [GO:0042825]; endoplasmic reticulum [GO:0005783]; endoplasmic reticulum membrane [GO:0005789]; endoplasmic reticulum-Golgi intermediate compartment membrane [GO:0033116]; integral component of endoplasmic reticulum membrane [GO:0030176]; integral component of membrane [GO:0016021]; membrane [GO:0016020]; microtubule organizing center […	123000	136000	134000	132000	113000	103000	96100	86100	11	11	-0.398824	0.0437245	FALSE	6701.46	-0.0964051	0.693908	FALSE	non significant	0.196083
289	531	P06753	TPM3	ENSG00000143549:TPM3	Tropomyosin alpha-3 chain OS=Homo sapiens OX=9606 GN=TPM3 PE=1 SV=2	actin cytoskeleton [GO:0015629]; actin filament [GO:0005884]; cytoskeleton [GO:0005856]; cytosol [GO:0005829]; extracellular exosome [GO:0070062]; muscle thin filament tropomyosin [GO:0005862]; stress fiber [GO:0001725]	44900	48300	54400	63500	40100	42300	34200	40800	21	5	-0.423491	0.0676856	FALSE	33019.8	-0.128197	0.763029	FALSE	non significant	0.233003
207	239	P61247	RPS3A	ENSG00000145425:RPS3A	40S ribosomal protein S3a OS=Homo sapiens OX=9606 GN=RPS3A PE=1 SV=2	cytoplasm [GO:0005737]; cytosol [GO:0005829]; cytosolic small ribosomal subunit [GO:0022627]; endoplasmic reticulum [GO:0005783]; extracellular exosome [GO:0070062]; focal adhesion [GO:0005925]; nucleolus [GO:0005730]; nucleoplasm [GO:0005654]; nucleus [GO:0005634]; ribonucleoprotein complex [GO:1990904]	1170000	1020000	1300000	1220000	1160000	847000	1020000	787000	23	23	-0.304422	0.166859	FALSE	43577.1	0.316023	0.496294	FALSE	non significant	0.310169
321	400	P62906	RPL10A	ENSG00000198755:RPL10A	60S ribosomal protein L10a OS=Homo sapiens OX=9606 GN=RPL10A PE=1 SV=2	cytosol [GO:0005829]; cytosolic large ribosomal subunit [GO:0022625]; extracellular exosome [GO:0070062]; focal adhesion [GO:0005925]; membrane [GO:0016020]; nucleus [GO:0005634]; polysomal ribosome [GO:0042788]; postsynaptic density [GO:0014069]	458000	459000	506000	473000	536000	472000	509000	407000	17	17	0.0211498	0.92038	FALSE	33366.3	0.398326	0.283404	FALSE	non significant	0.0917852
245	497	P10301	RRAS	ENSG00000126458:RRAS	Ras-related protein R-Ras OS=Homo sapiens OX=9606 GN=RRAS PE=1 SV=1	extracellular exosome [GO:0070062]; focal adhesion [GO:0005925]; plasma membrane [GO:0005886]	205000	212000	156000	166000	170000	171000	146000	154000	16	12	-0.20525	0.280386	FALSE	1201.16	0.343613	0.478896	FALSE	non significant	0.265569
278	320	P31946	YWHAB	ENSG00000166913:YWHAB	14-3-3 protein beta/alpha OS=Homo sapiens OX=9606 GN=YWHAB PE=1 SV=3	cytoplasm [GO:0005737]; cytosol [GO:0005829]; extracellular exosome [GO:0070062]; focal adhesion [GO:0005925]; melanosome [GO:0042470]; membrane [GO:0016020]; mitochondrion [GO:0005739]; nucleus [GO:0005634]; perinuclear region of cytoplasm [GO:0048471]; transcriptional repressor complex [GO:0017053]; vacuolar membrane [GO:0005774]	114000	131000	112000	119000	164000	127000	123000	119000	18	6	0.163174	0.359597	FALSE	19119.7	-0.286152	0.181248	FALSE	non significant	0.216085
411	212	Q99798	ACO2	ENSG00000100412:ACO2	Aconitate hydratase mitochondrial OS=Homo sapiens OX=9606 GN=ACO2 PE=1 SV=2	cytosol [GO:0005829]; mitochondrial matrix [GO:0005759]; mitochondrion [GO:0005739]	163000	179000	229000	230000	198000	154000	190000	177000	15	15	-0.15581	0.480321	FALSE	8430.71	-0.289738	0.0237708	FALSE	non significant	0.212471
266	451	P20339	RAB5A	ENSG00000144566:RAB5A	Ras-related protein Rab-5A OS=Homo sapiens OX=9606 GN=RAB5A PE=1 SV=2	actin cytoskeleton [GO:0015629]; anchored component of synaptic vesicle membrane [GO:0098993]; axon [GO:0030424]; axon terminus [GO:0043679]; clathrin-coated vesicle membrane [GO:0030665]; cytoplasm [GO:0005737]; cytoplasmic side of early endosome membrane [GO:0098559]; cytosol [GO:0005829]; dendrite [GO:0030425]; early endosome [GO:0005769]; early endosome membrane [GO:0031901]; early phagosome …	82600	92400	73800	68300	88600	79200	71200	79900	18	8	0.00816622	0.940831	FALSE	5546.62	-0.450108	0.078075	FALSE	non significant	0.0606274
393	298	P55084	HADHB	ENSG00000138029:HADHB	Trifunctional enzyme subunit beta mitochondrial OS=Homo sapiens OX=9606 GN=HADHB PE=1 SV=3	endoplasmic reticulum [GO:0005783]; mitochondrial envelope [GO:0005740]; mitochondrial inner membrane [GO:0005743]; mitochondrial nucleoid [GO:0042645]; mitochondrial outer membrane [GO:0005741]; mitochondrion [GO:0005739]	266000	315000	373000	360000	416000	298000	398000	353000	21	21	0.156935	0.455723	FALSE	7884.55	-0.0297205	0.900029	FALSE	non significant	0.0682949
282	505	Q9Y3L5	RAP2C	ENSG00000123728:RAP2C	Ras-related protein Rap-2c OS=Homo sapiens OX=9606 GN=RAP2C PE=1 SV=1	bicellular tight junction [GO:0005923]; cell-cell contact zone [GO:0044291]; cytoplasm [GO:0005737]; cytosol [GO:0005829]; extracellular exosome [GO:0070062]; plasma membrane [GO:0005886]; recycling endosome membrane [GO:0055038]; tertiary granule membrane [GO:0070821]	50700	45600	35400	34900	33600	36300	25700	32600	16	3	-0.377992	0.153441	FALSE	2818.57	-0.213722	0.409989	FALSE	non significant	0.284228
349	267	P09543	CNP	ENSG00000173786:CNP	2' 3'-cyclic-nucleotide 3'-phosphodiesterase OS=Homo sapiens OX=9606 GN=CNP PE=1 SV=2	cytoplasm [GO:0005737]; cytosol [GO:0005829]; extracellular exosome [GO:0070062]; extracellular space [GO:0005615]; melanosome [GO:0042470]; membrane [GO:0016020]; microtubule [GO:0005874]; microvillus [GO:0005902]; mitochondrial inner membrane [GO:0005743]; mitochondrial outer membrane [GO:0005741]; myelin sheath abaxonal region [GO:0035748]; myelin sheath adaxonal region [GO:0035749]; nucleopla…	322000	352000	287000	314000	299000	306000	307000	364000	19	18	0.00113108	0.996993	FALSE	8446.13	0.0785051	0.766057	FALSE	non significant	0.00942315
204	322	Q8WUD1	RAB2B	ENSG00000129472:RAB2B	Ras-related protein Rab-2B OS=Homo sapiens OX=9606 GN=RAB2B PE=1 SV=1	Golgi membrane [GO:0000139]; endoplasmic reticulum membrane [GO:0005789]; extracellular exosome [GO:0070062]; plasma membrane [GO:0005886]; presynapse [GO:0098793]	15500	18800	12700	15700	19300	12100	15500	17900	26	3	0.0475284	0.892532	FALSE	2038.58	-0.129953	0.539429	FALSE	non significant	0.0785904
434	188	O00192	ARVCF	ENSG00000099889:ARVCF	Armadillo repeat protein deleted in velo-cardio-facial syndrome OS=Homo sapiens OX=9606 GN=ARVCF PE=1 SV=1	cell-cell adherens junction [GO:0005913]; cell-cell junction [GO:0005911]; cytoplasm [GO:0005737]; intracellular [GO:0005622]; nucleus [GO:0005634]; plasma membrane [GO:0005886]	160000	170000	124000	125000	106000	110000	104000	99100	19	19	-0.466269	0.0763793	FALSE	2610.71	-0.747106	0.0115588	FALSE	non significant	0.590214
179	345	P15880	RPS2	ENSG00000140988:RPS2	40S ribosomal protein S2 OS=Homo sapiens OX=9606 GN=RPS2 PE=1 SV=2	cytosol [GO:0005829]; cytosolic small ribosomal subunit [GO:0022627]; extracellular exosome [GO:0070062]; focal adhesion [GO:0005925]; membrane [GO:0016020]; nucleoplasm [GO:0005654]; nucleus [GO:0005634]	769000	850000	890000	858000	959000	781000	774000	664000	26	26	-0.0833446	0.57131	FALSE	53510	0.572	0.150984	FALSE	non significant	0.218342
454	382	P16278	GLB1	ENSG00000170266:GLB1	Beta-galactosidase OS=Homo sapiens OX=9606 GN=GLB1 PE=1 SV=2	Golgi apparatus [GO:0005794]; azurophil granule lumen [GO:0035578]; cytoplasm [GO:0005737]; extracellular exosome [GO:0070062]; extracellular region [GO:0005576]; ficolin-1-rich granule lumen [GO:1904813]; intracellular membrane-bounded organelle [GO:0043231]; lysosomal lumen [GO:0043202]; perinuclear region of cytoplasm [GO:0048471]; vacuole [GO:0005773]	149000	147000	149000	145000	285000	314000	223000	227000	15	15	0.830228	0.033568	FALSE	8633.73	-0.431858	0.345438	FALSE	non significant	0.598783
252	264	P62701	RPS4X	ENSG00000198034:RPS4X	40S ribosomal protein S4 X isoform OS=Homo sapiens OX=9606 GN=RPS4X PE=1 SV=2	cytoplasmic ribonucleoprotein granule [GO:0036464]; cytosol [GO:0005829]; cytosolic small ribosomal subunit [GO:0022627]; extracellular exosome [GO:0070062]; focal adhesion [GO:0005925]; membrane [GO:0016020]; nucleoplasm [GO:0005654]; polysome [GO:0005844]; ribonucleoprotein complex [GO:1990904]; ribosome [GO:0005840]; small ribosomal subunit [GO:0015935]; synapse [GO:0045202]	535000	496000	544000	495000	378000	324000	324000	289000	25	16	-0.654568	0.0153746	FALSE	36403.7	0.538584	0.143364	FALSE	non significant	0.593751
364	275	P39656	DDOST	ENSG00000244038:DDOST	Dolichyl-diphosphooligosaccharide--protein glycosyltransferase 48 kDa subunit OS=Homo sapiens OX=9606 GN=DDOST PE=1 SV=4	azurophil granule membrane [GO:0035577]; endoplasmic reticulum [GO:0005783]; endoplasmic reticulum membrane [GO:0005789]; integral component of membrane [GO:0016021]; intracellular membrane-bounded organelle [GO:0043231]; membrane [GO:0016020]; oligosaccharyltransferase complex [GO:0008250]; plasma membrane [GO:0005886]; protein-containing complex [GO:0032991]	363000	457000	354000	361000	262000	272000	326000	378000	17	17	-0.310227	0.162769	FALSE	35482.1	0.430982	0.0302297	FALSE	non significant	0.365654
413	307	O75131	CPNE3	ENSG00000085719:CPNE3	Copine-3 OS=Homo sapiens OX=9606 GN=CPNE3 PE=1 SV=1	azurophil granule membrane [GO:0035577]; cell junction [GO:0030054]; cytoplasm [GO:0005737]; cytosol [GO:0005829]; extracellular exosome [GO:0070062]; focal adhesion [GO:0005925]; mitochondrion [GO:0005739]; nucleolus [GO:0005730]; nucleus [GO:0005634]; plasma membrane [GO:0005886]	138000	210000	295000	280000	128000	134000	250000	282000	16	15	-0.217192	0.646118	FALSE	9720.69	0.0395033	0.876222	FALSE	non significant	0.0926272
410	202	Q9UHN6	TMEM2	ENSG00000135048:TMEM2	Cell surface hyaluronidase OS=Homo sapiens OX=9606 GN=TMEM2 PE=1 SV=1	extracellular exosome [GO:0070062]; integral component of membrane [GO:0016021]; integral component of plasma membrane [GO:0005887]	212000	228000	197000	194000	133000	132000	98600	98400	19	18	-0.846956	0.0210818	FALSE	16617.9	-2.27078	1.32787e-07	TRUE	significant by RNA only	1.38681
307	189	Q14126	DSG2	ENSG00000046604:DSG2	Desmoglein-2 OS=Homo sapiens OX=9606 GN=DSG2 PE=1 SV=2	apical plasma membrane [GO:0016324]; cell junction [GO:0030054]; cell surface [GO:0009986]; cell-cell junction [GO:0005911]; cornified envelope [GO:0001533]; desmosome [GO:0030057]; extracellular exosome [GO:0070062]; integral component of membrane [GO:0016021]; intercalated disc [GO:0014704]; intracellular membrane-bounded organelle [GO:0043231]; lateral plasma membrane [GO:0016328]; plasma memb…	266000	248000	225000	226000	219000	221000	183000	193000	18	18	-0.24196	0.0889469	FALSE	9242.46	-1.25749	0.026869	TRUE	significant by RNA only	0.551599
392	258	Q8NC51	SERBP1	ENSG00000142864:SERBP1	Plasminogen activator inhibitor 1 RNA-binding protein OS=Homo sapiens OX=9606 GN=SERBP1 PE=1 SV=2	cytoplasm [GO:0005737]; cytosol [GO:0005829]; extracellular exosome [GO:0070062]; membrane [GO:0016020]; nucleus [GO:0005634]; perinuclear region of cytoplasm [GO:0048471]; plasma membrane [GO:0005886]	199000	159000	171000	177000	257000	190000	216000	185000	17	17	0.264396	0.184455	FALSE	30333.1	0.10739	0.781578	FALSE	non significant	0.168504
391	270	Q9HD20	ATP13A1	ENSG00000105726:ATP13A1	Manganese-transporting ATPase 13A1 OS=Homo sapiens OX=9606 GN=ATP13A1 PE=1 SV=2	endoplasmic reticulum membrane [GO:0005789]; integral component of membrane [GO:0016021]; membrane [GO:0016020]	213000	259000	197000	212000	315000	286000	255000	249000	20	20	0.326832	0.0800925	FALSE	6198.15	0.698359	0.00333404	FALSE	non significant	0.477751
460	309	P31930	UQCRC1	ENSG00000010256:UQCRC1	Cytochrome b-c1 complex subunit 1 mitochondrial OS=Homo sapiens OX=9606 GN=UQCRC1 PE=1 SV=3	cytosol [GO:0005829]; mitochondrial inner membrane [GO:0005743]; mitochondrial respirasome [GO:0005746]; mitochondrial respiratory chain complex III [GO:0005750]; mitochondrion [GO:0005739]	101000	122000	114000	116000	134000	145000	180000	182000	18	17	0.500813	0.0504614	FALSE	9091.72	-0.318132	0.167868	FALSE	non significant	0.399155
367	159	Q15942	ZYX	ENSG00000159840:ZYX	Zyxin OS=Homo sapiens OX=9606 GN=ZYX PE=1 SV=1	cell-cell adherens junction [GO:0005913]; cytoplasm [GO:0005737]; cytosol [GO:0005829]; focal adhesion [GO:0005925]; nucleus [GO:0005634]; phagocytic vesicle [GO:0045335]; stress fiber [GO:0001725]	158000	159000	167000	160000	123000	142000	124000	118000	14	14	-0.345075	0.0328818	FALSE	13001.7	-0.181464	0.823441	FALSE	non significant	0.250237
560	165	Q15262	PTPRK	ENSG00000152894:PTPRK	Receptor-type tyrosine-protein phosphatase kappa OS=Homo sapiens OX=9606 GN=PTPRK PE=1 SV=2	adherens junction [GO:0005912]; axon [GO:0030424]; cell junction [GO:0030054]; cell surface [GO:0009986]; cell-cell junction [GO:0005911]; dendrite [GO:0030425]; integral component of membrane [GO:0016021]; integral component of plasma membrane [GO:0005887]; intracellular membrane-bounded organelle [GO:0043231]; leading edge membrane [GO:0031256]; neuronal cell body [GO:0043025]; photoreceptor ou…	113000	119000	104000	109000	96700	85800	78500	75800	15	15	-0.401913	0.035567	FALSE	19242.8	0.780759	0.0108415	FALSE	non significant	0.560176
338	268	P54289	CACNA2D1	ENSG00000153956:CACNA2D1	Voltage-dependent calcium channel subunit alpha-2/delta-1 OS=Homo sapiens OX=9606 GN=CACNA2D1 PE=1 SV=3	L-type voltage-gated calcium channel complex [GO:1990454]; extracellular exosome [GO:0070062]; plasma membrane [GO:0005886]; sarcoplasmic reticulum [GO:0016529]; voltage-gated calcium channel complex [GO:0005891]	404000	371000	353000	320000	304000	305000	243000	234000	20	20	-0.415037	0.0587045	FALSE	3774.78	-1.03265	0.0155635	TRUE	significant by RNA only	0.654668
426	303	Q9NZN4	EHD2	ENSG00000024422:EHD2	EH domain-containing protein 2 OS=Homo sapiens OX=9606 GN=EHD2 PE=1 SV=2	caveola [GO:0005901]; cytosol [GO:0005829]; endosome membrane [GO:0010008]; extracellular exosome [GO:0070062]; extrinsic component of membrane [GO:0019898]; intercellular bridge [GO:0045171]; microtubule cytoskeleton [GO:0015630]; nucleus [GO:0005634]; perinuclear region of cytoplasm [GO:0048471]; plasma membrane [GO:0005886]; recycling endosome membrane [GO:0055038]	551000	491000	519000	584000	467000	305000	425000	359000	16	14	-0.463136	0.0830495	FALSE	5989.22	-0.518705	0.201051	FALSE	non significant	0.490134
417	424	P30044	PRDX5	ENSG00000126432:PRDX5	Peroxiredoxin-5 mitochondrial OS=Homo sapiens OX=9606 GN=PRDX5 PE=1 SV=4	cytoplasm [GO:0005737]; cytoplasmic vesicle [GO:0031410]; cytosol [GO:0005829]; extracellular exosome [GO:0070062]; extracellular space [GO:0005615]; intracellular membrane-bounded organelle [GO:0043231]; mitochondrial matrix [GO:0005759]; mitochondrion [GO:0005739]; nucleus [GO:0005634]; perinuclear region of cytoplasm [GO:0048471]; peroxisomal matrix [GO:0005782]; peroxisome [GO:0005777]	154000	191000	220000	195000	193000	212000	216000	172000	16	16	0.0613214	0.716322	FALSE	14474.1	-0.12217	0.786492	FALSE	non significant	0.0865541
458	229	P55011	SLC12A2	ENSG00000064651:SLC12A2	Solute carrier family 12 member 2 OS=Homo sapiens OX=9606 GN=SLC12A2 PE=1 SV=1	apical plasma membrane [GO:0016324]; extracellular exosome [GO:0070062]; extracellular vesicle [GO:1903561]; integral component of plasma membrane [GO:0005887]; membrane [GO:0016020]; plasma membrane [GO:0005886]	180000	154000	153000	137000	132000	141000	135000	141000	16	16	-0.18474	0.199005	FALSE	8434.9	-0.390094	0.213615	FALSE	non significant	0.268451
445	249	P34897	SHMT2	ENSG00000182199:SHMT2	Serine hydroxymethyltransferase mitochondrial OS=Homo sapiens OX=9606 GN=SHMT2 PE=1 SV=3	BRISC complex [GO:0070552]; cytoplasm [GO:0005737]; extracellular exosome [GO:0070062]; microtubule cytoskeleton [GO:0015630]; mitochondrial inner membrane [GO:0005743]; mitochondrial intermembrane space [GO:0005758]; mitochondrial matrix [GO:0005759]; mitochondrial nucleoid [GO:0042645]; mitochondrion [GO:0005739]; nucleus [GO:0005634]	190000	218000	329000	285000	178000	176000	259000	217000	16	16	-0.300212	0.357397	FALSE	11855	-0.66309	0.0329405	FALSE	non significant	0.44617
400	216	Q14315	FLNC	ENSG00000128591:FLNC	Filamin-C OS=Homo sapiens OX=9606 GN=FLNC PE=1 SV=3	Z disc [GO:0030018]; costamere [GO:0043034]; cytoplasm [GO:0005737]; cytoskeleton [GO:0005856]; cytosol [GO:0005829]; focal adhesion [GO:0005925]; plasma membrane [GO:0005886]; sarcolemma [GO:0042383]; sarcoplasm [GO:0016528]	172000	183000	229000	272000	130000	132000	122000	190000	27	15	-0.57656	0.08768	FALSE	21502.2	-2.77117	3.31371e-05	TRUE	significant by RNA only	1.26402
323	597	P84098	RPL19	ENSG00000108298:RPL19	60S ribosomal protein L19 OS=Homo sapiens OX=9606 GN=RPL19 PE=1 SV=1	cytosol [GO:0005829]; cytosolic large ribosomal subunit [GO:0022625]; focal adhesion [GO:0005925]; membrane [GO:0016020]; polysomal ribosome [GO:0042788]; synapse [GO:0045202]	431000	481000	386000	464000	267000	236000	241000	229000	16	15	-0.856702	0.00454459	FALSE	50623	0.424955	0.272527	FALSE	non significant	0.603374
319	425	Q9P0L0	VAPA	ENSG00000101558:VAPA	Vesicle-associated membrane protein-associated protein A OS=Homo sapiens OX=9606 GN=VAPA PE=1 SV=3	Golgi membrane [GO:0000139]; azurophil granule membrane [GO:0035577]; bicellular tight junction [GO:0005923]; endoplasmic reticulum [GO:0005783]; endoplasmic reticulum membrane [GO:0005789]; integral component of membrane [GO:0016021]; microtubule cytoskeleton [GO:0015630]; nuclear membrane [GO:0031965]; plasma membrane [GO:0005886]; vesicle [GO:0031982]	354000	363000	427000	439000	383000	382000	381000	334000	15	13	-0.0970641	0.471297	FALSE	8009.84	-0.388594	0.189869	FALSE	non significant	0.194213
385	255	P51659	HSD17B4	ENSG00000133835:HSD17B4	Peroxisomal multifunctional enzyme type 2 OS=Homo sapiens OX=9606 GN=HSD17B4 PE=1 SV=3	cytosol [GO:0005829]; membrane [GO:0016020]; peroxisomal matrix [GO:0005782]; peroxisomal membrane [GO:0005778]; peroxisome [GO:0005777]	131000	183000	165000	158000	173000	145000	148000	125000	16	16	-0.108135	0.570643	FALSE	8926.62	-0.236347	0.270741	FALSE	non significant	0.159867
476	156	Q460N5	PARP14	ENSG00000173193:PARP14	Poly [ADP-ribose] polymerase 14 OS=Homo sapiens OX=9606 GN=PARP14 PE=1 SV=3	cytoplasm [GO:0005737]; cytosol [GO:0005829]; membrane [GO:0016020]; nucleus [GO:0005634]	203000	211000	235000	235000	128000	147000	146000	127000	18	18	-0.68987	0.00472599	FALSE	11701.8	0.709932	0.00169495	FALSE	non significant	0.699829
1251	1064	Q96IZ0	PAWR	ENSG00000177425:PAWR	PRKC apoptosis WT1 regulator protein OS=Homo sapiens OX=9606 GN=PAWR PE=1 SV=1	actin filament [GO:0005884]; cytoplasm [GO:0005737]; nuclear chromatin [GO:0000790]; nucleus [GO:0005634]	17800	14700	22700	23000	7790	5340	5540	5880	3	3	-1.67145	0.00616373	TRUE	9295.15	-1.16045	1.05022e-07	TRUE	significantly consistently downregulated	1.3927
692	729	P15151	PVR	ENSG00000073008:PVR	Poliovirus receptor OS=Homo sapiens OX=9606 GN=PVR PE=1 SV=2	cell surface [GO:0009986]; cell-cell adherens junction [GO:0005913]; cytoplasm [GO:0005737]; extracellular space [GO:0005615]; focal adhesion [GO:0005925]; integral component of membrane [GO:0016021]; plasma membrane [GO:0005886]	192000	252000	272000	244000	77300	78900	83700	91800	7	7	-1.53316	0.00454459	TRUE	21651	-1.24549	0.00130181	TRUE	significantly consistently downregulated	1.38186
488	228	Q14204	DYNC1H1	ENSG00000197102:DYNC1H1	Cytoplasmic dynein 1 heavy chain 1 OS=Homo sapiens OX=9606 GN=DYNC1H1 PE=1 SV=5	axon cytoplasm [GO:1904115]; azurophil granule lumen [GO:0035578]; cell cortex [GO:0005938]; centrosome [GO:0005813]; cytoplasmic dynein complex [GO:0005868]; cytoplasmic microtubule [GO:0005881]; cytosol [GO:0005829]; dynein complex [GO:0030286]; extracellular exosome [GO:0070062]; extracellular region [GO:0005576]; filopodium [GO:0030175]; membrane [GO:0016020]; microtubule [GO:0005874]	201000	218000	185000	187000	263000	284000	220000	239000	27	27	0.346881	0.0543255	FALSE	69017.2	-0.0747395	0.858482	FALSE	non significant	0.161015
181	442	P62241	RPS8	ENSG00000142937:RPS8	40S ribosomal protein S8 OS=Homo sapiens OX=9606 GN=RPS8 PE=1 SV=2	cytosol [GO:0005829]; cytosolic small ribosomal subunit [GO:0022627]; endoplasmic reticulum [GO:0005783]; extracellular exosome [GO:0070062]; focal adhesion [GO:0005925]; membrane [GO:0016020]; nucleoplasm [GO:0005654]; nucleus [GO:0005634]; ribonucleoprotein complex [GO:1990904]	707000	715000	863000	785000	909000	810000	834000	708000	21	21	0.0870758	0.528887	FALSE	41084	0.359694	0.359437	FALSE	non significant	0.176976
403	317	P21796	VDAC1	ENSG00000213585:VDAC1	Voltage-dependent anion-selective channel protein 1 OS=Homo sapiens OX=9606 GN=VDAC1 PE=1 SV=2	extracellular exosome [GO:0070062]; membrane [GO:0016020]; membrane raft [GO:0045121]; mitochondrial nucleoid [GO:0042645]; mitochondrial outer membrane [GO:0005741]; mitochondrial permeability transition pore complex [GO:0005757]; mitochondrion [GO:0005739]; nucleus [GO:0005634]; plasma membrane [GO:0005886]; pore complex [GO:0046930]; synaptic vesicle [GO:0008021]	190000	209000	200000	206000	295000	311000	255000	249000	20	19	0.463499	0.0321377	FALSE	13380.7	-0.12747	0.706434	FALSE	non significant	0.243068
389	312	Q99439	CNN2	ENSG00000064666:CNN2	Calponin-2 OS=Homo sapiens OX=9606 GN=CNN2 PE=1 SV=4	cell-cell junction [GO:0005911]; cytoskeleton [GO:0005856]; extracellular region [GO:0005576]; focal adhesion [GO:0005925]; membrane [GO:0016020]; specific granule lumen [GO:0035580]; stress fiber [GO:0001725]; tertiary granule lumen [GO:1904724]	245000	322000	470000	462000	185000	190000	171000	154000	13	10	-1.09857	0.0528032	FALSE	28800.9	-0.869182	0.000901558	FALSE	non significant	0.97717
361	571	P62753	RPS6	ENSG00000137154:RPS6	40S ribosomal protein S6 OS=Homo sapiens OX=9606 GN=RPS6 PE=1 SV=1	cell body [GO:0044297]; cytoplasmic ribonucleoprotein granule [GO:0036464]; cytosol [GO:0005829]; cytosolic small ribosomal subunit [GO:0022627]; dendrite [GO:0030425]; endoplasmic reticulum [GO:0005783]; membrane [GO:0016020]; nucleolus [GO:0005730]; nucleoplasm [GO:0005654]; nucleus [GO:0005634]; perinuclear region of cytoplasm [GO:0048471]; polysome [GO:0005844]; ribonucleoprotein complex [GO:…	493000	445000	491000	459000	532000	379000	425000	360000	17	17	-0.154723	0.377601	FALSE	58200.3	0.455998	0.275034	FALSE	non significant	0.265619
395	381	P62258	YWHAE	ENSG00000108953:YWHAE	14-3-3 protein epsilon OS=Homo sapiens OX=9606 GN=YWHAE PE=1 SV=1	central region of growth cone [GO:0090724]; cytoplasm [GO:0005737]; cytosol [GO:0005829]; extracellular exosome [GO:0070062]; focal adhesion [GO:0005925]; glutamatergic synapse [GO:0098978]; kinesin complex [GO:0005871]; melanosome [GO:0042470]; membrane [GO:0016020]; mitochondrion [GO:0005739]; nucleus [GO:0005634]	235000	237000	275000	283000	193000	269000	201000	212000	14	11	-0.235289	0.202864	FALSE	20767.5	-0.175805	0.612712	FALSE	non significant	0.203384
341	561	P30050	RPL12	ENSG00000197958:RPL12	60S ribosomal protein L12 OS=Homo sapiens OX=9606 GN=RPL12 PE=1 SV=1	cytosol [GO:0005829]; cytosolic large ribosomal subunit [GO:0022625]; extracellular exosome [GO:0070062]; focal adhesion [GO:0005925]; large ribosomal subunit [GO:0015934]; membrane [GO:0016020]; nucleolus [GO:0005730]; postsynaptic density [GO:0014069]	365000	300000	301000	330000	342000	343000	429000	340000	12	12	0.165962	0.276321	FALSE	33385.9	0.705082	0.134542	FALSE	non significant	0.342077
424	223	P98194	ATP2C1	ENSG00000017260:ATP2C1	Calcium-transporting ATPase type 2C member 1 OS=Homo sapiens OX=9606 GN=ATP2C1 PE=1 SV=3	Golgi apparatus [GO:0005794]; Golgi membrane [GO:0000139]; integral component of membrane [GO:0016021]; membrane [GO:0016020]; trans-Golgi network [GO:0005802]	115000	134000	118000	127000	258000	199000	171000	173000	18	18	0.697291	0.0441898	FALSE	9570.83	-0.478894	0.0437337	FALSE	non significant	0.577865
497	353	Q8N3R9	MPP5	ENSG00000072415:MPP5	MAGUK p55 subfamily member 5 OS=Homo sapiens OX=9606 GN=MPP5 PE=1 SV=3	Golgi apparatus [GO:0005794]; Schmidt-Lanterman incisure [GO:0043220]; apical plasma membrane [GO:0016324]; axon [GO:0030424]; bicellular tight junction [GO:0005923]; cell-cell adherens junction [GO:0005913]; cytoplasm [GO:0005737]; endoplasmic reticulum-Golgi intermediate compartment [GO:0005793]; extracellular exosome [GO:0070062]; lateral loop [GO:0043219]; myelin sheath adaxonal region [GO:00…	209000	218000	163000	178000	135000	146000	120000	134000	13	13	-0.521567	0.0336225	FALSE	7481.99	-1.24218	2.2615e-06	TRUE	significant by RNA only	0.804911
467	246	P00558	PGK1	ENSG00000102144:PGK1	Phosphoglycerate kinase 1 OS=Homo sapiens OX=9606 GN=PGK1 PE=1 SV=3	cytosol [GO:0005829]; extracellular exosome [GO:0070062]; extracellular space [GO:0005615]; membrane [GO:0016020]; membrane raft [GO:0045121]	215000	238000	300000	368000	139000	140000	152000	170000	16	16	-0.899349	0.0415804	FALSE	34050.8	-0.520878	0.000894258	FALSE	non significant	0.684435
351	358	P00367	GLUD1	ENSG00000148672:GLUD1	Glutamate dehydrogenase 1 mitochondrial OS=Homo sapiens OX=9606 GN=GLUD1 PE=1 SV=2	cytoplasm [GO:0005737]; mitochondrial matrix [GO:0005759]; mitochondrion [GO:0005739]	317000	299000	417000	351000	325000	254000	512000	391000	12	12	0.0987015	0.862458	FALSE	11508.4	0.396396	0.0794567	FALSE	non significant	0.1978
191	332	P05141	SLC25A5	ENSG00000005022:SLC25A5	ADP/ATP translocase 2 OS=Homo sapiens OX=9606 GN=SLC25A5 PE=1 SV=7	MMXD complex [GO:0071817]; integral component of plasma membrane [GO:0005887]; membrane [GO:0016020]; membrane raft [GO:0045121]; mitochondrial inner membrane [GO:0005743]; mitochondrial nucleoid [GO:0042645]; mitochondrion [GO:0005739]; nucleus [GO:0005634]	46200	55100	62800	68000	46200	53900	73400	70800	28	5	0.0739073	0.82977	FALSE	11699.4	-0.0804093	0.847212	FALSE	non significant	0.0770898
368	199	O95573	ACSL3	ENSG00000123983:ACSL3	Long-chain-fatty-acid--CoA ligase 3 OS=Homo sapiens OX=9606 GN=ACSL3 PE=1 SV=3	Golgi apparatus [GO:0005794]; endoplasmic reticulum [GO:0005783]; endoplasmic reticulum membrane [GO:0005789]; integral component of membrane [GO:0016021]; lipid droplet [GO:0005811]; membrane [GO:0016020]; mitochondrial outer membrane [GO:0005741]; perinuclear region of cytoplasm [GO:0048471]; peroxisomal membrane [GO:0005778]	223000	264000	251000	248000	403000	447000	327000	317000	21	17	0.599521	0.0419992	FALSE	20183.2	0.105087	0.82011	FALSE	non significant	0.251001
506	225	Q99959	PKP2	ENSG00000057294:PKP2	Plakophilin-2 OS=Homo sapiens OX=9606 GN=PKP2 PE=1 SV=2	adherens junction [GO:0005912]; cell junction [GO:0030054]; cell-cell adherens junction [GO:0005913]; cell-cell junction [GO:0005911]; cornified envelope [GO:0001533]; cytoplasm [GO:0005737]; desmosome [GO:0030057]; integral component of membrane [GO:0016021]; intercalated disc [GO:0014704]; intermediate filament [GO:0005882]; nucleoplasm [GO:0005654]; nucleus [GO:0005634]; plasma membrane [GO:00…	184000	195000	171000	181000	210000	135000	187000	159000	17	17	-0.0811857	0.629346	FALSE	1590.25	-4.32796	0.000297169	TRUE	significant by RNA only	0.592763
440	261	Q96AY3	FKBP10	ENSG00000141756:FKBP10	Peptidyl-prolyl cis-trans isomerase FKBP10 OS=Homo sapiens OX=9606 GN=FKBP10 PE=1 SV=1	endoplasmic reticulum lumen [GO:0005788]	193000	234000	287000	235000	383000	332000	351000	285000	18	18	0.509548	0.0518658	FALSE	32281.3	0.653572	0.0142973	FALSE	non significant	0.577084
295	334	P10619	CTSA	ENSG00000064601:CTSA	Lysosomal protective protein OS=Homo sapiens OX=9606 GN=CTSA PE=1 SV=2	azurophil granule lumen [GO:0035578]; endoplasmic reticulum [GO:0005783]; extracellular exosome [GO:0070062]; extracellular region [GO:0005576]; intracellular membrane-bounded organelle [GO:0043231]; lysosomal lumen [GO:0043202]; lysosome [GO:0005764]; membrane [GO:0016020]; nucleoplasm [GO:0005654]	226000	254000	237000	249000	559000	471000	378000	373000	25	25	0.882592	0.0325961	FALSE	15880.8	0.662576	0.0179646	FALSE	non significant	0.764712
328	284	Q9NZW5	MPP6	ENSG00000105926:MPP6	MAGUK p55 subfamily member 6 OS=Homo sapiens OX=9606 GN=MPP6 PE=1 SV=2	extracellular exosome [GO:0070062]; membrane [GO:0016020]; plasma membrane [GO:0005886]	403000	380000	333000	322000	204000	216000	180000	191000	20	18	-0.862314	0.00535807	FALSE	1396.3	0.20352	0.495473	FALSE	non significant	0.418925
457	299	Q86W92	PPFIBP1	ENSG00000110841:PPFIBP1	Liprin-beta-1 OS=Homo sapiens OX=9606 GN=PPFIBP1 PE=1 SV=2	cytosol [GO:0005829]; focal adhesion [GO:0005925]; plasma membrane [GO:0005886]	218000	215000	198000	207000	199000	188000	153000	148000	16	16	-0.284542	0.135015	FALSE	9933.76	0.690817	2.50866e-05	FALSE	non significant	0.443358
202	351	P12236	SLC25A6	ENSG00000169100:SLC25A6	ADP/ATP translocase 3 OS=Homo sapiens OX=9606 GN=SLC25A6 PE=1 SV=4	TIM23 mitochondrial import inner membrane translocase complex [GO:0005744]; integral component of membrane [GO:0016021]; mitochondrial inner membrane [GO:0005743]; mitochondrion [GO:0005739]; nucleus [GO:0005634]	58900	66400	83400	83600	50000	41500	63200	50800	28	4	-0.508311	0.0773522	FALSE	490.698	0.0634204	0.911396	FALSE	non significant	0.179547
490	217	O15460	P4HA2	ENSG00000072682:P4HA2	Prolyl 4-hydroxylase subunit alpha-2 OS=Homo sapiens OX=9606 GN=P4HA2 PE=1 SV=1	cytosol [GO:0005829]; endoplasmic reticulum [GO:0005783]; endoplasmic reticulum lumen [GO:0005788]; intracellular membrane-bounded organelle [GO:0043231]; nucleoplasm [GO:0005654]	134000	152000	215000	162000	187000	199000	215000	145000	14	14	0.170167	0.492587	FALSE	11570.5	-0.738017	0.0974601	FALSE	non significant	0.354381
335	433	P62424	RPL7A	ENSG00000148303:RPL7A	60S ribosomal protein L7a OS=Homo sapiens OX=9606 GN=RPL7A PE=1 SV=2	cytoplasm [GO:0005737]; cytosol [GO:0005829]; cytosolic large ribosomal subunit [GO:0022625]; focal adhesion [GO:0005925]; membrane [GO:0016020]; nucleolus [GO:0005730]; nucleus [GO:0005634]; polysomal ribosome [GO:0042788]	339000	353000	372000	355000	310000	277000	335000	296000	19	19	-0.22036	0.066781	FALSE	57505.9	0.466214	0.195399	FALSE	non significant	0.320523
3314	3610	Q9P2D7	DNAH1	ENSG00000114841:DNAH1	Dynein heavy chain 1 axonemal OS=Homo sapiens OX=9606 GN=DNAH1 PE=1 SV=4	axonemal dynein complex [GO:0005858]; axoneme [GO:0005930]; dynein complex [GO:0030286]; extracellular region [GO:0005576]; inner dynein arm [GO:0036156]; microtubule [GO:0005874]; sperm flagellum [GO:0036126]	1170	2020	1250	1610	5360	3410	2220	4340	1	1	1.34135	0.0407147	TRUE	806.305	1.42261	1.32838e-08	TRUE	significantly consistently upregulated	1.38138
372	551	Q16643	DBN1	ENSG00000113758:DBN1	Drebrin OS=Homo sapiens OX=9606 GN=DBN1 PE=1 SV=4	actin cytoskeleton [GO:0015629]; actomyosin [GO:0042641]; cortical actin cytoskeleton [GO:0030864]; cortical cytoskeleton [GO:0030863]; cytoplasm [GO:0005737]; cytoskeleton [GO:0005856]; dendrite [GO:0030425]; gap junction [GO:0005921]; glutamatergic synapse [GO:0098978]; growth cone [GO:0030426]; lamellipodium [GO:0030027]; plasma membrane [GO:0005886]; postsynaptic cytosol [GO:0099524]; postsyn…	41500	44200	42100	37400	32800	34600	29500	32300	9	9	-0.354608	0.0189606	FALSE	20694.5	-0.428262	0.0414861	FALSE	non significant	0.389698
165	94	P43121	MCAM	ENSG00000076706:MCAM	Cell surface glycoprotein MUC18 OS=Homo sapiens OX=9606 GN=MCAM PE=1 SV=2	external side of plasma membrane [GO:0009897]; extracellular region [GO:0005576]; extracellular space [GO:0005615]; focal adhesion [GO:0005925]; integral component of membrane [GO:0016021]; nucleus [GO:0005634]; plasma membrane [GO:0005886]	644000	675000	667000	654000	330000	342000	306000	324000	28	28	-1.01981	0.00224908	TRUE	33974.3	-1.85141	2.26294e-07	TRUE	significantly consistently downregulated	1.37407
532	640	P09211	GSTP1	ENSG00000084207:GSTP1	Glutathione S-transferase P OS=Homo sapiens OX=9606 GN=GSTP1 PE=1 SV=2	TRAF2-GSTP1 complex [GO:0097057]; cytoplasm [GO:0005737]; cytosol [GO:0005829]; extracellular exosome [GO:0070062]; extracellular region [GO:0005576]; extracellular space [GO:0005615]; ficolin-1-rich granule lumen [GO:1904813]; mitochondrion [GO:0005739]; nucleus [GO:0005634]; plasma membrane [GO:0005886]; secretory granule lumen [GO:0034774]; vesicle [GO:0031982]	131000	131000	125000	137000	103000	137000	132000	146000	12	12	-0.0166147	0.875199	FALSE	17228.4	-0.696708	0.00229609	FALSE	non significant	0.10759
357	347	P50148	GNAQ	ENSG00000156052:GNAQ	Guanine nucleotide-binding protein G(q) subunit alpha OS=Homo sapiens OX=9606 GN=GNAQ PE=1 SV=4	cytoplasm [GO:0005737]; extracellular exosome [GO:0070062]; heterotrimeric G-protein complex [GO:0005834]; lysosomal membrane [GO:0005765]; nuclear membrane [GO:0031965]; photoreceptor outer segment [GO:0001750]; plasma membrane [GO:0005886]	99800	101000	88300	84100	177000	115000	75400	68500	17	9	0.224048	0.800405	FALSE	4752.66	-1.032	0.000567897	TRUE	significant by RNA only	0.48085
336	528	P84095	RHOG	ENSG00000177105:RHOG	Rho-related GTP-binding protein RhoG OS=Homo sapiens OX=9606 GN=RHOG PE=1 SV=1	cell cortex [GO:0005938]; cell projection [GO:0042995]; cytoplasm [GO:0005737]; cytosol [GO:0005829]; endoplasmic reticulum membrane [GO:0005789]; extracellular exosome [GO:0070062]; focal adhesion [GO:0005925]; plasma membrane [GO:0005886]; secretory granule membrane [GO:0030667]	406000	400000	292000	331000	346000	367000	305000	327000	16	14	-0.0873997	0.666366	FALSE	1349.73	0.311606	0.635528	FALSE	non significant	0.165028
144	495	P51572	BCAP31	ENSG00000185825:BCAP31	B-cell receptor-associated protein 31 OS=Homo sapiens OX=9606 GN=BCAP31 PE=1 SV=3	Golgi cisterna membrane [GO:0032580]; clathrin-coated vesicle [GO:0030136]; cytosol [GO:0005829]; endoplasmic reticulum [GO:0005783]; endoplasmic reticulum membrane [GO:0005789]; endoplasmic reticulum-Golgi intermediate compartment membrane [GO:0033116]; integral component of lumenal side of endoplasmic reticulum membrane [GO:0071556]; integral component of plasma membrane [GO:0005887]; lipid dro…	1210000	1070000	1290000	1160000	3480000	2930000	2120000	1550000	28	28	1.09158	0.0722825	FALSE	13088.7	0.0426637	0.909485	FALSE	non significant	0.215803
601	308	P53621	COPA	ENSG00000122218:COPA	Coatomer subunit alpha OS=Homo sapiens OX=9606 GN=COPA PE=1 SV=2	COPI vesicle coat [GO:0030126]; Golgi membrane [GO:0000139]; cytoplasm [GO:0005737]; cytosol [GO:0005829]; endoplasmic reticulum membrane [GO:0005789]; extracellular exosome [GO:0070062]; extracellular space [GO:0005615]; membrane [GO:0016020]; transport vesicle [GO:0030133]	163000	145000	182000	221000	209000	183000	188000	173000	14	14	0.0828003	0.624806	FALSE	26050.6	-0.0299536	0.899087	FALSE	non significant	0.0498013
591	203	O14639	ABLIM1	ENSG00000099204:ABLIM1	Actin-binding LIM protein 1 OS=Homo sapiens OX=9606 GN=ABLIM1 PE=1 SV=3	actin cytoskeleton [GO:0015629]; cytoplasm [GO:0005737]; lamellipodium [GO:0030027]; stress fiber [GO:0001725]	169000	168000	169000	178000	118000	89400	81000	83700	14	14	-0.878306	0.0287138	FALSE	7204.46	-1.5695	5.50032e-09	TRUE	significant by RNA only	1.1741
272	534	P21291	CSRP1	ENSG00000159176:CSRP1	Cysteine and glycine-rich protein 1 OS=Homo sapiens OX=9606 GN=CSRP1 PE=1 SV=3	Z disc [GO:0030018]; cytoplasm [GO:0005737]; extracellular exosome [GO:0070062]; focal adhesion [GO:0005925]; nucleus [GO:0005634]	310000	393000	554000	576000	245000	229000	217000	224000	12	12	-1.00236	0.0598474	FALSE	22816.8	-1.38072	4.63198e-12	TRUE	significant by RNA only	1.17643
484	365	P10253	GAA	ENSG00000171298:GAA	Lysosomal alpha-glucosidase OS=Homo sapiens OX=9606 GN=GAA PE=1 SV=4	azurophil granule membrane [GO:0035577]; extracellular exosome [GO:0070062]; ficolin-1-rich granule membrane [GO:0101003]; lysosomal lumen [GO:0043202]; lysosomal membrane [GO:0005765]; lysosome [GO:0005764]; membrane [GO:0016020]; plasma membrane [GO:0005886]; tertiary granule membrane [GO:0070821]	96800	98200	117000	102000	99600	100000	188000	187000	13	13	0.472927	0.324256	FALSE	7162.74	1.38797	0.00011162	TRUE	significant by RNA only	0.810191
620	291	Q9BZF9	UACA	ENSG00000137831:UACA	Uveal autoantigen with coiled-coil domains and ankyrin repeats OS=Homo sapiens OX=9606 GN=UACA PE=1 SV=2	cytoskeleton [GO:0005856]; cytosol [GO:0005829]; extracellular exosome [GO:0070062]; extracellular region [GO:0005576]; nucleus [GO:0005634]	155000	152000	160000	147000	210000	227000	270000	277000	15	15	0.68042	0.0273823	FALSE	17463.7	0.486704	0.107227	FALSE	non significant	0.575468
412	215	P53992	SEC24C	ENSG00000176986:SEC24C	Protein transport protein Sec24C OS=Homo sapiens OX=9606 GN=SEC24C PE=1 SV=3	COPII vesicle coat [GO:0030127]; ER to Golgi transport vesicle membrane [GO:0012507]; Golgi membrane [GO:0000139]; cytosol [GO:0005829]; endoplasmic reticulum membrane [GO:0005789]	120000	154000	138000	144000	108000	108000	137000	127000	15	15	-0.21205	0.20075	FALSE	11721.5	0.0415562	0.84601	FALSE	non significant	0.0938724
228	617	Q9HAV0	GNB4	ENSG00000114450:GNB4	Guanine nucleotide-binding protein subunit beta-4 OS=Homo sapiens OX=9606 GN=GNB4 PE=1 SV=3	cytosol [GO:0005829]; extracellular exosome [GO:0070062]; lysosomal membrane [GO:0005765]	41900	38000	38200	45700	22200	22000	21100	19000	15	2	-0.958331	0.00274007	FALSE	5398.39	-0.748473	0.00157221	FALSE	non significant	0.846927
264	362	Q14344	GNA13	ENSG00000120063:GNA13	Guanine nucleotide-binding protein subunit alpha-13 OS=Homo sapiens OX=9606 GN=GNA13 PE=1 SV=2	brush border membrane [GO:0031526]; cytoplasm [GO:0005737]; cytosol [GO:0005829]; extracellular exosome [GO:0070062]; focal adhesion [GO:0005925]; heterotrimeric G-protein complex [GO:0005834]; melanosome [GO:0042470]; membrane [GO:0016020]; nucleus [GO:0005634]; plasma membrane [GO:0005886]	149000	151000	137000	126000	118000	129000	111000	109000	14	8	-0.269712	0.0571098	FALSE	6251.3	-0.19342	0.537811	FALSE	non significant	0.228403
257	600	O14828	SCAMP3	ENSG00000116521:SCAMP3	Secretory carrier-associated membrane protein 3 OS=Homo sapiens OX=9606 GN=SCAMP3 PE=1 SV=3	Golgi apparatus [GO:0005794]; Golgi membrane [GO:0000139]; extracellular exosome [GO:0070062]; integral component of membrane [GO:0016021]; intracellular membrane-bounded organelle [GO:0043231]; recycling endosome membrane [GO:0055038]; trans-Golgi network membrane [GO:0032588]	339000	268000	206000	223000	233000	185000	269000	301000	12	12	-0.0684411	0.842249	FALSE	6275.32	0.350291	0.412136	FALSE	non significant	0.154836
621	245	O75970	MPDZ	ENSG00000107186:MPDZ	Multiple PDZ domain protein OS=Homo sapiens OX=9606 GN=MPDZ PE=1 SV=2	Schmidt-Lanterman incisure [GO:0043220]; apical plasma membrane [GO:0016324]; apicolateral plasma membrane [GO:0016327]; bicellular tight junction [GO:0005923]; cytoplasm [GO:0005737]; cytoplasmic vesicle [GO:0031410]; dendrite [GO:0030425]; postsynaptic density [GO:0014069]; postsynaptic membrane [GO:0045211]	154000	143000	121000	136000	114000	94600	83600	91600	17	17	-0.529531	0.0289325	FALSE	8460.29	-0.442104	0.0882527	FALSE	non significant	0.483847
520	377	P30837	ALDH1B1	ENSG00000137124:ALDH1B1	Aldehyde dehydrogenase X mitochondrial OS=Homo sapiens OX=9606 GN=ALDH1B1 PE=1 SV=3	intracellular membrane-bounded organelle [GO:0043231]; mitochondrial matrix [GO:0005759]; mitochondrion [GO:0005739]; nucleoplasm [GO:0005654]	76300	86100	108000	117000	62600	65100	59500	57400	13	10	-0.6634	0.0568491	FALSE	5341.43	-1.32575	5.16959e-08	TRUE	significant by RNA only	0.937817
605	427	Q13948	CUX1	ENSG00000257923:CUX1	Protein CASP OS=Homo sapiens OX=9606 GN=CUX1 PE=1 SV=2	Golgi apparatus [GO:0005794]; Golgi membrane [GO:0000139]; integral component of Golgi membrane [GO:0030173]; nuclear chromatin [GO:0000790]; nucleoplasm [GO:0005654]	105000	127000	114000	117000	175000	181000	157000	150000	12	12	0.517997	0.0133876	FALSE	6303.85	-0.324701	0.279076	FALSE	non significant	0.410115
1744	2452	Q9BV40	VAMP8	ENSG00000118640:VAMP8	Vesicle-associated membrane protein 8 OS=Homo sapiens OX=9606 GN=VAMP8 PE=1 SV=1	SNARE complex [GO:0031201]; azurophil granule membrane [GO:0035577]; clathrin-coated vesicle membrane [GO:0030665]; cytoplasm [GO:0005737]; cytosol [GO:0005829]; early endosome [GO:0005769]; early endosome membrane [GO:0031901]; extracellular exosome [GO:0070062]; integral component of membrane [GO:0016021]; late endosome membrane [GO:0031902]; lysosomal membrane [GO:0005765]; membrane [GO:001602…	34700	45000	22800	31500	16200	17600	14200	18400	1	1	-1.01298	0.0444475	TRUE	417.09	-1.82053	2.00527e-05	TRUE	significantly consistently downregulated	1.358
527	375	P11586	MTHFD1	ENSG00000100714:MTHFD1	C-1-tetrahydrofolate synthase cytoplasmic OS=Homo sapiens OX=9606 GN=MTHFD1 PE=1 SV=3	cytoplasm [GO:0005737]; cytosol [GO:0005829]; extracellular exosome [GO:0070062]; membrane [GO:0016020]; mitochondrion [GO:0005739]	181000	191000	150000	157000	170000	214000	161000	130000	15	14	-0.00852407	0.928466	FALSE	6491.02	0.144266	0.686672	FALSE	non significant	0.0350676
508	657	Q9H4G4	GLIPR2	ENSG00000122694:GLIPR2	Golgi-associated plant pathogenesis-related protein 1 OS=Homo sapiens OX=9606 GN=GLIPR2 PE=1 SV=3	Golgi membrane [GO:0000139]; extracellular exosome [GO:0070062]; extracellular space [GO:0005615]	202000	195000	165000	177000	79400	84800	87400	92900	8	8	-1.10107	0.00229584	TRUE	2466.19	-1.61486	7.32329e-12	TRUE	significantly consistently downregulated	1.33345
355	486	P62937	PPIA	ENSG00000196262:PPIA	Peptidyl-prolyl cis-trans isomerase A OS=Homo sapiens OX=9606 GN=PPIA PE=1 SV=2	cytosol [GO:0005829]; extracellular exosome [GO:0070062]; extracellular region [GO:0005576]; extracellular space [GO:0005615]; ficolin-1-rich granule lumen [GO:1904813]; focal adhesion [GO:0005925]; membrane [GO:0016020]; nucleus [GO:0005634]; protein-containing complex [GO:0032991]; secretory granule lumen [GO:0034774]; vesicle [GO:0031982]	328000	297000	531000	606000	204000	221000	282000	284000	12	12	-0.830257	0.106504	FALSE	61296.5	-0.469057	0.0816781	FALSE	non significant	0.624049
432	271	P00533	EGFR	ENSG00000146648:EGFR	Epidermal growth factor receptor OS=Homo sapiens OX=9606 GN=EGFR PE=1 SV=2	Golgi membrane [GO:0000139]; Shc-EGFR complex [GO:0070435]; apical plasma membrane [GO:0016324]; basal plasma membrane [GO:0009925]; basolateral plasma membrane [GO:0016323]; cell surface [GO:0009986]; clathrin-coated vesicle membrane [GO:0030665]; cytoplasm [GO:0005737]; early endosome membrane [GO:0031901]; endocytic vesicle [GO:0030139]; endoplasmic reticulum membrane [GO:0005789]; endosome [G…	214000	238000	194000	197000	173000	206000	184000	186000	17	16	-0.170567	0.18295	FALSE	11447.9	0.0252324	0.970553	FALSE	non significant	0.0656034
1109	1416	P09497	CLTB	ENSG00000175416:CLTB	Clathrin light chain B OS=Homo sapiens OX=9606 GN=CLTB PE=1 SV=1	ciliary membrane [GO:0060170]; clathrin coat [GO:0030118]; clathrin coat of coated pit [GO:0030132]; clathrin coat of trans-Golgi network vesicle [GO:0030130]; clathrin vesicle coat [GO:0030125]; clathrin-coated endocytic vesicle [GO:0045334]; cytosol [GO:0005829]; intracellular membrane-bounded organelle [GO:0043231]; plasma membrane [GO:0005886]; postsynaptic endocytic zone cytoplasmic componen…	44500	29800	32700	40600	101000	66300	104000	76400	4	3	1.23615	0.0140503	TRUE	4270.14	-1.38782	1.25866e-05	TRUE	inconsistently deregulated but significant in both	1.30979
479	260	P16435	POR	ENSG00000127948:POR	NADPH--cytochrome P450 reductase OS=Homo sapiens OX=9606 GN=POR PE=1 SV=2	cytosol [GO:0005829]; endoplasmic reticulum membrane [GO:0005789]; integral component of membrane [GO:0016021]; intracellular membrane-bounded organelle [GO:0043231]; membrane [GO:0016020]; mitochondrion [GO:0005739]	144000	146000	134000	133000	189000	193000	171000	140000	17	17	0.315178	0.124825	FALSE	5480.34	-0.558114	0.0686864	FALSE	non significant	0.419411
707	465	P61764	STXBP1	ENSG00000136854:STXBP1	Syntaxin-binding protein 1 OS=Homo sapiens OX=9606 GN=STXBP1 PE=1 SV=1	axon [GO:0030424]; cytoplasm [GO:0005737]; cytoskeleton [GO:0005856]; cytosol [GO:0005829]; extracellular exosome [GO:0070062]; glutamatergic synapse [GO:0098978]; mitochondrion [GO:0005739]; nucleoplasm [GO:0005654]; perinuclear region of cytoplasm [GO:0048471]; phagocytic vesicle [GO:0045335]; plasma membrane [GO:0005886]; platelet alpha granule [GO:0031091]; postsynapse [GO:0098794]; presynapt…	64100	64600	56400	67000	54800	62100	60700	66400	11	10	-0.047115	0.663049	FALSE	999.739	0.67582	0.00590554	FALSE	non significant	0.178441
318	399	Q99805	TM9SF2	ENSG00000125304:TM9SF2	Transmembrane 9 superfamily member 2 OS=Homo sapiens OX=9606 GN=TM9SF2 PE=1 SV=1	endosome [GO:0005768]; endosome membrane [GO:0010008]; extracellular exosome [GO:0070062]; integral component of plasma membrane [GO:0005887]; membrane [GO:0016020]	179000	181000	182000	171000	331000	413000	261000	268000	13	13	0.836258	0.0475718	FALSE	26613.1	0.0787744	0.831321	FALSE	non significant	0.256663
325	606	P61981	YWHAG	ENSG00000170027:YWHAG	14-3-3 protein gamma OS=Homo sapiens OX=9606 GN=YWHAG PE=1 SV=2	cytosol [GO:0005829]; extracellular exosome [GO:0070062]; focal adhesion [GO:0005925]; membrane [GO:0016020]; mitochondrion [GO:0005739]; presynapse [GO:0098793]	86700	85100	94800	88900	76100	85200	69200	72000	13	6	-0.232914	0.0758898	FALSE	19328.6	-0.864573	2.54062e-06	FALSE	non significant	0.448744
603	481	Q9UM54	MYO6	ENSG00000196586:MYO6	Unconventional myosin-VI OS=Homo sapiens OX=9606 GN=MYO6 PE=1 SV=4	Golgi apparatus [GO:0005794]; RNA polymerase II, holoenzyme [GO:0016591]; actin filament [GO:0005884]; apical part of cell [GO:0045177]; cell cortex [GO:0005938]; clathrin-coated pit [GO:0005905]; clathrin-coated vesicle membrane [GO:0030665]; cytoplasm [GO:0005737]; cytoplasmic vesicle [GO:0031410]; cytosol [GO:0005829]; endocytic vesicle [GO:0030139]; extracellular exosome [GO:0070062]; filamen…	151000	182000	150000	158000	75400	85500	89400	99500	17	13	-0.873794	0.00645173	FALSE	4950.88	0.328948	0.234228	FALSE	non significant	0.536127
239	453	P30040	ERP29	ENSG00000089248:ERP29	Endoplasmic reticulum resident protein 29 OS=Homo sapiens OX=9606 GN=ERP29 PE=1 SV=4	cell surface [GO:0009986]; endoplasmic reticulum [GO:0005783]; endoplasmic reticulum lumen [GO:0005788]; melanosome [GO:0042470]; membrane [GO:0016020]; smooth endoplasmic reticulum [GO:0005790]; transport vesicle [GO:0030133]	302000	335000	389000	349000	504000	531000	471000	358000	12	12	0.43897	0.0879159	FALSE	11153.8	-0.0884258	0.746958	FALSE	non significant	0.197019
653	553	O00116	AGPS	ENSG00000018510:AGPS	Alkyldihydroxyacetonephosphate synthase peroxisomal OS=Homo sapiens OX=9606 GN=AGPS PE=1 SV=1	cytosol [GO:0005829]; membrane [GO:0016020]; mitochondrion [GO:0005739]; nucleolus [GO:0005730]; peroxisomal matrix [GO:0005782]; peroxisomal membrane [GO:0005778]; peroxisome [GO:0005777]	47100	57600	55500	53200	74000	79800	95700	99800	12	12	0.710906	0.0184371	FALSE	11454.8	-0.644405	3.07338e-08	FALSE	non significant	0.676839
556	430	O15020	SPTBN2	ENSG00000173898:SPTBN2	Spectrin beta chain non-erythrocytic 2 OS=Homo sapiens OX=9606 GN=SPTBN2 PE=1 SV=3	apical plasma membrane [GO:0016324]; cell junction [GO:0030054]; cytosol [GO:0005829]; extracellular space [GO:0005615]; glutamatergic synapse [GO:0098978]; neuronal cell body [GO:0043025]; parallel fiber to Purkinje cell synapse [GO:0098688]; postsynaptic spectrin-associated cytoskeleton [GO:0099189]; presynapse [GO:0098793]; spectrin [GO:0008091]	26900	28600	28300	31400	17600	20800	19700	20000	13	5	-0.560746	0.00624335	FALSE	3598.28	0.927649	0.0135236	FALSE	non significant	0.721232
330	517	P32119	PRDX2	ENSG00000167815:PRDX2	Peroxiredoxin-2 OS=Homo sapiens OX=9606 GN=PRDX2 PE=1 SV=5	cytoplasm [GO:0005737]; cytosol [GO:0005829]; extracellular exosome [GO:0070062]	214000	209000	215000	210000	151000	161000	182000	178000	15	10	-0.335603	0.044846	FALSE	6368.85	-0.461422	0.0464931	FALSE	non significant	0.393516
540	559	P27105	STOM	ENSG00000148175:STOM	Erythrocyte band 7 integral membrane protein OS=Homo sapiens OX=9606 GN=STOM PE=1 SV=3	azurophil granule membrane [GO:0035577]; blood microparticle [GO:0072562]; cytoskeleton [GO:0005856]; endoplasmic reticulum [GO:0005783]; extracellular exosome [GO:0070062]; extracellular space [GO:0005615]; integral component of plasma membrane [GO:0005887]; melanosome [GO:0042470]; membrane [GO:0016020]; membrane raft [GO:0045121]; mitochondrion [GO:0005739]; perinuclear region of cytoplasm [GO…	107000	110000	80100	78800	95900	122000	111000	157000	11	11	0.370311	0.204416	FALSE	17436.6	-0.31664	0.203396	FALSE	non significant	0.342425
606	431	P18084	ITGB5	ENSG00000082781:ITGB5	Integrin beta-5 OS=Homo sapiens OX=9606 GN=ITGB5 PE=1 SV=1	cell surface [GO:0009986]; extracellular exosome [GO:0070062]; focal adhesion [GO:0005925]; integrin alphav-beta5 complex [GO:0034684]; phagocytic vesicle [GO:0045335]; plasma membrane [GO:0005886]; receptor complex [GO:0043235]	298000	266000	232000	272000	311000	295000	248000	258000	10	10	0.0582451	0.701349	FALSE	27660.4	-0.204094	0.646915	FALSE	non significant	0.10903
405	839	P32969	RPL9	ENSG00000163682:RPL9	60S ribosomal protein L9 OS=Homo sapiens OX=9606 GN=RPL9 PE=1 SV=1	cytosol [GO:0005829]; cytosolic large ribosomal subunit [GO:0022625]; focal adhesion [GO:0005925]; membrane [GO:0016020]; nucleus [GO:0005634]; ribosome [GO:0005840]	239000	225000	274000	251000	498000	482000	401000	323000	14	14	0.784883	0.0364426	FALSE	30946.8	0.1617	0.713745	FALSE	non significant	0.356253
514	567	Q6EMK4	VASN	ENSG00000168140:VASN	Vasorin OS=Homo sapiens OX=9606 GN=VASN PE=1 SV=1	cell surface [GO:0009986]; extracellular exosome [GO:0070062]; extracellular matrix [GO:0031012]; extracellular space [GO:0005615]; integral component of membrane [GO:0016021]; lysosomal membrane [GO:0005765]; mitochondrion [GO:0005739]; plasma membrane [GO:0005886]	168000	155000	125000	131000	132000	122000	90600	84000	11	11	-0.433931	0.131995	FALSE	13264	-0.306586	0.482467	FALSE	non significant	0.364743
155	417	Q15907	RAB11B	ENSG00000185236:RAB11B	Ras-related protein Rab-11B OS=Homo sapiens OX=9606 GN=RAB11B PE=1 SV=4	anchored component of synaptic vesicle membrane [GO:0098993]; cell junction [GO:0030054]; cytosol [GO:0005829]; endosome [GO:0005768]; extracellular exosome [GO:0070062]; phagocytic vesicle [GO:0045335]; phagocytic vesicle membrane [GO:0030670]; recycling endosome [GO:0055037]; recycling endosome membrane [GO:0055038]; synaptic vesicle [GO:0008021]	767000	737000	663000	713000	539000	457000	457000	443000	23	18	-0.60311	0.00930459	FALSE	1067.1	-0.17713	0.491708	FALSE	non significant	0.326847
481	383	Q8N8S7	ENAH	ENSG00000154380:ENAH	Protein enabled homolog OS=Homo sapiens OX=9606 GN=ENAH PE=1 SV=2	cell junction [GO:0030054]; cytoskeleton [GO:0005856]; cytosol [GO:0005829]; filopodium [GO:0030175]; focal adhesion [GO:0005925]; lamellipodium [GO:0030027]; plasma membrane [GO:0005886]; synapse [GO:0045202]	244000	242000	234000	262000	236000	199000	173000	170000	20	20	-0.335953	0.105277	FALSE	41574.7	-0.825827	0.000411526	FALSE	non significant	0.526725
406	315	P20073	ANXA7	ENSG00000138279:ANXA7	Annexin A7 OS=Homo sapiens OX=9606 GN=ANXA7 PE=1 SV=3	collagen-containing extracellular matrix [GO:0062023]; cytosol [GO:0005829]; endoplasmic reticulum membrane [GO:0005789]; extracellular exosome [GO:0070062]; membrane [GO:0016020]; nuclear envelope [GO:0005635]; nucleus [GO:0005634]; plasma membrane [GO:0005886]	329000	349000	267000	303000	189000	155000	277000	275000	14	13	-0.478047	0.162518	FALSE	9585.63	-0.27137	0.119585	FALSE	non significant	0.360177
343	935	P10606	COX5B	ENSG00000135940:COX5B	Cytochrome c oxidase subunit 5B mitochondrial OS=Homo sapiens OX=9606 GN=COX5B PE=1 SV=2	mitochondrial inner membrane [GO:0005743]; mitochondrion [GO:0005739]	226000	266000	304000	284000	457000	389000	325000	338000	12	12	0.482561	0.0575375	FALSE	6290.16	-0.203011	0.663432	FALSE	non significant	0.312994
186	391	Q9NRW1	RAB6B	ENSG00000154917:RAB6B	Ras-related protein Rab-6B OS=Homo sapiens OX=9606 GN=RAB6B PE=1 SV=1	Golgi apparatus [GO:0005794]; Golgi membrane [GO:0000139]; cytoplasmic vesicle [GO:0031410]; cytosol [GO:0005829]; endoplasmic reticulum-Golgi intermediate compartment [GO:0005793]; presynapse [GO:0098793]	23800	25900	20300	19700	18200	15000	13500	14800	18	3	-0.544522	0.0314575	FALSE	388.922	-1.90352	3.71305e-05	TRUE	significant by RNA only	1.01809
584	313	Q9NVI7	ATAD3A	ENSG00000197785:ATAD3A	ATPase family AAA domain-containing protein 3A OS=Homo sapiens OX=9606 GN=ATAD3A PE=1 SV=2	integral component of membrane [GO:0016021]; mitochondrial inner membrane [GO:0005743]; mitochondrial nucleoid [GO:0042645]; mitochondrion [GO:0005739]	22500	24600	26700	25200	37500	33400	47600	46700	14	3	0.738713	0.0309888	FALSE	2621.77	-0.199486	0.609384	FALSE	non significant	0.383879
308	552	P17066	HSPA6	ENSG00000173110:HSPA6	Heat shock 70 kDa protein 6 OS=Homo sapiens OX=9606 GN=HSPA6 PE=1 SV=2	blood microparticle [GO:0072562]; centriole [GO:0005814]; cytoplasm [GO:0005737]; cytosol [GO:0005829]; extracellular exosome [GO:0070062]; extracellular region [GO:0005576]; ficolin-1-rich granule lumen [GO:1904813]; nucleus [GO:0005634]; protein-containing complex [GO:0032991]; secretory granule lumen [GO:0034774]	79100	77700	73900	72800	164000	157000	83000	88100	16	2	0.697255	0.180085	FALSE	141.782	1.017	0.00429366	TRUE	significant by RNA only	0.842085
564	636	O94925	GLS	ENSG00000115419:GLS	Glutaminase kidney isoform mitochondrial OS=Homo sapiens OX=9606 GN=GLS PE=1 SV=1	cytosol [GO:0005829]; mitochondrial matrix [GO:0005759]; mitochondrion [GO:0005739]	61200	69200	89200	78400	83400	73700	108000	82600	10	10	0.222531	0.330777	FALSE	36690.3	-1.7405	4.98105e-08	TRUE	significant by RNA only	0.622347
109	496	Q15286	RAB35	ENSG00000111737:RAB35	Ras-related protein Rab-35 OS=Homo sapiens OX=9606 GN=RAB35 PE=1 SV=1	Golgi membrane [GO:0000139]; anchored component of synaptic vesicle membrane [GO:0098993]; cell projection membrane [GO:0031253]; clathrin-coated endocytic vesicle [GO:0045334]; clathrin-coated pit [GO:0005905]; clathrin-coated vesicle membrane [GO:0030665]; cytosol [GO:0005829]; endosome membrane [GO:0010008]; extracellular exosome [GO:0070062]; intercellular bridge [GO:0045171]; melanosome [GO:…	263000	247000	235000	215000	231000	281000	222000	249000	17	7	0.034157	0.819258	FALSE	4267.8	-0.133448	0.702641	FALSE	non significant	0.0675144
515	259	Q15075	EEA1	ENSG00000102189:EEA1	Early endosome antigen 1 OS=Homo sapiens OX=9606 GN=EEA1 PE=1 SV=2	axonal spine [GO:0044308]; cytoplasm [GO:0005737]; cytosol [GO:0005829]; early endosome [GO:0005769]; early endosome membrane [GO:0031901]; extracellular exosome [GO:0070062]; extrinsic component of plasma membrane [GO:0019897]; membrane [GO:0016020]; recycling endosome [GO:0055037]; serine-pyruvate aminotransferase complex [GO:0005969]	173000	217000	224000	243000	160000	172000	205000	262000	17	16	-0.1011	0.658851	FALSE	7497.86	0.225853	0.322456	FALSE	non significant	0.151108
370	918	P61353	RPL27	ENSG00000131469:RPL27	60S ribosomal protein L27 OS=Homo sapiens OX=9606 GN=RPL27 PE=1 SV=2	cytoplasmic side of rough endoplasmic reticulum membrane [GO:0098556]; cytosol [GO:0005829]; cytosolic large ribosomal subunit [GO:0022625]; extracellular exosome [GO:0070062]; focal adhesion [GO:0005925]; membrane [GO:0016020]; nucleus [GO:0005634]; ribonucleoprotein complex [GO:1990904]; ribosome [GO:0005840]	364000	345000	406000	360000	831000	675000	526000	441000	17	17	0.745547	0.0891465	FALSE	21248.6	0.371374	0.402643	FALSE	non significant	0.526191
418	463	P46783	RPS10	ENSG00000124614:RPS10	40S ribosomal protein S10 OS=Homo sapiens OX=9606 GN=RPS10 PE=1 SV=1	cytosol [GO:0005829]; cytosolic small ribosomal subunit [GO:0022627]; focal adhesion [GO:0005925]; membrane [GO:0016020]; nucleolus [GO:0005730]; nucleoplasm [GO:0005654]; ribosome [GO:0005840]	419000	480000	452000	482000	295000	210000	402000	336000	16	15	-0.56038	0.117802	FALSE	26868.7	0.342396	0.468716	FALSE	non significant	0.438032
585	406	P31040	SDHA	ENSG00000073578:SDHA	Succinate dehydrogenase [ubiquinone] flavoprotein subunit mitochondrial OS=Homo sapiens OX=9606 GN=SDHA PE=1 SV=2	mitochondrial inner membrane [GO:0005743]; mitochondrial respiratory chain complex II, succinate dehydrogenase complex (ubiquinone) [GO:0005749]; mitochondrion [GO:0005739]; nucleolus [GO:0005730]; plasma membrane succinate dehydrogenase complex [GO:0045282]	60600	73400	92600	86300	93600	114000	113000	93100	10	10	0.402883	0.109636	FALSE	8081.63	-0.284573	0.527697	FALSE	non significant	0.338599
650	360	Q5T9A4	ATAD3B	ENSG00000160072:ATAD3B	ATPase family AAA domain-containing protein 3B OS=Homo sapiens OX=9606 GN=ATAD3B PE=1 SV=1	ficolin-1-rich granule membrane [GO:0101003]; mitochondrial inner membrane [GO:0005743]; mitochondrion [GO:0005739]; plasma membrane [GO:0005886]; secretory granule membrane [GO:0030667]	50200	49100	66400	62500	51100	40600	73000	52900	14	3	-0.0686202	0.768484	FALSE	4225.29	0.220711	0.54382	FALSE	non significant	0.123066
419	297	P35232	PHB	ENSG00000167085:PHB	Prohibitin OS=Homo sapiens OX=9606 GN=PHB PE=1 SV=1	cell surface [GO:0009986]; cytoplasm [GO:0005737]; early endosome [GO:0005769]; extracellular exosome [GO:0070062]; integral component of plasma membrane [GO:0005887]; membrane [GO:0016020]; mitochondrial inner membrane [GO:0005743]; mitochondrion [GO:0005739]; nucleoplasm [GO:0005654]; nucleus [GO:0005634]; plasma membrane [GO:0005886]	142000	188000	247000	217000	160000	143000	186000	208000	15	15	-0.18798	0.544995	FALSE	8730.12	-0.502621	0.0987773	FALSE	non significant	0.307381
595	385	P30533	LRPAP1	ENSG00000163956:LRPAP1	Alpha-2-macroglobulin receptor-associated protein OS=Homo sapiens OX=9606 GN=LRPAP1 PE=1 SV=1	Golgi apparatus [GO:0005794]; Golgi lumen [GO:0005796]; cell surface [GO:0009986]; cis-Golgi network [GO:0005801]; endoplasmic reticulum [GO:0005783]; endoplasmic reticulum-Golgi intermediate compartment [GO:0005793]; endosome [GO:0005768]; endosome lumen [GO:0031904]; extracellular region [GO:0005576]; plasma membrane [GO:0005886]; rough endoplasmic reticulum lumen [GO:0048237]	124000	125000	123000	130000	201000	168000	123000	120000	13	13	0.285844	0.362048	FALSE	10432.9	-0.490474	0.0621477	FALSE	non significant	0.374432
464	310	Q13418	ILK	ENSG00000166333:ILK	Integrin-linked protein kinase OS=Homo sapiens OX=9606 GN=ILK PE=1 SV=2	cell junction [GO:0030054]; cell-cell junction [GO:0005911]; costamere [GO:0043034]; cytosol [GO:0005829]; dendritic shaft [GO:0043198]; focal adhesion [GO:0005925]; lamellipodium [GO:0030027]; membrane [GO:0016020]; neuronal cell body [GO:0043025]; nucleoplasm [GO:0005654]; plasma membrane [GO:0005886]; protein-containing complex [GO:0032991]; sarcomere [GO:0030017]; stress fiber [GO:0001725]; t…	332000	342000	320000	319000	247000	244000	206000	245000	16	16	-0.479068	0.0192659	FALSE	14019.1	-0.597145	0.00162525	FALSE	non significant	0.534858
244	402	P46777	RPL5	ENSG00000122406:RPL5	60S ribosomal protein L5 OS=Homo sapiens OX=9606 GN=RPL5 PE=1 SV=3	cytoplasm [GO:0005737]; cytosol [GO:0005829]; cytosolic large ribosomal subunit [GO:0022625]; endoplasmic reticulum [GO:0005783]; extracellular exosome [GO:0070062]; focal adhesion [GO:0005925]; membrane [GO:0016020]; nucleolus [GO:0005730]; nucleoplasm [GO:0005654]; nucleus [GO:0005634]; protein-containing complex [GO:0032991]; ribonucleoprotein complex [GO:1990904]	665000	605000	704000	678000	863000	671000	746000	601000	20	20	0.119489	0.522257	FALSE	36041	0.364468	0.307662	FALSE	non significant	0.208686
580	504	Q15599	SLC9A3R2	ENSG00000065054:SLC9A3R2	Na(+)/H(+) exchange regulatory cofactor NHE-RF2 OS=Homo sapiens OX=9606 GN=SLC9A3R2 PE=1 SV=2	apical plasma membrane [GO:0016324]; endomembrane system [GO:0012505]; extracellular exosome [GO:0070062]; focal adhesion [GO:0005925]; nucleus [GO:0005634]; plasma membrane [GO:0005886]	114000	105000	80800	85700	79400	70000	77600	78900	8	8	-0.333671	0.137813	FALSE	3010.14	-0.528856	0.069391	FALSE	non significant	0.420076
602	455	Q08379	GOLGA2	ENSG00000167110:GOLGA2	Golgin subfamily A member 2 OS=Homo sapiens OX=9606 GN=GOLGA2 PE=1 SV=3	COPII-coated ER to Golgi transport vesicle [GO:0030134]; Golgi apparatus [GO:0005794]; Golgi cis cisterna [GO:0000137]; Golgi cisterna membrane [GO:0032580]; Golgi membrane [GO:0000139]; cis-Golgi network [GO:0005801]; endoplasmic reticulum-Golgi intermediate compartment membrane [GO:0033116]; microtubule [GO:0005874]; mitotic spindle [GO:0072686]; spindle pole [GO:0000922]	127000	126000	152000	161000	242000	220000	179000	171000	11	11	0.520678	0.0547501	FALSE	8823.23	-0.646817	0.00256092	FALSE	non significant	0.58033
623	349	Q13724	MOGS	ENSG00000115275:MOGS	Mannosyl-oligosaccharide glucosidase OS=Homo sapiens OX=9606 GN=MOGS PE=1 SV=5	endoplasmic reticulum [GO:0005783]; endoplasmic reticulum membrane [GO:0005789]; extracellular exosome [GO:0070062]; integral component of membrane [GO:0016021]; membrane [GO:0016020]	169000	192000	167000	174000	179000	146000	160000	166000	16	16	-0.108813	0.304322	FALSE	9596.36	0.108306	0.729653	FALSE	non significant	0.10856
473	577	O60493	SNX3	ENSG00000112335:SNX3	Sorting nexin-3 OS=Homo sapiens OX=9606 GN=SNX3 PE=1 SV=3	clathrin-coated vesicle [GO:0030136]; cytoplasm [GO:0005737]; cytosol [GO:0005829]; early endosome [GO:0005769]; early endosome membrane [GO:0031901]; early phagosome [GO:0032009]; endosome membrane [GO:0010008]; extracellular exosome [GO:0070062]	103000	132000	109000	120000	106000	81200	113000	104000	11	8	-0.199055	0.275768	FALSE	7441.47	-0.364539	0.222163	FALSE	non significant	0.269376
495	342	O15269	SPTLC1	ENSG00000090054:SPTLC1	Serine palmitoyltransferase 1 OS=Homo sapiens OX=9606 GN=SPTLC1 PE=1 SV=1	SPOTS complex [GO:0035339]; endoplasmic reticulum [GO:0005783]; endoplasmic reticulum membrane [GO:0005789]; integral component of membrane [GO:0016021]; serine C-palmitoyltransferase complex [GO:0017059]	142000	158000	134000	143000	190000	209000	197000	195000	16	16	0.455106	0.0107238	FALSE	7122.34	-0.232495	0.390971	FALSE	non significant	0.325285
415	476	P48047	ATP5O	ENSG00000241837:ATP5O	ATP synthase subunit O mitochondrial OS=Homo sapiens OX=9606 GN=ATP5O PE=1 SV=1	mitochondrial inner membrane [GO:0005743]; mitochondrial proton-transporting ATP synthase complex [GO:0005753]; mitochondrion [GO:0005739]; nucleus [GO:0005634]; plasma membrane [GO:0005886]	353000	404000	487000	456000	241000	234000	321000	297000	13	13	-0.637241	0.0309888	FALSE	5195.7	-0.707226	0.00133531	FALSE	non significant	0.671322
604	300	Q96N67	DOCK7	ENSG00000116641:DOCK7	Dedicator of cytokinesis protein 7 OS=Homo sapiens OX=9606 GN=DOCK7 PE=1 SV=4	axon [GO:0030424]; basal part of cell [GO:0045178]; focal adhesion [GO:0005925]; growth cone [GO:0030426]; neuron projection [GO:0043005]	186000	178000	159000	214000	141000	129000	89300	89200	15	15	-0.716557	0.0552742	FALSE	9170.25	-0.362524	0.182171	FALSE	non significant	0.509676
437	411	Q96QK1	VPS35	ENSG00000069329:VPS35	Vacuolar protein sorting-associated protein 35 OS=Homo sapiens OX=9606 GN=VPS35 PE=1 SV=2	cytosol [GO:0005829]; early endosome [GO:0005769]; endosome [GO:0005768]; endosome membrane [GO:0010008]; extracellular exosome [GO:0070062]; glutamatergic synapse [GO:0098978]; late endosome [GO:0005770]; lysosomal membrane [GO:0005765]; lysosome [GO:0005764]; mitochondrion-derived vesicle [GO:0099073]; neuron projection [GO:0043005]; neuronal cell body [GO:0043025]; perinuclear region of cytopl…	129000	166000	154000	153000	158000	154000	165000	153000	15	15	0.0655883	0.53773	FALSE	12159.4	-0.22706	0.101781	FALSE	non significant	0.122035
557	446	Q04721	NOTCH2	ENSG00000134250:NOTCH2	Neurogenic locus notch homolog protein 2 OS=Homo sapiens OX=9606 GN=NOTCH2 PE=1 SV=3	Golgi membrane [GO:0000139]; cell surface [GO:0009986]; endoplasmic reticulum membrane [GO:0005789]; extracellular region [GO:0005576]; integral component of plasma membrane [GO:0005887]; membrane [GO:0016020]; nucleoplasm [GO:0005654]; nucleus [GO:0005634]; plasma membrane [GO:0005886]; receptor complex [GO:0043235]	71100	73400	61600	74400	54100	68200	38800	51300	12	12	-0.401217	0.155573	FALSE	54889.5	-0.0946523	0.860914	FALSE	non significant	0.194875
2468	3006	Q96QD5	DEPDC7	ENSG00000121690:DEPDC7	DEP domain-containing protein 7 OS=Homo sapiens OX=9606 GN=DEPDC7 PE=2 SV=1	cytosol [GO:0005829]	8680	7610	5480	5650	2140	2430	2350	2110	1	1	-1.60243	0.0149291	TRUE	915.432	1.02779	0.000468656	TRUE	inconsistently deregulated but significant in both	1.28334
533	288	P21281	ATP6V1B2	ENSG00000147416:ATP6V1B2	V-type proton ATPase subunit B brain isoform OS=Homo sapiens OX=9606 GN=ATP6V1B2 PE=1 SV=3	apical plasma membrane [GO:0016324]; cytosol [GO:0005829]; endomembrane system [GO:0012505]; extracellular exosome [GO:0070062]; integral component of membrane [GO:0016021]; intracellular membrane-bounded organelle [GO:0043231]; lysosomal membrane [GO:0005765]; melanosome [GO:0042470]; microvillus [GO:0005902]; plasma membrane [GO:0005886]; proton-transporting V-type ATPase, V1 domain [GO:0033180…	181000	148000	122000	127000	105000	93800	102000	107000	13	13	-0.503208	0.0753979	FALSE	9255.22	-0.645427	0.118537	FALSE	non significant	0.569898
468	366	Q9NR12	PDLIM7	ENSG00000196923:PDLIM7	PDZ and LIM domain protein 7 OS=Homo sapiens OX=9606 GN=PDLIM7 PE=1 SV=1	Z disc [GO:0030018]; actin cytoskeleton [GO:0015629]; cell-cell adherens junction [GO:0005913]; cytosol [GO:0005829]; filamentous actin [GO:0031941]; focal adhesion [GO:0005925]; nucleus [GO:0005634]; ruffle [GO:0001726]; stress fiber [GO:0001725]	167000	131000	143000	186000	95700	89600	69800	65600	11	11	-0.967241	0.0163891	FALSE	8082.28	-1.0075	0.00138744	TRUE	significant by RNA only	0.987163
449	321	Q14168	MPP2	ENSG00000108852:MPP2	MAGUK p55 subfamily member 2 OS=Homo sapiens OX=9606 GN=MPP2 PE=1 SV=3	cytoplasm [GO:0005737]; cytoskeleton [GO:0005856]; dendrite membrane [GO:0032590]; dendritic shaft [GO:0043198]; dendritic spine [GO:0043197]; dendritic spine membrane [GO:0032591]; postsynaptic density [GO:0014069]	229000	224000	183000	198000	128000	127000	123000	129000	14	13	-0.718062	0.0177385	FALSE	651.761	-1.09	0.000452771	TRUE	significant by RNA only	0.884694
443	341	P49841	GSK3B	ENSG00000082701:GSK3B	Glycogen synthase kinase-3 beta OS=Homo sapiens OX=9606 GN=GSK3B PE=1 SV=2	Wnt signalosome [GO:1990909]; axon [GO:0030424]; beta-catenin destruction complex [GO:0030877]; centrosome [GO:0005813]; cytoplasm [GO:0005737]; cytosol [GO:0005829]; dendrite [GO:0030425]; glutamatergic synapse [GO:0098978]; mitochondrion [GO:0005739]; nucleoplasm [GO:0005654]; nucleus [GO:0005634]; plasma membrane [GO:0005886]; postsynapse [GO:0098794]	143000	144000	125000	136000	82100	87100	76300	67200	11	7	-0.809397	0.00910815	FALSE	6072.67	-0.178608	0.572613	FALSE	non significant	0.380217
547	588	Q86UE4	MTDH	ENSG00000147649:MTDH	Protein LYRIC OS=Homo sapiens OX=9606 GN=MTDH PE=1 SV=2	apical plasma membrane [GO:0016324]; bicellular tight junction [GO:0005923]; cytoplasm [GO:0005737]; endoplasmic reticulum [GO:0005783]; endoplasmic reticulum membrane [GO:0005789]; fibrillar center [GO:0001650]; integral component of membrane [GO:0016021]; intercellular canaliculus [GO:0046581]; nuclear body [GO:0016604]; nuclear membrane [GO:0031965]; nucleus [GO:0005634]; perinuclear region of…	38200	37000	40200	37600	94400	99200	63700	53100	9	9	1.0206	0.0629737	FALSE	16489	-0.58131	0.0325769	FALSE	non significant	0.770249
661	520	P42892	ECE1	ENSG00000117298:ECE1	Endothelin-converting enzyme 1 OS=Homo sapiens OX=9606 GN=ECE1 PE=1 SV=2	Weibel-Palade body [GO:0033093]; early endosome [GO:0005769]; endosome [GO:0005768]; external side of plasma membrane [GO:0009897]; extracellular exosome [GO:0070062]; integral component of membrane [GO:0016021]; intrinsic component of endosome membrane [GO:0031302]; lysosomal membrane [GO:0005765]; membrane [GO:0016020]; perinuclear region of cytoplasm [GO:0048471]; plasma membrane [GO:0005886];…	68600	65400	55000	62500	82800	91400	81800	89900	8	8	0.459797	0.0189606	FALSE	17955.7	0.285448	0.326893	FALSE	non significant	0.362282
430	583	P61421	ATP6V0D1	ENSG00000159720:ATP6V0D1	V-type proton ATPase subunit d 1 OS=Homo sapiens OX=9606 GN=ATP6V0D1 PE=1 SV=1	apical plasma membrane [GO:0016324]; axon terminus [GO:0043679]; early endosome [GO:0005769]; endosome membrane [GO:0010008]; extracellular exosome [GO:0070062]; lysosomal membrane [GO:0005765]; membrane [GO:0016020]; phagocytic vesicle membrane [GO:0030670]; plasma membrane proton-transporting V-type ATPase complex [GO:0033181]; proton-transporting V-type ATPase, V0 domain [GO:0033179]; synaptic…	164000	154000	144000	143000	309000	315000	276000	279000	15	15	0.962557	0.00224908	FALSE	6069	-0.500391	0.00555684	FALSE	non significant	0.694013
516	512	Q9BTU6	PI4K2A	ENSG00000155252:PI4K2A	Phosphatidylinositol 4-kinase type 2-alpha OS=Homo sapiens OX=9606 GN=PI4K2A PE=1 SV=1	cell junction [GO:0030054]; cytoplasmic vesicle [GO:0031410]; cytosol [GO:0005829]; dendrite [GO:0030425]; endosome [GO:0005768]; growing cell tip [GO:0035838]; host cell presynaptic membrane [GO:0044231]; integral component of plasma membrane [GO:0005887]; intrinsic component of membrane [GO:0031224]; lysosomal membrane [GO:0005765]; membrane [GO:0016020]; membrane raft [GO:0045121]; mitochondri…	66700	81700	69300	68700	97900	110000	83600	79300	13	13	0.37261	0.0885398	FALSE	4621.18	-0.620313	0.00103179	FALSE	non significant	0.480765
451	623	P62269	RPS18	ENSG00000231500:RPS18	40S ribosomal protein S18 OS=Homo sapiens OX=9606 GN=RPS18 PE=1 SV=3	cytosol [GO:0005829]; cytosolic small ribosomal subunit [GO:0022627]; extracellular exosome [GO:0070062]; focal adhesion [GO:0005925]; membrane [GO:0016020]; nucleoplasm [GO:0005654]; nucleus [GO:0005634]; postsynaptic density [GO:0014069]; ribosome [GO:0005840]; small ribosomal subunit [GO:0015935]	545000	535000	525000	517000	746000	640000	508000	486000	17	17	0.165537	0.502542	FALSE	60394.4	0.654864	0.149848	FALSE	non significant	0.329248
404	539	P09496	CLTA	ENSG00000122705:CLTA	Clathrin light chain A OS=Homo sapiens OX=9606 GN=CLTA PE=1 SV=1	clathrin coat [GO:0030118]; clathrin coat of coated pit [GO:0030132]; clathrin coat of trans-Golgi network vesicle [GO:0030130]; clathrin complex [GO:0071439]; clathrin vesicle coat [GO:0030125]; clathrin-coated endocytic vesicle [GO:0045334]; cytoplasmic vesicle [GO:0031410]; cytosol [GO:0005829]; endolysosome membrane [GO:0036020]; membrane [GO:0016020]; plasma membrane [GO:0005886]; postsynapt…	519000	516000	507000	556000	280000	243000	279000	269000	13	12	-0.970056	0.00229584	FALSE	13977.5	-0.518119	0.038574	FALSE	non significant	0.708946
329	346	Q13425	SNTB2	ENSG00000168807:SNTB2	Beta-2-syntrophin OS=Homo sapiens OX=9606 GN=SNTB2 PE=1 SV=1	cytoplasm [GO:0005737]; dystrophin-associated glycoprotein complex [GO:0016010]; focal adhesion [GO:0005925]; membrane [GO:0016020]; microtubule [GO:0005874]; protein-containing complex [GO:0032991]; synapse [GO:0045202]; transport vesicle membrane [GO:0030658]	409000	419000	356000	403000	324000	303000	309000	280000	16	13	-0.384159	0.0163355	FALSE	7242.94	-0.232421	0.442284	FALSE	non significant	0.298809
2114	2063	Q9Y2E4	DIP2C	ENSG00000151240:DIP2C	Disco-interacting protein 2 homolog C OS=Homo sapiens OX=9606 GN=DIP2C PE=1 SV=2	NA	4310	3400	3610	3630	9230	8290	13300	14300	2	2	1.59362	0.0175299	TRUE	6925.61	-1.03148	0.0129135	TRUE	inconsistently deregulated but significant in both	1.2821
448	565	P26373	RPL13	ENSG00000167526:RPL13	60S ribosomal protein L13 OS=Homo sapiens OX=9606 GN=RPL13 PE=1 SV=4	cytosol [GO:0005829]; cytosolic large ribosomal subunit [GO:0022625]; cytosolic ribosome [GO:0022626]; endoplasmic reticulum [GO:0005783]; membrane [GO:0016020]; nucleolus [GO:0005730]; nucleus [GO:0005634]	474000	488000	505000	467000	394000	305000	426000	360000	16	16	-0.381125	0.0791988	FALSE	41586.3	0.37938	0.369965	FALSE	non significant	0.380252
524	521	P47756	CAPZB	ENSG00000077549:CAPZB	F-actin-capping protein subunit beta OS=Homo sapiens OX=9606 GN=CAPZB PE=1 SV=4	F-actin capping protein complex [GO:0008290]; WASH complex [GO:0071203]; actin cytoskeleton [GO:0015629]; cytoskeleton [GO:0005856]; cytosol [GO:0005829]; extracellular exosome [GO:0070062]; sarcomere [GO:0030017]	138000	163000	160000	159000	127000	155000	103000	112000	11	11	-0.319022	0.149935	FALSE	9100.9	-0.477756	0.0915714	FALSE	non significant	0.390403
521	329	Q6NYC8	PPP1R18	ENSG00000146112:PPP1R18	Phostensin OS=Homo sapiens OX=9606 GN=PPP1R18 PE=1 SV=1	cytoplasm [GO:0005737]; cytoskeleton [GO:0005856]	153000	161000	138000	170000	241000	168000	109000	128000	13	13	0.0546196	0.985191	FALSE	9274.82	0.648594	0.00115887	FALSE	non significant	0.188218
284	450	P39019	RPS19	ENSG00000105372:RPS19	40S ribosomal protein S19 OS=Homo sapiens OX=9606 GN=RPS19 PE=1 SV=2	cytoplasm [GO:0005737]; cytosol [GO:0005829]; cytosolic small ribosomal subunit [GO:0022627]; extracellular exosome [GO:0070062]; focal adhesion [GO:0005925]; membrane [GO:0016020]; nucleolus [GO:0005730]; nucleoplasm [GO:0005654]; postsynaptic density [GO:0014069]; ribosome [GO:0005840]	677000	661000	728000	725000	622000	531000	589000	518000	19	19	-0.304459	0.038796	FALSE	40395	0.353821	0.413826	FALSE	non significant	0.328213
421	1109	Q07021	C1QBP	ENSG00000108561:C1QBP	Complement component 1 Q subcomponent-binding protein mitochondrial OS=Homo sapiens OX=9606 GN=C1QBP PE=1 SV=1	GABA-ergic synapse [GO:0098982]; cell surface [GO:0009986]; cytoplasm [GO:0005737]; cytosol [GO:0005829]; extracellular space [GO:0005615]; glutamatergic synapse [GO:0098978]; membrane [GO:0016020]; mitochondrial matrix [GO:0005759]; mitochondrion [GO:0005739]; nucleolus [GO:0005730]; nucleus [GO:0005634]; plasma membrane [GO:0005886]; presynaptic active zone [GO:0048786]	176000	175000	269000	257000	489000	350000	462000	326000	7	7	0.891566	0.0346618	FALSE	11145.8	0.191438	0.706601	FALSE	non significant	0.413134
782	432	Q13423	NNT	ENSG00000112992:NNT	NAD(P) transhydrogenase mitochondrial OS=Homo sapiens OX=9606 GN=NNT PE=1 SV=3	integral component of membrane [GO:0016021]; membrane [GO:0016020]; mitochondrial inner membrane [GO:0005743]; mitochondrial respirasome [GO:0005746]; mitochondrion [GO:0005739]	77000	91300	93900	83500	133000	106000	107000	95700	10	10	0.353546	0.0842277	FALSE	10218.1	-0.4472	0.155811	FALSE	non significant	0.397625
2329	2291	O95980	RECK	ENSG00000122707:RECK	Reversion-inducing cysteine-rich protein with Kazal motifs OS=Homo sapiens OX=9606 GN=RECK PE=1 SV=1	Wnt signalosome [GO:1990909]; anchored component of membrane [GO:0031225]; extracellular region [GO:0005576]; membrane [GO:0016020]; plasma membrane [GO:0005886]	1430	1860	1470	1660	896.156	589.108	756.33	935.854	1	1	-1.0147	0.0189606	TRUE	2615.69	-1.51723	0.000615748	TRUE	significantly consistently downregulated	1.24078
551	413	P38117	ETFB	ENSG00000105379:ETFB	Electron transfer flavoprotein subunit beta OS=Homo sapiens OX=9606 GN=ETFB PE=1 SV=3	mitochondrial matrix [GO:0005759]; mitochondrion [GO:0005739]	145000	154000	250000	206000	195000	162000	270000	216000	11	11	0.159056	0.603232	FALSE	2260.97	0.0515779	0.938527	FALSE	non significant	0.0905747
480	467	P18031	PTPN1	ENSG00000196396:PTPN1	Tyrosine-protein phosphatase non-receptor type 1 OS=Homo sapiens OX=9606 GN=PTPN1 PE=1 SV=1	cytoplasmic side of endoplasmic reticulum membrane [GO:0098554]; cytosol [GO:0005829]; early endosome [GO:0005769]; endoplasmic reticulum [GO:0005783]; protein-containing complex [GO:0032991]; sorting endosome [GO:0097443]	77700	78300	65500	67600	66200	59400	58400	60100	10	10	-0.244096	0.0766108	FALSE	5030.07	-0.496339	0.000948049	FALSE	non significant	0.348073
5188	5147	Q68DA7	FMN1	ENSG00000248905:FMN1	Formin-1 OS=Homo sapiens OX=9606 GN=FMN1 PE=1 SV=3	actin filament [GO:0005884]; adherens junction [GO:0005912]; cytoplasm [GO:0005737]; endoplasmic reticulum membrane [GO:0005789]; nucleus [GO:0005634]; plasma membrane [GO:0005886]	7000	7580	8380	6780	21400	30800	13700	16500	1	1	1.47024	0.0390244	TRUE	4253.2	1.04113	0.000107348	TRUE	significantly consistently upregulated	1.23722
627	343	Q16822	PCK2	ENSG00000100889:PCK2	Phosphoenolpyruvate carboxykinase [GTP] mitochondrial OS=Homo sapiens OX=9606 GN=PCK2 PE=1 SV=4	cytosol [GO:0005829]; mitochondrial matrix [GO:0005759]; mitochondrion [GO:0005739]	77500	107000	112000	115000	85700	84800	113000	102000	13	13	-0.0941616	0.708193	FALSE	4234.66	-0.979003	0.0817866	FALSE	non significant	0.303619
455	537	P61313	RPL15	ENSG00000174748:RPL15	60S ribosomal protein L15 OS=Homo sapiens OX=9606 GN=RPL15 PE=1 SV=2	cytosol [GO:0005829]; cytosolic large ribosomal subunit [GO:0022625]; membrane [GO:0016020]; nucleus [GO:0005634]; ribosome [GO:0005840]	740000	806000	585000	735000	1480000	1030000	1200000	1020000	15	15	0.722802	0.0287683	FALSE	44535.7	0.223957	0.549937	FALSE	non significant	0.402339
215	460	Q02878	RPL6	ENSG00000089009:RPL6	60S ribosomal protein L6 OS=Homo sapiens OX=9606 GN=RPL6 PE=1 SV=3	cytoplasmic ribonucleoprotein granule [GO:0036464]; cytosol [GO:0005829]; cytosolic large ribosomal subunit [GO:0022625]; focal adhesion [GO:0005925]; membrane [GO:0016020]; nucleus [GO:0005634]; polysomal ribosome [GO:0042788]; postsynaptic density [GO:0014069]; rough endoplasmic reticulum [GO:0005791]	693000	718000	734000	654000	920000	739000	716000	625000	18	17	0.100051	0.611955	FALSE	52622.4	0.601002	0.13502	FALSE	non significant	0.245216
303	687	P09972	ALDOC	ENSG00000109107:ALDOC	Fructose-bisphosphate aldolase C OS=Homo sapiens OX=9606 GN=ALDOC PE=1 SV=2	cytoskeleton [GO:0005856]; cytosol [GO:0005829]; extracellular exosome [GO:0070062]; extracellular region [GO:0005576]; ficolin-1-rich granule lumen [GO:1904813]; secretory granule lumen [GO:0034774]; tertiary granule lumen [GO:1904724]	19500	30400	23700	30300	16500	15200	39700	53800	9	3	0.269039	0.912014	FALSE	552.17	2.67516	1.77753e-08	TRUE	significant by RNA only	0.848365
2247	2128	O95340	PAPSS2	ENSG00000198682:PAPSS2	Bifunctional 3'-phosphoadenosine 5'-phosphosulfate synthase 2 OS=Homo sapiens OX=9606 GN=PAPSS2 PE=1 SV=2	cytosol [GO:0005829]	1320	2820	1850	1660	6050	3440	4130	3220	1	1	1.13836	0.0409665	TRUE	14816.9	-1.28811	0.00147988	TRUE	inconsistently deregulated but significant in both	1.21092
423	542	Q86Y82	STX12	ENSG00000117758:STX12	Syntaxin-12 OS=Homo sapiens OX=9606 GN=STX12 PE=1 SV=1	Golgi membrane [GO:0000139]; SNARE complex [GO:0031201]; early endosome membrane [GO:0031901]; endomembrane system [GO:0012505]; integral component of membrane [GO:0016021]; integral component of synaptic vesicle membrane [GO:0030285]; membrane raft [GO:0045121]; phagocytic vesicle [GO:0045335]; phagophore assembly site [GO:0000407]; postsynaptic recycling endosome [GO:0098837]; recycling endosom…	135000	156000	131000	131000	143000	169000	144000	152000	11	11	0.136792	0.239925	FALSE	5511.7	-0.957708	7.45371e-07	FALSE	non significant	0.361948
583	357	P49748	ACADVL	ENSG00000072778:ACADVL	Very long-chain specific acyl-CoA dehydrogenase mitochondrial OS=Homo sapiens OX=9606 GN=ACADVL PE=1 SV=1	cytosol [GO:0005829]; mitochondrial inner membrane [GO:0005743]; mitochondrial matrix [GO:0005759]; mitochondrial membrane [GO:0031966]; mitochondrial nucleoid [GO:0042645]; mitochondrion [GO:0005739]; nucleolus [GO:0005730]; nucleus [GO:0005634]	78600	91800	95500	93200	120000	122000	126000	125000	14	13	0.457202	0.0257386	FALSE	24266.7	0.317022	0.363499	FALSE	non significant	0.380714
470	492	O15400	STX7	ENSG00000079950:STX7	Syntaxin-7 OS=Homo sapiens OX=9606 GN=STX7 PE=1 SV=4	SNARE complex [GO:0031201]; azurophil granule [GO:0042582]; early endosome [GO:0005769]; early endosome membrane [GO:0031901]; endocytic vesicle [GO:0030139]; endomembrane system [GO:0012505]; endosome [GO:0005768]; extracellular exosome [GO:0070062]; immunological synapse [GO:0001772]; integral component of membrane [GO:0016021]; late endosome [GO:0005770]; lysosomal membrane [GO:0005765]; lysos…	192000	169000	169000	190000	200000	170000	143000	151000	10	10	-0.116814	0.453485	FALSE	4821.86	-0.792979	0.000355369	FALSE	non significant	0.304353
501	927	P25398	RPS12	ENSG00000112306:RPS12	40S ribosomal protein S12 OS=Homo sapiens OX=9606 GN=RPS12 PE=1 SV=3	Golgi apparatus [GO:0005794]; cytosol [GO:0005829]; cytosolic small ribosomal subunit [GO:0022627]; intracellular membrane-bounded organelle [GO:0043231]; membrane [GO:0016020]; nucleoplasm [GO:0005654]	329000	302000	453000	395000	609000	524000	496000	353000	9	9	0.422335	0.186017	FALSE	28970.5	0.220254	0.642206	FALSE	non significant	0.304994
530	499	Q9BS26	ERP44	ENSG00000023318:ERP44	Endoplasmic reticulum resident protein 44 OS=Homo sapiens OX=9606 GN=ERP44 PE=1 SV=1	cell surface [GO:0009986]; endoplasmic reticulum lumen [GO:0005788]; endoplasmic reticulum membrane [GO:0005789]; endoplasmic reticulum-Golgi intermediate compartment [GO:0005793]; extracellular exosome [GO:0070062]; extracellular region [GO:0005576]; specific granule lumen [GO:0035580]	161000	181000	192000	158000	267000	301000	212000	218000	13	13	0.528268	0.0537957	FALSE	4813.65	-0.120176	0.803088	FALSE	non significant	0.251962
291	799	Q9UBI6	GNG12	ENSG00000172380:GNG12	Guanine nucleotide-binding protein G(I)/G(S)/G(O) subunit gamma-12 OS=Homo sapiens OX=9606 GN=GNG12 PE=1 SV=3	G-protein beta/gamma-subunit complex [GO:0031680]; actin filament [GO:0005884]; extracellular exosome [GO:0070062]; heterotrimeric G-protein complex [GO:0005834]; plasma membrane [GO:0005886]	1130000	1210000	1090000	1070000	638000	556000	595000	600000	13	13	-0.913518	0.0022057	FALSE	26686.4	-1.09245	6.29759e-08	TRUE	significant by RNA only	0.998985
550	367	Q96CS3	FAF2	ENSG00000113194:FAF2	FAS-associated factor 2 OS=Homo sapiens OX=9606 GN=FAF2 PE=1 SV=2	VCP-NPL4-UFD1 AAA ATPase complex [GO:0034098]; azurophil granule lumen [GO:0035578]; endoplasmic reticulum [GO:0005783]; extracellular region [GO:0005576]; lipid droplet [GO:0005811]	134000	116000	118000	126000	203000	142000	132000	113000	12	12	0.256204	0.411875	FALSE	8473.16	0.0875331	0.787312	FALSE	non significant	0.149754
660	498	Q99714	HSD17B10	ENSG00000072506:HSD17B10	3-hydroxyacyl-CoA dehydrogenase type-2 OS=Homo sapiens OX=9606 GN=HSD17B10 PE=1 SV=3	cytoplasm [GO:0005737]; mitochondrial matrix [GO:0005759]; mitochondrial ribonuclease P complex [GO:0030678]; mitochondrion [GO:0005739]; plasma membrane [GO:0005886]	76300	93300	111000	100000	152000	97600	123000	113000	8	8	0.351493	0.181445	FALSE	3018.15	-0.904346	1.3925e-06	FALSE	non significant	0.563801
561	456	Q9UQ80	PA2G4	ENSG00000170515:PA2G4	Proliferation-associated protein 2G4 OS=Homo sapiens OX=9606 GN=PA2G4 PE=1 SV=3	azurophil granule lumen [GO:0035578]; cytoplasm [GO:0005737]; extracellular exosome [GO:0070062]; extracellular region [GO:0005576]; membrane [GO:0016020]; nucleolus [GO:0005730]; nucleus [GO:0005634]	170000	188000	174000	198000	241000	232000	205000	183000	11	11	0.238117	0.155012	FALSE	9603.75	0.237867	0.547417	FALSE	non significant	0.237992
562	480	O00186	STXBP3	ENSG00000116266:STXBP3	Syntaxin-binding protein 3 OS=Homo sapiens OX=9606 GN=STXBP3 PE=1 SV=2	apical plasma membrane [GO:0016324]; basolateral plasma membrane [GO:0016323]; cytosol [GO:0005829]; extracellular exosome [GO:0070062]; phagocytic vesicle [GO:0045335]; plasma membrane [GO:0005886]; platelet alpha granule [GO:0031091]; presynapse [GO:0098793]; specific granule [GO:0042581]; tertiary granule [GO:0070820]	189000	179000	160000	166000	131000	134000	126000	117000	13	12	-0.450107	0.0120644	FALSE	3927.49	-0.173702	0.329421	FALSE	non significant	0.279615
365	737	O75915	ARL6IP5	ENSG00000144746:ARL6IP5	PRA1 family protein 3 OS=Homo sapiens OX=9606 GN=ARL6IP5 PE=1 SV=1	cytoskeleton [GO:0005856]; endoplasmic reticulum membrane [GO:0005789]; integral component of membrane [GO:0016021]; membrane [GO:0016020]; plasma membrane [GO:0005886]	402000	452000	437000	412000	589000	464000	405000	399000	14	14	0.124895	0.576391	FALSE	12289.9	-0.0367856	0.896129	FALSE	non significant	0.0677817
98	484	Q92930	RAB8B	ENSG00000166128:RAB8B	Ras-related protein Rab-8B OS=Homo sapiens OX=9606 GN=RAB8B PE=1 SV=2	cell tip [GO:0051286]; endosome [GO:0005768]; extracellular exosome [GO:0070062]; intracellular membrane-bounded organelle [GO:0043231]; nuclear body [GO:0016604]; nucleoplasm [GO:0005654]; perinuclear region of cytoplasm [GO:0048471]; peroxisomal membrane [GO:0005778]; phagocytic vesicle [GO:0045335]; phagocytic vesicle membrane [GO:0030670]; plasma membrane [GO:0005886]; recycling endosome memb…	39900	31500	27700	32900	70800	47100	51000	50300	16	2	0.73171	0.0314575	FALSE	7734.96	0.0116399	0.978484	FALSE	non significant	0.0922876
1459	1330	Q7KYR7	BTN2A1	ENSG00000112763:BTN2A1	Butyrophilin subfamily 2 member A1 OS=Homo sapiens OX=9606 GN=BTN2A1 PE=1 SV=3	external side of plasma membrane [GO:0009897]; integral component of plasma membrane [GO:0005887]; plasma membrane [GO:0005886]	28500	31000	32900	24900	14600	12200	8140	11800	3	3	-1.32747	0.016852	TRUE	2541.12	-1.01425	0.000238561	TRUE	significantly consistently downregulated	1.16034
671	555	P30153	PPP2R1A	ENSG00000105568:PPP2R1A	Serine/threonine-protein phosphatase 2A 65 kDa regulatory subunit A alpha isoform OS=Homo sapiens OX=9606 GN=PPP2R1A PE=1 SV=4	chromosome, centromeric region [GO:0000775]; cytoplasm [GO:0005737]; cytosol [GO:0005829]; dendrite [GO:0030425]; extracellular exosome [GO:0070062]; glutamatergic synapse [GO:0098978]; lateral plasma membrane [GO:0016328]; membrane [GO:0016020]; microtubule cytoskeleton [GO:0015630]; mitochondrion [GO:0005739]; nucleus [GO:0005634]; protein phosphatase type 2A complex [GO:0000159]	108000	106000	109000	110000	70700	99500	82600	81500	9	9	-0.373224	0.0828962	FALSE	16688.8	-0.205174	0.198842	FALSE	non significant	0.276723
428	490	P42765	ACAA2	ENSG00000167315:ACAA2	3-ketoacyl-CoA thiolase mitochondrial OS=Homo sapiens OX=9606 GN=ACAA2 PE=1 SV=2	mitochondrial matrix [GO:0005759]; mitochondrion [GO:0005739]	156000	180000	244000	207000	228000	185000	282000	234000	9	9	0.239315	0.343685	FALSE	5932.64	-0.509968	0.0184462	FALSE	non significant	0.349347
760	643	Q9ULV4	CORO1C	ENSG00000110880:CORO1C	Coronin-1C OS=Homo sapiens OX=9606 GN=CORO1C PE=1 SV=1	actin cytoskeleton [GO:0015629]; cell cortex [GO:0005938]; endosome membrane [GO:0010008]; flotillin complex [GO:0016600]; focal adhesion [GO:0005925]; lamellipodium [GO:0030027]; lateral plasma membrane [GO:0016328]; ruffle membrane [GO:0032587]; sarcolemma [GO:0042383]; sarcomere [GO:0030017]; synapse [GO:0045202]	75700	98200	148000	167000	64800	64500	65100	71600	8	8	-0.878113	0.118027	FALSE	23394.4	-0.878255	1.66377e-05	FALSE	non significant	0.878184
491	331	Q96AQ6	PBXIP1	ENSG00000163346:PBXIP1	Pre-B-cell leukemia transcription factor-interacting protein 1 OS=Homo sapiens OX=9606 GN=PBXIP1 PE=1 SV=1	cytosol [GO:0005829]; microtubule [GO:0005874]; nucleus [GO:0005634]	116000	140000	107000	107000	149000	143000	115000	116000	14	14	0.15415	0.406674	FALSE	11548.3	0.322631	0.356407	FALSE	non significant	0.223011
668	459	P28331	NDUFS1	ENSG00000023228:NDUFS1	NADH-ubiquinone oxidoreductase 75 kDa subunit mitochondrial OS=Homo sapiens OX=9606 GN=NDUFS1 PE=1 SV=3	mitochondrial intermembrane space [GO:0005758]; mitochondrial matrix [GO:0005759]; mitochondrial respiratory chain complex I [GO:0005747]; mitochondrion [GO:0005739]; plasma membrane respiratory chain complex I [GO:0045272]	76500	88300	104000	95300	81000	80900	100000	95500	11	11	-0.0267951	0.898405	FALSE	13295.1	-0.344788	0.0242276	FALSE	non significant	0.0961177
587	622	O00560	SDCBP	ENSG00000137575:SDCBP	Syntenin-1 OS=Homo sapiens OX=9606 GN=SDCBP PE=1 SV=1	adherens junction [GO:0005912]; azurophil granule lumen [GO:0035578]; blood microparticle [GO:0072562]; cytoplasm [GO:0005737]; cytoskeleton [GO:0005856]; cytosol [GO:0005829]; endoplasmic reticulum membrane [GO:0005789]; extracellular exosome [GO:0070062]; extracellular region [GO:0005576]; extracellular space [GO:0005615]; extracellular vesicle [GO:1903561]; focal adhesion [GO:0005925]; interle…	136000	182000	83400	113000	89500	126000	105000	169000	8	8	-0.0715818	0.90796	FALSE	10735.3	0.442778	0.0839698	FALSE	non significant	0.17803
629	447	P54819	AK2	ENSG00000004455:AK2	Adenylate kinase 2 mitochondrial OS=Homo sapiens OX=9606 GN=AK2 PE=1 SV=2	extracellular exosome [GO:0070062]; mitochondrial intermembrane space [GO:0005758]; sperm mitochondrial sheath [GO:0097226]	78900	102000	117000	115000	109000	105000	130000	111000	10	9	0.140074	0.463077	FALSE	8487.49	0.0761918	0.81023	FALSE	non significant	0.103308
549	359	A0FGR8	ESYT2	ENSG00000117868:ESYT2	Extended synaptotagmin-2 OS=Homo sapiens OX=9606 GN=ESYT2 PE=1 SV=1	endoplasmic reticulum membrane [GO:0005789]; endoplasmic reticulum-plasma membrane contact site [GO:0140268]; extrinsic component of cytoplasmic side of plasma membrane [GO:0031234]; integral component of plasma membrane [GO:0005887]; intrinsic component of endoplasmic reticulum membrane [GO:0031227]; membrane [GO:0016020]; organelle membrane contact site [GO:0044232]	77700	91900	89200	87600	79000	90000	86900	81000	12	12	-0.0401185	0.681576	FALSE	15077.8	-0.242064	0.403387	FALSE	non significant	0.0985457
689	340	Q5T2T1	MPP7	ENSG00000150054:MPP7	MAGUK p55 subfamily member 7 OS=Homo sapiens OX=9606 GN=MPP7 PE=1 SV=1	MPP7-DLG1-LIN7 complex [GO:0097025]; adherens junction [GO:0005912]; bicellular tight junction [GO:0005923]; cell junction [GO:0030054]; nucleoplasm [GO:0005654]	83700	91900	83700	82600	59600	61000	46100	48500	12	12	-0.667896	0.0267848	FALSE	4545.62	-1.58371	2.15843e-10	TRUE	significant by RNA only	1.02847
738	546	Q9BZF1	OSBPL8	ENSG00000091039:OSBPL8	Oxysterol-binding protein-related protein 8 OS=Homo sapiens OX=9606 GN=OSBPL8 PE=1 SV=3	cortical endoplasmic reticulum [GO:0032541]; cytosol [GO:0005829]; endoplasmic reticulum [GO:0005783]; endoplasmic reticulum membrane [GO:0005789]; integral component of membrane [GO:0016021]; intracellular membrane-bounded organelle [GO:0043231]; membrane [GO:0016020]; nuclear membrane [GO:0031965]	46700	50100	44600	48100	100000	94600	74300	65400	9	9	0.818946	0.0402713	FALSE	13520.3	-0.290447	0.144166	FALSE	non significant	0.487709
615	934	P84157	MXRA7	ENSG00000182534:MXRA7	Matrix-remodeling-associated protein 7 OS=Homo sapiens OX=9606 GN=MXRA7 PE=1 SV=1	collagen-containing extracellular matrix [GO:0062023]; integral component of membrane [GO:0016021]	39200	32000	39300	37400	66600	56400	34400	20500	5	5	0.266444	0.824285	FALSE	19851.8	-0.854063	0.000203704	FALSE	non significant	0.477033
699	458	Q86UU1	PHLDB1	ENSG00000019144:PHLDB1	Pleckstrin homology-like domain family B member 1 OS=Homo sapiens OX=9606 GN=PHLDB1 PE=1 SV=1	basal cortex [GO:0045180]	177000	173000	222000	186000	449000	394000	389000	238000	11	11	0.955546	0.0497609	FALSE	14681.3	-0.907472	1.18786e-05	FALSE	non significant	0.931199
667	376	O75165	DNAJC13	ENSG00000138246:DNAJC13	DnaJ homolog subfamily C member 13 OS=Homo sapiens OX=9606 GN=DNAJC13 PE=1 SV=5	azurophil granule membrane [GO:0035577]; cytosol [GO:0005829]; early endosome membrane [GO:0031901]; endosome membrane [GO:0010008]; extracellular exosome [GO:0070062]; intracellular membrane-bounded organelle [GO:0043231]; lysosomal membrane [GO:0005765]; membrane [GO:0016020]; plasma membrane [GO:0005886]; secretory granule membrane [GO:0030667]	118000	147000	120000	119000	141000	161000	155000	149000	12	12	0.265894	0.0798965	FALSE	11881.2	-0.133162	0.675104	FALSE	non significant	0.188168
610	464	Q9UBC2	EPS15L1	ENSG00000127527:EPS15L1	Epidermal growth factor receptor substrate 15-like 1 OS=Homo sapiens OX=9606 GN=EPS15L1 PE=1 SV=1	clathrin coat of coated pit [GO:0030132]; cytosol [GO:0005829]; membrane [GO:0016020]; nucleus [GO:0005634]; plasma membrane [GO:0005886]	89700	96200	82900	85000	108000	80900	70800	74500	9	9	-0.0822223	0.624536	FALSE	1437.7	-0.114876	0.795419	FALSE	non significant	0.0971874
425	414	P35908	KRT2	ENSG00000172867:KRT2	Keratin type II cytoskeletal 2 epidermal OS=Homo sapiens OX=9606 GN=KRT2 PE=1 SV=2	cornified envelope [GO:0001533]; cytosol [GO:0005829]; extracellular exosome [GO:0070062]; extracellular space [GO:0005615]; intermediate filament [GO:0005882]; keratin filament [GO:0045095]; membrane [GO:0016020]; nucleus [GO:0005634]	46500	49200	46300	63800	55400	58000	41300	48900	18	6	-0.0155054	0.951938	FALSE	0.22741	-0.0616557	NA	FALSE	non significant	0.0309192
399	791	P62263	RPS14	ENSG00000164587:RPS14	40S ribosomal protein S14 OS=Homo sapiens OX=9606 GN=RPS14 PE=1 SV=3	cytosol [GO:0005829]; cytosolic small ribosomal subunit [GO:0022627]; extracellular exosome [GO:0070062]; focal adhesion [GO:0005925]; membrane [GO:0016020]; nucleolus [GO:0005730]; nucleoplasm [GO:0005654]; postsynaptic density [GO:0014069]	115000	130000	111000	110000	196000	161000	162000	170000	10	10	0.564174	0.0119275	FALSE	34996.3	0.332857	0.573157	FALSE	non significant	0.433347
889	624	O14745	SLC9A3R1	ENSG00000109062:SLC9A3R1	Na(+)/H(+) exchange regulatory cofactor NHE-RF1 OS=Homo sapiens OX=9606 GN=SLC9A3R1 PE=1 SV=4	actin cytoskeleton [GO:0015629]; apical plasma membrane [GO:0016324]; brush border membrane [GO:0031526]; cell periphery [GO:0071944]; cytoplasm [GO:0005737]; endomembrane system [GO:0012505]; extracellular exosome [GO:0070062]; filopodium [GO:0030175]; membrane [GO:0016020]; membrane raft [GO:0045121]; microvillus [GO:0005902]; microvillus membrane [GO:0031528]; perinuclear region of cytoplasm […	49400	37300	51400	45500	20600	20800	16400	20000	5	5	-1.23872	0.00442599	TRUE	2117.18	-1.04857	0.00422236	TRUE	significantly consistently downregulated	1.13969
333	808	P11166	SLC2A1	ENSG00000117394:SLC2A1	Solute carrier family 2 facilitated glucose transporter member 1 OS=Homo sapiens OX=9606 GN=SLC2A1 PE=1 SV=2	Golgi membrane [GO:0000139]; Z disc [GO:0030018]; apical plasma membrane [GO:0016324]; basolateral plasma membrane [GO:0016323]; blood microparticle [GO:0072562]; caveola [GO:0005901]; cortical actin cytoskeleton [GO:0030864]; cytosol [GO:0005829]; extracellular exosome [GO:0070062]; female pronucleus [GO:0001939]; integral component of plasma membrane [GO:0005887]; intercalated disc [GO:0014704]…	218000	212000	163000	159000	170000	150000	118000	105000	9	9	-0.46978	0.12135	FALSE	6548.23	-0.463805	0.25173	FALSE	non significant	0.466783
796	599	O94874	UFL1	ENSG00000014123:UFL1	E3 UFM1-protein ligase 1 OS=Homo sapiens OX=9606 GN=UFL1 PE=1 SV=2	cytoplasm [GO:0005737]; cytosol [GO:0005829]; endoplasmic reticulum [GO:0005783]; endoplasmic reticulum membrane [GO:0005789]; membrane [GO:0016020]; neuron projection [GO:0043005]; protein-containing complex [GO:0032991]	96400	115000	106000	116000	114000	101000	82600	75500	10	10	-0.216137	0.293242	FALSE	3939.62	0.0650884	0.79407	FALSE	non significant	0.118609
529	390	P36776	LONP1	ENSG00000196365:LONP1	Lon protease homolog mitochondrial OS=Homo sapiens OX=9606 GN=LONP1 PE=1 SV=2	cytosol [GO:0005829]; membrane [GO:0016020]; mitochondrial matrix [GO:0005759]; mitochondrial nucleoid [GO:0042645]; mitochondrion [GO:0005739]; nucleoplasm [GO:0005654]; nucleus [GO:0005634]	123000	146000	181000	163000	207000	159000	142000	130000	14	14	0.0576694	0.861891	FALSE	11905.6	-0.300726	0.273759	FALSE	non significant	0.131692
279	668	P62750	RPL23A	ENSG00000198242:RPL23A	60S ribosomal protein L23a OS=Homo sapiens OX=9606 GN=RPL23A PE=1 SV=1	cytoplasm [GO:0005737]; cytosol [GO:0005829]; cytosolic large ribosomal subunit [GO:0022625]; extracellular exosome [GO:0070062]; nucleolus [GO:0005730]; nucleus [GO:0005634]	570000	561000	650000	543000	849000	679000	736000	560000	16	16	0.28113	0.208143	FALSE	28321.4	0.56398	0.200138	FALSE	non significant	0.398185
499	673	P62829	RPL23	ENSG00000125691:RPL23	60S ribosomal protein L23 OS=Homo sapiens OX=9606 GN=RPL23 PE=1 SV=1	cytoplasm [GO:0005737]; cytosol [GO:0005829]; cytosolic large ribosomal subunit [GO:0022625]; extracellular exosome [GO:0070062]; focal adhesion [GO:0005925]; membrane [GO:0016020]; nucleolus [GO:0005730]; nucleoplasm [GO:0005654]; postsynaptic density [GO:0014069]; protein-containing complex [GO:0032991]; ribosome [GO:0005840]	341000	374000	379000	340000	329000	358000	344000	300000	10	10	-0.107534	0.269932	FALSE	33193.5	0.27571	0.474601	FALSE	non significant	0.172187
225	685	P31949	S100A11	ENSG00000163191:S100A11	Protein S100-A11 OS=Homo sapiens OX=9606 GN=S100A11 PE=1 SV=2	cell-cell adherens junction [GO:0005913]; cytoplasm [GO:0005737]; extracellular exosome [GO:0070062]; extracellular region [GO:0005576]; extracellular space [GO:0005615]; nucleus [GO:0005634]; ruffle [GO:0001726]; secretory granule lumen [GO:0034774]	1210000	1450000	1540000	1660000	903000	1000000	948000	880000	17	17	-0.651338	0.02414	FALSE	7185.94	-0.0659572	0.953342	FALSE	non significant	0.207269
2256	2147	P50895	BCAM	ENSG00000187244:BCAM	Basal cell adhesion molecule OS=Homo sapiens OX=9606 GN=BCAM PE=1 SV=2	collagen-containing extracellular matrix [GO:0062023]; external side of plasma membrane [GO:0009897]; extracellular exosome [GO:0070062]; extracellular region [GO:0005576]; integral component of plasma membrane [GO:0005887]; plasma membrane [GO:0005886]	2340	1480	1780	1770	811.197	847.808	1090	655.376	1	1	-1.11427	0.0163891	TRUE	1349.04	1.16309	0.00647558	TRUE	inconsistently deregulated but significant in both	1.13842
447	344	P13591	NCAM1	ENSG00000149294:NCAM1	Neural cell adhesion molecule 1 OS=Homo sapiens OX=9606 GN=NCAM1 PE=1 SV=3	Golgi membrane [GO:0000139]; anchored component of membrane [GO:0031225]; cell surface [GO:0009986]; collagen-containing extracellular matrix [GO:0062023]; cytosol [GO:0005829]; external side of plasma membrane [GO:0009897]; integral component of membrane [GO:0016021]; membrane [GO:0016020]; plasma membrane [GO:0005886]	415000	430000	376000	346000	193000	206000	199000	203000	14	14	-0.968131	0.00949894	FALSE	8277.07	-0.182204	0.761298	FALSE	non significant	0.419997
695	1553	Q9NYM9	BET1L	ENSG00000177951:BET1L	BET1-like protein OS=Homo sapiens OX=9606 GN=BET1L PE=1 SV=1	Golgi apparatus [GO:0005794]; Golgi membrane [GO:0000139]; Golgi trans cisterna [GO:0000138]; SNARE complex [GO:0031201]; cytosol [GO:0005829]; endosome [GO:0005768]; integral component of Golgi membrane [GO:0030173]; membrane [GO:0016020]	76100	82100	64300	63100	114000	115000	85600	74800	6	6	0.447257	0.133167	FALSE	2572.72	-0.117778	0.613045	FALSE	non significant	0.229515
558	445	Q9Y6N7	ROBO1	ENSG00000169855:ROBO1	Roundabout homolog 1 OS=Homo sapiens OX=9606 GN=ROBO1 PE=1 SV=1	axon [GO:0030424]; cell surface [GO:0009986]; cytoplasm [GO:0005737]; endoplasmic reticulum-Golgi intermediate compartment membrane [GO:0033116]; integral component of plasma membrane [GO:0005887]; plasma membrane [GO:0005886]	160000	169000	127000	137000	117000	89700	93000	89000	11	11	-0.609375	0.0254679	FALSE	4073.78	0.894726	0.00737918	FALSE	non significant	0.738393
609	631	P13804	ETFA	ENSG00000140374:ETFA	Electron transfer flavoprotein subunit alpha mitochondrial OS=Homo sapiens OX=9606 GN=ETFA PE=1 SV=1	mitochondrial matrix [GO:0005759]; mitochondrion [GO:0005739]	85200	104000	127000	116000	108000	118000	141000	115000	9	9	0.157334	0.422172	FALSE	8001.13	-0.919112	0.000145808	FALSE	non significant	0.380273
444	372	O75976	CPD	ENSG00000108582:CPD	Carboxypeptidase D OS=Homo sapiens OX=9606 GN=CPD PE=1 SV=2	extracellular exosome [GO:0070062]; extracellular space [GO:0005615]; integral component of membrane [GO:0016021]; membrane [GO:0016020]; plasma membrane [GO:0005886]	329000	352000	239000	250000	399000	387000	371000	422000	14	14	0.432503	0.103051	FALSE	23113.1	0.198828	0.646609	FALSE	non significant	0.293247
635	479	P06396	GSN	ENSG00000148180:GSN	Gelsolin OS=Homo sapiens OX=9606 GN=GSN PE=1 SV=1	actin cap [GO:0030478]; actin cytoskeleton [GO:0015629]; blood microparticle [GO:0072562]; cortical actin cytoskeleton [GO:0030864]; cytoplasm [GO:0005737]; cytosol [GO:0005829]; extracellular exosome [GO:0070062]; extracellular region [GO:0005576]; extracellular space [GO:0005615]; ficolin-1-rich granule lumen [GO:1904813]; focal adhesion [GO:0005925]; lamellipodium [GO:0030027]; myelin sheath […	114000	119000	124000	123000	89900	114000	112000	142000	9	9	-0.0680018	0.665424	FALSE	19297.4	-0.0341577	0.933485	FALSE	non significant	0.0481953
300	509	P62070	RRAS2	ENSG00000133818:RRAS2	Ras-related protein R-Ras2 OS=Homo sapiens OX=9606 GN=RRAS2 PE=1 SV=1	endoplasmic reticulum [GO:0005783]; extracellular exosome [GO:0070062]; focal adhesion [GO:0005925]; membrane [GO:0016020]; plasma membrane [GO:0005886]	306000	339000	264000	255000	130000	145000	139000	162000	13	9	-1.01495	0.00667404	TRUE	4787.87	-1.2339	5.78782e-05	TRUE	significantly consistently downregulated	1.11908
628	513	O75489	NDUFS3	ENSG00000213619:NDUFS3	NADH dehydrogenase [ubiquinone] iron-sulfur protein 3 mitochondrial OS=Homo sapiens OX=9606 GN=NDUFS3 PE=1 SV=1	mitochondrial matrix [GO:0005759]; mitochondrial membrane [GO:0031966]; mitochondrial respiratory chain complex I [GO:0005747]; mitochondrion [GO:0005739]; nuclear body [GO:0016604]	139000	144000	153000	174000	195000	161000	181000	173000	11	11	0.21901	0.119839	FALSE	3715.46	-0.506474	0.00128833	FALSE	non significant	0.333051
718	905	Q9UMY4	SNX12	ENSG00000147164:SNX12	Sorting nexin-12 OS=Homo sapiens OX=9606 GN=SNX12 PE=1 SV=3	early endosome [GO:0005769]; membrane [GO:0016020]	20700	20300	19400	18300	13000	11900	18500	14300	7	4	-0.447792	0.0940302	FALSE	4444.35	-0.448727	0.0236215	FALSE	non significant	0.44826
436	352	P61160	ACTR2	ENSG00000138071:ACTR2	Actin-related protein 2 OS=Homo sapiens OX=9606 GN=ACTR2 PE=1 SV=1	Arp2/3 protein complex [GO:0005885]; actin cap [GO:0030478]; actin cortical patch [GO:0030479]; actin cytoskeleton [GO:0015629]; azurophil granule lumen [GO:0035578]; cytoplasm [GO:0005737]; cytosol [GO:0005829]; extracellular exosome [GO:0070062]; extracellular region [GO:0005576]; ficolin-1-rich granule lumen [GO:1904813]; focal adhesion [GO:0005925]; invadopodium [GO:0071437]; lamellipodium [G…	216000	187000	237000	273000	129000	138000	180000	176000	14	12	-0.551383	0.0564662	FALSE	23226.2	-0.660205	2.68024e-05	FALSE	non significant	0.603345
3854	4207	Q96Q06	PLIN4	ENSG00000167676:PLIN4	Perilipin-4 OS=Homo sapiens OX=9606 GN=PLIN4 PE=1 SV=2	cytosol [GO:0005829]; intracellular membrane-bounded organelle [GO:0043231]; lipid droplet [GO:0005811]; plasma membrane [GO:0005886]	11400	16400	13000	18300	7240	6560	5440	7690	1	1	-1.13394	0.0163355	TRUE	159.626	1.04368	0.00846398	TRUE	inconsistently deregulated but significant in both	1.08788
531	563	O95249	GOSR1	ENSG00000108587:GOSR1	Golgi SNAP receptor complex member 1 OS=Homo sapiens OX=9606 GN=GOSR1 PE=1 SV=1	Golgi apparatus [GO:0005794]; Golgi medial cisterna [GO:0005797]; Golgi membrane [GO:0000139]; SNARE complex [GO:0031201]; cis-Golgi network [GO:0005801]; cytosol [GO:0005829]; integral component of membrane [GO:0016021]; membrane [GO:0016020]; transport vesicle [GO:0030133]	103000	114000	97900	101000	332000	324000	155000	150000	14	14	1.2083	0.0951365	FALSE	3195.32	-0.218357	0.139941	FALSE	non significant	0.513654
8132	9242	Q8IYJ2	C10orf67	ENSG00000179133:C10orf67	Uncharacterized protein C10orf67 mitochondrial OS=Homo sapiens OX=9606 GN=C10orf67 PE=2 SV=3	mitochondrion [GO:0005739]	284.32	422.866	305.986	244.239	703.86	1040	900.906	1580	1	1	1.74842	0.0170262	TRUE	4.48096	3.91556	0.00390603	FALSE	significant by MS only	2.61649
658	843	P11177	PDHB	ENSG00000168291:PDHB	Pyruvate dehydrogenase E1 component subunit beta mitochondrial OS=Homo sapiens OX=9606 GN=PDHB PE=1 SV=3	mitochondrial matrix [GO:0005759]; mitochondrion [GO:0005739]; nucleoplasm [GO:0005654]; nucleus [GO:0005634]; pyruvate dehydrogenase complex [GO:0045254]	95000	98500	119000	104000	127000	117000	108000	95600	10	10	0.103894	0.509546	FALSE	8355.71	-0.900479	4.37729e-11	FALSE	non significant	0.305866
396	949	P62857	RPS28	ENSG00000233927:RPS28	40S ribosomal protein S28 OS=Homo sapiens OX=9606 GN=RPS28 PE=1 SV=1	cytoplasmic side of rough endoplasmic reticulum membrane [GO:0098556]; cytosol [GO:0005829]; cytosolic small ribosomal subunit [GO:0022627]; extracellular exosome [GO:0070062]; nucleoplasm [GO:0005654]; polysomal ribosome [GO:0042788]; small ribosomal subunit [GO:0015935]	399000	444000	373000	394000	635000	557000	563000	501000	10	10	0.486706	0.0171659	FALSE	6679.67	0.154226	0.703582	FALSE	non significant	0.273976
677	386	O95202	LETM1	ENSG00000168924:LETM1	Mitochondrial proton/calcium exchanger protein OS=Homo sapiens OX=9606 GN=LETM1 PE=1 SV=1	integral component of membrane [GO:0016021]; mitochondrial inner membrane [GO:0005743]; mitochondrion [GO:0005739]	99800	94800	119000	106000	150000	148000	155000	140000	13	13	0.499017	0.0199739	FALSE	7690.54	-0.139548	0.609334	FALSE	non significant	0.263888
1245	2832	Q9C075	KRT23	ENSG00000108244:KRT23	Keratin type I cytoskeletal 23 OS=Homo sapiens OX=9606 GN=KRT23 PE=1 SV=2	cytosol [GO:0005829]; intermediate filament [GO:0005882]	91800	67600	54200	95200	414000	362000	533000	602000	1	1	2.62958	0.00387413	TRUE	19.3129	2.39959	6.78952e-06	FALSE	significant by MS only	2.51196
567	579	Q12846	STX4	ENSG00000103496:STX4	Syntaxin-4 OS=Homo sapiens OX=9606 GN=STX4 PE=1 SV=2	SNARE complex [GO:0031201]; basolateral plasma membrane [GO:0016323]; cell surface [GO:0009986]; cytosol [GO:0005829]; dendritic spine [GO:0043197]; endomembrane system [GO:0012505]; endosome [GO:0005768]; extracellular exosome [GO:0070062]; extracellular space [GO:0005615]; glutamatergic synapse [GO:0098978]; integral component of membrane [GO:0016021]; lamellipodium [GO:0030027]; lateral loop […	222000	224000	179000	176000	164000	180000	137000	154000	12	12	-0.335046	0.0960815	FALSE	2993.13	0.37061	0.262193	FALSE	non significant	0.35238
808	658	P13861	PRKAR2A	ENSG00000114302:PRKAR2A	cAMP-dependent protein kinase type II-alpha regulatory subunit OS=Homo sapiens OX=9606 GN=PRKAR2A PE=1 SV=2	cAMP-dependent protein kinase complex [GO:0005952]; centrosome [GO:0005813]; ciliary base [GO:0097546]; cytoplasm [GO:0005737]; cytosol [GO:0005829]; extracellular exosome [GO:0070062]; focal adhesion [GO:0005925]; membrane [GO:0016020]; nucleotide-activated protein kinase complex [GO:0031588]; plasma membrane [GO:0005886]; plasma membrane raft [GO:0044853]; protein-containing complex [GO:0032991]	40900	45800	38200	35400	38100	46800	55200	68500	9	9	0.379965	0.238447	FALSE	4123.36	-0.362928	0.0756424	FALSE	non significant	0.371349
452	702	Q9HC07	TMEM165	ENSG00000134851:TMEM165	Transmembrane protein 165 OS=Homo sapiens OX=9606 GN=TMEM165 PE=1 SV=1	Golgi apparatus [GO:0005794]; early endosome membrane [GO:0031901]; endosome membrane [GO:0010008]; integral component of membrane [GO:0016021]; intracellular membrane-bounded organelle [GO:0043231]; late endosome membrane [GO:0031902]; lysosomal membrane [GO:0005765]; trans-Golgi network membrane [GO:0032588]	307000	272000	231000	316000	477000	422000	375000	361000	11	11	0.538084	0.0364804	FALSE	11101.3	-1.11106	8.83515e-05	TRUE	significant by RNA only	0.773202
485	653	Q9UBS4	DNAJB11	ENSG00000090520:DNAJB11	DnaJ homolog subfamily B member 11 OS=Homo sapiens OX=9606 GN=DNAJB11 PE=1 SV=1	endoplasmic reticulum [GO:0005783]; endoplasmic reticulum lumen [GO:0005788]; membrane [GO:0016020]	77600	85000	102000	86700	159000	143000	113000	93500	8	8	0.533544	0.114656	FALSE	8716.77	-0.80279	0.000653711	FALSE	non significant	0.654465
626	615	Q9Y6M7	SLC4A7	ENSG00000033867:SLC4A7	Sodium bicarbonate cotransporter 3 OS=Homo sapiens OX=9606 GN=SLC4A7 PE=1 SV=2	apical plasma membrane [GO:0016324]; basolateral plasma membrane [GO:0016323]; cytoplasmic vesicle [GO:0031410]; integral component of membrane [GO:0016021]; integral component of plasma membrane [GO:0005887]; plasma membrane [GO:0005886]; stereocilium [GO:0032420]; synapse [GO:0045202]	81300	85400	71500	69700	57600	62500	61100	67400	8	6	-0.308636	0.0528032	FALSE	14847.5	1.11039	1.29898e-06	TRUE	significant by RNA only	0.58541
700	412	Q9NTJ5	SACM1L	ENSG00000211456:SACM1L	Phosphatidylinositide phosphatase SAC1 OS=Homo sapiens OX=9606 GN=SACM1L PE=1 SV=2	AMPA glutamate receptor complex [GO:0032281]; Golgi apparatus [GO:0005794]; Golgi membrane [GO:0000139]; endoplasmic reticulum [GO:0005783]; endoplasmic reticulum membrane [GO:0005789]; integral component of endoplasmic reticulum membrane [GO:0030176]	117000	137000	101000	124000	170000	148000	128000	160000	10	10	0.339292	0.0931647	FALSE	3560.68	-0.283353	0.104066	FALSE	non significant	0.310063
1766	3148	Q6XR72	SLC30A10	ENSG00000196660:SLC30A10	Zinc transporter 10 OS=Homo sapiens OX=9606 GN=SLC30A10 PE=1 SV=2	Golgi apparatus [GO:0005794]; early endosome [GO:0005769]; integral component of membrane [GO:0016021]; plasma membrane [GO:0005886]; recycling endosome [GO:0055037]	6650	10600	8790	9000	1640	1980	1350	418.295	1	1	-2.7011	0.0366973	TRUE	10.7139	1.76295	0.212128	FALSE	significant by MS only	2.18218
735	443	O75146	HIP1R	ENSG00000130787:HIP1R	Huntingtin-interacting protein 1-related protein OS=Homo sapiens OX=9606 GN=HIP1R PE=1 SV=2	actin cortical patch [GO:0030479]; apical plasma membrane [GO:0016324]; clathrin-coated pit [GO:0005905]; clathrin-coated vesicle [GO:0030136]; clathrin-coated vesicle membrane [GO:0030665]; cytosol [GO:0005829]; dendrite cytoplasm [GO:0032839]; dendritic spine [GO:0043197]; intracellular membrane-bounded organelle [GO:0043231]; mitochondrion [GO:0005739]; neuronal cell body [GO:0043025]; perinuc…	108000	111000	108000	119000	81600	91200	76200	73900	13	13	-0.465956	0.0194314	FALSE	8131.38	-0.850896	0.00034781	FALSE	non significant	0.629667
320	800	Q9Y281	CFL2	ENSG00000165410:CFL2	Cofilin-2 OS=Homo sapiens OX=9606 GN=CFL2 PE=1 SV=1	I band [GO:0031674]; Z disc [GO:0030018]; actin cytoskeleton [GO:0015629]; extracellular exosome [GO:0070062]; extracellular space [GO:0005615]; nuclear matrix [GO:0016363]	39400	46600	50900	58500	34100	39600	61900	47200	11	2	-0.0961644	0.705289	FALSE	10456.7	-1.59553	5.13163e-14	TRUE	significant by RNA only	0.391706
678	392	Q15437	SEC23B	ENSG00000101310:SEC23B	Protein transport protein Sec23B OS=Homo sapiens OX=9606 GN=SEC23B PE=1 SV=2	COPII vesicle coat [GO:0030127]; Golgi membrane [GO:0000139]; cytosol [GO:0005829]; endomembrane system [GO:0012505]; endoplasmic reticulum [GO:0005783]; endoplasmic reticulum exit site [GO:0070971]; endoplasmic reticulum membrane [GO:0005789]; perinuclear region of cytoplasm [GO:0048471]	54600	63200	46600	53700	58700	49800	53200	57700	10	7	0.00857376	0.933976	FALSE	5521.38	-0.278838	0.1563	FALSE	non significant	0.0488946
528	491	P18206	VCL	ENSG00000035403:VCL	Vinculin OS=Homo sapiens OX=9606 GN=VCL PE=1 SV=4	adherens junction [GO:0005912]; brush border [GO:0005903]; cell [GO:0005623]; cell-cell adherens junction [GO:0005913]; cell-cell junction [GO:0005911]; cell-substrate junction [GO:0030055]; costamere [GO:0043034]; cytoskeleton [GO:0005856]; cytosol [GO:0005829]; extracellular exosome [GO:0070062]; extracellular region [GO:0005576]; extracellular vesicle [GO:1903561]; fascia adherens [GO:0005916]…	140000	156000	169000	170000	125000	135000	121000	127000	13	13	-0.321928	0.0406407	FALSE	48566.2	-0.409816	0.221491	FALSE	non significant	0.363224
949	649	Q02218	OGDH	ENSG00000105953:OGDH	2-oxoglutarate dehydrogenase mitochondrial OS=Homo sapiens OX=9606 GN=OGDH PE=1 SV=3	mitochondrial matrix [GO:0005759]; mitochondrial membrane [GO:0031966]; mitochondrion [GO:0005739]; nucleus [GO:0005634]; oxoglutarate dehydrogenase complex [GO:0045252]	16400	20900	21200	19300	29000	29800	34300	28000	7	7	0.638357	0.0148827	FALSE	7504.52	-0.167051	0.471337	FALSE	non significant	0.326555
802	533	Q9HBR0	SLC38A10	ENSG00000157637:SLC38A10	Putative sodium-coupled neutral amino acid transporter 10 OS=Homo sapiens OX=9606 GN=SLC38A10 PE=1 SV=2	Golgi apparatus [GO:0005794]; integral component of membrane [GO:0016021]	73000	61900	46600	43800	82700	86800	61800	49100	9	9	0.315639	0.383678	FALSE	14462	0.0513631	0.898137	FALSE	non significant	0.127327
375	568	Q12931	TRAP1	ENSG00000126602:TRAP1	Heat shock protein 75 kDa mitochondrial OS=Homo sapiens OX=9606 GN=TRAP1 PE=1 SV=3	membrane [GO:0016020]; mitochondrial inner membrane [GO:0005743]; mitochondrial intermembrane space [GO:0005758]; mitochondrial matrix [GO:0005759]; mitochondrion [GO:0005739]; nucleoplasm [GO:0005654]	80000	89900	113000	116000	111000	72300	103000	81200	13	8	-0.118283	0.647665	FALSE	4681.89	0.582545	0.0250303	FALSE	non significant	0.262498
631	515	Q9BYC5	FUT8	ENSG00000033170:FUT8	Alpha-(1 6)-fucosyltransferase OS=Homo sapiens OX=9606 GN=FUT8 PE=1 SV=2	Golgi apparatus [GO:0005794]; Golgi cisterna membrane [GO:0032580]; Golgi membrane [GO:0000139]; cytosol [GO:0005829]; extracellular exosome [GO:0070062]; integral component of membrane [GO:0016021]; membrane [GO:0016020]	71700	75100	66700	66600	139000	182000	105000	112000	9	9	0.941664	0.0470835	FALSE	3924.24	-0.661276	0.00113267	FALSE	non significant	0.789113
492	473	P09382	LGALS1	ENSG00000100097:LGALS1	Galectin-1 OS=Homo sapiens OX=9606 GN=LGALS1 PE=1 SV=2	cell surface [GO:0009986]; collagen-containing extracellular matrix [GO:0062023]; cytoplasm [GO:0005737]; cytosol [GO:0005829]; endoplasmic reticulum lumen [GO:0005788]; extracellular exosome [GO:0070062]; extracellular region [GO:0005576]; extracellular space [GO:0005615]; intracellular [GO:0005622]; nucleus [GO:0005634]	341000	317000	347000	359000	372000	494000	354000	419000	11	11	0.264972	0.175779	FALSE	76087.9	0.144024	0.762956	FALSE	non significant	0.195352
534	384	P08779	KRT16	ENSG00000186832:KRT16	Keratin type I cytoskeletal 16 OS=Homo sapiens OX=9606 GN=KRT16 PE=1 SV=4	cytoskeleton [GO:0005856]; cytosol [GO:0005829]; extracellular exosome [GO:0070062]; intermediate filament [GO:0005882]; nucleus [GO:0005634]	99400	49700	28900	57000	54300	56900	42500	50800	12	4	-0.20056	0.905322	FALSE	7.32037	-1.91278	0.00176698	FALSE	non significant	0.619377
608	475	Q92805	GOLGA1	ENSG00000136935:GOLGA1	Golgin subfamily A member 1 OS=Homo sapiens OX=9606 GN=GOLGA1 PE=1 SV=3	Golgi apparatus [GO:0005794]; Golgi membrane [GO:0000139]; acrosomal vesicle [GO:0001669]; cytosol [GO:0005829]; perinuclear region of cytoplasm [GO:0048471]; trans-Golgi network [GO:0005802]	96500	132000	108000	110000	165000	171000	164000	167000	11	11	0.579027	0.0355347	FALSE	2143.11	0.0728222	0.611509	FALSE	non significant	0.205344
290	708	P61020	RAB5B	ENSG00000111540:RAB5B	Ras-related protein Rab-5B OS=Homo sapiens OX=9606 GN=RAB5B PE=1 SV=1	anchored component of synaptic vesicle membrane [GO:0098993]; early endosome [GO:0005769]; early endosome membrane [GO:0031901]; endocytic vesicle [GO:0030139]; endosome [GO:0005768]; extracellular exosome [GO:0070062]; intracellular [GO:0005622]; intracellular membrane-bounded organelle [GO:0043231]; melanosome [GO:0042470]; membrane [GO:0016020]; plasma membrane [GO:0005886]; secretory granule …	66200	63200	60100	61900	99600	91900	81400	76100	13	3	0.473242	0.0390244	FALSE	5803.4	-0.473892	0.0646418	FALSE	non significant	0.473567
685	605	P52594	AGFG1	ENSG00000173744:AGFG1	Arf-GAP domain and FG repeat-containing protein 1 OS=Homo sapiens OX=9606 GN=AGFG1 PE=1 SV=2	cell projection [GO:0042995]; cytoplasmic vesicle [GO:0031410]; cytosol [GO:0005829]; intracellular membrane-bounded organelle [GO:0043231]; neuronal cell body [GO:0043025]; nuclear pore [GO:0005643]	134000	149000	124000	141000	111000	86900	106000	105000	8	8	-0.422428	0.0309888	FALSE	6249.78	-0.505759	0.024778	FALSE	non significant	0.462219
568	758	P67809	YBX1	ENSG00000065978:YBX1	Nuclease-sensitive element-binding protein 1 OS=Homo sapiens OX=9606 GN=YBX1 PE=1 SV=3	CRD-mediated mRNA stability complex [GO:0070937]; U12-type spliceosomal complex [GO:0005689]; cytoplasm [GO:0005737]; cytoplasmic stress granule [GO:0010494]; cytosol [GO:0005829]; extracellular exosome [GO:0070062]; extracellular region [GO:0005576]; histone pre-mRNA 3'end processing complex [GO:0071204]; intracellular membrane-bounded organelle [GO:0043231]; nuclear membrane [GO:0031965]; nucle…	37700	38100	42700	37700	88200	57300	50800	37400	6	5	0.581263	0.231213	FALSE	32318.3	-0.179232	0.660271	FALSE	non significant	0.322771
786	951	O14773	TPP1	ENSG00000166340:TPP1	Tripeptidyl-peptidase 1 OS=Homo sapiens OX=9606 GN=TPP1 PE=1 SV=2	extracellular exosome [GO:0070062]; lysosomal lumen [GO:0043202]; lysosome [GO:0005764]; melanosome [GO:0042470]	79000	95100	73100	72900	53600	45400	53800	53600	7	7	-0.63308	0.0171031	FALSE	2822.96	1.25122	0.00619031	TRUE	significant by RNA only	0.890011
655	472	O15439	ABCC4	ENSG00000125257:ABCC4	Multidrug resistance-associated protein 4 OS=Homo sapiens OX=9606 GN=ABCC4 PE=1 SV=3	basolateral plasma membrane [GO:0016323]; integral component of membrane [GO:0016021]; membrane [GO:0016020]; plasma membrane [GO:0005886]; platelet dense granule membrane [GO:0031088]	120000	128000	117000	105000	82900	113000	95300	101000	11	10	-0.261071	0.128308	FALSE	4602.08	0.9644	2.30879e-08	FALSE	non significant	0.501774
352	676	P60953	CDC42	ENSG00000070831:CDC42	Cell division control protein 42 homolog OS=Homo sapiens OX=9606 GN=CDC42 PE=1 SV=2	Golgi membrane [GO:0000139]; Golgi transport complex [GO:0017119]; cell cortex [GO:0005938]; cell projection [GO:0042995]; cytoplasm [GO:0005737]; cytoplasmic ribonucleoprotein granule [GO:0036464]; cytosol [GO:0005829]; dendritic spine [GO:0043197]; endoplasmic reticulum membrane [GO:0005789]; extracellular exosome [GO:0070062]; filopodium [GO:0030175]; focal adhesion [GO:0005925]; membrane [GO:…	321000	314000	355000	351000	390000	456000	442000	438000	15	14	0.364123	0.016576	FALSE	26755.9	-0.322545	0.14448	FALSE	non significant	0.342704
563	603	O15126	SCAMP1	ENSG00000085365:SCAMP1	Secretory carrier-associated membrane protein 1 OS=Homo sapiens OX=9606 GN=SCAMP1 PE=1 SV=2	Golgi apparatus [GO:0005794]; Golgi membrane [GO:0000139]; clathrin-coated vesicle [GO:0030136]; integral component of membrane [GO:0016021]; plasma membrane [GO:0005886]; recycling endosome membrane [GO:0055038]; specific granule membrane [GO:0035579]; synaptic vesicle membrane [GO:0030672]; trans-Golgi network [GO:0005802]; trans-Golgi network membrane [GO:0032588]; zymogen granule membrane [GO…	114000	117000	80600	115000	128000	77700	93000	96100	9	9	-0.111762	0.662844	FALSE	8097.35	-0.199137	0.405378	FALSE	non significant	0.149184
477	1187	Q9UBC5	MYO1A	ENSG00000166866:MYO1A	Unconventional myosin-Ia OS=Homo sapiens OX=9606 GN=MYO1A PE=2 SV=1	apical plasma membrane [GO:0016324]; basal plasma membrane [GO:0009925]; basolateral plasma membrane [GO:0016323]; brush border [GO:0005903]; cortical actin cytoskeleton [GO:0030864]; cytoplasm [GO:0005737]; filamentous actin [GO:0031941]; lateral plasma membrane [GO:0016328]; microvillus [GO:0005902]; myosin complex [GO:0016459]; plasma membrane raft [GO:0044853]	38000	36300	22800	32100	17900	19800	12900	18100	10	2	-0.911224	0.0324125	FALSE	6.54047	1.07984	0.394123	FALSE	non significant	0.991958
229	511	P51153	RAB13	ENSG00000143545:RAB13	Ras-related protein Rab-13 OS=Homo sapiens OX=9606 GN=RAB13 PE=1 SV=1	bicellular tight junction [GO:0005923]; cell junction [GO:0030054]; cytoplasmic vesicle [GO:0031410]; cytoplasmic vesicle membrane [GO:0030659]; cytosol [GO:0005829]; endocytic vesicle [GO:0030139]; extracellular exosome [GO:0070062]; insulin-responsive compartment [GO:0032593]; lamellipodium [GO:0030027]; lateral plasma membrane [GO:0016328]; neuron projection [GO:0043005]; plasma membrane [GO:0…	96700	97200	79500	92100	79500	72800	152000	162000	14	7	0.351387	0.556299	FALSE	2439.44	1.08597	0.000185868	TRUE	significant by RNA only	0.617734
2517	3839	O43315	AQP9	ENSG00000103569:AQP9	Aquaporin-9 OS=Homo sapiens OX=9606 GN=AQP9 PE=2 SV=2	basolateral plasma membrane [GO:0016323]; integral component of membrane [GO:0016021]; integral component of plasma membrane [GO:0005887]; intracellular membrane-bounded organelle [GO:0043231]; plasma membrane [GO:0005886]	4800	4420	3970	5160	2100	1730	998.653	820.284	1	1	-1.69973	0.0390244	TRUE	1.94934	2.70106	0.0797101	FALSE	significant by MS only	2.14268
708	569	P60174	TPI1	ENSG00000111669:TPI1	Triosephosphate isomerase OS=Homo sapiens OX=9606 GN=TPI1 PE=1 SV=3	cytosol [GO:0005829]; extracellular exosome [GO:0070062]; extracellular space [GO:0005615]; nucleus [GO:0005634]	110000	108000	161000	168000	91800	98500	123000	119000	9	9	-0.339508	0.272731	FALSE	41644.6	-0.116973	0.798952	FALSE	non significant	0.199282
674	665	Q15404	RSU1	ENSG00000148484:RSU1	Ras suppressor protein 1 OS=Homo sapiens OX=9606 GN=RSU1 PE=1 SV=3	cytosol [GO:0005829]; extracellular exosome [GO:0070062]; focal adhesion [GO:0005925]	151000	170000	186000	201000	78400	92700	106000	105000	9	9	-0.889799	0.0112371	FALSE	5994.71	-1.00396	3.30726e-06	TRUE	significant by RNA only	0.94516
541	786	P04792	HSPB1	ENSG00000106211:HSPB1	Heat shock protein beta-1 OS=Homo sapiens OX=9606 GN=HSPB1 PE=1 SV=2	Z disc [GO:0030018]; axon cytoplasm [GO:1904115]; cytoplasm [GO:0005737]; cytoskeleton [GO:0005856]; cytosol [GO:0005829]; extracellular exosome [GO:0070062]; extracellular space [GO:0005615]; focal adhesion [GO:0005925]; nucleus [GO:0005634]; plasma membrane [GO:0005886]; proteasome complex [GO:0000502]; spindle [GO:0005819]	131000	130000	149000	141000	128000	125000	117000	126000	8	8	-0.151712	0.0983239	FALSE	12346	-0.7622	0.00934853	FALSE	non significant	0.340052
402	420	P13645	KRT10	ENSG00000186395:KRT10	Keratin type I cytoskeletal 10 OS=Homo sapiens OX=9606 GN=KRT10 PE=1 SV=6	cell surface [GO:0009986]; cornified envelope [GO:0001533]; cytoplasm [GO:0005737]; cytosol [GO:0005829]; extracellular exosome [GO:0070062]; extracellular space [GO:0005615]; intermediate filament [GO:0005882]; membrane [GO:0016020]; nucleus [GO:0005634]	173000	140000	112000	250000	206000	177000	180000	174000	13	9	0.126777	0.603644	FALSE	1084.68	-0.615218	0.115714	FALSE	non significant	0.279277
753	698	P52907	CAPZA1	ENSG00000116489:CAPZA1	F-actin-capping protein subunit alpha-1 OS=Homo sapiens OX=9606 GN=CAPZA1 PE=1 SV=3	F-actin capping protein complex [GO:0008290]; WASH complex [GO:0071203]; actin cortical patch [GO:0030479]; actin cytoskeleton [GO:0015629]; cytoskeleton [GO:0005856]; cytosol [GO:0005829]; extracellular exosome [GO:0070062]; extracellular region [GO:0005576]	46600	50000	46700	60700	52400	48400	56600	47900	6	5	0.00916448	0.931093	FALSE	18739.8	-0.30906	0.161789	FALSE	non significant	0.05322
779	900	Q13492	PICALM	ENSG00000073921:PICALM	Phosphatidylinositol-binding clathrin assembly protein OS=Homo sapiens OX=9606 GN=PICALM PE=1 SV=2	Golgi apparatus [GO:0005794]; cell surface [GO:0009986]; clathrin-coated endocytic vesicle [GO:0045334]; clathrin-coated pit [GO:0005905]; clathrin-coated vesicle [GO:0030136]; cytosol [GO:0005829]; early endosome [GO:0005769]; endosome to plasma membrane transport vesicle [GO:0070381]; extrinsic component of presynaptic endocytic zone membrane [GO:0098894]; intracellular membrane-bounded organel…	182000	177000	158000	168000	114000	134000	110000	113000	7	7	-0.540377	0.0120638	FALSE	22178.5	-0.824744	6.44946e-05	FALSE	non significant	0.667587
657	584	Q14257	RCN2	ENSG00000117906:RCN2	Reticulocalbin-2 OS=Homo sapiens OX=9606 GN=RCN2 PE=1 SV=1	endoplasmic reticulum [GO:0005783]; endoplasmic reticulum lumen [GO:0005788]; nucleolus [GO:0005730]	141000	166000	170000	155000	200000	203000	232000	237000	11	11	0.464404	0.0171659	FALSE	9232.76	-1.00524	2.06347e-05	TRUE	significant by RNA only	0.683255
725	396	P22570	FDXR	ENSG00000161513:FDXR	NADPH:adrenodoxin oxidoreductase mitochondrial OS=Homo sapiens OX=9606 GN=FDXR PE=1 SV=3	mitochondrial inner membrane [GO:0005743]; mitochondrial matrix [GO:0005759]; mitochondrion [GO:0005739]	45400	54500	69100	60900	71700	46800	97700	72300	11	11	0.327565	0.403985	FALSE	2887.85	0.925042	0.22972	FALSE	non significant	0.550464
613	508	P05783	KRT18	ENSG00000111057:KRT18	Keratin type I cytoskeletal 18 OS=Homo sapiens OX=9606 GN=KRT18 PE=1 SV=2	cell periphery [GO:0071944]; cell-cell adherens junction [GO:0005913]; centriolar satellite [GO:0034451]; cytoplasm [GO:0005737]; cytosol [GO:0005829]; extracellular exosome [GO:0070062]; intermediate filament [GO:0005882]; keratin filament [GO:0045095]; microtubule organizing center [GO:0005815]; nucleolus [GO:0005730]; perinuclear region of cytoplasm [GO:0048471]	141000	144000	129000	161000	131000	88000	86500	87400	11	10	-0.5494	0.0668929	FALSE	8733.4	0.265774	0.650022	FALSE	non significant	0.382121
702	548	O00754	MAN2B1	ENSG00000104774:MAN2B1	Lysosomal alpha-mannosidase OS=Homo sapiens OX=9606 GN=MAN2B1 PE=1 SV=3	azurophil granule lumen [GO:0035578]; extracellular exosome [GO:0070062]; extracellular region [GO:0005576]; extracellular space [GO:0005615]; lysosomal lumen [GO:0043202]; vacuolar membrane [GO:0005774]	50600	51100	57700	53000	44900	49700	68500	66100	10	10	0.109823	0.697971	FALSE	5001.7	0.343686	0.241535	FALSE	non significant	0.19428
1181	1613	Q9NXN4	GDAP2	ENSG00000196505:GDAP2	Ganglioside-induced differentiation-associated protein 2 OS=Homo sapiens OX=9606 GN=GDAP2 PE=1 SV=1	lysosomal membrane [GO:0005765]	0	7	0	0	1740	2520	1750	1280	2	1	10.0243	0.0101945	TRUE	3981.99	0.415264	0.0581467	FALSE	significant by MS only	2.04028
720	593	Q9Y6M5	SLC30A1	ENSG00000170385:SLC30A1	Zinc transporter 1 OS=Homo sapiens OX=9606 GN=SLC30A1 PE=1 SV=3	Golgi apparatus [GO:0005794]; Schaffer collateral - CA1 synapse [GO:0098685]; T-tubule [GO:0030315]; cytoplasm [GO:0005737]; endoplasmic reticulum [GO:0005783]; integral component of postsynaptic density membrane [GO:0099061]; nuclear membrane [GO:0031965]; plasma membrane [GO:0005886]	69700	68900	57100	54700	79100	70700	67100	69500	8	8	0.193797	0.204213	FALSE	6566.99	0.22811	0.424617	FALSE	non significant	0.210255
536	660	Q13884	SNTB1	ENSG00000172164:SNTB1	Beta-1-syntrophin OS=Homo sapiens OX=9606 GN=SNTB1 PE=1 SV=3	cytoplasm [GO:0005737]; cytoskeleton [GO:0005856]; dystrophin-associated glycoprotein complex [GO:0016010]; focal adhesion [GO:0005925]; protein-containing complex [GO:0032991]; sarcolemma [GO:0042383]; synapse [GO:0045202]	108000	108000	82500	85300	63700	69400	53600	46000	8	5	-0.721884	0.0309888	FALSE	767.86	-0.376135	0.584678	FALSE	non significant	0.521081
442	1548	P04216	THY1	ENSG00000154096:THY1	Thy-1 membrane glycoprotein OS=Homo sapiens OX=9606 GN=THY1 PE=1 SV=2	anchored component of external side of plasma membrane [GO:0031362]; apical plasma membrane [GO:0016324]; axolemma [GO:0030673]; cell surface [GO:0009986]; cytosol [GO:0005829]; dendrite [GO:0030425]; dendrite membrane [GO:0032590]; endoplasmic reticulum [GO:0005783]; external side of plasma membrane [GO:0009897]; extracellular exosome [GO:0070062]; extracellular region [GO:0005576]; focal adhesi…	521000	555000	436000	407000	364000	350000	289000	351000	10	10	-0.503127	0.042284	FALSE	26381.3	-0.479274	0.240299	FALSE	non significant	0.491056
518	522	Q53GQ0	HSD17B12	ENSG00000149084:HSD17B12	Very-long-chain 3-oxoacyl-CoA reductase OS=Homo sapiens OX=9606 GN=HSD17B12 PE=1 SV=2	endoplasmic reticulum membrane [GO:0005789]; extracellular matrix [GO:0031012]; integral component of membrane [GO:0016021]	323000	352000	371000	355000	471000	457000	443000	451000	14	14	0.379066	0.0134002	FALSE	8963.7	-0.388023	0.380105	FALSE	non significant	0.383518
747	582	O00151	PDLIM1	ENSG00000107438:PDLIM1	PDZ and LIM domain protein 1 OS=Homo sapiens OX=9606 GN=PDLIM1 PE=1 SV=4	Z disc [GO:0030018]; cell-cell adherens junction [GO:0005913]; filamentous actin [GO:0031941]; focal adhesion [GO:0005925]; stress fiber [GO:0001725]; transcription factor complex [GO:0005667]	69900	72700	59700	76100	49600	58800	47000	55500	7	7	-0.4006	0.0396849	FALSE	2532.88	-0.695506	0.109486	FALSE	non significant	0.527845
761	471	O14974	PPP1R12A	ENSG00000058272:PPP1R12A	Protein phosphatase 1 regulatory subunit 12A OS=Homo sapiens OX=9606 GN=PPP1R12A PE=1 SV=1	A band [GO:0031672]; PTW/PP1 phosphatase complex [GO:0072357]; Z disc [GO:0030018]; actin cytoskeleton [GO:0015629]; centrosome [GO:0005813]; contractile fiber [GO:0043292]; cytoplasm [GO:0005737]; cytosol [GO:0005829]; focal adhesion [GO:0005925]; kinetochore [GO:0000776]; nucleoplasm [GO:0005654]	128000	129000	122000	123000	99700	88500	83300	97700	11	11	-0.443285	0.0222108	FALSE	12372.1	-0.532092	0.000292088	FALSE	non significant	0.485663
659	469	Q9Y678	COPG1	ENSG00000181789:COPG1	Coatomer subunit gamma-1 OS=Homo sapiens OX=9606 GN=COPG1 PE=1 SV=1	COPI vesicle coat [GO:0030126]; Golgi apparatus [GO:0005794]; Golgi membrane [GO:0000139]; cytosol [GO:0005829]; endoplasmic reticulum [GO:0005783]; endoplasmic reticulum membrane [GO:0005789]; endoplasmic reticulum-Golgi intermediate compartment [GO:0005793]; membrane [GO:0016020]; transport vesicle [GO:0030133]	46700	59800	51300	57300	62800	65400	54200	58000	10	10	0.160429	0.257466	FALSE	19410.1	-0.303918	0.138667	FALSE	non significant	0.220811
462	1140	Q15836	VAMP3	ENSG00000049245:VAMP3	Vesicle-associated membrane protein 3 OS=Homo sapiens OX=9606 GN=VAMP3 PE=1 SV=3	SNARE complex [GO:0031201]; apical plasma membrane [GO:0016324]; cell junction [GO:0030054]; cell surface [GO:0009986]; clathrin-coated vesicle [GO:0030136]; clathrin-coated vesicle membrane [GO:0030665]; cytosol [GO:0005829]; integral component of membrane [GO:0016021]; integral component of synaptic vesicle membrane [GO:0030285]; intracellular membrane-bounded organelle [GO:0043231]; neuron pro…	34100	39900	29100	32400	36800	38300	38300	38500	8	2	0.164829	0.26114	FALSE	8334.46	-0.328025	0.303692	FALSE	non significant	0.232525
483	661	Q04917	YWHAH	ENSG00000128245:YWHAH	14-3-3 protein eta OS=Homo sapiens OX=9606 GN=YWHAH PE=1 SV=4	cytoplasm [GO:0005737]; cytosol [GO:0005829]; extracellular exosome [GO:0070062]; intercalated disc [GO:0014704]; mitochondrion [GO:0005739]; plasma membrane [GO:0005886]	76100	79100	70000	82100	86400	82200	81100	83200	9	4	0.115441	0.174568	FALSE	9237.49	-0.818545	0.000462402	FALSE	non significant	0.307398
407	903	Q7Z7H5	TMED4	ENSG00000158604:TMED4	Transmembrane emp24 domain-containing protein 4 OS=Homo sapiens OX=9606 GN=TMED4 PE=1 SV=1	COPII-coated ER to Golgi transport vesicle [GO:0030134]; Golgi apparatus [GO:0005794]; endoplasmic reticulum [GO:0005783]; endoplasmic reticulum membrane [GO:0005789]; endoplasmic reticulum-Golgi intermediate compartment [GO:0005793]; integral component of membrane [GO:0016021]	58300	51200	53000	50900	124000	151000	70400	76000	10	5	0.98163	0.0983239	FALSE	6848.73	-0.52578	0.00224314	FALSE	non significant	0.718416
727	601	Q9UKM7	MAN1B1	ENSG00000177239:MAN1B1	Endoplasmic reticulum mannosyl-oligosaccharide 1 2-alpha-mannosidase OS=Homo sapiens OX=9606 GN=MAN1B1 PE=1 SV=2	Golgi apparatus [GO:0005794]; endoplasmic reticulum [GO:0005783]; endoplasmic reticulum membrane [GO:0005789]; endoplasmic reticulum quality control compartment [GO:0044322]; extracellular vesicle [GO:1903561]; integral component of membrane [GO:0016021]; membrane [GO:0016020]	66100	64400	46600	45900	67800	82400	124000	128000	8	8	0.850869	0.0752443	FALSE	11096.3	-0.0736995	0.870336	FALSE	non significant	0.250417
526	1142	P63027	VAMP2	ENSG00000220205:VAMP2	Vesicle-associated membrane protein 2 OS=Homo sapiens OX=9606 GN=VAMP2 PE=1 SV=3	SNARE complex [GO:0031201]; cell junction [GO:0030054]; clathrin-coated vesicle [GO:0030136]; clathrin-coated vesicle membrane [GO:0030665]; clathrin-sculpted gamma-aminobutyric acid transport vesicle membrane [GO:0061202]; clathrin-sculpted glutamate transport vesicle membrane [GO:0060203]; clathrin-sculpted monoamine transport vesicle membrane [GO:0070083]; cytoplasmic vesicle [GO:0031410]; cyt…	18800	23100	18400	18600	22600	22500	25900	20600	8	2	0.215322	0.161499	FALSE	372.339	-0.105013	0.78822	FALSE	non significant	0.150371
398	609	Q9NUP9	LIN7C	ENSG00000148943:LIN7C	Protein lin-7 homolog C OS=Homo sapiens OX=9606 GN=LIN7C PE=1 SV=1	MPP7-DLG1-LIN7 complex [GO:0097025]; basolateral plasma membrane [GO:0016323]; bicellular tight junction [GO:0005923]; cell-cell junction [GO:0005911]; cytoplasm [GO:0005737]; glutamatergic synapse [GO:0098978]; neuron projection [GO:0043005]; plasma membrane [GO:0005886]; postsynaptic density [GO:0014069]; postsynaptic membrane [GO:0045211]; presynapse [GO:0098793]; synapse [GO:0045202]	166000	196000	188000	189000	194000	194000	182000	159000	10	7	-0.0196555	0.868252	FALSE	8673.32	-0.329895	0.159318	FALSE	non significant	0.0805249
883	627	Q6WCQ1	MPRIP	ENSG00000133030:MPRIP	Myosin phosphatase Rho-interacting protein OS=Homo sapiens OX=9606 GN=MPRIP PE=1 SV=3	actin cytoskeleton [GO:0015629]; cytosol [GO:0005829]; focal adhesion [GO:0005925]	59300	59800	73200	66400	55500	50200	47400	49600	7	7	-0.351934	0.0391264	FALSE	22088.2	-0.284863	0.173313	FALSE	non significant	0.316627
571	783	Q9Y5M8	SRPRB	ENSG00000144867:SRPRB	Signal recognition particle receptor subunit beta OS=Homo sapiens OX=9606 GN=SRPRB PE=1 SV=3	cytoplasm [GO:0005737]; cytoplasmic microtubule [GO:0005881]; endoplasmic reticulum membrane [GO:0005789]; integral component of membrane [GO:0016021]; membrane [GO:0016020]	78700	85400	80700	90900	87500	87700	83300	75800	10	10	-0.00602918	0.951938	FALSE	5391.61	-0.525698	0.0326564	FALSE	non significant	0.0562986
633	562	P50479	PDLIM4	ENSG00000131435:PDLIM4	PDZ and LIM domain protein 4 OS=Homo sapiens OX=9606 GN=PDLIM4 PE=1 SV=2	Z disc [GO:0030018]; cell-cell adherens junction [GO:0005913]; cytoplasm [GO:0005737]; cytoskeleton [GO:0005856]; dendritic spine [GO:0043197]; early endosome lumen [GO:0031905]; early endosome membrane [GO:0031901]; filamentous actin [GO:0031941]; lamellipodium [GO:0030027]; nucleus [GO:0005634]; perinuclear region of cytoplasm [GO:0048471]; postsynaptic membrane [GO:0045211]; recycling endosome…	57600	62300	69300	82700	60900	65100	51900	57700	9	9	-0.206737	0.295773	FALSE	2603.2	-0.0315356	0.952863	FALSE	non significant	0.0807438
639	691	Q9Y696	CLIC4	ENSG00000169504:CLIC4	Chloride intracellular channel protein 4 OS=Homo sapiens OX=9606 GN=CLIC4 PE=1 SV=4	actin cytoskeleton [GO:0015629]; apical part of cell [GO:0045177]; cell surface [GO:0009986]; cell-cell junction [GO:0005911]; centrosome [GO:0005813]; chloride channel complex [GO:0034707]; cytoplasm [GO:0005737]; cytoplasmic vesicle membrane [GO:0030659]; cytosol [GO:0005829]; extracellular exosome [GO:0070062]; intracellular [GO:0005622]; microvillus [GO:0005902]; midbody [GO:0030496]; mitocho…	77800	97300	78300	92200	98400	83600	62500	68400	12	11	-0.143402	0.496922	FALSE	56369.7	-0.416315	0.0590629	FALSE	non significant	0.244336
758	586	Q02809	PLOD1	ENSG00000083444:PLOD1	Procollagen-lysine 2-oxoglutarate 5-dioxygenase 1 OS=Homo sapiens OX=9606 GN=PLOD1 PE=1 SV=2	catalytic complex [GO:1902494]; endoplasmic reticulum membrane [GO:0005789]; extracellular exosome [GO:0070062]; rough endoplasmic reticulum membrane [GO:0030867]	47500	45500	50800	46000	97100	79500	69800	58600	9	9	0.684329	0.0627576	FALSE	18672.9	-0.121025	0.82063	FALSE	non significant	0.287786
622	404	P69849	NOMO3	ENSG00000103226:NOMO3	Nodal modulator 3 OS=Homo sapiens OX=9606 GN=NOMO3 PE=3 SV=2	endoplasmic reticulum membrane [GO:0005789]; integral component of membrane [GO:0016021]	103000	114000	120000	125000	172000	158000	154000	133000	15	15	0.417378	0.0324125	FALSE	7307.22	-0.167558	0.671387	FALSE	non significant	0.264452
622	405	Q5JPE7	NOMO2	ENSG00000185164:NOMO2	Nodal modulator 2 OS=Homo sapiens OX=9606 GN=NOMO2 PE=1 SV=1	endoplasmic reticulum membrane [GO:0005789]; integral component of membrane [GO:0016021]; protein-containing complex [GO:0032991]	103000	114000	120000	125000	172000	158000	154000	133000	15	15	0.417378	0.0324125	FALSE	10176.2	-0.131545	0.771445	FALSE	non significant	0.234316
622	409	Q15155	NOMO1	ENSG00000103512:NOMO1	Nodal modulator 1 OS=Homo sapiens OX=9606 GN=NOMO1 PE=1 SV=5	endoplasmic reticulum membrane [GO:0005789]; integral component of membrane [GO:0016021]; membrane [GO:0016020]	101000	109000	119000	122000	170000	155000	150000	126000	14	14	0.414238	0.0465457	FALSE	9342.78	0.031355	0.945374	FALSE	non significant	0.113967
812	797	Q96SU4	OSBPL9	ENSG00000117859:OSBPL9	Oxysterol-binding protein-related protein 9 OS=Homo sapiens OX=9606 GN=OSBPL9 PE=1 SV=2	Golgi apparatus [GO:0005794]; cytosol [GO:0005829]; intracellular membrane-bounded organelle [GO:0043231]; late endosome membrane [GO:0031902]; membrane [GO:0016020]	79500	78700	73300	68100	136000	150000	107000	114000	8	8	0.758948	0.0223246	FALSE	5394.18	-0.535126	0.00246685	FALSE	non significant	0.637286
350	585	P15153	RAC2	ENSG00000128340:RAC2	Ras-related C3 botulinum toxin substrate 2 OS=Homo sapiens OX=9606 GN=RAC2 PE=1 SV=1	cell projection [GO:0042995]; cytoplasm [GO:0005737]; cytoplasmic vesicle [GO:0031410]; cytosol [GO:0005829]; extracellular exosome [GO:0070062]; focal adhesion [GO:0005925]; lamellipodium [GO:0030027]; nuclear envelope [GO:0005635]; phagocytic vesicle membrane [GO:0030670]; plasma membrane [GO:0005886]	46000	38600	28900	30200	50200	50900	26900	22900	17	2	0.0705327	0.992417	FALSE	5600.2	1.74019	0.0011334	TRUE	significant by RNA only	0.350343
539	488	O15143	ARPC1B	ENSG00000130429:ARPC1B	Actin-related protein 2/3 complex subunit 1B OS=Homo sapiens OX=9606 GN=ARPC1B PE=1 SV=3	Arp2/3 protein complex [GO:0005885]; actin cytoskeleton [GO:0015629]; cytosol [GO:0005829]; extracellular exosome [GO:0070062]; focal adhesion [GO:0005925]; nucleus [GO:0005634]; tubulobulbar complex [GO:0036284]	209000	205000	275000	287000	173000	206000	219000	249000	11	11	-0.204519	0.388323	FALSE	14152.6	0.389355	0.270079	FALSE	non significant	0.282189
588	842	P18859	ATP5J	ENSG00000154723:ATP5J	ATP synthase-coupling factor 6 mitochondrial OS=Homo sapiens OX=9606 GN=ATP5J PE=1 SV=1	cell surface [GO:0009986]; extracellular space [GO:0005615]; mitochondrial inner membrane [GO:0005743]; mitochondrial proton-transporting ATP synthase complex [GO:0005753]; mitochondrial proton-transporting ATP synthase complex, coupling factor F(o) [GO:0000276]; mitochondrion [GO:0005739]	103000	112000	170000	148000	157000	180000	154000	130000	8	8	0.220458	0.38051	FALSE	3639.45	-0.0616394	0.911396	FALSE	non significant	0.116571
801	426	P54886	ALDH18A1	ENSG00000059573:ALDH18A1	Delta-1-pyrroline-5-carboxylate synthase OS=Homo sapiens OX=9606 GN=ALDH18A1 PE=1 SV=2	cytosol [GO:0005829]; mitochondrial inner membrane [GO:0005743]; mitochondrion [GO:0005739]	49300	53400	73200	72200	64200	51000	71600	54400	10	10	-0.0406918	0.911632	FALSE	7903.42	-0.305127	0.263248	FALSE	non significant	0.111428
1937	3941	O14490	DLGAP1	ENSG00000170579:DLGAP1	Disks large-associated protein 1 OS=Homo sapiens OX=9606 GN=DLGAP1 PE=1 SV=1	cell junction [GO:0030054]; plasma membrane [GO:0005886]; postsynaptic density [GO:0014069]; postsynaptic membrane [GO:0045211]	20400	24500	21400	22300	4010	4250	4460	2860	1	1	-2.50761	0.00442599	TRUE	7.74107	-1.61177	0.00935679	FALSE	significant by MS only	2.01039
593	806	Q9NVD7	PARVA	ENSG00000197702:PARVA	Alpha-parvin OS=Homo sapiens OX=9606 GN=PARVA PE=1 SV=1	Z disc [GO:0030018]; actin cytoskeleton [GO:0015629]; cytoplasm [GO:0005737]; cytosol [GO:0005829]; focal adhesion [GO:0005925]; lamellipodium [GO:0030027]; nucleus [GO:0005634]; plasma membrane [GO:0005886]	213000	204000	225000	201000	257000	239000	207000	197000	8	8	0.0943924	0.520167	FALSE	9843.45	-0.535623	0.0272216	FALSE	non significant	0.224853
680	560	Q03519	TAP2	ENSG00000204267:TAP2	Antigen peptide transporter 2 OS=Homo sapiens OX=9606 GN=TAP2 PE=1 SV=1	MHC class I peptide loading complex [GO:0042824]; TAP complex [GO:0042825]; endoplasmic reticulum [GO:0005783]; endoplasmic reticulum membrane [GO:0005789]; endoplasmic reticulum-Golgi intermediate compartment membrane [GO:0033116]; integral component of endoplasmic reticulum membrane [GO:0030176]; integral component of membrane [GO:0016021]; membrane [GO:0016020]; nuclear speck [GO:0016607]; pha…	94600	109000	87700	102000	92600	96800	77200	70800	10	10	-0.22117	0.222072	FALSE	5902.97	0.101559	0.808421	FALSE	non significant	0.149873
841	713	Q8IUH4	ZDHHC13	ENSG00000177054:ZDHHC13	Palmitoyltransferase ZDHHC13 OS=Homo sapiens OX=9606 GN=ZDHHC13 PE=1 SV=3	Golgi membrane [GO:0000139]; Golgi-associated vesicle membrane [GO:0030660]; cytoplasmic vesicle membrane [GO:0030659]; endoplasmic reticulum [GO:0005783]; integral component of membrane [GO:0016021]; membrane [GO:0016020]	44500	52200	46600	48500	57900	66800	58700	54700	7	7	0.311965	0.0368973	FALSE	2923	-0.416229	0.0978169	FALSE	non significant	0.360346
950	532	P22314	UBA1	ENSG00000130985:UBA1	Ubiquitin-like modifier-activating enzyme 1 OS=Homo sapiens OX=9606 GN=UBA1 PE=1 SV=3	cytoplasm [GO:0005737]; cytosol [GO:0005829]; extracellular exosome [GO:0070062]; mitochondrion [GO:0005739]; nucleoplasm [GO:0005654]; nucleus [GO:0005634]	87500	86900	80600	81500	74000	88100	105000	109000	8	8	0.16051	0.455474	FALSE	22313.9	-0.270564	0.0795071	FALSE	non significant	0.208394
559	461	P02533	KRT14	ENSG00000186847:KRT14	Keratin type I cytoskeletal 14 OS=Homo sapiens OX=9606 GN=KRT14 PE=1 SV=4	basal part of cell [GO:0045178]; cell periphery [GO:0071944]; cytoplasm [GO:0005737]; cytosol [GO:0005829]; extracellular exosome [GO:0070062]; intermediate filament [GO:0005882]; keratin filament [GO:0045095]; nucleus [GO:0005634]	121000	45300	23800	56100	47300	55200	19200	24300	9	2	-0.753862	0.439908	FALSE	3.90262	-3.83628	0.00196776	FALSE	non significant	1.7006
1008	835	O95819	MAP4K4	ENSG00000071054:MAP4K4	Mitogen-activated protein kinase kinase kinase kinase 4 OS=Homo sapiens OX=9606 GN=MAP4K4 PE=1 SV=2	cytoplasm [GO:0005737]; focal adhesion [GO:0005925]	65100	59300	64000	59000	55100	51100	67700	71500	9	9	-0.0117103	0.899571	FALSE	35385.6	1.37362	5.11901e-08	TRUE	significant by RNA only	0.126828
578	1059	O00264	PGRMC1	ENSG00000101856:PGRMC1	Membrane-associated progesterone receptor component 1 OS=Homo sapiens OX=9606 GN=PGRMC1 PE=1 SV=3	cell body [GO:0044297]; endoplasmic reticulum [GO:0005783]; integral component of plasma membrane [GO:0005887]; membrane [GO:0016020]; neuron projection [GO:0043005]; neuronal cell body [GO:0043025]; plasma membrane [GO:0005886]; smooth endoplasmic reticulum membrane [GO:0030868]; specific granule membrane [GO:0035579]; synapse [GO:0045202]	156000	164000	161000	165000	207000	217000	133000	138000	8	8	0.105479	0.807796	FALSE	5401.41	-0.867843	1.6239e-05	FALSE	non significant	0.302554
648	482	P02461	COL3A1	ENSG00000168542:COL3A1	Collagen alpha-1(III) chain OS=Homo sapiens OX=9606 GN=COL3A1 PE=1 SV=4	collagen type III trimer [GO:0005586]; collagen-containing extracellular matrix [GO:0062023]; endoplasmic reticulum lumen [GO:0005788]; extracellular matrix [GO:0031012]; extracellular region [GO:0005576]; extracellular space [GO:0005615]	222000	251000	237000	222000	341000	229000	236000	219000	12	11	0.137222	0.597346	FALSE	337710	1.4059	0.0973751	FALSE	non significant	0.439228
607	494	P07948	LYN	ENSG00000254087:LYN	Tyrosine-protein kinase Lyn OS=Homo sapiens OX=9606 GN=LYN PE=1 SV=3	Golgi apparatus [GO:0005794]; cell-cell adherens junction [GO:0005913]; cytoplasm [GO:0005737]; cytosol [GO:0005829]; extracellular exosome [GO:0070062]; extrinsic component of cytoplasmic side of plasma membrane [GO:0031234]; glutamatergic synapse [GO:0098978]; integrin alpha2-beta1 complex [GO:0034666]; intracellular membrane-bounded organelle [GO:0043231]; mast cell granule [GO:0042629]; membr…	80700	80700	63700	66900	50600	52300	37600	40600	9	6	-0.689182	0.0254983	FALSE	854.124	-1.04358	0.000267808	TRUE	significant by RNA only	0.848068
2478	3211	P02749	APOH	ENSG00000091583:APOH	Beta-2-glycoprotein 1 OS=Homo sapiens OX=9606 GN=APOH PE=1 SV=3	cell surface [GO:0009986]; chylomicron [GO:0042627]; collagen-containing extracellular matrix [GO:0062023]; extracellular exosome [GO:0070062]; extracellular region [GO:0005576]; extracellular space [GO:0005615]; high-density lipoprotein particle [GO:0034364]; platelet dense granule lumen [GO:0031089]; very-low-density lipoprotein particle [GO:0034361]	6040	4440	5180	6220	12200	9040	12900	9770	1	1	1.00494	0.0134002	TRUE	2.71475	3.08609	0.0271212	FALSE	significant by MS only	1.76106
2451	2793	Q96CM4	NXNL1	ENSG00000171773:NXNL1	Nucleoredoxin-like protein 1 OS=Homo sapiens OX=9606 GN=NXNL1 PE=2 SV=1	photoreceptor outer segment [GO:0001750]	57800	53700	44900	59700	173000	108000	118000	93700	1	1	1.18901	0.0263287	TRUE	1.29311	2.47962	0.303315	FALSE	significant by MS only	1.71706
690	541	P13674	P4HA1	ENSG00000122884:P4HA1	Prolyl 4-hydroxylase subunit alpha-1 OS=Homo sapiens OX=9606 GN=P4HA1 PE=1 SV=2	endoplasmic reticulum [GO:0005783]; endoplasmic reticulum lumen [GO:0005788]; intracellular membrane-bounded organelle [GO:0043231]; membrane [GO:0016020]; mitochondrion [GO:0005739]; procollagen-proline 4-dioxygenase complex [GO:0016222]	65100	79100	131000	88900	115000	98000	110000	70900	9	9	0.113495	0.711933	FALSE	19142.2	-0.444728	0.336872	FALSE	non significant	0.224665
347	794	P13987	CD59	ENSG00000085063:CD59	CD59 glycoprotein OS=Homo sapiens OX=9606 GN=CD59 PE=1 SV=1	ER to Golgi transport vesicle membrane [GO:0012507]; Golgi membrane [GO:0000139]; anchored component of external side of plasma membrane [GO:0031362]; cell surface [GO:0009986]; endoplasmic reticulum membrane [GO:0005789]; endoplasmic reticulum-Golgi intermediate compartment membrane [GO:0033116]; extracellular exosome [GO:0070062]; extracellular space [GO:0005615]; focal adhesion [GO:0005925]; m…	624000	534000	485000	451000	475000	472000	424000	505000	12	12	-0.158602	0.354055	FALSE	47375.3	-0.262621	0.265094	FALSE	non significant	0.204089
340	695	P07602	PSAP	ENSG00000197746:PSAP	Prosaposin OS=Homo sapiens OX=9606 GN=PSAP PE=1 SV=2	azurophil granule membrane [GO:0035577]; collagen-containing extracellular matrix [GO:0062023]; extracellular exosome [GO:0070062]; extracellular region [GO:0005576]; extracellular space [GO:0005615]; intracellular membrane-bounded organelle [GO:0043231]; late endosome [GO:0005770]; lysosomal lumen [GO:0043202]; lysosomal membrane [GO:0005765]; lysosome [GO:0005764]; plasma membrane [GO:0005886]	304000	404000	530000	511000	607000	712000	1330000	1240000	13	13	1.15287	0.0646953	FALSE	82880.5	0.744209	0.0698368	FALSE	non significant	0.926269
519	620	O95292	VAPB	ENSG00000124164:VAPB	Vesicle-associated membrane protein-associated protein B/C OS=Homo sapiens OX=9606 GN=VAPB PE=1 SV=3	Golgi apparatus [GO:0005794]; Golgi membrane [GO:0000139]; cytoplasm [GO:0005737]; endoplasmic reticulum [GO:0005783]; endoplasmic reticulum membrane [GO:0005789]; integral component of membrane [GO:0016021]; plasma membrane [GO:0005886]	369000	312000	328000	352000	356000	269000	213000	198000	12	10	-0.393643	0.192909	FALSE	2560.74	-0.719592	0.0105726	FALSE	non significant	0.532224
717	788	O14653	GOSR2	ENSG00000108433:GOSR2	Golgi SNAP receptor complex member 2 OS=Homo sapiens OX=9606 GN=GOSR2 PE=1 SV=2	ER to Golgi transport vesicle membrane [GO:0012507]; Golgi apparatus [GO:0005794]; Golgi membrane [GO:0000139]; SNARE complex [GO:0031201]; cytosol [GO:0005829]; endoplasmic reticulum membrane [GO:0005789]; endoplasmic reticulum-Golgi intermediate compartment membrane [GO:0033116]; integral component of membrane [GO:0016021]; late endosome membrane [GO:0031902]; membrane [GO:0016020]	44000	46900	45700	42700	65900	61700	56300	52000	8	8	0.3958	0.038796	FALSE	3624.2	-0.0878185	0.740447	FALSE	non significant	0.186437
701	529	P60842	EIF4A1	ENSG00000161960:EIF4A1	Eukaryotic initiation factor 4A-I OS=Homo sapiens OX=9606 GN=EIF4A1 PE=1 SV=1	cytoplasm [GO:0005737]; cytosol [GO:0005829]; eukaryotic translation initiation factor 4F complex [GO:0016281]; extracellular exosome [GO:0070062]; membrane [GO:0016020]	157000	156000	162000	211000	119000	135000	118000	126000	13	13	-0.462063	0.0552742	FALSE	59261	0.29599	0.392661	FALSE	non significant	0.369819
834	449	Q9Y5S2	CDC42BPB	ENSG00000198752:CDC42BPB	Serine/threonine-protein kinase MRCK beta OS=Homo sapiens OX=9606 GN=CDC42BPB PE=1 SV=2	actomyosin [GO:0042641]; cell leading edge [GO:0031252]; cell-cell junction [GO:0005911]; cytoplasm [GO:0005737]; cytoskeleton [GO:0005856]; extracellular exosome [GO:0070062]; lamellipodium [GO:0030027]; plasma membrane [GO:0005886]	111000	122000	100000	103000	95900	117000	103000	111000	13	13	-0.03043	0.81802	FALSE	10297.2	-0.0370475	0.890447	FALSE	non significant	0.0335761
466	626	P02786	TFRC	ENSG00000072274:TFRC	Transferrin receptor protein 1 OS=Homo sapiens OX=9606 GN=TFRC PE=1 SV=2	HFE-transferrin receptor complex [GO:1990712]; basolateral plasma membrane [GO:0016323]; blood microparticle [GO:0072562]; cell surface [GO:0009986]; clathrin-coated pit [GO:0005905]; clathrin-coated vesicle membrane [GO:0030665]; cytoplasmic vesicle [GO:0031410]; early endosome [GO:0005769]; endosome [GO:0005768]; endosome membrane [GO:0010008]; external side of plasma membrane [GO:0009897]; ext…	226000	224000	187000	181000	284000	215000	218000	240000	9	9	0.226418	0.212662	FALSE	34717.9	0.286312	0.439827	FALSE	non significant	0.25461
719	500	P09110	ACAA1	ENSG00000060971:ACAA1	3-ketoacyl-CoA thiolase peroxisomal OS=Homo sapiens OX=9606 GN=ACAA1 PE=1 SV=2	cytosol [GO:0005829]; extracellular region [GO:0005576]; intracellular membrane-bounded organelle [GO:0043231]; membrane [GO:0016020]; peroxisomal matrix [GO:0005782]; peroxisome [GO:0005777]; specific granule lumen [GO:0035580]	89000	97400	110000	103000	117000	109000	108000	93300	9	9	0.097415	0.453485	FALSE	1981.23	-0.753979	0.00761577	FALSE	non significant	0.271014
545	452	P35240	NF2	ENSG00000186575:NF2	Merlin OS=Homo sapiens OX=9606 GN=NF2 PE=1 SV=1	adherens junction [GO:0005912]; apical part of cell [GO:0045177]; cell body [GO:0044297]; cleavage furrow [GO:0032154]; cortical actin cytoskeleton [GO:0030864]; cytoplasm [GO:0005737]; cytoskeleton [GO:0005856]; cytosol [GO:0005829]; early endosome [GO:0005769]; filopodium membrane [GO:0031527]; lamellipodium [GO:0030027]; membrane [GO:0016020]; neuron projection [GO:0043005]; nucleolus [GO:0005…	183000	191000	149000	177000	146000	154000	122000	123000	14	11	-0.361099	0.0637824	FALSE	12105.6	-0.885278	8.78103e-05	FALSE	non significant	0.565396
862	671	Q14157	UBAP2L	ENSG00000143569:UBAP2L	Ubiquitin-associated protein 2-like OS=Homo sapiens OX=9606 GN=UBAP2L PE=1 SV=2	PcG protein complex [GO:0031519]; cytoplasm [GO:0005737]; nucleus [GO:0005634]	56600	57300	66400	66700	90300	84200	118000	83700	7	7	0.606989	0.0360611	FALSE	7467.24	0.251347	0.463034	FALSE	non significant	0.390595
632	516	Q15417	CNN3	ENSG00000117519:CNN3	Calponin-3 OS=Homo sapiens OX=9606 GN=CNN3 PE=1 SV=1	actin cytoskeleton [GO:0015629]; cell-cell adherens junction [GO:0005913]; cytosol [GO:0005829]; dendritic spine [GO:0043197]; focal adhesion [GO:0005925]; neuronal cell body [GO:0043025]; postsynaptic density [GO:0014069]	68400	73800	83200	84900	64900	54700	42100	43100	12	8	-0.599448	0.0580959	FALSE	30878.6	-1.32876	3.01641e-08	TRUE	significant by RNA only	0.892481
872	675	Q13393	PLD1	ENSG00000075651:PLD1	Phospholipase D1 OS=Homo sapiens OX=9606 GN=PLD1 PE=1 SV=1	Golgi apparatus [GO:0005794]; Golgi membrane [GO:0000139]; apical plasma membrane [GO:0016324]; cholinergic synapse [GO:0098981]; endocytic vesicle [GO:0030139]; endoplasmic reticulum membrane [GO:0005789]; endosome [GO:0005768]; late endosome membrane [GO:0031902]; lysosomal membrane [GO:0005765]; membrane [GO:0016020]; perinuclear region of cytoplasm [GO:0048471]; plasma membrane [GO:0005886]; …	22700	16900	15100	18800	25600	22100	18300	15800	7	7	0.154357	0.585792	FALSE	2595.95	-0.0952637	0.842026	FALSE	non significant	0.121262
640	709	Q8TED1	GPX8	ENSG00000164294:GPX8	Probable glutathione peroxidase 8 OS=Homo sapiens OX=9606 GN=GPX8 PE=1 SV=2	endoplasmic reticulum lumen [GO:0005788]; integral component of membrane [GO:0016021]	123000	141000	132000	116000	186000	182000	131000	141000	10	10	0.321928	0.172176	FALSE	9462.78	-0.957127	0.0120303	FALSE	non significant	0.555091
742	574	O00571	DDX3X	ENSG00000215301:DDX3X	ATP-dependent RNA helicase DDX3X OS=Homo sapiens OX=9606 GN=DDX3X PE=1 SV=3	P granule [GO:0043186]; cytoplasm [GO:0005737]; cytoplasmic stress granule [GO:0010494]; cytosol [GO:0005829]; extracellular exosome [GO:0070062]; extracellular region [GO:0005576]; ficolin-1-rich granule lumen [GO:1904813]; mitochondrial outer membrane [GO:0005741]; nuclear speck [GO:0016607]; nucleus [GO:0005634]; secretory granule lumen [GO:0034774]	33800	73200	55300	53900	38300	52300	54100	55600	9	8	-0.110204	0.853945	FALSE	24634.3	-0.278785	0.120114	FALSE	non significant	0.175281
673	659	P28288	ABCD3	ENSG00000117528:ABCD3	ATP-binding cassette sub-family D member 3 OS=Homo sapiens OX=9606 GN=ABCD3 PE=1 SV=1	cytosol [GO:0005829]; integral component of membrane [GO:0016021]; intracellular membrane-bounded organelle [GO:0043231]; membrane [GO:0016020]; mitochondrion [GO:0005739]; peroxisomal matrix [GO:0005782]; peroxisomal membrane [GO:0005778]; peroxisome [GO:0005777]	70800	90700	80100	74300	105000	116000	88400	82500	7	7	0.311018	0.149396	FALSE	8714.27	-1.20594	1.44973e-06	TRUE	significant by RNA only	0.612429
624	478	P30530	AXL	ENSG00000167601:AXL	Tyrosine-protein kinase receptor UFO OS=Homo sapiens OX=9606 GN=AXL PE=1 SV=4	cell surface [GO:0009986]; extracellular exosome [GO:0070062]; extracellular space [GO:0005615]; host cell surface [GO:0044228]; integral component of plasma membrane [GO:0005887]; plasma membrane [GO:0005886]; receptor complex [GO:0043235]	90100	94500	81500	92000	150000	122000	119000	112000	10	10	0.490196	0.0346618	FALSE	41786.8	-0.361132	0.378139	FALSE	non significant	0.420744
763	739	P54920	NAPA	ENSG00000105402:NAPA	Alpha-soluble NSF attachment protein OS=Homo sapiens OX=9606 GN=NAPA PE=1 SV=3	Golgi membrane [GO:0000139]; SNARE complex [GO:0031201]; cytosol [GO:0005829]; extracellular exosome [GO:0070062]; glutamatergic synapse [GO:0098978]; membrane [GO:0016020]; plasma membrane [GO:0005886]; postsynapse [GO:0098794]; presynapse [GO:0098793]; synaptobrevin 2-SNAP-25-syntaxin-1a complex [GO:0070044]; vacuolar membrane [GO:0005774]	68900	65200	75200	77100	75300	70500	68300	66300	7	7	-0.0305451	0.770911	FALSE	5390.17	-0.575483	0.0112018	FALSE	non significant	0.132583
507	694	P50897	PPT1	ENSG00000131238:PPT1	Palmitoyl-protein thioesterase 1 OS=Homo sapiens OX=9606 GN=PPT1 PE=1 SV=1	Golgi apparatus [GO:0005794]; axon [GO:0030424]; cytosol [GO:0005829]; dendrite [GO:0030425]; extracellular exosome [GO:0070062]; extracellular region [GO:0005576]; lysosomal lumen [GO:0043202]; lysosome [GO:0005764]; membrane [GO:0016020]; membrane raft [GO:0045121]; neuronal cell body [GO:0043025]; nucleus [GO:0005634]; synaptic vesicle [GO:0008021]	139000	114000	126000	128000	174000	189000	300000	312000	10	10	0.943416	0.0669712	FALSE	11568.1	-0.188978	0.501362	FALSE	non significant	0.422238
465	530	Q9BUF5	TUBB6	ENSG00000176014:TUBB6	Tubulin beta-6 chain OS=Homo sapiens OX=9606 GN=TUBB6 PE=1 SV=1	cytoplasm [GO:0005737]; extracellular exosome [GO:0070062]; microtubule [GO:0005874]; nucleus [GO:0005634]	13900	17400	14700	16100	24900	28700	21900	15600	17	4	0.552858	0.132441	FALSE	18686.9	-0.949583	8.90458e-05	FALSE	non significant	0.724558
948	637	O43264	ZW10	ENSG00000086827:ZW10	Centromere/kinetochore protein zw10 homolog OS=Homo sapiens OX=9606 GN=ZW10 PE=1 SV=3	Dsl1/NZR complex [GO:0070939]; RZZ complex [GO:1990423]; condensed chromosome kinetochore [GO:0000777]; cytosol [GO:0005829]; endoplasmic reticulum [GO:0005783]; endoplasmic reticulum membrane [GO:0005789]; kinetochore [GO:0000776]; kinetochore microtubule [GO:0005828]; membrane [GO:0016020]; nucleus [GO:0005634]; spindle pole [GO:0000922]	46600	53500	50800	51600	42700	41000	32600	32600	7	7	-0.443578	0.0562803	FALSE	2492.52	-0.260048	0.242794	FALSE	non significant	0.339634
807	639	Q9P2B2	PTGFRN	ENSG00000134247:PTGFRN	Prostaglandin F2 receptor negative regulator OS=Homo sapiens OX=9606 GN=PTGFRN PE=1 SV=2	Golgi apparatus [GO:0005794]; cell surface [GO:0009986]; endoplasmic reticulum membrane [GO:0005789]; integral component of membrane [GO:0016021]	119000	128000	98900	104000	54600	49900	59500	64800	9	9	-0.975517	0.00552333	FALSE	12129.7	-1.90844	6.79325e-08	TRUE	significant by RNA only	1.36445
494	719	P50914	RPL14	ENSG00000188846:RPL14	60S ribosomal protein L14 OS=Homo sapiens OX=9606 GN=RPL14 PE=1 SV=4	cytosol [GO:0005829]; cytosolic large ribosomal subunit [GO:0022625]; extracellular exosome [GO:0070062]; membrane [GO:0016020]; postsynaptic density [GO:0014069]	507000	490000	485000	496000	770000	495000	522000	483000	14	14	0.19865	0.466012	FALSE	22658.2	0.272103	0.500562	FALSE	non significant	0.232493
740	752	O14579	COPE	ENSG00000105669:COPE	Coatomer subunit epsilon OS=Homo sapiens OX=9606 GN=COPE PE=1 SV=3	COPI vesicle coat [GO:0030126]; Golgi apparatus [GO:0005794]; Golgi membrane [GO:0000139]; cytosol [GO:0005829]; endoplasmic reticulum membrane [GO:0005789]; nucleoplasm [GO:0005654]; transport vesicle [GO:0030133]	72600	95400	103000	107000	76300	100000	108000	94600	8	8	0.00343091	0.976592	FALSE	8216.58	-0.180858	0.568326	FALSE	non significant	0.02491
947	613	P42224	STAT1	ENSG00000115415:STAT1	Signal transducer and activator of transcription 1-alpha/beta OS=Homo sapiens OX=9606 GN=STAT1 PE=1 SV=2	axon [GO:0030424]; cytoplasm [GO:0005737]; cytosol [GO:0005829]; dendrite [GO:0030425]; nuclear chromatin [GO:0000790]; nucleolus [GO:0005730]; nucleoplasm [GO:0005654]; nucleus [GO:0005634]; perinuclear region of cytoplasm [GO:0048471]; protein-containing complex [GO:0032991]	50500	52300	51200	58200	52800	55800	52600	53700	8	8	0.0182408	0.789477	FALSE	17764.1	0.128687	0.666987	FALSE	non significant	0.0484494
474	598	Q9H3N1	TMX1	ENSG00000139921:TMX1	Thioredoxin-related transmembrane protein 1 OS=Homo sapiens OX=9606 GN=TMX1 PE=1 SV=1	endoplasmic reticulum membrane [GO:0005789]; integral component of membrane [GO:0016021]	231000	246000	226000	214000	415000	327000	306000	292000	11	11	0.547239	0.0475588	FALSE	6104.48	-0.354763	0.126215	FALSE	non significant	0.440614
592	607	Q9UHG3	PCYOX1	ENSG00000116005:PCYOX1	Prenylcysteine oxidase 1 OS=Homo sapiens OX=9606 GN=PCYOX1 PE=1 SV=3	extracellular exosome [GO:0070062]; lysosome [GO:0005764]; plasma membrane [GO:0005886]; very-low-density lipoprotein particle [GO:0034361]	98000	108000	86000	84400	163000	196000	163000	172000	8	8	0.882669	0.00651871	FALSE	10651.3	-0.125493	0.757225	FALSE	non significant	0.33282
509	699	P62899	RPL31	ENSG00000071082:RPL31	60S ribosomal protein L31 OS=Homo sapiens OX=9606 GN=RPL31 PE=1 SV=1	cytosol [GO:0005829]; cytosolic large ribosomal subunit [GO:0022625]; extracellular exosome [GO:0070062]; focal adhesion [GO:0005925]; membrane [GO:0016020]; polysomal ribosome [GO:0042788]	363000	395000	326000	347000	390000	315000	367000	379000	13	13	0.0200238	0.892532	FALSE	27443.7	0.203395	0.701592	FALSE	non significant	0.0638181
380	756	P20648	ATP4A	ENSG00000105675:ATP4A	Potassium-transporting ATPase alpha chain 1 OS=Homo sapiens OX=9606 GN=ATP4A PE=2 SV=5	extracellular space [GO:0005615]; integral component of plasma membrane [GO:0005887]; plasma membrane [GO:0005886]	5800	8200	6280	6660	6460	5140	3440	4300	10	2	-0.478162	0.150058	FALSE	9.61739	0.552332	0.54562	FALSE	non significant	0.513911
542	1002	Q13162	PRDX4	ENSG00000123131:PRDX4	Peroxiredoxin-4 OS=Homo sapiens OX=9606 GN=PRDX4 PE=1 SV=1	cytosol [GO:0005829]; endoplasmic reticulum [GO:0005783]; extracellular exosome [GO:0070062]; extracellular region [GO:0005576]; ficolin-1-rich granule lumen [GO:1904813]; nucleus [GO:0005634]; secretory granule lumen [GO:0034774]; smooth endoplasmic reticulum [GO:0005790]	73100	65000	77800	86100	87700	65200	71500	67600	10	3	-0.0485802	0.784141	FALSE	7188.43	-0.0944697	0.743263	FALSE	non significant	0.0677448
565	740	Q96JJ7	TMX3	ENSG00000166479:TMX3	Protein disulfide-isomerase TMX3 OS=Homo sapiens OX=9606 GN=TMX3 PE=1 SV=2	cell surface [GO:0009986]; endoplasmic reticulum membrane [GO:0005789]; integral component of membrane [GO:0016021]; plasma membrane [GO:0005886]; platelet alpha granule membrane [GO:0031092]	213000	225000	186000	204000	305000	311000	235000	261000	12	12	0.425454	0.0507975	FALSE	18358.7	-0.418892	0.152449	FALSE	non significant	0.42216
577	1008	P07711	CTSL	ENSG00000135047:CTSL	Cathepsin L1 OS=Homo sapiens OX=9606 GN=CTSL PE=1 SV=2	collagen-containing extracellular matrix [GO:0062023]; endolysosome lumen [GO:0036021]; extracellular exosome [GO:0070062]; extracellular region [GO:0005576]; extracellular space [GO:0005615]; lysosomal lumen [GO:0043202]; lysosome [GO:0005764]; multivesicular body [GO:0005771]; nucleus [GO:0005634]; plasma membrane [GO:0005886]	244000	262000	258000	266000	192000	188000	159000	147000	7	7	-0.586364	0.0309888	FALSE	22116.9	-0.974241	0.0414781	FALSE	non significant	0.755817
1656	2030	Q6UVY6	MOXD1	ENSG00000079931:MOXD1	DBH-like monooxygenase protein 1 OS=Homo sapiens OX=9606 GN=MOXD1 PE=1 SV=1	cytoplasm [GO:0005737]; endoplasmic reticulum membrane [GO:0005789]; extracellular space [GO:0005615]; integral component of membrane [GO:0016021]; secretory granule membrane [GO:0030667]	471.428	967.221	1150	848.742	6080	7670	20000	25700	1	1	4.11229	0.0156127	TRUE	4441.82	0.671478	0.397045	FALSE	significant by MS only	1.66172
525	651	Q07020	RPL18	ENSG00000063177:RPL18	60S ribosomal protein L18 OS=Homo sapiens OX=9606 GN=RPL18 PE=1 SV=2	cytosol [GO:0005829]; cytosolic large ribosomal subunit [GO:0022625]; endoplasmic reticulum [GO:0005783]; focal adhesion [GO:0005925]; membrane [GO:0016020]; nucleolus [GO:0005730]; nucleus [GO:0005634]; polysomal ribosome [GO:0042788]; rough endoplasmic reticulum [GO:0005791]	406000	367000	365000	413000	599000	320000	368000	322000	11	11	0.0529656	0.992251	FALSE	24440.2	0.466992	0.208588	FALSE	non significant	0.157272
456	1542	P60866	RPS20	ENSG00000008988:RPS20	40S ribosomal protein S20 OS=Homo sapiens OX=9606 GN=RPS20 PE=1 SV=1	cytosol [GO:0005829]; cytosolic small ribosomal subunit [GO:0022627]; extracellular exosome [GO:0070062]; membrane [GO:0016020]; nucleoplasm [GO:0005654]	358000	347000	386000	356000	338000	324000	285000	211000	7	7	-0.32143	0.195931	FALSE	35230.6	0.155788	0.753663	FALSE	non significant	0.223774
694	929	P55209	NAP1L1	ENSG00000187109:NAP1L1	Nucleosome assembly protein 1-like 1 OS=Homo sapiens OX=9606 GN=NAP1L1 PE=1 SV=1	cytoplasm [GO:0005737]; melanosome [GO:0042470]; membrane [GO:0016020]; nucleus [GO:0005634]	82800	86400	88000	86700	86000	92000	81900	71400	6	6	-0.0538509	0.601262	FALSE	32433.9	-0.253895	0.375777	FALSE	non significant	0.116929
512	814	P62888	RPL30	ENSG00000156482:RPL30	60S ribosomal protein L30 OS=Homo sapiens OX=9606 GN=RPL30 PE=1 SV=2	cytosol [GO:0005829]; cytosolic large ribosomal subunit [GO:0022625]; extracellular exosome [GO:0070062]; focal adhesion [GO:0005925]; membrane [GO:0016020]; nucleus [GO:0005634]; polysomal ribosome [GO:0042788]; postsynaptic density [GO:0014069]	231000	208000	205000	199000	326000	279000	266000	245000	10	10	0.404732	0.0451547	FALSE	27333	0.486902	0.2159	FALSE	non significant	0.44392
461	572	P59998	ARPC4	ENSG00000241553:ARPC4	Actin-related protein 2/3 complex subunit 4 OS=Homo sapiens OX=9606 GN=ARPC4 PE=1 SV=3	Arp2/3 protein complex [GO:0005885]; cell projection [GO:0042995]; cytosol [GO:0005829]; extracellular exosome [GO:0070062]; nucleus [GO:0005634]; site of double-strand break [GO:0035861]	252000	276000	310000	333000	228000	230000	218000	240000	10	10	-0.354322	0.0709237	FALSE	13965.2	-0.227676	0.531325	FALSE	non significant	0.284025
360	557	P62913	RPL11	ENSG00000142676:RPL11	60S ribosomal protein L11 OS=Homo sapiens OX=9606 GN=RPL11 PE=1 SV=2	cytoplasm [GO:0005737]; cytosol [GO:0005829]; cytosolic large ribosomal subunit [GO:0022625]; extracellular exosome [GO:0070062]; membrane [GO:0016020]; nucleolus [GO:0005730]; nucleoplasm [GO:0005654]; polysomal ribosome [GO:0042788]; protein-containing complex [GO:0032991]	446000	445000	499000	489000	298000	294000	393000	336000	11	10	-0.508335	0.035983	FALSE	40809.3	0.545807	0.165462	FALSE	non significant	0.526738
768	594	O60763	USO1	ENSG00000138768:USO1	General vesicular transport factor p115 OS=Homo sapiens OX=9606 GN=USO1 PE=1 SV=2	ER to Golgi transport vesicle membrane [GO:0012507]; Golgi apparatus [GO:0005794]; Golgi membrane [GO:0000139]; Golgi stack [GO:0005795]; cytosol [GO:0005829]; endoplasmic reticulum [GO:0005783]; fibrillar center [GO:0001650]; membrane [GO:0016020]; perinuclear region of cytoplasm [GO:0048471]; transport vesicle [GO:0030133]	68400	72800	96000	95500	64200	78500	62000	55500	9	8	-0.354601	0.160066	FALSE	11777.7	-0.174538	0.429549	FALSE	non significant	0.24878
693	732	P45880	VDAC2	ENSG00000165637:VDAC2	Voltage-dependent anion-selective channel protein 2 OS=Homo sapiens OX=9606 GN=VDAC2 PE=1 SV=2	acrosomal vesicle [GO:0001669]; membrane raft [GO:0045121]; mitochondrial nucleoid [GO:0042645]; mitochondrial outer membrane [GO:0005741]; mitochondrion [GO:0005739]; nucleus [GO:0005634]; pore complex [GO:0046930]; synaptic vesicle [GO:0008021]	66200	65900	67900	68900	68400	71900	73500	69100	9	8	0.0732224	0.115073	FALSE	10903.2	-0.85083	3.53702e-06	FALSE	non significant	0.249599
590	1005	Q8TCT9	HM13	ENSG00000101294:HM13	Minor histocompatibility antigen H13 OS=Homo sapiens OX=9606 GN=HM13 PE=1 SV=1	Derlin-1 retrotranslocation complex [GO:0036513]; cell surface [GO:0009986]; endoplasmic reticulum [GO:0005783]; endoplasmic reticulum membrane [GO:0005789]; integral component of cytoplasmic side of endoplasmic reticulum membrane [GO:0071458]; integral component of lumenal side of endoplasmic reticulum membrane [GO:0071556]; membrane [GO:0016020]; plasma membrane [GO:0005886]; rough endoplasmic …	65700	68700	69600	63200	128000	124000	90800	80000	6	6	0.662055	0.0806623	FALSE	6869.36	0.0169594	0.968007	FALSE	non significant	0.105962
794	608	P11532	DMD	ENSG00000198947:DMD	Dystrophin OS=Homo sapiens OX=9606 GN=DMD PE=1 SV=3	Z disc [GO:0030018]; cell surface [GO:0009986]; cell-substrate junction [GO:0030055]; costamere [GO:0043034]; cytoskeleton [GO:0005856]; cytosol [GO:0005829]; dystrophin-associated glycoprotein complex [GO:0016010]; filopodium [GO:0030175]; filopodium membrane [GO:0031527]; membrane raft [GO:0045121]; neuron projection terminus [GO:0044306]; nucleus [GO:0005634]; plasma membrane [GO:0005886]; pos…	115000	131000	102000	108000	147000	169000	181000	242000	15	9	0.696541	0.0490667	FALSE	444.759	0.23735	0.764202	FALSE	non significant	0.406601
957	971	A1L0T0	ILVBL	ENSG00000105135:ILVBL	Acetolactate synthase-like protein OS=Homo sapiens OX=9606 GN=ILVBL PE=1 SV=2	integral component of membrane [GO:0016021]; membrane [GO:0016020]	41800	42500	34200	38800	52000	51900	45100	41400	7	7	0.275515	0.104369	FALSE	3351.67	-0.281109	0.428359	FALSE	non significant	0.278298
806	554	P53618	COPB1	ENSG00000129083:COPB1	Coatomer subunit beta OS=Homo sapiens OX=9606 GN=COPB1 PE=1 SV=3	COPI vesicle coat [GO:0030126]; Golgi apparatus [GO:0005794]; Golgi membrane [GO:0000139]; Golgi-associated vesicle [GO:0005798]; cytosol [GO:0005829]; endoplasmic reticulum membrane [GO:0005789]; endoplasmic reticulum-Golgi intermediate compartment [GO:0005793]; ficolin-1-rich granule membrane [GO:0101003]; intracellular membrane-bounded organelle [GO:0043231]; membrane [GO:0016020]; plasma memb…	131000	147000	176000	185000	134000	133000	163000	139000	8	8	-0.167387	0.399503	FALSE	22906	-0.440086	0.00151869	FALSE	non significant	0.271413
598	696	Q02543	RPL18A	ENSG00000105640:RPL18A	60S ribosomal protein L18a OS=Homo sapiens OX=9606 GN=RPL18A PE=1 SV=2	cytosol [GO:0005829]; cytosolic large ribosomal subunit [GO:0022625]; membrane [GO:0016020]; polysomal ribosome [GO:0042788]	332000	318000	312000	271000	288000	221000	401000	383000	7	7	0.0685495	0.921995	FALSE	21609.9	0.480964	0.297785	FALSE	non significant	0.181576
845	869	Q15165	PON2	ENSG00000105854:PON2	Serum paraoxonase/arylesterase 2 OS=Homo sapiens OX=9606 GN=PON2 PE=1 SV=4	extracellular region [GO:0005576]; lysosome [GO:0005764]; mitochondrion [GO:0005739]; nucleus [GO:0005634]; plasma membrane [GO:0005886]	23600	34100	32200	36800	14200	19700	20000	18100	5	5	-0.815348	0.028589	FALSE	9904.99	-0.45977	0.0335173	FALSE	non significant	0.612269
769	679	Q9UP95	SLC12A4	ENSG00000124067:SLC12A4	Solute carrier family 12 member 4 OS=Homo sapiens OX=9606 GN=SLC12A4 PE=1 SV=2	integral component of plasma membrane [GO:0005887]; lysosomal membrane [GO:0005765]; membrane [GO:0016020]; plasma membrane [GO:0005886]	74300	81900	63200	64800	71500	60800	70100	83500	6	6	0.00860407	0.969506	FALSE	11072.1	-0.717721	0.0185755	FALSE	non significant	0.0785832
5028	4625	Q14324	MYBPC2	ENSG00000086967:MYBPC2	Myosin-binding protein C fast-type OS=Homo sapiens OX=9606 GN=MYBPC2 PE=1 SV=2	M band [GO:0031430]; Z disc [GO:0030018]; cytosol [GO:0005829]; myosin filament [GO:0032982]; sarcomere [GO:0030017]; striated muscle thin filament [GO:0005865]	19100	28500	23800	28500	4700	4740	5970	9990	1	1	-1.97566	0.0149291	TRUE	10.1166	-1.28681	0.152061	FALSE	significant by MS only	1.59446
839	693	P51798	CLCN7	ENSG00000103249:CLCN7	H(+)/Cl(-) exchange transporter 7 OS=Homo sapiens OX=9606 GN=CLCN7 PE=1 SV=2	cytoplasmic vesicle [GO:0031410]; integral component of membrane [GO:0016021]; intracellular membrane-bounded organelle [GO:0043231]; lysosomal membrane [GO:0005765]; membrane [GO:0016020]; nucleoplasm [GO:0005654]	41600	39200	34600	41600	76300	62500	50500	54900	8	8	0.637299	0.0423467	FALSE	7486.9	0.150346	0.775858	FALSE	non significant	0.309541
833	670	Q92538	GBF1	ENSG00000107862:GBF1	Golgi-specific brefeldin A-resistance guanine nucleotide exchange factor 1 OS=Homo sapiens OX=9606 GN=GBF1 PE=1 SV=2	Golgi apparatus [GO:0005794]; Golgi membrane [GO:0000139]; Golgi stack [GO:0005795]; cell leading edge [GO:0031252]; cis-Golgi network [GO:0005801]; cytosol [GO:0005829]; endoplasmic reticulum lumen [GO:0005788]; endoplasmic reticulum-Golgi intermediate compartment [GO:0005793]; lipid droplet [GO:0005811]; membrane [GO:0016020]; mitochondrion [GO:0005739]; peroxisome [GO:0005777]; trans-Golgi net…	38500	54100	44300	41300	43500	52500	45100	41600	10	10	0.0359793	0.821038	FALSE	6734.47	-0.329081	0.412727	FALSE	non significant	0.108812
681	591	Q96A33	CCDC47	ENSG00000108588:CCDC47	Coiled-coil domain-containing protein 47 OS=Homo sapiens OX=9606 GN=CCDC47 PE=1 SV=1	endoplasmic reticulum [GO:0005783]; integral component of membrane [GO:0016021]; membrane [GO:0016020]; rough endoplasmic reticulum [GO:0005791]	98900	92000	96000	88400	193000	180000	181000	162000	8	8	0.931915	0.00229584	FALSE	8234.69	-0.0358409	0.912875	FALSE	non significant	0.182758
711	650	P46977	STT3A	ENSG00000134910:STT3A	Dolichyl-diphosphooligosaccharide--protein glycosyltransferase subunit STT3A OS=Homo sapiens OX=9606 GN=STT3A PE=1 SV=2	endoplasmic reticulum membrane [GO:0005789]; integral component of membrane [GO:0016021]; membrane [GO:0016020]; oligosaccharyltransferase III complex [GO:0035000]; oligosaccharyltransferase complex [GO:0008250]	76800	95000	88000	104000	119000	123000	117000	110000	7	7	0.366442	0.0646221	FALSE	23907.9	-0.296759	0.436868	FALSE	non significant	0.329765
880	578	Q8IWJ2	GCC2	ENSG00000135968:GCC2	GRIP and coiled-coil domain-containing protein 2 OS=Homo sapiens OX=9606 GN=GCC2 PE=1 SV=4	Golgi apparatus [GO:0005794]; cytoplasm [GO:0005737]; cytosol [GO:0005829]; membrane [GO:0016020]; nucleoplasm [GO:0005654]; trans-Golgi network [GO:0005802]	99900	101000	94500	92800	132000	164000	138000	116000	13	11	0.502632	0.050814	FALSE	5556.59	0.203914	0.227534	FALSE	non significant	0.320146
741	763	Q15005	SPCS2	ENSG00000118363:SPCS2	Signal peptidase complex subunit 2 OS=Homo sapiens OX=9606 GN=SPCS2 PE=1 SV=3	endoplasmic reticulum membrane [GO:0005789]; integral component of membrane [GO:0016021]; signal peptidase complex [GO:0005787]	112000	114000	117000	105000	208000	248000	150000	137000	7	7	0.729863	0.0960815	FALSE	2263.69	-0.207443	0.499136	FALSE	non significant	0.389108
546	1015	Q14956	GPNMB	ENSG00000136235:GPNMB	Transmembrane glycoprotein NMB OS=Homo sapiens OX=9606 GN=GPNMB PE=1 SV=2	early endosome membrane [GO:0031901]; integral component of membrane [GO:0016021]; integral component of plasma membrane [GO:0005887]; melanosome membrane [GO:0033162]; plasma membrane [GO:0005886]	126000	145000	118000	112000	129000	220000	325000	320000	10	10	0.988435	0.127414	FALSE	34093.5	-0.419377	0.0435366	FALSE	non significant	0.643838
656	493	P50990	CCT8	ENSG00000156261:CCT8	T-complex protein 1 subunit theta OS=Homo sapiens OX=9606 GN=CCT8 PE=1 SV=4	azurophil granule lumen [GO:0035578]; cell body [GO:0044297]; centrosome [GO:0005813]; chaperonin-containing T-complex [GO:0005832]; cilium [GO:0005929]; cytoplasm [GO:0005737]; cytosol [GO:0005829]; extracellular exosome [GO:0070062]; extracellular region [GO:0005576]; ficolin-1-rich granule lumen [GO:1904813]; intermediate filament cytoskeleton [GO:0045111]; microtubule [GO:0005874]; nucleoplas…	96000	104000	86000	94800	110000	126000	99500	116000	14	14	0.245693	0.0945326	FALSE	17738.5	-0.308255	0.266984	FALSE	non significant	0.275202
552	648	Q14847	LASP1	ENSG00000002834:LASP1	LIM and SH3 domain protein 1 OS=Homo sapiens OX=9606 GN=LASP1 PE=1 SV=2	cortical actin cytoskeleton [GO:0030864]; cytoplasm [GO:0005737]; focal adhesion [GO:0005925]	226000	216000	247000	242000	241000	227000	135000	146000	11	11	-0.313815	0.294223	FALSE	30960.8	-0.838476	1.65255e-08	FALSE	non significant	0.512959
736	706	Q96HC4	PDLIM5	ENSG00000163110:PDLIM5	PDZ and LIM domain protein 5 OS=Homo sapiens OX=9606 GN=PDLIM5 PE=1 SV=5	Z disc [GO:0030018]; actin cytoskeleton [GO:0015629]; cell-cell adherens junction [GO:0005913]; cytosol [GO:0005829]; filamentous actin [GO:0031941]; membrane [GO:0016020]; neuron projection [GO:0043005]; postsynaptic density [GO:0014069]; postsynaptic membrane [GO:0045211]; stress fiber [GO:0001725]	108000	104000	97500	118000	97300	70200	67400	90000	8	8	-0.395929	0.103317	FALSE	22035.5	-0.600356	0.065187	FALSE	non significant	0.487543
726	575	Q03169	TNFAIP2	ENSG00000185215:TNFAIP2	Tumor necrosis factor alpha-induced protein 2 OS=Homo sapiens OX=9606 GN=TNFAIP2 PE=2 SV=2	exocyst [GO:0000145]; extracellular space [GO:0005615]	93600	98000	65600	68800	81800	69400	46600	64500	8	8	-0.313654	0.311725	FALSE	8915.15	0.519685	0.0262661	FALSE	non significant	0.403734
654	815	Q00839	HNRNPU	ENSG00000153187:HNRNPU	Heterogeneous nuclear ribonucleoprotein U OS=Homo sapiens OX=9606 GN=HNRNPU PE=1 SV=6	CRD-mediated mRNA stability complex [GO:0070937]; catalytic step 2 spliceosome [GO:0071013]; cell surface [GO:0009986]; centrosome [GO:0005813]; condensed chromosome kinetochore [GO:0000777]; cytoplasmic ribonucleoprotein granule [GO:0036464]; dendrite cytoplasm [GO:0032839]; inactive sex chromosome [GO:0098577]; kinetochore [GO:0000776]; membrane [GO:0016020]; midbody [GO:0030496]; mitotic spind…	99600	106000	95900	105000	135000	138000	113000	99700	8	8	0.25681	0.198691	FALSE	37540.1	0.090422	0.738993	FALSE	non significant	0.152385
913	906	P04181	OAT	ENSG00000065154:OAT	Ornithine aminotransferase mitochondrial OS=Homo sapiens OX=9606 GN=OAT PE=1 SV=1	cytoplasm [GO:0005737]; mitochondrial matrix [GO:0005759]; mitochondrion [GO:0005739]; nucleoplasm [GO:0005654]	44700	49200	77900	66600	91900	89700	133000	89600	5	5	0.761685	0.0587045	FALSE	11620.4	-0.554447	0.0430485	FALSE	non significant	0.649857
798	523	Q9HAU0	PLEKHA5	ENSG00000052126:PLEKHA5	Pleckstrin homology domain-containing family A member 5 OS=Homo sapiens OX=9606 GN=PLEKHA5 PE=1 SV=1	cytosol [GO:0005829]; glutamatergic synapse [GO:0098978]; membrane [GO:0016020]; nucleoplasm [GO:0005654]; postsynaptic density [GO:0014069]	138000	146000	92400	142000	135000	85600	97300	104000	12	12	-0.297165	0.311725	FALSE	3614.05	0.282177	0.412249	FALSE	non significant	0.289574
773	666	Q04837	SSBP1	ENSG00000106028:SSBP1	Single-stranded DNA-binding protein mitochondrial OS=Homo sapiens OX=9606 GN=SSBP1 PE=1 SV=1	extracellular exosome [GO:0070062]; mitochondrial matrix [GO:0005759]; mitochondrial nucleoid [GO:0042645]; mitochondrion [GO:0005739]; nucleus [GO:0005634]	45900	56600	82500	58200	66900	68400	114000	101000	7	7	0.526448	0.179002	FALSE	6175.28	-0.145471	0.667802	FALSE	non significant	0.276736
743	749	P37802	TAGLN2	ENSG00000158710:TAGLN2	Transgelin-2 OS=Homo sapiens OX=9606 GN=TAGLN2 PE=1 SV=3	cytosol [GO:0005829]; extracellular exosome [GO:0070062]; extracellular region [GO:0005576]; vesicle [GO:0031982]	76800	65600	109000	94700	73900	70300	56700	56200	7	7	-0.428859	0.16173	FALSE	31896.4	-0.632372	0.00536003	FALSE	non significant	0.520767
450	536	P27348	YWHAQ	ENSG00000134308:YWHAQ	14-3-3 protein theta OS=Homo sapiens OX=9606 GN=YWHAQ PE=1 SV=1	cytoplasm [GO:0005737]; cytosol [GO:0005829]; extracellular exosome [GO:0070062]; focal adhesion [GO:0005925]; membrane [GO:0016020]; mitochondrion [GO:0005739]; protein-containing complex [GO:0032991]; synapse [GO:0045202]	78100	92900	126000	118000	42600	44900	67900	77300	9	3	-0.83464	0.0630764	FALSE	22923.6	-0.121716	0.712408	FALSE	non significant	0.31873
679	576	Q9H4M9	EHD1	ENSG00000110047:EHD1	EH domain-containing protein 1 OS=Homo sapiens OX=9606 GN=EHD1 PE=1 SV=2	ciliary pocket membrane [GO:0020018]; early endosome membrane [GO:0031901]; endosome membrane [GO:0010008]; extracellular exosome [GO:0070062]; lipid droplet [GO:0005811]; membrane [GO:0016020]; plasma membrane [GO:0005886]; platelet dense tubular network membrane [GO:0031095]; recycling endosome membrane [GO:0055038]	48500	54500	62000	60400	41700	48900	37800	46400	10	7	-0.366782	0.0605039	FALSE	7876.12	-1.00859	2.64449e-13	TRUE	significant by RNA only	0.608221
776	818	P30519	HMOX2	ENSG00000103415:HMOX2	Heme oxygenase 2 OS=Homo sapiens OX=9606 GN=HMOX2 PE=1 SV=2	endoplasmic reticulum membrane [GO:0005789]; membrane [GO:0016020]; plasma membrane [GO:0005886]; specific granule membrane [GO:0035579]	54300	67000	50800	57000	57600	63000	67500	57800	7	6	0.102094	0.449468	FALSE	2377.69	-0.515465	0.006087	FALSE	non significant	0.229404
836	773	Q15811	ITSN1	ENSG00000205726:ITSN1	Intersectin-1 OS=Homo sapiens OX=9606 GN=ITSN1 PE=1 SV=3	apical dendrite [GO:0097440]; calyx of Held [GO:0044305]; cell junction [GO:0030054]; clathrin-coated pit [GO:0005905]; cytoplasm [GO:0005737]; cytosol [GO:0005829]; dendritic spine [GO:0043197]; endocytic vesicle [GO:0030139]; glutamatergic synapse [GO:0098978]; lamellipodium [GO:0030027]; neuronal cell body [GO:0043025]; nuclear envelope [GO:0005635]; plasma membrane [GO:0005886]; postsynaptic …	22000	29100	24400	25600	15000	17000	18000	20200	7	6	-0.52624	0.029892	FALSE	6566.87	-1.09116	5.75021e-07	TRUE	significant by RNA only	0.757767
849	538	Q14444	CAPRIN1	ENSG00000135387:CAPRIN1	Caprin-1 OS=Homo sapiens OX=9606 GN=CAPRIN1 PE=1 SV=2	P-body [GO:0000932]; cytoplasmic stress granule [GO:0010494]; cytosol [GO:0005829]; dendrite [GO:0030425]; membrane [GO:0016020]; synapse [GO:0045202]	48600	58600	72100	62700	67500	46000	67600	44800	8	8	-0.0993228	0.690807	FALSE	30592.4	-0.0374998	0.912713	FALSE	non significant	0.0610294
597	686	Q658P3	STEAP3	ENSG00000115107:STEAP3	Metalloreductase STEAP3 OS=Homo sapiens OX=9606 GN=STEAP3 PE=1 SV=2	cytoplasm [GO:0005737]; endosome [GO:0005768]; endosome membrane [GO:0010008]; integral component of membrane [GO:0016021]; multivesicular body [GO:0005771]; plasma membrane [GO:0005886]	107000	111000	101000	93100	83500	78700	74700	68200	6	6	-0.433712	0.0177385	FALSE	10604.1	0.779376	0.0124542	FALSE	non significant	0.581399
435	625	O75947	ATP5H	ENSG00000167863:ATP5H	ATP synthase subunit d mitochondrial OS=Homo sapiens OX=9606 GN=ATP5H PE=1 SV=3	mitochondrial inner membrane [GO:0005743]; mitochondrial proton-transporting ATP synthase complex [GO:0005753]; mitochondrial proton-transporting ATP synthase, stator stalk [GO:0000274]; mitochondrion [GO:0005739]; nucleoplasm [GO:0005654]	214000	230000	286000	271000	201000	211000	239000	223000	15	15	-0.195737	0.254205	FALSE	6820.19	-0.360441	0.259782	FALSE	non significant	0.265615
721	784	Q15043	SLC39A14	ENSG00000104635:SLC39A14	Zinc transporter ZIP14 OS=Homo sapiens OX=9606 GN=SLC39A14 PE=1 SV=3	cytoplasm [GO:0005737]; integral component of membrane [GO:0016021]; integral component of plasma membrane [GO:0005887]; lamellipodium [GO:0030027]; plasma membrane [GO:0005886]	79700	88500	72100	71800	87300	83600	70500	67000	7	7	-0.0172056	0.909328	FALSE	28135.3	0.149541	0.713762	FALSE	non significant	0.0507241
616	682	Q9UBQ0	VPS29	ENSG00000111237:VPS29	Vacuolar protein sorting-associated protein 29 OS=Homo sapiens OX=9606 GN=VPS29 PE=1 SV=1	cytosol [GO:0005829]; early endosome [GO:0005769]; endosome [GO:0005768]; endosome membrane [GO:0010008]; intracellular membrane-bounded organelle [GO:0043231]; late endosome [GO:0005770]; retromer complex [GO:0030904]; retromer, cargo-selective complex [GO:0030906]	295000	303000	310000	305000	184000	237000	336000	341000	7	7	-0.143701	0.5454	FALSE	3793.76	-0.625756	0.00175759	FALSE	non significant	0.29987
785	928	P62244	RPS15A	ENSG00000134419:RPS15A	40S ribosomal protein S15a OS=Homo sapiens OX=9606 GN=RPS15A PE=1 SV=2	cytoplasm [GO:0005737]; cytosol [GO:0005829]; cytosolic small ribosomal subunit [GO:0022627]; extracellular exosome [GO:0070062]; membrane [GO:0016020]; nucleoplasm [GO:0005654]	166000	155000	206000	181000	129000	112000	171000	126000	7	7	-0.396143	0.106504	FALSE	23435.7	0.191089	0.674244	FALSE	non significant	0.275134
805	1096	P61163	ACTR1A	ENSG00000138107:ACTR1A	Alpha-centractin OS=Homo sapiens OX=9606 GN=ACTR1A PE=1 SV=1	COPI-coated vesicle [GO:0030137]; cell cortex region [GO:0099738]; centriole [GO:0005814]; centrosome [GO:0005813]; cytoplasm [GO:0005737]; cytosol [GO:0005829]; dynactin complex [GO:0005869]; extracellular exosome [GO:0070062]; manchette [GO:0002177]; microtubule associated complex [GO:0005875]; microtubule cytoskeleton [GO:0015630]	13900	14800	12700	12500	22400	24000	17500	16600	7	5	0.578704	0.055396	FALSE	10842.4	-0.383437	0.00140306	FALSE	non significant	0.471059
259	910	Q86YS6	RAB43	ENSG00000172780:RAB43	Ras-related protein Rab-43 OS=Homo sapiens OX=9606 GN=RAB43 PE=1 SV=1	Golgi apparatus [GO:0005794]; Golgi membrane [GO:0000139]; endoplasmic reticulum membrane [GO:0005789]; extracellular exosome [GO:0070062]; phagocytic vesicle [GO:0045335]; phagocytic vesicle membrane [GO:0030670]; trans-Golgi network membrane [GO:0032588]	10100	12600	12400	11900	12800	17200	14600	15000	7	3	0.342652	0.0721683	FALSE	4681.08	0.144255	0.55694	FALSE	non significant	0.222327
739	573	P61978	HNRNPK	ENSG00000165119:HNRNPK	Heterogeneous nuclear ribonucleoprotein K OS=Homo sapiens OX=9606 GN=HNRNPK PE=1 SV=1	catalytic step 2 spliceosome [GO:0071013]; cell projection [GO:0042995]; cytoplasm [GO:0005737]; cytoplasmic stress granule [GO:0010494]; extracellular exosome [GO:0070062]; focal adhesion [GO:0005925]; membrane [GO:0016020]; nuclear chromatin [GO:0000790]; nucleoplasm [GO:0005654]; nucleus [GO:0005634]; podosome [GO:0002102]	82100	94400	93600	95900	114000	113000	108000	108000	8	8	0.275463	0.0364426	FALSE	42161.5	-0.188169	0.307824	FALSE	non significant	0.22767
569	774	Q01518	CAP1	ENSG00000131236:CAP1	Adenylyl cyclase-associated protein 1 OS=Homo sapiens OX=9606 GN=CAP1 PE=1 SV=5	azurophil granule lumen [GO:0035578]; cortical actin cytoskeleton [GO:0030864]; extracellular exosome [GO:0070062]; extracellular region [GO:0005576]; focal adhesion [GO:0005925]; plasma membrane [GO:0005886]	68400	72800	83100	75000	83200	125000	84000	73700	6	6	0.289857	0.318428	FALSE	45424.9	-0.472505	0.00170573	FALSE	non significant	0.37008
586	545	P20908	COL5A1	ENSG00000130635:COL5A1	Collagen alpha-1(V) chain OS=Homo sapiens OX=9606 GN=COL5A1 PE=1 SV=3	basement membrane [GO:0005604]; collagen type V trimer [GO:0005588]; collagen-containing extracellular matrix [GO:0062023]; endoplasmic reticulum lumen [GO:0005788]; extracellular matrix [GO:0031012]; extracellular region [GO:0005576]; extracellular space [GO:0005615]	124000	146000	152000	126000	102000	82700	120000	115000	9	6	-0.384817	0.0950866	FALSE	74117.3	-0.0471118	0.974642	FALSE	non significant	0.134646
376	778	Q15758	SLC1A5	ENSG00000105281:SLC1A5	Neutral amino acid transporter B(0) OS=Homo sapiens OX=9606 GN=SLC1A5 PE=1 SV=2	extracellular exosome [GO:0070062]; integral component of membrane [GO:0016021]; integral component of plasma membrane [GO:0005887]; melanosome [GO:0042470]; membrane [GO:0016020]; plasma membrane [GO:0005886]	304000	282000	286000	243000	407000	553000	353000	418000	8	8	0.634562	0.0467698	FALSE	16121.5	-0.350635	0.444645	FALSE	non significant	0.471699
713	619	O60568	PLOD3	ENSG00000106397:PLOD3	Procollagen-lysine 2-oxoglutarate 5-dioxygenase 3 OS=Homo sapiens OX=9606 GN=PLOD3 PE=1 SV=1	Golgi apparatus [GO:0005794]; collagen-containing extracellular matrix [GO:0062023]; endoplasmic reticulum [GO:0005783]; endoplasmic reticulum lumen [GO:0005788]; endoplasmic reticulum membrane [GO:0005789]; extracellular exosome [GO:0070062]; extracellular space [GO:0005615]; rough endoplasmic reticulum [GO:0005791]; trans-Golgi network [GO:0005802]	97800	123000	166000	146000	124000	116000	116000	113000	9	9	-0.184006	0.518643	FALSE	15010.6	0.493585	0.142015	FALSE	non significant	0.301368
811	816	Q99653	CHP1	ENSG00000187446:CHP1	Calcineurin B homologous protein 1 OS=Homo sapiens OX=9606 GN=CHP1 PE=1 SV=3	Golgi membrane [GO:0000139]; cytoplasm [GO:0005737]; cytosol [GO:0005829]; endoplasmic reticulum [GO:0005783]; endoplasmic reticulum-Golgi intermediate compartment [GO:0005793]; extracellular exosome [GO:0070062]; focal adhesion [GO:0005925]; microtubule cytoskeleton [GO:0015630]; nucleus [GO:0005634]; plasma membrane [GO:0005886]; transport vesicle [GO:0030133]	114000	112000	94100	85700	62400	81100	80300	88900	8	7	-0.37599	0.103199	FALSE	7181.29	-0.220109	0.434046	FALSE	non significant	0.287678
954	847	Q8N3E9	PLCD3	ENSG00000161714:PLCD3	1-phosphatidylinositol 4 5-bisphosphate phosphodiesterase delta-3 OS=Homo sapiens OX=9606 GN=PLCD3 PE=1 SV=3	cleavage furrow [GO:0032154]; cytosol [GO:0005829]; plasma membrane [GO:0005886]	27500	26600	19100	21400	22800	34000	21000	21200	4	4	0.0655883	0.869184	FALSE	3361.58	-0.0237999	0.946437	FALSE	non significant	0.0395095
884	1373	Q9UIQ6	LNPEP	ENSG00000113441:LNPEP	Leucyl-cystinyl aminopeptidase OS=Homo sapiens OX=9606 GN=LNPEP PE=1 SV=3	cytoplasm [GO:0005737]; cytoplasmic vesicle membrane [GO:0030659]; cytosol [GO:0005829]; early endosome lumen [GO:0031905]; extracellular region [GO:0005576]; integral component of plasma membrane [GO:0005887]; lysosomal membrane [GO:0005765]; membrane [GO:0016020]; perinuclear region of cytoplasm [GO:0048471]	17600	19100	12800	13000	21700	21400	16500	13200	4	4	0.220082	0.490588	FALSE	19325.3	-0.409831	0.151172	FALSE	non significant	0.300327
401	882	Q9UL26	RAB22A	ENSG00000124209:RAB22A	Ras-related protein Rab-22A OS=Homo sapiens OX=9606 GN=RAB22A PE=1 SV=2	actin cytoskeleton [GO:0015629]; early endosome [GO:0005769]; endosome membrane [GO:0010008]; extracellular exosome [GO:0070062]; late endosome [GO:0005770]; phagocytic vesicle [GO:0045335]; phagocytic vesicle membrane [GO:0030670]; plasma membrane [GO:0005886]; ruffle [GO:0001726]	22600	18900	15600	17600	30600	29300	23500	25800	10	4	0.547793	0.0390244	FALSE	5309.62	-0.404344	0.0461002	FALSE	non significant	0.470635
669	683	P35606	COPB2	ENSG00000184432:COPB2	Coatomer subunit beta' OS=Homo sapiens OX=9606 GN=COPB2 PE=1 SV=2	COPI vesicle coat [GO:0030126]; Golgi membrane [GO:0000139]; cytosol [GO:0005829]; endoplasmic reticulum membrane [GO:0005789]; transport vesicle [GO:0030133]	105000	117000	118000	120000	110000	132000	170000	130000	9	9	0.236659	0.289086	FALSE	21820.1	-0.431512	0.00391719	FALSE	non significant	0.319564
803	662	P35611	ADD1	ENSG00000087274:ADD1	Alpha-adducin OS=Homo sapiens OX=9606 GN=ADD1 PE=1 SV=2	F-actin capping protein complex [GO:0008290]; cell-cell adherens junction [GO:0005913]; cytoplasm [GO:0005737]; cytoskeleton [GO:0005856]; cytosol [GO:0005829]; focal adhesion [GO:0005925]; nuclear body [GO:0016604]; nucleoplasm [GO:0005654]; nucleus [GO:0005634]; plasma membrane [GO:0005886]; plasma membrane raft [GO:0044853]; postsynaptic density [GO:0014069]	60900	66800	64700	67300	82900	101000	57900	54700	5	5	0.191186	0.637848	FALSE	15016	-0.107665	0.660925	FALSE	non significant	0.143472
3921	4305	A1KZ92	PXDNL	ENSG00000147485:PXDNL	Peroxidasin-like protein OS=Homo sapiens OX=9606 GN=PXDNL PE=1 SV=3	cytoplasm [GO:0005737]; extracellular space [GO:0005615]	5710	5970	6090	8390	2650	1700	1910	3000	1	1	-1.49828	0.0137628	TRUE	45.9014	-1.69201	0.000113042	FALSE	significant by MS only	1.5922
838	684	O43615	TIMM44	ENSG00000104980:TIMM44	Mitochondrial import inner membrane translocase subunit TIM44 OS=Homo sapiens OX=9606 GN=TIMM44 PE=1 SV=2	mitochondrial inner membrane [GO:0005743]; mitochondrial matrix [GO:0005759]; mitochondrion [GO:0005739]	116000	135000	132000	125000	141000	119000	140000	126000	9	9	0.0502343	0.645135	FALSE	2748.41	-0.374183	0.0275546	FALSE	non significant	0.137101
630	510	Q99623	PHB2	ENSG00000215021:PHB2	Prohibitin-2 OS=Homo sapiens OX=9606 GN=PHB2 PE=1 SV=2	GABA-ergic synapse [GO:0098982]; axon [GO:0030424]; cell periphery [GO:0071944]; cell surface [GO:0009986]; cytoplasm [GO:0005737]; glutamatergic synapse [GO:0098978]; mitochondrial inner membrane [GO:0005743]; mitochondrial outer membrane [GO:0005741]; mitochondrion [GO:0005739]; nuclear matrix [GO:0016363]; nucleus [GO:0005634]; postsynaptic density [GO:0014069]; presynaptic active zone [GO:004…	163000	206000	232000	260000	219000	167000	195000	214000	13	13	-0.115058	0.665424	FALSE	17595.3	0.45278	0.144791	FALSE	non significant	0.228246
863	798	O95881	TXNDC12	ENSG00000117862:TXNDC12	Thioredoxin domain-containing protein 12 OS=Homo sapiens OX=9606 GN=TXNDC12 PE=1 SV=1	endoplasmic reticulum [GO:0005783]; endoplasmic reticulum lumen [GO:0005788]	108000	134000	128000	129000	81400	118000	148000	165000	6	6	0.0382307	0.98657	FALSE	5639.8	-0.391156	0.16736	FALSE	non significant	0.122287
636	612	Q14141	2019-09-06	ENSG00000125354:SEPT6	Septin-6 OS=Homo sapiens OX=9606 GN=SEPT6 PE=1 SV=4	axon terminus [GO:0043679]; cleavage furrow [GO:0032154]; condensed chromosome kinetochore [GO:0000777]; microtubule cytoskeleton [GO:0015630]; midbody [GO:0030496]; septin collar [GO:0032173]; septin complex [GO:0031105]; septin ring [GO:0005940]; sperm annulus [GO:0097227]; spindle [GO:0005819]; synaptic vesicle [GO:0008021]	11300	8300	9570	7800	11400	13100	9870	7840	8	1	0.19123	0.504291	FALSE	1894.79	-0.217227	0.574057	FALSE	non significant	0.203814
910	735	Q99613	EIF3C	ENSG00000184110:EIF3C	Eukaryotic translation initiation factor 3 subunit C OS=Homo sapiens OX=9606 GN=EIF3C PE=1 SV=1	cytosol [GO:0005829]; eukaryotic 43S preinitiation complex [GO:0016282]; eukaryotic 48S preinitiation complex [GO:0033290]; eukaryotic translation initiation factor 3 complex [GO:0005852]	21200	23100	25000	25100	9900	10300	15400	14700	5	4	-0.908228	0.035983	FALSE	14055	-0.174936	0.289476	FALSE	non significant	0.3986
910	736	B5ME19	EIF3CL	ENSG00000205609:EIF3CL	Eukaryotic translation initiation factor 3 subunit C-like protein OS=Homo sapiens OX=9606 GN=EIF3CL PE=3 SV=1	eukaryotic 43S preinitiation complex [GO:0016282]; eukaryotic 48S preinitiation complex [GO:0033290]; eukaryotic translation initiation factor 3 complex [GO:0005852]	21200	23100	25000	25100	9900	10300	15400	14700	5	4	-0.908228	0.035983	FALSE	22484.9	-0.218199	0.127091	FALSE	non significant	0.445168
783	744	O00592	PODXL	ENSG00000128567:PODXL	Podocalyxin OS=Homo sapiens OX=9606 GN=PODXL PE=1 SV=2	apical plasma membrane [GO:0016324]; cytoplasm [GO:0005737]; extracellular exosome [GO:0070062]; extracellular space [GO:0005615]; filopodium [GO:0030175]; integral component of plasma membrane [GO:0005887]; intracellular membrane-bounded organelle [GO:0043231]; lamellipodium [GO:0030027]; membrane raft [GO:0045121]; microtubule organizing center [GO:0005815]; microvillus membrane [GO:0031528]; n…	73000	71400	50100	62100	52600	57800	50100	60900	6	6	-0.212866	0.321077	FALSE	3679.39	-0.443297	0.53133	FALSE	non significant	0.307185
554	1199	Q9GZM5	YIPF3	ENSG00000137207:YIPF3	Protein YIPF3 OS=Homo sapiens OX=9606 GN=YIPF3 PE=1 SV=1	Golgi apparatus [GO:0005794]; integral component of membrane [GO:0016021]; intracellular membrane-bounded organelle [GO:0043231]; plasma membrane [GO:0005886]; transport vesicle [GO:0030133]	95900	103000	97000	84200	223000	212000	136000	121000	7	7	0.864393	0.0821493	FALSE	7619.05	-0.0929767	0.731162	FALSE	non significant	0.283493
1044	762	O95487	SEC24B	ENSG00000138802:SEC24B	Protein transport protein Sec24B OS=Homo sapiens OX=9606 GN=SEC24B PE=1 SV=2	COPII vesicle coat [GO:0030127]; ER to Golgi transport vesicle membrane [GO:0012507]; Golgi membrane [GO:0000139]; cytosol [GO:0005829]; endoplasmic reticulum membrane [GO:0005789]	18600	22700	20400	20400	23600	28600	25200	24600	5	5	0.313115	0.0406407	FALSE	3470.93	-0.144496	0.696718	FALSE	non significant	0.212706
2160	3039	P48201	ATP5G3	ENSG00000154518:ATP5G3	ATP synthase F(0) complex subunit C3 mitochondrial OS=Homo sapiens OX=9606 GN=ATP5MC3 PE=2 SV=1	integral component of membrane [GO:0016021]; mitochondrial outer membrane [GO:0005741]; mitochondrial proton-transporting ATP synthase complex, coupling factor F(o) [GO:0000276]; proton-transporting ATP synthase complex, coupling factor F(o) [GO:0045263]	11300	12800	11200	7890	69900	55800	79500	94800	1	1	2.79619	0.00229584	TRUE	6924.26	-0.879845	0.00102107	FALSE	significant by MS only	1.56851
800	881	Q8N766	EMC1	ENSG00000127463:EMC1	ER membrane protein complex subunit 1 OS=Homo sapiens OX=9606 GN=EMC1 PE=1 SV=1	ER membrane protein complex [GO:0072546]; integral component of membrane [GO:0016021]; protein-containing complex [GO:0032991]	40300	43600	45200	39600	72600	65600	56800	53500	6	6	0.558786	0.0331793	FALSE	15746.7	-0.30788	0.327862	FALSE	non significant	0.414776
963	654	Q9Y5K8	ATP6V1D	ENSG00000100554:ATP6V1D	V-type proton ATPase subunit D OS=Homo sapiens OX=9606 GN=ATP6V1D PE=1 SV=1	cytosol [GO:0005829]; extracellular exosome [GO:0070062]; lysosomal membrane [GO:0005765]; membrane [GO:0016020]; plasma membrane [GO:0005886]; proton-transporting V-type ATPase complex [GO:0033176]; specific granule membrane [GO:0035579]	36800	37800	36600	37200	52200	54400	44500	43600	7	7	0.391762	0.0567044	FALSE	6043.54	-0.568507	0.0119194	FALSE	non significant	0.471932
869	1126	Q8ND76	CCNY	ENSG00000108100:CCNY	Cyclin-Y OS=Homo sapiens OX=9606 GN=CCNY PE=1 SV=2	cytoplasmic cyclin-dependent protein kinase holoenzyme complex [GO:0000308]; nucleus [GO:0005634]; plasma membrane [GO:0005886]	47000	47400	37300	35600	19800	24300	28200	25700	6	5	-0.771584	0.0192659	FALSE	5805.75	-0.349397	0.0775545	FALSE	non significant	0.519219
818	646	P17813	ENG	ENSG00000106991:ENG	Endoglin OS=Homo sapiens OX=9606 GN=ENG PE=1 SV=2	cell surface [GO:0009986]; endothelial microparticle [GO:0072563]; external side of plasma membrane [GO:0009897]; extracellular space [GO:0005615]; focal adhesion [GO:0005925]; integral component of membrane [GO:0016021]; receptor complex [GO:0043235]	105000	105000	81000	103000	70000	67300	81400	91500	8	8	-0.344997	0.104839	FALSE	3894.34	0.171982	0.786533	FALSE	non significant	0.243584
1031	761	P52209	PGD	ENSG00000142657:PGD	6-phosphogluconate dehydrogenase decarboxylating OS=Homo sapiens OX=9606 GN=PGD PE=1 SV=3	cytosol [GO:0005829]; extracellular exosome [GO:0070062]; nucleus [GO:0005634]	22100	17500	24600	24600	18800	26900	28800	25600	5	5	0.17281	0.491613	FALSE	9944.58	-0.0299282	0.926221	FALSE	non significant	0.071916
644	1328	P62847	RPS24	ENSG00000138326:RPS24	40S ribosomal protein S24 OS=Homo sapiens OX=9606 GN=RPS24 PE=1 SV=1	cytosol [GO:0005829]; cytosolic small ribosomal subunit [GO:0022627]; membrane [GO:0016020]; nucleoplasm [GO:0005654]; nucleus [GO:0005634]; small ribosomal subunit [GO:0015935]	111000	107000	109000	110000	269000	209000	198000	171000	8	8	0.954729	0.0323394	FALSE	32488.6	0.358579	0.355924	FALSE	non significant	0.585103
652	868	Q13283	G3BP1	ENSG00000145907:G3BP1	Ras GTPase-activating protein-binding protein 1 OS=Homo sapiens OX=9606 GN=G3BP1 PE=1 SV=1	cytoplasm [GO:0005737]; cytoplasmic stress granule [GO:0010494]; cytosol [GO:0005829]; focal adhesion [GO:0005925]; nucleus [GO:0005634]; perikaryon [GO:0043204]; ribonucleoprotein complex [GO:1990904]	52300	57700	60200	53100	137000	87700	114000	89400	7	7	0.938965	0.0331532	FALSE	19791.3	-0.016523	0.950429	FALSE	non significant	0.124557
749	717	Q9H4G0	EPB41L1	ENSG00000088367:EPB41L1	Band 4.1-like protein 1 OS=Homo sapiens OX=9606 GN=EPB41L1 PE=1 SV=2	cytoskeleton [GO:0005856]; cytosol [GO:0005829]; plasma membrane [GO:0005886]	112000	82600	74500	77800	112000	58900	68500	65700	8	6	-0.185238	0.526945	FALSE	3183.43	0.626188	0.026869	FALSE	non significant	0.340578
420	616	P62280	RPS11	ENSG00000142534:RPS11	40S ribosomal protein S11 OS=Homo sapiens OX=9606 GN=RPS11 PE=1 SV=3	cytoplasm [GO:0005737]; cytosol [GO:0005829]; cytosolic small ribosomal subunit [GO:0022627]; extracellular exosome [GO:0070062]; focal adhesion [GO:0005925]; membrane [GO:0016020]; nucleolus [GO:0005730]; nucleoplasm [GO:0005654]; ribosome [GO:0005840]	504000	538000	677000	585000	520000	487000	617000	488000	9	9	-0.125531	0.459416	FALSE	44676.4	0.495352	0.229813	FALSE	non significant	0.249363
864	933	P99999	CYCS	ENSG00000172115:CYCS	Cytochrome c OS=Homo sapiens OX=9606 GN=CYCS PE=1 SV=2	cytosol [GO:0005829]; mitochondrial inner membrane [GO:0005743]; mitochondrial intermembrane space [GO:0005758]; mitochondrion [GO:0005739]; nucleus [GO:0005634]; protein phosphatase type 2A complex [GO:0000159]; respirasome [GO:0070469]	91300	119000	201000	208000	90400	95400	125000	87700	6	6	-0.636059	0.241898	FALSE	8781.62	-1.15973	9.49846e-07	TRUE	significant by RNA only	0.858871
258	1407	Q9BZG1	RAB34	ENSG00000109113:RAB34	Ras-related protein Rab-34 OS=Homo sapiens OX=9606 GN=RAB34 PE=1 SV=1	Golgi apparatus [GO:0005794]; Golgi cisterna [GO:0031985]; Golgi stack [GO:0005795]; cilium [GO:0005929]; extracellular exosome [GO:0070062]; perinuclear region of cytoplasm [GO:0048471]; phagocytic vesicle [GO:0045335]; phagocytic vesicle membrane [GO:0030670]; vesicle [GO:0031982]	11200	12100	15000	19000	23600	22100	14800	14600	6	2	0.390278	0.276464	FALSE	10280.2	0.0917784	0.773938	FALSE	non significant	0.189259
1011	955	Q9P2E5	CHPF2	ENSG00000033100:CHPF2	Chondroitin sulfate glucuronyltransferase OS=Homo sapiens OX=9606 GN=CHPF2 PE=2 SV=2	Golgi cisterna membrane [GO:0032580]; Golgi membrane [GO:0000139]; integral component of membrane [GO:0016021]; membrane [GO:0016020]	26300	32000	20900	20600	44600	47800	22600	28100	5	5	0.519912	0.278982	FALSE	11980.2	-0.303749	0.303462	FALSE	non significant	0.397395
687	988	O75477	ERLIN1	ENSG00000107566:ERLIN1	Erlin-1 OS=Homo sapiens OX=9606 GN=ERLIN1 PE=1 SV=1	endoplasmic reticulum [GO:0005783]; endoplasmic reticulum membrane [GO:0005789]; integral component of membrane [GO:0016021]; protein-containing complex [GO:0032991]	34600	35000	34000	29500	105000	106000	57000	46200	5	3	1.23917	0.0825202	FALSE	5859.61	-0.250702	0.429857	FALSE	non significant	0.557371
665	924	P05387	RPLP2	ENSG00000177600:RPLP2	60S acidic ribosomal protein P2 OS=Homo sapiens OX=9606 GN=RPLP2 PE=1 SV=1	cytosol [GO:0005829]; cytosolic large ribosomal subunit [GO:0022625]; extracellular exosome [GO:0070062]; focal adhesion [GO:0005925]; membrane [GO:0016020]; synapse [GO:0045202]	64600	78500	99500	87500	70100	65800	98400	82600	5	5	-0.0588755	0.825653	FALSE	23314.3	0.500086	0.285975	FALSE	non significant	0.171589
487	754	Q9UBR2	CTSZ	ENSG00000101160:CTSZ	Cathepsin Z OS=Homo sapiens OX=9606 GN=CTSZ PE=1 SV=1	COPII-coated ER to Golgi transport vesicle [GO:0030134]; Golgi membrane [GO:0000139]; cell cortex region [GO:0099738]; cell surface [GO:0009986]; collagen-containing extracellular matrix [GO:0062023]; cytoplasmic vesicle [GO:0031410]; endoplasmic reticulum [GO:0005783]; endoplasmic reticulum lumen [GO:0005788]; endoplasmic reticulum-Golgi intermediate compartment membrane [GO:0033116]; extracellu…	239000	255000	267000	251000	393000	386000	438000	495000	10	10	0.758473	0.0144415	FALSE	16138.7	-0.718208	0.00213936	FALSE	non significant	0.738066
703	618	O60749	SNX2	ENSG00000205302:SNX2	Sorting nexin-2 OS=Homo sapiens OX=9606 GN=SNX2 PE=1 SV=2	cytoplasm [GO:0005737]; cytosol [GO:0005829]; early endosome membrane [GO:0031901]; endosome [GO:0005768]; endosome membrane [GO:0010008]; lamellipodium [GO:0030027]; lysosome [GO:0005764]; membrane [GO:0016020]; protein-containing complex [GO:0032991]; retromer complex [GO:0030904]; retromer, tubulation complex [GO:0030905]	90900	131000	80100	88500	78600	79200	74200	111000	9	9	-0.187114	0.517324	FALSE	5814.24	-1.10224	7.68467e-08	TRUE	significant by RNA only	0.454142
326	647	P46781	RPS9	ENSG00000170889:RPS9	40S ribosomal protein S9 OS=Homo sapiens OX=9606 GN=RPS9 PE=1 SV=3	cytoplasm [GO:0005737]; cytosol [GO:0005829]; cytosolic small ribosomal subunit [GO:0022627]; extracellular exosome [GO:0070062]; focal adhesion [GO:0005925]; membrane [GO:0016020]; nucleolus [GO:0005730]; nucleoplasm [GO:0005654]; nucleus [GO:0005634]; ribonucleoprotein complex [GO:1990904]; ribosome [GO:0005840]; synapse [GO:0045202]	512000	554000	599000	633000	476000	444000	510000	459000	16	16	-0.282756	0.055973	FALSE	24919.7	0.234891	0.590456	FALSE	non significant	0.257714
544	734	Q00325	SLC25A3	ENSG00000075415:SLC25A3	Phosphate carrier protein mitochondrial OS=Homo sapiens OX=9606 GN=SLC25A3 PE=1 SV=2	extracellular exosome [GO:0070062]; integral component of mitochondrial inner membrane [GO:0031305]; integral component of plasma membrane [GO:0005887]; membrane [GO:0016020]; mitochondrial inner membrane [GO:0005743]; mitochondrion [GO:0005739]	273000	304000	344000	332000	167000	142000	260000	266000	12	12	-0.585538	0.134636	FALSE	30033.7	-0.517253	0.000433642	FALSE	non significant	0.550337
1068	1205	Q9Y3I0	RTCB	ENSG00000100220:RTCB	tRNA-splicing ligase RtcB homolog OS=Homo sapiens OX=9606 GN=RTCB PE=1 SV=1	cytoplasm [GO:0005737]; cytosol [GO:0005829]; endoplasmic reticulum membrane [GO:0005789]; intracellular membrane-bounded organelle [GO:0043231]; nuclear envelope [GO:0005635]; nucleoplasm [GO:0005654]; nucleus [GO:0005634]; tRNA-splicing ligase complex [GO:0072669]	25300	28900	26000	25600	36700	39500	37300	30300	4	4	0.442724	0.0343059	FALSE	7049.04	-0.585997	0.0284979	FALSE	non significant	0.509348
596	663	O15144	ARPC2	ENSG00000163466:ARPC2	Actin-related protein 2/3 complex subunit 2 OS=Homo sapiens OX=9606 GN=ARPC2 PE=1 SV=1	Arp2/3 protein complex [GO:0005885]; actin cytoskeleton [GO:0015629]; cytosol [GO:0005829]; endosome [GO:0005768]; extracellular exosome [GO:0070062]; focal adhesion [GO:0005925]; glutamatergic synapse [GO:0098978]; lamellipodium [GO:0030027]; muscle cell projection membrane [GO:0036195]; neuron projection [GO:0043005]; nucleus [GO:0005634]; site of double-strand break [GO:0035861]	98100	114000	127000	126000	80700	99600	116000	109000	9	9	-0.198551	0.311725	FALSE	21013.6	-0.599088	0.00649314	FALSE	non significant	0.34489
1222	1384	Q6IQ23	PLEKHA7	ENSG00000166689:PLEKHA7	Pleckstrin homology domain-containing family A member 7 OS=Homo sapiens OX=9606 GN=PLEKHA7 PE=1 SV=2	cell junction [GO:0030054]; centrosome [GO:0005813]; cytosol [GO:0005829]; extracellular exosome [GO:0070062]; nucleus [GO:0005634]; pore complex [GO:0046930]; zonula adherens [GO:0005915]	22900	22300	19400	18000	11100	7670	9690	7070	3	3	-1.2171	0.0137628	TRUE	442.555	-1.83284	0.0852976	FALSE	significant by MS only	1.49357
522	767	P25445	FAS	ENSG00000026103:FAS	Tumor necrosis factor receptor superfamily member 6 OS=Homo sapiens OX=9606 GN=FAS PE=1 SV=1	CD95 death-inducing signaling complex [GO:0031265]; cell surface [GO:0009986]; cytosol [GO:0005829]; death-inducing signaling complex [GO:0031264]; extracellular exosome [GO:0070062]; integral component of membrane [GO:0016021]; membrane raft [GO:0045121]; nuclear body [GO:0016604]; plasma membrane [GO:0005886]	183000	170000	167000	164000	212000	230000	142000	141000	10	10	0.0839847	0.869184	FALSE	3679.97	0.904308	0.000993056	FALSE	non significant	0.275587
788	1182	P07919	UQCRH	ENSG00000173660:UQCRH	Cytochrome b-c1 complex subunit 6 mitochondrial OS=Homo sapiens OX=9606 GN=UQCRH PE=1 SV=2	mitochondrial inner membrane [GO:0005743]; mitochondrial respirasome [GO:0005746]; mitochondrial respiratory chain complex III [GO:0005750]; mitochondrion [GO:0005739]	60200	63800	65200	71400	59000	48400	70800	66600	6	6	-0.0902335	0.579332	FALSE	8318	0.0334486	0.958302	FALSE	non significant	0.054938
832	704	A2RRP1	NBAS	ENSG00000151779:NBAS	Neuroblastoma-amplified sequence OS=Homo sapiens OX=9606 GN=NBAS PE=1 SV=2	Dsl1/NZR complex [GO:0070939]; cytosol [GO:0005829]; endoplasmic reticulum [GO:0005783]; endoplasmic reticulum membrane [GO:0005789]; membrane [GO:0016020]	162000	130000	163000	161000	126000	145000	77600	73500	13	13	-0.545346	0.168079	FALSE	8131.6	0.143562	0.665106	FALSE	non significant	0.279805
916	1115	O75348	ATP6V1G1	ENSG00000136888:ATP6V1G1	V-type proton ATPase subunit G 1 OS=Homo sapiens OX=9606 GN=ATP6V1G1 PE=1 SV=3	cytosol [GO:0005829]; extracellular exosome [GO:0070062]; lysosomal membrane [GO:0005765]; plasma membrane [GO:0005886]; vacuolar proton-transporting V-type ATPase complex [GO:0016471]	50500	43500	46300	45400	88400	109000	61000	59800	6	6	0.77696	0.0938353	FALSE	5540.55	-1.16353	8.70379e-06	TRUE	significant by RNA only	0.950796
968	681	P49821	NDUFV1	ENSG00000167792:NDUFV1	NADH dehydrogenase [ubiquinone] flavoprotein 1 mitochondrial OS=Homo sapiens OX=9606 GN=NDUFV1 PE=1 SV=4	cytosol [GO:0005829]; mitochondrial inner membrane [GO:0005743]; mitochondrial respiratory chain complex I [GO:0005747]; mitochondrion [GO:0005739]	42700	50200	56400	56300	50900	60000	70900	63300	6	6	0.25353	0.203516	FALSE	5795.01	-0.086155	0.689729	FALSE	non significant	0.147793
500	710	P22090	RPS4Y1	ENSG00000129824:RPS4Y1	40S ribosomal protein S4 Y isoform 1 OS=Homo sapiens OX=9606 GN=RPS4Y1 PE=1 SV=2	cytosol [GO:0005829]; cytosolic small ribosomal subunit [GO:0022627]; membrane [GO:0016020]; nucleoplasm [GO:0005654]; nucleus [GO:0005634]; polysome [GO:0005844]	21200	14500	15900	15100	16100	19700	9430	7670	10	1	-0.334419	0.395382	FALSE	13812.1	0.062889	0.865381	FALSE	non significant	0.145022
638	652	O75340	PDCD6	ENSG00000249915:PDCD6	Programmed cell death protein 6 OS=Homo sapiens OX=9606 GN=PDCD6 PE=1 SV=1	COPII vesicle coat [GO:0030127]; Golgi membrane [GO:0000139]; cytoplasm [GO:0005737]; cytoplasmic vesicle [GO:0031410]; endoplasmic reticulum [GO:0005783]; endoplasmic reticulum exit site [GO:0070971]; endoplasmic reticulum membrane [GO:0005789]; endosome [GO:0005768]; extracellular exosome [GO:0070062]; nucleus [GO:0005634]	65800	82500	76800	94900	44500	47700	45700	37800	6	6	-0.864958	0.0138611	FALSE	6549.92	-0.044453	0.898424	FALSE	non significant	0.196087
961	674	O60826	CCDC22	ENSG00000101997:CCDC22	Coiled-coil domain-containing protein 22 OS=Homo sapiens OX=9606 GN=CCDC22 PE=1 SV=1	cytosol [GO:0005829]; endosome [GO:0005768]; nucleoplasm [GO:0005654]	38000	33200	36800	33900	69600	61600	53700	42300	6	6	0.679088	0.0606109	FALSE	1034.36	-0.255116	0.339058	FALSE	non significant	0.416229
471	1001	P42766	RPL35	ENSG00000136942:RPL35	60S ribosomal protein L35 OS=Homo sapiens OX=9606 GN=RPL35 PE=1 SV=2	cytosol [GO:0005829]; cytosolic large ribosomal subunit [GO:0022625]; membrane [GO:0016020]; nucleolus [GO:0005730]	323000	301000	342000	329000	488000	406000	487000	402000	11	10	0.461355	0.0295061	FALSE	23867.2	0.306737	0.497225	FALSE	non significant	0.376184
921	715	P50552	VASP	ENSG00000125753:VASP	Vasodilator-stimulated phosphoprotein OS=Homo sapiens OX=9606 GN=VASP PE=1 SV=3	actin cytoskeleton [GO:0015629]; bicellular tight junction [GO:0005923]; cytosol [GO:0005829]; extracellular exosome [GO:0070062]; filopodium membrane [GO:0031527]; focal adhesion [GO:0005925]; lamellipodium membrane [GO:0031258]; plasma membrane [GO:0005886]	70100	73900	85700	87900	123000	84300	91700	68800	6	6	0.211711	0.490588	FALSE	11390.3	-0.523418	0.00800943	FALSE	non significant	0.332886
4804	7410	Q86UK0	ABCA12	ENSG00000144452:ABCA12	ATP-binding cassette sub-family A member 12 OS=Homo sapiens OX=9606 GN=ABCA12 PE=1 SV=3	cytoplasm [GO:0005737]; cytosol [GO:0005829]; epidermal lamellar body [GO:0097209]; integral component of membrane [GO:0016021]; intracellular membrane-bounded organelle [GO:0043231]; plasma membrane [GO:0005886]	76100	53200	66900	62000	14200	18600	12600	18800	1	1	-2.00784	0.00375347	TRUE	200.687	1.0761	0.0547739	FALSE	significant by MS only	1.46991
246	943	O00194	RAB27B	ENSG00000041353:RAB27B	Ras-related protein Rab-27B OS=Homo sapiens OX=9606 GN=RAB27B PE=1 SV=4	Golgi apparatus [GO:0005794]; Golgi stack [GO:0005795]; anchored component of synaptic vesicle membrane [GO:0098993]; apical plasma membrane [GO:0016324]; axon cytoplasm [GO:1904115]; extracellular exosome [GO:0070062]; melanosome [GO:0042470]; multivesicular body membrane [GO:0032585]; plasma membrane [GO:0005886]; platelet dense granule membrane [GO:0031088]; secretory granule [GO:0030141]; tra…	35400	37500	31800	33200	96600	91100	54000	57000	8	3	1.11507	0.0514258	FALSE	3155.31	2.98646	2.90327e-07	TRUE	significant by RNA only	1.82486
599	811	P46779	RPL28	ENSG00000108107:RPL28	60S ribosomal protein L28 OS=Homo sapiens OX=9606 GN=RPL28 PE=1 SV=3	cell body [GO:0044297]; cytoplasmic ribonucleoprotein granule [GO:0036464]; cytosol [GO:0005829]; cytosolic large ribosomal subunit [GO:0022625]; dendrite [GO:0030425]; extracellular exosome [GO:0070062]; membrane [GO:0016020]	187000	185000	194000	187000	85100	65600	156000	131000	8	8	-0.782707	0.122279	FALSE	11578.2	0.938628	0.152999	FALSE	non significant	0.85713
637	1133	P63173	RPL38	ENSG00000172809:RPL38	60S ribosomal protein L38 OS=Homo sapiens OX=9606 GN=RPL38 PE=1 SV=2	cytosol [GO:0005829]; cytosolic large ribosomal subunit [GO:0022625]; eukaryotic 80S initiation complex [GO:0033291]; focal adhesion [GO:0005925]; polysomal ribosome [GO:0042788]; postsynaptic density [GO:0014069]	196000	181000	267000	280000	286000	227000	449000	303000	7	7	0.453173	0.241926	FALSE	16018.5	0.347363	0.408738	FALSE	non significant	0.396756
733	592	Q9P0K7	RAI14	ENSG00000039560:RAI14	Ankycorbin OS=Homo sapiens OX=9606 GN=RAI14 PE=1 SV=2	cell cortex [GO:0005938]; cell junction [GO:0030054]; cytoskeleton [GO:0005856]; cytosol [GO:0005829]; fibrillar center [GO:0001650]; nucleus [GO:0005634]	168000	175000	202000	211000	122000	111000	95100	93200	11	11	-0.843538	0.0101384	FALSE	13983.5	-1.36637	4.17454e-06	TRUE	significant by RNA only	1.07359
814	701	P50991	CCT4	ENSG00000115484:CCT4	T-complex protein 1 subunit delta OS=Homo sapiens OX=9606 GN=CCT4 PE=1 SV=4	cell body [GO:0044297]; cell projection [GO:0042995]; centrosome [GO:0005813]; chaperonin-containing T-complex [GO:0005832]; cytosol [GO:0005829]; extracellular exosome [GO:0070062]; melanosome [GO:0042470]; microtubule [GO:0005874]; nucleoplasm [GO:0005654]; zona pellucida receptor complex [GO:0002199]	69300	65600	69100	68800	98400	67900	72000	63100	8	8	0.143836	0.551914	FALSE	15775.6	-0.120702	0.686312	FALSE	non significant	0.131762
394	907	Q8TB61	SLC35B2	ENSG00000157593:SLC35B2	Adenosine 3'-phospho 5'-phosphosulfate transporter 1 OS=Homo sapiens OX=9606 GN=SLC35B2 PE=1 SV=1	Golgi apparatus [GO:0005794]; Golgi membrane [GO:0000139]; integral component of Golgi membrane [GO:0030173]; integral component of endoplasmic reticulum membrane [GO:0030176]; integral component of membrane [GO:0016021]; membrane [GO:0016020]	240000	283000	198000	207000	811000	735000	375000	414000	10	10	1.33123	0.0528032	FALSE	9875.07	0.0189625	0.940905	FALSE	non significant	0.158881
1007	730	O94979	SEC31A	ENSG00000138674:SEC31A	Protein transport protein Sec31A OS=Homo sapiens OX=9606 GN=SEC31A PE=1 SV=3	COPII vesicle coat [GO:0030127]; COPII-coated ER to Golgi transport vesicle [GO:0030134]; ER to Golgi transport vesicle membrane [GO:0012507]; Golgi membrane [GO:0000139]; cytoplasm [GO:0005737]; cytosol [GO:0005829]; endoplasmic reticulum [GO:0005783]; endoplasmic reticulum exit site [GO:0070971]; endoplasmic reticulum membrane [GO:0005789]; intracellular membrane-bounded organelle [GO:0043231];…	83200	67000	71300	81500	63900	77000	53400	63000	8	8	-0.235866	0.210242	FALSE	22383.9	0.208257	0.329247	FALSE	non significant	0.221632
575	813	Q99536	VAT1	ENSG00000108828:VAT1	Synaptic vesicle membrane protein VAT-1 homolog OS=Homo sapiens OX=9606 GN=VAT1 PE=1 SV=2	azurophil granule lumen [GO:0035578]; extracellular exosome [GO:0070062]; extracellular region [GO:0005576]; integral component of membrane [GO:0016021]; mitochondrial outer membrane [GO:0005741]	88400	110000	122000	118000	104000	108000	142000	129000	5	5	0.139775	0.493424	FALSE	16319.8	0.312684	0.124195	FALSE	non significant	0.209059
850	587	P48426	PIP4K2A	ENSG00000150867:PIP4K2A	Phosphatidylinositol 5-phosphate 4-kinase type-2 alpha OS=Homo sapiens OX=9606 GN=PIP4K2A PE=1 SV=2	autophagosome [GO:0005776]; cytosol [GO:0005829]; nucleoplasm [GO:0005654]; plasma membrane [GO:0005886]	86200	89200	78500	78600	53700	56600	39200	52500	8	7	-0.718999	0.0295899	FALSE	6032.37	0.181404	0.56876	FALSE	non significant	0.36115
1010	874	Q9UBV2	SEL1L	ENSG00000071537:SEL1L	Protein sel-1 homolog 1 OS=Homo sapiens OX=9606 GN=SEL1L PE=1 SV=3	Derlin-1 retrotranslocation complex [GO:0036513]; Hrd1p ubiquitin ligase ERAD-L complex [GO:0000839]; Hrd1p ubiquitin ligase complex [GO:0000836]; endoplasmic reticulum [GO:0005783]; endoplasmic reticulum membrane [GO:0005789]; endoplasmic reticulum quality control compartment [GO:0044322]; integral component of membrane [GO:0016021]	69600	85500	61500	78100	84300	53300	59200	66200	7	7	-0.164184	0.469517	FALSE	17810	-0.917191	3.7591e-05	FALSE	non significant	0.388057
614	543	Q9BQE5	APOL2	ENSG00000128335:APOL2	Apolipoprotein L2 OS=Homo sapiens OX=9606 GN=APOL2 PE=1 SV=1	endoplasmic reticulum membrane [GO:0005789]; extracellular region [GO:0005576]; membrane [GO:0016020]	197000	186000	187000	196000	205000	162000	146000	145000	10	10	-0.219257	0.231213	FALSE	4613.67	-1.10805	5.62778e-10	TRUE	significant by RNA only	0.492898
984	954	Q16799	RTN1	ENSG00000139970:RTN1	Reticulon-1 OS=Homo sapiens OX=9606 GN=RTN1 PE=1 SV=1	Golgi membrane [GO:0000139]; endoplasmic reticulum [GO:0005783]; endoplasmic reticulum membrane [GO:0005789]; integral component of endoplasmic reticulum membrane [GO:0030176]	24700	28700	24100	22000	17800	19300	12100	13600	6	6	-0.663932	0.0543702	FALSE	2832.47	-3.82175	0.00352049	TRUE	significant by RNA only	1.59292
267	1119	P20337	RAB3B	ENSG00000169213:RAB3B	Ras-related protein Rab-3B OS=Homo sapiens OX=9606 GN=RAB3B PE=1 SV=2	Golgi apparatus [GO:0005794]; anchored component of synaptic vesicle membrane [GO:0098993]; cytoplasm [GO:0005737]; cytosol [GO:0005829]; dopaminergic synapse [GO:0098691]; endosome [GO:0005768]; extracellular exosome [GO:0070062]; perinuclear region of cytoplasm [GO:0048471]; plasma membrane [GO:0005886]; secretory granule [GO:0030141]; synaptic vesicle [GO:0008021]; vesicle [GO:0031982]	5560	7810	5280	4190	4460	7680	11000	8680	6	1	0.478371	0.342832	FALSE	5170.51	-0.754249	0.0141907	FALSE	non significant	0.600676
378	942	Q9UL25	RAB21	ENSG00000080371:RAB21	Ras-related protein Rab-21 OS=Homo sapiens OX=9606 GN=RAB21 PE=1 SV=3	Golgi cisterna membrane [GO:0032580]; axon cytoplasm [GO:1904115]; cleavage furrow [GO:0032154]; cytoplasmic side of early endosome membrane [GO:0098559]; cytoplasmic side of plasma membrane [GO:0009898]; cytoplasmic vesicle membrane [GO:0030659]; cytosol [GO:0005829]; early endosome [GO:0005769]; early endosome membrane [GO:0031901]; endoplasmic reticulum membrane [GO:0005789]; endosome [GO:0005…	51800	66000	54100	52800	77200	83100	116000	109000	9	6	0.777982	0.0334808	FALSE	6398.03	-0.904989	0.000211708	FALSE	non significant	0.839086
582	632	Q10567	AP1B1	ENSG00000100280:AP1B1	AP-1 complex subunit beta-1 OS=Homo sapiens OX=9606 GN=AP1B1 PE=1 SV=2	Golgi apparatus [GO:0005794]; Golgi membrane [GO:0000139]; clathrin adaptor complex [GO:0030131]; clathrin-coated vesicle membrane [GO:0030665]; cytoplasmic vesicle membrane [GO:0030659]; cytosol [GO:0005829]; intracellular membrane-bounded organelle [GO:0043231]; lysosomal membrane [GO:0005765]; trans-Golgi network membrane [GO:0032588]	65300	80500	106000	85800	34300	33400	66000	60600	11	3	-0.797029	0.0964482	FALSE	9145.59	-0.217544	0.257664	FALSE	non significant	0.4164
647	1574	O15258	RER1	ENSG00000157916:RER1	Protein RER1 OS=Homo sapiens OX=9606 GN=RER1 PE=1 SV=1	Golgi apparatus [GO:0005794]; cell surface [GO:0009986]; endoplasmic reticulum [GO:0005783]; endoplasmic reticulum-Golgi intermediate compartment [GO:0005793]; integral component of Golgi membrane [GO:0030173]; plasma membrane [GO:0005886]	127000	140000	132000	135000	178000	168000	148000	141000	6	6	0.249917	0.105366	FALSE	12301.7	0.109334	0.595914	FALSE	non significant	0.165301
835	782	P78371	CCT2	ENSG00000166226:CCT2	T-complex protein 1 subunit beta OS=Homo sapiens OX=9606 GN=CCT2 PE=1 SV=4	azurophil granule lumen [GO:0035578]; cell body [GO:0044297]; chaperonin-containing T-complex [GO:0005832]; cytosol [GO:0005829]; extracellular exosome [GO:0070062]; extracellular region [GO:0005576]; microtubule [GO:0005874]; zona pellucida receptor complex [GO:0002199]	35100	38500	35000	33900	36700	38000	39300	38800	5	5	0.100683	0.154164	FALSE	23380.1	-0.164263	0.599617	FALSE	non significant	0.128602
704	700	O43854	EDIL3	ENSG00000164176:EDIL3	EGF-like repeat and discoidin I-like domain-containing protein 3 OS=Homo sapiens OX=9606 GN=EDIL3 PE=1 SV=1	collagen-containing extracellular matrix [GO:0062023]; extracellular exosome [GO:0070062]; extracellular vesicle [GO:1903561]	24400	35900	31400	33900	71300	90700	47700	43400	6	6	1.01087	0.066781	FALSE	38055.9	-1.20661	5.13701e-06	TRUE	significant by RNA only	1.10441
170	711	P17661	DES	ENSG00000175084:DES	Desmin OS=Homo sapiens OX=9606 GN=DES PE=1 SV=3	Z disc [GO:0030018]; cardiac myofibril [GO:0097512]; cytosol [GO:0005829]; extracellular exosome [GO:0070062]; fascia adherens [GO:0005916]; intercalated disc [GO:0014704]; intermediate filament [GO:0005882]; intermediate filament cytoskeleton [GO:0045111]; neuromuscular junction [GO:0031594]; nucleus [GO:0005634]; sarcolemma [GO:0042383]	4220	7790	5460	5110	8660	5280	5920	8420	11	3	0.324737	0.354077	FALSE	12.297	-2.19913	0.000232312	FALSE	non significant	0.845068
498	614	P13647	KRT5	ENSG00000186081:KRT5	Keratin type II cytoskeletal 5 OS=Homo sapiens OX=9606 GN=KRT5 PE=1 SV=3	cytoplasm [GO:0005737]; cytosol [GO:0005829]; extracellular exosome [GO:0070062]; intermediate filament [GO:0005882]; keratin filament [GO:0045095]; membrane [GO:0016020]; nucleus [GO:0005634]	50200	35000	21300	29400	22700	13600	12700	12400	9	1	-1.14623	0.0547141	FALSE	15.8086	-1.16385	0.0898697	FALSE	non significant	1.15501
574	703	P61254	RPL26	ENSG00000161970:RPL26	60S ribosomal protein L26 OS=Homo sapiens OX=9606 GN=RPL26 PE=1 SV=1	cytoplasm [GO:0005737]; cytosol [GO:0005829]; cytosolic large ribosomal subunit [GO:0022625]; cytosolic ribosome [GO:0022626]; extracellular exosome [GO:0070062]; membrane [GO:0016020]; nucleolus [GO:0005730]; nucleoplasm [GO:0005654]; ribonucleoprotein complex [GO:1990904]	247000	253000	274000	267000	367000	271000	275000	247000	10	10	0.156155	0.453086	FALSE	33223.2	0.40782	0.331781	FALSE	non significant	0.252355
837	753	Q6P4E1	CASC4	ENSG00000166734:CASC4	Protein CASC4 OS=Homo sapiens OX=9606 GN=CASC4 PE=1 SV=1	Golgi apparatus [GO:0005794]; integral component of membrane [GO:0016021]	36700	37500	36800	36200	119000	119000	49300	51900	9	9	1.20436	0.123483	FALSE	14182.4	-0.344701	0.0402547	FALSE	non significant	0.644316
844	641	Q9H7F0	ATP13A3	ENSG00000133657:ATP13A3	Probable cation-transporting ATPase 13A3 OS=Homo sapiens OX=9606 GN=ATP13A3 PE=1 SV=4	cell [GO:0005623]; integral component of membrane [GO:0016021]; membrane [GO:0016020]	80800	75600	84400	85700	69700	73800	67200	73100	7	7	-0.202208	0.0387889	FALSE	33299.1	-1.29507	1.98886e-06	TRUE	significant by RNA only	0.511737
888	866	P09619	PDGFRB	ENSG00000113721:PDGFRB	Platelet-derived growth factor receptor beta OS=Homo sapiens OX=9606 GN=PDGFRB PE=1 SV=1	Golgi apparatus [GO:0005794]; apical plasma membrane [GO:0016324]; cell surface [GO:0009986]; cytoplasm [GO:0005737]; cytoplasmic vesicle [GO:0031410]; focal adhesion [GO:0005925]; integral component of plasma membrane [GO:0005887]; intracellular membrane-bounded organelle [GO:0043231]; intrinsic component of plasma membrane [GO:0031226]; lysosomal lumen [GO:0043202]; membrane [GO:0016020]; nucle…	28900	31000	28800	28600	21400	23800	23200	24100	5	5	-0.342678	0.0106554	FALSE	14358.2	0.550902	0.550785	FALSE	non significant	0.43449
1045	859	Q8WVQ1	CANT1	ENSG00000171302:CANT1	Soluble calcium-activated nucleotidase 1 OS=Homo sapiens OX=9606 GN=CANT1 PE=1 SV=1	Golgi cisterna membrane [GO:0032580]; endoplasmic reticulum membrane [GO:0005789]; extracellular exosome [GO:0070062]; extracellular region [GO:0005576]; ficolin-1-rich granule lumen [GO:1904813]; integral component of membrane [GO:0016021]; membrane [GO:0016020]; plasma membrane [GO:0005886]; specific granule lumen [GO:0035580]; tertiary granule lumen [GO:1904724]	36600	32100	42500	57600	31400	33300	31900	38900	5	5	-0.317022	0.320187	FALSE	4116.59	0.124921	0.487257	FALSE	non significant	0.199004
1219	1000	Q15738	NSDHL	ENSG00000147383:NSDHL	Sterol-4-alpha-carboxylate 3-dehydrogenase decarboxylating OS=Homo sapiens OX=9606 GN=NSDHL PE=1 SV=2	endoplasmic reticulum [GO:0005783]; endoplasmic reticulum membrane [GO:0005789]; integral component of membrane [GO:0016021]; lipid droplet [GO:0005811]	60900	56500	71500	58900	28200	29900	50900	41800	5	5	-0.71654	0.0754194	FALSE	1739.85	-0.356056	0.0245124	FALSE	non significant	0.505102
734	644	P49840	GSK3A	ENSG00000105723:GSK3A	Glycogen synthase kinase-3 alpha OS=Homo sapiens OX=9606 GN=GSK3A PE=1 SV=2	apical dendrite [GO:0097440]; axon [GO:0030424]; beta-catenin destruction complex [GO:0030877]; cytosol [GO:0005829]; mitochondrion [GO:0005739]; neuronal cell body [GO:0043025]; nucleus [GO:0005634]; postsynapse [GO:0098794]; proximal dendrite [GO:1990635]	5180	8210	5140	8100	4820	4620	3050	3680	6	2	-0.719733	0.0798047	FALSE	1442.62	0.0449599	0.919072	FALSE	non significant	0.179886
757	604	Q8IWT6	LRRC8A	ENSG00000136802:LRRC8A	Volume-regulated anion channel subunit LRRC8A OS=Homo sapiens OX=9606 GN=LRRC8A PE=1 SV=1	cell surface [GO:0009986]; cytoplasm [GO:0005737]; integral component of plasma membrane [GO:0005887]; ion channel complex [GO:0034702]; membrane [GO:0016020]; plasma membrane [GO:0005886]	58900	72700	51300	51100	49400	59900	50500	55100	10	9	-0.122843	0.551375	FALSE	6875.27	-0.335312	0.188914	FALSE	non significant	0.202955
748	610	P04626	ERBB2	ENSG00000141736:ERBB2	Receptor tyrosine-protein kinase erbB-2 OS=Homo sapiens OX=9606 GN=ERBB2 PE=1 SV=1	apical plasma membrane [GO:0016324]; basal plasma membrane [GO:0009925]; basolateral plasma membrane [GO:0016323]; cytosol [GO:0005829]; endosome membrane [GO:0010008]; integral component of membrane [GO:0016021]; integral component of plasma membrane [GO:0005887]; myelin sheath [GO:0043209]; nucleus [GO:0005634]; perinuclear region of cytoplasm [GO:0048471]; plasma membrane [GO:0005886]; recepto…	79400	96500	72900	70100	62300	65900	63800	62100	7	6	-0.327708	0.114824	FALSE	7611.03	-0.345991	0.306819	FALSE	non significant	0.336725
797	777	P11940	PABPC1	ENSG00000070756:PABPC1	Polyadenylate-binding protein 1 OS=Homo sapiens OX=9606 GN=PABPC1 PE=1 SV=2	catalytic step 2 spliceosome [GO:0071013]; cytoplasm [GO:0005737]; cytoplasmic ribonucleoprotein granule [GO:0036464]; cytoplasmic stress granule [GO:0010494]; cytosol [GO:0005829]; extracellular exosome [GO:0070062]; focal adhesion [GO:0005925]; membrane [GO:0016020]; nucleus [GO:0005634]; ribonucleoprotein complex [GO:1990904]	65600	67400	70200	83200	210000	94800	94800	78800	10	6	0.740186	0.230668	FALSE	19605.8	0.0734493	0.878866	FALSE	non significant	0.233165
383	901	Q03113	GNA12	ENSG00000146535:GNA12	Guanine nucleotide-binding protein subunit alpha-12 OS=Homo sapiens OX=9606 GN=GNA12 PE=1 SV=4	brush border membrane [GO:0031526]; cytoplasm [GO:0005737]; focal adhesion [GO:0005925]; heterotrimeric G-protein complex [GO:0005834]; lateral plasma membrane [GO:0016328]; plasma membrane [GO:0005886]	3520	4760	2840	2490	232.296	783.027	1100	1070	7	1	-2.09516	0.0571098	FALSE	4210.16	-0.292877	0.199911	FALSE	non significant	0.783341
817	904	Q9Y6I3	EPN1	ENSG00000063245:EPN1	Epsin-1 OS=Homo sapiens OX=9606 GN=EPN1 PE=1 SV=2	clathrin-coated pit [GO:0005905]; cytosol [GO:0005829]; nucleus [GO:0005634]; plasma membrane [GO:0005886]	71600	79600	65800	74600	44200	62000	48800	47400	6	6	-0.526781	0.0371976	FALSE	5207.93	0.24199	0.56961	FALSE	non significant	0.357038
2426	2616	Q9GZU7	CTDSP1	ENSG00000144579:CTDSP1	Carboxy-terminal domain RNA polymerase II polypeptide A small phosphatase 1 OS=Homo sapiens OX=9606 GN=CTDSP1 PE=1 SV=1	extracellular exosome [GO:0070062]; nucleoplasm [GO:0005654]; nucleus [GO:0005634]	7670	9420	4310	5810	324.554	523.013	521.358	1500	1	1	-3.24555	0.0170651	TRUE	5885.63	0.61449	0.00857538	FALSE	significant by MS only	1.41222
712	766	Q9NX63	CHCHD3	ENSG00000106554:CHCHD3	MICOS complex subunit MIC19 OS=Homo sapiens OX=9606 GN=CHCHD3 PE=1 SV=1	MICOS complex [GO:0061617]; cytoplasm [GO:0005737]; extracellular exosome [GO:0070062]; mitochondrial inner membrane [GO:0005743]; mitochondrion [GO:0005739]; nucleus [GO:0005634]	102000	105000	129000	121000	120000	110000	123000	105000	7	7	0.00315343	0.962884	FALSE	4392.88	-0.408673	0.08303	FALSE	non significant	0.0358988
792	707	O95721	SNAP29	ENSG00000099940:SNAP29	Synaptosomal-associated protein 29 OS=Homo sapiens OX=9606 GN=SNAP29 PE=1 SV=1	Golgi membrane [GO:0000139]; SNARE complex [GO:0031201]; autophagosome [GO:0005776]; autophagosome membrane [GO:0000421]; azurophil granule membrane [GO:0035577]; centrosome [GO:0005813]; ciliary pocket membrane [GO:0020018]; cytoplasm [GO:0005737]; cytosol [GO:0005829]; nucleoplasm [GO:0005654]; plasma membrane [GO:0005886]; presynapse [GO:0098793]	81500	90200	82900	101000	121000	78000	109000	91800	7	7	0.169023	0.481977	FALSE	2207.24	-0.209034	0.478061	FALSE	non significant	0.187967
875	991	P14209	CD99	ENSG00000002586:CD99	CD99 antigen OS=Homo sapiens OX=9606 GN=CD99 PE=1 SV=1	cytoplasm [GO:0005737]; focal adhesion [GO:0005925]; integral component of plasma membrane [GO:0005887]; plasma membrane [GO:0005886]	34000	30100	24400	31300	52400	35200	27400	31300	5	5	0.288302	0.425491	FALSE	16356.4	-0.310367	0.449353	FALSE	non significant	0.299131
955	876	Q13557	CAMK2D	ENSG00000145349:CAMK2D	Calcium/calmodulin-dependent protein kinase type II subunit delta OS=Homo sapiens OX=9606 GN=CAMK2D PE=1 SV=3	cytoplasm [GO:0005737]; cytosol [GO:0005829]; endocytic vesicle membrane [GO:0030666]; membrane [GO:0016020]; neuron projection [GO:0043005]; nucleoplasm [GO:0005654]; nucleus [GO:0005634]; sarcolemma [GO:0042383]; sarcoplasmic reticulum membrane [GO:0033017]	42500	40400	46800	44200	31000	44000	33200	30700	5	5	-0.324211	0.133345	FALSE	10812.4	-0.474834	0.023289	FALSE	non significant	0.39236
799	750	Q8NB49	ATP11C	ENSG00000101974:ATP11C	Phospholipid-transporting ATPase IG OS=Homo sapiens OX=9606 GN=ATP11C PE=1 SV=3	endoplasmic reticulum [GO:0005783]; endoplasmic reticulum membrane [GO:0005789]; integral component of membrane [GO:0016021]; lysosomal membrane [GO:0005765]; plasma membrane [GO:0005886]; recycling endosome [GO:0055037]; trans-Golgi network [GO:0005802]	104000	103000	101000	92800	131000	138000	109000	109000	7	7	0.281039	0.106448	FALSE	7175.45	0.0173947	0.946235	FALSE	non significant	0.0699186
766	807	Q92520	FAM3C	ENSG00000196937:FAM3C	Protein FAM3C OS=Homo sapiens OX=9606 GN=FAM3C PE=1 SV=1	Golgi apparatus [GO:0005794]; extracellular exosome [GO:0070062]; extracellular region [GO:0005576]; platelet dense granule lumen [GO:0031089]	127000	124000	107000	128000	177000	177000	133000	147000	8	8	0.383527	0.0732462	FALSE	10349.9	-0.265069	0.319171	FALSE	non significant	0.318843
887	851	Q6YHK3	CD109	ENSG00000156535:CD109	CD109 antigen OS=Homo sapiens OX=9606 GN=CD109 PE=1 SV=2	anchored component of membrane [GO:0031225]; cell surface [GO:0009986]; extracellular region [GO:0005576]; extracellular space [GO:0005615]; plasma membrane [GO:0005886]; platelet alpha granule membrane [GO:0031092]	39000	42500	33000	35800	51900	59100	51000	51100	5	5	0.503686	0.0201758	FALSE	18720.6	1.26445	3.81149e-10	TRUE	significant by RNA only	0.79805
827	1174	P46776	RPL27A	ENSG00000166441:RPL27A	60S ribosomal protein L27a OS=Homo sapiens OX=9606 GN=RPL27A PE=1 SV=2	cytosol [GO:0005829]; cytosolic large ribosomal subunit [GO:0022625]; endoplasmic reticulum [GO:0005783]; membrane [GO:0016020]	154000	151000	135000	136000	83000	64300	84700	66900	5	5	-0.946406	0.0123606	FALSE	40112.5	0.475121	0.232484	FALSE	non significant	0.670565
513	1028	P62841	RPS15	ENSG00000115268:RPS15	40S ribosomal protein S15 OS=Homo sapiens OX=9606 GN=RPS15 PE=1 SV=2	cytosol [GO:0005829]; cytosolic small ribosomal subunit [GO:0022627]; focal adhesion [GO:0005925]; membrane [GO:0016020]; nucleoplasm [GO:0005654]; nucleus [GO:0005634]	191000	183000	247000	191000	445000	440000	340000	236000	6	6	0.847405	0.0697995	FALSE	14260.6	0.53114	0.353207	FALSE	non significant	0.670888
902	899	Q9BXP2	SLC12A9	ENSG00000146828:SLC12A9	Solute carrier family 12 member 9 OS=Homo sapiens OX=9606 GN=SLC12A9 PE=1 SV=1	extracellular exosome [GO:0070062]; integral component of membrane [GO:0016021]; plasma membrane [GO:0005886]	16800	19900	14700	15800	18500	26700	19900	26900	4	4	0.453173	0.105759	FALSE	3530.85	-0.142526	0.648264	FALSE	non significant	0.254144
710	621	Q8IXS6	PALM2	ENSG00000243444:PALM2	Paralemmin-2 OS=Homo sapiens OX=9606 GN=PALM2 PE=1 SV=3	plasma membrane [GO:0005886]	115000	128000	111000	111000	74500	88800	69300	92000	8	8	-0.518568	0.0341428	FALSE	2037.23	-0.551457	0.27696	FALSE	non significant	0.534759
5073	4990	O95342	ABCB11	ENSG00000073734:ABCB11	Bile salt export pump OS=Homo sapiens OX=9606 GN=ABCB11 PE=1 SV=2	apical part of cell [GO:0045177]; extracellular exosome [GO:0070062]; integral component of membrane [GO:0016021]; integral component of plasma membrane [GO:0005887]; intercellular canaliculus [GO:0046581]; membrane [GO:0016020]; plasma membrane [GO:0005886]	8920	10300	3590	6420	2230	2430	1670	1390	1	1	-1.92078	0.0314259	TRUE	21.7062	-0.999974	0.331033	FALSE	significant by MS only	1.3859
517	841	P02458	COL2A1	ENSG00000139219:COL2A1	Collagen alpha-1(II) chain OS=Homo sapiens OX=9606 GN=COL2A1 PE=1 SV=3	basement membrane [GO:0005604]; collagen trimer [GO:0005581]; collagen type II trimer [GO:0005585]; collagen-containing extracellular matrix [GO:0062023]; endoplasmic reticulum lumen [GO:0005788]; extracellular matrix [GO:0031012]; extracellular region [GO:0005576]; extracellular space [GO:0005615]	31700	31400	23000	28000	29400	29400	24600	23900	11	3	-0.0886487	0.654129	FALSE	110.758	-0.125086	0.945421	FALSE	non significant	0.105303
892	999	P06748	NPM1	ENSG00000181163:NPM1	Nucleophosmin OS=Homo sapiens OX=9606 GN=NPM1 PE=1 SV=2	centrosome [GO:0005813]; cytoplasm [GO:0005737]; cytosol [GO:0005829]; focal adhesion [GO:0005925]; membrane [GO:0016020]; nucleolus [GO:0005730]; nucleoplasm [GO:0005654]; nucleus [GO:0005634]; protein-DNA complex [GO:0032993]; protein-containing complex [GO:0032991]; ribonucleoprotein complex [GO:1990904]; spindle pole centrosome [GO:0031616]	37300	37500	38900	45200	25100	27400	33100	31900	5	5	-0.435458	0.0424052	FALSE	62551.9	-0.00531942	0.991498	FALSE	non significant	0.0481288
1116	1044	Q9BPW8	NIPSNAP1	ENSG00000184117:NIPSNAP1	Protein NipSnap homolog 1 OS=Homo sapiens OX=9606 GN=NIPSNAP1 PE=1 SV=1	mitochondrion [GO:0005739]; synaptic membrane [GO:0097060]	16300	16700	17100	16300	16600	22200	18700	15000	4	4	0.126798	0.531785	FALSE	4921.15	-0.528569	0.0275478	FALSE	non significant	0.258885
664	722	P83111	LACTB	ENSG00000103642:LACTB	Serine beta-lactamase-like protein LACTB mitochondrial OS=Homo sapiens OX=9606 GN=LACTB PE=1 SV=2	cytosol [GO:0005829]; mitochondrion [GO:0005739]	46900	50500	60500	54700	65100	55500	50700	51900	5	5	0.0701954	0.655666	FALSE	4193.95	-0.354455	0.317864	FALSE	non significant	0.157738
1064	932	P49757	NUMB	ENSG00000133961:NUMB	Protein numb homolog OS=Homo sapiens OX=9606 GN=NUMB PE=1 SV=2	apical part of cell [GO:0045177]; basolateral plasma membrane [GO:0016323]; clathrin-coated vesicle [GO:0030136]; cytoplasm [GO:0005737]; early endosome [GO:0005769]; extrinsic component of plasma membrane [GO:0019897]; focal adhesion [GO:0005925]; glutamatergic synapse [GO:0098978]; nucleus [GO:0005634]; plasma membrane [GO:0005886]	34800	33300	32200	35200	32500	36400	24600	23800	5	5	-0.20809	0.32653	FALSE	2781.55	-0.105315	0.72284	FALSE	non significant	0.148037
4991	3947	P55317	FOXA1	ENSG00000129514:FOXA1	Hepatocyte nuclear factor 3-alpha OS=Homo sapiens OX=9606 GN=FOXA1 PE=1 SV=2	fibrillar center [GO:0001650]; microvillus [GO:0005902]; nuclear chromatin [GO:0000790]; nucleoplasm [GO:0005654]; nucleus [GO:0005634]	1160	2090	2150	2890	541.386	311.221	858.077	859.942	1	1	-1.68925	0.0390244	TRUE	4.88765	-1.10602	0.382222	FALSE	significant by MS only	1.36687
594	1075	P53985	SLC16A1	ENSG00000155380:SLC16A1	Monocarboxylate transporter 1 OS=Homo sapiens OX=9606 GN=SLC16A1 PE=1 SV=3	cell junction [GO:0030054]; centrosome [GO:0005813]; extracellular exosome [GO:0070062]; integral component of membrane [GO:0016021]; integral component of plasma membrane [GO:0005887]; intracellular membrane-bounded organelle [GO:0043231]; membrane [GO:0016020]; plasma membrane [GO:0005886]; synapse [GO:0045202]	152000	140000	95600	97100	115000	133000	65700	70200	5	5	-0.336362	0.386234	FALSE	13368.3	-0.359998	0.296779	FALSE	non significant	0.347979
1157	931	Q16718	NDUFA5	ENSG00000128609:NDUFA5	NADH dehydrogenase [ubiquinone] 1 alpha subcomplex subunit 5 OS=Homo sapiens OX=9606 GN=NDUFA5 PE=1 SV=3	mitochondrial inner membrane [GO:0005743]; mitochondrial respiratory chain complex I [GO:0005747]	34800	46200	38000	36200	29800	49900	54100	52800	4	4	0.26582	0.457434	FALSE	3107.23	-0.522063	0.0184053	FALSE	non significant	0.372525
675	810	P42785	PRCP	ENSG00000137509:PRCP	Lysosomal Pro-X carboxypeptidase OS=Homo sapiens OX=9606 GN=PRCP PE=1 SV=1	azurophil granule membrane [GO:0035577]; basal part of cell [GO:0045178]; extracellular exosome [GO:0070062]; ficolin-1-rich granule membrane [GO:0101003]; plasma membrane [GO:0005886]	60200	63400	70300	64600	67000	135000	113000	106000	7	7	0.703656	0.114858	FALSE	7568.04	-0.0864375	0.812353	FALSE	non significant	0.246622
1205	856	O00291	HIP1	ENSG00000127946:HIP1	Huntingtin-interacting protein 1 OS=Homo sapiens OX=9606 GN=HIP1 PE=1 SV=5	Golgi apparatus [GO:0005794]; actin cortical patch [GO:0030479]; clathrin-coated vesicle [GO:0030136]; clathrin-coated vesicle membrane [GO:0030665]; cytoplasm [GO:0005737]; cytoskeleton [GO:0005856]; cytosol [GO:0005829]; extrinsic component of cytoplasmic side of plasma membrane [GO:0031234]; extrinsic component of postsynaptic membrane [GO:0098890]; extrinsic component of presynaptic membrane …	60600	55400	60000	66000	41800	44900	46200	45600	5	5	-0.439083	0.0122957	FALSE	1800.42	0.431332	0.0651264	FALSE	non significant	0.43519
904	1054	Q96GQ5	C16orf58	ENSG00000140688:C16orf58	RUS1 family protein C16orf58 OS=Homo sapiens OX=9606 GN=C16orf58 PE=1 SV=2	integral component of membrane [GO:0016021]; membrane [GO:0016020]	27600	33700	25800	29700	34400	33000	27200	29800	4	4	0.0909462	0.545938	FALSE	5593.94	0.0153815	0.969622	FALSE	non significant	0.0374017
676	838	P26572	MGAT1	ENSG00000131446:MGAT1	Alpha-1 3-mannosyl-glycoprotein 2-beta-N-acetylglucosaminyltransferase OS=Homo sapiens OX=9606 GN=MGAT1 PE=1 SV=2	Golgi apparatus [GO:0005794]; Golgi membrane [GO:0000139]; extracellular exosome [GO:0070062]; extracellular vesicle [GO:1903561]; integral component of membrane [GO:0016021]; membrane [GO:0016020]	80200	85800	54800	57900	148000	153000	78000	94200	8	8	0.763737	0.114389	FALSE	9060.72	-0.690925	2.2185e-05	FALSE	non significant	0.726419
1289	1229	Q03405	PLAUR	ENSG00000011422:PLAUR	Urokinase plasminogen activator surface receptor OS=Homo sapiens OX=9606 GN=PLAUR PE=1 SV=1	anchored component of membrane [GO:0031225]; cell surface [GO:0009986]; endoplasmic reticulum lumen [GO:0005788]; endoplasmic reticulum membrane [GO:0005789]; extracellular region [GO:0005576]; extrinsic component of membrane [GO:0019898]; focal adhesion [GO:0005925]; integral component of membrane [GO:0016021]; integral component of plasma membrane [GO:0005887]; invadopodium membrane [GO:0071438…	44800	34300	34400	32800	37200	37200	25300	25700	4	4	-0.222392	0.367211	FALSE	3329.26	0.612723	0.0581619	FALSE	non significant	0.369141
898	1027	Q6WKZ4	RAB11FIP1	ENSG00000156675:RAB11FIP1	Rab11 family-interacting protein 1 OS=Homo sapiens OX=9606 GN=RAB11FIP1 PE=1 SV=3	cytosol [GO:0005829]; intracellular membrane-bounded organelle [GO:0043231]; phagocytic vesicle membrane [GO:0030670]; recycling endosome [GO:0055037]	38800	39700	35400	36500	34000	42300	35600	27800	5	5	-0.106473	0.516472	FALSE	9505.7	-2.79401	9.94783e-09	TRUE	significant by RNA only	0.545422
953	733	P17987	TCP1	ENSG00000120438:TCP1	T-complex protein 1 subunit alpha OS=Homo sapiens OX=9606 GN=TCP1 PE=1 SV=1	Golgi apparatus [GO:0005794]; acrosomal vesicle [GO:0001669]; cell body [GO:0044297]; centrosome [GO:0005813]; chaperonin-containing T-complex [GO:0005832]; cytosol [GO:0005829]; extracellular exosome [GO:0070062]; microtubule [GO:0005874]; nuclear heterochromatin [GO:0005720]; pericentriolar material [GO:0000242]; zona pellucida receptor complex [GO:0002199]	34100	40700	33100	38400	37400	39900	35100	40100	7	7	0.0598795	0.585557	FALSE	21102.9	-0.139532	0.694307	FALSE	non significant	0.0914062
643	1327	P14406	COX7A2	ENSG00000112695:COX7A2	Cytochrome c oxidase subunit 7A2 mitochondrial OS=Homo sapiens OX=9606 GN=COX7A2 PE=1 SV=1	mitochondrial respirasome [GO:0005746]	132000	143000	193000	190000	130000	132000	150000	131000	5	5	-0.277135	0.259459	FALSE	8533.35	-0.509476	0.142278	FALSE	non significant	0.375758
382	759	P40429	RPL13A	ENSG00000142541:RPL13A	60S ribosomal protein L13a OS=Homo sapiens OX=9606 GN=RPL13A PE=1 SV=2	GAIT complex [GO:0097452]; cytoplasm [GO:0005737]; cytosol [GO:0005829]; cytosolic large ribosomal subunit [GO:0022625]; focal adhesion [GO:0005925]; large ribosomal subunit [GO:0015934]; membrane [GO:0016020]; nucleolus [GO:0005730]; nucleus [GO:0005634]; ribonucleoprotein complex [GO:1990904]; ribosome [GO:0005840]	339000	320000	390000	351000	232000	235000	345000	283000	10	10	-0.354496	0.134697	FALSE	91856.6	0.470322	0.240212	FALSE	non significant	0.408323
600	972	P08134	RHOC	ENSG00000155366:RHOC	Rho-related GTP-binding protein RhoC OS=Homo sapiens OX=9606 GN=RHOC PE=1 SV=1	cell cortex [GO:0005938]; cell division site [GO:0032153]; cleavage furrow [GO:0032154]; cytoplasm [GO:0005737]; cytosol [GO:0005829]; extracellular exosome [GO:0070062]; intracellular membrane-bounded organelle [GO:0043231]; nucleus [GO:0005634]; plasma membrane [GO:0005886]; stereocilium [GO:0032420]	2340	1910	2310	2350	1230	722.596	1560	2300	7	1	-0.616243	0.215136	FALSE	26734.2	-0.119615	0.756513	FALSE	non significant	0.271499
924	939	P07737	PFN1	ENSG00000108518:PFN1	Profilin-1 OS=Homo sapiens OX=9606 GN=PFN1 PE=1 SV=2	blood microparticle [GO:0072562]; cell cortex [GO:0005938]; cytoplasm [GO:0005737]; cytoskeleton [GO:0005856]; cytosol [GO:0005829]; extracellular exosome [GO:0070062]; focal adhesion [GO:0005925]; glutamatergic synapse [GO:0098978]; membrane [GO:0016020]; nucleus [GO:0005634]	67500	72700	122000	151000	64100	53800	85500	87200	5	5	-0.507806	0.333146	FALSE	46084.7	-0.105735	0.836332	FALSE	non significant	0.231717
572	940	P61586	RHOA	ENSG00000067560:RHOA	Transforming protein RhoA OS=Homo sapiens OX=9606 GN=RHOA PE=1 SV=1	apical junction complex [GO:0043296]; axon [GO:0030424]; cell cortex [GO:0005938]; cell division site [GO:0032153]; cell junction [GO:0030054]; cell periphery [GO:0071944]; cleavage furrow [GO:0032154]; cytoplasm [GO:0005737]; cytoskeleton [GO:0005856]; cytosol [GO:0005829]; dendritic spine [GO:0043197]; endoplasmic reticulum membrane [GO:0005789]; endosome [GO:0005768]; extracellular exosome [GO…	9660	7700	8490	7940	5700	4620	5880	4810	7	1	-0.68552	0.0134465	FALSE	32901.8	-0.583468	0.00250531	FALSE	non significant	0.632439
353	832	P51151	RAB9A	ENSG00000123595:RAB9A	Ras-related protein Rab-9A OS=Homo sapiens OX=9606 GN=RAB9A PE=1 SV=1	cytosol [GO:0005829]; endoplasmic reticulum membrane [GO:0005789]; extracellular exosome [GO:0070062]; late endosome [GO:0005770]; lysosome [GO:0005764]; melanosome [GO:0042470]; phagocytic vesicle [GO:0045335]; phagocytic vesicle membrane [GO:0030670]; plasma membrane [GO:0005886]; trans-Golgi network membrane [GO:0032588]; transport vesicle [GO:0030133]	40700	39500	33800	38000	71100	79700	56700	58700	8	4	0.808439	0.0199037	FALSE	1514.24	-0.599076	0.019641	FALSE	non significant	0.695929
709	611	P48449	LSS	ENSG00000160285:LSS	Lanosterol synthase OS=Homo sapiens OX=9606 GN=LSS PE=1 SV=1	endoplasmic reticulum membrane [GO:0005789]; lipid droplet [GO:0005811]; membrane [GO:0016020]	107000	117000	118000	118000	112000	85200	101000	93000	9	9	-0.233727	0.125539	FALSE	13476.7	-0.163788	0.70011	FALSE	non significant	0.195657
853	1303	Q99584	S100A13	ENSG00000189171:S100A13	Protein S100-A13 OS=Homo sapiens OX=9606 GN=S100A13 PE=1 SV=1	cytoplasm [GO:0005737]; cytosol [GO:0005829]; extracellular region [GO:0005576]; extracellular space [GO:0005615]; mast cell granule [GO:0042629]; nucleolus [GO:0005730]; nucleus [GO:0005634]; perinuclear region of cytoplasm [GO:0048471]; plasma membrane [GO:0005886]	66200	56300	65800	68500	67600	60200	168000	191000	5	5	0.922684	0.286625	FALSE	3852.62	0.603251	0.184409	FALSE	non significant	0.746063
765	975	Q96EY7	PTCD3	ENSG00000132300:PTCD3	Pentatricopeptide repeat domain-containing protein 3 mitochondrial OS=Homo sapiens OX=9606 GN=PTCD3 PE=1 SV=3	cytosol [GO:0005829]; mitochondrial inner membrane [GO:0005743]; mitochondrion [GO:0005739]; nucleoplasm [GO:0005654]; plasma membrane [GO:0005886]; ribosome [GO:0005840]	45500	42600	57300	44200	64000	72500	66800	54100	5	5	0.441053	0.0542301	FALSE	6652.16	-0.175051	0.398064	FALSE	non significant	0.277861
1067	1122	P52815	MRPL12	ENSG00000262814:MRPL12	39S ribosomal protein L12 mitochondrial OS=Homo sapiens OX=9606 GN=MRPL12 PE=1 SV=2	mitochondrial inner membrane [GO:0005743]; mitochondrial large ribosomal subunit [GO:0005762]; mitochondrion [GO:0005739]	27900	36500	51400	44300	34600	38600	47200	44400	5	5	0.0417429	0.830128	FALSE	1939.72	-0.167337	0.777454	FALSE	non significant	0.0835771
781	1097	Q96RQ1	ERGIC2	ENSG00000087502:ERGIC2	Endoplasmic reticulum-Golgi intermediate compartment protein 2 OS=Homo sapiens OX=9606 GN=ERGIC2 PE=1 SV=2	COPII-coated ER to Golgi transport vesicle [GO:0030134]; cytoplasm [GO:0005737]; endoplasmic reticulum [GO:0005783]; endoplasmic reticulum-Golgi intermediate compartment membrane [GO:0033116]; integral component of Golgi membrane [GO:0030173]; integral component of endoplasmic reticulum membrane [GO:0030176]; intracellular membrane-bounded organelle [GO:0043231]; membrane [GO:0016020]; nucleolus …	54000	57500	50200	45700	161000	178000	74300	72300	4	4	1.22735	0.109121	FALSE	5500.75	-0.26364	0.0943626	FALSE	non significant	0.568841
905	1060	Q9P0V9	2019-09-10	ENSG00000186522:SEPT10	Septin-10 OS=Homo sapiens OX=9606 GN=SEPT10 PE=1 SV=2	microtubule cytoskeleton [GO:0015630]; septin complex [GO:0031105]; septin ring [GO:0005940]	9870	8750	10300	8460	9330	13100	18300	8940	4	2	0.410108	0.34664	FALSE	8054.62	-0.550065	0.00273052	FALSE	non significant	0.474959
581	1559	P63220	RPS21	ENSG00000171858:RPS21	40S ribosomal protein S21 OS=Homo sapiens OX=9606 GN=RPS21 PE=1 SV=1	cytosol [GO:0005829]; cytosolic small ribosomal subunit [GO:0022627]; nucleoplasm [GO:0005654]; polysomal ribosome [GO:0042788]; rough endoplasmic reticulum [GO:0005791]; small ribosomal subunit [GO:0015935]; synapse [GO:0045202]	130000	137000	113000	123000	468000	261000	189000	190000	7	7	1.13933	0.0983239	FALSE	13825	0.460032	0.334589	FALSE	non significant	0.723966
354	1114	P14649	MYL6B	ENSG00000196465:MYL6B	Myosin light chain 6B OS=Homo sapiens OX=9606 GN=MYL6B PE=1 SV=1	cytosol [GO:0005829]; extracellular exosome [GO:0070062]; muscle myosin complex [GO:0005859]; myosin complex [GO:0016459]; unconventional myosin complex [GO:0016461]	3710	2760	2690	3200	1840	2150	2940	2500	6	1	-0.390349	0.147321	FALSE	28063.4	-1.07597	8.61024e-05	TRUE	significant by RNA only	0.648077
923	787	P48059	LIMS1	ENSG00000169756:LIMS1	LIM and senescent cell antigen-like-containing domain protein 1 OS=Homo sapiens OX=9606 GN=LIMS1 PE=1 SV=4	cell-cell junction [GO:0005911]; cytoplasm [GO:0005737]; cytosol [GO:0005829]; focal adhesion [GO:0005925]; perinuclear region of cytoplasm [GO:0048471]; plasma membrane [GO:0005886]; protein-containing complex [GO:0032991]	64600	72000	87100	84200	38000	44400	52600	53000	5	5	-0.711729	0.0238544	FALSE	6902.01	-0.328942	0.372725	FALSE	non significant	0.483857
759	672	Q13740	ALCAM	ENSG00000170017:ALCAM	CD166 antigen OS=Homo sapiens OX=9606 GN=ALCAM PE=1 SV=2	axon [GO:0030424]; dendrite [GO:0030425]; external side of plasma membrane [GO:0009897]; extracellular exosome [GO:0070062]; focal adhesion [GO:0005925]; immunological synapse [GO:0001772]; integral component of plasma membrane [GO:0005887]; intrinsic component of plasma membrane [GO:0031226]; neuronal cell body [GO:0043025]	145000	122000	101000	112000	152000	186000	110000	122000	9	9	0.247928	0.411832	FALSE	32103.8	-0.954473	0.0351868	FALSE	non significant	0.486457
775	812	P36542	ATP5C1	ENSG00000165629:ATP5C1	ATP synthase subunit gamma mitochondrial OS=Homo sapiens OX=9606 GN=ATP5F1C PE=1 SV=1	membrane [GO:0016020]; mitochondrial inner membrane [GO:0005743]; mitochondrial matrix [GO:0005759]; mitochondrial proton-transporting ATP synthase complex [GO:0005753]; mitochondrial proton-transporting ATP synthase complex, catalytic core F(1) [GO:0000275]; mitochondrion [GO:0005739]	66300	94200	99200	121000	50000	55000	63100	53400	7	7	-0.781348	0.0598474	FALSE	8458.41	-0.577263	0.00737995	FALSE	non significant	0.671597
[truncated: 1,834 more rows]
