# Supplementary material for: H3.3 G34W Promotes Growth and Impedes Differentiation of Osteoblast-Like Mesenchymal Progenitors in Giant Cell Tumor of Bone
Source: Oxford University Press journal article supplement (doi:10.1158/2159-8290.cd-20-0461), 2020-09-23
Supplement: 21598290cd200461-sup-241016_2_supp_6571118_qgmhq8.xlsx [file 21598290cd200461-sup-241016_2_supp_6571118_qgmhq8.xlsx]

## Sheet: CCINX_Nodes
Table S6. Interactions between the stromal and myeloid compartments.
node	gene	cellType	proteinType	nodeWeight	DetectRate	MeanDetectGeneExpr	MeanNormGeneExpr
AGRN_Stromal	AGRN	Stromal	ECM/Receptor/Ligand	0.0801206	0.149965	-0.470232	-3.20717
SDF4_Stromal	SDF4	Stromal	Ligand	0.227759	0.365618	-0.295033	-1.74652
AGTRAP_Stromal	AGTRAP	Stromal	Receptor	0.0512522	0.130864	-0.559372	-3.49278
EPHA2_Stromal	EPHA2	Stromal	Receptor	0.0783714	0.148288	-0.471318	-3.22448
MFAP2_Stromal	MFAP2	Stromal	ECM/Ligand	0.0439916	0.103517	-0.293045	-3.56461
HSPG2_Stromal	HSPG2	Stromal	ECM/Receptor/Ligand	0.0871407	0.153506	-0.434427	-3.13772
C1QA_Stromal	C1QA	Stromal	Ligand	0.0288676	0.0921034	-0.274186	-3.71424
COL16A1_Stromal	COL16A1	Stromal	ECM/Ligand	0.335775	0.536641	0.220058	-0.677879
TXLNA_Stromal	TXLNA	Stromal	Ligand	0.00124566	0.0932681	-0.565704	-3.98752
COL8A2_Stromal	COL8A2	Stromal	ECM/Ligand	0.11575	0.1727	-0.321286	-2.85467
BMP8B_Stromal	BMP8B	Stromal	Ligand	0.0738377	0.13925	-0.425463	-3.26933
PPT1_Stromal	PPT1	Stromal	ECM/Ligand	0.084258	0.158211	-0.50651	-3.16624
LEPRE1_Stromal	LEPRE1	Stromal	Ligand	0.159501	0.250221	-0.423288	-2.42183
PTPRF_Stromal	PTPRF	Stromal	Receptor	0.00797717	0.0959236	-0.539577	-3.92092
GPX7_Stromal	GPX7	Stromal	Ligand	0.13956	0.227533	-0.483479	-2.61911
TM2D1_Stromal	TM2D1	Stromal	Receptor	0.0840813	0.160214	-0.526411	-3.16799
CYR61_Stromal	CYR61	Stromal	ECM/Ligand	0.341947	0.29802	1.12965	-0.616817
VCAM1_Stromal	VCAM1	Stromal	Ligand	0.226376	0.297275	-0.0101872	-1.76021
EXTL2_Stromal	EXTL2	Stromal	Ligand	0.0899841	0.166224	-0.521122	-3.10959
COL11A1_Stromal	COL11A1	Stromal	ECM/Ligand	0.246146	0.222409	0.603992	-1.56462
CSF1_Stromal	CSF1	Stromal	Receptor/Ligand	0.255051	0.391987	-0.12547	-1.47652
OLFML3_Stromal	OLFML3	Stromal	Ligand	0.40709	0.659306	0.628632	0.0276675
CD58_Stromal	CD58	Stromal	Receptor	0.0409117	0.119963	-0.53623	-3.59508
NOTCH2_Stromal	NOTCH2	Stromal	Receptor	0.161596	0.245935	-0.377637	-2.4011
ITGA10_Stromal	ITGA10	Stromal	Receptor	0.327615	0.554717	0.0915338	-0.758608
ECM1_Stromal	ECM1	Stromal	ECM/Ligand	0.00551582	0.094526	-0.542765	-3.94527
S100A8_Stromal	S100A8	Stromal	Ligand	0.0528301	0.0677382	0.406241	-3.47717
S100A4_Stromal	S100A4	Stromal	Ligand	0.630401	0.989891	2.25164	2.23698
S100A13_Stromal	S100A13	Stromal	Ligand	0.362157	0.617936	0.277576	-0.416871
SLC39A1_Stromal	SLC39A1	Stromal	Receptor	0.194135	0.302073	-0.352292	-2.07919
THBS3_Stromal	THBS3	Stromal	ECM/Ligand	0.0463353	0.123084	-0.519611	-3.54143
BGLAP_Stromal	BGLAP	Stromal	Ligand	0.344241	0.456324	0.537714	-0.594117
APOA1BP_Stromal	APOA1BP	Stromal	Ligand	0.113165	0.190822	-0.490827	-2.88025
HDGF_Stromal	HDGF	Stromal	Ligand	0.138619	0.217284	-0.426302	-2.62843
FCER1G_Stromal	FCER1G	Stromal	Receptor	0.371578	0.545959	0.54945	-0.323661
DDR2_Stromal	DDR2	Stromal	Receptor	0.14113	0.219893	-0.41867	-2.60358
DPT_Stromal	DPT	Stromal	ECM/Ligand	0.148287	0.17461	-0.015204	-2.53278
LAMC1_Stromal	LAMC1	Stromal	ECM/Ligand	0.0924952	0.163708	-0.474272	-3.08475
TPR_Stromal	TPR	Stromal	Receptor	0.209473	0.324202	-0.30252	-1.92744
CFH_Stromal	CFH	Stromal	Ligand	0.275418	0.447939	-0.116448	-1.27501
RNPEP_Stromal	RNPEP	Stromal	Ligand	0.0295259	0.111577	-0.544373	-3.70773
ADIPOR1_Stromal	ADIPOR1	Stromal	Receptor	0.011221	0.100116	-0.569189	-3.88883
FMOD_Stromal	FMOD	Stromal	ECM/Ligand	0.0134034	0.100303	-0.550272	-3.86724
CD55_Stromal	CD55	Stromal	Receptor	0.150679	0.208386	-0.24665	-2.50912
NENF_Stromal	NENF	Stromal	Ligand	0.301734	0.509294	-0.0412792	-1.01466
TGFB2_Stromal	TGFB2	Stromal	ECM/Ligand	0.1656	0.228139	-0.229655	-2.36149
NID1_Stromal	NID1	Stromal	ECM/Ligand	0.065888	0.136455	-0.47488	-3.34798
ADAM17_Stromal	ADAM17	Stromal	ECM/Ligand	0.0480681	0.121826	-0.487643	-3.52428
HPCAL1_Stromal	HPCAL1	Stromal	ECM/Ligand	0.107901	0.180853	-0.465505	-2.93233
EMILIN1_Stromal	EMILIN1	Stromal	ECM/Ligand	0.326922	0.552248	0.0911105	-0.765467
LTBP1_Stromal	LTBP1	Stromal	ECM/Receptor/Ligand	0.151607	0.221058	-0.322628	-2.49993
ANTXR1_Stromal	ANTXR1	Stromal	Receptor	0.243555	0.379036	-0.190742	-1.59025
PRADC1_Stromal	PRADC1	Stromal	Ligand	0.00898358	0.101421	-0.610009	-3.91096
IL1R1_Stromal	IL1R1	Stromal	Receptor	0.133082	0.210203	-0.433293	-2.68321
FBLN7_Stromal	FBLN7	Stromal	ECM/Ligand	0.125998	0.199534	-0.42824	-2.75329
SLC20A1_Stromal	SLC20A1	Stromal	Receptor	0.127771	0.187188	-0.318563	-2.73575
TNFAIP6_Stromal	TNFAIP6	Stromal	Ligand	0.0753881	0.131843	-0.331263	-3.25399
ACVR1_Stromal	ACVR1	Stromal	Receptor	0.0168709	0.105334	-0.586561	-3.83293
PLA2R1_Stromal	PLA2R1	Stromal	Receptor	0.00971719	0.097461	-0.545292	-3.9037
FAP_Stromal	FAP	Stromal	ECM/Ligand	0.198957	0.30813	-0.333213	-2.03147
NCKAP1_Stromal	NCKAP1	Stromal	Receptor	0.0749731	0.152155	-0.542083	-3.2581
ITGAV_Stromal	ITGAV	Stromal	ECM/Receptor/Ligand	0.168418	0.255299	-0.364045	-2.33361
TFPI_Stromal	TFPI	Stromal	Ligand	0.172072	0.248078	-0.286502	-2.29747
COL3A1_Stromal	COL3A1	Stromal	ECM/Ligand	0.696478	0.99222	2.90198	2.89071
COL5A2_Stromal	COL5A2	Stromal	ECM/Ligand	0.476756	0.890333	0.884486	0.716907
SLC40A1_Stromal	SLC40A1	Stromal	Receptor	0.225644	0.307757	-0.0674216	-1.76745
FZD7_Stromal	FZD7	Stromal	Receptor	0.11767	0.186629	-0.414196	-2.83568
BMPR2_Stromal	BMPR2	Stromal	Receptor	0.0655637	0.141486	-0.530326	-3.35119
FZD5_Stromal	FZD5	Stromal	Receptor	0.054334	0.12574	-0.471244	-3.46229
FN1_Stromal	FN1	Stromal	ECM/Ligand	0.678012	0.996506	2.71307	2.70802
SERPINE2_Stromal	SERPINE2	Stromal	ECM/Ligand	0.418937	0.652318	0.761212	0.144873
COL6A3_Stromal	COL6A3	Stromal	ECM/Ligand	0.44913	0.782064	0.798221	0.443587
GPC1_Stromal	GPC1	Stromal	ECM/Ligand	0.195258	0.280922	-0.236455	-2.06807
LMCD1_Stromal	LMCD1	Stromal	ECM/Ligand	0.0653235	0.131563	-0.427801	-3.35357
TIMP4_Stromal	TIMP4	Stromal	ECM/Ligand	0.0818593	0.139669	-0.350419	-3.18997
TGFBR2_Stromal	TGFBR2	Stromal	Receptor	0.200756	0.302166	-0.28722	-2.01368
CMTM6_Stromal	CMTM6	Stromal	Ligand	0.0922865	0.165153	-0.489009	-3.08681
CRTAP_Stromal	CRTAP	Stromal	ECM/Ligand	0.147542	0.235034	-0.451288	-2.54014
RPSA_Stromal	RPSA	Stromal	Receptor	0.388205	0.750151	0.255563	-0.159171
PTH1R_Stromal	PTH1R	Stromal	Receptor	0.359801	0.549499	0.423608	-0.440175
LAMB2_Stromal	LAMB2	Stromal	ECM/Ligand	0.257115	0.394037	-0.112578	-1.4561
MANF_Stromal	MANF	Stromal	Ligand	0.173584	0.258887	-0.333056	-2.2825
NISCH_Stromal	NISCH	Stromal	Receptor	0.057912	0.128954	-0.472252	-3.42689
PTPRG_Stromal	PTPRG	Stromal	Receptor	0.11644	0.191568	-0.464047	-2.84785
COL8A1_Stromal	COL8A1	Stromal	ECM/Ligand	0.130303	0.154764	-0.0190916	-2.7107
CD47_Stromal	CD47	Stromal	Receptor	0.125871	0.204519	-0.465099	-2.75455
CD200_Stromal	CD200	Stromal	Receptor	0.0469654	0.117727	-0.449173	-3.53519
CCDC80_Stromal	CCDC80	Stromal	ECM/Ligand	0.435631	0.797298	0.636839	0.310038
FSTL1_Stromal	FSTL1	Stromal	Ligand	0.302152	0.482553	0.0406648	-1.01053
ITGB5_Stromal	ITGB5	Stromal	Receptor	0.302608	0.49993	-0.00585415	-1.00601
PLXNA1_Stromal	PLXNA1	Stromal	Receptor	0.0213008	0.103471	-0.516966	-3.7891
RYK_Stromal	RYK	Stromal	Receptor	0.162096	0.247706	-0.383042	-2.39616
PLSCR1_Stromal	PLSCR1	Stromal	ECM/Ligand	0.00789767	0.0968088	-0.553615	-3.92171
SERPINI1_Stromal	SERPINI1	Stromal	ECM/Ligand	0.032339	0.0899604	-0.205866	-3.6799
TNFSF10_Stromal	TNFSF10	Stromal	Ligand	0.26163	0.364034	0.0463462	-1.41143
APOD_Stromal	APOD	Stromal	Ligand	0.0695313	0.0941999	0.0957803	-3.31194
DLG1_Stromal	DLG1	Stromal	ECM/Ligand	0.0253788	0.106732	-0.521371	-3.74876
C4orf48_Stromal	C4orf48	Stromal	Ligand	0.294848	0.489401	-0.0519222	-1.08278
LRPAP1_Stromal	LRPAP1	Stromal	Receptor	0.248876	0.404752	-0.2328	-1.53761
C1QTNF7_Stromal	C1QTNF7	Stromal	Ligand	0.0547325	0.111158	-0.289477	-3.45835
SLIT2_Stromal	SLIT2	Stromal	Ligand	0.120851	0.186629	-0.382717	-2.80421
LGI2_Stromal	LGI2	Stromal	Ligand	0.000417638	0.0872117	-0.477043	-3.99571
PDGFRA_Stromal	PDGFRA	Stromal	Receptor	0.168116	0.250547	-0.339925	-2.3366
IGFBP7_Stromal	IGFBP7	Stromal	ECM/Ligand	0.379524	0.516282	0.708693	-0.245049
ANTXR2_Stromal	ANTXR2	Stromal	Receptor	0.0204883	0.105334	-0.550759	-3.79714
IBSP_Stromal	IBSP	Stromal	Ligand	0.675639	0.941626	2.77131	2.68454
SPP1_Stromal	SPP1	Stromal	ECM/Ligand	0.635852	0.818635	2.57961	2.2909
PKD2_Stromal	PKD2	Stromal	Receptor	0.0393182	0.118053	-0.528846	-3.61085
AIMP1_Stromal	AIMP1	Stromal	Ligand	0.131359	0.211041	-0.45608	-2.70025
PLA2G12A_Stromal	PLA2G12A	Stromal	Ligand	0.0242356	0.108875	-0.561365	-3.76007
CFI_Stromal	CFI	Stromal	Receptor	0.258502	0.404705	-0.137387	-1.44237
ANXA5_Stromal	ANXA5	Stromal	Ligand	0.372838	0.669322	0.268007	-0.311201
PGRMC2_Stromal	PGRMC2	Stromal	Receptor	0.0458183	0.126159	-0.560322	-3.54654
PDGFC_Stromal	PDGFC	Stromal	Ligand	0.0988233	0.171023	-0.474708	-3.02214
HMGB2_Stromal	HMGB2	Stromal	Ligand	0.0130962	0.0948521	-0.472705	-3.87027
SEMA5A_Stromal	SEMA5A	Stromal	Receptor	0.0495301	0.12341	-0.49181	-3.50982
LIFR_Stromal	LIFR	Stromal	Receptor	0.0809785	0.146611	-0.429109	-3.19869
OSMR_Stromal	OSMR	Stromal	Receptor	0.0703497	0.142837	-0.496673	-3.30384
FST_Stromal	FST	Stromal	Ligand	0.0970148	0.158863	-0.386208	-3.04003
IL6ST_Stromal	IL6ST	Stromal	Receptor	0.0890505	0.162637	-0.498886	-3.11883
ERBB2IP_Stromal	ERBB2IP	Stromal	ECM/Ligand	0.036878	0.114559	-0.509654	-3.63499
VCAN_Stromal	VCAN	Stromal	ECM/Ligand	0.279585	0.388307	0.130881	-1.23379
HAPLN1_Stromal	HAPLN1	Stromal	ECM/Ligand	0.110519	0.12942	0.0431337	-2.90643
EDIL3_Stromal	EDIL3	Stromal	Ligand	0.175883	0.250082	-0.260397	-2.25976
LOX_Stromal	LOX	Stromal	ECM/Ligand	0.0220233	0.0993711	-0.451492	-3.78195
SNX2_Stromal	SNX2	Stromal	Ligand	0.0709545	0.147403	-0.536078	-3.29786
CXCL14_Stromal	CXCL14	Stromal	Ligand	0.360918	0.194456	1.93331	-0.429124
TGFBI_Stromal	TGFBI	Stromal	ECM/Ligand	0.369082	0.534312	0.555862	-0.348357
SPOCK1_Stromal	SPOCK1	Stromal	ECM/Ligand	0.19089	0.285535	-0.303164	-2.11128
SIL1_Stromal	SIL1	Stromal	Ligand	0.113407	0.190123	-0.483142	-2.87786
NR3C1_Stromal	NR3C1	Stromal	Receptor	0.154573	0.236758	-0.392259	-2.47058
PDGFRB_Stromal	PDGFRB	Stromal	Receptor	0.199622	0.287584	-0.227085	-2.02489
CD74_Stromal	CD74	Stromal	Receptor	0.484077	0.847752	1.02761	0.789333
SPARC_Stromal	SPARC	Stromal	ECM/Ligand	0.680808	0.998696	2.73756	2.73568
SLIT3_Stromal	SLIT3	Stromal	Ligand	0.0711085	0.140135	-0.461613	-3.29633
HRH2_Stromal	HRH2	Stromal	Receptor	0.104368	0.166969	-0.385238	-2.96728
ADAMTS2_Stromal	ADAMTS2	Stromal	ECM/Ligand	0.115527	0.183415	-0.410334	-2.85688
HLA-F_Stromal	HLA-F	Stromal	Receptor	0.0311592	0.112975	-0.546166	-3.69157
HLA-A_Stromal	HLA-A	Stromal	Receptor	0.526363	0.977638	1.24031	1.20769
HLA-E_Stromal	HLA-E	Stromal	Receptor	0.223913	0.337014	-0.215561	-1.78458
HLA-C_Stromal	HLA-C	Stromal	Receptor	0.480949	0.943117	0.842878	0.758388
HLA-B_Stromal	HLA-B	Stromal	Receptor	0.504752	0.953785	1.06214	0.993877
C2_Stromal	C2	Stromal	Ligand	0.13256	0.198835	-0.358248	-2.68837
HLA-DRA_Stromal	HLA-DRA	Stromal	Receptor	0.337719	0.548102	0.208805	-0.658647
HLA-DRB1_Stromal	HLA-DRB1	Stromal	Receptor	0.40824	0.746145	0.461506	0.0390448
HLA-DQB1_Stromal	HLA-DQB1	Stromal	Receptor	0.10921	0.163615	-0.308045	-2.91938
HLA-DPA1_Stromal	HLA-DPA1	Stromal	Receptor	0.182354	0.251013	-0.201733	-2.19574
C6orf1_Stromal	C6orf1	Stromal	Ligand	0.0635432	0.140694	-0.542223	-3.37118
PTK7_Stromal	PTK7	Stromal	Receptor	0.0624501	0.136967	-0.51431	-3.382
LRRC1_Stromal	LRRC1	Stromal	Ligand	0.103179	0.167901	-0.40503	-2.97904
DST_Stromal	DST	Stromal	ECM/Ligand	0.262152	0.414163	-0.134601	-1.40626
COL12A1_Stromal	COL12A1	Stromal	ECM/Ligand	0.053979	0.0578616	0.644967	-3.4658
WISP3_Stromal	WISP3	Stromal	ECM/Ligand	0.0944973	0.168647	-0.497334	-3.06494
LAMA4_Stromal	LAMA4	Stromal	ECM/Ligand	0.241335	0.375402	-0.198812	-1.61222
COL10A1_Stromal	COL10A1	Stromal	ECM/Ligand	0.271328	0.297647	0.43276	-1.31548
ENPP1_Stromal	ENPP1	Stromal	Receptor	0.27664	0.324295	0.361616	-1.26293
CTGF_Stromal	CTGF	Stromal	ECM/Ligand	0.4823	0.669835	1.34986	0.77175
IFNGR1_Stromal	IFNGR1	Stromal	Receptor	0.0931689	0.16287	-0.460197	-3.07808
RNASET2_Stromal	RNASET2	Stromal	Ligand	0.100711	0.166224	-0.414977	-3.00347
SMOC2_Stromal	SMOC2	Stromal	ECM/Ligand	0.0710943	0.129234	-0.344921	-3.29648
THBS2_Stromal	THBS2	Stromal	ECM/Ligand	0.308322	0.437177	0.244183	-0.949478
FAM20C_Stromal	FAM20C	Stromal	Ligand	0.300301	0.491405	-0.00387284	-1.02884
PDGFA_Stromal	PDGFA	Stromal	Ligand	0.0403857	0.116608	-0.500524	-3.60029
GPNMB_Stromal	GPNMB	Stromal	Receptor	0.0815547	0.141067	-0.367797	-3.19299
SFRP4_Stromal	SFRP4	Stromal	Ligand	0.510296	0.728768	1.50519	1.04873
INHBA_Stromal	INHBA	Stromal	Ligand	0.138214	0.179502	-0.154729	-2.63243
DBNL_Stromal	DBNL	Stromal	Ligand	0.131052	0.210482	-0.45529	-2.70328
FZD1_Stromal	FZD1	Stromal	Receptor	0.0658703	0.140089	-0.512971	-3.34816
COL1A2_Stromal	COL1A2	Stromal	ECM/Ligand	0.782544	0.999674	3.74266	3.74219
PCOLCE_Stromal	PCOLCE	Stromal	ECM/Ligand	0.562012	0.987841	1.57802	1.56038
SERPINE1_Stromal	SERPINE1	Stromal	ECM/Ligand	0.193102	0.230701	0.0263519	-2.0894
LRRC17_Stromal	LRRC17	Stromal	Ligand	0.201253	0.275146	-0.147159	-2.00876
LAMB1_Stromal	LAMB1	Stromal	ECM/Ligand	0.147924	0.228372	-0.406024	-2.53636
FAM3C_Stromal	FAM3C	Stromal	Ligand	0.166678	0.257303	-0.392535	-2.35082
HILPDA_Stromal	HILPDA	Stromal	Ligand	0.0285782	0.103937	-0.451421	-3.7171
DHRSX_Stromal	DHRSX	Stromal	Ligand	0.0807133	0.157466	-0.534775	-3.20131
SRPX_Stromal	SRPX	Stromal	Ligand	0.260338	0.377638	-0.0193588	-1.42421
ATP6AP2_Stromal	ATP6AP2	Stromal	Receptor	0.247818	0.398369	-0.220336	-1.54808
TIMP1_Stromal	TIMP1	Stromal	ECM/Ligand	0.673385	0.998742	2.66405	2.66224
EBP_Stromal	EBP	Stromal	Receptor	0.0107176	0.0991381	-0.560004	-3.89381
EFNB1_Stromal	EFNB1	Stromal	Ligand	0.098412	0.165059	-0.427579	-3.02621
LPAR4_Stromal	LPAR4	Stromal	Receptor	0.0208054	0.102958	-0.514707	-3.794
SRPX2_Stromal	SRPX2	Stromal	Ligand	0.0463471	0.124528	-0.536322	-3.54131
IL13RA1_Stromal	IL13RA1	Stromal	Receptor	0.0172329	0.102027	-0.53695	-3.82935
GPC4_Stromal	GPC4	Stromal	ECM/Ligand	0.0645309	0.137293	-0.497149	-3.36141
BGN_Stromal	BGN	Stromal	ECM/Ligand	0.437596	0.719637	0.804129	0.329479
CTSB_Stromal	CTSB	Stromal	ECM/Ligand	0.435713	0.813091	0.60935	0.310845
PDGFRL_Stromal	PDGFRL	Stromal	Receptor	0.0982911	0.150478	-0.295344	-3.02741
BMP1_Stromal	BMP1	Stromal	ECM/Ligand	0.127963	0.206103	-0.45553	-2.73385
LOXL2_Stromal	LOXL2	Stromal	ECM/Receptor/Ligand	0.00631539	0.0935476	-0.519842	-3.93736
CLU_Stromal	CLU	Stromal	ECM/Ligand	0.33185	0.348521	0.803919	-0.716715
FGFR1_Stromal	FGFR1	Stromal	Receptor	0.467515	0.866667	0.831927	0.62548
ADAM9_Stromal	ADAM9	Stromal	ECM/Receptor/Ligand	0.0400573	0.120335	-0.549161	-3.60354
SULF1_Stromal	SULF1	Stromal	Ligand	0.277819	0.414675	0.0186255	-1.25126
MMP16_Stromal	MMP16	Stromal	ECM/Ligand	0.0109927	0.0931283	-0.467067	-3.89109
MATN2_Stromal	MATN2	Stromal	ECM/Ligand	0.0813789	0.144468	-0.403904	-3.19473
CTHRC1_Stromal	CTHRC1	Stromal	ECM/Ligand	0.329761	0.491451	0.28746	-0.737381
ENPP2_Stromal	ENPP2	Stromal	Receptor	0.320093	0.498719	0.170635	-0.833025
WISP1_Stromal	WISP1	Stromal	ECM/Ligand	0.0700657	0.140275	-0.47337	-3.30665
SLC52A2_Stromal	SLC52A2	Stromal	Receptor	0.0533282	0.132774	-0.559732	-3.47224
PTPRD_Stromal	PTPRD	Stromal	Receptor	0.123794	0.199161	-0.447356	-2.77509
STOML2_Stromal	STOML2	Stromal	Ligand	0.122447	0.203634	-0.492721	-2.78842
TMEM2_Stromal	TMEM2	Stromal	Receptor	0.114111	0.179269	-0.391358	-2.87089
ANXA1_Stromal	ANXA1	Stromal	ECM/Ligand	0.456612	0.898346	0.672268	0.517615
GAS1_Stromal	GAS1	Stromal	Receptor	0.0392636	0.110412	-0.432861	-3.61139
S1PR3_Stromal	S1PR3	Stromal	Receptor	0.0473146	0.116329	-0.428488	-3.53174
ROR2_Stromal	ROR2	Stromal	Receptor	0.101071	0.172793	-0.467325	-2.99991
OGN_Stromal	OGN	Stromal	ECM/Ligand	0.182888	0.180433	0.279838	-2.19045
OMD_Stromal	OMD	Stromal	ECM/Ligand	0.264569	0.37652	0.0267805	-1.38235
ASPN_Stromal	ASPN	Stromal	ECM/Ligand	0.291709	0.214628	1.10616	-1.11384
COL15A1_Stromal	COL15A1	Stromal	ECM/Ligand	0.0328639	0.102492	-0.388819	-3.6747
TGFBR1_Stromal	TGFBR1	Stromal	Receptor	0.0941823	0.162264	-0.444794	-3.06806
ABCA1_Stromal	ABCA1	Stromal	Receptor	0.00141281	0.0894014	-0.502965	-3.98586
LPAR1_Stromal	LPAR1	Stromal	Receptor	0.0547543	0.132541	-0.543085	-3.45813
COL27A1_Stromal	COL27A1	Stromal	ECM/Ligand	0.0992904	0.156627	-0.343238	-3.01752
TNC_Stromal	TNC	Stromal	ECM/Ligand	0.431249	0.691824	0.798196	0.266685
GSN_Stromal	GSN	Stromal	Ligand	0.340925	0.604566	0.0990757	-0.626926
OLFML2A_Stromal	OLFML2A	Stromal	ECM/Ligand	0.229566	0.352248	-0.223412	-1.72865
ANGPTL2_Stromal	ANGPTL2	Stromal	Ligand	0.0257569	0.100815	-0.435356	-3.74502
ENG_Stromal	ENG	Stromal	Receptor	0.0926882	0.164221	-0.476872	-3.08284
CERCAM_Stromal	CERCAM	Stromal	Receptor	0.216989	0.338411	-0.290038	-1.85308
COL5A1_Stromal	COL5A1	Stromal	ECM/Ligand	0.444952	0.79208	0.738524	0.40225
DPP7_Stromal	DPP7	Stromal	ECM/Ligand	0.220817	0.346611	-0.286701	-1.81521
BAMBI_Stromal	BAMBI	Stromal	Receptor	0.056176	0.119031	-0.373916	-3.44407
ITGB1_Stromal	ITGB1	Stromal	ECM/Receptor/Ligand	0.375885	0.663359	0.311064	-0.281055
NRP1_Stromal	NRP1	Stromal	Receptor	0.0581075	0.130398	-0.486384	-3.42496
SRGN_Stromal	SRGN	Stromal	Ligand	0.108198	0.154344	-0.233909	-2.92939
PSAP_Stromal	PSAP	Stromal	Ligand	0.432314	0.854368	0.504285	0.277219
ANXA7_Stromal	ANXA7	Stromal	Ligand	0.153434	0.24109	-0.429694	-2.48185
FAS_Stromal	FAS	Stromal	Receptor	0.0651911	0.134638	-0.46244	-3.35488
CRTAC1_Stromal	CRTAC1	Stromal	ECM/Ligand	0.00173279	0.0759376	-0.264325	-3.9827
SMC3_Stromal	SMC3	Stromal	ECM/Ligand	0.137336	0.217657	-0.441466	-2.64112
FGFR2_Stromal	FGFR2	Stromal	ECM/Receptor/Ligand	0.116446	0.181877	-0.389099	-2.84779
HTRA1_Stromal	HTRA1	Stromal	ECM/Ligand	0.436327	0.75304	0.726118	0.316925
CD151_Stromal	CD151	Stromal	Ligand	0.336513	0.581179	0.112339	-0.670577
TSPAN4_Stromal	TSPAN4	Stromal	Receptor	0.276769	0.445376	-0.0948079	-1.26165
CHID1_Stromal	CHID1	Stromal	Receptor	0.149009	0.237084	-0.449298	-2.52563
CTSD_Stromal	CTSD	Stromal	ECM/Ligand	0.301664	0.478919	0.0467473	-1.01535
TSPAN32_Stromal	TSPAN32	Stromal	Receptor	0.0139005	0.102446	-0.575849	-3.86232
DKK3_Stromal	DKK3	Stromal	Ligand	0.0157717	0.0989052	-0.506588	-3.8438
NUCB2_Stromal	NUCB2	Stromal	Ligand	0.2398	0.358537	-0.147686	-1.6274
SAA1_Stromal	SAA1	Stromal	Ligand	0.137888	0.0999767	0.686353	-2.63565
FIBIN_Stromal	FIBIN	Stromal	Ligand	0.150516	0.179734	-0.0348731	-2.51072
CD44_Stromal	CD44	Stromal	Receptor	0.282585	0.428838	0.0173265	-1.20411
HSD17B12_Stromal	HSD17B12	Stromal	ECM/Ligand	0.0682035	0.143955	-0.529161	-3.32507
MDK_Stromal	MDK	Stromal	Ligand	0.367983	0.542371	0.523391	-0.359229
SERPING1_Stromal	SERPING1	Stromal	ECM/Ligand	0.450902	0.811693	0.762107	0.46112
VEGFB_Stromal	VEGFB	Stromal	Ligand	0.0063756	0.096669	-0.566596	-3.93676
LTBP3_Stromal	LTBP3	Stromal	ECM/Receptor/Ligand	0.296577	0.481761	-0.0121172	-1.06568
EFEMP2_Stromal	EFEMP2	Stromal	ECM/Ligand	0.265855	0.436245	-0.172904	-1.36963
CTSF_Stromal	CTSF	Stromal	Ligand	0.157342	0.24519	-0.415352	-2.44319
AIP_Stromal	AIP	Stromal	Receptor	0.104613	0.182437	-0.510624	-2.96486
TMEM123_Stromal	TMEM123	Stromal	Receptor	0.164342	0.253809	-0.395926	-2.37394
MMP13_Stromal	MMP13	Stromal	ECM/Ligand	0.4792	0.635593	1.39489	0.741079
PDGFD_Stromal	PDGFD	Stromal	Ligand	0.23047	0.329932	-0.12005	-1.71971
CADM1_Stromal	CADM1	Stromal	Receptor	0.128853	0.187235	-0.308215	-2.72505
THY1_Stromal	THY1	Stromal	Receptor	0.358916	0.508922	0.525521	-0.448933
WNT5B_Stromal	WNT5B	Stromal	ECM/Ligand	0.132599	0.203913	-0.394249	-2.68799
CD9_Stromal	CD9	Stromal	Receptor	0.314077	0.459958	0.227831	-0.892548
TNFRSF1A_Stromal	TNFRSF1A	Stromal	Receptor	0.216077	0.33734	-0.29449	-1.86211
CD4_Stromal	CD4	Stromal	ECM/Receptor/Ligand	0.00690417	0.0914046	-0.480581	-3.93153
C1S_Stromal	C1S	Stromal	Ligand	0.423054	0.731703	0.636263	0.185604
C1R_Stromal	C1R	Stromal	Ligand	0.361784	0.616818	0.276497	-0.420563
M6PR_Stromal	M6PR	Stromal	Receptor	0.00652973	0.0957372	-0.551098	-3.93524
A2M_Stromal	A2M	Stromal	Ligand	0.268121	0.358817	0.131396	-1.34721
CLEC2B_Stromal	CLEC2B	Stromal	Receptor	0.16112	0.230887	-0.291259	-2.40581
KLRD1_Stromal	KLRD1	Stromal	Receptor	0.0265237	0.100629	-0.425098	-3.73743
KLRC2_Stromal	KLRC2	Stromal	Receptor	0.17868	0.246122	-0.209686	-2.23208
MGP_Stromal	MGP	Stromal	ECM/Ligand	0.207583	0.159283	0.70406	-1.94613
ITPR2_Stromal	ITPR2	Stromal	Receptor	0.0794089	0.150943	-0.486656	-3.21422
NR4A1_Stromal	NR4A1	Stromal	Receptor	0.0275607	0.087631	-0.215311	-3.72717
IGFBP6_Stromal	IGFBP6	Stromal	Ligand	0.237168	0.260144	0.289072	-1.65344
RARG_Stromal	RARG	Stromal	Receptor	0.0785455	0.1529	-0.51378	-3.22276
LRP1_Stromal	LRP1	Stromal	Receptor	0.325202	0.544514	0.094437	-0.782485
GLIPR1_Stromal	GLIPR1	Stromal	Ligand	0.0955699	0.152621	-0.342671	-3.05433
LUM_Stromal	LUM	Stromal	ECM/Ligand	0.673841	0.997671	2.67011	2.66675
DCN_Stromal	DCN	Stromal	ECM/Ligand	0.685204	0.99795	2.78213	2.77917
HSP90B1_Stromal	HSP90B1	Stromal	ECM/Ligand	0.368072	0.629863	0.308522	-0.358348
TDG_Stromal	TDG	Stromal	Ligand	0.105566	0.177172	-0.458951	-2.95543
FGF9_Stromal	FGF9	Stromal	ECM/Ligand	0.00846768	0.0942464	-0.509275	-3.91607
TNFRSF19_Stromal	TNFRSF19	Stromal	Receptor	0.136383	0.209504	-0.395827	-2.65055
HMGB1_Stromal	HMGB1	Stromal	Ligand	0.474959	0.941346	0.786332	0.699131
NHLRC3_Stromal	NHLRC3	Stromal	Ligand	0.0047489	0.0918705	-0.509248	-3.95286
TNFSF11_Stromal	TNFSF11	Stromal	Receptor/Ligand	0.096442	0.161146	-0.412458	-3.0457
LPAR6_Stromal	LPAR6	Stromal	Receptor	0.0189533	0.102259	-0.523213	-3.81233
GPC6_Stromal	GPC6	Stromal	ECM/Ligand	0.0919695	0.165572	-0.495803	-3.08995
ITGBL1_Stromal	ITGBL1	Stromal	Ligand	0.0903126	0.159189	-0.455488	-3.10634
MMP14_Stromal	MMP14	Stromal	ECM/Ligand	0.338517	0.546471	0.221	-0.65075
SLC22A17_Stromal	SLC22A17	Stromal	Receptor	0.022841	0.109527	-0.583784	-3.77386
DHRS4L2_Stromal	DHRS4L2	Stromal	Ligand	0.102907	0.181225	-0.517895	-2.98174
NID2_Stromal	NID2	Stromal	ECM/Ligand	0.0499563	0.124435	-0.499524	-3.5056
LGALS3_Stromal	LGALS3	Stromal	ECM/Ligand	0.382302	0.697927	0.301268	-0.217569
SMOC1_Stromal	SMOC1	Stromal	ECM/Ligand	0.152858	0.218775	-0.295277	-2.48756
NPC2_Stromal	NPC2	Stromal	Ligand	0.450969	0.870161	0.66242	0.461778
LTBP2_Stromal	LTBP2	Stromal	ECM/Receptor/Ligand	0.190767	0.281155	-0.282081	-2.1125
PGF_Stromal	PGF	Stromal	Ligand	0.0759784	0.13161	-0.322869	-3.24815
TGFB3_Stromal	TGFB3	Stromal	ECM/Ligand	0.114428	0.18211	-0.410912	-2.86775
FLRT2_Stromal	FLRT2	Stromal	ECM/Ligand	0.0823394	0.15318	-0.478872	-3.18522
IFI27_Stromal	IFI27	Stromal	Receptor	0.445843	0.660424	1.0096	0.411073
IFI27L2_Stromal	IFI27L2	Stromal	Receptor	0.31933	0.546378	0.0314163	-0.840576
HSP90AA1_Stromal	HSP90AA1	Stromal	ECM/Ligand	0.460808	0.892383	0.723382	0.55912
CRIP2_Stromal	CRIP2	Stromal	ECM/Ligand	0.273468	0.421756	-0.0488531	-1.29431
NDN_Stromal	NDN	Stromal	ECM/Ligand	0.00195516	0.0914046	-0.529566	-3.9805
THBS1_Stromal	THBS1	Stromal	ECM/Ligand	0.042562	0.0970883	-0.214693	-3.57876
MFAP1_Stromal	MFAP1	Stromal	ECM/Ligand	0.00498731	0.0976473	-0.594863	-3.9505
B2M_Stromal	B2M	Stromal	Ligand	0.673329	0.999767	2.66202	2.66169
FBN1_Stromal	FBN1	Stromal	ECM/Ligand	0.307282	0.491824	0.0639737	-0.959767
FGF7_Stromal	FGF7	Stromal	Ligand	0.211489	0.278546	-0.0636104	-1.9075
ANXA2_Stromal	ANXA2	Stromal	ECM/Receptor/Ligand	0.534498	0.98253	1.3136	1.28817
ITGA11_Stromal	ITGA11	Stromal	Receptor	0.228583	0.358258	-0.257538	-1.73837
PKM_Stromal	PKM	Stromal	ECM/Ligand	0.486618	0.947915	0.891643	0.814474
NEO1_Stromal	NEO1	Stromal	Receptor	0.0158837	0.100722	-0.531741	-3.8427
NPTN_Stromal	NPTN	Stromal	Receptor/Ligand	0.0110807	0.0985791	-0.548253	-3.89021
CD276_Stromal	CD276	Stromal	Ligand	0.155933	0.241137	-0.405247	-2.45713
LOXL1_Stromal	LOXL1	Stromal	ECM/Ligand	0.196959	0.279432	-0.211946	-2.05124
ISLR_Stromal	ISLR	Stromal	Ligand	0.302739	0.412998	0.271027	-1.00471
KIAA1199_Stromal	KIAA1199	Stromal	Ligand	0.251924	0.31563	0.156156	-1.50745
ACAN_Stromal	ACAN	Stromal	ECM/Ligand	0.171603	0.212113	-0.0651839	-2.3021
HAPLN3_Stromal	HAPLN3	Stromal	ECM/Ligand	0.0741051	0.149126	-0.521672	-3.26669
MFGE8_Stromal	MFGE8	Stromal	ECM/Ligand	0.299795	0.483065	0.0158216	-1.03384
ANPEP_Stromal	ANPEP	Stromal	Receptor	0.0848811	0.144421	-0.368781	-3.16008
CHSY1_Stromal	CHSY1	Stromal	Ligand	0.0584987	0.132402	-0.504507	-3.42109
METRN_Stromal	METRN	Stromal	Ligand	0.170678	0.265409	-0.397703	-2.31125
NME3_Stromal	NME3	Stromal	Ligand	0.231312	0.369019	-0.273242	-1.71138
GFER_Stromal	GFER	Stromal	Ligand	0.0082383	0.0977405	-0.564062	-3.91834
PKD1_Stromal	PKD1	Stromal	Receptor	0.0115509	0.0973678	-0.525764	-3.88556
TNFRSF12A_Stromal	TNFRSF12A	Stromal	Receptor	0.263382	0.33897	0.166601	-1.39409
IL32_Stromal	IL32	Stromal	Ligand	0.278227	0.396366	0.0878016	-1.24723
IL4R_Stromal	IL4R	Stromal	Receptor	0.0120596	0.0987188	-0.540608	-3.88053
TMEM219_Stromal	TMEM219	Stromal	Receptor	0.22785	0.365479	-0.293584	-1.74563
ALDOA_Stromal	ALDOA	Stromal	Ligand	0.364389	0.686606	0.147638	-0.394788
TGFB1I1_Stromal	TGFB1I1	Stromal	ECM/Ligand	0.182479	0.283019	-0.373621	-2.1945
MMP2_Stromal	MMP2	Stromal	ECM/Ligand	0.424308	0.730398	0.65125	0.198016
CKLF_Stromal	CKLF	Stromal	Ligand	0.214235	0.313021	-0.204772	-1.88032
CMTM3_Stromal	CMTM3	Stromal	Ligand	0.211067	0.318938	-0.263134	-1.91167
GLG1_Stromal	GLG1	Stromal	ECM/Ligand	0.166322	0.260238	-0.412427	-2.35435
GLOD4_Stromal	GLOD4	Stromal	Ligand	0.0578631	0.136175	-0.551339	-3.42738
SERPINF1_Stromal	SERPINF1	Stromal	ECM/Ligand	0.600347	0.948195	2.01639	1.93965
ITGAE_Stromal	ITGAE	Stromal	Receptor	0.0753123	0.152061	-0.537843	-3.25474
C1QBP_Stromal	C1QBP	Stromal	Ligand	0.192563	0.294805	-0.332706	-2.09473
TNFSF12_Stromal	TNFSF12	Stromal	Ligand	0.017583	0.106872	-0.600417	-3.82588
NTN1_Stromal	NTN1	Stromal	ECM/Ligand	0.0201503	0.0999301	-0.478124	-3.80048
EVI2A_Stromal	EVI2A	Stromal	Receptor	0.109869	0.181365	-0.450108	-2.91286
IGFBP4_Stromal	IGFBP4	Stromal	Ligand	0.053887	0.096669	-0.0963689	-3.46671
GRN_Stromal	GRN	Stromal	Ligand	0.305036	0.501002	0.0150768	-0.981991
COL1A1_Stromal	COL1A1	Stromal	ECM/Ligand	0.827491	1	4.18687	4.18687
CHAD_Stromal	CHAD	Stromal	ECM/Ligand	0.110994	0.132495	0.0139619	-2.90173
SPATA20_Stromal	SPATA20	Stromal	Ligand	0.0299667	0.113673	-0.566864	-3.70337
GPRC5C_Stromal	GPRC5C	Stromal	Receptor	0.124146	0.195993	-0.420745	-2.77162
MXRA7_Stromal	MXRA7	Stromal	Receptor	0.0581002	0.13529	-0.539584	-3.42503
TIMP2_Stromal	TIMP2	Stromal	ECM/Ligand	0.35102	0.590077	0.233947	-0.527051
LGALS3BP_Stromal	LGALS3BP	Stromal	ECM/Receptor/Ligand	0.345685	0.589518	0.182533	-0.579832
P4HB_Stromal	P4HB	Stromal	Receptor	0.368895	0.662008	0.244848	-0.350212
COLEC12_Stromal	COLEC12	Stromal	Receptor	0.20916	0.31754	-0.27566	-1.93053
TWSG1_Stromal	TWSG1	Stromal	Ligand	0.0175446	0.10608	-0.590066	-3.82626
PTPRA_Stromal	PTPRA	Stromal	Receptor	0.058173	0.136921	-0.556147	-3.42431
BMP2_Stromal	BMP2	Stromal	Ligand	0.0664311	0.129513	-0.394186	-3.34261
JAG1_Stromal	JAG1	Stromal	Ligand	0.0770548	0.139017	-0.391211	-3.23751
CST3_Stromal	CST3	Stromal	ECM/Ligand	0.563874	0.995248	1.58568	1.5788
WISP2_Stromal	WISP2	Stromal	ECM/Ligand	0.269833	0.339064	0.230022	-1.33027
SLPI_Stromal	SLPI	Stromal	ECM/Ligand	0.336	0.264663	1.24207	-0.67565
SDC4_Stromal	SDC4	Stromal	Receptor	0.0271867	0.106266	-0.497168	-3.73087
PLTP_Stromal	PLTP	Stromal	ECM/Ligand	0.143161	0.20997	-0.331955	-2.58348
MMP9_Stromal	MMP9	Stromal	ECM/Ligand	0.32095	0.485954	0.216518	-0.824549
CBLN4_Stromal	CBLN4	Stromal	Ligand	0.0211012	0.103611	-0.520889	-3.79108
BSG_Stromal	BSG	Stromal	Receptor	0.351268	0.624738	0.154054	-0.524598
C19orf10_Stromal	C19orf10	Stromal	Ligand	0.321615	0.548847	0.0475141	-0.817974
PTPRS_Stromal	PTPRS	Stromal	Receptor	0.0777924	0.145679	-0.451441	-3.23021
CD320_Stromal	CD320	Stromal	Receptor	0.18185	0.28218	-0.375567	-2.20073
HNRNPM_Stromal	HNRNPM	Stromal	ECM/Ligand	0.214271	0.334358	-0.299552	-1.87997
COL5A3_Stromal	COL5A3	Stromal	ECM/Ligand	0.132149	0.184347	-0.253172	-2.69244
TMED1_Stromal	TMED1	Stromal	Receptor	0.130711	0.213883	-0.481788	-2.70666
DNASE2_Stromal	DNASE2	Stromal	Ligand	0.107909	0.187561	-0.51797	-2.93225
NOTCH3_Stromal	NOTCH3	Stromal	Receptor	0.254393	0.381784	-0.093936	-1.48303
GDF15_Stromal	GDF15	Stromal	Ligand	0.0491506	0.0761239	0.201449	-3.51357
GPI_Stromal	GPI	Stromal	Ligand	0.00749791	0.0967156	-0.556182	-3.92566
TYROBP_Stromal	TYROBP	Stromal	Ligand	0.0657886	0.110179	-0.167308	-3.34897
LTBP4_Stromal	LTBP4	Stromal	ECM/Receptor/Ligand	0.0566011	0.128302	-0.47791	-3.43986
MIA_Stromal	MIA	Stromal	Ligand	0.205011	0.291544	-0.1935	-1.97159
AXL_Stromal	AXL	Stromal	Receptor	0.111703	0.183788	-0.451107	-2.89472
TGFB1_Stromal	TGFB1	Stromal	ECM/Ligand	0.274203	0.438295	-0.0970726	-1.28704
PLAUR_Stromal	PLAUR	Stromal	Receptor	0.240143	0.359655	-0.148781	-1.624
PVRL2_Stromal	PVRL2	Stromal	Receptor	0.203176	0.315164	-0.324039	-1.98974
APOE_Stromal	APOE	Stromal	ECM/Ligand	0.533764	0.703424	1.78843	1.28091
APOC1_Stromal	APOC1	Stromal	Ligand	0.13285	0.165758	-0.0928938	-2.6855
SLC1A5_Stromal	SLC1A5	Stromal	Receptor	0.0214353	0.105195	-0.53947	-3.78777
FCGRT_Stromal	FCGRT	Stromal	Receptor	0.336686	0.578942	0.119613	-0.668864
NR1H2_Stromal	NR1H2	Stromal	Receptor	0.0505349	0.130678	-0.564416	-3.49988
CLEC11A_Stromal	CLEC11A	Stromal	Ligand	0.508182	0.914139	1.15733	1.02782
MYADM_Stromal	MYADM	Stromal	Receptor	0.0702936	0.138924	-0.457153	-3.3044
A1BG_Stromal	A1BG	Stromal	Ligand	0.131444	0.205125	-0.414218	-2.69941
SCARF2_Stromal	SCARF2	Stromal	Receptor	0.0219276	0.104915	-0.530759	-3.7829
MIF_Stromal	MIF	Stromal	Ligand	0.310009	0.477009	0.135077	-0.932789
GGT5_Stromal	GGT5	Stromal	Receptor	0.133095	0.197391	-0.342443	-2.68308
TIMP3_Stromal	TIMP3	Stromal	ECM/Ligand	0.557253	0.902492	1.6613	1.51329
LGALS1_Stromal	LGALS1	Stromal	ECM/Ligand	0.731911	0.999953	3.24133	3.24126
FBLN1_Stromal	FBLN1	Stromal	ECM/Receptor/Ligand	0.310001	0.405218	0.370303	-0.932876
CRELD2_Stromal	CRELD2	Stromal	ECM/Ligand	0.145724	0.227067	-0.419531	-2.55813
PLXNB2_Stromal	PLXNB2	Stromal	Receptor	0.167297	0.255858	-0.378291	-2.3447
APP_Stromal	APP	Stromal	Receptor/Ligand	0.236929	0.371768	-0.228365	-1.6558
SOD1_Stromal	SOD1	Stromal	ECM/Ligand	0.296915	0.500489	-0.0637969	-1.06234
IL10RB_Stromal	IL10RB	Stromal	Receptor	0.0863911	0.161985	-0.519407	-3.14514
IFNAR1_Stromal	IFNAR1	Stromal	Receptor	0.0738681	0.148614	-0.519051	-3.26903
IFNGR2_Stromal	IFNGR2	Stromal	Receptor	0.165213	0.255812	-0.398654	-2.36532
RUNX1_Stromal	RUNX1	Stromal	ECM/Ligand	0.0301112	0.106918	-0.477051	-3.70194
ITGB2_Stromal	ITGB2	Stromal	Receptor	0.0733757	0.138458	-0.421806	-3.2739
COL18A1_Stromal	COL18A1	Stromal	ECM/Ligand	0.0441116	0.101514	-0.263665	-3.56343
COL6A1_Stromal	COL6A1	Stromal	ECM/Ligand	0.590389	0.986676	1.86047	1.84112
COL6A2_Stromal	COL6A2	Stromal	ECM/Ligand	0.603252	0.993338	1.97802	1.96838
SDF4_Macrophages	SDF4	Macrophages	Ligand	0.147242	0.216216	-0.405143	-2.61438
TNFRSF14_Macrophages	TNFRSF14	Macrophages	Receptor	0.132804	0.195122	-0.392821	-2.75012
AGTRAP_Macrophages	AGTRAP	Macrophages	Receptor	0.0709476	0.13975	-0.493061	-3.33175
TNFRSF1B_Macrophages	TNFRSF1B	Macrophages	Receptor	0.163099	0.233026	-0.364029	-2.46527
IGSF21_Macrophages	IGSF21	Macrophages	Ligand	0.0373543	0.105142	-0.398539	-3.64762
C1QA_Macrophages	C1QA	Macrophages	Ligand	0.658599	0.927159	2.30289	2.19378
C1QC_Macrophages	C1QC	Macrophages	Ligand	0.590341	0.87706	1.74121	1.55196
C1QB_Macrophages	C1QB	Macrophages	Ligand	0.570667	0.812129	1.6672	1.36698
PTAFR_Macrophages	PTAFR	Macrophages	Receptor	0.148539	0.219183	-0.412598	-2.60218
COL16A1_Macrophages	COL16A1	Macrophages	ECM/Ligand	0.064389	0.0965722	-0.0216037	-3.39342
CSF3R_Macrophages	CSF3R	Macrophages	Receptor	0.057385	0.130191	-0.518416	-3.45927
PPT1_Macrophages	PPT1	Macrophages	ECM/Ligand	0.232257	0.337508	-0.2481	-1.815
TM2D1_Macrophages	TM2D1	Macrophages	Receptor	0.0176896	0.100198	-0.514029	-3.83252
CYR61_Macrophages	CYR61	Macrophages	ECM/Ligand	0.0789548	0.0761371	0.458392	-3.25646
VCAM1_Macrophages	VCAM1	Macrophages	Ligand	0.122254	0.138761	-0.000283871	-2.84933
OLFML3_Macrophages	OLFML3	Macrophages	Ligand	0.1285	0.143045	0.0145875	-2.79059
CD58_Macrophages	CD58	Macrophages	Receptor	0.0481103	0.118985	-0.475803	-3.54648
NOTCH2_Macrophages	NOTCH2	Macrophages	Receptor	0.0210427	0.101516	-0.501346	-3.80099
ITGA10_Macrophages	ITGA10	Macrophages	Receptor	0.0658064	0.0962426	-0.0033403	-3.38009
FCGR1A_Macrophages	FCGR1A	Macrophages	Receptor	0.141709	0.1971	-0.323624	-2.66639
ECM1_Macrophages	ECM1	Macrophages	ECM/Ligand	0.029965	0.110415	-0.538644	-3.7171
S100A9_Macrophages	S100A9	Macrophages	Ligand	0.377558	0.398154	0.87979	-0.448773
S100A8_Macrophages	S100A8	Macrophages	Ligand	0.0680542	0.0936058	0.0578778	-3.35895
S100A4_Macrophages	S100A4	Macrophages	Ligand	0.596315	0.980224	1.63695	1.60814
S100A13_Macrophages	S100A13	Macrophages	Ligand	0.132981	0.160844	-0.112455	-2.74846
SLC39A1_Macrophages	SLC39A1	Macrophages	Receptor	0.111776	0.175676	-0.43913	-2.94785
IL6R_Macrophages	IL6R	Macrophages	Receptor	0.0335121	0.108438	-0.479208	-3.68374
ADAM15_Macrophages	ADAM15	Macrophages	ECM/Ligand	0.00201048	0.089321	-0.495748	-3.97994
SEMA4A_Macrophages	SEMA4A	Macrophages	Receptor	0.156215	0.208635	-0.269266	-2.53
BGLAP_Macrophages	BGLAP	Macrophages	Ligand	0.0572388	0.0866842	0.066977	-3.46065
APOA1BP_Macrophages	APOA1BP	Macrophages	Ligand	0.049176	0.124588	-0.532163	-3.53646
HDGF_Macrophages	HDGF	Macrophages	Ligand	0.0754255	0.138761	-0.440701	-3.28964
CD84_Macrophages	CD84	Macrophages	Receptor	0.281503	0.409031	-0.0622992	-1.35195
CD48_Macrophages	CD48	Macrophages	Receptor	0.0622016	0.130191	-0.473113	-3.41398
FCER1G_Macrophages	FCER1G	Macrophages	Receptor	0.531708	0.867502	1.20571	1.00065
FCGR2A_Macrophages	FCGR2A	Macrophages	Receptor	0.333549	0.491101	0.163288	-0.862579
FCGR3A_Macrophages	FCGR3A	Macrophages	Receptor	0.255864	0.330916	0.00233919	-1.59303
FCGR2B_Macrophages	FCGR2B	Macrophages	Receptor	0.14572	0.187541	-0.214198	-2.62869
CREG1_Macrophages	CREG1	Macrophages	Ligand	0.308159	0.455504	0.033099	-1.10131
TPR_Macrophages	TPR	Macrophages	Receptor	0.127182	0.183256	-0.355184	-2.80299
PTPRC_Macrophages	PTPRC	Macrophages	Receptor	0.197956	0.285432	-0.328882	-2.13752
RNPEP_Macrophages	RNPEP	Macrophages	Ligand	0.0975831	0.163481	-0.468817	-3.0813
ADIPOR1_Macrophages	ADIPOR1	Macrophages	Receptor	0.117642	0.185234	-0.460388	-2.89269
IL10_Macrophages	IL10	Macrophages	Ligand	0.0897424	0.120303	-0.100133	-3.15503
CD55_Macrophages	CD55	Macrophages	Receptor	0.0155137	0.0945946	-0.451479	-3.85298
CD46_Macrophages	CD46	Macrophages	Receptor	0.0362565	0.113052	-0.513512	-3.65794
NENF_Macrophages	NENF	Macrophages	Ligand	0.249298	0.355636	-0.163335	-1.65477
ADAM17_Macrophages	ADAM17	Macrophages	ECM/Ligand	0.0365477	0.110745	-0.481027	-3.6552
HPCAL1_Macrophages	HPCAL1	Macrophages	ECM/Ligand	0.0737124	0.136783	-0.436105	-3.30575
EMILIN1_Macrophages	EMILIN1	Macrophages	ECM/Ligand	0.0097485	0.0758075	-0.186307	-3.90719
ANTXR1_Macrophages	ANTXR1	Macrophages	Receptor	0.0202366	0.0899802	-0.334906	-3.80857
MGAT4A_Macrophages	MGAT4A	Macrophages	Ligand	0.133936	0.205999	-0.460436	-2.73949
MERTK_Macrophages	MERTK	Macrophages	Receptor	0.117341	0.185234	-0.463224	-2.89552
SLC20A1_Macrophages	SLC20A1	Macrophages	Receptor	0.0645479	0.120303	-0.337094	-3.39192
IL1B_Macrophages	IL1B	Macrophages	Ligand	0.191622	0.158207	0.462858	-2.19708
IL1RN_Macrophages	IL1RN	Macrophages	Ligand	0.0256808	0.0748187	-0.0174969	-3.75738
MARCO_Macrophages	MARCO	Macrophages	Receptor	0.0878905	0.114041	-0.0404275	-3.17244
CXCR4_Macrophages	CXCR4	Macrophages	Receptor	0.229782	0.288728	-0.0461741	-1.83828
NR4A2_Macrophages	NR4A2	Macrophages	Receptor	0.411461	0.607779	0.588372	-0.12999
ITGAV_Macrophages	ITGAV	Macrophages	ECM/Receptor/Ligand	0.144055	0.20468	-0.356009	-2.64434
COL3A1_Macrophages	COL3A1	Macrophages	ECM/Ligand	0.491837	0.692156	1.15659	0.625765
COL5A2_Macrophages	COL5A2	Macrophages	ECM/Ligand	0.246055	0.317403	-0.0297451	-1.68526
SLC40A1_Macrophages	SLC40A1	Macrophages	Receptor	0.480442	0.653922	1.13141	0.518614
NRP2_Macrophages	NRP2	Macrophages	Receptor	0.276505	0.345089	0.135936	-1.39894
FN1_Macrophages	FN1	Macrophages	ECM/Ligand	0.470738	0.725115	0.89108	0.427372
SERPINE2_Macrophages	SERPINE2	Macrophages	ECM/Ligand	0.129285	0.132169	0.136053	-2.78322
COL6A3_Macrophages	COL6A3	Macrophages	ECM/Ligand	0.197827	0.215557	0.0749648	-2.13874
TGFBR2_Macrophages	TGFBR2	Macrophages	Receptor	0.108951	0.166117	-0.384985	-2.97441
CMTM7_Macrophages	CMTM7	Macrophages	Receptor	0.111374	0.178972	-0.469724	-2.95163
CMTM6_Macrophages	CMTM6	Macrophages	Ligand	0.200123	0.286421	-0.313497	-2.11715
GLB1_Macrophages	GLB1	Macrophages	Ligand	0.0026294	0.0936058	-0.557521	-3.97413
CRTAP_Macrophages	CRTAP	Macrophages	ECM/Ligand	0.109569	0.175016	-0.454461	-2.9686
RPSA_Macrophages	RPSA	Macrophages	Receptor	0.40456	0.755438	0.209716	-0.194885
CCR1_Macrophages	CCR1	Macrophages	Receptor	0.150904	0.21325	-0.35077	-2.57994
PTH1R_Macrophages	PTH1R	Macrophages	Receptor	0.0956248	0.113052	0.0448771	-3.09971
LAMB2_Macrophages	LAMB2	Macrophages	ECM/Ligand	0.0189262	0.0945946	-0.41938	-3.82089
MANF_Macrophages	MANF	Macrophages	Ligand	0.151976	0.204021	-0.27687	-2.56986
NISCH_Macrophages	NISCH	Macrophages	Receptor	0.100749	0.162492	-0.430292	-3.05154
STAB1_Macrophages	STAB1	Macrophages	Receptor	0.432559	0.691826	0.599887	0.0683818
CD47_Macrophages	CD47	Macrophages	Receptor	0.117601	0.183586	-0.447881	-2.89307
CCDC80_Macrophages	CCDC80	Macrophages	ECM/Ligand	0.160813	0.179301	-0.00744045	-2.48677
FSTL1_Macrophages	FSTL1	Macrophages	Ligand	0.0286323	0.0853659	-0.179987	-3.72963
CD86_Macrophages	CD86	Macrophages	Receptor	0.117118	0.172709	-0.364324	-2.89762
ITGB5_Macrophages	ITGB5	Macrophages	Receptor	0.100191	0.147001	-0.290999	-3.05678
PLXNA1_Macrophages	PLXNA1	Macrophages	Receptor	0.000404664	0.0899802	-0.521462	-3.99504
TPRA1_Macrophages	TPRA1	Macrophages	Receptor	0.035274	0.112063	-0.51008	-3.66718
PLXND1_Macrophages	PLXND1	Macrophages	Receptor	0.260562	0.394529	-0.207137	-1.54885
PLSCR1_Macrophages	PLSCR1	Macrophages	ECM/Ligand	0.130773	0.194792	-0.409486	-2.76923
RARRES1_Macrophages	RARRES1	Macrophages	Ligand	0.00983172	0.094265	-0.499893	-3.9064
TNFSF10_Macrophages	TNFSF10	Macrophages	Ligand	0.0101408	0.0837179	-0.325806	-3.9035
TFRC_Macrophages	TFRC	Macrophages	Receptor	0.0782669	0.121951	-0.227689	-3.26293
C4orf48_Macrophages	C4orf48	Macrophages	Ligand	0.356288	0.579763	0.137669	-0.648767
LRPAP1_Macrophages	LRPAP1	Macrophages	Receptor	0.143984	0.211272	-0.402406	-2.645
IGFBP7_Macrophages	IGFBP7	Macrophages	ECM/Ligand	0.0992098	0.12261	-0.0384964	-3.06601
IL8_Macrophages	IL8	Macrophages	Ligand	0.348694	0.37739	0.685657	-0.72017
CXCL1_Macrophages	CXCL1	Macrophages	Ligand	0.136188	0.122281	0.313159	-2.71831
CXCL3_Macrophages	CXCL3	Macrophages	Ligand	0.412909	0.448583	1.04015	-0.11638
CXCL2_Macrophages	CXCL2	Macrophages	Ligand	0.372059	0.458471	0.624585	-0.500478
HSD17B11_Macrophages	HSD17B11	Macrophages	Ligand	0.0854014	0.150626	-0.465245	-3.19584
IBSP_Macrophages	IBSP	Macrophages	Ligand	0.434378	0.621951	0.770603	0.0854932
SPP1_Macrophages	SPP1	Macrophages	ECM/Ligand	0.491179	0.749506	1.03555	0.619572
AIMP1_Macrophages	AIMP1	Macrophages	Ligand	0.0980538	0.162162	-0.452709	-3.07688
ANXA5_Macrophages	ANXA5	Macrophages	Ligand	0.377196	0.657877	0.151914	-0.452174
TLR2_Macrophages	TLR2	Macrophages	Receptor	0.0267811	0.108108	-0.53813	-3.74703
PDGFC_Macrophages	PDGFC	Macrophages	Ligand	0.0179658	0.0952538	-0.438432	-3.82992
HMGB2_Macrophages	HMGB2	Macrophages	Ligand	0.126011	0.156229	-0.136016	-2.81401
IL7R_Macrophages	IL7R	Macrophages	Receptor	0.111746	0.124918	0.0525142	-2.94813
SLC1A3_Macrophages	SLC1A3	Macrophages	ECM/Ligand	0.192836	0.271589	-0.305309	-2.18566
PTGER4_Macrophages	PTGER4	Macrophages	Receptor	0.0251909	0.102835	-0.480941	-3.76199
IL6ST_Macrophages	IL6ST	Macrophages	Receptor	0.0232409	0.103494	-0.508502	-3.78032
ERBB2IP_Macrophages	ERBB2IP	Macrophages	ECM/Ligand	0.0327577	0.112063	-0.533749	-3.69084
VCAN_Macrophages	VCAN	Macrophages	ECM/Ligand	0.0217663	0.0814107	-0.176133	-3.79419
SNX2_Macrophages	SNX2	Macrophages	Ligand	0.207387	0.291035	-0.268242	-2.04884
TGFBI_Macrophages	TGFBI	Macrophages	ECM/Ligand	0.441128	0.621292	0.835599	0.148958
SIL1_Macrophages	SIL1	Macrophages	Ligand	0.0493618	0.119644	-0.472002	-3.53471
HBEGF_Macrophages	HBEGF	Macrophages	Ligand	0.065866	0.113711	-0.2434	-3.37953
CD14_Macrophages	CD14	Macrophages	Receptor	0.515061	0.764997	1.2306	0.844126
NR3C1_Macrophages	NR3C1	Macrophages	Receptor	0.0786454	0.132828	-0.347379	-3.25937
CSF1R_Macrophages	CSF1R	Macrophages	Receptor	0.309956	0.470007	0.00477807	-1.08442
CD74_Macrophages	CD74	Macrophages	Receptor	0.711931	0.993078	2.70526	2.69524
GPX3_Macrophages	GPX3	Macrophages	Ligand	0.0585599	0.121622	-0.409138	-3.44823
SPARC_Macrophages	SPARC	Macrophages	ECM/Ligand	0.484444	0.73797	0.994608	0.55625
LY86_Macrophages	LY86	Macrophages	Ligand	0.19967	0.285761	-0.31443	-2.1214
HLA-F_Macrophages	HLA-F	Macrophages	Receptor	0.0143903	0.100198	-0.545064	-3.86354
HLA-A_Macrophages	HLA-A	Macrophages	Receptor	0.517752	0.960448	0.927656	0.869437
HLA-E_Macrophages	HLA-E	Macrophages	Receptor	0.378372	0.625906	0.234841	-0.441116
HLA-C_Macrophages	HLA-C	Macrophages	Receptor	0.440611	0.865854	0.3519	0.144101
HLA-B_Macrophages	HLA-B	Macrophages	Receptor	0.519503	0.959789	0.945108	0.885898
C2_Macrophages	C2	Macrophages	Ligand	0.226977	0.32004	-0.22108	-1.86464
HLA-DRA_Macrophages	HLA-DRA	Macrophages	Receptor	0.583056	0.895847	1.64214	1.48347
HLA-DRB1_Macrophages	HLA-DRB1	Macrophages	Receptor	0.553559	0.904087	1.35158	1.20611
HLA-DQA1_Macrophages	HLA-DQA1	Macrophages	Receptor	0.338182	0.415623	0.447588	-0.819018
HLA-DQB1_Macrophages	HLA-DQB1	Macrophages	Receptor	0.350311	0.440672	0.47721	-0.70497
HLA-DQA2_Macrophages	HLA-DQA2	Macrophages	Receptor	0.126913	0.111734	0.356058	-2.80552
HLA-DPA1_Macrophages	HLA-DPA1	Macrophages	Receptor	0.440497	0.610086	0.855926	0.143026
C6orf1_Macrophages	C6orf1	Macrophages	Ligand	0.0737484	0.142716	-0.49702	-3.30541
TREM2_Macrophages	TREM2	Macrophages	Receptor	0.196221	0.24588	-0.130017	-2.15384
VEGFA_Macrophages	VEGFA	Macrophages	ECM/Ligand	0.112957	0.141068	-0.111512	-2.93675
PLA2G7_Macrophages	PLA2G7	Macrophages	Ligand	0.160491	0.21325	-0.26061	-2.48979
TNFRSF21_Macrophages	TNFRSF21	Macrophages	Receptor	0.128633	0.192485	-0.412426	-2.78935
DST_Macrophages	DST	Macrophages	ECM/Ligand	0.167239	0.219842	-0.241075	-2.42635
SMPDL3A_Macrophages	SMPDL3A	Macrophages	ECM/Ligand	0.123108	0.183586	-0.396097	-2.8413
ENPP1_Macrophages	ENPP1	Macrophages	Receptor	0.0614037	0.0771259	0.2747	-3.42149
CTGF_Macrophages	CTGF	Macrophages	ECM/Ligand	0.270387	0.282136	0.368978	-1.45647
IFNGR1_Macrophages	IFNGR1	Macrophages	Receptor	0.179325	0.244891	-0.283089	-2.3127
IGF2R_Macrophages	IGF2R	Macrophages	Receptor	0.0312673	0.108438	-0.500323	-3.70485
RNASET2_Macrophages	RNASET2	Macrophages	Ligand	0.344089	0.534608	0.139933	-0.763478
THBS2_Macrophages	THBS2	Macrophages	ECM/Ligand	0.00390538	0.0735003	-0.196685	-3.96213
FAM20C_Macrophages	FAM20C	Macrophages	Ligand	0.0722873	0.116348	-0.216075	-3.31915
AHR_Macrophages	AHR	Macrophages	Receptor	0.0960489	0.157877	-0.432934	-3.09573
GPNMB_Macrophages	GPNMB	Macrophages	Receptor	0.362655	0.516809	0.363362	-0.588901
CPVL_Macrophages	CPVL	Macrophages	Ligand	0.259283	0.359921	-0.0867178	-1.56088
SFRP4_Macrophages	SFRP4	Macrophages	Ligand	0.254526	0.301252	0.125251	-1.60561
DBNL_Macrophages	DBNL	Macrophages	Ligand	0.168395	0.245221	-0.387816	-2.41548
FGL2_Macrophages	FGL2	Macrophages	Ligand	0.125948	0.182597	-0.361595	-2.81459
CD36_Macrophages	CD36	Macrophages	Receptor	0.010722	0.0814107	-0.280023	-3.89803
COL1A2_Macrophages	COL1A2	Macrophages	ECM/Ligand	0.570775	0.784113	1.71886	1.368
PILRA_Macrophages	PILRA	Macrophages	Receptor	0.130194	0.198748	-0.443933	-2.77467
PCOLCE_Macrophages	PCOLCE	Macrophages	ECM/Ligand	0.323021	0.510547	0.00826885	-0.961571
NAMPT_Macrophages	NAMPT	Macrophages	Ligand	0.289559	0.404087	0.0309926	-1.2762
TSPAN33_Macrophages	TSPAN33	Macrophages	Receptor	0.0161289	0.102505	-0.561552	-3.84719
CSF2RA_Macrophages	CSF2RA	Macrophages	Receptor	0.106919	0.173039	-0.46299	-2.99352
DHRSX_Macrophages	DHRSX	Macrophages	Ligand	0.00739308	0.0949242	-0.532886	-3.92933
GK_Macrophages	GK	Macrophages	Ligand	0.0299921	0.0945946	-0.31529	-3.71684
ATP6AP2_Macrophages	ATP6AP2	Macrophages	Receptor	0.253106	0.364206	-0.161879	-1.61896
TIMP1_Macrophages	TIMP1	Macrophages	ECM/Ligand	0.486922	0.822347	0.861722	0.579546
IL13RA1_Macrophages	IL13RA1	Macrophages	Receptor	0.122462	0.184904	-0.412495	-2.84737
BGN_Macrophages	BGN	Macrophages	ECM/Ligand	0.175046	0.18029	0.11848	-2.35294
CTSB_Macrophages	CTSB	Macrophages	ECM/Ligand	0.627819	0.977917	1.93657	1.90436
MSR1_Macrophages	MSR1	Macrophages	Receptor	0.269726	0.399143	-0.137742	-1.46269
FGFR1_Macrophages	FGFR1	Macrophages	Receptor	0.267358	0.334871	0.0932852	-1.48495
ADAM9_Macrophages	ADAM9	Macrophages	ECM/Receptor/Ligand	0.129011	0.199407	-0.459834	-2.78579
LY96_Macrophages	LY96	Macrophages	Receptor	0.304969	0.430784	0.0835973	-1.13131
CTHRC1_Macrophages	CTHRC1	Macrophages	ECM/Ligand	0.0407731	0.090969	-0.157501	-3.61547
ENPP2_Macrophages	ENPP2	Macrophages	Receptor	0.125052	0.16414	-0.216283	-2.82302
ST3GAL1_Macrophages	ST3GAL1	Macrophages	Ligand	0.0932769	0.149967	-0.384849	-3.12179
STOML2_Macrophages	STOML2	Macrophages	Ligand	0.0664494	0.132498	-0.458503	-3.37404
TMEM2_Macrophages	TMEM2	Macrophages	Receptor	0.0556605	0.118655	-0.400786	-3.47549
ANXA1_Macrophages	ANXA1	Macrophages	ECM/Ligand	0.43391	0.781477	0.436808	0.0810916
ASPN_Macrophages	ASPN	Macrophages	ECM/Ligand	0.0155047	0.0596572	0.213473	-3.85306
TGFBR1_Macrophages	TGFBR1	Macrophages	Receptor	0.0550662	0.124588	-0.476762	-3.48108
NR4A3_Macrophages	NR4A3	Macrophages	Receptor	0.0557929	0.101516	-0.174482	-3.47424
ABCA1_Macrophages	ABCA1	Macrophages	Receptor	0.235044	0.323995	-0.162947	-1.7888
TNC_Macrophages	TNC	Macrophages	ECM/Ligand	0.158653	0.137772	0.352342	-2.50708
TLR4_Macrophages	TLR4	Macrophages	Receptor	0.0866473	0.146341	-0.411895	-3.18413
GSN_Macrophages	GSN	Macrophages	Ligand	0.372978	0.611404	0.217943	-0.491834
STOM_Macrophages	STOM	Macrophages	Ligand	0.137831	0.211602	-0.462523	-2.70286
ENG_Macrophages	ENG	Macrophages	Receptor	0.182495	0.261701	-0.349056	-2.2829
RXRA_Macrophages	RXRA	Macrophages	Receptor	0.0974151	0.166777	-0.499193	-3.08288
COL5A1_Macrophages	COL5A1	Macrophages	ECM/Ligand	0.170907	0.18029	0.079553	-2.39186
FCN1_Macrophages	FCN1	Macrophages	Receptor/Ligand	0.0635355	0.0735003	0.364214	-3.40144
EGFL7_Macrophages	EGFL7	Macrophages	ECM/Ligand	0.0253223	0.0939354	-0.349127	-3.76075
DPP7_Macrophages	DPP7	Macrophages	ECM/Ligand	0.253597	0.374423	-0.197177	-1.61435
IL2RA_Macrophages	IL2RA	Macrophages	Receptor	0.0364092	0.0995386	-0.328424	-3.6565
ITGB1_Macrophages	ITGB1	Macrophages	ECM/Receptor/Ligand	0.224968	0.292353	-0.109443	-1.88354
NRP1_Macrophages	NRP1	Macrophages	Receptor	0.206337	0.296968	-0.307231	-2.05872
CXCL12_Macrophages	CXCL12	Macrophages	Ligand	0.128066	0.162821	-0.176307	-2.79468
SRGN_Macrophages	SRGN	Macrophages	Ligand	0.484589	0.755768	0.961588	0.557611
PSAP_Macrophages	PSAP	Macrophages	Ligand	0.674342	0.993738	2.35087	2.34181
ANXA7_Macrophages	ANXA7	Macrophages	Ligand	0.133215	0.201384	-0.434537	-2.74627
PLAU_Macrophages	PLAU	Macrophages	Ligand	0.239682	0.314436	-0.0761293	-1.74518
FAM213A_Macrophages	FAM213A	Macrophages	Ligand	0.0461905	0.121951	-0.529385	-3.56453
TSPAN14_Macrophages	TSPAN14	Macrophages	Receptor	0.0689857	0.134806	-0.459552	-3.3502
ENTPD1_Macrophages	ENTPD1	Macrophages	ECM/Ligand	0.0552113	0.127884	-0.513066	-3.47971
SMC3_Macrophages	SMC3	Macrophages	ECM/Ligand	0.0235216	0.101187	-0.473336	-3.77768
HTRA1_Macrophages	HTRA1	Macrophages	ECM/Ligand	0.228776	0.272907	0.025667	-1.84773
PTPRE_Macrophages	PTPRE	Macrophages	Receptor	0.154938	0.211602	-0.301642	-2.54201
CD151_Macrophages	CD151	Macrophages	Ligand	0.168276	0.225115	-0.26552	-2.41659
TSPAN4_Macrophages	TSPAN4	Macrophages	Receptor	0.312291	0.475939	0.00863685	-1.06246
CHID1_Macrophages	CHID1	Macrophages	Receptor	0.106492	0.16381	-0.38794	-2.99754
CTSD_Macrophages	CTSD	Macrophages	ECM/Ligand	0.600332	0.890903	1.81256	1.64591
ADM_Macrophages	ADM	Macrophages	Ligand	0.0944956	0.134806	-0.219627	-3.11033
LYVE1_Macrophages	LYVE1	Macrophages	Receptor	0.0205348	0.0804219	-0.170088	-3.80577
NUCB2_Macrophages	NUCB2	Macrophages	Ligand	0.0787376	0.136783	-0.388842	-3.2585
CD44_Macrophages	CD44	Macrophages	Receptor	0.319053	0.473303	0.0802382	-0.998879
HSD17B12_Macrophages	HSD17B12	Macrophages	ECM/Ligand	0.0812267	0.144364	-0.443248	-3.2351
MDK_Macrophages	MDK	Macrophages	Ligand	0.111283	0.115359	0.162993	-2.95249
NR1H3_Macrophages	NR1H3	Macrophages	Receptor	0.14266	0.194133	-0.292805	-2.65745
SERPING1_Macrophages	SERPING1	Macrophages	ECM/Ligand	0.245101	0.315755	-0.0312115	-1.69423
VEGFB_Macrophages	VEGFB	Macrophages	Ligand	0.00965071	0.095913	-0.526599	-3.90811
LTBP3_Macrophages	LTBP3	Macrophages	ECM/Receptor/Ligand	0.0676298	0.112722	-0.21421	-3.36294
ADRBK1_Macrophages	ADRBK1	Macrophages	Receptor	0.105606	0.17238	-0.469834	-3.00587
AIP_Macrophages	AIP	Macrophages	Receptor	0.0850705	0.152274	-0.484055	-3.19895
TMEM123_Macrophages	TMEM123	Macrophages	Receptor	0.167909	0.243573	-0.382654	-2.42004
MMP13_Macrophages	MMP13	Macrophages	ECM/Ligand	0.215587	0.242914	0.0696047	-1.97174
IL18_Macrophages	IL18	Macrophages	Ligand	0.222069	0.295649	-0.152878	-1.9108
IL10RA_Macrophages	IL10RA	Macrophages	Receptor	0.180111	0.260053	-0.362355	-2.30531
AMICA1_Macrophages	AMICA1	Macrophages	Receptor	0.0150692	0.0781147	-0.179508	-3.85716
THY1_Macrophages	THY1	Macrophages	Receptor	0.0670874	0.107779	-0.154608	-3.36804
CD9_Macrophages	CD9	Macrophages	Receptor	0.189362	0.231048	-0.104758	-2.21833
TNFRSF1A_Macrophages	TNFRSF1A	Macrophages	Receptor	0.223293	0.324984	-0.277844	-1.89929
CD4_Macrophages	CD4	Macrophages	ECM/Receptor/Ligand	0.337796	0.5412	0.0630819	-0.822648
C1S_Macrophages	C1S	Macrophages	Ligand	0.121144	0.138431	-0.0072886	-2.85976
C1R_Macrophages	C1R	Macrophages	Ligand	0.0180137	0.0797627	-0.181929	-3.82947
CD163_Macrophages	CD163	Macrophages	Receptor	0.393994	0.607449	0.424909	-0.294234
C3AR1_Macrophages	C3AR1	Macrophages	Receptor	0.194177	0.271259	-0.290953	-2.17306
M6PR_Macrophages	M6PR	Macrophages	Receptor	0.180128	0.261042	-0.367672	-2.30515
A2M_Macrophages	A2M	Macrophages	Ligand	0.37257	0.572512	0.308923	-0.495673
CLEC2B_Macrophages	CLEC2B	Macrophages	Receptor	0.197188	0.271918	-0.266132	-2.14474
CLEC7A_Macrophages	CLEC7A	Macrophages	Receptor	0.175242	0.248846	-0.344599	-2.3511
ITPR2_Macrophages	ITPR2	Macrophages	Receptor	0.0901184	0.151285	-0.427181	-3.15149
NR4A1_Macrophages	NR4A1	Macrophages	Receptor	0.277748	0.348715	0.132545	-1.38726
NCKAP1L_Macrophages	NCKAP1L	Macrophages	Receptor	0.15057	0.222479	-0.415033	-2.58308
MMP19_Macrophages	MMP19	Macrophages	ECM/Ligand	0.146166	0.181938	-0.166237	-2.62449
LRP1_Macrophages	LRP1	Macrophages	Receptor	0.230187	0.313118	-0.159349	-1.83446
LYZ_Macrophages	LYZ	Macrophages	Ligand	0.413913	0.487475	0.929636	-0.106938
GLIPR1_Macrophages	GLIPR1	Macrophages	Ligand	0.218436	0.309163	-0.25152	-1.94496
LUM_Macrophages	LUM	Macrophages	ECM/Ligand	0.460123	0.701055	0.839957	0.327566
DCN_Macrophages	DCN	Macrophages	ECM/Ligand	0.464667	0.70468	0.875236	0.370287
PLXNC1_Macrophages	PLXNC1	Macrophages	Receptor	0.034565	0.1147	-0.550301	-3.67384
IGF1_Macrophages	IGF1	Macrophages	Ligand	0.193622	0.242914	-0.13695	-2.17828
HSP90B1_Macrophages	HSP90B1	Macrophages	ECM/Ligand	0.378527	0.611734	0.269337	-0.439663
TDG_Macrophages	TDG	Macrophages	Ligand	0.0697189	0.134146	-0.445584	-3.3433
SELPLG_Macrophages	SELPLG	Macrophages	Receptor	0.156713	0.220831	-0.346534	-2.52532
SCARB1_Macrophages	SCARB1	Macrophages	Receptor	0.0393094	0.117007	-0.534405	-3.62923
HMGB1_Macrophages	HMGB1	Macrophages	Ligand	0.441355	0.823995	0.43038	0.151094
NHLRC3_Macrophages	NHLRC3	Macrophages	Ligand	0.0374107	0.112722	-0.498443	-3.64709
LPAR6_Macrophages	LPAR6	Macrophages	Receptor	0.185944	0.25445	-0.276085	-2.25047
GPR183_Macrophages	GPR183	Macrophages	Receptor	0.296659	0.369809	0.225635	-1.20945
TNFSF13B_Macrophages	TNFSF13B	Macrophages	Ligand	0.167893	0.238629	-0.353221	-2.42019
RNASE6_Macrophages	RNASE6	Macrophages	Ligand	0.241951	0.323006	-0.0935879	-1.72385
RNASE1_Macrophages	RNASE1	Macrophages	Ligand	0.613034	0.858273	1.98583	1.76534
MMP14_Macrophages	MMP14	Macrophages	ECM/Ligand	0.248895	0.325972	-0.0414725	-1.65855
DHRS4L2_Macrophages	DHRS4L2	Macrophages	Ligand	0.0619849	0.132828	-0.504077	-3.41602
LGALS3_Macrophages	LGALS3	Macrophages	ECM/Ligand	0.392158	0.653263	0.302748	-0.311496
NPC2_Macrophages	NPC2	Macrophages	Ligand	0.580692	0.978247	1.49297	1.46124
LTBP2_Macrophages	LTBP2	Macrophages	ECM/Receptor/Ligand	0.0300456	0.101516	-0.416662	-3.71634
IFI27_Macrophages	IFI27	Macrophages	Receptor	0.218443	0.220501	0.236119	-1.94489
IFI27L2_Macrophages	IFI27L2	Macrophages	Receptor	0.266988	0.384641	-0.110098	-1.48844
SERPINA1_Macrophages	SERPINA1	Macrophages	ECM/Ligand	0.0752721	0.13085	-0.357466	-3.29109
HSP90AA1_Macrophages	HSP90AA1	Macrophages	ECM/Ligand	0.571253	0.943639	1.45618	1.37249
B2M_Macrophages	B2M	Macrophages	Ligand	0.72275	0.99967	2.79745	2.79698
ADAM10_Macrophages	ADAM10	Macrophages	ECM/Ligand	0.0307913	0.110745	-0.535173	-3.70933
ANXA2_Macrophages	ANXA2	Macrophages	ECM/Receptor/Ligand	0.500425	0.943968	0.7897	0.706512
PKM_Macrophages	PKM	Macrophages	ECM/Ligand	0.421602	0.82004	0.251585	-0.0346408
NPTN_Macrophages	NPTN	Macrophages	Receptor/Ligand	0.0198383	0.106131	-0.576802	-3.81231
CD276_Macrophages	CD276	Macrophages	Ligand	0.0428331	0.107779	-0.382737	-3.5961
ISLR_Macrophages	ISLR	Macrophages	Ligand	0.0777502	0.100527	0.0461576	-3.26778
ANPEP_Macrophages	ANPEP	Macrophages	Receptor	0.0608649	0.108767	-0.22631	-3.42655
METRN_Macrophages	METRN	Macrophages	Ligand	8.43121e-05	0.0840475	-0.426076	-3.99806
GNPTG_Macrophages	GNPTG	Macrophages	Ligand	0.0388399	0.1147	-0.51009	-3.63365
NME3_Macrophages	NME3	Macrophages	Ligand	0.148153	0.207647	-0.338231	-2.60581
TNFRSF12A_Macrophages	TNFRSF12A	Macrophages	Receptor	0.052843	0.104483	-0.24378	-3.50198
IL32_Macrophages	IL32	Macrophages	Ligand	0.0994497	0.128214	-0.100706	-3.06375
IGSF6_Macrophages	IGSF6	Macrophages	Receptor	0.344957	0.439024	0.432272	-0.755312
IL4R_Macrophages	IL4R	Macrophages	Receptor	0.0299463	0.107119	-0.495102	-3.71727
TMEM219_Macrophages	TMEM219	Macrophages	Receptor	0.258994	0.395847	-0.226694	-1.5636
ALDOA_Macrophages	ALDOA	Macrophages	Ligand	0.397185	0.730059	0.189673	-0.264226
ITGAM_Macrophages	ITGAM	Macrophages	Receptor	0.146033	0.218194	-0.429642	-2.62574
ITGAX_Macrophages	ITGAX	Macrophages	Receptor	0.15732	0.214239	-0.297108	-2.51961
MMP2_Macrophages	MMP2	Macrophages	ECM/Ligand	0.14858	0.157548	0.0641154	-2.60179
CKLF_Macrophages	CKLF	Macrophages	Ligand	0.182836	0.241266	-0.228557	-2.27969
CMTM3_Macrophages	CMTM3	Macrophages	Ligand	0.15914	0.223797	-0.342967	-2.5025
VAC14_Macrophages	VAC14	Macrophages	Receptor	0.0243109	0.105142	-0.521228	-3.77026
GLG1_Macrophages	GLG1	Macrophages	ECM/Ligand	0.0689055	0.132498	-0.435402	-3.35095
GLOD4_Macrophages	GLOD4	Macrophages	Ligand	0.0353229	0.110086	-0.483934	-3.66672
SERPINF1_Macrophages	SERPINF1	Macrophages	ECM/Ligand	0.411863	0.699736	0.388894	-0.126208
ITGAE_Macrophages	ITGAE	Macrophages	Receptor	0.00405201	0.0945946	-0.559297	-3.96075
CXCL16_Macrophages	CXCL16	Macrophages	Ligand	0.189793	0.271589	-0.333925	-2.21427
C1QBP_Macrophages	C1QBP	Macrophages	Ligand	0.16626	0.231048	-0.322011	-2.43556
TNFSF12_Macrophages	TNFSF12	Macrophages	Ligand	0.0662768	0.136454	-0.502559	-3.37567
EVI2A_Macrophages	EVI2A	Macrophages	Receptor	0.109523	0.167106	-0.38817	-2.96903
CCL2_Macrophages	CCL2	Macrophages	Ligand	0.328575	0.285761	0.897706	-0.90935
CCL8_Macrophages	CCL8	Macrophages	Ligand	0.0745474	0.0827291	0.297148	-3.2979
CCL13_Macrophages	CCL13	Macrophages	Ligand	0.10707	0.12261	0.0354273	-2.9921
CCL5_Macrophages	CCL5	Macrophages	Ligand	0.176031	0.158207	0.316244	-2.34368
CCL18_Macrophages	CCL18	Macrophages	Ligand	0.384852	0.323995	1.24573	-0.380187
CCL3_Macrophages	CCL3	Macrophages	Ligand	0.575769	0.69677	1.93619	1.41495
CCL4_Macrophages	CCL4	Macrophages	Ligand	0.494019	0.536256	1.54527	0.646275
IGFBP4_Macrophages	IGFBP4	Macrophages	Ligand	0.163623	0.204351	-0.169669	-2.46035
GRN_Macrophages	GRN	Macrophages	Ligand	0.45812	0.782136	0.663229	0.308728
ABI3_Macrophages	ABI3	Macrophages	ECM/Ligand	0.0725993	0.133487	-0.411386	-3.31622
COL1A1_Macrophages	COL1A1	Macrophages	ECM/Ligand	0.596687	0.783454	1.96372	1.61164
MMD_Macrophages	MMD	Macrophages	Receptor	0.0543772	0.128873	-0.532022	-3.48755
TIMP2_Macrophages	TIMP2	Macrophages	ECM/Ligand	0.315322	0.477917	0.031158	-1.03396
LGALS3BP_Macrophages	LGALS3BP	Macrophages	ECM/Receptor/Ligand	0.107515	0.152274	-0.272963	-2.98791
P4HB_Macrophages	P4HB	Macrophages	Receptor	0.299176	0.452208	-0.0408904	-1.18577
COLEC12_Macrophages	COLEC12	Macrophages	Receptor	0.175401	0.241266	-0.298473	-2.3496
EMILIN2_Macrophages	EMILIN2	Macrophages	ECM/Ligand	0.108497	0.178312	-0.491461	-2.97868
THBD_Macrophages	THBD	Macrophages	Receptor	0.160625	0.181608	-0.0276498	-2.48854
CD93_Macrophages	CD93	Macrophages	Receptor	0.124316	0.16381	-0.220308	-2.82994
CST3_Macrophages	CST3	Macrophages	ECM/Ligand	0.653699	0.997034	2.15199	2.1477
WISP2_Macrophages	WISP2	Macrophages	ECM/Ligand	0.020241	0.0781147	-0.130859	-3.80853
PLTP_Macrophages	PLTP	Macrophages	ECM/Ligand	0.449443	0.612393	0.934594	0.227138
MMP9_Macrophages	MMP9	Macrophages	ECM/Ligand	0.492161	0.772907	1.00043	0.628807
OGFR_Macrophages	OGFR	Macrophages	Receptor	0.0672697	0.137113	-0.500173	-3.36633
BSG_Macrophages	BSG	Macrophages	Receptor	0.240001	0.338497	-0.179497	-1.74218
CFD_Macrophages	CFD	Macrophages	Ligand	0.354766	0.500989	0.334034	-0.663079
C19orf10_Macrophages	C19orf10	Macrophages	Ligand	0.291557	0.435399	-0.0578887	-1.25742
MCOLN1_Macrophages	MCOLN1	Macrophages	Receptor	0.195647	0.276862	-0.306624	-2.15924
HNRNPM_Macrophages	HNRNPM	Macrophages	ECM/Ligand	0.188688	0.261371	-0.288996	-2.22467
ICAM1_Macrophages	ICAM1	Macrophages	Ligand	0.278307	0.362228	0.0829544	-1.382
DNASE2_Macrophages	DNASE2	Macrophages	Ligand	0.133975	0.195452	-0.384252	-2.73912
GPI_Macrophages	GPI	Macrophages	Ligand	0.0300343	0.110415	-0.537993	-3.71644
HCST_Macrophages	HCST	Macrophages	Receptor	0.265611	0.343441	0.0403997	-1.50138
TYROBP_Macrophages	TYROBP	Macrophages	Ligand	0.602355	0.907053	1.80567	1.66493
TGFB1_Macrophages	TGFB1	Macrophages	ECM/Ligand	0.166064	0.230389	-0.319733	-2.4374
PLAUR_Macrophages	PLAUR	Macrophages	Receptor	0.346461	0.475939	0.329936	-0.741174
PVRL2_Macrophages	PVRL2	Macrophages	Receptor	0.11828	0.179301	-0.407428	-2.88669
APOE_Macrophages	APOE	Macrophages	ECM/Ligand	0.747461	0.981213	3.05669	3.02932
APOC1_Macrophages	APOC1	Macrophages	Ligand	0.598026	0.80323	1.94034	1.62423
C5AR1_Macrophages	C5AR1	Macrophages	Receptor	0.223242	0.317732	-0.245761	-1.89976
FCGRT_Macrophages	FCGRT	Macrophages	Receptor	0.491507	0.797956	0.948268	0.622656
IL4I1_Macrophages	IL4I1	Macrophages	Ligand	0.0437341	0.099209	-0.254741	-3.58763
NR1H2_Macrophages	NR1H2	Macrophages	Receptor	0.0231373	0.102835	-0.500258	-3.78129
CLEC11A_Macrophages	CLEC11A	Macrophages	Ligand	0.295604	0.451879	-0.0734292	-1.21936
SIGLEC7_Macrophages	SIGLEC7	Macrophages	Receptor	0.00492953	0.0982202	-0.605302	-3.9525
CD33_Macrophages	CD33	Macrophages	Receptor	0.0532145	0.127884	-0.531847	-3.49849
FPR1_Macrophages	FPR1	Macrophages	Receptor	0.0547067	0.125577	-0.491547	-3.48446
FPR3_Macrophages	FPR3	Macrophages	Receptor	0.290993	0.433092	-0.0555303	-1.26272
LILRB5_Macrophages	LILRB5	Macrophages	Receptor	0.148865	0.21292	-0.36772	-2.59912
LILRB2_Macrophages	LILRB2	Macrophages	Receptor	0.119058	0.183916	-0.436766	-2.87938
LAIR1_Macrophages	LAIR1	Macrophages	Receptor	0.201391	0.301252	-0.374404	-2.10522
LILRB1_Macrophages	LILRB1	Macrophages	Receptor	0.0622293	0.133817	-0.512477	-3.41372
LILRB4_Macrophages	LILRB4	Macrophages	Receptor	0.215496	0.298616	-0.229085	-1.9726
A1BG_Macrophages	A1BG	Macrophages	Ligand	0.105669	0.169084	-0.441388	-3.00527
MIF_Macrophages	MIF	Macrophages	Ligand	0.281013	0.394199	-0.0136243	-1.35656
OSM_Macrophages	OSM	Macrophages	Ligand	0.0500977	0.102505	-0.242034	-3.52779
TCN2_Macrophages	TCN2	Macrophages	Receptor	0.0710617	0.13942	-0.488581	-3.33068
TIMP3_Macrophages	TIMP3	Macrophages	ECM/Ligand	0.336933	0.503955	0.157828	-0.830764
LGALS1_Macrophages	LGALS1	Macrophages	ECM/Ligand	0.66903	0.995386	2.29853	2.29186
FBLN1_Macrophages	FBLN1	Macrophages	ECM/Receptor/Ligand	0.071148	0.0847067	0.231095	-3.32986
CRELD2_Macrophages	CRELD2	Macrophages	ECM/Ligand	0.0537783	0.121622	-0.454112	-3.49319
PLXNB2_Macrophages	PLXNB2	Macrophages	Receptor	0.1386	0.198418	-0.362479	-2.69563
APP_Macrophages	APP	Macrophages	Receptor/Ligand	0.137436	0.192156	-0.327163	-2.70657
SOD1_Macrophages	SOD1	Macrophages	ECM/Ligand	0.286787	0.42584	-0.070722	-1.30227
IL10RB_Macrophages	IL10RB	Macrophages	Receptor	0.0650013	0.134806	-0.497027	-3.38766
IFNAR1_Macrophages	IFNAR1	Macrophages	Receptor	0.109088	0.17205	-0.434321	-2.97312
IFNGR2_Macrophages	IFNGR2	Macrophages	Receptor	0.191601	0.269281	-0.304615	-2.19727
RUNX1_Macrophages	RUNX1	Macrophages	ECM/Ligand	0.101001	0.157877	-0.386358	-3.04916
ITGB2_Macrophages	ITGB2	Macrophages	Receptor	0.333716	0.519446	0.0839099	-0.861004
COL6A1_Macrophages	COL6A1	Macrophages	ECM/Ligand	0.390857	0.586684	0.445595	-0.323725
COL6A2_Macrophages	COL6A2	Macrophages	ECM/Ligand	0.395755	0.595913	0.469136	-0.277668
CCL3L1_Macrophages	CCL3L1	Macrophages	Ligand	0.177416	0.168095	0.241804	-2.33066
SDF4_Monocytes	SDF4	Monocytes	Ligand	0.12916	0.213992	-0.568425	-2.79255
TNFRSF14_Monocytes	TNFRSF14	Monocytes	Receptor	0.0681654	0.148148	-0.608267	-3.36275
AGTRAP_Monocytes	AGTRAP	Monocytes	Receptor	0.123375	0.197531	-0.50704	-2.84662
TNFRSF1B_Monocytes	TNFRSF1B	Monocytes	Receptor	0.158168	0.251029	-0.527487	-2.52136
C1QA_Monocytes	C1QA	Monocytes	Ligand	0.380083	0.35097	1.06374	-0.4468
C1QC_Monocytes	C1QC	Monocytes	Ligand	0.314998	0.255144	0.9153	-1.05524
C1QB_Monocytes	C1QB	Monocytes	Ligand	0.272745	0.223986	0.708171	-1.45025
PTAFR_Monocytes	PTAFR	Monocytes	Receptor	0.158273	0.247501	-0.506095	-2.52039
CSF3R_Monocytes	CSF3R	Monocytes	Receptor	0.150738	0.231041	-0.47726	-2.59083
PPT1_Monocytes	PPT1	Monocytes	ECM/Ligand	0.344083	0.610817	-0.0721923	-0.783349
TM2D1_Monocytes	TM2D1	Monocytes	Receptor	0.0252479	0.112287	-0.60978	-3.76397
CD58_Monocytes	CD58	Monocytes	Receptor	0.16937	0.25338	-0.436208	-2.41665
CD2_Monocytes	CD2	Monocytes	Receptor	0.0177429	0.0970018	-0.468871	-3.83413
NOTCH2_Monocytes	NOTCH2	Monocytes	Receptor	0.0129696	0.102293	-0.59013	-3.87875
FCGR1A_Monocytes	FCGR1A	Monocytes	Receptor	0.126299	0.167549	-0.242218	-2.8193
S100A9_Monocytes	S100A9	Monocytes	Ligand	0.450887	0.38448	1.5941	0.215105
S100A12_Monocytes	S100A12	Monocytes	Ligand	0.126942	0.11699	0.281978	-2.81328
S100A8_Monocytes	S100A8	Monocytes	Ligand	0.444461	0.295708	1.91275	0.155029
S100A4_Monocytes	S100A4	Monocytes	Ligand	0.658733	0.952381	2.22853	2.15814
SLC39A1_Monocytes	SLC39A1	Monocytes	Receptor	0.0660759	0.142269	-0.569393	-3.38229
IL6R_Monocytes	IL6R	Monocytes	Receptor	0.0518785	0.132863	-0.603477	-3.51501
ADAM15_Monocytes	ADAM15	Monocytes	ECM/Ligand	0.0397043	0.121105	-0.583652	-3.62882
SEMA4A_Monocytes	SEMA4A	Monocytes	Receptor	0.151383	0.242798	-0.542831	-2.58479
APOA1BP_Monocytes	APOA1BP	Monocytes	Ligand	0.11435	0.195179	-0.574153	-2.931
HDGF_Monocytes	HDGF	Monocytes	Ligand	0.154165	0.242798	-0.51682	-2.55879
CD1D_Monocytes	CD1D	Monocytes	Receptor	0.039866	0.121693	-0.589125	-3.62731
FCER1A_Monocytes	FCER1A	Monocytes	Receptor	0.48866	0.452087	1.71354	0.568227
CD84_Monocytes	CD84	Monocytes	Receptor	0.101868	0.171076	-0.500709	-3.04769
CD48_Monocytes	CD48	Monocytes	Receptor	0.232093	0.36214	-0.365006	-1.83028
FCER1G_Monocytes	FCER1G	Monocytes	Receptor	0.547463	0.890653	1.285	1.11794
FCGR2A_Monocytes	FCGR2A	Monocytes	Receptor	0.259207	0.386243	-0.204479	-1.57681
FCGR3A_Monocytes	FCGR3A	Monocytes	Receptor	0.156803	0.175779	-0.0261823	-2.53413
FCGR2B_Monocytes	FCGR2B	Monocytes	Receptor	0.314075	0.404468	0.241968	-1.06388
CREG1_Monocytes	CREG1	Monocytes	Ligand	0.12153	0.20047	-0.5456	-2.86387
TPR_Monocytes	TPR	Monocytes	Receptor	0.172247	0.262199	-0.458658	-2.38975
PTPRC_Monocytes	PTPRC	Monocytes	Receptor	0.295599	0.510288	-0.266039	-1.2366
RNPEP_Monocytes	RNPEP	Monocytes	Ligand	0.136625	0.228689	-0.594453	-2.72276
ADIPOR1_Monocytes	ADIPOR1	Monocytes	Receptor	0.100718	0.181658	-0.598044	-3.05844
IL10_Monocytes	IL10	Monocytes	Ligand	0.0759803	0.0999412	0.0326773	-3.2897
CD55_Monocytes	CD55	Monocytes	Receptor	0.103183	0.169312	-0.47346	-3.03539
NENF_Monocytes	NENF	Monocytes	Ligand	0.19858	0.300999	-0.411555	-2.14358
HPCAL1_Monocytes	HPCAL1	Monocytes	ECM/Ligand	0.070907	0.146972	-0.571135	-3.33712
POMC_Monocytes	POMC	Monocytes	Ligand	0.055909	0.137566	-0.615969	-3.47733
QPCT_Monocytes	QPCT	Monocytes	Ligand	0.127804	0.20047	-0.486941	-2.80522
MGAT4A_Monocytes	MGAT4A	Monocytes	Ligand	0.0478808	0.131687	-0.628037	-3.55238
IL1R2_Monocytes	IL1R2	Monocytes	Receptor	0.211578	0.252205	-0.0348731	-2.02207
SLC20A1_Monocytes	SLC20A1	Monocytes	Receptor	0.00219359	0.095826	-0.596702	-3.97949
IL1B_Monocytes	IL1B	Monocytes	Ligand	0.403985	0.469724	0.866734	-0.223353
IL1RN_Monocytes	IL1RN	Monocytes	Ligand	0.238748	0.266902	0.137436	-1.76807
MARCO_Monocytes	MARCO	Monocytes	Receptor	0.139362	0.166961	-0.115	-2.69717
CXCR4_Monocytes	CXCR4	Monocytes	Receptor	0.308534	0.43739	0.0772714	-1.11568
NR4A2_Monocytes	NR4A2	Monocytes	Receptor	0.345508	0.552028	0.0871238	-0.770027
ITGAV_Monocytes	ITGAV	Monocytes	ECM/Receptor/Ligand	0.000243839	0.090535	-0.533	-3.99771
COL3A1_Monocytes	COL3A1	Monocytes	ECM/Ligand	0.372442	0.359788	0.956498	-0.518239
COL5A2_Monocytes	COL5A2	Monocytes	ECM/Ligand	0.124615	0.145797	-0.057346	-2.83504
SLC40A1_Monocytes	SLC40A1	Monocytes	Receptor	0.0466475	0.0999412	-0.241624	-3.56391
NRP2_Monocytes	NRP2	Monocytes	Receptor	0.148314	0.182246	-0.157677	-2.61349
FN1_Monocytes	FN1	Monocytes	ECM/Ligand	0.402784	0.440329	0.948728	-0.234588
IGFBP2_Monocytes	IGFBP2	Monocytes	Ligand	0.099984	0.101117	0.24026	-3.0653
SERPINE2_Monocytes	SERPINE2	Monocytes	ECM/Ligand	0.00629442	0.0658436	-0.0169967	-3.94115
CCL20_Monocytes	CCL20	Monocytes	Ligand	0.0829112	0.0676073	0.661375	-3.2249
COL6A3_Monocytes	COL6A3	Monocytes	ECM/Ligand	0.0814583	0.106408	-0.00654989	-3.23848
CMTM7_Monocytes	CMTM7	Monocytes	Receptor	0.177685	0.292181	-0.564014	-2.33891
CMTM6_Monocytes	CMTM6	Monocytes	Ligand	0.245809	0.403292	-0.392049	-1.70206
GLB1_Monocytes	GLB1	Monocytes	Ligand	0.0546574	0.13639	-0.61529	-3.48903
CRTAP_Monocytes	CRTAP	Monocytes	ECM/Ligand	0.0973522	0.177543	-0.596459	-3.0899
RPSA_Monocytes	RPSA	Monocytes	Receptor	0.498694	0.914168	0.79149	0.662024
CCR1_Monocytes	CCR1	Monocytes	Receptor	0.0312271	0.114051	-0.576345	-3.70807
MANF_Monocytes	MANF	Monocytes	Ligand	0.19812	0.279835	-0.31067	-2.14787
STAB1_Monocytes	STAB1	Monocytes	Receptor	0.126159	0.186361	-0.397039	-2.8206
ALCAM_Monocytes	ALCAM	Monocytes	Receptor	0.104161	0.175779	-0.518392	-3.02625
CD47_Monocytes	CD47	Monocytes	Receptor	0.177479	0.273956	-0.473028	-2.34084
CCDC80_Monocytes	CCDC80	Monocytes	ECM/Ligand	0.0201345	0.0858319	-0.270013	-3.81177
CD86_Monocytes	CD86	Monocytes	Receptor	0.231534	0.356849	-0.348998	-1.83551
TPRA1_Monocytes	TPRA1	Monocytes	Receptor	0.00856064	0.104056	-0.656026	-3.91997
PLXND1_Monocytes	PLXND1	Monocytes	Receptor	0.0826481	0.157554	-0.561645	-3.22736
PLSCR1_Monocytes	PLSCR1	Monocytes	ECM/Ligand	0.215726	0.33157	-0.390791	-1.98329
TNFSF10_Monocytes	TNFSF10	Monocytes	Ligand	0.0641918	0.124633	-0.396076	-3.3999
C4orf48_Monocytes	C4orf48	Monocytes	Ligand	0.305067	0.505585	-0.16416	-1.14808
LRPAP1_Monocytes	LRPAP1	Monocytes	Receptor	0.182029	0.296296	-0.543571	-2.2983
BST1_Monocytes	BST1	Monocytes	Receptor	0.0420287	0.124045	-0.596512	-3.60709
IGFBP7_Monocytes	IGFBP7	Monocytes	ECM/Ligand	0.147578	0.210464	-0.372239	-2.62037
IL8_Monocytes	IL8	Monocytes	Ligand	0.422538	0.492651	0.971421	-0.0499157
CXCL3_Monocytes	CXCL3	Monocytes	Ligand	0.395236	0.338624	1.25706	-0.305146
CXCL2_Monocytes	CXCL2	Monocytes	Ligand	0.377103	0.397413	0.856586	-0.474663
EREG_Monocytes	EREG	Monocytes	Ligand	0.261748	0.248089	0.457915	-1.55305
AREG_Monocytes	AREG	Monocytes	Ligand	0.058598	0.0887713	0.0411124	-3.45219
CXCL10_Monocytes	CXCL10	Monocytes	Ligand	0.0521209	0.0293945	1.57506	-3.51274
HSD17B11_Monocytes	HSD17B11	Monocytes	Ligand	0.146417	0.227513	-0.495465	-2.63122
IBSP_Monocytes	IBSP	Monocytes	Ligand	0.313276	0.298648	0.672067	-1.07135
SPP1_Monocytes	SPP1	Monocytes	ECM/Ligand	0.337372	0.355085	0.647625	-0.846084
SNCA_Monocytes	SNCA	Monocytes	ECM/Ligand	0.107186	0.187537	-0.583514	-2.99797
AIMP1_Monocytes	AIMP1	Monocytes	Ligand	0.163915	0.254556	-0.493891	-2.46765
ANXA5_Monocytes	ANXA5	Monocytes	Ligand	0.367251	0.671958	0.00676908	-0.566766
TLR2_Monocytes	TLR2	Monocytes	Receptor	0.0584457	0.136978	-0.586069	-3.45362
HMGB2_Monocytes	HMGB2	Monocytes	Ligand	0.284055	0.332158	0.245469	-1.34451
IL7R_Monocytes	IL7R	Monocytes	Receptor	0.247223	0.260435	0.252057	-1.68884
PTGER4_Monocytes	PTGER4	Monocytes	Receptor	0.100397	0.1699	-0.504517	-3.06144
VCAN_Monocytes	VCAN	Monocytes	ECM/Ligand	0.241615	0.257496	0.216002	-1.74126
SNX2_Monocytes	SNX2	Monocytes	Ligand	0.206459	0.332158	-0.479989	-2.06992
CXCL14_Monocytes	CXCL14	Monocytes	Ligand	0.0084617	0.0417402	0.660864	-3.92089
TGFBI_Monocytes	TGFBI	Monocytes	ECM/Ligand	0.370893	0.543798	0.346111	-0.532716
SIL1_Monocytes	SIL1	Monocytes	Ligand	0.052082	0.133451	-0.607943	-3.51311
HBEGF_Monocytes	HBEGF	Monocytes	Ligand	0.093819	0.134039	-0.223999	-3.12293
CD14_Monocytes	CD14	Monocytes	Receptor	0.415925	0.531452	0.800233	-0.111732
NR3C1_Monocytes	NR3C1	Monocytes	Receptor	0.0844783	0.16167	-0.581728	-3.21025
CSF1R_Monocytes	CSF1R	Monocytes	Receptor	0.266496	0.419165	-0.254337	-1.50867
CD74_Monocytes	CD74	Monocytes	Receptor	0.856223	0.998824	4.00607	4.00437
GPX3_Monocytes	GPX3	Monocytes	Ligand	0.0879243	0.162257	-0.554742	-3.17804
SPARC_Monocytes	SPARC	Monocytes	ECM/Ligand	0.347874	0.365079	0.70576	-0.747909
HRH2_Monocytes	HRH2	Monocytes	Receptor	0.0344325	0.121105	-0.632953	-3.6781
LY86_Monocytes	LY86	Monocytes	Ligand	0.284054	0.482657	-0.293663	-1.34453
HLA-F_Monocytes	HLA-F	Monocytes	Receptor	0.134508	0.218107	-0.545903	-2.74256
HLA-A_Monocytes	HLA-A	Monocytes	Receptor	0.50908	0.900059	0.911028	0.759122
HLA-E_Monocytes	HLA-E	Monocytes	Receptor	0.377947	0.687243	0.0743129	-0.466775
HLA-C_Monocytes	HLA-C	Monocytes	Receptor	0.470714	0.882422	0.58091	0.400454
HLA-B_Monocytes	HLA-B	Monocytes	Receptor	0.571253	0.981775	1.36687	1.34034
TNF_Monocytes	TNF	Monocytes	Ligand	0.00262598	0.0817166	-0.362881	-3.97544
LTB_Monocytes	LTB	Monocytes	Ligand	0.0753059	0.13639	-0.422202	-3.296
HLA-DRA_Monocytes	HLA-DRA	Monocytes	Receptor	0.787028	0.990594	3.37114	3.3575
HLA-DRB1_Monocytes	HLA-DRB1	Monocytes	Receptor	0.704587	0.986479	2.60645	2.58681
HLA-DQA1_Monocytes	HLA-DQA1	Monocytes	Receptor	0.588195	0.855967	1.7231	1.49872
HLA-DQB1_Monocytes	HLA-DQB1	Monocytes	Receptor	0.641826	0.908877	2.13793	2.00009
HLA-DQA2_Monocytes	HLA-DQA2	Monocytes	Receptor	0.32834	0.390947	0.424386	-0.930517
HLA-DQB2_Monocytes	HLA-DQB2	Monocytes	Receptor	0.0584543	0.0940623	-0.043752	-3.45354
HLA-DOB_Monocytes	HLA-DOB	Monocytes	Receptor	0.0111073	0.0870076	-0.374068	-3.89616
HLA-DOA_Monocytes	HLA-DOA	Monocytes	Receptor	0.123697	0.211052	-0.599554	-2.84362
HLA-DPA1_Monocytes	HLA-DPA1	Monocytes	Receptor	0.692937	0.924162	2.59168	2.4779
C6orf1_Monocytes	C6orf1	Monocytes	Ligand	0.0842933	0.166961	-0.629915	-3.21198
TREM2_Monocytes	TREM2	Monocytes	Receptor	0.0865999	0.134039	-0.291504	-3.19042
TREM1_Monocytes	TREM1	Monocytes	Receptor	0.148937	0.20341	-0.310342	-2.60766
VEGFA_Monocytes	VEGFA	Monocytes	ECM/Ligand	0.0979755	0.162257	-0.460757	-3.08407
PLA2G7_Monocytes	PLA2G7	Monocytes	Ligand	0.0503567	0.114051	-0.397451	-3.52924
CTGF_Monocytes	CTGF	Monocytes	ECM/Ligand	0.139227	0.140506	0.132612	-2.69843
IFNGR1_Monocytes	IFNGR1	Monocytes	Receptor	0.287451	0.437978	-0.121761	-1.31277
RNASET2_Monocytes	RNASET2	Monocytes	Ligand	0.375769	0.661964	0.108018	-0.487136
AHR_Monocytes	AHR	Monocytes	Receptor	0.141448	0.223398	-0.515591	-2.67767
GPNMB_Monocytes	GPNMB	Monocytes	Receptor	0.072348	0.107584	-0.107594	-3.32365
CPVL_Monocytes	CPVL	Monocytes	Ligand	0.431099	0.646091	0.660295	0.0301189
SFRP4_Monocytes	SFRP4	Monocytes	Ligand	0.11699	0.129924	0.0376434	-2.90632
DBNL_Monocytes	DBNL	Monocytes	Ligand	0.257505	0.433862	-0.388105	-1.59272
FGL2_Monocytes	FGL2	Monocytes	Ligand	0.291187	0.465021	-0.173273	-1.27785
CD36_Monocytes	CD36	Monocytes	Receptor	0.0532869	0.119342	-0.43547	-3.50184
COL1A2_Monocytes	COL1A2	Monocytes	ECM/Ligand	0.464075	0.492063	1.36145	0.338387
PILRA_Monocytes	PILRA	Monocytes	Receptor	0.173952	0.27572	-0.515259	-2.37381
PCOLCE_Monocytes	PCOLCE	Monocytes	ECM/Ligand	0.183015	0.210464	-0.0409072	-2.28908
NAMPT_Monocytes	NAMPT	Monocytes	Ligand	0.302742	0.462081	-0.0560921	-1.16982
DNAJB9_Monocytes	DNAJB9	Monocytes	Ligand	0.0212825	0.106408	-0.569285	-3.80104
TSPAN33_Monocytes	TSPAN33	Monocytes	Receptor	0.188031	0.298648	-0.49886	-2.24219
CLEC5A_Monocytes	CLEC5A	Monocytes	Receptor	0.153054	0.216343	-0.360785	-2.56918
CSF2RA_Monocytes	CSF2RA	Monocytes	Receptor	0.254131	0.392122	-0.273725	-1.62426
DHRSX_Monocytes	DHRSX	Monocytes	Ligand	0.0206534	0.112287	-0.652748	-3.80692
GK_Monocytes	GK	Monocytes	Ligand	0.103542	0.165197	-0.434613	-3.03204
ATP6AP2_Monocytes	ATP6AP2	Monocytes	Receptor	0.242414	0.374486	-0.316875	-1.7338
TIMP1_Monocytes	TIMP1	Monocytes	ECM/Ligand	0.484695	0.6796	1.08838	0.531153
CFP_Monocytes	CFP	Monocytes	ECM/Ligand	0.230981	0.318048	-0.188109	-1.84068
EBP_Monocytes	EBP	Monocytes	Receptor	0.0394705	0.125808	-0.640802	-3.63101
IL2RG_Monocytes	IL2RG	Monocytes	Receptor	0.215333	0.333921	-0.40466	-1.98696
IL13RA1_Monocytes	IL13RA1	Monocytes	Receptor	0.202395	0.320988	-0.468633	-2.10791
BGN_Monocytes	BGN	Monocytes	ECM/Ligand	0.0318445	0.0870076	-0.180128	-3.7023
MSRA_Monocytes	MSRA	Monocytes	Ligand	0.0888813	0.175191	-0.656433	-3.16909
CTSB_Monocytes	CTSB	Monocytes	ECM/Ligand	0.413909	0.661964	0.464579	-0.130581
MSR1_Monocytes	MSR1	Monocytes	Receptor	0.0504146	0.116402	-0.426353	-3.5287
FGFR1_Monocytes	FGFR1	Monocytes	Receptor	0.0962827	0.131687	-0.175428	-3.0999
ADAM9_Monocytes	ADAM9	Monocytes	ECM/Receptor/Ligand	0.0177424	0.108172	-0.626108	-3.83413
LY96_Monocytes	LY96	Monocytes	Receptor	0.254576	0.400353	-0.299531	-1.6201
SLC52A2_Monocytes	SLC52A2	Monocytes	Receptor	0.0283076	0.115226	-0.618445	-3.73536
STOML2_Monocytes	STOML2	Monocytes	Ligand	0.152763	0.239859	-0.51236	-2.57189
ANXA1_Monocytes	ANXA1	Monocytes	ECM/Ligand	0.499657	0.854791	0.897382	0.671031
NR4A3_Monocytes	NR4A3	Monocytes	Receptor	0.109546	0.165785	-0.383597	-2.97591
TNC_Monocytes	TNC	Monocytes	ECM/Ligand	0.0401459	0.0823045	-0.0223269	-3.62469
GSN_Monocytes	GSN	Monocytes	Ligand	0.426318	0.707231	0.485154	-0.0145785
STOM_Monocytes	STOM	Monocytes	Ligand	0.0205364	0.111699	-0.64627	-3.80801
PTGS1_Monocytes	PTGS1	Monocytes	Ligand	0.031137	0.119929	-0.649697	-3.70891
ENG_Monocytes	ENG	Monocytes	Receptor	0.118791	0.186949	-0.470478	-2.88949
RXRA_Monocytes	RXRA	Monocytes	Receptor	0.0222924	0.110523	-0.614581	-3.79159
COL5A1_Monocytes	COL5A1	Monocytes	ECM/Ligand	0.0418176	0.0881834	-0.106225	-3.60906
FCN1_Monocytes	FCN1	Monocytes	Receptor/Ligand	0.494876	0.71017	1.12009	0.626331
OLFM1_Monocytes	OLFM1	Monocytes	Receptor/Ligand	0.01666	0.0840682	-0.272556	-3.84425
DPP7_Monocytes	DPP7	Monocytes	ECM/Ligand	0.23382	0.380952	-0.421923	-1.81414
ITGB1_Monocytes	ITGB1	Monocytes	ECM/Receptor/Ligand	0.141751	0.194004	-0.309231	-2.67484
SRGN_Monocytes	SRGN	Monocytes	Ligand	0.571545	0.938859	1.43409	1.34307
PSAP_Monocytes	PSAP	Monocytes	Ligand	0.548898	0.937684	1.22418	1.13136
ANXA7_Monocytes	ANXA7	Monocytes	Ligand	0.155557	0.252792	-0.561999	-2.54577
PLAU_Monocytes	PLAU	Monocytes	Ligand	0.126368	0.170488	-0.266655	-2.81865
ENTPD1_Monocytes	ENTPD1	Monocytes	ECM/Ligand	0.0909604	0.15873	-0.494646	-3.14965
SMC3_Monocytes	SMC3	Monocytes	ECM/Ligand	0.0972557	0.17284	-0.558632	-3.0908
HTRA1_Monocytes	HTRA1	Monocytes	ECM/Ligand	0.0921583	0.136978	-0.270823	-3.13846
PTPRE_Monocytes	PTPRE	Monocytes	Receptor	0.279311	0.455614	-0.254821	-1.38887
CD151_Monocytes	CD151	Monocytes	Ligand	0.0829233	0.14756	-0.464531	-3.22479
TSPAN4_Monocytes	TSPAN4	Monocytes	Receptor	0.158406	0.231628	-0.409227	-2.51914
CHID1_Monocytes	CHID1	Monocytes	Receptor	0.038241	0.122869	-0.618194	-3.6425
CTSD_Monocytes	CTSD	Monocytes	ECM/Ligand	0.316401	0.380364	0.35235	-1.04214
NUCB2_Monocytes	NUCB2	Monocytes	Ligand	0.0520576	0.12816	-0.549809	-3.51334
CD44_Monocytes	CD44	Monocytes	Receptor	0.373922	0.62669	0.16975	-0.504401
HSD17B12_Monocytes	HSD17B12	Monocytes	ECM/Ligand	0.0462779	0.125808	-0.577142	-3.56737
SERPING1_Monocytes	SERPING1	Monocytes	ECM/Ligand	0.0883539	0.127572	-0.203767	-3.17402
ESRRA_Monocytes	ESRRA	Monocytes	Receptor	0.0033928	0.100529	-0.654608	-3.96828
CST6_Monocytes	CST6	Monocytes	Ligand	0.126698	0.167549	-0.238482	-2.81556
ADRBK1_Monocytes	ADRBK1	Monocytes	Receptor	0.0541103	0.130511	-0.556844	-3.49415
AIP_Monocytes	AIP	Monocytes	Receptor	0.135843	0.223398	-0.567992	-2.73007
P2RY6_Monocytes	P2RY6	Monocytes	Receptor	0.0524631	0.133451	-0.604379	-3.50955
RELT_Monocytes	RELT	Monocytes	Receptor	0.0200672	0.106996	-0.588599	-3.8124
TMEM123_Monocytes	TMEM123	Monocytes	Receptor	0.172307	0.269253	-0.496404	-2.38919
MMP13_Monocytes	MMP13	Monocytes	ECM/Ligand	0.0783416	0.0993533	0.0632695	-3.26762
IL18_Monocytes	IL18	Monocytes	Ligand	0.199385	0.295121	-0.375573	-2.13605
IL10RA_Monocytes	IL10RA	Monocytes	Receptor	0.194189	0.302175	-0.458231	-2.18463
AMICA1_Monocytes	AMICA1	Monocytes	Receptor	0.345834	0.542622	0.11497	-0.766975
SORL1_Monocytes	SORL1	Monocytes	Receptor	0.136633	0.208113	-0.458366	-2.72269
CD9_Monocytes	CD9	Monocytes	Receptor	0.296631	0.419753	0.0253713	-1.22695
TNFRSF1A_Monocytes	TNFRSF1A	Monocytes	Receptor	0.120986	0.195767	-0.516441	-2.86896
CD4_Monocytes	CD4	Monocytes	ECM/Receptor/Ligand	0.236284	0.383892	-0.409968	-1.7911
CD163_Monocytes	CD163	Monocytes	Receptor	0.17788	0.234568	-0.245346	-2.33709
C3AR1_Monocytes	C3AR1	Monocytes	Receptor	0.15505	0.229277	-0.425886	-2.55052
CLEC4E_Monocytes	CLEC4E	Monocytes	Receptor	0.140443	0.20047	-0.368763	-2.68707
M6PR_Monocytes	M6PR	Monocytes	Receptor	0.216097	0.351558	-0.471769	-1.97982
A2M_Monocytes	A2M	Monocytes	Ligand	0.0983409	0.152851	-0.371188	-3.08066
CD69_Monocytes	CD69	Monocytes	Receptor	0.151348	0.179894	-0.110566	-2.58512
CLEC2B_Monocytes	CLEC2B	Monocytes	Receptor	0.25265	0.388595	-0.274535	-1.63811
CLEC7A_Monocytes	CLEC7A	Monocytes	Receptor	0.260111	0.427984	-0.344058	-1.56835
OLR1_Monocytes	OLR1	Monocytes	Receptor	0.149393	0.204586	-0.314398	-2.6034
NR4A1_Monocytes	NR4A1	Monocytes	Receptor	0.265024	0.39565	-0.1848	-1.52243
ITGA5_Monocytes	ITGA5	Monocytes	Receptor	0.00741777	0.0987654	-0.59143	-3.93065
NCKAP1L_Monocytes	NCKAP1L	Monocytes	Receptor	0.110033	0.193416	-0.601419	-2.97135
MMP19_Monocytes	MMP19	Monocytes	ECM/Ligand	0.0381567	0.0970018	-0.27796	-3.64329
LRP1_Monocytes	LRP1	Monocytes	Receptor	0.0576478	0.124045	-0.45045	-3.46108
LYZ_Monocytes	LYZ	Monocytes	Ligand	0.642921	0.938272	2.10225	2.01032
GLIPR1_Monocytes	GLIPR1	Monocytes	Ligand	0.288588	0.492063	-0.279111	-1.30214
LUM_Monocytes	LUM	Monocytes	ECM/Ligand	0.338567	0.360964	0.635104	-0.834916
DCN_Monocytes	DCN	Monocytes	ECM/Ligand	0.344583	0.353909	0.719818	-0.778679
HSP90B1_Monocytes	HSP90B1	Monocytes	ECM/Ligand	0.316173	0.487948	-0.009117	-1.04427
TDG_Monocytes	TDG	Monocytes	Ligand	0.0936743	0.166373	-0.537108	-3.12428
SELPLG_Monocytes	SELPLG	Monocytes	Receptor	0.122828	0.204586	-0.562779	-2.85174
P2RX4_Monocytes	P2RX4	Monocytes	Receptor	0.0416075	0.124633	-0.607272	-3.61103
HCAR3_Monocytes	HCAR3	Monocytes	Receptor	0.0133854	0.090535	-0.410093	-3.87486
HMGB1_Monocytes	HMGB1	Monocytes	Ligand	0.461456	0.853028	0.543238	0.313908
LPAR6_Monocytes	LPAR6	Monocytes	Receptor	0.0920167	0.16167	-0.511239	-3.13978
GPR183_Monocytes	GPR183	Monocytes	Receptor	0.4223	0.673133	0.518882	-0.0521383
TNFSF13B_Monocytes	TNFSF13B	Monocytes	Ligand	0.267973	0.422693	-0.252615	-1.49486
PNP_Monocytes	PNP	Monocytes	Ligand	0.104403	0.181658	-0.563588	-3.02399
RNASE6_Monocytes	RNASE6	Monocytes	Ligand	0.383416	0.573192	0.387241	-0.415642
RNASE1_Monocytes	RNASE1	Monocytes	Ligand	0.228047	0.211052	0.376091	-1.8681
MMP14_Monocytes	MMP14	Monocytes	ECM/Ligand	0.00206223	0.0840682	-0.409083	-3.98072
DHRS4L2_Monocytes	DHRS4L2	Monocytes	Ligand	0.147817	0.239859	-0.558607	-2.61813
LGALS3_Monocytes	LGALS3	Monocytes	ECM/Ligand	0.390583	0.687831	0.191208	-0.348648
NPC2_Monocytes	NPC2	Monocytes	Ligand	0.517644	0.915344	0.966789	0.839177
IFI27_Monocytes	IFI27	Monocytes	Receptor	0.101355	0.104644	0.203609	-3.05248
IFI27L2_Monocytes	IFI27L2	Monocytes	Receptor	0.222611	0.335097	-0.341689	-1.91892
SERPINA1_Monocytes	SERPINA1	Monocytes	ECM/Ligand	0.338686	0.554968	0.0156887	-0.833799
HSP90AA1_Monocytes	HSP90AA1	Monocytes	ECM/Ligand	0.53491	0.823633	1.28051	1.00059
B2M_Monocytes	B2M	Monocytes	Ligand	0.773127	1	3.22755	3.22755
ANXA2_Monocytes	ANXA2	Monocytes	ECM/Receptor/Ligand	0.546789	0.948854	1.18739	1.11164
PKM_Monocytes	PKM	Monocytes	ECM/Ligand	0.467603	0.85244	0.601702	0.371377
IL16_Monocytes	IL16	Monocytes	Ligand	0.0731483	0.14756	-0.555936	-3.31617
ANPEP_Monocytes	ANPEP	Monocytes	Receptor	0.203512	0.263962	-0.176023	-2.09747
METRN_Monocytes	METRN	Monocytes	Ligand	0.0216828	0.0999412	-0.475091	-3.79729
GNPTG_Monocytes	GNPTG	Monocytes	Ligand	0.0542039	0.139918	-0.656365	-3.49327
NME3_Monocytes	NME3	Monocytes	Ligand	0.144363	0.229865	-0.529503	-2.65042
GFER_Monocytes	GFER	Monocytes	Ligand	0.0352536	0.122281	-0.639212	-3.67043
IL32_Monocytes	IL32	Monocytes	Ligand	0.0493846	0.0887713	-0.045047	-3.53832
IGSF6_Monocytes	IGSF6	Monocytes	Receptor	0.356782	0.566725	0.154619	-0.664628
IL4R_Monocytes	IL4R	Monocytes	Receptor	0.00922459	0.101117	-0.608477	-3.91376
SPN_Monocytes	SPN	Monocytes	ECM/Receptor/Ligand	0.0158811	0.10876	-0.651334	-3.85153
TMEM219_Monocytes	TMEM219	Monocytes	Receptor	0.251407	0.417402	-0.389313	-1.64972
ALDOA_Monocytes	ALDOA	Monocytes	Ligand	0.431198	0.794827	0.362317	0.0310379
ITGAM_Monocytes	ITGAM	Monocytes	Receptor	0.0989521	0.177543	-0.581499	-3.07494
ITGAX_Monocytes	ITGAX	Monocytes	Receptor	0.0270977	0.112875	-0.600014	-3.74667
MMP2_Monocytes	MMP2	Monocytes	ECM/Ligand	0.0148636	0.0811287	-0.238012	-3.86104
CCL17_Monocytes	CCL17	Monocytes	Ligand	0.127507	0.0681952	1.06588	-2.808
CKLF_Monocytes	CKLF	Monocytes	Ligand	0.407066	0.692534	0.335472	-0.194555
CMTM3_Monocytes	CMTM3	Monocytes	Ligand	0.179631	0.285126	-0.510562	-2.32072
GLG1_Monocytes	GLG1	Monocytes	ECM/Ligand	0.0184869	0.108172	-0.619145	-3.82717
GLOD4_Monocytes	GLOD4	Monocytes	Ligand	0.0767408	0.157554	-0.616883	-3.28259
SERPINF2_Monocytes	SERPINF2	Monocytes	Ligand	0.0253612	0.110523	-0.585881	-3.76291
SERPINF1_Monocytes	SERPINF1	Monocytes	ECM/Ligand	0.328995	0.469724	0.165672	-0.924398
ITGAE_Monocytes	ITGAE	Monocytes	Receptor	0.11152	0.195767	-0.604956	-2.95746
CXCL16_Monocytes	CXCL16	Monocytes	Ligand	0.244173	0.368607	-0.277607	-1.71736
C1QBP_Monocytes	C1QBP	Monocytes	Ligand	0.313724	0.52381	-0.134315	-1.06715
ASGR1_Monocytes	ASGR1	Monocytes	Receptor	0.138741	0.209289	-0.446782	-2.70298
TNFSF12_Monocytes	TNFSF12	Monocytes	Ligand	0.0792694	0.159906	-0.614611	-3.25895
EVI2A_Monocytes	EVI2A	Monocytes	Receptor	0.154832	0.238095	-0.482368	-2.55255
CCL2_Monocytes	CCL2	Monocytes	Ligand	0.153249	0.0987654	0.77225	-2.56735
CCL5_Monocytes	CCL5	Monocytes	Ligand	0.12818	0.127572	0.168629	-2.80171
CCL3_Monocytes	CCL3	Monocytes	Ligand	0.534454	0.540858	1.88299	0.996324
CCL4_Monocytes	CCL4	Monocytes	Ligand	0.393706	0.340388	1.23526	-0.319449
CCR7_Monocytes	CCR7	Monocytes	Receptor	0.127687	0.0582011	1.29619	-2.80632
GRN_Monocytes	GRN	Monocytes	Ligand	0.433975	0.814815	0.352454	0.0570064
ABI3_Monocytes	ABI3	Monocytes	ECM/Ligand	0.183913	0.281011	-0.44955	-2.28069
COL1A1_Monocytes	COL1A1	Monocytes	ECM/Ligand	0.497138	0.510876	1.61642	0.647478
TIMP2_Monocytes	TIMP2	Monocytes	ECM/Ligand	0.113394	0.171076	-0.392935	-2.93993
P4HB_Monocytes	P4HB	Monocytes	Receptor	0.222112	0.335097	-0.346358	-1.92359
EMILIN2_Monocytes	EMILIN2	Monocytes	ECM/Ligand	0.134	0.218695	-0.554532	-2.7473
THBD_Monocytes	THBD	Monocytes	Receptor	0.0825336	0.135802	-0.348385	-3.22843
CD93_Monocytes	CD93	Monocytes	Receptor	0.0836728	0.151088	-0.491602	-3.21778
CST3_Monocytes	CST3	Monocytes	ECM/Ligand	0.717002	0.992945	2.71308	2.70287
EDEM2_Monocytes	EDEM2	Monocytes	Ligand	0.00195281	0.101117	-0.676487	-3.98174
PLTP_Monocytes	PLTP	Monocytes	ECM/Ligand	0.215416	0.270429	-0.0996446	-1.98619
MMP9_Monocytes	MMP9	Monocytes	ECM/Ligand	0.406116	0.518519	0.744075	-0.203432
CD40_Monocytes	CD40	Monocytes	Receptor	0.0762275	0.143445	-0.486338	-3.28738
SULF2_Monocytes	SULF2	Monocytes	Ligand	0.0123849	0.102293	-0.595598	-3.88421
OGFR_Monocytes	OGFR	Monocytes	Receptor	0.0599438	0.138154	-0.58439	-3.43961
BSG_Monocytes	BSG	Monocytes	Receptor	0.215091	0.329806	-0.389034	-1.98922
CFD_Monocytes	CFD	Monocytes	Ligand	0.226552	0.29806	-0.135878	-1.88208
EBI3_Monocytes	EBI3	Monocytes	Receptor	0.0137735	0.0634921	0.105418	-3.87123
C19orf10_Monocytes	C19orf10	Monocytes	Ligand	0.325769	0.549677	-0.0912501	-0.954555
MCOLN1_Monocytes	MCOLN1	Monocytes	Receptor	0.0153977	0.106408	-0.624321	-3.85605
HNRNPM_Monocytes	HNRNPM	Monocytes	ECM/Ligand	0.279042	0.465608	-0.288631	-1.39138
ICAM1_Monocytes	ICAM1	Monocytes	Ligand	0.174978	0.251029	-0.370323	-2.36422
ICAM3_Monocytes	ICAM3	Monocytes	Ligand	0.103368	0.164021	-0.425933	-3.03367
IL27RA_Monocytes	IL27RA	Monocytes	Receptor	0.0124385	0.102881	-0.603364	-3.88371
RPSAP58_Monocytes	RPSAP58	Monocytes	Receptor	0.0401039	0.126396	-0.641604	-3.62508
GPI_Monocytes	GPI	Monocytes	Ligand	0.0517213	0.135802	-0.636515	-3.51648
HCST_Monocytes	HCST	Monocytes	Receptor	0.380339	0.6408	0.197622	-0.44441
TYROBP_Monocytes	TYROBP	Monocytes	Ligand	0.62163	0.946502	1.89061	1.81129
TGFB1_Monocytes	TGFB1	Monocytes	ECM/Ligand	0.186364	0.281011	-0.426634	-2.25778
PLAUR_Monocytes	PLAUR	Monocytes	Receptor	0.430786	0.677837	0.588166	0.0271903
PVRL2_Monocytes	PVRL2	Monocytes	Receptor	0.122629	0.196943	-0.509722	-2.85361
APOE_Monocytes	APOE	Monocytes	ECM/Ligand	0.437473	0.398589	1.41671	0.0897051
APOC1_Monocytes	APOC1	Monocytes	Ligand	0.316425	0.248677	0.965679	-1.0419
SLC1A5_Monocytes	SLC1A5	Monocytes	Receptor	0.0221464	0.113463	-0.653813	-3.79296
C5AR1_Monocytes	C5AR1	Monocytes	Receptor	0.162696	0.21458	-0.258819	-2.47903
FCGRT_Monocytes	FCGRT	Monocytes	Receptor	0.402363	0.717813	0.239788	-0.238516
IL4I1_Monocytes	IL4I1	Monocytes	Ligand	0.215625	0.259847	-0.0401052	-1.98424
NR1H2_Monocytes	NR1H2	Monocytes	Receptor	0.0975929	0.181658	-0.627266	-3.08765
CLEC11A_Monocytes	CLEC11A	Monocytes	Ligand	0.180406	0.22575	-0.166449	-2.31348
SIGLEC7_Monocytes	SIGLEC7	Monocytes	Receptor	0.0134385	0.106996	-0.650593	-3.87436
CD33_Monocytes	CD33	Monocytes	Receptor	0.171631	0.268665	-0.499569	-2.39551
FPR1_Monocytes	FPR1	Monocytes	Receptor	0.182179	0.255144	-0.32645	-2.2969
FPR3_Monocytes	FPR3	Monocytes	Receptor	0.197238	0.293945	-0.389885	-2.15612
MYADM_Monocytes	MYADM	Monocytes	Receptor	0.0898064	0.16167	-0.531907	-3.16044
OSCAR_Monocytes	OSCAR	Monocytes	Receptor	0.053449	0.132863	-0.58879	-3.50033
LILRB2_Monocytes	LILRB2	Monocytes	Receptor	0.165153	0.251617	-0.465561	-2.45607
LAIR1_Monocytes	LAIR1	Monocytes	Receptor	0.111796	0.183422	-0.508397	-2.95487
LILRA2_Monocytes	LILRA2	Monocytes	Receptor	0.00426028	0.0917108	-0.51405	-3.96017
LILRB1_Monocytes	LILRB1	Monocytes	Receptor	0.0407615	0.123457	-0.601509	-3.61894
LILRB4_Monocytes	LILRB4	Monocytes	Receptor	0.138934	0.213404	-0.473071	-2.70118
A1BG_Monocytes	A1BG	Monocytes	Ligand	0.113806	0.193416	-0.566141	-2.93608
IL17RA_Monocytes	IL17RA	Monocytes	Receptor	0.0425945	0.126984	-0.625008	-3.6018
MIF_Monocytes	MIF	Monocytes	Ligand	0.358639	0.577307	0.145285	-0.647273
OSM_Monocytes	OSM	Monocytes	Ligand	0.146831	0.171664	-0.0852414	-2.62735
TIMP3_Monocytes	TIMP3	Monocytes	ECM/Ligand	0.185257	0.196355	0.0801555	-2.26813
MFNG_Monocytes	MFNG	Monocytes	Ligand	0.0887831	0.171076	-0.623059	-3.17001
LGALS1_Monocytes	LGALS1	Monocytes	ECM/Ligand	0.668773	0.987066	2.27078	2.252
CRELD2_Monocytes	CRELD2	Monocytes	ECM/Ligand	0.127175	0.202822	-0.509641	-2.8111
PLXNB2_Monocytes	PLXNB2	Monocytes	Receptor	0.0749044	0.146972	-0.533755	-3.29975
APP_Monocytes	APP	Monocytes	Receptor/Ligand	0.03068	0.111111	-0.543793	-3.71318
SOD1_Monocytes	SOD1	Monocytes	ECM/Ligand	0.256653	0.416226	-0.336203	-1.60068
IFNAR2_Monocytes	IFNAR2	Monocytes	Receptor	0.0258637	0.115814	-0.648641	-3.75821
IL10RB_Monocytes	IL10RB	Monocytes	Receptor	0.0806407	0.156966	-0.575023	-3.24613
IFNAR1_Monocytes	IFNAR1	Monocytes	Receptor	0.0589425	0.140506	-0.618102	-3.44897
IFNGR2_Monocytes	IFNGR2	Monocytes	Receptor	0.221003	0.346855	-0.406471	-1.93395
RUNX1_Monocytes	RUNX1	Monocytes	ECM/Ligand	0.033223	0.118166	-0.608816	-3.68941
ITGB2_Monocytes	ITGB2	Monocytes	Receptor	0.403256	0.731922	0.220048	-0.230175
COL6A1_Monocytes	COL6A1	Monocytes	ECM/Ligand	0.250104	0.272781	0.212172	-1.66191
COL6A2_Monocytes	COL6A2	Monocytes	ECM/Ligand	0.252807	0.272193	0.240555	-1.63664
S100B_Monocytes	S100B	Monocytes	Ligand	0.0745636	0.0823045	0.29953	-3.30294
CCL3L1_Monocytes	CCL3L1	Monocytes	Ligand	0.211048	0.199295	0.299856	-2.02702
SDF4_Pre-osteoclast	SDF4	Pre-osteoclast	Ligand	0.198205	0.328165	-0.527464	-2.13483
TNFRSF14_Pre-osteoclast	TNFRSF14	Pre-osteoclast	Receptor	0.0102124	0.0968992	-0.536897	-3.90365
TNFRSF9_Pre-osteoclast	TNFRSF9	Pre-osteoclast	Receptor	0.0790526	0.158269	-0.596751	-3.25593
APITD1_Pre-osteoclast	APITD1	Pre-osteoclast	Ligand	0.0555164	0.142765	-0.669536	-3.47738
AGTRAP_Pre-osteoclast	AGTRAP	Pre-osteoclast	Receptor	0.0613386	0.144057	-0.627735	-3.4226
C1QA_Pre-osteoclast	C1QA	Pre-osteoclast	Ligand	0.20004	0.204134	0.174684	-2.11757
C1QC_Pre-osteoclast	C1QC	Pre-osteoclast	Ligand	0.123202	0.142119	-0.0259854	-2.84053
C1QB_Pre-osteoclast	C1QB	Pre-osteoclast	Ligand	0.0602472	0.106589	-0.203448	-3.43287
PPT1_Pre-osteoclast	PPT1	Pre-osteoclast	ECM/Ligand	0.264598	0.456072	-0.377553	-1.51015
TM2D1_Pre-osteoclast	TM2D1	Pre-osteoclast	Receptor	0.028341	0.116925	-0.637272	-3.73308
CD58_Pre-osteoclast	CD58	Pre-osteoclast	Receptor	0.207563	0.324935	-0.425141	-2.04679
S100A4_Pre-osteoclast	S100A4	Pre-osteoclast	Ligand	0.653958	0.984496	2.17587	2.15333
SLC39A1_Pre-osteoclast	SLC39A1	Pre-osteoclast	Receptor	0.200805	0.315891	-0.44801	-2.11037
IL6R_Pre-osteoclast	IL6R	Pre-osteoclast	Receptor	0.0143664	0.102713	-0.581856	-3.86456
ADAM15_Pre-osteoclast	ADAM15	Pre-osteoclast	ECM/Ligand	0.0961071	0.177649	-0.602889	-3.09547
SEMA4A_Pre-osteoclast	SEMA4A	Pre-osteoclast	Receptor	0.0737816	0.153101	-0.598466	-3.30553
APOA1BP_Pre-osteoclast	APOA1BP	Pre-osteoclast	Ligand	0.174962	0.299096	-0.612368	-2.35353
HDGF_Pre-osteoclast	HDGF	Pre-osteoclast	Ligand	0.301384	0.567183	-0.345954	-1.16402
FCER1A_Pre-osteoclast	FCER1A	Pre-osteoclast	Receptor	0.0514687	0.0775194	0.173346	-3.51547
CD84_Pre-osteoclast	CD84	Pre-osteoclast	Receptor	0.317648	0.542636	-0.129094	-1.011
CD48_Pre-osteoclast	CD48	Pre-osteoclast	Receptor	0.0856424	0.147933	-0.437302	-3.19393
FCER1G_Pre-osteoclast	FCER1G	Pre-osteoclast	Receptor	0.343781	0.549096	0.0997214	-0.765114
CREG1_Pre-osteoclast	CREG1	Pre-osteoclast	Ligand	0.115493	0.19832	-0.579254	-2.91307
TPR_Pre-osteoclast	TPR	Pre-osteoclast	Receptor	0.229683	0.382429	-0.452022	-1.83866
PTPRC_Pre-osteoclast	PTPRC	Pre-osteoclast	Receptor	0.236203	0.397933	-0.448002	-1.77731
LAD1_Pre-osteoclast	LAD1	Pre-osteoclast	ECM/Ligand	0.0554232	0.125969	-0.48985	-3.47826
RNPEP_Pre-osteoclast	RNPEP	Pre-osteoclast	Ligand	0.196629	0.339147	-0.58978	-2.14966
ADIPOR1_Pre-osteoclast	ADIPOR1	Pre-osteoclast	Receptor	0.1452	0.244832	-0.603632	-2.63355
NENF_Pre-osteoclast	NENF	Pre-osteoclast	Ligand	0.193209	0.30491	-0.468434	-2.18184
HPCAL1_Pre-osteoclast	HPCAL1	Pre-osteoclast	ECM/Ligand	0.0433453	0.127261	-0.618247	-3.5919
POMC_Pre-osteoclast	POMC	Pre-osteoclast	Ligand	0.0766455	0.155039	-0.589659	-3.27858
PRADC1_Pre-osteoclast	PRADC1	Pre-osteoclast	Ligand	0.143669	0.245478	-0.621846	-2.64796
SLC20A1_Pre-osteoclast	SLC20A1	Pre-osteoclast	Receptor	0.0784548	0.144703	-0.4731	-3.26156
NR4A2_Pre-osteoclast	NR4A2	Pre-osteoclast	Receptor	0.193115	0.247416	-0.167893	-2.18273
ITGAV_Pre-osteoclast	ITGAV	Pre-osteoclast	ECM/Receptor/Ligand	0.188544	0.276486	-0.371169	-2.22574
COL3A1_Pre-osteoclast	COL3A1	Pre-osteoclast	ECM/Ligand	0.338013	0.273256	1.05223	-0.819387
COL5A2_Pre-osteoclast	COL5A2	Pre-osteoclast	ECM/Ligand	0.071709	0.113049	-0.180459	-3.32503
NRP2_Pre-osteoclast	NRP2	Pre-osteoclast	Receptor	0.363372	0.640827	0.0611882	-0.580781
FN1_Pre-osteoclast	FN1	Pre-osteoclast	ECM/Ligand	0.344903	0.308786	0.940715	-0.754554
IGFBP2_Pre-osteoclast	IGFBP2	Pre-osteoclast	Ligand	0.248929	0.283592	0.160438	-1.65757
SERPINE2_Pre-osteoclast	SERPINE2	Pre-osteoclast	ECM/Ligand	0.00397542	0.0723514	-0.174161	-3.96233
CCL20_Pre-osteoclast	CCL20	Pre-osteoclast	Ligand	0.0363744	0.0542636	0.545834	-3.65749
COL6A3_Pre-osteoclast	COL6A3	Pre-osteoclast	ECM/Ligand	0.0465995	0.0891473	-0.0741119	-3.56128
CMTM7_Pre-osteoclast	CMTM7	Pre-osteoclast	Receptor	0.078315	0.159561	-0.615422	-3.26287
CMTM6_Pre-osteoclast	CMTM6	Pre-osteoclast	Ligand	0.148329	0.244832	-0.574189	-2.60411
GLB1_Pre-osteoclast	GLB1	Pre-osteoclast	Ligand	0.0392342	0.129199	-0.678745	-3.63058
CRTAP_Pre-osteoclast	CRTAP	Pre-osteoclast	ECM/Ligand	0.0285992	0.114987	-0.61073	-3.73065
RPSA_Pre-osteoclast	RPSA	Pre-osteoclast	Receptor	0.53908	0.956718	1.13628	1.07244
CCR1_Pre-osteoclast	CCR1	Pre-osteoclast	Receptor	0.0721927	0.152455	-0.60732	-3.32048
HYAL2_Pre-osteoclast	HYAL2	Pre-osteoclast	Receptor	0.120918	0.208656	-0.60149	-2.86203
MANF_Pre-osteoclast	MANF	Pre-osteoclast	Ligand	0.325185	0.536822	-0.0426345	-0.940079
CD47_Pre-osteoclast	CD47	Pre-osteoclast	Receptor	0.189528	0.296512	-0.46279	-2.21648
CCDC80_Pre-osteoclast	CCDC80	Pre-osteoclast	ECM/Ligand	0.0138892	0.0807494	-0.239264	-3.86905
CD86_Pre-osteoclast	CD86	Pre-osteoclast	Receptor	0.0125108	0.100129	-0.562566	-3.88202
TPRA1_Pre-osteoclast	TPRA1	Pre-osteoclast	Receptor	0.015023	0.107881	-0.646494	-3.85839
PLXND1_Pre-osteoclast	PLXND1	Pre-osteoclast	Receptor	0.164906	0.257106	-0.488759	-2.44814
SUCNR1_Pre-osteoclast	SUCNR1	Pre-osteoclast	Receptor	0.0595894	0.137597	-0.578011	-3.43906
TFRC_Pre-osteoclast	TFRC	Pre-osteoclast	Receptor	0.174737	0.245478	-0.32949	-2.35565
C4orf48_Pre-osteoclast	C4orf48	Pre-osteoclast	Ligand	0.283027	0.485142	-0.293288	-1.33675
LRPAP1_Pre-osteoclast	LRPAP1	Pre-osteoclast	Receptor	0.180875	0.29845	-0.553608	-2.29789
IGFBP7_Pre-osteoclast	IGFBP7	Pre-osteoclast	ECM/Ligand	0.0828235	0.128553	-0.261261	-3.22045
IL8_Pre-osteoclast	IL8	Pre-osteoclast	Ligand	0.180314	0.165375	0.292834	-2.30317
CXCL1_Pre-osteoclast	CXCL1	Pre-osteoclast	Ligand	0.0736819	0.0833333	0.27808	-3.30647
CXCL5_Pre-osteoclast	CXCL5	Pre-osteoclast	Ligand	0.0630964	0.0645995	0.545813	-3.40607
CXCL3_Pre-osteoclast	CXCL3	Pre-osteoclast	Ligand	0.34993	0.376615	0.701537	-0.707254
CXCL2_Pre-osteoclast	CXCL2	Pre-osteoclast	Ligand	0.257158	0.252584	0.404918	-1.58014
ANTXR2_Pre-osteoclast	ANTXR2	Pre-osteoclast	Receptor	0.0474144	0.133075	-0.644394	-3.55362
HSD17B11_Pre-osteoclast	HSD17B11	Pre-osteoclast	Ligand	0.0483709	0.128553	-0.585518	-3.54462
IBSP_Pre-osteoclast	IBSP	Pre-osteoclast	Ligand	0.30723	0.232558	0.995242	-1.10902
SPP1_Pre-osteoclast	SPP1	Pre-osteoclast	ECM/Ligand	0.464964	0.48062	1.4321	0.375089
AIMP1_Pre-osteoclast	AIMP1	Pre-osteoclast	Ligand	0.271453	0.498708	-0.441979	-1.44565
ANXA5_Pre-osteoclast	ANXA5	Pre-osteoclast	Ligand	0.24219	0.375323	-0.307278	-1.72098
HMGB2_Pre-osteoclast	HMGB2	Pre-osteoclast	Ligand	0.427783	0.594315	0.775936	0.0252551
IL7R_Pre-osteoclast	IL7R	Pre-osteoclast	Receptor	0.269834	0.29199	0.315044	-1.46088
SNX2_Pre-osteoclast	SNX2	Pre-osteoclast	Ligand	0.109034	0.193798	-0.606758	-2.97384
TGFBI_Pre-osteoclast	TGFBI	Pre-osteoclast	ECM/Ligand	0.283404	0.337209	0.235008	-1.3332
SIL1_Pre-osteoclast	SIL1	Pre-osteoclast	Ligand	0.0829473	0.161499	-0.589242	-3.21929
CD14_Pre-osteoclast	CD14	Pre-osteoclast	Receptor	0.0320006	0.0665375	0.210488	-3.69864
NR3C1_Pre-osteoclast	NR3C1	Pre-osteoclast	Receptor	0.0404624	0.118217	-0.539035	-3.61903
CSF1R_Pre-osteoclast	CSF1R	Pre-osteoclast	Receptor	0.342357	0.633075	-0.118989	-0.778512
CD74_Pre-osteoclast	CD74	Pre-osteoclast	Receptor	0.658158	0.931525	2.29518	2.19285
SPARC_Pre-osteoclast	SPARC	Pre-osteoclast	ECM/Ligand	0.331818	0.28876	0.914327	-0.877672
LY86_Pre-osteoclast	LY86	Pre-osteoclast	Ligand	0.0182184	0.106589	-0.599035	-3.82832
HLA-F_Pre-osteoclast	HLA-F	Pre-osteoclast	Receptor	0.0063343	0.100129	-0.620706	-3.94014
HLA-A_Pre-osteoclast	HLA-A	Pre-osteoclast	Receptor	0.391916	0.644057	0.322507	-0.312213
HLA-E_Pre-osteoclast	HLA-E	Pre-osteoclast	Receptor	0.250628	0.414083	-0.36966	-1.64159
HLA-C_Pre-osteoclast	HLA-C	Pre-osteoclast	Receptor	0.374814	0.689276	0.0636963	-0.473129
HLA-B_Pre-osteoclast	HLA-B	Pre-osteoclast	Receptor	0.433549	0.7823	0.43371	0.0795127
HLA-DRA_Pre-osteoclast	HLA-DRA	Pre-osteoclast	Receptor	0.554716	0.788114	1.56309	1.21957
HLA-DRB1_Pre-osteoclast	HLA-DRB1	Pre-osteoclast	Receptor	0.522613	0.826873	1.19177	0.917513
HLA-DQA1_Pre-osteoclast	HLA-DQA1	Pre-osteoclast	Receptor	0.402943	0.631783	0.454015	-0.208464
HLA-DQB1_Pre-osteoclast	HLA-DQB1	Pre-osteoclast	Receptor	0.39	0.562661	0.499393	-0.330243
HLA-DQA2_Pre-osteoclast	HLA-DQA2	Pre-osteoclast	Receptor	0.110529	0.135013	-0.0712521	-2.95977
HLA-DPA1_Pre-osteoclast	HLA-DPA1	Pre-osteoclast	Receptor	0.469463	0.657623	1.02208	0.417426
CTGF_Pre-osteoclast	CTGF	Pre-osteoclast	ECM/Ligand	0.0570273	0.0885013	0.0345274	-3.46317
VNN1_Pre-osteoclast	VNN1	Pre-osteoclast	Ligand	0.00408289	0.0975452	-0.604181	-3.96132
IFNGR1_Pre-osteoclast	IFNGR1	Pre-osteoclast	Receptor	0.09826	0.160853	-0.439349	-3.07521
RNASET2_Pre-osteoclast	RNASET2	Pre-osteoclast	Ligand	0.20608	0.325581	-0.441956	-2.06074
FAM20C_Pre-osteoclast	FAM20C	Pre-osteoclast	Ligand	0.0181495	0.0949612	-0.433041	-3.82897
AHR_Pre-osteoclast	AHR	Pre-osteoclast	Receptor	0.0682872	0.150517	-0.625621	-3.35723
GPNMB_Pre-osteoclast	GPNMB	Pre-osteoclast	Receptor	0.0496958	0.118217	-0.452128	-3.53215
CPVL_Pre-osteoclast	CPVL	Pre-osteoclast	Ligand	0.142334	0.200904	-0.345338	-2.66052
SFRP4_Pre-osteoclast	SFRP4	Pre-osteoclast	Ligand	0.104907	0.0975452	0.344776	-3.01267
DBNL_Pre-osteoclast	DBNL	Pre-osteoclast	Ligand	0.253013	0.455426	-0.484518	-1.61915
COL1A2_Pre-osteoclast	COL1A2	Pre-osteoclast	ECM/Ligand	0.441775	0.355297	1.64978	0.156903
PCOLCE_Pre-osteoclast	PCOLCE	Pre-osteoclast	ECM/Ligand	0.132188	0.142765	0.0520398	-2.75598
TSPAN33_Pre-osteoclast	TSPAN33	Pre-osteoclast	Receptor	0.0709629	0.140827	-0.504441	-3.33205
DHRSX_Pre-osteoclast	DHRSX	Pre-osteoclast	Ligand	0.0119779	0.107881	-0.675157	-3.88704
ATP6AP2_Pre-osteoclast	ATP6AP2	Pre-osteoclast	Receptor	0.236085	0.374677	-0.36224	-1.77842
TIMP1_Pre-osteoclast	TIMP1	Pre-osteoclast	ECM/Ligand	0.324817	0.29845	0.800836	-0.943542
EBP_Pre-osteoclast	EBP	Pre-osteoclast	Receptor	0.240592	0.408269	-0.443701	-1.73602
EFNB1_Pre-osteoclast	EFNB1	Pre-osteoclast	Ligand	0.0233005	0.101421	-0.4795	-3.7805
IL2RG_Pre-osteoclast	IL2RG	Pre-osteoclast	Receptor	0.0962054	0.174419	-0.575493	-3.09454
IL13RA1_Pre-osteoclast	IL13RA1	Pre-osteoclast	Receptor	0.0548269	0.133721	-0.581615	-3.48387
MSRA_Pre-osteoclast	MSRA	Pre-osteoclast	Ligand	0.000728164	0.100129	-0.673477	-3.99289
CTSB_Pre-osteoclast	CTSB	Pre-osteoclast	ECM/Ligand	0.350018	0.512274	0.258543	-0.706433
TNFRSF10B_Pre-osteoclast	TNFRSF10B	Pre-osteoclast	Receptor	0.0105271	0.104651	-0.644962	-3.90069
FGFR1_Pre-osteoclast	FGFR1	Pre-osteoclast	Receptor	0.0557698	0.103359	-0.201197	-3.475
ADAM9_Pre-osteoclast	ADAM9	Pre-osteoclast	ECM/Receptor/Ligand	0.0530621	0.135013	-0.612096	-3.50048
GGH_Pre-osteoclast	GGH	Pre-osteoclast	Ligand	0.21438	0.356589	-0.495093	-1.98264
LY96_Pre-osteoclast	LY96	Pre-osteoclast	Receptor	0.106959	0.180879	-0.52676	-2.99337
SLC52A2_Pre-osteoclast	SLC52A2	Pre-osteoclast	Receptor	0.101972	0.186693	-0.619332	-3.04029
SIGMAR1_Pre-osteoclast	SIGMAR1	Pre-osteoclast	Receptor	0.142491	0.242894	-0.617667	-2.65905
STOML2_Pre-osteoclast	STOML2	Pre-osteoclast	Ligand	0.305531	0.566537	-0.305292	-1.125
TMEM2_Pre-osteoclast	TMEM2	Pre-osteoclast	Receptor	0.0307441	0.109819	-0.524202	-3.71047
ANXA1_Pre-osteoclast	ANXA1	Pre-osteoclast	ECM/Ligand	0.439766	0.761628	0.530834	0.138002
SEMA4D_Pre-osteoclast	SEMA4D	Pre-osteoclast	Receptor	0.0174819	0.103359	-0.561575	-3.83525
ABCA1_Pre-osteoclast	ABCA1	Pre-osteoclast	Receptor	0.0250024	0.111111	-0.59512	-3.76449
COL27A1_Pre-osteoclast	COL27A1	Pre-osteoclast	ECM/Ligand	0.170462	0.242894	-0.354452	-2.39587
GSN_Pre-osteoclast	GSN	Pre-osteoclast	Ligand	0.417094	0.775194	0.292044	-0.0753163
STOM_Pre-osteoclast	STOM	Pre-osteoclast	Ligand	0.0688715	0.150517	-0.620122	-3.35173
ENG_Pre-osteoclast	ENG	Pre-osteoclast	Receptor	0.23254	0.381783	-0.422701	-1.81178
COL5A1_Pre-osteoclast	COL5A1	Pre-osteoclast	ECM/Ligand	0.0332652	0.0813953	-0.0683789	-3.68675
FCN1_Pre-osteoclast	FCN1	Pre-osteoclast	Receptor/Ligand	0.36694	0.437339	0.645925	-0.547215
DPP7_Pre-osteoclast	DPP7	Pre-osteoclast	ECM/Ligand	0.274529	0.492248	-0.394225	-1.41671
BAMBI_Pre-osteoclast	BAMBI	Pre-osteoclast	Receptor	0.117351	0.167959	-0.32205	-2.89559
ITGB1_Pre-osteoclast	ITGB1	Pre-osteoclast	ECM/Receptor/Ligand	0.186725	0.260336	-0.301454	-2.24285
SRGN_Pre-osteoclast	SRGN	Pre-osteoclast	Ligand	0.27971	0.378553	0.0334051	-1.36795
PSAP_Pre-osteoclast	PSAP	Pre-osteoclast	Ligand	0.509725	0.932171	0.89758	0.796248
ANXA7_Pre-osteoclast	ANXA7	Pre-osteoclast	Ligand	0.1605	0.265504	-0.576592	-2.4896
PLAU_Pre-osteoclast	PLAU	Pre-osteoclast	Ligand	0.208694	0.277132	-0.184925	-2.03614
SMC3_Pre-osteoclast	SMC3	Pre-osteoclast	ECM/Ligand	0.236796	0.403101	-0.461039	-1.77173
HTRA1_Pre-osteoclast	HTRA1	Pre-osteoclast	ECM/Ligand	0.0242901	0.0839793	-0.197944	-3.77119
PTPRE_Pre-osteoclast	PTPRE	Pre-osteoclast	Receptor	0.0938195	0.157623	-0.451876	-3.11699
CD151_Pre-osteoclast	CD151	Pre-osteoclast	Ligand	0.111448	0.178941	-0.468968	-2.95112
TSPAN4_Pre-osteoclast	TSPAN4	Pre-osteoclast	Receptor	0.16987	0.266796	-0.495425	-2.40144
CHID1_Pre-osteoclast	CHID1	Pre-osteoclast	Receptor	0.0980849	0.186047	-0.65091	-3.07686
CTSD_Pre-osteoclast	CTSD	Pre-osteoclast	ECM/Ligand	0.37384	0.592377	0.273098	-0.482287
ADM_Pre-osteoclast	ADM	Pre-osteoclast	Ligand	0.182065	0.199612	0.0378582	-2.28669
NUCB2_Pre-osteoclast	NUCB2	Pre-osteoclast	Ligand	0.0346354	0.114341	-0.545788	-3.67385
CD44_Pre-osteoclast	CD44	Pre-osteoclast	Receptor	0.289851	0.4677	-0.176259	-1.27254
FJX1_Pre-osteoclast	FJX1	Pre-osteoclast	ECM/Ligand	0.145879	0.22093	-0.449049	-2.62717
HSD17B12_Pre-osteoclast	HSD17B12	Pre-osteoclast	ECM/Ligand	0.0797823	0.156331	-0.57211	-3.24907
SERPING1_Pre-osteoclast	SERPING1	Pre-osteoclast	ECM/Ligand	0.0696471	0.102713	-0.0615412	-3.34443
ESRRA_Pre-osteoclast	ESRRA	Pre-osteoclast	Receptor	0.200159	0.335917	-0.542754	-2.11644
CST6_Pre-osteoclast	CST6	Pre-osteoclast	Ligand	0.0346712	0.103359	-0.39978	-3.67352
ADRBK1_Pre-osteoclast	ADRBK1	Pre-osteoclast	Receptor	0.0196646	0.109173	-0.619978	-3.81471
AIP_Pre-osteoclast	AIP	Pre-osteoclast	Receptor	0.071099	0.155039	-0.64186	-3.33077
GAL_Pre-osteoclast	GAL	Pre-osteoclast	Ligand	0.413388	0.52584	0.817096	-0.110185
TMEM123_Pre-osteoclast	TMEM123	Pre-osteoclast	Receptor	0.0632964	0.146641	-0.634957	-3.40418
MMP13_Pre-osteoclast	MMP13	Pre-osteoclast	ECM/Ligand	0.0583766	0.0923773	-0.0146107	-3.45047
AMICA1_Pre-osteoclast	AMICA1	Pre-osteoclast	Receptor	0.0529279	0.120801	-0.452902	-3.50174
OAF_Pre-osteoclast	OAF	Pre-osteoclast	Ligand	0.0703908	0.153747	-0.636452	-3.33743
SORL1_Pre-osteoclast	SORL1	Pre-osteoclast	Receptor	0.0241057	0.111111	-0.60356	-3.77293
CD9_Pre-osteoclast	CD9	Pre-osteoclast	Receptor	0.222718	0.335917	-0.330483	-1.90419
CD4_Pre-osteoclast	CD4	Pre-osteoclast	ECM/Receptor/Ligand	0.220821	0.362403	-0.457823	-1.92204
M6PR_Pre-osteoclast	M6PR	Pre-osteoclast	Receptor	0.250834	0.447028	-0.478166	-1.63965
CLEC2B_Pre-osteoclast	CLEC2B	Pre-osteoclast	Receptor	0.0655013	0.139535	-0.542547	-3.38344
CLEC7A_Pre-osteoclast	CLEC7A	Pre-osteoclast	Receptor	0.0209377	0.107881	-0.59082	-3.80273
NR4A1_Pre-osteoclast	NR4A1	Pre-osteoclast	Receptor	0.0850376	0.132429	-0.283277	-3.19962
ITGA5_Pre-osteoclast	ITGA5	Pre-osteoclast	Receptor	0.181832	0.281008	-0.457725	-2.28888
NCKAP1L_Pre-osteoclast	NCKAP1L	Pre-osteoclast	Receptor	0.120502	0.208656	-0.605405	-2.86594
MMP19_Pre-osteoclast	MMP19	Pre-osteoclast	ECM/Ligand	0.160867	0.223514	-0.324782	-2.48614
LYZ_Pre-osteoclast	LYZ	Pre-osteoclast	Ligand	0.396748	0.552972	0.587949	-0.266749
GLIPR1_Pre-osteoclast	GLIPR1	Pre-osteoclast	Ligand	0.193455	0.299742	-0.441463	-2.17953
LUM_Pre-osteoclast	LUM	Pre-osteoclast	ECM/Ligand	0.316891	0.257752	0.937759	-1.01812
DCN_Pre-osteoclast	DCN	Pre-osteoclast	ECM/Ligand	0.313346	0.25323	0.929928	-1.05148
HSP90B1_Pre-osteoclast	HSP90B1	Pre-osteoclast	ECM/Ligand	0.427425	0.759044	0.419622	0.0218881
TDG_Pre-osteoclast	TDG	Pre-osteoclast	Ligand	0.226858	0.389535	-0.505162	-1.86524
SELPLG_Pre-osteoclast	SELPLG	Pre-osteoclast	Receptor	0.182186	0.292636	-0.512896	-2.28556
SLC7A1_Pre-osteoclast	SLC7A1	Pre-osteoclast	Receptor	0.0237791	0.111757	-0.614997	-3.776
HMGB1_Pre-osteoclast	HMGB1	Pre-osteoclast	Ligand	0.568873	0.95478	1.41953	1.35277
GPR183_Pre-osteoclast	GPR183	Pre-osteoclast	Receptor	0.225066	0.328811	-0.277547	-1.8821
PNP_Pre-osteoclast	PNP	Pre-osteoclast	Ligand	0.281659	0.50323	-0.358963	-1.34962
RNASE6_Pre-osteoclast	RNASE6	Pre-osteoclast	Ligand	0.197605	0.300388	-0.40552	-2.14048
RNASE1_Pre-osteoclast	RNASE1	Pre-osteoclast	Ligand	0.280983	0.314599	0.312349	-1.35598
MMP14_Pre-osteoclast	MMP14	Pre-osteoclast	ECM/Ligand	0.173774	0.215762	-0.1524	-2.3647
DHRS4_Pre-osteoclast	DHRS4	Pre-osteoclast	Ligand	0.0316755	0.120155	-0.645197	-3.7017
DHRS4L2_Pre-osteoclast	DHRS4L2	Pre-osteoclast	Ligand	0.0789496	0.160207	-0.615277	-3.2569
LGALS3_Pre-osteoclast	LGALS3	Pre-osteoclast	ECM/Ligand	0.314686	0.505814	-0.0555977	-1.03887
NPC2_Pre-osteoclast	NPC2	Pre-osteoclast	Ligand	0.433789	0.815891	0.375313	0.0817699
IFI27_Pre-osteoclast	IFI27	Pre-osteoclast	Receptor	0.0957436	0.109819	0.0875601	-3.09889
IFI27L2_Pre-osteoclast	IFI27L2	Pre-osteoclast	Receptor	0.0896384	0.152455	-0.443133	-3.15633
HSP90AA1_Pre-osteoclast	HSP90AA1	Pre-osteoclast	ECM/Ligand	0.60811	0.976744	1.75589	1.72195
GREM1_Pre-osteoclast	GREM1	Pre-osteoclast	Ligand	0.0358111	0.105297	-0.41585	-3.66279
MFAP1_Pre-osteoclast	MFAP1	Pre-osteoclast	ECM/Ligand	0.0243488	0.114341	-0.642611	-3.77064
B2M_Pre-osteoclast	B2M	Pre-osteoclast	Ligand	0.692742	0.999354	2.51918	2.51825
ANXA2_Pre-osteoclast	ANXA2	Pre-osteoclast	ECM/Receptor/Ligand	0.588056	0.99031	1.5473	1.53326
PKM_Pre-osteoclast	PKM	Pre-osteoclast	ECM/Ligand	0.552493	0.979328	1.22878	1.19865
NMB_Pre-osteoclast	NMB	Pre-osteoclast	Ligand	0.0539184	0.132429	-0.576158	-3.49242
ANPEP_Pre-osteoclast	ANPEP	Pre-osteoclast	Receptor	0.451807	0.806202	0.562078	0.251297
METRN_Pre-osteoclast	METRN	Pre-osteoclast	Ligand	0.134204	0.205426	-0.453952	-2.73702
TPSAB1_Pre-osteoclast	TPSAB1	Pre-osteoclast	ECM/Ligand	0.0528914	0.0788114	0.16289	-3.50208
GNPTG_Pre-osteoclast	GNPTG	Pre-osteoclast	Ligand	0.0056141	0.100129	-0.627485	-3.94691
NME3_Pre-osteoclast	NME3	Pre-osteoclast	Ligand	0.0843559	0.160853	-0.570203	-3.20604
GFER_Pre-osteoclast	GFER	Pre-osteoclast	Ligand	0.145596	0.249354	-0.626309	-2.62983
NPW_Pre-osteoclast	NPW	Pre-osteoclast	Ligand	0.0332577	0.109173	-0.492032	-3.68682
TNFRSF12A_Pre-osteoclast	TNFRSF12A	Pre-osteoclast	Receptor	0.278803	0.430233	-0.159746	-1.37649
IL32_Pre-osteoclast	IL32	Pre-osteoclast	Ligand	0.00712813	0.0807494	-0.302907	-3.93267
IGSF6_Pre-osteoclast	IGSF6	Pre-osteoclast	Receptor	0.0225348	0.0839793	-0.214466	-3.78771
TMEM219_Pre-osteoclast	TMEM219	Pre-osteoclast	Receptor	0.162307	0.255168	-0.502309	-2.4726
ALDOA_Pre-osteoclast	ALDOA	Pre-osteoclast	Ligand	0.534719	0.96124	1.08844	1.03141
ITGAM_Pre-osteoclast	ITGAM	Pre-osteoclast	Receptor	0.0999248	0.180233	-0.587793	-3.05955
NETO2_Pre-osteoclast	NETO2	Pre-osteoclast	Receptor	0.00697247	0.102713	-0.651456	-3.93413
MMP2_Pre-osteoclast	MMP2	Pre-osteoclast	ECM/Ligand	0.0344205	0.0833333	-0.0914507	-3.67588
CKLF_Pre-osteoclast	CKLF	Pre-osteoclast	Ligand	0.421447	0.749354	0.381916	-0.0343531
CMTM3_Pre-osteoclast	CMTM3	Pre-osteoclast	Ligand	0.112566	0.193152	-0.568701	-2.94061
VAC14_Pre-osteoclast	VAC14	Pre-osteoclast	Receptor	0.0775783	0.161499	-0.639771	-3.26981
GLOD4_Pre-osteoclast	GLOD4	Pre-osteoclast	Ligand	0.141948	0.244186	-0.630422	-2.66415
SERPINF1_Pre-osteoclast	SERPINF1	Pre-osteoclast	ECM/Ligand	0.282977	0.343023	0.206326	-1.33722
ITGAE_Pre-osteoclast	ITGAE	Pre-osteoclast	Receptor	0.179434	0.29522	-0.55147	-2.31145
C1QBP_Pre-osteoclast	C1QBP	Pre-osteoclast	Ligand	0.483159	0.858527	0.766347	0.546287
EVI2A_Pre-osteoclast	EVI2A	Pre-osteoclast	Receptor	0.0538498	0.122093	-0.459572	-3.49307
CCL5_Pre-osteoclast	CCL5	Pre-osteoclast	Ligand	0.251763	0.321059	0.008079	-1.63091
CCL3_Pre-osteoclast	CCL3	Pre-osteoclast	Ligand	0.12316	0.0936693	0.575055	-2.84093
CCL4_Pre-osteoclast	CCL4	Pre-osteoclast	Ligand	0.0402846	0.0691214	0.233497	-3.6207
GRN_Pre-osteoclast	GRN	Pre-osteoclast	Ligand	0.380933	0.666021	0.17079	-0.41555
ABI3_Pre-osteoclast	ABI3	Pre-osteoclast	ECM/Ligand	0.12101	0.197028	-0.517903	-2.86116
COL1A1_Pre-osteoclast	COL1A1	Pre-osteoclast	ECM/Ligand	0.48175	0.368217	1.97438	0.533029
TIMP2_Pre-osteoclast	TIMP2	Pre-osteoclast	ECM/Ligand	0.0985891	0.152455	-0.358896	-3.07212
P4HB_Pre-osteoclast	P4HB	Pre-osteoclast	Receptor	0.291724	0.488372	-0.221026	-1.25492
EMILIN2_Pre-osteoclast	EMILIN2	Pre-osteoclast	ECM/Ligand	0.167781	0.281008	-0.589949	-2.42109
TNFRSF11A_Pre-osteoclast	TNFRSF11A	Pre-osteoclast	Receptor	0.190021	0.31137	-0.528683	-2.21184
CST3_Pre-osteoclast	CST3	Pre-osteoclast	ECM/Ligand	0.58582	0.950258	1.58583	1.51222
SDC4_Pre-osteoclast	SDC4	Pre-osteoclast	Receptor	0.0484173	0.131783	-0.620881	-3.54418
PLTP_Pre-osteoclast	PLTP	Pre-osteoclast	ECM/Ligand	0.257921	0.375323	-0.159257	-1.57297
MMP9_Pre-osteoclast	MMP9	Pre-osteoclast	ECM/Ligand	0.746913	0.957364	3.09079	3.02793
OGFR_Pre-osteoclast	OGFR	Pre-osteoclast	Receptor	0.094417	0.176357	-0.608264	-3.11137
BSG_Pre-osteoclast	BSG	Pre-osteoclast	Receptor	0.314567	0.580749	-0.256017	-1.03999
C19orf10_Pre-osteoclast	C19orf10	Pre-osteoclast	Ligand	0.460799	0.851421	0.567949	0.335899
CD320_Pre-osteoclast	CD320	Pre-osteoclast	Receptor	0.0450295	0.129845	-0.631394	-3.57606
HNRNPM_Pre-osteoclast	HNRNPM	Pre-osteoclast	ECM/Ligand	0.349871	0.680233	-0.151935	-0.707811
ICAM1_Pre-osteoclast	ICAM1	Pre-osteoclast	Ligand	0.257765	0.421189	-0.327056	-1.57444
TMED1_Pre-osteoclast	TMED1	Pre-osteoclast	Receptor	0.0633089	0.143411	-0.602708	-3.40407
RPSAP58_Pre-osteoclast	RPSAP58	Pre-osteoclast	Receptor	0.110722	0.200904	-0.642825	-2.95796
GPI_Pre-osteoclast	GPI	Pre-osteoclast	Ligand	0.1452	0.244832	-0.603632	-2.63355
HCST_Pre-osteoclast	HCST	Pre-osteoclast	Receptor	0.132495	0.195736	-0.400326	-2.75309
TYROBP_Pre-osteoclast	TYROBP	Pre-osteoclast	Ligand	0.502204	0.899871	0.877689	0.725482
PLAUR_Pre-osteoclast	PLAUR	Pre-osteoclast	Receptor	0.115673	0.152455	-0.19812	-2.91137
PVRL2_Pre-osteoclast	PVRL2	Pre-osteoclast	Receptor	0.128889	0.207364	-0.517512	-2.78702
APOE_Pre-osteoclast	APOE	Pre-osteoclast	ECM/Ligand	0.546361	0.608527	1.85755	1.14095
APOC1_Pre-osteoclast	APOC1	Pre-osteoclast	Ligand	0.483625	0.542636	1.43261	0.550677
SLC1A5_Pre-osteoclast	SLC1A5	Pre-osteoclast	Receptor	0.210547	0.351421	-0.510105	-2.01871
FCGRT_Pre-osteoclast	FCGRT	Pre-osteoclast	Receptor	0.20309	0.299742	-0.350794	-2.08887
IL4I1_Pre-osteoclast	IL4I1	Pre-osteoclast	Ligand	0.167846	0.23708	-0.344115	-2.42048
CLEC11A_Pre-osteoclast	CLEC11A	Pre-osteoclast	Ligand	0.169718	0.207364	-0.133301	-2.40287
CD33_Pre-osteoclast	CD33	Pre-osteoclast	Receptor	0.142523	0.24031	-0.601932	-2.65874
OSCAR_Pre-osteoclast	OSCAR	Pre-osteoclast	Receptor	0.0694372	0.140827	-0.5188	-3.3464
LILRB2_Pre-osteoclast	LILRB2	Pre-osteoclast	Receptor	0.0152875	0.109173	-0.661178	-3.8559
LILRB4_Pre-osteoclast	LILRB4	Pre-osteoclast	Receptor	0.0712146	0.149225	-0.585633	-3.32968
MIF_Pre-osteoclast	MIF	Pre-osteoclast	Ligand	0.462485	0.853359	0.580533	0.351763
TIMP3_Pre-osteoclast	TIMP3	Pre-osteoclast	ECM/Ligand	0.149165	0.143411	0.205287	-2.59625
MFNG_Pre-osteoclast	MFNG	Pre-osteoclast	Ligand	0.176475	0.295866	-0.582466	-2.33929
LGALS1_Pre-osteoclast	LGALS1	Pre-osteoclast	ECM/Ligand	0.674045	0.99354	2.35167	2.34232
CRELD2_Pre-osteoclast	CRELD2	Pre-osteoclast	ECM/Ligand	0.105207	0.182817	-0.558615	-3.00984
PLXNB2_Pre-osteoclast	PLXNB2	Pre-osteoclast	Receptor	0.148046	0.220284	-0.424437	-2.60678
APP_Pre-osteoclast	APP	Pre-osteoclast	Receptor/Ligand	0.0887025	0.155039	-0.476187	-3.16514
SOD1_Pre-osteoclast	SOD1	Pre-osteoclast	ECM/Ligand	0.31356	0.601421	-0.315949	-1.04946
IFNAR1_Pre-osteoclast	IFNAR1	Pre-osteoclast	Receptor	0.0887693	0.173127	-0.634749	-3.16451
IFNGR2_Pre-osteoclast	IFNGR2	Pre-osteoclast	Receptor	0.193555	0.307494	-0.477353	-2.17858
ITGB2_Pre-osteoclast	ITGB2	Pre-osteoclast	Receptor	0.282098	0.455426	-0.210841	-1.34549
COL6A1_Pre-osteoclast	COL6A1	Pre-osteoclast	ECM/Ligand	0.249944	0.242894	0.393473	-1.64802
COL6A2_Pre-osteoclast	COL6A2	Pre-osteoclast	ECM/Ligand	0.287507	0.259044	0.654058	-1.29459
SDF4_Osteoclast	SDF4	Osteoclast	Ligand	0.166313	0.289902	-0.583078	-2.36927
VWA1_Osteoclast	VWA1	Osteoclast	ECM/Ligand	0.123045	0.209121	-0.536101	-2.79344
TNFRSF14_Osteoclast	TNFRSF14	Osteoclast	Receptor	0.249502	0.456026	-0.421003	-1.55374
TNFRSF9_Osteoclast	TNFRSF9	Osteoclast	Receptor	0.0948988	0.180456	-0.599401	-3.06937
AGTRAP_Osteoclast	AGTRAP	Osteoclast	Receptor	0.118717	0.214332	-0.61405	-2.83587
IGSF21_Osteoclast	IGSF21	Osteoclast	Ligand	0.0467068	0.117264	-0.450111	-3.54181
C1QA_Osteoclast	C1QA	Osteoclast	Ligand	0.0175069	0.0931596	-0.404504	-3.82806
PPT1_Osteoclast	PPT1	Osteoclast	ECM/Ligand	0.159489	0.268404	-0.538827	-2.43617
TM2D1_Osteoclast	TM2D1	Osteoclast	Receptor	0.101751	0.193485	-0.632789	-3.0022
LEPR_Osteoclast	LEPR	Osteoclast	Receptor	0.00591177	0.101629	-0.643748	-3.94174
CD58_Osteoclast	CD58	Osteoclast	Receptor	0.290667	0.531596	-0.238636	-1.15019
ECM1_Osteoclast	ECM1	Osteoclast	ECM/Ligand	0.0375558	0.126384	-0.647906	-3.63152
S100A4_Osteoclast	S100A4	Osteoclast	Ligand	0.68271	0.999349	2.69408	2.69314
SLC39A1_Osteoclast	SLC39A1	Osteoclast	Receptor	0.300289	0.585668	-0.284057	-1.05586
APOA1BP_Osteoclast	APOA1BP	Osteoclast	Ligand	0.184902	0.32899	-0.583293	-2.18704
HDGF_Osteoclast	HDGF	Osteoclast	Ligand	0.147352	0.249511	-0.552532	-2.55515
CD84_Osteoclast	CD84	Osteoclast	Receptor	0.417679	0.836482	0.352544	0.0949576
CD48_Osteoclast	CD48	Osteoclast	Receptor	0.100037	0.162215	-0.395285	-3.01899
SLAMF7_Osteoclast	SLAMF7	Osteoclast	Receptor	0.0297071	0.114658	-0.584402	-3.70846
F11R_Osteoclast	F11R	Osteoclast	Receptor	0.00476856	0.103583	-0.68244	-3.95294
FCER1G_Osteoclast	FCER1G	Osteoclast	Receptor	0.449944	0.829967	0.680128	0.41126
CREG1_Osteoclast	CREG1	Osteoclast	Ligand	0.118799	0.218893	-0.643616	-2.83507
XPR1_Osteoclast	XPR1	Osteoclast	Receptor	0.162231	0.273616	-0.539685	-2.40929
TPR_Osteoclast	TPR	Osteoclast	Receptor	0.0410824	0.125733	-0.605866	-3.59695
PTPRC_Osteoclast	PTPRC	Osteoclast	Receptor	0.236561	0.43127	-0.467355	-1.68061
RNPEP_Osteoclast	RNPEP	Osteoclast	Ligand	0.158847	0.279479	-0.603449	-2.44246
ADIPOR1_Osteoclast	ADIPOR1	Osteoclast	Receptor	0.20894	0.387622	-0.58421	-1.95138
PLXNA2_Osteoclast	PLXNA2	Osteoclast	Receptor	0.0220628	0.112704	-0.634567	-3.7834
NENF_Osteoclast	NENF	Osteoclast	Ligand	0.325209	0.65342	-0.197672	-0.811561
HPCAL1_Osteoclast	HPCAL1	Osteoclast	ECM/Ligand	0.0287504	0.115961	-0.610086	-3.71784
POMC_Osteoclast	POMC	Osteoclast	Ligand	0.0676553	0.15114	-0.610795	-3.33644
PRADC1_Osteoclast	PRADC1	Osteoclast	Ligand	0.102875	0.193485	-0.62176	-2.99117
SLC20A1_Osteoclast	SLC20A1	Osteoclast	Receptor	0.0127889	0.0996743	-0.548288	-3.87432
NR4A2_Osteoclast	NR4A2	Osteoclast	Receptor	0.0308546	0.10228	-0.408345	-3.69721
DPP4_Osteoclast	DPP4	Osteoclast	Receptor	0.224136	0.385668	-0.42794	-1.80241
ITGAV_Osteoclast	ITGAV	Osteoclast	ECM/Receptor/Ligand	0.315219	0.602606	-0.178821	-0.9095
TFPI_Osteoclast	TFPI	Osteoclast	Ligand	0.0431814	0.123779	-0.562682	-3.57637
COL3A1_Osteoclast	COL3A1	Osteoclast	ECM/Ligand	0.191526	0.132248	0.796416	-2.1221
NRP2_Osteoclast	NRP2	Osteoclast	Receptor	0.334853	0.642997	-0.0799289	-0.717019
FN1_Osteoclast	FN1	Osteoclast	ECM/Ligand	0.159348	0.117264	0.654403	-2.43755
THRB_Osteoclast	THRB	Osteoclast	Receptor	0.00997394	0.106189	-0.667231	-3.90191
CMTM6_Osteoclast	CMTM6	Osteoclast	Ligand	0.113932	0.203909	-0.58904	-2.88277
GLB1_Osteoclast	GLB1	Osteoclast	Ligand	0.186583	0.327687	-0.561083	-2.17055
CRTAP_Osteoclast	CRTAP	Osteoclast	ECM/Ligand	0.0706881	0.158306	-0.647884	-3.30671
RPSA_Osteoclast	RPSA	Osteoclast	Receptor	0.47498	0.921173	0.775152	0.656698
CCR1_Osteoclast	CCR1	Osteoclast	Receptor	0.184569	0.315309	-0.525279	-2.1903
HYAL1_Osteoclast	HYAL1	Osteoclast	Ligand	0.239827	0.413029	-0.372989	-1.64859
HYAL2_Osteoclast	HYAL2	Osteoclast	Receptor	0.237817	0.435831	-0.470211	-1.66829
MANF_Osteoclast	MANF	Osteoclast	Ligand	0.323333	0.532899	0.0780714	-0.829956
CD47_Osteoclast	CD47	Osteoclast	Receptor	0.0900227	0.171336	-0.572394	-3.11717
TPRA1_Osteoclast	TPRA1	Osteoclast	Receptor	0.0531771	0.138762	-0.629506	-3.47838
PLXND1_Osteoclast	PLXND1	Osteoclast	Receptor	0.145597	0.246906	-0.554594	-2.57236
SUCNR1_Osteoclast	SUCNR1	Osteoclast	Receptor	0.175764	0.293811	-0.509738	-2.27662
TFRC_Osteoclast	TFRC	Osteoclast	Receptor	0.222565	0.314007	-0.146793	-1.81782
DLG1_Osteoclast	DLG1	Osteoclast	ECM/Ligand	0.0313445	0.11987	-0.632471	-3.69241
C4orf48_Osteoclast	C4orf48	Osteoclast	Ligand	0.264449	0.47101	-0.321108	-1.40721
LRPAP1_Osteoclast	LRPAP1	Osteoclast	Receptor	0.21657	0.390879	-0.52148	-1.87658
SPINK2_Osteoclast	SPINK2	Osteoclast	Ligand	0.148395	0.190228	-0.150945	-2.54493
IGFBP7_Osteoclast	IGFBP7	Osteoclast	ECM/Ligand	0.108308	0.167427	-0.359806	-2.93791
IL8_Osteoclast	IL8	Osteoclast	Ligand	0	0.0677524	-0.116792	-3.99969
CXCL3_Osteoclast	CXCL3	Osteoclast	Ligand	0.280915	0.30684	0.458578	-1.24579
CXCL2_Osteoclast	CXCL2	Osteoclast	Ligand	0.0150414	0.0794788	-0.199559	-3.85223
ANTXR2_Osteoclast	ANTXR2	Osteoclast	Receptor	0.0733764	0.159609	-0.633348	-3.28036
IBSP_Osteoclast	IBSP	Osteoclast	Ligand	0.148602	0.0996743	0.783495	-2.5429
SPP1_Osteoclast	SPP1	Osteoclast	ECM/Ligand	0.724428	0.990879	3.11533	3.10211
AIMP1_Osteoclast	AIMP1	Osteoclast	Ligand	0.187963	0.331596	-0.564663	-2.15703
PLA2G12A_Osteoclast	PLA2G12A	Osteoclast	Ligand	0.0160351	0.110749	-0.668446	-3.84249
ANXA5_Osteoclast	ANXA5	Osteoclast	Ligand	0.33914	0.654723	-0.0639693	-0.674987
ITGA2_Osteoclast	ITGA2	Osteoclast	Receptor	0.115513	0.205212	-0.582728	-2.86728
ERBB2IP_Osteoclast	ERBB2IP	Osteoclast	ECM/Ligand	0.0359721	0.12443	-0.640954	-3.64704
F2R_Osteoclast	F2R	Osteoclast	Receptor	0.195265	0.341368	-0.534974	-2.08545
SNX2_Osteoclast	SNX2	Osteoclast	Ligand	0.0666933	0.145928	-0.569605	-3.34587
SIL1_Osteoclast	SIL1	Osteoclast	Ligand	0.116927	0.210423	-0.605051	-2.85342
NR3C1_Osteoclast	NR3C1	Osteoclast	Receptor	0.0898828	0.177199	-0.622308	-3.11854
CSF1R_Osteoclast	CSF1R	Osteoclast	Receptor	0.363701	0.73355	0.0128041	-0.434211
CD74_Osteoclast	CD74	Osteoclast	Receptor	0.414865	0.5557	0.914965	0.0673635
SPARC_Osteoclast	SPARC	Osteoclast	ECM/Ligand	0.2666	0.295765	0.371267	-1.38612
HLA-A_Osteoclast	HLA-A	Osteoclast	Receptor	0.340534	0.562866	0.167782	-0.661322
HLA-E_Osteoclast	HLA-E	Osteoclast	Receptor	0.254238	0.454072	-0.368379	-1.50732
HLA-C_Osteoclast	HLA-C	Osteoclast	Receptor	0.330354	0.614984	-0.0597766	-0.761127
HLA-B_Osteoclast	HLA-B	Osteoclast	Receptor	0.357993	0.601954	0.242081	-0.490167
HLA-DRA_Osteoclast	HLA-DRA	Osteoclast	Receptor	0.231065	0.267752	0.166436	-1.73448
HLA-DRB1_Osteoclast	HLA-DRB1	Osteoclast	Receptor	0.320911	0.506189	0.128516	-0.853696
HLA-DQA1_Osteoclast	HLA-DQA1	Osteoclast	Receptor	0.195456	0.267101	-0.179175	-2.08358
HLA-DQB1_Osteoclast	HLA-DQB1	Osteoclast	Receptor	0.0716739	0.132248	-0.378752	-3.29705
HLA-DPA1_Osteoclast	HLA-DPA1	Osteoclast	Receptor	0.170137	0.219544	-0.144541	-2.33178
C6orf1_Osteoclast	C6orf1	Osteoclast	Ligand	0.0296772	0.121173	-0.664419	-3.70876
VEGFA_Osteoclast	VEGFA	Osteoclast	ECM/Ligand	0.0204253	0.111401	-0.633853	-3.79946
VNN1_Osteoclast	VNN1	Osteoclast	Ligand	0.0997496	0.186319	-0.597965	-3.02181
IGF2R_Osteoclast	IGF2R	Osteoclast	Receptor	0.0970363	0.180456	-0.578442	-3.04841
SLC22A1_Osteoclast	SLC22A1	Osteoclast	Receptor	0.0492846	0.104235	-0.254914	-3.51654
RNASET2_Osteoclast	RNASET2	Osteoclast	Ligand	0.105964	0.188925	-0.557071	-2.96089
FAM20C_Osteoclast	FAM20C	Osteoclast	Ligand	0.0865979	0.162215	-0.527063	-3.15074
GPNMB_Osteoclast	GPNMB	Osteoclast	Receptor	0.21668	0.338762	-0.313958	-1.8755
DBNL_Osteoclast	DBNL	Osteoclast	Ligand	0.246335	0.461238	-0.468444	-1.58479
COL1A2_Osteoclast	COL1A2	Osteoclast	ECM/Ligand	0.323483	0.243648	1.20859	-0.828479
DNAJB9_Osteoclast	DNAJB9	Osteoclast	Ligand	0.163937	0.259935	-0.448959	-2.39256
DHRSX_Osteoclast	DHRSX	Osteoclast	Ligand	0.0434698	0.132248	-0.655329	-3.57354
PNPLA4_Osteoclast	PNPLA4	Osteoclast	Ligand	0.0200934	0.113355	-0.662197	-3.80271
GK_Osteoclast	GK	Osteoclast	Ligand	0.0227852	0.0990228	-0.440791	-3.77632
ATP6AP2_Osteoclast	ATP6AP2	Osteoclast	Receptor	0.421844	0.860586	0.35239	0.135788
TIMP1_Osteoclast	TIMP1	Osteoclast	ECM/Ligand	0.162896	0.123779	0.611188	-2.40277
EBP_Osteoclast	EBP	Osteoclast	Receptor	0.184178	0.317915	-0.540989	-2.19413
EFNB1_Osteoclast	EFNB1	Osteoclast	Ligand	0.0537366	0.138762	-0.624018	-3.47289
IL2RG_Osteoclast	IL2RG	Osteoclast	Receptor	0.0976012	0.179805	-0.567686	-3.04287
CYSLTR1_Osteoclast	CYSLTR1	Osteoclast	Receptor	0.0026059	0.0970684	-0.609941	-3.97414
IL13RA1_Osteoclast	IL13RA1	Osteoclast	Receptor	0.194163	0.329642	-0.495345	-2.09624
MSRA_Osteoclast	MSRA	Osteoclast	Ligand	0.0218565	0.115309	-0.669566	-3.78542
CTSB_Osteoclast	CTSB	Osteoclast	ECM/Ligand	0.34126	0.588925	0.109605	-0.654209
ADAM9_Osteoclast	ADAM9	Osteoclast	ECM/Receptor/Ligand	0.0407336	0.130293	-0.660683	-3.60037
LY96_Osteoclast	LY96	Osteoclast	Receptor	0.267526	0.464495	-0.270842	-1.37704
ST3GAL1_Osteoclast	ST3GAL1	Osteoclast	Ligand	0.0711472	0.157655	-0.637433	-3.30221
SLC52A2_Osteoclast	SLC52A2	Osteoclast	Receptor	0.094518	0.180456	-0.603135	-3.0731
STOML2_Osteoclast	STOML2	Osteoclast	Ligand	0.162828	0.285993	-0.597666	-2.40344
TMEM2_Osteoclast	TMEM2	Osteoclast	Receptor	0.0124893	0.104235	-0.615763	-3.87725
ANXA1_Osteoclast	ANXA1	Osteoclast	ECM/Ligand	0.407568	0.713355	0.483125	-0.00416972
SEMA4D_Osteoclast	SEMA4D	Osteoclast	Receptor	0.119959	0.209772	-0.570847	-2.8237
TGFBR1_Osteoclast	TGFBR1	Osteoclast	Receptor	0.0121559	0.102932	-0.600886	-3.88052
ABCA1_Osteoclast	ABCA1	Osteoclast	Receptor	0.0190178	0.111401	-0.647656	-3.81325
COL27A1_Osteoclast	COL27A1	Osteoclast	ECM/Ligand	0.226269	0.400651	-0.462017	-1.7815
GSN_Osteoclast	GSN	Osteoclast	Ligand	0.437451	0.903583	0.435047	0.28878
ENG_Osteoclast	ENG	Osteoclast	Receptor	0.210985	0.36873	-0.492084	-1.93134
FCN1_Osteoclast	FCN1	Osteoclast	Receptor/Ligand	0.080665	0.125081	-0.210216	-3.20891
DPP7_Osteoclast	DPP7	Osteoclast	ECM/Ligand	0.23062	0.426059	-0.508055	-1.73884
BAMBI_Osteoclast	BAMBI	Osteoclast	Receptor	0.311858	0.50684	0.0379058	-0.942447
ITGB1_Osteoclast	ITGB1	Osteoclast	ECM/Receptor/Ligand	0.243232	0.403257	-0.305062	-1.61521
SRGN_Osteoclast	SRGN	Osteoclast	Ligand	0.114738	0.178502	-0.389165	-2.87488
PSAP_Osteoclast	PSAP	Osteoclast	Ligand	0.538257	0.988274	1.29404	1.27702
ANXA7_Osteoclast	ANXA7	Osteoclast	Ligand	0.131781	0.229316	-0.583442	-2.7078
PLAU_Osteoclast	PLAU	Osteoclast	Ligand	0.0890744	0.150489	-0.394532	-3.12647
FAM213A_Osteoclast	FAM213A	Osteoclast	Ligand	0.0453007	0.132899	-0.644463	-3.55559
SMC3_Osteoclast	SMC3	Osteoclast	ECM/Ligand	0.00137582	0.0983713	-0.641241	-3.9862
PTPRE_Osteoclast	PTPRE	Osteoclast	Receptor	0.280612	0.476221	-0.178517	-1.24876
CD151_Osteoclast	CD151	Osteoclast	Ligand	0.146929	0.244951	-0.530066	-2.5593
TSPAN4_Osteoclast	TSPAN4	Osteoclast	Receptor	0.217819	0.37329	-0.44281	-1.86434
CHID1_Osteoclast	CHID1	Osteoclast	Receptor	0.103822	0.194137	-0.617328	-2.98189
CTSD_Osteoclast	CTSD	Osteoclast	ECM/Ligand	0.507722	0.979153	1.00806	0.977671
ADM_Osteoclast	ADM	Osteoclast	Ligand	0.0905102	0.117264	-0.0205703	-3.11239
NUCB2_Osteoclast	NUCB2	Osteoclast	Ligand	0.0935889	0.169381	-0.520876	-3.08221
NAV2_Osteoclast	NAV2	Osteoclast	ECM/Ligand	0.0280058	0.119218	-0.657352	-3.72514
CD44_Osteoclast	CD44	Osteoclast	Receptor	0.198612	0.330945	-0.457417	-2.05263
FJX1_Osteoclast	FJX1	Osteoclast	ECM/Ligand	0.193883	0.306189	-0.391625	-2.09899
HSD17B12_Osteoclast	HSD17B12	Osteoclast	ECM/Ligand	0.161119	0.277524	-0.571049	-2.42019
PTPRJ_Osteoclast	PTPRJ	Osteoclast	Receptor	0.00861294	0.103583	-0.644736	-3.91526
VEGFB_Osteoclast	VEGFB	Osteoclast	Ligand	0.0690605	0.157003	-0.651921	-3.32267
ESRRA_Osteoclast	ESRRA	Osteoclast	Receptor	0.204565	0.360912	-0.524109	-1.99427
AIP_Osteoclast	AIP	Osteoclast	Receptor	0.0655577	0.153746	-0.656026	-3.35701
GAL_Osteoclast	GAL	Osteoclast	Ligand	0.357861	0.421498	0.754898	-0.491466
RELT_Osteoclast	RELT	Osteoclast	Receptor	0.00207403	0.101629	-0.681388	-3.97936
CADM1_Osteoclast	CADM1	Osteoclast	Receptor	0.0794001	0.153094	-0.514162	-3.22131
OAF_Osteoclast	OAF	Osteoclast	Ligand	0.214758	0.380456	-0.500252	-1.89434
CD9_Osteoclast	CD9	Osteoclast	Receptor	0.374787	0.723127	0.142127	-0.325536
CD4_Osteoclast	CD4	Osteoclast	ECM/Receptor/Ligand	0.261134	0.45798	-0.313132	-1.43971
CLEC4E_Osteoclast	CLEC4E	Osteoclast	Receptor	0.110943	0.167427	-0.333973	-2.91208
M6PR_Osteoclast	M6PR	Osteoclast	Receptor	0.217201	0.390228	-0.512893	-1.8704
CLEC2B_Osteoclast	CLEC2B	Osteoclast	Receptor	0.123752	0.207166	-0.51562	-2.78651
CLEC7A_Osteoclast	CLEC7A	Osteoclast	Receptor	0.0174876	0.107492	-0.611136	-3.82825
IGFBP6_Osteoclast	IGFBP6	Osteoclast	Ligand	0.190095	0.261238	-0.199715	-2.13613
ITGA5_Osteoclast	ITGA5	Osteoclast	Receptor	0.190854	0.309446	-0.43659	-2.12869
NCKAP1L_Osteoclast	NCKAP1L	Osteoclast	Receptor	0.146321	0.261238	-0.628893	-2.56526
MMP19_Osteoclast	MMP19	Osteoclast	ECM/Ligand	0.285535	0.476873	-0.132227	-1.20049
LYZ_Osteoclast	LYZ	Osteoclast	Ligand	0.266367	0.390228	-0.0308693	-1.38841
GLIPR1_Osteoclast	GLIPR1	Osteoclast	Ligand	0.330176	0.667101	-0.178872	-0.762869
LUM_Osteoclast	LUM	Osteoclast	ECM/Ligand	0.147676	0.112704	0.59718	-2.55198
DCN_Osteoclast	DCN	Osteoclast	ECM/Ligand	0.154723	0.12443	0.523479	-2.48289
HSP90B1_Osteoclast	HSP90B1	Osteoclast	ECM/Ligand	0.421165	0.736808	0.569756	0.129128
TDG_Osteoclast	TDG	Osteoclast	Ligand	0.129223	0.228013	-0.600303	-2.73288
SELPLG_Osteoclast	SELPLG	Osteoclast	Receptor	0.245712	0.454723	-0.454032	-1.5909
HMGB1_Osteoclast	HMGB1	Osteoclast	Ligand	0.383239	0.729642	0.212049	-0.242676
NHLRC3_Osteoclast	NHLRC3	Osteoclast	Ligand	0.109601	0.201303	-0.612953	-2.92523
GPR183_Osteoclast	GPR183	Osteoclast	Receptor	0.228289	0.343974	-0.222169	-1.7617
PNP_Osteoclast	PNP	Osteoclast	Ligand	0.230912	0.410423	-0.451258	-1.73598
RNASE6_Osteoclast	RNASE6	Osteoclast	Ligand	0.322964	0.608469	-0.116858	-0.83357
RNASE1_Osteoclast	RNASE1	Osteoclast	Ligand	0.289236	0.323127	0.465546	-1.16421
MMP14_Osteoclast	MMP14	Osteoclast	ECM/Ligand	0.294464	0.47101	-0.0268444	-1.11296
DHRS4L2_Osteoclast	DHRS4L2	Osteoclast	Ligand	0.0390003	0.130945	-0.684876	-3.61736
LGALS3_Osteoclast	LGALS3	Osteoclast	ECM/Ligand	0.462871	0.898371	0.692599	0.537986
NPC2_Osteoclast	NPC2	Osteoclast	Ligand	0.559144	0.985016	1.50356	1.48178
IFI27L2_Osteoclast	IFI27L2	Osteoclast	Receptor	0.200182	0.332899	-0.450521	-2.03724
HSP90AA1_Osteoclast	HSP90AA1	Osteoclast	ECM/Ligand	0.49501	0.882736	1.03299	0.85305
B2M_Osteoclast	B2M	Osteoclast	Ligand	0.708848	1	2.94937	2.94937
ANXA2_Osteoclast	ANXA2	Osteoclast	ECM/Receptor/Ligand	0.568522	0.992182	1.58504	1.57372
PKM_Osteoclast	PKM	Osteoclast	ECM/Ligand	0.527643	0.968078	1.21977	1.17296
CD276_Osteoclast	CD276	Osteoclast	Ligand	0.159711	0.267101	-0.529632	-2.43399
SEMA7A_Osteoclast	SEMA7A	Osteoclast	Receptor	0.0364907	0.123779	-0.628295	-3.64196
NMB_Osteoclast	NMB	Osteoclast	Ligand	0.00913513	0.0977199	-0.555554	-3.91014
ANPEP_Osteoclast	ANPEP	Osteoclast	Receptor	0.391812	0.750489	0.255458	-0.158627
METRN_Osteoclast	METRN	Osteoclast	Ligand	0.101587	0.188274	-0.594997	-3.0038
GNPTG_Osteoclast	GNPTG	Osteoclast	Ligand	0.096173	0.187622	-0.643088	-3.05688
NME3_Osteoclast	NME3	Osteoclast	Ligand	0.136051	0.237785	-0.593894	-2.66594
GFER_Osteoclast	GFER	Osteoclast	Ligand	0.0711737	0.161564	-0.672504	-3.30195
TNFRSF12A_Osteoclast	TNFRSF12A	Osteoclast	Receptor	0.383748	0.655375	0.371903	-0.237686
IL32_Osteoclast	IL32	Osteoclast	Ligand	0.252084	0.308795	0.166762	-1.52843
TMEM219_Osteoclast	TMEM219	Osteoclast	Receptor	0.258044	0.490554	-0.442545	-1.47
ALDOA_Osteoclast	ALDOA	Osteoclast	Ligand	0.548879	0.990228	1.39532	1.38115
PRSS36_Osteoclast	PRSS36	Osteoclast	ECM/Ligand	0.0302684	0.121173	-0.658621	-3.70296
ITGAX_Osteoclast	ITGAX	Osteoclast	Receptor	0.0720721	0.150489	-0.561253	-3.29314
CKLF_Osteoclast	CKLF	Osteoclast	Ligand	0.353091	0.682085	0.0137307	-0.538225
CMTM3_Osteoclast	CMTM3	Osteoclast	Ligand	0.126917	0.220195	-0.57258	-2.75548
VAC14_Osteoclast	VAC14	Osteoclast	Receptor	0.176618	0.299674	-0.529872	-2.26825
GLOD4_Osteoclast	GLOD4	Osteoclast	Ligand	0.04368	0.13355	-0.667411	-3.57148
SCARF1_Osteoclast	SCARF1	Osteoclast	Receptor	0.13066	0.229316	-0.59443	-2.71879
SERPINF1_Osteoclast	SERPINF1	Osteoclast	ECM/Ligand	0.209199	0.256026	0.0166568	-1.94885
ITGAE_Osteoclast	ITGAE	Osteoclast	Receptor	0.0150569	0.109446	-0.660968	-3.85208
CXCL16_Osteoclast	CXCL16	Osteoclast	Ligand	0.00151572	0.0990228	-0.649391	-3.98483
C1QBP_Osteoclast	C1QBP	Osteoclast	Ligand	0.371139	0.702932	0.147231	-0.361295
EVI2A_Osteoclast	EVI2A	Osteoclast	Receptor	0.213756	0.344625	-0.367387	-1.90417
CCL5_Osteoclast	CCL5	Osteoclast	Ligand	0.106798	0.137459	-0.0901003	-2.95272
GRN_Osteoclast	GRN	Osteoclast	Ligand	0.542447	0.981107	1.34561	1.31809
ITGB3_Osteoclast	ITGB3	Osteoclast	Receptor	0.115815	0.201954	-0.556683	-2.86431
COL1A1_Osteoclast	COL1A1	Osteoclast	ECM/Ligand	0.37441	0.282736	1.4932	-0.329226
TIMP2_Osteoclast	TIMP2	Osteoclast	ECM/Ligand	0.265903	0.448208	-0.235262	-1.39295
P4HB_Osteoclast	P4HB	Osteoclast	Receptor	0.323905	0.642997	-0.187261	-0.824349
EMILIN2_Osteoclast	EMILIN2	Osteoclast	ECM/Ligand	0.102453	0.192182	-0.616149	-2.99531
PTPRM_Osteoclast	PTPRM	Osteoclast	Receptor	0.00680019	0.105537	-0.68948	-3.93303
NPC1_Osteoclast	NPC1	Osteoclast	Receptor	0.0197232	0.111401	-0.640738	-3.80634
TNFRSF11A_Osteoclast	TNFRSF11A	Osteoclast	Receptor	0.208148	0.370684	-0.52752	-1.95915
CST3_Osteoclast	CST3	Osteoclast	ECM/Ligand	0.793491	0.999349	3.7801	3.77916
EDEM2_Osteoclast	EDEM2	Osteoclast	Ligand	0.0645232	0.153746	-0.666169	-3.36715
SDC4_Osteoclast	SDC4	Osteoclast	Receptor	0.0610917	0.141368	-0.578733	-3.40079
PLTP_Osteoclast	PLTP	Osteoclast	ECM/Ligand	0.0759047	0.143974	-0.459827	-3.25557
MMP9_Osteoclast	MMP9	Osteoclast	ECM/Ligand	0.849116	1	4.32447	4.32447
BSG_Osteoclast	BSG	Osteoclast	Receptor	0.326302	0.661238	-0.204117	-0.800849
C19orf10_Osteoclast	C19orf10	Osteoclast	Ligand	0.456585	0.849511	0.711647	0.476357
MCOLN1_Osteoclast	MCOLN1	Osteoclast	Receptor	0.0131368	0.107492	-0.653805	-3.87091
HNRNPM_Osteoclast	HNRNPM	Osteoclast	ECM/Ligand	0.177503	0.276873	-0.40703	-2.25958
ICAM1_Osteoclast	ICAM1	Osteoclast	Ligand	0.240457	0.427362	-0.416021	-1.64241
TMED1_Osteoclast	TMED1	Osteoclast	Receptor	0.104467	0.196091	-0.625456	-2.97557
RPSAP58_Osteoclast	RPSAP58	Osteoclast	Receptor	0.0559162	0.145928	-0.675287	-3.45153
GPI_Osteoclast	GPI	Osteoclast	Ligand	0.131891	0.241694	-0.658199	-2.70672
TYROBP_Osteoclast	TYROBP	Osteoclast	Ligand	0.572127	0.988925	1.62513	1.60906
LTBP4_Osteoclast	LTBP4	Osteoclast	ECM/Receptor/Ligand	0.0689721	0.156352	-0.646789	-3.32353
PVRL2_Osteoclast	PVRL2	Osteoclast	Receptor	0.157533	0.260586	-0.515367	-2.45535
APOE_Osteoclast	APOE	Osteoclast	ECM/Ligand	0.479858	0.543974	1.58289	0.704516
APOC1_Osteoclast	APOC1	Osteoclast	Ligand	0.368577	0.389577	0.973578	-0.386407
GIPR_Osteoclast	GIPR	Osteoclast	Receptor	0.0135078	0.100326	-0.550635	-3.86727
SLC1A5_Osteoclast	SLC1A5	Osteoclast	Receptor	0.0709771	0.154397	-0.608982	-3.30388
FCGRT_Osteoclast	FCGRT	Osteoclast	Receptor	0.3652	0.70228	0.0903499	-0.419513
NR1H2_Osteoclast	NR1H2	Osteoclast	Receptor	0.051117	0.140065	-0.663189	-3.49857
CLEC11A_Osteoclast	CLEC11A	Osteoclast	Ligand	0.0683569	0.122476	-0.300536	-3.32957
CD33_Osteoclast	CD33	Osteoclast	Receptor	0.241827	0.452117	-0.483832	-1.62899
OSCAR_Osteoclast	OSCAR	Osteoclast	Receptor	0.326115	0.642997	-0.165593	-0.802682
LILRB4_Osteoclast	LILRB4	Osteoclast	Receptor	0.252969	0.442997	-0.345193	-1.51975
A1BG_Osteoclast	A1BG	Osteoclast	Ligand	0.11689	0.210423	-0.605405	-2.85378
DGCR6_Osteoclast	DGCR6	Osteoclast	ECM/Ligand	0.0844408	0.172638	-0.638058	-3.17189
MIF_Osteoclast	MIF	Osteoclast	Ligand	0.35465	0.69772	-0.00368399	-0.522944
TIMP3_Osteoclast	TIMP3	Osteoclast	ECM/Ligand	0.0133838	0.0566775	0.271962	-3.86849
LGALS1_Osteoclast	LGALS1	Osteoclast	ECM/Ligand	0.647522	0.99544	2.35477	2.34818
PDGFB_Osteoclast	PDGFB	Osteoclast	Ligand	0.0286551	0.112704	-0.569917	-3.71878
CRELD2_Osteoclast	CRELD2	Osteoclast	ECM/Ligand	0.175506	0.269055	-0.385286	-2.27915
PLXNB2_Osteoclast	PLXNB2	Osteoclast	Receptor	0.0468068	0.122476	-0.511863	-3.54083
APP_Osteoclast	APP	Osteoclast	Receptor/Ligand	0.167193	0.279479	-0.521625	-2.36064
SOD1_Osteoclast	SOD1	Osteoclast	ECM/Ligand	0.190454	0.32899	-0.528858	-2.13261
IFNAR1_Osteoclast	IFNAR1	Osteoclast	Receptor	0.0361452	0.125081	-0.646789	-3.64535
IFNGR2_Osteoclast	IFNGR2	Osteoclast	Receptor	0.247037	0.420847	-0.329356	-1.57791
ITGB2_Osteoclast	ITGB2	Osteoclast	Receptor	0.164682	0.25342	-0.405045	-2.38526
COL18A1_Osteoclast	COL18A1	Osteoclast	ECM/Ligand	0.0350068	0.122476	-0.627581	-3.65651
COL6A1_Osteoclast	COL6A1	Osteoclast	ECM/Ligand	0.215025	0.247557	0.122304	-1.89174
COL6A2_Osteoclast	COL6A2	Osteoclast	ECM/Ligand	0.309951	0.412378	0.316768	-0.961141
SDF4_Stromal-prot-support	SDF4	Stromal-prot-support	Ligand	0.327551	0.365618	-0.295033	-1.74652
S100A4_Stromal-prot-support	S100A4	Stromal-prot-support	Ligand	0.925182	0.989891	2.25164	2.23698
COL5A2_Stromal-prot-support	COL5A2	Stromal-prot-support	ECM/Ligand	0.697131	0.890333	0.884486	0.716907
COL6A3_Stromal-prot-support	COL6A3	Stromal-prot-support	ECM/Ligand	0.656126	0.782064	0.798221	0.443587
TGFBI_Stromal-prot-support	TGFBI	Stromal-prot-support	ECM/Ligand	0.537313	0.534312	0.555862	-0.348357
SPARC_Stromal-prot-support	SPARC	Stromal-prot-support	ECM/Ligand	1	0.998696	2.73756	2.73568
BGN_Stromal-prot-support	BGN	Stromal-prot-support	ECM/Ligand	0.639006	0.719637	0.804129	0.329479
CTSB_Stromal-prot-support	CTSB	Stromal-prot-support	ECM/Ligand	0.636211	0.813091	0.60935	0.310845
STOML2_Stromal-prot-support	STOML2	Stromal-prot-support	Ligand	0.171239	0.203634	-0.492721	-2.78842
CTSD_Stromal-prot-support	CTSD	Stromal-prot-support	ECM/Ligand	0.437246	0.478919	0.0467473	-1.01535
DKK3_Stromal-prot-support	DKK3	Stromal-prot-support	Ligand	0.0129038	0.0989052	-0.506588	-3.8438
NUCB2_Stromal-prot-support	NUCB2	Stromal-prot-support	Ligand	0.345423	0.358537	-0.147686	-1.6274
NPC2_Stromal-prot-support	NPC2	Stromal-prot-support	Ligand	0.658855	0.870161	0.66242	0.461778
COL6A1_Stromal-prot-support	COL6A1	Stromal-prot-support	ECM/Ligand	0.865792	0.986676	1.86047	1.84112
COL16A1_Stromal-DEG	COL16A1	Stromal-DEG	ECM/Ligand	0.190183	0.536641	0.220058	-0.677879
CYR61_Stromal-DEG	CYR61	Stromal-DEG	ECM/Ligand	0.197708	0.29802	1.12965	-0.616817
VCAM1_Stromal-DEG	VCAM1	Stromal-DEG	Ligand	0.0568043	0.297275	-0.0101872	-1.76021
CSF1_Stromal-DEG	CSF1	Stromal-DEG	Receptor/Ligand	0.0917647	0.391987	-0.12547	-1.47652
OLFML3_Stromal-DEG	OLFML3	Stromal-DEG	Ligand	0.277129	0.659306	0.628632	0.0276675
ITGA10_Stromal-DEG	ITGA10	Stromal-DEG	Receptor	0.180234	0.554717	0.0915338	-0.758608
S100A13_Stromal-DEG	S100A13	Stromal-DEG	Ligand	0.222347	0.617936	0.277576	-0.416871
BGLAP_Stromal-DEG	BGLAP	Stromal-DEG	Ligand	0.200505	0.456324	0.537714	-0.594117
CFH_Stromal-DEG	CFH	Stromal-DEG	Ligand	0.116596	0.447939	-0.116448	-1.27501
EMILIN1_Stromal-DEG	EMILIN1	Stromal-DEG	ECM/Ligand	0.179389	0.552248	0.0911105	-0.765467
ANTXR1_Stromal-DEG	ANTXR1	Stromal-DEG	Receptor	0.0777487	0.379036	-0.190742	-1.59025
FAP_Stromal-DEG	FAP	Stromal-DEG	ECM/Ligand	0.0233756	0.30813	-0.333213	-2.03147
COL3A1_Stromal-DEG	COL3A1	Stromal-DEG	ECM/Ligand	0.629949	0.99222	2.90198	2.89071
COL5A2_Stromal-DEG	COL5A2	Stromal-DEG	ECM/Ligand	0.362066	0.890333	0.884486	0.716907
FN1_Stromal-DEG	FN1	Stromal-DEG	ECM/Ligand	0.607435	0.996506	2.71307	2.70802
SERPINE2_Stromal-DEG	SERPINE2	Stromal-DEG	ECM/Ligand	0.291573	0.652318	0.761212	0.144873
COL6A3_Stromal-DEG	COL6A3	Stromal-DEG	ECM/Ligand	0.328384	0.782064	0.798221	0.443587
GPC1_Stromal-DEG	GPC1	Stromal-DEG	ECM/Ligand	0.0188656	0.280922	-0.236455	-2.06807
PTH1R_Stromal-DEG	PTH1R	Stromal-DEG	Receptor	0.219476	0.549499	0.423608	-0.440175
LAMB2_Stromal-DEG	LAMB2	Stromal-DEG	ECM/Ligand	0.0942806	0.394037	-0.112578	-1.4561
CCDC80_Stromal-DEG	CCDC80	Stromal-DEG	ECM/Ligand	0.311926	0.797298	0.636839	0.310038
FSTL1_Stromal-DEG	FSTL1	Stromal-DEG	Ligand	0.14919	0.482553	0.0406648	-1.01053
ITGB5_Stromal-DEG	ITGB5	Stromal-DEG	Receptor	0.149746	0.49993	-0.00585415	-1.00601
TNFSF10_Stromal-DEG	TNFSF10	Stromal-DEG	Ligand	0.0997854	0.364034	0.0463462	-1.41143
IGFBP7_Stromal-DEG	IGFBP7	Stromal-DEG	ECM/Ligand	0.243522	0.516282	0.708693	-0.245049
IBSP_Stromal-DEG	IBSP	Stromal-DEG	Ligand	0.604542	0.941626	2.77131	2.68454
SPP1_Stromal-DEG	SPP1	Stromal-DEG	ECM/Ligand	0.556034	0.818635	2.57961	2.2909
CFI_Stromal-DEG	CFI	Stromal-DEG	Receptor	0.0959726	0.404705	-0.137387	-1.44237
VCAN_Stromal-DEG	VCAN	Stromal-DEG	ECM/Ligand	0.121677	0.388307	0.130881	-1.23379
SPOCK1_Stromal-DEG	SPOCK1	Stromal-DEG	ECM/Ligand	0.0135404	0.285535	-0.303164	-2.11128
PDGFRB_Stromal-DEG	PDGFRB	Stromal-DEG	Receptor	0.0241865	0.287584	-0.227085	-2.02489
SPARC_Stromal-DEG	SPARC	Stromal-DEG	ECM/Ligand	0.610844	0.998696	2.73756	2.73568
DST_Stromal-DEG	DST	Stromal-DEG	ECM/Ligand	0.100422	0.414163	-0.134601	-1.40626
LAMA4_Stromal-DEG	LAMA4	Stromal-DEG	ECM/Ligand	0.0750418	0.375402	-0.198812	-1.61222
COL10A1_Stromal-DEG	COL10A1	Stromal-DEG	ECM/Ligand	0.111609	0.297647	0.43276	-1.31548
ENPP1_Stromal-DEG	ENPP1	Stromal-DEG	Receptor	0.118085	0.324295	0.361616	-1.26293
CTGF_Stromal-DEG	CTGF	Stromal-DEG	ECM/Ligand	0.368824	0.669835	1.34986	0.77175
THBS2_Stromal-DEG	THBS2	Stromal-DEG	ECM/Ligand	0.156713	0.437177	0.244183	-0.949478
FAM20C_Stromal-DEG	FAM20C	Stromal-DEG	Ligand	0.146933	0.491405	-0.00387284	-1.02884
SFRP4_Stromal-DEG	SFRP4	Stromal-DEG	Ligand	0.402957	0.728768	1.50519	1.04873
COL1A2_Stromal-DEG	COL1A2	Stromal-DEG	ECM/Ligand	0.73488	0.999674	3.74266	3.74219
PCOLCE_Stromal-DEG	PCOLCE	Stromal-DEG	ECM/Ligand	0.466009	0.987841	1.57802	1.56038
LRRC17_Stromal-DEG	LRRC17	Stromal-DEG	Ligand	0.026175	0.275146	-0.147159	-2.00876
SRPX_Stromal-DEG	SRPX	Stromal-DEG	Ligand	0.0982109	0.377638	-0.0193588	-1.42421
TIMP1_Stromal-DEG	TIMP1	Stromal-DEG	ECM/Ligand	0.601794	0.998742	2.66405	2.66224
BGN_Stromal-DEG	BGN	Stromal-DEG	ECM/Ligand	0.314322	0.719637	0.804129	0.329479
CLU_Stromal-DEG	CLU	Stromal-DEG	ECM/Ligand	0.185397	0.348521	0.803919	-0.716715
FGFR1_Stromal-DEG	FGFR1	Stromal-DEG	Receptor	0.350799	0.866667	0.831927	0.62548
SULF1_Stromal-DEG	SULF1	Stromal-DEG	Ligand	0.119524	0.414675	0.0186255	-1.25126
CTHRC1_Stromal-DEG	CTHRC1	Stromal-DEG	ECM/Ligand	0.18285	0.491451	0.28746	-0.737381
ENPP2_Stromal-DEG	ENPP2	Stromal-DEG	Receptor	0.171064	0.498719	0.170635	-0.833025
OMD_Stromal-DEG	OMD	Stromal-DEG	ECM/Ligand	0.103369	0.37652	0.0267805	-1.38235
TNC_Stromal-DEG	TNC	Stromal-DEG	ECM/Ligand	0.306584	0.691824	0.798196	0.266685
OLFML2A_Stromal-DEG	OLFML2A	Stromal-DEG	ECM/Ligand	0.0606934	0.352248	-0.223412	-1.72865
CERCAM_Stromal-DEG	CERCAM	Stromal-DEG	Receptor	0.0453599	0.338411	-0.290038	-1.85308
COL5A1_Stromal-DEG	COL5A1	Stromal-DEG	ECM/Ligand	0.32329	0.79208	0.738524	0.40225
ITGB1_Stromal-DEG	ITGB1	Stromal-DEG	ECM/Receptor/Ligand	0.239084	0.663359	0.311064	-0.281055
HTRA1_Stromal-DEG	HTRA1	Stromal-DEG	ECM/Ligand	0.312775	0.75304	0.726118	0.316925
CD151_Stromal-DEG	CD151	Stromal-DEG	Ligand	0.191083	0.581179	0.112339	-0.670577
MDK_Stromal-DEG	MDK	Stromal-DEG	Ligand	0.229451	0.542371	0.523391	-0.359229
SERPING1_Stromal-DEG	SERPING1	Stromal-DEG	ECM/Ligand	0.330545	0.811693	0.762107	0.46112
LTBP3_Stromal-DEG	LTBP3	Stromal-DEG	ECM/Receptor/Ligand	0.142393	0.481761	-0.0121172	-1.06568
EFEMP2_Stromal-DEG	EFEMP2	Stromal-DEG	ECM/Ligand	0.104937	0.436245	-0.172904	-1.36963
MMP13_Stromal-DEG	MMP13	Stromal-DEG	ECM/Ligand	0.365045	0.635593	1.39489	0.741079
PDGFD_Stromal-DEG	PDGFD	Stromal-DEG	Ligand	0.0617957	0.329932	-0.12005	-1.71971
THY1_Stromal-DEG	THY1	Stromal-DEG	Receptor	0.218396	0.508922	0.525521	-0.448933
C1S_Stromal-DEG	C1S	Stromal-DEG	Ligand	0.296592	0.731703	0.636263	0.185604
C1R_Stromal-DEG	C1R	Stromal-DEG	Ligand	0.221892	0.616818	0.276497	-0.420563
IGFBP6_Stromal-DEG	IGFBP6	Stromal-DEG	Ligand	0.0699623	0.260144	0.289072	-1.65344
LRP1_Stromal-DEG	LRP1	Stromal-DEG	Receptor	0.177292	0.544514	0.094437	-0.782485
LUM_Stromal-DEG	LUM	Stromal-DEG	ECM/Ligand	0.602349	0.997671	2.67011	2.66675
DCN_Stromal-DEG	DCN	Stromal-DEG	ECM/Ligand	0.616204	0.99795	2.78213	2.77917
MMP14_Stromal-DEG	MMP14	Stromal-DEG	ECM/Ligand	0.193526	0.546471	0.221	-0.65075
LTBP2_Stromal-DEG	LTBP2	Stromal-DEG	ECM/Receptor/Ligand	0.0133908	0.281155	-0.282081	-2.1125
IFI27_Stromal-DEG	IFI27	Stromal-DEG	Receptor	0.324377	0.660424	1.0096	0.411073
IFI27L2_Stromal-DEG	IFI27L2	Stromal-DEG	Receptor	0.170133	0.546378	0.0314163	-0.840576
CRIP2_Stromal-DEG	CRIP2	Stromal-DEG	ECM/Ligand	0.114219	0.421756	-0.0488531	-1.29431
FBN1_Stromal-DEG	FBN1	Stromal-DEG	ECM/Ligand	0.155445	0.491824	0.0639737	-0.959767
FGF7_Stromal-DEG	FGF7	Stromal-DEG	Ligand	0.0386538	0.278546	-0.0636104	-1.9075
ITGA11_Stromal-DEG	ITGA11	Stromal-DEG	Receptor	0.0594956	0.358258	-0.257538	-1.73837
LOXL1_Stromal-DEG	LOXL1	Stromal-DEG	ECM/Ligand	0.0209397	0.279432	-0.211946	-2.05124
ISLR_Stromal-DEG	ISLR	Stromal-DEG	Ligand	0.149906	0.412998	0.271027	-1.00471
KIAA1199_Stromal-DEG	KIAA1199	Stromal-DEG	Ligand	0.0879528	0.31563	0.156156	-1.50745
MFGE8_Stromal-DEG	MFGE8	Stromal-DEG	ECM/Ligand	0.146317	0.483065	0.0158216	-1.03384
TGFB1I1_Stromal-DEG	TGFB1I1	Stromal-DEG	ECM/Ligand	0.00328559	0.283019	-0.373621	-2.1945
MMP2_Stromal-DEG	MMP2	Stromal-DEG	ECM/Ligand	0.298122	0.730398	0.65125	0.198016
SERPINF1_Stromal-DEG	SERPINF1	Stromal-DEG	ECM/Ligand	0.512747	0.948195	2.01639	1.93965
COL1A1_Stromal-DEG	COL1A1	Stromal-DEG	ECM/Ligand	0.789679	1	4.18687	4.18687
TIMP2_Stromal-DEG	TIMP2	Stromal-DEG	ECM/Ligand	0.20877	0.590077	0.233947	-0.527051
LGALS3BP_Stromal-DEG	LGALS3BP	Stromal-DEG	ECM/Receptor/Ligand	0.202265	0.589518	0.182533	-0.579832
P4HB_Stromal-DEG	P4HB	Stromal-DEG	Receptor	0.230562	0.662008	0.244848	-0.350212
WISP2_Stromal-DEG	WISP2	Stromal-DEG	ECM/Ligand	0.109786	0.339064	0.230022	-1.33027
SLPI_Stromal-DEG	SLPI	Stromal-DEG	ECM/Ligand	0.190457	0.264663	1.24207	-0.67565
BSG_Stromal-DEG	BSG	Stromal-DEG	Receptor	0.209072	0.624738	0.154054	-0.524598
NOTCH3_Stromal-DEG	NOTCH3	Stromal-DEG	Receptor	0.0909622	0.381784	-0.093936	-1.48303
MIA_Stromal-DEG	MIA	Stromal-DEG	Ligand	0.0307559	0.291544	-0.1935	-1.97159
TGFB1_Stromal-DEG	TGFB1	Stromal-DEG	ECM/Ligand	0.115115	0.438295	-0.0970726	-1.28704
CLEC11A_Stromal-DEG	CLEC11A	Stromal-DEG	Ligand	0.40038	0.914139	1.15733	1.02782
TIMP3_Stromal-DEG	TIMP3	Stromal-DEG	ECM/Ligand	0.460206	0.902492	1.6613	1.51329
LGALS1_Stromal-DEG	LGALS1	Stromal-DEG	ECM/Ligand	0.673149	0.999953	3.24133	3.24126
FBLN1_Stromal-DEG	FBLN1	Stromal-DEG	ECM/Receptor/Ligand	0.158759	0.405218	0.370303	-0.932876
COL6A1_Stromal-DEG	COL6A1	Stromal-DEG	ECM/Ligand	0.500605	0.986676	1.86047	1.84112
COL6A2_Stromal-DEG	COL6A2	Stromal-DEG	ECM/Ligand	0.516288	0.993338	1.97802	1.96838
TNFRSF14_Osteoclast-deg	TNFRSF14	Osteoclast-deg	Receptor	0.131979	0.456026	-0.421003	-1.55374
CD58_Osteoclast-deg	CD58	Osteoclast-deg	Receptor	0.191571	0.531596	-0.238636	-1.15019
S100A4_Osteoclast-deg	S100A4	Osteoclast-deg	Ligand	0.759106	0.999349	2.69408	2.69314
SLC39A1_Osteoclast-deg	SLC39A1	Osteoclast-deg	Receptor	0.2055	0.585668	-0.284057	-1.05586
CD84_Osteoclast-deg	CD84	Osteoclast-deg	Receptor	0.375439	0.836482	0.352544	0.0949576
FCER1G_Osteoclast-deg	FCER1G	Osteoclast-deg	Receptor	0.422146	0.829967	0.680128	0.41126
PTPRC_Osteoclast-deg	PTPRC	Osteoclast-deg	Receptor	0.113246	0.43127	-0.467355	-1.68061
DPP4_Osteoclast-deg	DPP4	Osteoclast-deg	Receptor	0.0952589	0.385668	-0.42794	-1.80241
ITGAV_Osteoclast-deg	ITGAV	Osteoclast-deg	ECM/Receptor/Ligand	0.227113	0.602606	-0.178821	-0.9095
NRP2_Osteoclast-deg	NRP2	Osteoclast-deg	Receptor	0.255536	0.642997	-0.0799289	-0.717019
RPSA_Osteoclast-deg	RPSA	Osteoclast-deg	Receptor	0.45839	0.921173	0.775152	0.656698
CCR1_Osteoclast-deg	CCR1	Osteoclast-deg	Receptor	0.037981	0.315309	-0.525279	-2.1903
HYAL1_Osteoclast-deg	HYAL1	Osteoclast-deg	Ligand	0.117974	0.413029	-0.372989	-1.64859
HYAL2_Osteoclast-deg	HYAL2	Osteoclast-deg	Receptor	0.115064	0.435831	-0.470211	-1.66829
MANF_Osteoclast-deg	MANF	Osteoclast-deg	Ligand	0.238859	0.532899	0.0780714	-0.829956
SUCNR1_Osteoclast-deg	SUCNR1	Osteoclast-deg	Receptor	0.0252337	0.293811	-0.509738	-2.27662
TFRC_Osteoclast-deg	TFRC	Osteoclast-deg	Receptor	0.0929841	0.314007	-0.146793	-1.81782
CXCL3_Osteoclast-deg	CXCL3	Osteoclast-deg	Ligand	0.177454	0.30684	0.458578	-1.24579
SPP1_Osteoclast-deg	SPP1	Osteoclast-deg	ECM/Ligand	0.819498	0.990879	3.11533	3.10211
CSF1R_Osteoclast-deg	CSF1R	Osteoclast-deg	Receptor	0.297298	0.73355	0.0128041	-0.434211
HLA-DQA1_Osteoclast-deg	HLA-DQA1	Osteoclast-deg	Receptor	0.0537401	0.267101	-0.179175	-2.08358
ATP6AP2_Osteoclast-deg	ATP6AP2	Osteoclast-deg	Receptor	0.381468	0.860586	0.35239	0.135788
LY96_Osteoclast-deg	LY96	Osteoclast-deg	Receptor	0.158072	0.464495	-0.270842	-1.37704
GSN_Osteoclast-deg	GSN	Osteoclast-deg	Ligand	0.40406	0.903583	0.435047	0.28878
BAMBI_Osteoclast-deg	BAMBI	Osteoclast-deg	Receptor	0.222248	0.50684	0.0379058	-0.942447
PSAP_Osteoclast-deg	PSAP	Osteoclast-deg	Ligand	0.549991	0.988274	1.29404	1.27702
PTPRE_Osteoclast-deg	PTPRE	Osteoclast-deg	Receptor	0.177016	0.476221	-0.178517	-1.24876
CTSD_Osteoclast-deg	CTSD	Osteoclast-deg	ECM/Ligand	0.505787	0.979153	1.00806	0.977671
FJX1_Osteoclast-deg	FJX1	Osteoclast-deg	ECM/Ligand	0.0514632	0.306189	-0.391625	-2.09899
ESRRA_Osteoclast-deg	ESRRA	Osteoclast-deg	Receptor	0.0669272	0.360912	-0.524109	-1.99427
GAL_Osteoclast-deg	GAL	Osteoclast-deg	Ligand	0.288843	0.421498	0.754898	-0.491466
OAF_Osteoclast-deg	OAF	Osteoclast-deg	Ligand	0.0816834	0.380456	-0.500252	-1.89434
CD4_Osteoclast-deg	CD4	Osteoclast-deg	ECM/Receptor/Ligand	0.148819	0.45798	-0.313132	-1.43971
M6PR_Osteoclast-deg	M6PR	Osteoclast-deg	Receptor	0.0852189	0.390228	-0.512893	-1.8704
MMP19_Osteoclast-deg	MMP19	Osteoclast-deg	ECM/Ligand	0.184142	0.476873	-0.132227	-1.20049
LYZ_Osteoclast-deg	LYZ	Osteoclast-deg	Ligand	0.156394	0.390228	-0.0308693	-1.38841
GLIPR1_Osteoclast-deg	GLIPR1	Osteoclast-deg	Ligand	0.248766	0.667101	-0.178872	-0.762869
SELPLG_Osteoclast-deg	SELPLG	Osteoclast-deg	Receptor	0.126493	0.454723	-0.454032	-1.5909
GPR183_Osteoclast-deg	GPR183	Osteoclast-deg	Receptor	0.101271	0.343974	-0.222169	-1.7617
PNP_Osteoclast-deg	PNP	Osteoclast-deg	Ligand	0.105068	0.410423	-0.451258	-1.73598
RNASE6_Osteoclast-deg	RNASE6	Osteoclast-deg	Ligand	0.238325	0.608469	-0.116858	-0.83357
RNASE1_Osteoclast-deg	RNASE1	Osteoclast-deg	Ligand	0.1895	0.323127	0.465546	-1.16421
LGALS3_Osteoclast-deg	LGALS3	Osteoclast-deg	ECM/Ligand	0.44086	0.898371	0.692599	0.537986
NPC2_Osteoclast-deg	NPC2	Osteoclast-deg	Ligand	0.580228	0.985016	1.50356	1.48178
PKM_Osteoclast-deg	PKM	Osteoclast-deg	ECM/Ligand	0.534625	0.968078	1.21977	1.17296
ANPEP_Osteoclast-deg	ANPEP	Osteoclast-deg	Receptor	0.337993	0.750489	0.255458	-0.158627
TNFRSF12A_Osteoclast-deg	TNFRSF12A	Osteoclast-deg	Receptor	0.326318	0.655375	0.371903	-0.237686
ALDOA_Osteoclast-deg	ALDOA	Osteoclast-deg	Ligand	0.565368	0.990228	1.39532	1.38115
CKLF_Osteoclast-deg	CKLF	Osteoclast-deg	Ligand	0.281938	0.682085	0.0137307	-0.538225
VAC14_Osteoclast-deg	VAC14	Osteoclast-deg	Receptor	0.0264696	0.299674	-0.529872	-2.26825
C1QBP_Osteoclast-deg	C1QBP	Osteoclast-deg	Ligand	0.308065	0.702932	0.147231	-0.361295
GRN_Osteoclast-deg	GRN	Osteoclast-deg	Ligand	0.556056	0.981107	1.34561	1.31809
TNFRSF11A_Osteoclast-deg	TNFRSF11A	Osteoclast-deg	Receptor	0.0721143	0.370684	-0.52752	-1.95915
CST3_Osteoclast-deg	CST3	Osteoclast-deg	ECM/Ligand	0.919477	0.999349	3.7801	3.77916
MMP9_Osteoclast-deg	MMP9	Osteoclast-deg	ECM/Ligand	1	1	4.32447	4.32447
C19orf10_Osteoclast-deg	C19orf10	Osteoclast-deg	Ligand	0.431759	0.849511	0.711647	0.476357
ICAM1_Osteoclast-deg	ICAM1	Osteoclast-deg	Ligand	0.118886	0.427362	-0.416021	-1.64241
TYROBP_Osteoclast-deg	TYROBP	Osteoclast-deg	Ligand	0.599023	0.988925	1.62513	1.60906
APOC1_Osteoclast-deg	APOC1	Osteoclast-deg	Ligand	0.304357	0.389577	0.973578	-0.386407
CD33_Osteoclast-deg	CD33	Osteoclast-deg	Receptor	0.120868	0.452117	-0.483832	-1.62899
OSCAR_Osteoclast-deg	OSCAR	Osteoclast-deg	Receptor	0.242887	0.642997	-0.165593	-0.802682
LILRB4_Osteoclast-deg	LILRB4	Osteoclast-deg	Receptor	0.136999	0.442997	-0.345193	-1.51975
PPT1_Pre-osteoclast-deg	PPT1	Pre-osteoclast-deg	ECM/Ligand	0.153518	0.456072	-0.377553	-1.51015
HDGF_Pre-osteoclast-deg	HDGF	Pre-osteoclast-deg	Ligand	0.211776	0.567183	-0.345954	-1.16402
CD84_Pre-osteoclast-deg	CD84	Pre-osteoclast-deg	Receptor	0.237533	0.542636	-0.129094	-1.011
PTPRC_Pre-osteoclast-deg	PTPRC	Pre-osteoclast-deg	Receptor	0.10855	0.397933	-0.448002	-1.77731
NRP2_Pre-osteoclast-deg	NRP2	Pre-osteoclast-deg	Receptor	0.309945	0.640827	0.0611882	-0.580781
IGFBP2_Pre-osteoclast-deg	IGFBP2	Pre-osteoclast-deg	Ligand	0.128704	0.283592	0.160438	-1.65757
RPSA_Pre-osteoclast-deg	RPSA	Pre-osteoclast-deg	Receptor	0.588208	0.956718	1.13628	1.07244
MANF_Pre-osteoclast-deg	MANF	Pre-osteoclast-deg	Ligand	0.249469	0.536822	-0.0426345	-0.940079
CXCL3_Pre-osteoclast-deg	CXCL3	Pre-osteoclast-deg	Ligand	0.288657	0.376615	0.701537	-0.707254
CXCL2_Pre-osteoclast-deg	CXCL2	Pre-osteoclast-deg	Ligand	0.141736	0.252584	0.404918	-1.58014
AIMP1_Pre-osteoclast-deg	AIMP1	Pre-osteoclast-deg	Ligand	0.164374	0.498708	-0.441979	-1.44565
HMGB2_Pre-osteoclast-deg	HMGB2	Pre-osteoclast-deg	Ligand	0.41195	0.594315	0.775936	0.0252551
IL7R_Pre-osteoclast-deg	IL7R	Pre-osteoclast-deg	Receptor	0.161811	0.29199	0.315044	-1.46088
CSF1R_Pre-osteoclast-deg	CSF1R	Pre-osteoclast-deg	Receptor	0.276664	0.633075	-0.118989	-0.778512
CD74_Pre-osteoclast-deg	CD74	Pre-osteoclast-deg	Receptor	0.77679	0.931525	2.29518	2.19285
HLA-DRA_Pre-osteoclast-deg	HLA-DRA	Pre-osteoclast-deg	Receptor	0.612972	0.788114	1.56309	1.21957
HLA-DRB1_Pre-osteoclast-deg	HLA-DRB1	Pre-osteoclast-deg	Receptor	0.562131	0.826873	1.19177	0.917513
HLA-DQA1_Pre-osteoclast-deg	HLA-DQA1	Pre-osteoclast-deg	Receptor	0.372611	0.631783	0.454015	-0.208464
HLA-DQB1_Pre-osteoclast-deg	HLA-DQB1	Pre-osteoclast-deg	Receptor	0.352114	0.562661	0.499393	-0.330243
HLA-DPA1_Pre-osteoclast-deg	HLA-DPA1	Pre-osteoclast-deg	Receptor	0.477959	0.657623	1.02208	0.417426
EBP_Pre-osteoclast-deg	EBP	Pre-osteoclast-deg	Receptor	0.1155	0.408269	-0.443701	-1.73602
GGH_Pre-osteoclast-deg	GGH	Pre-osteoclast-deg	Ligand	0.0739899	0.356589	-0.495093	-1.98264
STOML2_Pre-osteoclast-deg	STOML2	Pre-osteoclast-deg	Ligand	0.218343	0.566537	-0.305292	-1.125
FCN1_Pre-osteoclast-deg	FCN1	Pre-osteoclast-deg	Receptor/Ligand	0.315594	0.437339	0.645925	-0.547215
PSAP_Pre-osteoclast-deg	PSAP	Pre-osteoclast-deg	Ligand	0.54172	0.932171	0.89758	0.796248
PLAU_Pre-osteoclast-deg	PLAU	Pre-osteoclast-deg	Ligand	0.0649844	0.277132	-0.184925	-2.03614
ESRRA_Pre-osteoclast-deg	ESRRA	Pre-osteoclast-deg	Receptor	0.0514689	0.335917	-0.542754	-2.11644
GAL_Pre-osteoclast-deg	GAL	Pre-osteoclast-deg	Ligand	0.389153	0.52584	0.817096	-0.110185
CD4_Pre-osteoclast-deg	CD4	Pre-osteoclast-deg	ECM/Receptor/Ligand	0.0841893	0.362403	-0.457823	-1.92204
M6PR_Pre-osteoclast-deg	M6PR	Pre-osteoclast-deg	Receptor	0.131721	0.447028	-0.478166	-1.63965
LYZ_Pre-osteoclast-deg	LYZ	Pre-osteoclast-deg	Ligand	0.362801	0.552972	0.587949	-0.266749
SELPLG_Pre-osteoclast-deg	SELPLG	Pre-osteoclast-deg	Receptor	0.023004	0.292636	-0.512896	-2.28556
HMGB1_Pre-osteoclast-deg	HMGB1	Pre-osteoclast-deg	Ligand	0.635391	0.95478	1.41953	1.35277
GPR183_Pre-osteoclast-deg	GPR183	Pre-osteoclast-deg	Receptor	0.0909124	0.328811	-0.277547	-1.8821
PNP_Pre-osteoclast-deg	PNP	Pre-osteoclast-deg	Ligand	0.180538	0.50323	-0.358963	-1.34962
RNASE6_Pre-osteoclast-deg	RNASE6	Pre-osteoclast-deg	Ligand	0.047423	0.300388	-0.40552	-2.14048
RNASE1_Pre-osteoclast-deg	RNASE1	Pre-osteoclast-deg	Ligand	0.179466	0.314599	0.312349	-1.35598
HSP90AA1_Pre-osteoclast-deg	HSP90AA1	Pre-osteoclast-deg	ECM/Ligand	0.69753	0.976744	1.75589	1.72195
PKM_Pre-osteoclast-deg	PKM	Pre-osteoclast-deg	ECM/Ligand	0.60945	0.979328	1.22878	1.19865
ANPEP_Pre-osteoclast-deg	ANPEP	Pre-osteoclast-deg	Receptor	0.449997	0.806202	0.562078	0.251297
ALDOA_Pre-osteoclast-deg	ALDOA	Pre-osteoclast-deg	Ligand	0.581302	0.96124	1.08844	1.03141
CKLF_Pre-osteoclast-deg	CKLF	Pre-osteoclast-deg	Ligand	0.401917	0.749354	0.381916	-0.0343531
C1QBP_Pre-osteoclast-deg	C1QBP	Pre-osteoclast-deg	Ligand	0.499648	0.858527	0.766347	0.546287
TNFRSF11A_Pre-osteoclast-deg	TNFRSF11A	Pre-osteoclast-deg	Receptor	0.0354127	0.31137	-0.528683	-2.21184
MMP9_Pre-osteoclast-deg	MMP9	Pre-osteoclast-deg	ECM/Ligand	0.917348	0.957364	3.09079	3.02793
C19orf10_Pre-osteoclast-deg	C19orf10	Pre-osteoclast-deg	Ligand	0.464236	0.851421	0.567949	0.335899
HNRNPM_Pre-osteoclast-deg	HNRNPM	Pre-osteoclast-deg	ECM/Ligand	0.288564	0.680233	-0.151935	-0.707811
ICAM1_Pre-osteoclast-deg	ICAM1	Pre-osteoclast-deg	Ligand	0.142697	0.421189	-0.327056	-1.57444
TYROBP_Pre-osteoclast-deg	TYROBP	Pre-osteoclast-deg	Ligand	0.529809	0.899871	0.877689	0.725482
APOC1_Pre-osteoclast-deg	APOC1	Pre-osteoclast-deg	Ligand	0.500387	0.542636	1.43261	0.550677
MIF_Pre-osteoclast-deg	MIF	Pre-osteoclast-deg	Ligand	0.466906	0.853359	0.580533	0.351763
MFNG_Pre-osteoclast-deg	MFNG	Pre-osteoclast-deg	Ligand	0.0139606	0.295866	-0.582466	-2.33929
ITGB2_Pre-osteoclast-deg	ITGB2	Pre-osteoclast-deg	Receptor	0.181233	0.455426	-0.210841	-1.34549
C1QA_Monocytes-deg	C1QA	Monocytes-deg	Ligand	0.290659	0.35097	1.06374	-0.4468
C1QC_Monocytes-deg	C1QC	Monocytes-deg	Ligand	0.202642	0.255144	0.9153	-1.05524
PPT1_Monocytes-deg	PPT1	Monocytes-deg	ECM/Ligand	0.241974	0.610817	-0.0721923	-0.783349
S100A9_Monocytes-deg	S100A9	Monocytes-deg	Ligand	0.386409	0.38448	1.5941	0.215105
S100A8_Monocytes-deg	S100A8	Monocytes-deg	Ligand	0.377719	0.295708	1.91275	0.155029
FCER1A_Monocytes-deg	FCER1A	Monocytes-deg	Receptor	0.437492	0.452087	1.71354	0.568227
CD48_Monocytes-deg	CD48	Monocytes-deg	Receptor	0.0905261	0.36214	-0.365006	-1.83028
FCER1G_Monocytes-deg	FCER1G	Monocytes-deg	Receptor	0.517012	0.890653	1.285	1.11794
FCGR2A_Monocytes-deg	FCGR2A	Monocytes-deg	Receptor	0.127193	0.386243	-0.204479	-1.57681
FCGR2B_Monocytes-deg	FCGR2B	Monocytes-deg	Receptor	0.201393	0.404468	0.241968	-1.06388
PTPRC_Monocytes-deg	PTPRC	Monocytes-deg	Receptor	0.176407	0.510288	-0.266039	-1.2366
IL1R2_Monocytes-deg	IL1R2	Monocytes-deg	Receptor	0.0627827	0.252205	-0.0348731	-2.02207
IL1B_Monocytes-deg	IL1B	Monocytes-deg	Ligand	0.322983	0.469724	0.866734	-0.223353
IL1RN_Monocytes-deg	IL1RN	Monocytes-deg	Ligand	0.0995259	0.266902	0.137436	-1.76807
CXCR4_Monocytes-deg	CXCR4	Monocytes-deg	Receptor	0.193899	0.43739	0.0772714	-1.11568
NR4A2_Monocytes-deg	NR4A2	Monocytes-deg	Receptor	0.243901	0.552028	0.0871238	-0.770027
RPSA_Monocytes-deg	RPSA	Monocytes-deg	Receptor	0.45106	0.914168	0.79149	0.662024
CD86_Monocytes-deg	CD86	Monocytes-deg	Receptor	0.0897702	0.356849	-0.348998	-1.83551
PLSCR1_Monocytes-deg	PLSCR1	Monocytes-deg	ECM/Ligand	0.0683928	0.33157	-0.390791	-1.98329
IL8_Monocytes-deg	IL8	Monocytes-deg	Ligand	0.348072	0.492651	0.971421	-0.0499157
CXCL3_Monocytes-deg	CXCL3	Monocytes-deg	Ligand	0.311151	0.338624	1.25706	-0.305146
CXCL2_Monocytes-deg	CXCL2	Monocytes-deg	Ligand	0.286628	0.397413	0.856586	-0.474663
HMGB2_Monocytes-deg	HMGB2	Monocytes-deg	Ligand	0.160797	0.332158	0.245469	-1.34451
IL7R_Monocytes-deg	IL7R	Monocytes-deg	Receptor	0.110987	0.260435	0.252057	-1.68884
CD14_Monocytes-deg	CD14	Monocytes-deg	Receptor	0.33913	0.531452	0.800233	-0.111732
CSF1R_Monocytes-deg	CSF1R	Monocytes-deg	Receptor	0.13705	0.419165	-0.254337	-1.50867
CD74_Monocytes-deg	CD74	Monocytes-deg	Receptor	0.93456	0.998824	4.00607	4.00437
LY86_Monocytes-deg	LY86	Monocytes-deg	Ligand	0.160794	0.482657	-0.293663	-1.34453
HLA-E_Monocytes-deg	HLA-E	Monocytes-deg	Receptor	0.287769	0.687243	0.0743129	-0.466775
HLA-DRA_Monocytes-deg	HLA-DRA	Monocytes-deg	Receptor	0.840985	0.990594	3.37114	3.3575
HLA-DRB1_Monocytes-deg	HLA-DRB1	Monocytes-deg	Receptor	0.729498	0.986479	2.60645	2.58681
HLA-DQA1_Monocytes-deg	HLA-DQA1	Monocytes-deg	Receptor	0.572096	0.855967	1.7231	1.49872
HLA-DQB1_Monocytes-deg	HLA-DQB1	Monocytes-deg	Receptor	0.644623	0.908877	2.13793	2.00009
HLA-DQA2_Monocytes-deg	HLA-DQA2	Monocytes-deg	Receptor	0.220685	0.390947	0.424386	-0.930517
HLA-DPA1_Monocytes-deg	HLA-DPA1	Monocytes-deg	Receptor	0.713742	0.924162	2.59168	2.4779
IFNGR1_Monocytes-deg	IFNGR1	Monocytes-deg	Receptor	0.165389	0.437978	-0.121761	-1.31277
RNASET2_Monocytes-deg	RNASET2	Monocytes-deg	Ligand	0.284824	0.661964	0.108018	-0.487136
CPVL_Monocytes-deg	CPVL	Monocytes-deg	Ligand	0.35965	0.646091	0.660295	0.0301189
FGL2_Monocytes-deg	FGL2	Monocytes-deg	Ligand	0.170441	0.465021	-0.173273	-1.27785
PILRA_Monocytes-deg	PILRA	Monocytes-deg	Receptor	0.0119	0.27572	-0.515259	-2.37381
NAMPT_Monocytes-deg	NAMPT	Monocytes-deg	Ligand	0.186068	0.462081	-0.0560921	-1.16982
TSPAN33_Monocytes-deg	TSPAN33	Monocytes-deg	Receptor	0.0309399	0.298648	-0.49886	-2.24219
CSF2RA_Monocytes-deg	CSF2RA	Monocytes-deg	Receptor	0.120329	0.392122	-0.273725	-1.62426
CFP_Monocytes-deg	CFP	Monocytes-deg	ECM/Ligand	0.089022	0.318048	-0.188109	-1.84068
IL2RG_Monocytes-deg	IL2RG	Monocytes-deg	Receptor	0.0678615	0.333921	-0.40466	-1.98696
LY96_Monocytes-deg	LY96	Monocytes-deg	Receptor	0.12093	0.400353	-0.299531	-1.6201
GSN_Monocytes-deg	GSN	Monocytes-deg	Ligand	0.353184	0.707231	0.485154	-0.0145785
FCN1_Monocytes-deg	FCN1	Monocytes-deg	Receptor/Ligand	0.445897	0.71017	1.12009	0.626331
SRGN_Monocytes-deg	SRGN	Monocytes-deg	Ligand	0.549579	0.938859	1.43409	1.34307
PSAP_Monocytes-deg	PSAP	Monocytes-deg	Ligand	0.518953	0.937684	1.22418	1.13136
PTPRE_Monocytes-deg	PTPRE	Monocytes-deg	Receptor	0.15438	0.455614	-0.254821	-1.38887
IL18_Monocytes-deg	IL18	Monocytes-deg	Ligand	0.0462934	0.295121	-0.375573	-2.13605
IL10RA_Monocytes-deg	IL10RA	Monocytes-deg	Receptor	0.0392669	0.302175	-0.458231	-2.18463
AMICA1_Monocytes-deg	AMICA1	Monocytes-deg	Receptor	0.244343	0.542622	0.11497	-0.766975
CD4_Monocytes-deg	CD4	Monocytes-deg	ECM/Receptor/Ligand	0.0961944	0.383892	-0.409968	-1.7911
CLEC7A_Monocytes-deg	CLEC7A	Monocytes-deg	Receptor	0.128417	0.427984	-0.344058	-1.56835
NR4A1_Monocytes-deg	NR4A1	Monocytes-deg	Receptor	0.13506	0.39565	-0.1848	-1.52243
LYZ_Monocytes-deg	LYZ	Monocytes-deg	Ligand	0.646104	0.938272	2.10225	2.01032
GLIPR1_Monocytes-deg	GLIPR1	Monocytes-deg	Ligand	0.166927	0.492063	-0.279111	-1.30214
GPR183_Monocytes-deg	GPR183	Monocytes-deg	Receptor	0.34775	0.673133	0.518882	-0.0521383
TNFSF13B_Monocytes-deg	TNFSF13B	Monocytes-deg	Ligand	0.139048	0.422693	-0.252615	-1.49486
RNASE6_Monocytes-deg	RNASE6	Monocytes-deg	Ligand	0.295166	0.573192	0.387241	-0.415642
SERPINA1_Monocytes-deg	SERPINA1	Monocytes-deg	ECM/Ligand	0.234676	0.554968	0.0156887	-0.833799
HSP90AA1_Monocytes-deg	HSP90AA1	Monocytes-deg	ECM/Ligand	0.500037	0.823633	1.28051	1.00059
B2M_Monocytes-deg	B2M	Monocytes-deg	Ligand	0.822186	1	3.22755	3.22755
IGSF6_Monocytes-deg	IGSF6	Monocytes-deg	Receptor	0.259148	0.566725	0.154619	-0.664628
CKLF_Monocytes-deg	CKLF	Monocytes-deg	Ligand	0.327148	0.692534	0.335472	-0.194555
CXCL16_Monocytes-deg	CXCL16	Monocytes-deg	Ligand	0.106862	0.368607	-0.277607	-1.71736
C1QBP_Monocytes-deg	C1QBP	Monocytes-deg	Ligand	0.200919	0.52381	-0.134315	-1.06715
CCL3_Monocytes-deg	CCL3	Monocytes-deg	Ligand	0.49942	0.540858	1.88299	0.996324
CCL4_Monocytes-deg	CCL4	Monocytes-deg	Ligand	0.309081	0.340388	1.23526	-0.319449
GRN_Monocytes-deg	GRN	Monocytes-deg	Ligand	0.363539	0.814815	0.352454	0.0570064
ABI3_Monocytes-deg	ABI3	Monocytes-deg	ECM/Ligand	0.0253706	0.281011	-0.44955	-2.28069
CST3_Monocytes-deg	CST3	Monocytes-deg	ECM/Ligand	0.746287	0.992945	2.71308	2.70287
MMP9_Monocytes-deg	MMP9	Monocytes-deg	ECM/Ligand	0.325864	0.518519	0.744075	-0.203432
CFD_Monocytes-deg	CFD	Monocytes-deg	Ligand	0.0830324	0.29806	-0.135878	-1.88208
HCST_Monocytes-deg	HCST	Monocytes-deg	Receptor	0.291005	0.6408	0.197622	-0.44441
TYROBP_Monocytes-deg	TYROBP	Monocytes-deg	Ligand	0.617312	0.946502	1.89061	1.81129
PLAUR_Monocytes-deg	PLAUR	Monocytes-deg	Receptor	0.359226	0.677837	0.588166	0.0271903
IL4I1_Monocytes-deg	IL4I1	Monocytes-deg	Ligand	0.0682554	0.259847	-0.0401052	-1.98424
CD33_Monocytes-deg	CD33	Monocytes-deg	Receptor	0.00876096	0.268665	-0.499569	-2.39551
FPR1_Monocytes-deg	FPR1	Monocytes-deg	Receptor	0.0230259	0.255144	-0.32645	-2.2969
FPR3_Monocytes-deg	FPR3	Monocytes-deg	Receptor	0.0433902	0.293945	-0.389885	-2.15612
LILRB2_Monocytes-deg	LILRB2	Monocytes-deg	Receptor	0	0.251617	-0.465561	-2.45607
ITGB2_Monocytes-deg	ITGB2	Monocytes-deg	Receptor	0.321996	0.731922	0.220048	-0.230175
C1QA_Macrophages-deg	C1QA	Macrophages-deg	Ligand	0.599003	0.927159	2.30289	2.19378
C1QC_Macrophages-deg	C1QC	Macrophages-deg	Ligand	0.514825	0.87706	1.74121	1.55196
C1QB_Macrophages-deg	C1QB	Macrophages-deg	Ligand	0.490564	0.812129	1.6672	1.36698
S100A9_Macrophages-deg	S100A9	Macrophages-deg	Ligand	0.252415	0.398154	0.87979	-0.448773
CD84_Macrophages-deg	CD84	Macrophages-deg	Receptor	0.133957	0.409031	-0.0622992	-1.35195
FCER1G_Macrophages-deg	FCER1G	Macrophages-deg	Receptor	0.442517	0.867502	1.20571	1.00065
FCGR2A_Macrophages-deg	FCGR2A	Macrophages-deg	Receptor	0.198142	0.491101	0.163288	-0.862579
FCGR3A_Macrophages-deg	FCGR3A	Macrophages-deg	Receptor	0.102338	0.330916	0.00233919	-1.59303
CREG1_Macrophages-deg	CREG1	Macrophages-deg	Ligand	0.16683	0.455504	0.033099	-1.10131
[truncated: 67 more rows]

## Sheet: CCINX_edges
Table S6. Interactions between the stromal and myeloid compartments.
Interaction	nodeA	CellTypeA	nodeB	CellTypeB	edgeWeight
A1BG_Stromal~A2M_Stromal	A1BG_Stromal	Stromal	A2M_Stromal	Stromal	0.199783
A1BG_Stromal~ANXA7_Stromal	A1BG_Stromal	Stromal	ANXA7_Stromal	Stromal	0.142439
A1BG_Stromal~LGALS3_Stromal	A1BG_Stromal	Stromal	LGALS3_Stromal	Stromal	0.256873
A2M_Stromal~ANXA7_Stromal	A2M_Stromal	Stromal	ANXA7_Stromal	Stromal	0.210777
A2M_Stromal~APOD_Stromal	A2M_Stromal	Stromal	APOD_Stromal	Stromal	0.168826
A2M_Stromal~APOE_Stromal	A2M_Stromal	Stromal	APOE_Stromal	Stromal	0.400942
A2M_Stromal~APP_Stromal	A2M_Stromal	Stromal	APP_Stromal	Stromal	0.252525
A2M_Stromal~B2M_Stromal	A2M_Stromal	Stromal	B2M_Stromal	Stromal	0.470725
A2M_Stromal~BSG_Stromal	A2M_Stromal	Stromal	BSG_Stromal	Stromal	0.309694
A2M_Stromal~CD276_Stromal	A2M_Stromal	Stromal	CD276_Stromal	Stromal	0.212027
A2M_Stromal~CD44_Stromal	A2M_Stromal	Stromal	CD44_Stromal	Stromal	0.275353
A2M_Stromal~CLU_Stromal	A2M_Stromal	Stromal	CLU_Stromal	Stromal	0.299985
A2M_Stromal~COL5A1_Stromal	A2M_Stromal	Stromal	COL5A1_Stromal	Stromal	0.356536
A2M_Stromal~CRTAP_Stromal	A2M_Stromal	Stromal	CRTAP_Stromal	Stromal	0.207832
A2M_Stromal~CTSB_Stromal	A2M_Stromal	Stromal	CTSB_Stromal	Stromal	0.351917
A2M_Stromal~CTSD_Stromal	A2M_Stromal	Stromal	CTSD_Stromal	Stromal	0.284893
A2M_Stromal~DPP7_Stromal	A2M_Stromal	Stromal	DPP7_Stromal	Stromal	0.244469
A2M_Stromal~FBN1_Stromal	A2M_Stromal	Stromal	FBN1_Stromal	Stromal	0.287702
A2M_Stromal~IL6ST_Stromal	A2M_Stromal	Stromal	IL6ST_Stromal	Stromal	0.178586
A2M_Stromal~ITGAV_Stromal	A2M_Stromal	Stromal	ITGAV_Stromal	Stromal	0.218269
A2M_Stromal~ITGB1_Stromal	A2M_Stromal	Stromal	ITGB1_Stromal	Stromal	0.322003
A2M_Stromal~LAMC1_Stromal	A2M_Stromal	Stromal	LAMC1_Stromal	Stromal	0.180308
A2M_Stromal~LEPRE1_Stromal	A2M_Stromal	Stromal	LEPRE1_Stromal	Stromal	0.213811
A2M_Stromal~LGALS3_Stromal	A2M_Stromal	Stromal	LGALS3_Stromal	Stromal	0.325211
A2M_Stromal~LGALS3BP_Stromal	A2M_Stromal	Stromal	LGALS3BP_Stromal	Stromal	0.306903
A2M_Stromal~LRP1_Stromal	A2M_Stromal	Stromal	LRP1_Stromal	Stromal	0.296661
A2M_Stromal~LUM_Stromal	A2M_Stromal	Stromal	LUM_Stromal	Stromal	0.470981
A2M_Stromal~M6PR_Stromal	A2M_Stromal	Stromal	M6PR_Stromal	Stromal	0.137325
A2M_Stromal~MFAP2_Stromal	A2M_Stromal	Stromal	MFAP2_Stromal	Stromal	0.156056
A2M_Stromal~MMP13_Stromal	A2M_Stromal	Stromal	MMP13_Stromal	Stromal	0.37366
A2M_Stromal~MMP2_Stromal	A2M_Stromal	Stromal	MMP2_Stromal	Stromal	0.346214
A2M_Stromal~MMP9_Stromal	A2M_Stromal	Stromal	MMP9_Stromal	Stromal	0.294535
A2M_Stromal~PDGFA_Stromal	A2M_Stromal	Stromal	PDGFA_Stromal	Stromal	0.154253
A2M_Stromal~PLXNB2_Stromal	A2M_Stromal	Stromal	PLXNB2_Stromal	Stromal	0.217709
A2M_Stromal~PPT1_Stromal	A2M_Stromal	Stromal	PPT1_Stromal	Stromal	0.176189
A2M_Stromal~PSAP_Stromal	A2M_Stromal	Stromal	PSAP_Stromal	Stromal	0.350217
A2M_Stromal~RPSA_Stromal	A2M_Stromal	Stromal	RPSA_Stromal	Stromal	0.328163
A2M_Stromal~TGFBI_Stromal	A2M_Stromal	Stromal	TGFBI_Stromal	Stromal	0.318601
A2M_Stromal~TIMP1_Stromal	A2M_Stromal	Stromal	TIMP1_Stromal	Stromal	0.470753
ABCA1_Stromal~ANPEP_Stromal	ABCA1_Stromal	Stromal	ANPEP_Stromal	Stromal	0.0431469
ABCA1_Stromal~ERBB2IP_Stromal	ABCA1_Stromal	Stromal	ERBB2IP_Stromal	Stromal	0.0191454
ABCA1_Stromal~NR1H2_Stromal	ABCA1_Stromal	Stromal	NR1H2_Stromal	Stromal	0.0259738
ABCA1_Stromal~PLTP_Stromal	ABCA1_Stromal	Stromal	PLTP_Stromal	Stromal	0.0722872
ABCA1_Stromal~SLC1A5_Stromal	ABCA1_Stromal	Stromal	SLC1A5_Stromal	Stromal	0.0114241
ACAN_Stromal~AGRN_Stromal	ACAN_Stromal	Stromal	AGRN_Stromal	Stromal	0.125862
ACAN_Stromal~BGN_Stromal	ACAN_Stromal	Stromal	BGN_Stromal	Stromal	0.304599
ACAN_Stromal~CD44_Stromal	ACAN_Stromal	Stromal	CD44_Stromal	Stromal	0.227094
ACAN_Stromal~COL10A1_Stromal	ACAN_Stromal	Stromal	COL10A1_Stromal	Stromal	0.221465
ACAN_Stromal~COL11A1_Stromal	ACAN_Stromal	Stromal	COL11A1_Stromal	Stromal	0.208874
ACAN_Stromal~COL12A1_Stromal	ACAN_Stromal	Stromal	COL12A1_Stromal	Stromal	0.112791
ACAN_Stromal~COL15A1_Stromal	ACAN_Stromal	Stromal	COL15A1_Stromal	Stromal	0.102233
ACAN_Stromal~COL16A1_Stromal	ACAN_Stromal	Stromal	COL16A1_Stromal	Stromal	0.253689
ACAN_Stromal~COL18A1_Stromal	ACAN_Stromal	Stromal	COL18A1_Stromal	Stromal	0.107857
ACAN_Stromal~COL1A1_Stromal	ACAN_Stromal	Stromal	COL1A1_Stromal	Stromal	0.499547
ACAN_Stromal~COL1A2_Stromal	ACAN_Stromal	Stromal	COL1A2_Stromal	Stromal	0.477073
ACAN_Stromal~COL3A1_Stromal	ACAN_Stromal	Stromal	COL3A1_Stromal	Stromal	0.434041
ACAN_Stromal~COL5A1_Stromal	ACAN_Stromal	Stromal	COL5A1_Stromal	Stromal	0.308277
ACAN_Stromal~COL5A2_Stromal	ACAN_Stromal	Stromal	COL5A2_Stromal	Stromal	0.32418
ACAN_Stromal~COL6A1_Stromal	ACAN_Stromal	Stromal	COL6A1_Stromal	Stromal	0.380996
ACAN_Stromal~COL6A2_Stromal	ACAN_Stromal	Stromal	COL6A2_Stromal	Stromal	0.387427
ACAN_Stromal~COL8A1_Stromal	ACAN_Stromal	Stromal	COL8A1_Stromal	Stromal	0.150953
ACAN_Stromal~COL8A2_Stromal	ACAN_Stromal	Stromal	COL8A2_Stromal	Stromal	0.143677
ACAN_Stromal~CTSB_Stromal	ACAN_Stromal	Stromal	CTSB_Stromal	Stromal	0.303658
ACAN_Stromal~DCN_Stromal	ACAN_Stromal	Stromal	DCN_Stromal	Stromal	0.428404
ACAN_Stromal~FBLN1_Stromal	ACAN_Stromal	Stromal	FBLN1_Stromal	Stromal	0.240802
ACAN_Stromal~FN1_Stromal	ACAN_Stromal	Stromal	FN1_Stromal	Stromal	0.424808
ACAN_Stromal~GPC1_Stromal	ACAN_Stromal	Stromal	GPC1_Stromal	Stromal	0.18343
ACAN_Stromal~GPC4_Stromal	ACAN_Stromal	Stromal	GPC4_Stromal	Stromal	0.118067
ACAN_Stromal~HAPLN1_Stromal	ACAN_Stromal	Stromal	HAPLN1_Stromal	Stromal	0.141061
ACAN_Stromal~HSPG2_Stromal	ACAN_Stromal	Stromal	HSPG2_Stromal	Stromal	0.129372
ACAN_Stromal~HTRA1_Stromal	ACAN_Stromal	Stromal	HTRA1_Stromal	Stromal	0.303965
ACAN_Stromal~ITGA10_Stromal	ACAN_Stromal	Stromal	ITGA10_Stromal	Stromal	0.249609
ACAN_Stromal~ITGA11_Stromal	ACAN_Stromal	Stromal	ITGA11_Stromal	Stromal	0.200093
ACAN_Stromal~ITGAE_Stromal	ACAN_Stromal	Stromal	ITGAE_Stromal	Stromal	0.123458
ACAN_Stromal~ITGAV_Stromal	ACAN_Stromal	Stromal	ITGAV_Stromal	Stromal	0.17001
ACAN_Stromal~ITGB1_Stromal	ACAN_Stromal	Stromal	ITGB1_Stromal	Stromal	0.273744
ACAN_Stromal~ITGB2_Stromal	ACAN_Stromal	Stromal	ITGB2_Stromal	Stromal	0.122489
ACAN_Stromal~ITGB5_Stromal	ACAN_Stromal	Stromal	ITGB5_Stromal	Stromal	0.237106
ACAN_Stromal~LUM_Stromal	ACAN_Stromal	Stromal	LUM_Stromal	Stromal	0.422722
ACAN_Stromal~MMP13_Stromal	ACAN_Stromal	Stromal	MMP13_Stromal	Stromal	0.325401
ACAN_Stromal~MMP14_Stromal	ACAN_Stromal	Stromal	MMP14_Stromal	Stromal	0.25506
ACAN_Stromal~MMP2_Stromal	ACAN_Stromal	Stromal	MMP2_Stromal	Stromal	0.297955
ACAN_Stromal~MMP9_Stromal	ACAN_Stromal	Stromal	MMP9_Stromal	Stromal	0.246276
ACAN_Stromal~SDC4_Stromal	ACAN_Stromal	Stromal	SDC4_Stromal	Stromal	0.0993947
ACAN_Stromal~SMC3_Stromal	ACAN_Stromal	Stromal	SMC3_Stromal	Stromal	0.15447
ACAN_Stromal~TIMP3_Stromal	ACAN_Stromal	Stromal	TIMP3_Stromal	Stromal	0.364428
ACAN_Stromal~TNC_Stromal	ACAN_Stromal	Stromal	TNC_Stromal	Stromal	0.301426
ACAN_Stromal~TNFAIP6_Stromal	ACAN_Stromal	Stromal	TNFAIP6_Stromal	Stromal	0.123495
ACAN_Stromal~VCAN_Stromal	ACAN_Stromal	Stromal	VCAN_Stromal	Stromal	0.225594
ACVR1_Stromal~BAMBI_Stromal	ACVR1_Stromal	Stromal	BAMBI_Stromal	Stromal	0.0365235
ACVR1_Stromal~BMP1_Stromal	ACVR1_Stromal	Stromal	BMP1_Stromal	Stromal	0.0724169
ACVR1_Stromal~BMP2_Stromal	ACVR1_Stromal	Stromal	BMP2_Stromal	Stromal	0.041651
ACVR1_Stromal~BMP8B_Stromal	ACVR1_Stromal	Stromal	BMP8B_Stromal	Stromal	0.0453543
ACVR1_Stromal~BMPR2_Stromal	ACVR1_Stromal	Stromal	BMPR2_Stromal	Stromal	0.0412173
ACVR1_Stromal~ENG_Stromal	ACVR1_Stromal	Stromal	ENG_Stromal	Stromal	0.0547795
ACVR1_Stromal~GDF15_Stromal	ACVR1_Stromal	Stromal	GDF15_Stromal	Stromal	0.0330107
ACVR1_Stromal~INHBA_Stromal	ACVR1_Stromal	Stromal	INHBA_Stromal	Stromal	0.0775427
ACVR1_Stromal~TGFB1_Stromal	ACVR1_Stromal	Stromal	TGFB1_Stromal	Stromal	0.145537
ACVR1_Stromal~TGFB2_Stromal	ACVR1_Stromal	Stromal	TGFB2_Stromal	Stromal	0.0912355
ACVR1_Stromal~TGFB3_Stromal	ACVR1_Stromal	Stromal	TGFB3_Stromal	Stromal	0.0656496
ACVR1_Stromal~TGFBR1_Stromal	ACVR1_Stromal	Stromal	TGFBR1_Stromal	Stromal	0.0555266
ACVR1_Stromal~TGFBR2_Stromal	ACVR1_Stromal	Stromal	TGFBR2_Stromal	Stromal	0.108814
ADAM17_Stromal~APP_Stromal	ADAM17_Stromal	Stromal	APP_Stromal	Stromal	0.142499
ADAM17_Stromal~DLG1_Stromal	ADAM17_Stromal	Stromal	DLG1_Stromal	Stromal	0.0367235
ADAM17_Stromal~ITGB1_Stromal	ADAM17_Stromal	Stromal	ITGB1_Stromal	Stromal	0.211976
ADAM17_Stromal~JAG1_Stromal	ADAM17_Stromal	Stromal	JAG1_Stromal	Stromal	0.0625614
ADAM17_Stromal~NOTCH2_Stromal	ADAM17_Stromal	Stromal	NOTCH2_Stromal	Stromal	0.104832
ADAM17_Stromal~NOTCH3_Stromal	ADAM17_Stromal	Stromal	NOTCH3_Stromal	Stromal	0.15123
ADAM17_Stromal~PTPRF_Stromal	ADAM17_Stromal	Stromal	PTPRF_Stromal	Stromal	0.0280226
ADAM17_Stromal~TIMP3_Stromal	ADAM17_Stromal	Stromal	TIMP3_Stromal	Stromal	0.30266
ADAM17_Stromal~TNFRSF1A_Stromal	ADAM17_Stromal	Stromal	TNFRSF1A_Stromal	Stromal	0.132072
ADAM17_Stromal~TNFSF11_Stromal	ADAM17_Stromal	Stromal	TNFSF11_Stromal	Stromal	0.072255
ADAM9_Stromal~APP_Stromal	ADAM9_Stromal	Stromal	APP_Stromal	Stromal	0.138493
ADAM9_Stromal~ITGAV_Stromal	ADAM9_Stromal	Stromal	ITGAV_Stromal	Stromal	0.104238
ADAM9_Stromal~ITGB1_Stromal	ADAM9_Stromal	Stromal	ITGB1_Stromal	Stromal	0.207971
ADAM9_Stromal~ITGB5_Stromal	ADAM9_Stromal	Stromal	ITGB5_Stromal	Stromal	0.171333
ADAMTS2_Stromal~COL11A1_Stromal	ADAMTS2_Stromal	Stromal	COL11A1_Stromal	Stromal	0.180837
ADAMTS2_Stromal~COL1A1_Stromal	ADAMTS2_Stromal	Stromal	COL1A1_Stromal	Stromal	0.471509
ADAMTS2_Stromal~COL1A2_Stromal	ADAMTS2_Stromal	Stromal	COL1A2_Stromal	Stromal	0.449036
ADAMTS2_Stromal~COL27A1_Stromal	ADAMTS2_Stromal	Stromal	COL27A1_Stromal	Stromal	0.107409
ADAMTS2_Stromal~COL3A1_Stromal	ADAMTS2_Stromal	Stromal	COL3A1_Stromal	Stromal	0.406003
ADAMTS2_Stromal~COL5A1_Stromal	ADAMTS2_Stromal	Stromal	COL5A1_Stromal	Stromal	0.280239
ADAMTS2_Stromal~COL5A2_Stromal	ADAMTS2_Stromal	Stromal	COL5A2_Stromal	Stromal	0.296142
ADAMTS2_Stromal~COL5A3_Stromal	ADAMTS2_Stromal	Stromal	COL5A3_Stromal	Stromal	0.123838
ADIPOR1_Stromal~ANXA2_Stromal	ADIPOR1_Stromal	Stromal	ANXA2_Stromal	Stromal	0.27286
ADIPOR1_Stromal~ERBB2IP_Stromal	ADIPOR1_Stromal	Stromal	ERBB2IP_Stromal	Stromal	0.0240495
ADIPOR1_Stromal~FN1_Stromal	ADIPOR1_Stromal	Stromal	FN1_Stromal	Stromal	0.344617
ADIPOR1_Stromal~LEPRE1_Stromal	ADIPOR1_Stromal	Stromal	LEPRE1_Stromal	Stromal	0.0853612
ADIPOR1_Stromal~LGALS1_Stromal	ADIPOR1_Stromal	Stromal	LGALS1_Stromal	Stromal	0.371566
ADIPOR1_Stromal~RUNX1_Stromal	ADIPOR1_Stromal	Stromal	RUNX1_Stromal	Stromal	0.0206661
AGRN_Stromal~APP_Stromal	AGRN_Stromal	Stromal	APP_Stromal	Stromal	0.158525
AGRN_Stromal~LRP1_Stromal	AGRN_Stromal	Stromal	LRP1_Stromal	Stromal	0.202661
AGTRAP_Stromal~HMGB1_Stromal	AGTRAP_Stromal	Stromal	HMGB1_Stromal	Stromal	0.263106
AGTRAP_Stromal~TNFRSF1A_Stromal	AGTRAP_Stromal	Stromal	TNFRSF1A_Stromal	Stromal	0.133664
AIMP1_Stromal~APP_Stromal	AIMP1_Stromal	Stromal	APP_Stromal	Stromal	0.184144
AIMP1_Stromal~HLA-B_Stromal	AIMP1_Stromal	Stromal	HLA-B_Stromal	Stromal	0.318055
AIMP1_Stromal~HSP90B1_Stromal	AIMP1_Stromal	Stromal	HSP90B1_Stromal	Stromal	0.249716
AIP_Stromal~HSP90AA1_Stromal	AIP_Stromal	Stromal	HSP90AA1_Stromal	Stromal	0.28271
AIP_Stromal~PLSCR1_Stromal	AIP_Stromal	Stromal	PLSCR1_Stromal	Stromal	0.0562551
ALDOA_Stromal~ANXA1_Stromal	ALDOA_Stromal	Stromal	ANXA1_Stromal	Stromal	0.410501
ALDOA_Stromal~ANXA2_Stromal	ALDOA_Stromal	Stromal	ANXA2_Stromal	Stromal	0.449444
ALDOA_Stromal~ANXA5_Stromal	ALDOA_Stromal	Stromal	ANXA5_Stromal	Stromal	0.368613
ALDOA_Stromal~APOA1BP_Stromal	ALDOA_Stromal	Stromal	APOA1BP_Stromal	Stromal	0.238777
ALDOA_Stromal~APOE_Stromal	ALDOA_Stromal	Stromal	APOE_Stromal	Stromal	0.449076
ALDOA_Stromal~BSG_Stromal	ALDOA_Stromal	Stromal	BSG_Stromal	Stromal	0.357829
ALDOA_Stromal~C19orf10_Stromal	ALDOA_Stromal	Stromal	C19orf10_Stromal	Stromal	0.343002
ALDOA_Stromal~C1QBP_Stromal	ALDOA_Stromal	Stromal	C1QBP_Stromal	Stromal	0.278476
ALDOA_Stromal~CD44_Stromal	ALDOA_Stromal	Stromal	CD44_Stromal	Stromal	0.323487
ALDOA_Stromal~CLU_Stromal	ALDOA_Stromal	Stromal	CLU_Stromal	Stromal	0.348119
ALDOA_Stromal~CTSB_Stromal	ALDOA_Stromal	Stromal	CTSB_Stromal	Stromal	0.400051
ALDOA_Stromal~CTSD_Stromal	ALDOA_Stromal	Stromal	CTSD_Stromal	Stromal	0.333027
ALDOA_Stromal~FN1_Stromal	ALDOA_Stromal	Stromal	FN1_Stromal	Stromal	0.521201
ALDOA_Stromal~GPC4_Stromal	ALDOA_Stromal	Stromal	GPC4_Stromal	Stromal	0.21446
ALDOA_Stromal~HMGB1_Stromal	ALDOA_Stromal	Stromal	HMGB1_Stromal	Stromal	0.419674
ALDOA_Stromal~HMGB2_Stromal	ALDOA_Stromal	Stromal	HMGB2_Stromal	Stromal	0.188743
ALDOA_Stromal~HSP90AA1_Stromal	ALDOA_Stromal	Stromal	HSP90AA1_Stromal	Stromal	0.412598
ALDOA_Stromal~HSP90B1_Stromal	ALDOA_Stromal	Stromal	HSP90B1_Stromal	Stromal	0.366231
ALDOA_Stromal~HSPG2_Stromal	ALDOA_Stromal	Stromal	HSPG2_Stromal	Stromal	0.225765
ALDOA_Stromal~ITGA11_Stromal	ALDOA_Stromal	Stromal	ITGA11_Stromal	Stromal	0.296486
ALDOA_Stromal~ITGAV_Stromal	ALDOA_Stromal	Stromal	ITGAV_Stromal	Stromal	0.266404
ALDOA_Stromal~ITGB1_Stromal	ALDOA_Stromal	Stromal	ITGB1_Stromal	Stromal	0.370137
ALDOA_Stromal~LEPRE1_Stromal	ALDOA_Stromal	Stromal	LEPRE1_Stromal	Stromal	0.261945
ALDOA_Stromal~LGALS1_Stromal	ALDOA_Stromal	Stromal	LGALS1_Stromal	Stromal	0.54815
ALDOA_Stromal~LGALS3BP_Stromal	ALDOA_Stromal	Stromal	LGALS3BP_Stromal	Stromal	0.355037
ALDOA_Stromal~LOX_Stromal	ALDOA_Stromal	Stromal	LOX_Stromal	Stromal	0.193206
ALDOA_Stromal~MIF_Stromal	ALDOA_Stromal	Stromal	MIF_Stromal	Stromal	0.337199
ALDOA_Stromal~MMP2_Stromal	ALDOA_Stromal	Stromal	MMP2_Stromal	Stromal	0.394349
ALDOA_Stromal~P4HB_Stromal	ALDOA_Stromal	Stromal	P4HB_Stromal	Stromal	0.366642
ALDOA_Stromal~PKM_Stromal	ALDOA_Stromal	Stromal	PKM_Stromal	Stromal	0.425504
ALDOA_Stromal~PPT1_Stromal	ALDOA_Stromal	Stromal	PPT1_Stromal	Stromal	0.224324
ALDOA_Stromal~RPSA_Stromal	ALDOA_Stromal	Stromal	RPSA_Stromal	Stromal	0.376297
ALDOA_Stromal~S100A4_Stromal	ALDOA_Stromal	Stromal	S100A4_Stromal	Stromal	0.497395
ALDOA_Stromal~S100A8_Stromal	ALDOA_Stromal	Stromal	S100A8_Stromal	Stromal	0.20861
ALDOA_Stromal~SERPINF1_Stromal	ALDOA_Stromal	Stromal	SERPINF1_Stromal	Stromal	0.482368
ALDOA_Stromal~THBS1_Stromal	ALDOA_Stromal	Stromal	THBS1_Stromal	Stromal	0.203476
ALDOA_Stromal~VCAM1_Stromal	ALDOA_Stromal	Stromal	VCAM1_Stromal	Stromal	0.295382
ANGPTL2_Stromal~NR3C1_Stromal	ANGPTL2_Stromal	Stromal	NR3C1_Stromal	Stromal	0.0901651
ANPEP_Stromal~ENPP1_Stromal	ANPEP_Stromal	Stromal	ENPP1_Stromal	Stromal	0.18076
ANPEP_Stromal~NME3_Stromal	ANPEP_Stromal	Stromal	NME3_Stromal	Stromal	0.158096
ANPEP_Stromal~SLC1A5_Stromal	ANPEP_Stromal	Stromal	SLC1A5_Stromal	Stromal	0.0531582
ANTXR1_Stromal~NR3C1_Stromal	ANTXR1_Stromal	Stromal	NR3C1_Stromal	Stromal	0.199064
ANTXR1_Stromal~PCOLCE_Stromal	ANTXR1_Stromal	Stromal	PCOLCE_Stromal	Stromal	0.402783
ANTXR2_Stromal~LAMB1_Stromal	ANTXR2_Stromal	Stromal	LAMB1_Stromal	Stromal	0.0842064
ANTXR2_Stromal~LAMC1_Stromal	ANTXR2_Stromal	Stromal	LAMC1_Stromal	Stromal	0.0564917
ANXA1_Stromal~ANXA2_Stromal	ANXA1_Stromal	Stromal	ANXA2_Stromal	Stromal	0.495555
ANXA1_Stromal~ANXA5_Stromal	ANXA1_Stromal	Stromal	ANXA5_Stromal	Stromal	0.414725
ANXA1_Stromal~BSG_Stromal	ANXA1_Stromal	Stromal	BSG_Stromal	Stromal	0.40394
ANXA1_Stromal~C19orf10_Stromal	ANXA1_Stromal	Stromal	C19orf10_Stromal	Stromal	0.389113
ANXA1_Stromal~C1QBP_Stromal	ANXA1_Stromal	Stromal	C1QBP_Stromal	Stromal	0.324588
ANXA1_Stromal~CD4_Stromal	ANXA1_Stromal	Stromal	CD4_Stromal	Stromal	0.231758
ANXA1_Stromal~CD44_Stromal	ANXA1_Stromal	Stromal	CD44_Stromal	Stromal	0.369599
ANXA1_Stromal~COL1A1_Stromal	ANXA1_Stromal	Stromal	COL1A1_Stromal	Stromal	0.642052
ANXA1_Stromal~ENPP1_Stromal	ANXA1_Stromal	Stromal	ENPP1_Stromal	Stromal	0.366626
ANXA1_Stromal~FN1_Stromal	ANXA1_Stromal	Stromal	FN1_Stromal	Stromal	0.567312
ANXA1_Stromal~GLG1_Stromal	ANXA1_Stromal	Stromal	GLG1_Stromal	Stromal	0.311467
ANXA1_Stromal~GPC4_Stromal	ANXA1_Stromal	Stromal	GPC4_Stromal	Stromal	0.260572
ANXA1_Stromal~HMGB1_Stromal	ANXA1_Stromal	Stromal	HMGB1_Stromal	Stromal	0.465786
ANXA1_Stromal~HMGB2_Stromal	ANXA1_Stromal	Stromal	HMGB2_Stromal	Stromal	0.234854
ANXA1_Stromal~HSP90AA1_Stromal	ANXA1_Stromal	Stromal	HSP90AA1_Stromal	Stromal	0.45871
ANXA1_Stromal~HSP90B1_Stromal	ANXA1_Stromal	Stromal	HSP90B1_Stromal	Stromal	0.412342
ANXA1_Stromal~HSPG2_Stromal	ANXA1_Stromal	Stromal	HSPG2_Stromal	Stromal	0.271876
ANXA1_Stromal~ITGAV_Stromal	ANXA1_Stromal	Stromal	ITGAV_Stromal	Stromal	0.312515
ANXA1_Stromal~ITGB1_Stromal	ANXA1_Stromal	Stromal	ITGB1_Stromal	Stromal	0.416249
ANXA1_Stromal~ITPR2_Stromal	ANXA1_Stromal	Stromal	ITPR2_Stromal	Stromal	0.268011
ANXA1_Stromal~LGALS1_Stromal	ANXA1_Stromal	Stromal	LGALS1_Stromal	Stromal	0.594262
ANXA1_Stromal~P4HB_Stromal	ANXA1_Stromal	Stromal	P4HB_Stromal	Stromal	0.412754
ANXA1_Stromal~PKM_Stromal	ANXA1_Stromal	Stromal	PKM_Stromal	Stromal	0.471615
ANXA1_Stromal~PTPRD_Stromal	ANXA1_Stromal	Stromal	PTPRD_Stromal	Stromal	0.290203
ANXA1_Stromal~PTPRF_Stromal	ANXA1_Stromal	Stromal	PTPRF_Stromal	Stromal	0.232295
ANXA1_Stromal~RPSA_Stromal	ANXA1_Stromal	Stromal	RPSA_Stromal	Stromal	0.422408
ANXA1_Stromal~S100A8_Stromal	ANXA1_Stromal	Stromal	S100A8_Stromal	Stromal	0.254721
ANXA1_Stromal~VCAM1_Stromal	ANXA1_Stromal	Stromal	VCAM1_Stromal	Stromal	0.341494
ANXA2_Stromal~ANXA5_Stromal	ANXA2_Stromal	Stromal	ANXA5_Stromal	Stromal	0.453668
ANXA2_Stromal~APOA1BP_Stromal	ANXA2_Stromal	Stromal	APOA1BP_Stromal	Stromal	0.323832
ANXA2_Stromal~APOE_Stromal	ANXA2_Stromal	Stromal	APOE_Stromal	Stromal	0.534131
ANXA2_Stromal~APP_Stromal	ANXA2_Stromal	Stromal	APP_Stromal	Stromal	0.385714
ANXA2_Stromal~B2M_Stromal	ANXA2_Stromal	Stromal	B2M_Stromal	Stromal	0.603914
ANXA2_Stromal~C1QBP_Stromal	ANXA2_Stromal	Stromal	C1QBP_Stromal	Stromal	0.363531
ANXA2_Stromal~CD4_Stromal	ANXA2_Stromal	Stromal	CD4_Stromal	Stromal	0.270701
ANXA2_Stromal~CLU_Stromal	ANXA2_Stromal	Stromal	CLU_Stromal	Stromal	0.433174
ANXA2_Stromal~CTSB_Stromal	ANXA2_Stromal	Stromal	CTSB_Stromal	Stromal	0.485105
ANXA2_Stromal~CTSD_Stromal	ANXA2_Stromal	Stromal	CTSD_Stromal	Stromal	0.418081
ANXA2_Stromal~DST_Stromal	ANXA2_Stromal	Stromal	DST_Stromal	Stromal	0.398325
ANXA2_Stromal~ERBB2IP_Stromal	ANXA2_Stromal	Stromal	ERBB2IP_Stromal	Stromal	0.285688
ANXA2_Stromal~FN1_Stromal	ANXA2_Stromal	Stromal	FN1_Stromal	Stromal	0.606255
ANXA2_Stromal~GPC4_Stromal	ANXA2_Stromal	Stromal	GPC4_Stromal	Stromal	0.299515
ANXA2_Stromal~GSN_Stromal	ANXA2_Stromal	Stromal	GSN_Stromal	Stromal	0.437712
ANXA2_Stromal~HLA-B_Stromal	ANXA2_Stromal	Stromal	HLA-B_Stromal	Stromal	0.519625
ANXA2_Stromal~HMGB1_Stromal	ANXA2_Stromal	Stromal	HMGB1_Stromal	Stromal	0.504729
ANXA2_Stromal~HMGB2_Stromal	ANXA2_Stromal	Stromal	HMGB2_Stromal	Stromal	0.273797
ANXA2_Stromal~HNRNPM_Stromal	ANXA2_Stromal	Stromal	HNRNPM_Stromal	Stromal	0.374384
ANXA2_Stromal~HSP90AA1_Stromal	ANXA2_Stromal	Stromal	HSP90AA1_Stromal	Stromal	0.497653
ANXA2_Stromal~HSP90B1_Stromal	ANXA2_Stromal	Stromal	HSP90B1_Stromal	Stromal	0.451285
ANXA2_Stromal~HSPG2_Stromal	ANXA2_Stromal	Stromal	HSPG2_Stromal	Stromal	0.310819
ANXA2_Stromal~HTRA1_Stromal	ANXA2_Stromal	Stromal	HTRA1_Stromal	Stromal	0.485413
ANXA2_Stromal~ITGA11_Stromal	ANXA2_Stromal	Stromal	ITGA11_Stromal	Stromal	0.381541
ANXA2_Stromal~ITGAV_Stromal	ANXA2_Stromal	Stromal	ITGAV_Stromal	Stromal	0.351458
ANXA2_Stromal~ITGB1_Stromal	ANXA2_Stromal	Stromal	ITGB1_Stromal	Stromal	0.455192
ANXA2_Stromal~ITPR2_Stromal	ANXA2_Stromal	Stromal	ITPR2_Stromal	Stromal	0.306954
ANXA2_Stromal~LEPRE1_Stromal	ANXA2_Stromal	Stromal	LEPRE1_Stromal	Stromal	0.347
ANXA2_Stromal~LGALS1_Stromal	ANXA2_Stromal	Stromal	LGALS1_Stromal	Stromal	0.633205
ANXA2_Stromal~LGALS3BP_Stromal	ANXA2_Stromal	Stromal	LGALS3BP_Stromal	Stromal	0.440092
ANXA2_Stromal~LOX_Stromal	ANXA2_Stromal	Stromal	LOX_Stromal	Stromal	0.278261
ANXA2_Stromal~MIF_Stromal	ANXA2_Stromal	Stromal	MIF_Stromal	Stromal	0.422254
ANXA2_Stromal~P4HB_Stromal	ANXA2_Stromal	Stromal	P4HB_Stromal	Stromal	0.451696
ANXA2_Stromal~PKM_Stromal	ANXA2_Stromal	Stromal	PKM_Stromal	Stromal	0.510558
ANXA2_Stromal~PPT1_Stromal	ANXA2_Stromal	Stromal	PPT1_Stromal	Stromal	0.309378
ANXA2_Stromal~RPSA_Stromal	ANXA2_Stromal	Stromal	RPSA_Stromal	Stromal	0.461351
ANXA2_Stromal~RUNX1_Stromal	ANXA2_Stromal	Stromal	RUNX1_Stromal	Stromal	0.282305
ANXA2_Stromal~S100A4_Stromal	ANXA2_Stromal	Stromal	S100A4_Stromal	Stromal	0.58245
ANXA2_Stromal~S100A8_Stromal	ANXA2_Stromal	Stromal	S100A8_Stromal	Stromal	0.293664
ANXA2_Stromal~SERPINF1_Stromal	ANXA2_Stromal	Stromal	SERPINF1_Stromal	Stromal	0.567423
ANXA2_Stromal~THBS1_Stromal	ANXA2_Stromal	Stromal	THBS1_Stromal	Stromal	0.28853
ANXA2_Stromal~VCAM1_Stromal	ANXA2_Stromal	Stromal	VCAM1_Stromal	Stromal	0.380437
ANXA5_Stromal~APOA1BP_Stromal	ANXA5_Stromal	Stromal	APOA1BP_Stromal	Stromal	0.243001
ANXA5_Stromal~APP_Stromal	ANXA5_Stromal	Stromal	APP_Stromal	Stromal	0.304884
ANXA5_Stromal~BSG_Stromal	ANXA5_Stromal	Stromal	BSG_Stromal	Stromal	0.362053
ANXA5_Stromal~C19orf10_Stromal	ANXA5_Stromal	Stromal	C19orf10_Stromal	Stromal	0.347226
ANXA5_Stromal~C1QBP_Stromal	ANXA5_Stromal	Stromal	C1QBP_Stromal	Stromal	0.282701
ANXA5_Stromal~CD44_Stromal	ANXA5_Stromal	Stromal	CD44_Stromal	Stromal	0.327711
ANXA5_Stromal~CLU_Stromal	ANXA5_Stromal	Stromal	CLU_Stromal	Stromal	0.352344
ANXA5_Stromal~COL10A1_Stromal	ANXA5_Stromal	Stromal	COL10A1_Stromal	Stromal	0.322083
ANXA5_Stromal~CRTAP_Stromal	ANXA5_Stromal	Stromal	CRTAP_Stromal	Stromal	0.26019
ANXA5_Stromal~CTSD_Stromal	ANXA5_Stromal	Stromal	CTSD_Stromal	Stromal	0.337251
ANXA5_Stromal~FBN1_Stromal	ANXA5_Stromal	Stromal	FBN1_Stromal	Stromal	0.34006
ANXA5_Stromal~FSTL1_Stromal	ANXA5_Stromal	Stromal	FSTL1_Stromal	Stromal	0.337495
ANXA5_Stromal~HSP90AA1_Stromal	ANXA5_Stromal	Stromal	HSP90AA1_Stromal	Stromal	0.416823
ANXA5_Stromal~HSP90B1_Stromal	ANXA5_Stromal	Stromal	HSP90B1_Stromal	Stromal	0.370455
ANXA5_Stromal~IFNGR2_Stromal	ANXA5_Stromal	Stromal	IFNGR2_Stromal	Stromal	0.269025
ANXA5_Stromal~ITGB1_Stromal	ANXA5_Stromal	Stromal	ITGB1_Stromal	Stromal	0.374361
ANXA5_Stromal~ITGB5_Stromal	ANXA5_Stromal	Stromal	ITGB5_Stromal	Stromal	0.337723
ANXA5_Stromal~LEPRE1_Stromal	ANXA5_Stromal	Stromal	LEPRE1_Stromal	Stromal	0.26617
ANXA5_Stromal~LGALS1_Stromal	ANXA5_Stromal	Stromal	LGALS1_Stromal	Stromal	0.552375
ANXA5_Stromal~LGALS3BP_Stromal	ANXA5_Stromal	Stromal	LGALS3BP_Stromal	Stromal	0.359262
ANXA5_Stromal~P4HB_Stromal	ANXA5_Stromal	Stromal	P4HB_Stromal	Stromal	0.370866
ANXA5_Stromal~PKM_Stromal	ANXA5_Stromal	Stromal	PKM_Stromal	Stromal	0.429728
ANXA5_Stromal~S100A4_Stromal	ANXA5_Stromal	Stromal	S100A4_Stromal	Stromal	0.501619
ANXA7_Stromal~CTSB_Stromal	ANXA7_Stromal	Stromal	CTSB_Stromal	Stromal	0.294573
ANXA7_Stromal~GPI_Stromal	ANXA7_Stromal	Stromal	GPI_Stromal	Stromal	0.0804659
ANXA7_Stromal~LGALS3_Stromal	ANXA7_Stromal	Stromal	LGALS3_Stromal	Stromal	0.267868
ANXA7_Stromal~PKM_Stromal	ANXA7_Stromal	Stromal	PKM_Stromal	Stromal	0.320026
ANXA7_Stromal~SDF4_Stromal	ANXA7_Stromal	Stromal	SDF4_Stromal	Stromal	0.190597
APOA1BP_Stromal~CLU_Stromal	APOA1BP_Stromal	Stromal	CLU_Stromal	Stromal	0.222507
APOA1BP_Stromal~CTSD_Stromal	APOA1BP_Stromal	Stromal	CTSD_Stromal	Stromal	0.207415
APOA1BP_Stromal~HSP90AA1_Stromal	APOA1BP_Stromal	Stromal	HSP90AA1_Stromal	Stromal	0.286986
APOA1BP_Stromal~HSP90B1_Stromal	APOA1BP_Stromal	Stromal	HSP90B1_Stromal	Stromal	0.240619
APOA1BP_Stromal~LEPRE1_Stromal	APOA1BP_Stromal	Stromal	LEPRE1_Stromal	Stromal	0.136333
APOA1BP_Stromal~LGALS3BP_Stromal	APOA1BP_Stromal	Stromal	LGALS3BP_Stromal	Stromal	0.229425
APOA1BP_Stromal~P4HB_Stromal	APOA1BP_Stromal	Stromal	P4HB_Stromal	Stromal	0.24103
APOA1BP_Stromal~PKM_Stromal	APOA1BP_Stromal	Stromal	PKM_Stromal	Stromal	0.299892
APOA1BP_Stromal~S100A4_Stromal	APOA1BP_Stromal	Stromal	S100A4_Stromal	Stromal	0.371783
APOC1_Stromal~APOE_Stromal	APOC1_Stromal	Stromal	APOE_Stromal	Stromal	0.333307
APOC1_Stromal~C1QA_Stromal	APOC1_Stromal	Stromal	C1QA_Stromal	Stromal	0.0808591
APOC1_Stromal~CFH_Stromal	APOC1_Stromal	Stromal	CFH_Stromal	Stromal	0.204134
APOC1_Stromal~CLU_Stromal	APOC1_Stromal	Stromal	CLU_Stromal	Stromal	0.23235
APOC1_Stromal~CST3_Stromal	APOC1_Stromal	Stromal	CST3_Stromal	Stromal	0.348362
APOC1_Stromal~FGFR1_Stromal	APOC1_Stromal	Stromal	FGFR1_Stromal	Stromal	0.300183
APOC1_Stromal~FN1_Stromal	APOC1_Stromal	Stromal	FN1_Stromal	Stromal	0.405431
APOC1_Stromal~GSN_Stromal	APOC1_Stromal	Stromal	GSN_Stromal	Stromal	0.236888
APOC1_Stromal~ITGB5_Stromal	APOC1_Stromal	Stromal	ITGB5_Stromal	Stromal	0.217729
APOC1_Stromal~LTBP4_Stromal	APOC1_Stromal	Stromal	LTBP4_Stromal	Stromal	0.0947258
APOC1_Stromal~SERPING1_Stromal	APOC1_Stromal	Stromal	SERPING1_Stromal	Stromal	0.291876
APOC1_Stromal~SLC1A5_Stromal	APOC1_Stromal	Stromal	SLC1A5_Stromal	Stromal	0.0771429
APOD_Stromal~CLU_Stromal	APOD_Stromal	Stromal	CLU_Stromal	Stromal	0.20069
APOD_Stromal~HPCAL1_Stromal	APOD_Stromal	Stromal	HPCAL1_Stromal	Stromal	0.0887161
APOE_Stromal~APP_Stromal	APOE_Stromal	Stromal	APP_Stromal	Stromal	0.385347
APOE_Stromal~CFH_Stromal	APOE_Stromal	Stromal	CFH_Stromal	Stromal	0.404591
APOE_Stromal~CST3_Stromal	APOE_Stromal	Stromal	CST3_Stromal	Stromal	0.548819
APOE_Stromal~CTSB_Stromal	APOE_Stromal	Stromal	CTSB_Stromal	Stromal	0.484738
APOE_Stromal~CTSD_Stromal	APOE_Stromal	Stromal	CTSD_Stromal	Stromal	0.417714
APOE_Stromal~FN1_Stromal	APOE_Stromal	Stromal	FN1_Stromal	Stromal	0.605888
APOE_Stromal~GSN_Stromal	APOE_Stromal	Stromal	GSN_Stromal	Stromal	0.437344
APOE_Stromal~HLA-DPA1_Stromal	APOE_Stromal	Stromal	HLA-DPA1_Stromal	Stromal	0.358059
APOE_Stromal~HMGB1_Stromal	APOE_Stromal	Stromal	HMGB1_Stromal	Stromal	0.504362
APOE_Stromal~HMGB2_Stromal	APOE_Stromal	Stromal	HMGB2_Stromal	Stromal	0.27343
APOE_Stromal~HSPG2_Stromal	APOE_Stromal	Stromal	HSPG2_Stromal	Stromal	0.310452
APOE_Stromal~HTRA1_Stromal	APOE_Stromal	Stromal	HTRA1_Stromal	Stromal	0.485045
APOE_Stromal~ITGB1_Stromal	APOE_Stromal	Stromal	ITGB1_Stromal	Stromal	0.454824
APOE_Stromal~ITGB5_Stromal	APOE_Stromal	Stromal	ITGB5_Stromal	Stromal	0.418186
APOE_Stromal~LRP1_Stromal	APOE_Stromal	Stromal	LRP1_Stromal	Stromal	0.429483
APOE_Stromal~MIF_Stromal	APOE_Stromal	Stromal	MIF_Stromal	Stromal	0.421887
APOE_Stromal~PKM_Stromal	APOE_Stromal	Stromal	PKM_Stromal	Stromal	0.510191
APOE_Stromal~PLTP_Stromal	APOE_Stromal	Stromal	PLTP_Stromal	Stromal	0.338463
APOE_Stromal~PPT1_Stromal	APOE_Stromal	Stromal	PPT1_Stromal	Stromal	0.309011
APOE_Stromal~S100A8_Stromal	APOE_Stromal	Stromal	S100A8_Stromal	Stromal	0.293297
APOE_Stromal~SERPING1_Stromal	APOE_Stromal	Stromal	SERPING1_Stromal	Stromal	0.492333
APOE_Stromal~SLC1A5_Stromal	APOE_Stromal	Stromal	SLC1A5_Stromal	Stromal	0.2776
APOE_Stromal~VCAM1_Stromal	APOE_Stromal	Stromal	VCAM1_Stromal	Stromal	0.38007
APP_Stromal~BGN_Stromal	APP_Stromal	Stromal	BGN_Stromal	Stromal	0.337263
APP_Stromal~CD58_Stromal	APP_Stromal	Stromal	CD58_Stromal	Stromal	0.138921
APP_Stromal~CD74_Stromal	APP_Stromal	Stromal	CD74_Stromal	Stromal	0.360503
APP_Stromal~CHID1_Stromal	APP_Stromal	Stromal	CHID1_Stromal	Stromal	0.192969
APP_Stromal~CLEC2B_Stromal	APP_Stromal	Stromal	CLEC2B_Stromal	Stromal	0.199025
APP_Stromal~CLU_Stromal	APP_Stromal	Stromal	CLU_Stromal	Stromal	0.284389
APP_Stromal~CMTM3_Stromal	APP_Stromal	Stromal	CMTM3_Stromal	Stromal	0.223998
APP_Stromal~COL18A1_Stromal	APP_Stromal	Stromal	COL18A1_Stromal	Stromal	0.14052
APP_Stromal~COL1A2_Stromal	APP_Stromal	Stromal	COL1A2_Stromal	Stromal	0.509737
APP_Stromal~COLEC12_Stromal	APP_Stromal	Stromal	COLEC12_Stromal	Stromal	0.223045
APP_Stromal~CRIP2_Stromal	APP_Stromal	Stromal	CRIP2_Stromal	Stromal	0.255199
APP_Stromal~CTSB_Stromal	APP_Stromal	Stromal	CTSB_Stromal	Stromal	0.336321
APP_Stromal~CTSD_Stromal	APP_Stromal	Stromal	CTSD_Stromal	Stromal	0.269297
APP_Stromal~CXCL14_Stromal	APP_Stromal	Stromal	CXCL14_Stromal	Stromal	0.298924
APP_Stromal~DHRSX_Stromal	APP_Stromal	Stromal	DHRSX_Stromal	Stromal	0.158821
APP_Stromal~EBP_Stromal	APP_Stromal	Stromal	EBP_Stromal	Stromal	0.123823
APP_Stromal~EPHA2_Stromal	APP_Stromal	Stromal	EPHA2_Stromal	Stromal	0.15765
APP_Stromal~EVI2A_Stromal	APP_Stromal	Stromal	EVI2A_Stromal	Stromal	0.173399
APP_Stromal~FBLN1_Stromal	APP_Stromal	Stromal	FBLN1_Stromal	Stromal	0.273465
APP_Stromal~FGFR2_Stromal	APP_Stromal	Stromal	FGFR2_Stromal	Stromal	0.176688
APP_Stromal~GLOD4_Stromal	APP_Stromal	Stromal	GLOD4_Stromal	Stromal	0.147396
APP_Stromal~GPC1_Stromal	APP_Stromal	Stromal	GPC1_Stromal	Stromal	0.216094
APP_Stromal~GSN_Stromal	APP_Stromal	Stromal	GSN_Stromal	Stromal	0.288927
APP_Stromal~HAPLN1_Stromal	APP_Stromal	Stromal	HAPLN1_Stromal	Stromal	0.173724
APP_Stromal~HDGF_Stromal	APP_Stromal	Stromal	HDGF_Stromal	Stromal	0.187774
APP_Stromal~HLA-A_Stromal	APP_Stromal	Stromal	HLA-A_Stromal	Stromal	0.381646
APP_Stromal~HMGB2_Stromal	APP_Stromal	Stromal	HMGB2_Stromal	Stromal	0.125013
APP_Stromal~HSP90AA1_Stromal	APP_Stromal	Stromal	HSP90AA1_Stromal	Stromal	0.348868
APP_Stromal~HSPG2_Stromal	APP_Stromal	Stromal	HSPG2_Stromal	Stromal	0.162035
APP_Stromal~LAMC1_Stromal	APP_Stromal	Stromal	LAMC1_Stromal	Stromal	0.164712
APP_Stromal~LGALS3_Stromal	APP_Stromal	Stromal	LGALS3_Stromal	Stromal	0.309616
APP_Stromal~LMCD1_Stromal	APP_Stromal	Stromal	LMCD1_Stromal	Stromal	0.151126
APP_Stromal~LRP1_Stromal	APP_Stromal	Stromal	LRP1_Stromal	Stromal	0.281066
APP_Stromal~NID1_Stromal	APP_Stromal	Stromal	NID1_Stromal	Stromal	0.151409
APP_Stromal~NME3_Stromal	APP_Stromal	Stromal	NME3_Stromal	Stromal	0.23412
APP_Stromal~OLFML2A_Stromal	APP_Stromal	Stromal	OLFML2A_Stromal	Stromal	0.233248
APP_Stromal~P4HB_Stromal	APP_Stromal	Stromal	P4HB_Stromal	Stromal	0.302912
APP_Stromal~PCOLCE_Stromal	APP_Stromal	Stromal	PCOLCE_Stromal	Stromal	0.399471
APP_Stromal~PKM_Stromal	APP_Stromal	Stromal	PKM_Stromal	Stromal	0.361774
APP_Stromal~PLSCR1_Stromal	APP_Stromal	Stromal	PLSCR1_Stromal	Stromal	0.122414
APP_Stromal~PTPRG_Stromal	APP_Stromal	Stromal	PTPRG_Stromal	Stromal	0.176685
APP_Stromal~S100A8_Stromal	APP_Stromal	Stromal	S100A8_Stromal	Stromal	0.14488
APP_Stromal~SDF4_Stromal	APP_Stromal	Stromal	SDF4_Stromal	Stromal	0.232344
APP_Stromal~SLC40A1_Stromal	APP_Stromal	Stromal	SLC40A1_Stromal	Stromal	0.231287
APP_Stromal~SOD1_Stromal	APP_Stromal	Stromal	SOD1_Stromal	Stromal	0.266922
APP_Stromal~STOML2_Stromal	APP_Stromal	Stromal	STOML2_Stromal	Stromal	0.179688
APP_Stromal~SULF1_Stromal	APP_Stromal	Stromal	SULF1_Stromal	Stromal	0.257374
APP_Stromal~TFPI_Stromal	APP_Stromal	Stromal	TFPI_Stromal	Stromal	0.2045
APP_Stromal~TGFB1_Stromal	APP_Stromal	Stromal	TGFB1_Stromal	Stromal	0.255566
APP_Stromal~TGFB2_Stromal	APP_Stromal	Stromal	TGFB2_Stromal	Stromal	0.201265
APP_Stromal~TGFBR1_Stromal	APP_Stromal	Stromal	TGFBR1_Stromal	Stromal	0.165556
APP_Stromal~TGFBR2_Stromal	APP_Stromal	Stromal	TGFBR2_Stromal	Stromal	0.218843
APP_Stromal~THBS1_Stromal	APP_Stromal	Stromal	THBS1_Stromal	Stromal	0.139746
APP_Stromal~TM2D1_Stromal	APP_Stromal	Stromal	TM2D1_Stromal	Stromal	0.160505
APP_Stromal~TNFRSF1A_Stromal	APP_Stromal	Stromal	TNFRSF1A_Stromal	Stromal	0.226503
APP_Stromal~TNFSF10_Stromal	APP_Stromal	Stromal	TNFSF10_Stromal	Stromal	0.24928
APP_Stromal~TXLNA_Stromal	APP_Stromal	Stromal	TXLNA_Stromal	Stromal	0.119088
ASPN_Stromal~TGFB1_Stromal	ASPN_Stromal	Stromal	TGFB1_Stromal	Stromal	0.282956
ASPN_Stromal~TGFB2_Stromal	ASPN_Stromal	Stromal	TGFB2_Stromal	Stromal	0.228654
ASPN_Stromal~TGFB3_Stromal	ASPN_Stromal	Stromal	TGFB3_Stromal	Stromal	0.203069
ATP6AP2_Stromal~CTSD_Stromal	ATP6AP2_Stromal	Stromal	CTSD_Stromal	Stromal	0.274741
ATP6AP2_Stromal~LGALS1_Stromal	ATP6AP2_Stromal	Stromal	LGALS1_Stromal	Stromal	0.489865
AXL_Stromal~FGF7_Stromal	AXL_Stromal	Stromal	FGF7_Stromal	Stromal	0.161596
AXL_Stromal~FGF9_Stromal	AXL_Stromal	Stromal	FGF9_Stromal	Stromal	0.0600853
AXL_Stromal~FGFR1_Stromal	AXL_Stromal	Stromal	FGFR1_Stromal	Stromal	0.289609
AXL_Stromal~FGFR2_Stromal	AXL_Stromal	Stromal	FGFR2_Stromal	Stromal	0.114074
AXL_Stromal~HSP90AA1_Stromal	AXL_Stromal	Stromal	HSP90AA1_Stromal	Stromal	0.286255
B2M_Stromal~FAS_Stromal	B2M_Stromal	Stromal	FAS_Stromal	Stromal	0.36926
B2M_Stromal~FCGRT_Stromal	B2M_Stromal	Stromal	FCGRT_Stromal	Stromal	0.505008
B2M_Stromal~FGF7_Stromal	B2M_Stromal	Stromal	FGF7_Stromal	Stromal	0.442409
B2M_Stromal~FGF9_Stromal	B2M_Stromal	Stromal	FGF9_Stromal	Stromal	0.340898
B2M_Stromal~FGFR1_Stromal	B2M_Stromal	Stromal	FGFR1_Stromal	Stromal	0.570422
B2M_Stromal~FGFR2_Stromal	B2M_Stromal	Stromal	FGFR2_Stromal	Stromal	0.394888
B2M_Stromal~HLA-A_Stromal	B2M_Stromal	Stromal	HLA-A_Stromal	Stromal	0.599846
B2M_Stromal~HLA-B_Stromal	B2M_Stromal	Stromal	HLA-B_Stromal	Stromal	0.58904
B2M_Stromal~HLA-C_Stromal	B2M_Stromal	Stromal	HLA-C_Stromal	Stromal	0.577139
B2M_Stromal~HLA-E_Stromal	B2M_Stromal	Stromal	HLA-E_Stromal	Stromal	0.448621
B2M_Stromal~HLA-F_Stromal	B2M_Stromal	Stromal	HLA-F_Stromal	Stromal	0.352244
B2M_Stromal~HSP90AA1_Stromal	B2M_Stromal	Stromal	HSP90AA1_Stromal	Stromal	0.567068
B2M_Stromal~KLRC2_Stromal	B2M_Stromal	Stromal	KLRC2_Stromal	Stromal	0.426005
B2M_Stromal~KLRD1_Stromal	B2M_Stromal	Stromal	KLRD1_Stromal	Stromal	0.349926
B2M_Stromal~LUM_Stromal	B2M_Stromal	Stromal	LUM_Stromal	Stromal	0.673585
B2M_Stromal~P4HB_Stromal	B2M_Stromal	Stromal	P4HB_Stromal	Stromal	0.521112
B2M_Stromal~PCOLCE_Stromal	B2M_Stromal	Stromal	PCOLCE_Stromal	Stromal	0.617671
B2M_Stromal~TYROBP_Stromal	B2M_Stromal	Stromal	TYROBP_Stromal	Stromal	0.369559
BAMBI_Stromal~BMP1_Stromal	BAMBI_Stromal	Stromal	BMP1_Stromal	Stromal	0.0920695
BAMBI_Stromal~BMP2_Stromal	BAMBI_Stromal	Stromal	BMP2_Stromal	Stromal	0.0613036
BAMBI_Stromal~BMP8B_Stromal	BAMBI_Stromal	Stromal	BMP8B_Stromal	Stromal	0.0650069
BAMBI_Stromal~BMPR2_Stromal	BAMBI_Stromal	Stromal	BMPR2_Stromal	Stromal	0.0608699
BAMBI_Stromal~FZD5_Stromal	BAMBI_Stromal	Stromal	FZD5_Stromal	Stromal	0.055255
BAMBI_Stromal~GDF15_Stromal	BAMBI_Stromal	Stromal	GDF15_Stromal	Stromal	0.0526633
BAMBI_Stromal~INHBA_Stromal	BAMBI_Stromal	Stromal	INHBA_Stromal	Stromal	0.0971953
BAMBI_Stromal~TGFB1_Stromal	BAMBI_Stromal	Stromal	TGFB1_Stromal	Stromal	0.16519
BAMBI_Stromal~TGFB2_Stromal	BAMBI_Stromal	Stromal	TGFB2_Stromal	Stromal	0.110888
BAMBI_Stromal~TGFB3_Stromal	BAMBI_Stromal	Stromal	TGFB3_Stromal	Stromal	0.0853022
BAMBI_Stromal~TGFBR1_Stromal	BAMBI_Stromal	Stromal	TGFBR1_Stromal	Stromal	0.0751792
BAMBI_Stromal~TGFBR2_Stromal	BAMBI_Stromal	Stromal	TGFBR2_Stromal	Stromal	0.128466
BGLAP_Stromal~CTSB_Stromal	BGLAP_Stromal	Stromal	CTSB_Stromal	Stromal	0.389977
BGLAP_Stromal~CTSD_Stromal	BGLAP_Stromal	Stromal	CTSD_Stromal	Stromal	0.322953
BGLAP_Stromal~NR3C1_Stromal	BGLAP_Stromal	Stromal	NR3C1_Stromal	Stromal	0.249407
BGN_Stromal~CD44_Stromal	BGN_Stromal	Stromal	CD44_Stromal	Stromal	0.360091
BGN_Stromal~CHSY1_Stromal	BGN_Stromal	Stromal	CHSY1_Stromal	Stromal	0.248047
BGN_Stromal~COL10A1_Stromal	BGN_Stromal	Stromal	COL10A1_Stromal	Stromal	0.354462
BGN_Stromal~COL11A1_Stromal	BGN_Stromal	Stromal	COL11A1_Stromal	Stromal	0.341871
BGN_Stromal~COL12A1_Stromal	BGN_Stromal	Stromal	COL12A1_Stromal	Stromal	0.245788
BGN_Stromal~COL15A1_Stromal	BGN_Stromal	Stromal	COL15A1_Stromal	Stromal	0.23523
BGN_Stromal~COL16A1_Stromal	BGN_Stromal	Stromal	COL16A1_Stromal	Stromal	0.386686
BGN_Stromal~COL18A1_Stromal	BGN_Stromal	Stromal	COL18A1_Stromal	Stromal	0.240854
BGN_Stromal~COL1A1_Stromal	BGN_Stromal	Stromal	COL1A1_Stromal	Stromal	0.632544
BGN_Stromal~COL1A2_Stromal	BGN_Stromal	Stromal	COL1A2_Stromal	Stromal	0.61007
BGN_Stromal~COL3A1_Stromal	BGN_Stromal	Stromal	COL3A1_Stromal	Stromal	0.567037
BGN_Stromal~COL5A1_Stromal	BGN_Stromal	Stromal	COL5A1_Stromal	Stromal	0.441274
BGN_Stromal~COL5A2_Stromal	BGN_Stromal	Stromal	COL5A2_Stromal	Stromal	0.457176
BGN_Stromal~COL6A1_Stromal	BGN_Stromal	Stromal	COL6A1_Stromal	Stromal	0.513992
BGN_Stromal~COL6A2_Stromal	BGN_Stromal	Stromal	COL6A2_Stromal	Stromal	0.520424
BGN_Stromal~COL8A1_Stromal	BGN_Stromal	Stromal	COL8A1_Stromal	Stromal	0.283949
BGN_Stromal~COL8A2_Stromal	BGN_Stromal	Stromal	COL8A2_Stromal	Stromal	0.276673
BGN_Stromal~DCN_Stromal	BGN_Stromal	Stromal	DCN_Stromal	Stromal	0.5614
BGN_Stromal~FN1_Stromal	BGN_Stromal	Stromal	FN1_Stromal	Stromal	0.557804
BGN_Stromal~GPC1_Stromal	BGN_Stromal	Stromal	GPC1_Stromal	Stromal	0.316427
BGN_Stromal~GPC4_Stromal	BGN_Stromal	Stromal	GPC4_Stromal	Stromal	0.251064
BGN_Stromal~HSPG2_Stromal	BGN_Stromal	Stromal	HSPG2_Stromal	Stromal	0.262368
BGN_Stromal~ITGA10_Stromal	BGN_Stromal	Stromal	ITGA10_Stromal	Stromal	0.382606
BGN_Stromal~ITGA11_Stromal	BGN_Stromal	Stromal	ITGA11_Stromal	Stromal	0.33309
BGN_Stromal~ITGAE_Stromal	BGN_Stromal	Stromal	ITGAE_Stromal	Stromal	0.256454
BGN_Stromal~ITGAV_Stromal	BGN_Stromal	Stromal	ITGAV_Stromal	Stromal	0.303007
BGN_Stromal~ITGB1_Stromal	BGN_Stromal	Stromal	ITGB1_Stromal	Stromal	0.406741
BGN_Stromal~ITGB2_Stromal	BGN_Stromal	Stromal	ITGB2_Stromal	Stromal	0.255486
BGN_Stromal~ITGB5_Stromal	BGN_Stromal	Stromal	ITGB5_Stromal	Stromal	0.370102
BGN_Stromal~LUM_Stromal	BGN_Stromal	Stromal	LUM_Stromal	Stromal	0.555718
BGN_Stromal~MFAP2_Stromal	BGN_Stromal	Stromal	MFAP2_Stromal	Stromal	0.240794
BGN_Stromal~PCOLCE_Stromal	BGN_Stromal	Stromal	PCOLCE_Stromal	Stromal	0.499804
BGN_Stromal~SDC4_Stromal	BGN_Stromal	Stromal	SDC4_Stromal	Stromal	0.232391
BGN_Stromal~SMC3_Stromal	BGN_Stromal	Stromal	SMC3_Stromal	Stromal	0.287466
BGN_Stromal~TGFB1_Stromal	BGN_Stromal	Stromal	TGFB1_Stromal	Stromal	0.3559
BGN_Stromal~TGFB2_Stromal	BGN_Stromal	Stromal	TGFB2_Stromal	Stromal	0.301598
BGN_Stromal~TGFB3_Stromal	BGN_Stromal	Stromal	TGFB3_Stromal	Stromal	0.276012
BGN_Stromal~THBS1_Stromal	BGN_Stromal	Stromal	THBS1_Stromal	Stromal	0.240079
BGN_Stromal~TNC_Stromal	BGN_Stromal	Stromal	TNC_Stromal	Stromal	0.434423
BGN_Stromal~VCAN_Stromal	BGN_Stromal	Stromal	VCAN_Stromal	Stromal	0.358591
BGN_Stromal~WISP1_Stromal	BGN_Stromal	Stromal	WISP1_Stromal	Stromal	0.253831
BMP1_Stromal~BMPR2_Stromal	BMP1_Stromal	Stromal	BMPR2_Stromal	Stromal	0.0967633
BMP1_Stromal~COL11A1_Stromal	BMP1_Stromal	Stromal	COL11A1_Stromal	Stromal	0.187054
BMP1_Stromal~COL1A1_Stromal	BMP1_Stromal	Stromal	COL1A1_Stromal	Stromal	0.477727
BMP1_Stromal~COL1A2_Stromal	BMP1_Stromal	Stromal	COL1A2_Stromal	Stromal	0.455253
BMP1_Stromal~COL27A1_Stromal	BMP1_Stromal	Stromal	COL27A1_Stromal	Stromal	0.113627
BMP1_Stromal~COL3A1_Stromal	BMP1_Stromal	Stromal	COL3A1_Stromal	Stromal	0.412221
BMP1_Stromal~COL5A1_Stromal	BMP1_Stromal	Stromal	COL5A1_Stromal	Stromal	0.286457
BMP1_Stromal~COL5A2_Stromal	BMP1_Stromal	Stromal	COL5A2_Stromal	Stromal	0.30236
BMP1_Stromal~COL5A3_Stromal	BMP1_Stromal	Stromal	COL5A3_Stromal	Stromal	0.130056
BMP1_Stromal~HSPG2_Stromal	BMP1_Stromal	Stromal	HSPG2_Stromal	Stromal	0.107552
BMP1_Stromal~LOX_Stromal	BMP1_Stromal	Stromal	LOX_Stromal	Stromal	0.0749931
BMP1_Stromal~LOXL1_Stromal	BMP1_Stromal	Stromal	LOXL1_Stromal	Stromal	0.162461
BMP1_Stromal~LOXL2_Stromal	BMP1_Stromal	Stromal	LOXL2_Stromal	Stromal	0.0671391
BMP1_Stromal~PCOLCE_Stromal	BMP1_Stromal	Stromal	PCOLCE_Stromal	Stromal	0.344987
BMP1_Stromal~TGFBR1_Stromal	BMP1_Stromal	Stromal	TGFBR1_Stromal	Stromal	0.111073
BMP1_Stromal~TGFBR2_Stromal	BMP1_Stromal	Stromal	TGFBR2_Stromal	Stromal	0.16436
BMP1_Stromal~TWSG1_Stromal	BMP1_Stromal	Stromal	TWSG1_Stromal	Stromal	0.0727538
BMP2_Stromal~BMP8B_Stromal	BMP2_Stromal	Stromal	BMP8B_Stromal	Stromal	0.0701344
BMP2_Stromal~BMPR2_Stromal	BMP2_Stromal	Stromal	BMPR2_Stromal	Stromal	0.0659974
BMP2_Stromal~ENG_Stromal	BMP2_Stromal	Stromal	ENG_Stromal	Stromal	0.0795596
BMP2_Stromal~FST_Stromal	BMP2_Stromal	Stromal	FST_Stromal	Stromal	0.0817229
BMP2_Stromal~FSTL1_Stromal	BMP2_Stromal	Stromal	FSTL1_Stromal	Stromal	0.184291
BMP2_Stromal~FZD1_Stromal	BMP2_Stromal	Stromal	FZD1_Stromal	Stromal	0.0661507
BMP2_Stromal~FZD5_Stromal	BMP2_Stromal	Stromal	FZD5_Stromal	Stromal	0.0603825
BMP2_Stromal~FZD7_Stromal	BMP2_Stromal	Stromal	FZD7_Stromal	Stromal	0.0920506
BMP2_Stromal~INHBA_Stromal	BMP2_Stromal	Stromal	INHBA_Stromal	Stromal	0.102323
BMP2_Stromal~MGP_Stromal	BMP2_Stromal	Stromal	MGP_Stromal	Stromal	0.137007
BMP2_Stromal~NOTCH3_Stromal	BMP2_Stromal	Stromal	NOTCH3_Stromal	Stromal	0.160412
BMP2_Stromal~TGFB1_Stromal	BMP2_Stromal	Stromal	TGFB1_Stromal	Stromal	0.170317
BMP2_Stromal~TGFB2_Stromal	BMP2_Stromal	Stromal	TGFB2_Stromal	Stromal	0.116016
BMP2_Stromal~TGFB3_Stromal	BMP2_Stromal	Stromal	TGFB3_Stromal	Stromal	0.0904297
BMP2_Stromal~TGFBR1_Stromal	BMP2_Stromal	Stromal	TGFBR1_Stromal	Stromal	0.0803067
BMP2_Stromal~TGFBR2_Stromal	BMP2_Stromal	Stromal	TGFBR2_Stromal	Stromal	0.133594
BMP2_Stromal~TWSG1_Stromal	BMP2_Stromal	Stromal	TWSG1_Stromal	Stromal	0.0419879
BMPR2_Stromal~CD44_Stromal	BMPR2_Stromal	Stromal	CD44_Stromal	Stromal	0.174074
BMPR2_Stromal~FST_Stromal	BMPR2_Stromal	Stromal	FST_Stromal	Stromal	0.0812892
BMPR2_Stromal~NR3C1_Stromal	BMPR2_Stromal	Stromal	NR3C1_Stromal	Stromal	0.110068
BMPR2_Stromal~TGFBR1_Stromal	BMPR2_Stromal	Stromal	TGFBR1_Stromal	Stromal	0.079873
BSG_Stromal~C19orf10_Stromal	BSG_Stromal	Stromal	C19orf10_Stromal	Stromal	0.336441
BSG_Stromal~C1QBP_Stromal	BSG_Stromal	Stromal	C1QBP_Stromal	Stromal	0.271916
BSG_Stromal~CD276_Stromal	BSG_Stromal	Stromal	CD276_Stromal	Stromal	0.253601
BSG_Stromal~CD44_Stromal	BSG_Stromal	Stromal	CD44_Stromal	Stromal	0.316927
BSG_Stromal~CD47_Stromal	BSG_Stromal	Stromal	CD47_Stromal	Stromal	0.23857
BSG_Stromal~CLU_Stromal	BSG_Stromal	Stromal	CLU_Stromal	Stromal	0.341559
BSG_Stromal~COL5A1_Stromal	BSG_Stromal	Stromal	COL5A1_Stromal	Stromal	0.39811
BSG_Stromal~CRTAP_Stromal	BSG_Stromal	Stromal	CRTAP_Stromal	Stromal	0.249405
BSG_Stromal~CTSD_Stromal	BSG_Stromal	Stromal	CTSD_Stromal	Stromal	0.326466
BSG_Stromal~DPP7_Stromal	BSG_Stromal	Stromal	DPP7_Stromal	Stromal	0.286043
BSG_Stromal~FAP_Stromal	BSG_Stromal	Stromal	FAP_Stromal	Stromal	0.275113
BSG_Stromal~FBLN1_Stromal	BSG_Stromal	Stromal	FBLN1_Stromal	Stromal	0.330634
BSG_Stromal~FBN1_Stromal	BSG_Stromal	Stromal	FBN1_Stromal	Stromal	0.329275
BSG_Stromal~HNRNPM_Stromal	BSG_Stromal	Stromal	HNRNPM_Stromal	Stromal	0.282769
BSG_Stromal~HSD17B12_Stromal	BSG_Stromal	Stromal	HSD17B12_Stromal	Stromal	0.209736
BSG_Stromal~HSP90AA1_Stromal	BSG_Stromal	Stromal	HSP90AA1_Stromal	Stromal	0.406038
BSG_Stromal~HSP90B1_Stromal	BSG_Stromal	Stromal	HSP90B1_Stromal	Stromal	0.35967
BSG_Stromal~ITGAV_Stromal	BSG_Stromal	Stromal	ITGAV_Stromal	Stromal	0.259843
BSG_Stromal~ITGB1_Stromal	BSG_Stromal	Stromal	ITGB1_Stromal	Stromal	0.363577
BSG_Stromal~LAMC1_Stromal	BSG_Stromal	Stromal	LAMC1_Stromal	Stromal	0.221882
BSG_Stromal~LEPRE1_Stromal	BSG_Stromal	Stromal	LEPRE1_Stromal	Stromal	0.255385
BSG_Stromal~LGALS3_Stromal	BSG_Stromal	Stromal	LGALS3_Stromal	Stromal	0.366785
BSG_Stromal~LGALS3BP_Stromal	BSG_Stromal	Stromal	LGALS3BP_Stromal	Stromal	0.348477
BSG_Stromal~M6PR_Stromal	BSG_Stromal	Stromal	M6PR_Stromal	Stromal	0.178899
BSG_Stromal~NPTN_Stromal	BSG_Stromal	Stromal	NPTN_Stromal	Stromal	0.181174
BSG_Stromal~P4HB_Stromal	BSG_Stromal	Stromal	P4HB_Stromal	Stromal	0.360081
BSG_Stromal~PKM_Stromal	BSG_Stromal	Stromal	PKM_Stromal	Stromal	0.418943
BSG_Stromal~PLXNB2_Stromal	BSG_Stromal	Stromal	PLXNB2_Stromal	Stromal	0.259283
BSG_Stromal~PPT1_Stromal	BSG_Stromal	Stromal	PPT1_Stromal	Stromal	0.217763
BSG_Stromal~PSAP_Stromal	BSG_Stromal	Stromal	PSAP_Stromal	Stromal	0.391791
BSG_Stromal~RPSA_Stromal	BSG_Stromal	Stromal	RPSA_Stromal	Stromal	0.369736
BSG_Stromal~SDF4_Stromal	BSG_Stromal	Stromal	SDF4_Stromal	Stromal	0.289514
BSG_Stromal~SLC1A5_Stromal	BSG_Stromal	Stromal	SLC1A5_Stromal	Stromal	0.186352
BSG_Stromal~SMC3_Stromal	BSG_Stromal	Stromal	SMC3_Stromal	Stromal	0.244302
BSG_Stromal~STOML2_Stromal	BSG_Stromal	Stromal	STOML2_Stromal	Stromal	0.236858
C19orf10_Stromal~CD44_Stromal	C19orf10_Stromal	Stromal	CD44_Stromal	Stromal	0.3021
C19orf10_Stromal~HSP90AA1_Stromal	C19orf10_Stromal	Stromal	HSP90AA1_Stromal	Stromal	0.391211
C19orf10_Stromal~HSP90B1_Stromal	C19orf10_Stromal	Stromal	HSP90B1_Stromal	Stromal	0.344843
C19orf10_Stromal~ITGB1_Stromal	C19orf10_Stromal	Stromal	ITGB1_Stromal	Stromal	0.34875
C19orf10_Stromal~P4HB_Stromal	C19orf10_Stromal	Stromal	P4HB_Stromal	Stromal	0.345255
C19orf10_Stromal~PKM_Stromal	C19orf10_Stromal	Stromal	PKM_Stromal	Stromal	0.404116
C1QA_Stromal~C1QBP_Stromal	C1QA_Stromal	Stromal	C1QBP_Stromal	Stromal	0.110715
C1QA_Stromal~C1R_Stromal	C1QA_Stromal	Stromal	C1R_Stromal	Stromal	0.195326
C1QA_Stromal~C1S_Stromal	C1QA_Stromal	Stromal	C1S_Stromal	Stromal	0.225961
C1QA_Stromal~CLU_Stromal	C1QA_Stromal	Stromal	CLU_Stromal	Stromal	0.180359
C1QA_Stromal~DCN_Stromal	C1QA_Stromal	Stromal	DCN_Stromal	Stromal	0.357036
C1QA_Stromal~FN1_Stromal	C1QA_Stromal	Stromal	FN1_Stromal	Stromal	0.35344
C1QA_Stromal~LRP1_Stromal	C1QA_Stromal	Stromal	LRP1_Stromal	Stromal	0.177035
C1QBP_Stromal~CYR61_Stromal	C1QBP_Stromal	Stromal	CYR61_Stromal	Stromal	0.267255
C1QBP_Stromal~FN1_Stromal	C1QBP_Stromal	Stromal	FN1_Stromal	Stromal	0.435288
C1QBP_Stromal~GPC4_Stromal	C1QBP_Stromal	Stromal	GPC4_Stromal	Stromal	0.128547
C1QBP_Stromal~GPI_Stromal	C1QBP_Stromal	Stromal	GPI_Stromal	Stromal	0.100031
C1QBP_Stromal~HDGF_Stromal	C1QBP_Stromal	Stromal	HDGF_Stromal	Stromal	0.165591
C1QBP_Stromal~HMGB1_Stromal	C1QBP_Stromal	Stromal	HMGB1_Stromal	Stromal	0.333761
C1QBP_Stromal~HMGB2_Stromal	C1QBP_Stromal	Stromal	HMGB2_Stromal	Stromal	0.10283
C1QBP_Stromal~HNRNPM_Stromal	C1QBP_Stromal	Stromal	HNRNPM_Stromal	Stromal	0.203417
C1QBP_Stromal~HSD17B12_Stromal	C1QBP_Stromal	Stromal	HSD17B12_Stromal	Stromal	0.130383
C1QBP_Stromal~HSP90AA1_Stromal	C1QBP_Stromal	Stromal	HSP90AA1_Stromal	Stromal	0.326685
C1QBP_Stromal~HSPG2_Stromal	C1QBP_Stromal	Stromal	HSPG2_Stromal	Stromal	0.139852
C1QBP_Stromal~ITGAV_Stromal	C1QBP_Stromal	Stromal	ITGAV_Stromal	Stromal	0.180491
C1QBP_Stromal~ITGB1_Stromal	C1QBP_Stromal	Stromal	ITGB1_Stromal	Stromal	0.284224
C1QBP_Stromal~LGALS1_Stromal	C1QBP_Stromal	Stromal	LGALS1_Stromal	Stromal	0.462237
C1QBP_Stromal~M6PR_Stromal	C1QBP_Stromal	Stromal	M6PR_Stromal	Stromal	0.0995465
C1QBP_Stromal~MIF_Stromal	C1QBP_Stromal	Stromal	MIF_Stromal	Stromal	0.251286
C1QBP_Stromal~MMP14_Stromal	C1QBP_Stromal	Stromal	MMP14_Stromal	Stromal	0.26554
C1QBP_Stromal~PKM_Stromal	C1QBP_Stromal	Stromal	PKM_Stromal	Stromal	0.339591
C1QBP_Stromal~PLSCR1_Stromal	C1QBP_Stromal	Stromal	PLSCR1_Stromal	Stromal	0.10023
C1QBP_Stromal~PPT1_Stromal	C1QBP_Stromal	Stromal	PPT1_Stromal	Stromal	0.138411
C1QBP_Stromal~PSAP_Stromal	C1QBP_Stromal	Stromal	PSAP_Stromal	Stromal	0.312438
C1QBP_Stromal~RPSA_Stromal	C1QBP_Stromal	Stromal	RPSA_Stromal	Stromal	0.290384
C1QBP_Stromal~S100A8_Stromal	C1QBP_Stromal	Stromal	S100A8_Stromal	Stromal	0.122697
C1QBP_Stromal~SDF4_Stromal	C1QBP_Stromal	Stromal	SDF4_Stromal	Stromal	0.210161
C1QBP_Stromal~SLC1A5_Stromal	C1QBP_Stromal	Stromal	SLC1A5_Stromal	Stromal	0.106999
C1QBP_Stromal~SLIT2_Stromal	C1QBP_Stromal	Stromal	SLIT2_Stromal	Stromal	0.156707
C1QBP_Stromal~SMC3_Stromal	C1QBP_Stromal	Stromal	SMC3_Stromal	Stromal	0.16495
C1QBP_Stromal~SOD1_Stromal	C1QBP_Stromal	Stromal	SOD1_Stromal	Stromal	0.244739
C1QBP_Stromal~SPATA20_Stromal	C1QBP_Stromal	Stromal	SPATA20_Stromal	Stromal	0.111265
C1QBP_Stromal~STOML2_Stromal	C1QBP_Stromal	Stromal	STOML2_Stromal	Stromal	0.157505
C1QBP_Stromal~TMED1_Stromal	C1QBP_Stromal	Stromal	TMED1_Stromal	Stromal	0.161637
C1QBP_Stromal~TNFRSF1A_Stromal	C1QBP_Stromal	Stromal	TNFRSF1A_Stromal	Stromal	0.20432
C1R_Stromal~C1S_Stromal	C1R_Stromal	Stromal	C1S_Stromal	Stromal	0.392419
C1R_Stromal~SERPING1_Stromal	C1R_Stromal	Stromal	SERPING1_Stromal	Stromal	0.406343
C1S_Stromal~C2_Stromal	C1S_Stromal	Stromal	C2_Stromal	Stromal	0.277807
C1S_Stromal~FN1_Stromal	C1S_Stromal	Stromal	FN1_Stromal	Stromal	0.550533
C1S_Stromal~SERPING1_Stromal	C1S_Stromal	Stromal	SERPING1_Stromal	Stromal	0.436978
C4orf48_Stromal~TGFB1_Stromal	C4orf48_Stromal	Stromal	TGFB1_Stromal	Stromal	0.284526
CADM1_Stromal~LGALS3_Stromal	CADM1_Stromal	Stromal	LGALS3_Stromal	Stromal	0.255577
CBLN4_Stromal~NR3C1_Stromal	CBLN4_Stromal	Stromal	NR3C1_Stromal	Stromal	0.0878373
CD151_Stromal~DST_Stromal	CD151_Stromal	Stromal	DST_Stromal	Stromal	0.299333
CD151_Stromal~ITGB1_Stromal	CD151_Stromal	Stromal	ITGB1_Stromal	Stromal	0.356199
CD276_Stromal~CD44_Stromal	CD276_Stromal	Stromal	CD44_Stromal	Stromal	0.219259
CD276_Stromal~CLU_Stromal	CD276_Stromal	Stromal	CLU_Stromal	Stromal	0.243891
CD276_Stromal~COL5A1_Stromal	CD276_Stromal	Stromal	COL5A1_Stromal	Stromal	0.300442
CD276_Stromal~CRTAP_Stromal	CD276_Stromal	Stromal	CRTAP_Stromal	Stromal	0.151738
CD276_Stromal~CTSD_Stromal	CD276_Stromal	Stromal	CTSD_Stromal	Stromal	0.228799
CD276_Stromal~DPP7_Stromal	CD276_Stromal	Stromal	DPP7_Stromal	Stromal	0.188375
CD276_Stromal~FBN1_Stromal	CD276_Stromal	Stromal	FBN1_Stromal	Stromal	0.231608
CD276_Stromal~ITGAV_Stromal	CD276_Stromal	Stromal	ITGAV_Stromal	Stromal	0.162175
CD276_Stromal~ITGB1_Stromal	CD276_Stromal	Stromal	ITGB1_Stromal	Stromal	0.265909
CD276_Stromal~LAMC1_Stromal	CD276_Stromal	Stromal	LAMC1_Stromal	Stromal	0.124214
CD276_Stromal~LEPRE1_Stromal	CD276_Stromal	Stromal	LEPRE1_Stromal	Stromal	0.157717
CD276_Stromal~LGALS3BP_Stromal	CD276_Stromal	Stromal	LGALS3BP_Stromal	Stromal	0.250809
CD276_Stromal~M6PR_Stromal	CD276_Stromal	Stromal	M6PR_Stromal	Stromal	0.0812313
CD276_Stromal~PLXNB2_Stromal	CD276_Stromal	Stromal	PLXNB2_Stromal	Stromal	0.161615
CD276_Stromal~PPT1_Stromal	CD276_Stromal	Stromal	PPT1_Stromal	Stromal	0.120095
CD276_Stromal~PSAP_Stromal	CD276_Stromal	Stromal	PSAP_Stromal	Stromal	0.294123
CD276_Stromal~RYK_Stromal	CD276_Stromal	Stromal	RYK_Stromal	Stromal	0.159014
CD320_Stromal~TGFBR2_Stromal	CD320_Stromal	Stromal	TGFBR2_Stromal	Stromal	0.191303
CD4_Stromal~CD44_Stromal	CD4_Stromal	Stromal	CD44_Stromal	Stromal	0.144745
CD4_Stromal~CTSD_Stromal	CD4_Stromal	Stromal	CTSD_Stromal	Stromal	0.154284
CD4_Stromal~DBNL_Stromal	CD4_Stromal	Stromal	DBNL_Stromal	Stromal	0.0689783
CD4_Stromal~HLA-DPA1_Stromal	CD4_Stromal	Stromal	HLA-DPA1_Stromal	Stromal	0.0946289
CD4_Stromal~HLA-DQB1_Stromal	CD4_Stromal	Stromal	HLA-DQB1_Stromal	Stromal	0.0580573
CD4_Stromal~HLA-DRA_Stromal	CD4_Stromal	Stromal	HLA-DRA_Stromal	Stromal	0.172312
CD4_Stromal~HLA-DRB1_Stromal	CD4_Stromal	Stromal	HLA-DRB1_Stromal	Stromal	0.207572
CD4_Stromal~HSP90AA1_Stromal	CD4_Stromal	Stromal	HSP90AA1_Stromal	Stromal	0.233856
CD4_Stromal~LGALS1_Stromal	CD4_Stromal	Stromal	LGALS1_Stromal	Stromal	0.369408
CD4_Stromal~MFAP1_Stromal	CD4_Stromal	Stromal	MFAP1_Stromal	Stromal	0.00594574
CD4_Stromal~NR3C1_Stromal	CD4_Stromal	Stromal	NR3C1_Stromal	Stromal	0.0807387
CD4_Stromal~PLSCR1_Stromal	CD4_Stromal	Stromal	PLSCR1_Stromal	Stromal	0.00740092
CD4_Stromal~RPSA_Stromal	CD4_Stromal	Stromal	RPSA_Stromal	Stromal	0.197554
CD44_Stromal~CD74_Stromal	CD44_Stromal	Stromal	CD74_Stromal	Stromal	0.383331
CD44_Stromal~CD9_Stromal	CD44_Stromal	Stromal	CD9_Stromal	Stromal	0.298331
CD44_Stromal~CLU_Stromal	CD44_Stromal	Stromal	CLU_Stromal	Stromal	0.307217
CD44_Stromal~COL10A1_Stromal	CD44_Stromal	Stromal	COL10A1_Stromal	Stromal	0.276956
CD44_Stromal~COL11A1_Stromal	CD44_Stromal	Stromal	COL11A1_Stromal	Stromal	0.264365
CD44_Stromal~COL12A1_Stromal	CD44_Stromal	Stromal	COL12A1_Stromal	Stromal	0.168282
CD44_Stromal~COL15A1_Stromal	CD44_Stromal	Stromal	COL15A1_Stromal	Stromal	0.157724
CD44_Stromal~COL16A1_Stromal	CD44_Stromal	Stromal	COL16A1_Stromal	Stromal	0.30918
CD44_Stromal~COL18A1_Stromal	CD44_Stromal	Stromal	COL18A1_Stromal	Stromal	0.163348
CD44_Stromal~COL1A1_Stromal	CD44_Stromal	Stromal	COL1A1_Stromal	Stromal	0.555038
CD44_Stromal~COL1A2_Stromal	CD44_Stromal	Stromal	COL1A2_Stromal	Stromal	0.532564
CD44_Stromal~COL3A1_Stromal	CD44_Stromal	Stromal	COL3A1_Stromal	Stromal	0.489532
CD44_Stromal~COL5A1_Stromal	CD44_Stromal	Stromal	COL5A1_Stromal	Stromal	0.363768
CD44_Stromal~COL5A2_Stromal	CD44_Stromal	Stromal	COL5A2_Stromal	Stromal	0.379671
CD44_Stromal~COL6A1_Stromal	CD44_Stromal	Stromal	COL6A1_Stromal	Stromal	0.436487
CD44_Stromal~COL6A2_Stromal	CD44_Stromal	Stromal	COL6A2_Stromal	Stromal	0.442918
CD44_Stromal~COL8A1_Stromal	CD44_Stromal	Stromal	COL8A1_Stromal	Stromal	0.206444
CD44_Stromal~COL8A2_Stromal	CD44_Stromal	Stromal	COL8A2_Stromal	Stromal	0.199168
CD44_Stromal~CRTAP_Stromal	CD44_Stromal	Stromal	CRTAP_Stromal	Stromal	0.215064
CD44_Stromal~CTSD_Stromal	CD44_Stromal	Stromal	CTSD_Stromal	Stromal	0.292125
CD44_Stromal~DCN_Stromal	CD44_Stromal	Stromal	DCN_Stromal	Stromal	0.483895
CD44_Stromal~DPP7_Stromal	CD44_Stromal	Stromal	DPP7_Stromal	Stromal	0.251701
CD44_Stromal~FBN1_Stromal	CD44_Stromal	Stromal	FBN1_Stromal	Stromal	0.294934
CD44_Stromal~FGFR1_Stromal	CD44_Stromal	Stromal	FGFR1_Stromal	Stromal	0.37505
CD44_Stromal~FN1_Stromal	CD44_Stromal	Stromal	FN1_Stromal	Stromal	0.480299
CD44_Stromal~GPC1_Stromal	CD44_Stromal	Stromal	GPC1_Stromal	Stromal	0.238921
CD44_Stromal~GPC4_Stromal	CD44_Stromal	Stromal	GPC4_Stromal	Stromal	0.173558
CD44_Stromal~HSP90AA1_Stromal	CD44_Stromal	Stromal	HSP90AA1_Stromal	Stromal	0.371696
CD44_Stromal~HSP90B1_Stromal	CD44_Stromal	Stromal	HSP90B1_Stromal	Stromal	0.325329
CD44_Stromal~HSPG2_Stromal	CD44_Stromal	Stromal	HSPG2_Stromal	Stromal	0.184863
CD44_Stromal~ITGA10_Stromal	CD44_Stromal	Stromal	ITGA10_Stromal	Stromal	0.3051
CD44_Stromal~ITGA11_Stromal	CD44_Stromal	Stromal	ITGA11_Stromal	Stromal	0.255584
CD44_Stromal~ITGAE_Stromal	CD44_Stromal	Stromal	ITGAE_Stromal	Stromal	0.178949
CD44_Stromal~ITGAV_Stromal	CD44_Stromal	Stromal	ITGAV_Stromal	Stromal	0.225502
CD44_Stromal~ITGB1_Stromal	CD44_Stromal	Stromal	ITGB1_Stromal	Stromal	0.329235
CD44_Stromal~ITGB2_Stromal	CD44_Stromal	Stromal	ITGB2_Stromal	Stromal	0.17798
CD44_Stromal~ITGB5_Stromal	CD44_Stromal	Stromal	ITGB5_Stromal	Stromal	0.292597
CD44_Stromal~LAMC1_Stromal	CD44_Stromal	Stromal	LAMC1_Stromal	Stromal	0.18754
CD44_Stromal~LEPRE1_Stromal	CD44_Stromal	Stromal	LEPRE1_Stromal	Stromal	0.221043
CD44_Stromal~LGALS3BP_Stromal	CD44_Stromal	Stromal	LGALS3BP_Stromal	Stromal	0.314135
CD44_Stromal~LUM_Stromal	CD44_Stromal	Stromal	LUM_Stromal	Stromal	0.478213
CD44_Stromal~M6PR_Stromal	CD44_Stromal	Stromal	M6PR_Stromal	Stromal	0.144557
CD44_Stromal~MIF_Stromal	CD44_Stromal	Stromal	MIF_Stromal	Stromal	0.296297
CD44_Stromal~MMP14_Stromal	CD44_Stromal	Stromal	MMP14_Stromal	Stromal	0.310551
CD44_Stromal~MMP16_Stromal	CD44_Stromal	Stromal	MMP16_Stromal	Stromal	0.146789
CD44_Stromal~MMP2_Stromal	CD44_Stromal	Stromal	MMP2_Stromal	Stromal	0.353447
CD44_Stromal~MMP9_Stromal	CD44_Stromal	Stromal	MMP9_Stromal	Stromal	0.301767
CD44_Stromal~P4HB_Stromal	CD44_Stromal	Stromal	P4HB_Stromal	Stromal	0.32574
CD44_Stromal~PKM_Stromal	CD44_Stromal	Stromal	PKM_Stromal	Stromal	0.384602
CD44_Stromal~PLAUR_Stromal	CD44_Stromal	Stromal	PLAUR_Stromal	Stromal	0.261364
CD44_Stromal~PLXNB2_Stromal	CD44_Stromal	Stromal	PLXNB2_Stromal	Stromal	0.224941
CD44_Stromal~PPT1_Stromal	CD44_Stromal	Stromal	PPT1_Stromal	Stromal	0.183422
CD44_Stromal~PSAP_Stromal	CD44_Stromal	Stromal	PSAP_Stromal	Stromal	0.357449
CD44_Stromal~RARG_Stromal	CD44_Stromal	Stromal	RARG_Stromal	Stromal	0.180565
CD44_Stromal~SDC4_Stromal	CD44_Stromal	Stromal	SDC4_Stromal	Stromal	0.154886
CD44_Stromal~SMC3_Stromal	CD44_Stromal	Stromal	SMC3_Stromal	Stromal	0.209961
CD44_Stromal~SPP1_Stromal	CD44_Stromal	Stromal	SPP1_Stromal	Stromal	0.459218
CD44_Stromal~SRGN_Stromal	CD44_Stromal	Stromal	SRGN_Stromal	Stromal	0.195392
CD44_Stromal~TGFBR1_Stromal	CD44_Stromal	Stromal	TGFBR1_Stromal	Stromal	0.188384
CD44_Stromal~TGFBR2_Stromal	CD44_Stromal	Stromal	TGFBR2_Stromal	Stromal	0.241671
CD44_Stromal~TNC_Stromal	CD44_Stromal	Stromal	TNC_Stromal	Stromal	0.356917
CD44_Stromal~VCAN_Stromal	CD44_Stromal	Stromal	VCAN_Stromal	Stromal	0.281085
CD44_Stromal~WNT5B_Stromal	CD44_Stromal	Stromal	WNT5B_Stromal	Stromal	0.207592
CD47_Stromal~CD9_Stromal	CD47_Stromal	Stromal	CD9_Stromal	Stromal	0.219974
CD47_Stromal~FAP_Stromal	CD47_Stromal	Stromal	FAP_Stromal	Stromal	0.162414
CD47_Stromal~FAS_Stromal	CD47_Stromal	Stromal	FAS_Stromal	Stromal	0.0955311
CD47_Stromal~ITGAV_Stromal	CD47_Stromal	Stromal	ITGAV_Stromal	Stromal	0.147145
CD47_Stromal~ITGB1_Stromal	CD47_Stromal	Stromal	ITGB1_Stromal	Stromal	0.250878
CD47_Stromal~LPAR1_Stromal	CD47_Stromal	Stromal	LPAR1_Stromal	Stromal	0.0903127
CD47_Stromal~NPTN_Stromal	CD47_Stromal	Stromal	NPTN_Stromal	Stromal	0.0684759
CD47_Stromal~THBS1_Stromal	CD47_Stromal	Stromal	THBS1_Stromal	Stromal	0.0842165
CD58_Stromal~LGALS3_Stromal	CD58_Stromal	Stromal	LGALS3_Stromal	Stromal	0.211607
CD74_Stromal~CTSB_Stromal	CD74_Stromal	Stromal	CTSB_Stromal	Stromal	0.459895
CD74_Stromal~CTSD_Stromal	CD74_Stromal	Stromal	CTSD_Stromal	Stromal	0.392871
CD74_Stromal~CTSF_Stromal	CD74_Stromal	Stromal	CTSF_Stromal	Stromal	0.320709
CD74_Stromal~HLA-DPA1_Stromal	CD74_Stromal	Stromal	HLA-DPA1_Stromal	Stromal	0.333215
CD74_Stromal~HLA-DQB1_Stromal	CD74_Stromal	Stromal	HLA-DQB1_Stromal	Stromal	0.296644
CD74_Stromal~HLA-DRA_Stromal	CD74_Stromal	Stromal	HLA-DRA_Stromal	Stromal	0.410898
CD74_Stromal~HLA-DRB1_Stromal	CD74_Stromal	Stromal	HLA-DRB1_Stromal	Stromal	0.446158
CD74_Stromal~MIF_Stromal	CD74_Stromal	Stromal	MIF_Stromal	Stromal	0.397043
CD9_Stromal~HLA-A_Stromal	CD9_Stromal	Stromal	HLA-A_Stromal	Stromal	0.42022
CD9_Stromal~HLA-DRB1_Stromal	CD9_Stromal	Stromal	HLA-DRB1_Stromal	Stromal	0.361158
CD9_Stromal~HSP90AA1_Stromal	CD9_Stromal	Stromal	HSP90AA1_Stromal	Stromal	0.387442
CD9_Stromal~ITGB1_Stromal	CD9_Stromal	Stromal	ITGB1_Stromal	Stromal	0.344981
CD9_Stromal~LGALS3BP_Stromal	CD9_Stromal	Stromal	LGALS3BP_Stromal	Stromal	0.329881
CD9_Stromal~TSPAN4_Stromal	CD9_Stromal	Stromal	TSPAN4_Stromal	Stromal	0.295423
CERCAM_Stromal~PLAUR_Stromal	CERCAM_Stromal	Stromal	PLAUR_Stromal	Stromal	0.228566
CFH_Stromal~CFI_Stromal	CFH_Stromal	Stromal	CFI_Stromal	Stromal	0.26696
CFH_Stromal~CST3_Stromal	CFH_Stromal	Stromal	CST3_Stromal	Stromal	0.419646
CFH_Stromal~FN1_Stromal	CFH_Stromal	Stromal	FN1_Stromal	Stromal	0.476715
CFH_Stromal~GSN_Stromal	CFH_Stromal	Stromal	GSN_Stromal	Stromal	0.308172
CFH_Stromal~ITGB5_Stromal	CFH_Stromal	Stromal	ITGB5_Stromal	Stromal	0.289013
CFH_Stromal~SERPING1_Stromal	CFH_Stromal	Stromal	SERPING1_Stromal	Stromal	0.36316
CFH_Stromal~SLC1A5_Stromal	CFH_Stromal	Stromal	SLC1A5_Stromal	Stromal	0.148427
CFH_Stromal~THBS1_Stromal	CFH_Stromal	Stromal	THBS1_Stromal	Stromal	0.15899
CFI_Stromal~ECM1_Stromal	CFI_Stromal	Stromal	ECM1_Stromal	Stromal	0.132009
CHAD_Stromal~ITGB1_Stromal	CHAD_Stromal	Stromal	ITGB1_Stromal	Stromal	0.243439
CHSY1_Stromal~DCN_Stromal	CHSY1_Stromal	Stromal	DCN_Stromal	Stromal	0.371851
CHSY1_Stromal~HLA-DPA1_Stromal	CHSY1_Stromal	Stromal	HLA-DPA1_Stromal	Stromal	0.120426
CHSY1_Stromal~PLAUR_Stromal	CHSY1_Stromal	Stromal	PLAUR_Stromal	Stromal	0.149321
CHSY1_Stromal~SDF4_Stromal	CHSY1_Stromal	Stromal	SDF4_Stromal	Stromal	0.143129
CHSY1_Stromal~VCAN_Stromal	CHSY1_Stromal	Stromal	VCAN_Stromal	Stromal	0.169042
CLEC11A_Stromal~LAMC1_Stromal	CLEC11A_Stromal	Stromal	LAMC1_Stromal	Stromal	0.300339
CLU_Stromal~COL5A1_Stromal	CLU_Stromal	Stromal	COL5A1_Stromal	Stromal	0.388401
CLU_Stromal~CRTAP_Stromal	CLU_Stromal	Stromal	CRTAP_Stromal	Stromal	0.239696
CLU_Stromal~CTSD_Stromal	CLU_Stromal	Stromal	CTSD_Stromal	Stromal	0.316757
CLU_Stromal~DPP7_Stromal	CLU_Stromal	Stromal	DPP7_Stromal	Stromal	0.276333
CLU_Stromal~FBN1_Stromal	CLU_Stromal	Stromal	FBN1_Stromal	Stromal	0.319566
CLU_Stromal~FGFR1_Stromal	CLU_Stromal	Stromal	FGFR1_Stromal	Stromal	0.399682
CLU_Stromal~FN1_Stromal	CLU_Stromal	Stromal	FN1_Stromal	Stromal	0.504931
CLU_Stromal~HLA-DPA1_Stromal	CLU_Stromal	Stromal	HLA-DPA1_Stromal	Stromal	0.257102
CLU_Stromal~HSP90AA1_Stromal	CLU_Stromal	Stromal	HSP90AA1_Stromal	Stromal	0.396329
CLU_Stromal~HSP90B1_Stromal	CLU_Stromal	Stromal	HSP90B1_Stromal	Stromal	0.349961
CLU_Stromal~ITGAV_Stromal	CLU_Stromal	Stromal	ITGAV_Stromal	Stromal	0.250134
CLU_Stromal~ITGB1_Stromal	CLU_Stromal	Stromal	ITGB1_Stromal	Stromal	0.353867
CLU_Stromal~LAMC1_Stromal	CLU_Stromal	Stromal	LAMC1_Stromal	Stromal	0.212172
CLU_Stromal~LEPRE1_Stromal	CLU_Stromal	Stromal	LEPRE1_Stromal	Stromal	0.245675
CLU_Stromal~LGALS3_Stromal	CLU_Stromal	Stromal	LGALS3_Stromal	Stromal	0.357076
CLU_Stromal~LGALS3BP_Stromal	CLU_Stromal	Stromal	LGALS3BP_Stromal	Stromal	0.338767
CLU_Stromal~LTBP4_Stromal	CLU_Stromal	Stromal	LTBP4_Stromal	Stromal	0.194225
CLU_Stromal~M6PR_Stromal	CLU_Stromal	Stromal	M6PR_Stromal	Stromal	0.16919
CLU_Stromal~MMP9_Stromal	CLU_Stromal	Stromal	MMP9_Stromal	Stromal	0.3264
CLU_Stromal~NR3C1_Stromal	CLU_Stromal	Stromal	NR3C1_Stromal	Stromal	0.243211
CLU_Stromal~NR4A1_Stromal	CLU_Stromal	Stromal	NR4A1_Stromal	Stromal	0.179705
CLU_Stromal~NUCB2_Stromal	CLU_Stromal	Stromal	NUCB2_Stromal	Stromal	0.285825
CLU_Stromal~P4HB_Stromal	CLU_Stromal	Stromal	P4HB_Stromal	Stromal	0.350372
CLU_Stromal~PDGFRA_Stromal	CLU_Stromal	Stromal	PDGFRA_Stromal	Stromal	0.249983
CLU_Stromal~PKM_Stromal	CLU_Stromal	Stromal	PKM_Stromal	Stromal	0.409234
CLU_Stromal~PLXNB2_Stromal	CLU_Stromal	Stromal	PLXNB2_Stromal	Stromal	0.249573
CLU_Stromal~PPT1_Stromal	CLU_Stromal	Stromal	PPT1_Stromal	Stromal	0.208054
CLU_Stromal~PSAP_Stromal	CLU_Stromal	Stromal	PSAP_Stromal	Stromal	0.382082
CLU_Stromal~S100A4_Stromal	CLU_Stromal	Stromal	S100A4_Stromal	Stromal	0.481125
CLU_Stromal~SDF4_Stromal	CLU_Stromal	Stromal	SDF4_Stromal	Stromal	0.279804
CLU_Stromal~SMC3_Stromal	CLU_Stromal	Stromal	SMC3_Stromal	Stromal	0.234593
CLU_Stromal~TGFBR1_Stromal	CLU_Stromal	Stromal	TGFBR1_Stromal	Stromal	0.213016
CLU_Stromal~TGFBR2_Stromal	CLU_Stromal	Stromal	TGFBR2_Stromal	Stromal	0.266303
CLU_Stromal~TNC_Stromal	CLU_Stromal	Stromal	TNC_Stromal	Stromal	0.381549
CMTM3_Stromal~SPP1_Stromal	CMTM3_Stromal	Stromal	SPP1_Stromal	Stromal	0.423459
CMTM6_Stromal~LPAR1_Stromal	CMTM6_Stromal	Stromal	LPAR1_Stromal	Stromal	0.0735204
COL10A1_Stromal~COL11A1_Stromal	COL10A1_Stromal	Stromal	COL11A1_Stromal	Stromal	0.258737
COL10A1_Stromal~COL12A1_Stromal	COL10A1_Stromal	Stromal	COL12A1_Stromal	Stromal	0.162653
COL10A1_Stromal~COL15A1_Stromal	COL10A1_Stromal	Stromal	COL15A1_Stromal	Stromal	0.152096
COL10A1_Stromal~COL16A1_Stromal	COL10A1_Stromal	Stromal	COL16A1_Stromal	Stromal	0.303551
COL10A1_Stromal~COL18A1_Stromal	COL10A1_Stromal	Stromal	COL18A1_Stromal	Stromal	0.15772
COL10A1_Stromal~COL1A1_Stromal	COL10A1_Stromal	Stromal	COL1A1_Stromal	Stromal	0.549409
COL10A1_Stromal~COL1A2_Stromal	COL10A1_Stromal	Stromal	COL1A2_Stromal	Stromal	0.526936
COL10A1_Stromal~COL3A1_Stromal	COL10A1_Stromal	Stromal	COL3A1_Stromal	Stromal	0.483903
COL10A1_Stromal~COL5A1_Stromal	COL10A1_Stromal	Stromal	COL5A1_Stromal	Stromal	0.35814
COL10A1_Stromal~COL5A2_Stromal	COL10A1_Stromal	Stromal	COL5A2_Stromal	Stromal	0.374042
COL10A1_Stromal~COL6A1_Stromal	COL10A1_Stromal	Stromal	COL6A1_Stromal	Stromal	0.430858
COL10A1_Stromal~COL6A2_Stromal	COL10A1_Stromal	Stromal	COL6A2_Stromal	Stromal	0.43729
COL10A1_Stromal~COL8A1_Stromal	COL10A1_Stromal	Stromal	COL8A1_Stromal	Stromal	0.200815
COL10A1_Stromal~COL8A2_Stromal	COL10A1_Stromal	Stromal	COL8A2_Stromal	Stromal	0.193539
COL10A1_Stromal~CRTAP_Stromal	COL10A1_Stromal	Stromal	CRTAP_Stromal	Stromal	0.209435
COL10A1_Stromal~DCN_Stromal	COL10A1_Stromal	Stromal	DCN_Stromal	Stromal	0.478266
COL10A1_Stromal~FN1_Stromal	COL10A1_Stromal	Stromal	FN1_Stromal	Stromal	0.47467
COL10A1_Stromal~GPC1_Stromal	COL10A1_Stromal	Stromal	GPC1_Stromal	Stromal	0.233293
COL10A1_Stromal~GPC4_Stromal	COL10A1_Stromal	Stromal	GPC4_Stromal	Stromal	0.167929
COL10A1_Stromal~HSPG2_Stromal	COL10A1_Stromal	Stromal	HSPG2_Stromal	Stromal	0.179234
COL10A1_Stromal~ITGA10_Stromal	COL10A1_Stromal	Stromal	ITGA10_Stromal	Stromal	0.299471
COL10A1_Stromal~ITGA11_Stromal	COL10A1_Stromal	Stromal	ITGA11_Stromal	Stromal	0.249955
COL10A1_Stromal~ITGAE_Stromal	COL10A1_Stromal	Stromal	ITGAE_Stromal	Stromal	0.17332
COL10A1_Stromal~ITGAV_Stromal	COL10A1_Stromal	Stromal	ITGAV_Stromal	Stromal	0.219873
COL10A1_Stromal~ITGB1_Stromal	COL10A1_Stromal	Stromal	ITGB1_Stromal	Stromal	0.323606
COL10A1_Stromal~ITGB2_Stromal	COL10A1_Stromal	Stromal	ITGB2_Stromal	Stromal	0.172352
COL10A1_Stromal~ITGB5_Stromal	COL10A1_Stromal	Stromal	ITGB5_Stromal	Stromal	0.286968
COL10A1_Stromal~ITGBL1_Stromal	COL10A1_Stromal	Stromal	ITGBL1_Stromal	Stromal	0.18082
COL10A1_Stromal~LAMA4_Stromal	COL10A1_Stromal	Stromal	LAMA4_Stromal	Stromal	0.256331
COL10A1_Stromal~LAMB1_Stromal	COL10A1_Stromal	Stromal	LAMB1_Stromal	Stromal	0.209626
COL10A1_Stromal~LAMB2_Stromal	COL10A1_Stromal	Stromal	LAMB2_Stromal	Stromal	0.264221
COL10A1_Stromal~LAMC1_Stromal	COL10A1_Stromal	Stromal	LAMC1_Stromal	Stromal	0.181911
COL10A1_Stromal~LUM_Stromal	COL10A1_Stromal	Stromal	LUM_Stromal	Stromal	0.472584
COL10A1_Stromal~P4HB_Stromal	COL10A1_Stromal	Stromal	P4HB_Stromal	Stromal	0.320111
COL10A1_Stromal~SDC4_Stromal	COL10A1_Stromal	Stromal	SDC4_Stromal	Stromal	0.149257
COL10A1_Stromal~SMC3_Stromal	COL10A1_Stromal	Stromal	SMC3_Stromal	Stromal	0.204332
COL10A1_Stromal~TNC_Stromal	COL10A1_Stromal	Stromal	TNC_Stromal	Stromal	0.351288
COL10A1_Stromal~VCAN_Stromal	COL10A1_Stromal	Stromal	VCAN_Stromal	Stromal	0.275457
COL11A1_Stromal~COL12A1_Stromal	COL11A1_Stromal	Stromal	COL12A1_Stromal	Stromal	0.150062
COL11A1_Stromal~COL15A1_Stromal	COL11A1_Stromal	Stromal	COL15A1_Stromal	Stromal	0.139505
COL11A1_Stromal~COL16A1_Stromal	COL11A1_Stromal	Stromal	COL16A1_Stromal	Stromal	0.29096
COL11A1_Stromal~COL18A1_Stromal	COL11A1_Stromal	Stromal	COL18A1_Stromal	Stromal	0.145129
COL11A1_Stromal~COL1A1_Stromal	COL11A1_Stromal	Stromal	COL1A1_Stromal	Stromal	0.536819
COL11A1_Stromal~COL1A2_Stromal	COL11A1_Stromal	Stromal	COL1A2_Stromal	Stromal	0.514345
COL11A1_Stromal~COL3A1_Stromal	COL11A1_Stromal	Stromal	COL3A1_Stromal	Stromal	0.471312
COL11A1_Stromal~COL5A1_Stromal	COL11A1_Stromal	Stromal	COL5A1_Stromal	Stromal	0.345549
COL11A1_Stromal~COL5A2_Stromal	COL11A1_Stromal	Stromal	COL5A2_Stromal	Stromal	0.361451
COL11A1_Stromal~COL6A1_Stromal	COL11A1_Stromal	Stromal	COL6A1_Stromal	Stromal	0.418267
COL11A1_Stromal~COL6A2_Stromal	COL11A1_Stromal	Stromal	COL6A2_Stromal	Stromal	0.424699
COL11A1_Stromal~COL8A1_Stromal	COL11A1_Stromal	Stromal	COL8A1_Stromal	Stromal	0.188224
COL11A1_Stromal~COL8A2_Stromal	COL11A1_Stromal	Stromal	COL8A2_Stromal	Stromal	0.180948
COL11A1_Stromal~CRTAP_Stromal	COL11A1_Stromal	Stromal	CRTAP_Stromal	Stromal	0.196844
COL11A1_Stromal~DCN_Stromal	COL11A1_Stromal	Stromal	DCN_Stromal	Stromal	0.465675
COL11A1_Stromal~FN1_Stromal	COL11A1_Stromal	Stromal	FN1_Stromal	Stromal	0.462079
COL11A1_Stromal~GPC1_Stromal	COL11A1_Stromal	Stromal	GPC1_Stromal	Stromal	0.220702
COL11A1_Stromal~GPC4_Stromal	COL11A1_Stromal	Stromal	GPC4_Stromal	Stromal	0.155338
COL11A1_Stromal~HSPG2_Stromal	COL11A1_Stromal	Stromal	HSPG2_Stromal	Stromal	0.166643
COL11A1_Stromal~ITGA10_Stromal	COL11A1_Stromal	Stromal	ITGA10_Stromal	Stromal	0.28688
COL11A1_Stromal~ITGA11_Stromal	COL11A1_Stromal	Stromal	ITGA11_Stromal	Stromal	0.237365
COL11A1_Stromal~ITGAE_Stromal	COL11A1_Stromal	Stromal	ITGAE_Stromal	Stromal	0.160729
COL11A1_Stromal~ITGAV_Stromal	COL11A1_Stromal	Stromal	ITGAV_Stromal	Stromal	0.207282
COL11A1_Stromal~ITGB1_Stromal	COL11A1_Stromal	Stromal	ITGB1_Stromal	Stromal	0.311015
COL11A1_Stromal~ITGB2_Stromal	COL11A1_Stromal	Stromal	ITGB2_Stromal	Stromal	0.159761
COL11A1_Stromal~ITGB5_Stromal	COL11A1_Stromal	Stromal	ITGB5_Stromal	Stromal	0.274377
COL11A1_Stromal~ITGBL1_Stromal	COL11A1_Stromal	Stromal	ITGBL1_Stromal	Stromal	0.168229
COL11A1_Stromal~LAMA4_Stromal	COL11A1_Stromal	Stromal	LAMA4_Stromal	Stromal	0.24374
COL11A1_Stromal~LAMB1_Stromal	COL11A1_Stromal	Stromal	LAMB1_Stromal	Stromal	0.197035
COL11A1_Stromal~LAMB2_Stromal	COL11A1_Stromal	Stromal	LAMB2_Stromal	Stromal	0.25163
COL11A1_Stromal~LAMC1_Stromal	COL11A1_Stromal	Stromal	LAMC1_Stromal	Stromal	0.16932
COL11A1_Stromal~LUM_Stromal	COL11A1_Stromal	Stromal	LUM_Stromal	Stromal	0.459993
COL11A1_Stromal~P4HB_Stromal	COL11A1_Stromal	Stromal	P4HB_Stromal	Stromal	0.30752
COL11A1_Stromal~SDC4_Stromal	COL11A1_Stromal	Stromal	SDC4_Stromal	Stromal	0.136666
COL11A1_Stromal~SMC3_Stromal	COL11A1_Stromal	Stromal	SMC3_Stromal	Stromal	0.191741
COL11A1_Stromal~TNC_Stromal	COL11A1_Stromal	Stromal	TNC_Stromal	Stromal	0.338697
COL11A1_Stromal~VCAN_Stromal	COL11A1_Stromal	Stromal	VCAN_Stromal	Stromal	0.262866
COL12A1_Stromal~COL15A1_Stromal	COL12A1_Stromal	Stromal	COL15A1_Stromal	Stromal	0.0434214
COL12A1_Stromal~COL16A1_Stromal	COL12A1_Stromal	Stromal	COL16A1_Stromal	Stromal	0.194877
COL12A1_Stromal~COL18A1_Stromal	COL12A1_Stromal	Stromal	COL18A1_Stromal	Stromal	0.0490453
COL12A1_Stromal~COL1A1_Stromal	COL12A1_Stromal	Stromal	COL1A1_Stromal	Stromal	0.440735
COL12A1_Stromal~COL1A2_Stromal	COL12A1_Stromal	Stromal	COL1A2_Stromal	Stromal	0.418261
COL12A1_Stromal~COL3A1_Stromal	COL12A1_Stromal	Stromal	COL3A1_Stromal	Stromal	0.375229
COL12A1_Stromal~COL5A1_Stromal	COL12A1_Stromal	Stromal	COL5A1_Stromal	Stromal	0.249465
COL12A1_Stromal~COL5A2_Stromal	COL12A1_Stromal	Stromal	COL5A2_Stromal	Stromal	0.265368
COL12A1_Stromal~COL6A1_Stromal	COL12A1_Stromal	Stromal	COL6A1_Stromal	Stromal	0.322184
COL12A1_Stromal~COL6A2_Stromal	COL12A1_Stromal	Stromal	COL6A2_Stromal	Stromal	0.328615
COL12A1_Stromal~COL8A1_Stromal	COL12A1_Stromal	Stromal	COL8A1_Stromal	Stromal	0.0921409
COL12A1_Stromal~COL8A2_Stromal	COL12A1_Stromal	Stromal	COL8A2_Stromal	Stromal	0.0848647
COL12A1_Stromal~CRTAP_Stromal	COL12A1_Stromal	Stromal	CRTAP_Stromal	Stromal	0.100761
COL12A1_Stromal~DCN_Stromal	COL12A1_Stromal	Stromal	DCN_Stromal	Stromal	0.369592
COL12A1_Stromal~FN1_Stromal	COL12A1_Stromal	Stromal	FN1_Stromal	Stromal	0.365996
COL12A1_Stromal~GPC1_Stromal	COL12A1_Stromal	Stromal	GPC1_Stromal	Stromal	0.124618
COL12A1_Stromal~GPC4_Stromal	COL12A1_Stromal	Stromal	GPC4_Stromal	Stromal	0.0592549
COL12A1_Stromal~HSPG2_Stromal	COL12A1_Stromal	Stromal	HSPG2_Stromal	Stromal	0.0705598
COL12A1_Stromal~ITGA10_Stromal	COL12A1_Stromal	Stromal	ITGA10_Stromal	Stromal	0.190797
COL12A1_Stromal~ITGA11_Stromal	COL12A1_Stromal	Stromal	ITGA11_Stromal	Stromal	0.141281
COL12A1_Stromal~ITGAE_Stromal	COL12A1_Stromal	Stromal	ITGAE_Stromal	Stromal	0.0646456
COL12A1_Stromal~ITGAV_Stromal	COL12A1_Stromal	Stromal	ITGAV_Stromal	Stromal	0.111198
COL12A1_Stromal~ITGB1_Stromal	COL12A1_Stromal	Stromal	ITGB1_Stromal	Stromal	0.214932
COL12A1_Stromal~ITGB2_Stromal	COL12A1_Stromal	Stromal	ITGB2_Stromal	Stromal	0.0636773
COL12A1_Stromal~ITGB5_Stromal	COL12A1_Stromal	Stromal	ITGB5_Stromal	Stromal	0.178294
COL12A1_Stromal~ITGBL1_Stromal	COL12A1_Stromal	Stromal	ITGBL1_Stromal	Stromal	0.0721458
COL12A1_Stromal~LAMA4_Stromal	COL12A1_Stromal	Stromal	LAMA4_Stromal	Stromal	0.147657
COL12A1_Stromal~LAMB1_Stromal	COL12A1_Stromal	Stromal	LAMB1_Stromal	Stromal	0.100952
COL12A1_Stromal~LAMB2_Stromal	COL12A1_Stromal	Stromal	LAMB2_Stromal	Stromal	0.155547
COL12A1_Stromal~LAMC1_Stromal	COL12A1_Stromal	Stromal	LAMC1_Stromal	Stromal	0.0732371
COL12A1_Stromal~LUM_Stromal	COL12A1_Stromal	Stromal	LUM_Stromal	Stromal	0.36391
COL12A1_Stromal~P4HB_Stromal	COL12A1_Stromal	Stromal	P4HB_Stromal	Stromal	0.211437
COL12A1_Stromal~SDC4_Stromal	COL12A1_Stromal	Stromal	SDC4_Stromal	Stromal	0.0405828
COL12A1_Stromal~SMC3_Stromal	COL12A1_Stromal	Stromal	SMC3_Stromal	Stromal	0.0956576
COL12A1_Stromal~TNC_Stromal	COL12A1_Stromal	Stromal	TNC_Stromal	Stromal	0.242614
COL12A1_Stromal~VCAN_Stromal	COL12A1_Stromal	Stromal	VCAN_Stromal	Stromal	0.166782
COL15A1_Stromal~COL16A1_Stromal	COL15A1_Stromal	Stromal	COL16A1_Stromal	Stromal	0.184319
COL15A1_Stromal~COL18A1_Stromal	COL15A1_Stromal	Stromal	COL18A1_Stromal	Stromal	0.0384878
COL15A1_Stromal~COL1A1_Stromal	COL15A1_Stromal	Stromal	COL1A1_Stromal	Stromal	0.430178
COL15A1_Stromal~COL1A2_Stromal	COL15A1_Stromal	Stromal	COL1A2_Stromal	Stromal	0.407704
COL15A1_Stromal~COL3A1_Stromal	COL15A1_Stromal	Stromal	COL3A1_Stromal	Stromal	0.364671
COL15A1_Stromal~COL5A1_Stromal	COL15A1_Stromal	Stromal	COL5A1_Stromal	Stromal	0.238908
COL15A1_Stromal~COL5A2_Stromal	COL15A1_Stromal	Stromal	COL5A2_Stromal	Stromal	0.25481
COL15A1_Stromal~COL6A1_Stromal	COL15A1_Stromal	Stromal	COL6A1_Stromal	Stromal	0.311626
COL15A1_Stromal~COL6A2_Stromal	COL15A1_Stromal	Stromal	COL6A2_Stromal	Stromal	0.318058
COL15A1_Stromal~COL8A1_Stromal	COL15A1_Stromal	Stromal	COL8A1_Stromal	Stromal	0.0815834
COL15A1_Stromal~COL8A2_Stromal	COL15A1_Stromal	Stromal	COL8A2_Stromal	Stromal	0.0743072
COL15A1_Stromal~CRTAP_Stromal	COL15A1_Stromal	Stromal	CRTAP_Stromal	Stromal	0.0902031
COL15A1_Stromal~CTSB_Stromal	COL15A1_Stromal	Stromal	CTSB_Stromal	Stromal	0.234288
COL15A1_Stromal~DCN_Stromal	COL15A1_Stromal	Stromal	DCN_Stromal	Stromal	0.359034
COL15A1_Stromal~FN1_Stromal	COL15A1_Stromal	Stromal	FN1_Stromal	Stromal	0.355438
COL15A1_Stromal~GPC1_Stromal	COL15A1_Stromal	Stromal	GPC1_Stromal	Stromal	0.114061
COL15A1_Stromal~GPC4_Stromal	COL15A1_Stromal	Stromal	GPC4_Stromal	Stromal	0.0486974
COL15A1_Stromal~HSPG2_Stromal	COL15A1_Stromal	Stromal	HSPG2_Stromal	Stromal	0.0600023
COL15A1_Stromal~ITGA10_Stromal	COL15A1_Stromal	Stromal	ITGA10_Stromal	Stromal	0.18024
COL15A1_Stromal~ITGA11_Stromal	COL15A1_Stromal	Stromal	ITGA11_Stromal	Stromal	0.130724
COL15A1_Stromal~ITGAE_Stromal	COL15A1_Stromal	Stromal	ITGAE_Stromal	Stromal	0.0540881
COL15A1_Stromal~ITGAV_Stromal	COL15A1_Stromal	Stromal	ITGAV_Stromal	Stromal	0.100641
COL15A1_Stromal~ITGB1_Stromal	COL15A1_Stromal	Stromal	ITGB1_Stromal	Stromal	0.204374
COL15A1_Stromal~ITGB2_Stromal	COL15A1_Stromal	Stromal	ITGB2_Stromal	Stromal	0.0531198
COL15A1_Stromal~ITGB5_Stromal	COL15A1_Stromal	Stromal	ITGB5_Stromal	Stromal	0.167736
COL15A1_Stromal~ITGBL1_Stromal	COL15A1_Stromal	Stromal	ITGBL1_Stromal	Stromal	0.0615883
COL15A1_Stromal~LAMA4_Stromal	COL15A1_Stromal	Stromal	LAMA4_Stromal	Stromal	0.137099
COL15A1_Stromal~LAMB1_Stromal	COL15A1_Stromal	Stromal	LAMB1_Stromal	Stromal	0.0903942
COL15A1_Stromal~LAMB2_Stromal	COL15A1_Stromal	Stromal	LAMB2_Stromal	Stromal	0.144989
COL15A1_Stromal~LAMC1_Stromal	COL15A1_Stromal	Stromal	LAMC1_Stromal	Stromal	0.0626796
COL15A1_Stromal~LUM_Stromal	COL15A1_Stromal	Stromal	LUM_Stromal	Stromal	0.353352
COL15A1_Stromal~MMP13_Stromal	COL15A1_Stromal	Stromal	MMP13_Stromal	Stromal	0.256032
COL15A1_Stromal~MMP9_Stromal	COL15A1_Stromal	Stromal	MMP9_Stromal	Stromal	0.176907
COL15A1_Stromal~P4HB_Stromal	COL15A1_Stromal	Stromal	P4HB_Stromal	Stromal	0.200879
COL15A1_Stromal~SDC4_Stromal	COL15A1_Stromal	Stromal	SDC4_Stromal	Stromal	0.0300253
COL15A1_Stromal~SMC3_Stromal	COL15A1_Stromal	Stromal	SMC3_Stromal	Stromal	0.0851001
COL15A1_Stromal~TNC_Stromal	COL15A1_Stromal	Stromal	TNC_Stromal	Stromal	0.232056
COL15A1_Stromal~VCAN_Stromal	COL15A1_Stromal	Stromal	VCAN_Stromal	Stromal	0.156225
COL16A1_Stromal~COL18A1_Stromal	COL16A1_Stromal	Stromal	COL18A1_Stromal	Stromal	0.189943
COL16A1_Stromal~COL1A1_Stromal	COL16A1_Stromal	Stromal	COL1A1_Stromal	Stromal	0.581633
COL16A1_Stromal~COL1A2_Stromal	COL16A1_Stromal	Stromal	COL1A2_Stromal	Stromal	0.559159
COL16A1_Stromal~COL3A1_Stromal	COL16A1_Stromal	Stromal	COL3A1_Stromal	Stromal	0.516127
COL16A1_Stromal~COL5A1_Stromal	COL16A1_Stromal	Stromal	COL5A1_Stromal	Stromal	0.390363
COL16A1_Stromal~COL5A2_Stromal	COL16A1_Stromal	Stromal	COL5A2_Stromal	Stromal	0.406266
COL16A1_Stromal~COL6A1_Stromal	COL16A1_Stromal	Stromal	COL6A1_Stromal	Stromal	0.463082
COL16A1_Stromal~COL6A2_Stromal	COL16A1_Stromal	Stromal	COL6A2_Stromal	Stromal	0.469513
COL16A1_Stromal~COL8A1_Stromal	COL16A1_Stromal	Stromal	COL8A1_Stromal	Stromal	0.233039
COL16A1_Stromal~COL8A2_Stromal	COL16A1_Stromal	Stromal	COL8A2_Stromal	Stromal	0.225763
COL16A1_Stromal~CRTAP_Stromal	COL16A1_Stromal	Stromal	CRTAP_Stromal	Stromal	0.241659
COL16A1_Stromal~DCN_Stromal	COL16A1_Stromal	Stromal	DCN_Stromal	Stromal	0.51049
COL16A1_Stromal~FN1_Stromal	COL16A1_Stromal	Stromal	FN1_Stromal	Stromal	0.506894
COL16A1_Stromal~GPC1_Stromal	COL16A1_Stromal	Stromal	GPC1_Stromal	Stromal	0.265516
COL16A1_Stromal~GPC4_Stromal	COL16A1_Stromal	Stromal	GPC4_Stromal	Stromal	0.200153
COL16A1_Stromal~HSPG2_Stromal	COL16A1_Stromal	Stromal	HSPG2_Stromal	Stromal	0.211458
COL16A1_Stromal~ITGA10_Stromal	COL16A1_Stromal	Stromal	ITGA10_Stromal	Stromal	0.331695
COL16A1_Stromal~ITGA11_Stromal	COL16A1_Stromal	Stromal	ITGA11_Stromal	Stromal	0.282179
COL16A1_Stromal~ITGAE_Stromal	COL16A1_Stromal	Stromal	ITGAE_Stromal	Stromal	0.205544
COL16A1_Stromal~ITGAV_Stromal	COL16A1_Stromal	Stromal	ITGAV_Stromal	Stromal	0.252097
COL16A1_Stromal~ITGB1_Stromal	COL16A1_Stromal	Stromal	ITGB1_Stromal	Stromal	0.35583
COL16A1_Stromal~ITGB2_Stromal	COL16A1_Stromal	Stromal	ITGB2_Stromal	Stromal	0.204575
COL16A1_Stromal~ITGB5_Stromal	COL16A1_Stromal	Stromal	ITGB5_Stromal	Stromal	0.319192
COL16A1_Stromal~ITGBL1_Stromal	COL16A1_Stromal	Stromal	ITGBL1_Stromal	Stromal	0.213044
COL16A1_Stromal~LAMA4_Stromal	COL16A1_Stromal	Stromal	LAMA4_Stromal	Stromal	0.288555
COL16A1_Stromal~LAMB1_Stromal	COL16A1_Stromal	Stromal	LAMB1_Stromal	Stromal	0.24185
COL16A1_Stromal~LAMB2_Stromal	COL16A1_Stromal	Stromal	LAMB2_Stromal	Stromal	0.296445
COL16A1_Stromal~LAMC1_Stromal	COL16A1_Stromal	Stromal	LAMC1_Stromal	Stromal	0.214135
COL16A1_Stromal~LUM_Stromal	COL16A1_Stromal	Stromal	LUM_Stromal	Stromal	0.504808
COL16A1_Stromal~MMP9_Stromal	COL16A1_Stromal	Stromal	MMP9_Stromal	Stromal	0.328362
COL16A1_Stromal~P4HB_Stromal	COL16A1_Stromal	Stromal	P4HB_Stromal	Stromal	0.352335
COL16A1_Stromal~SDC4_Stromal	COL16A1_Stromal	Stromal	SDC4_Stromal	Stromal	0.181481
COL16A1_Stromal~SMC3_Stromal	COL16A1_Stromal	Stromal	SMC3_Stromal	Stromal	0.236556
COL16A1_Stromal~TNC_Stromal	COL16A1_Stromal	Stromal	TNC_Stromal	Stromal	0.383512
COL16A1_Stromal~VCAN_Stromal	COL16A1_Stromal	Stromal	VCAN_Stromal	Stromal	0.30768
COL18A1_Stromal~COL1A1_Stromal	COL18A1_Stromal	Stromal	COL1A1_Stromal	Stromal	0.435801
COL18A1_Stromal~COL1A2_Stromal	COL18A1_Stromal	Stromal	COL1A2_Stromal	Stromal	0.413328
COL18A1_Stromal~COL3A1_Stromal	COL18A1_Stromal	Stromal	COL3A1_Stromal	Stromal	0.370295
COL18A1_Stromal~COL5A1_Stromal	COL18A1_Stromal	Stromal	COL5A1_Stromal	Stromal	0.244532
COL18A1_Stromal~COL5A2_Stromal	COL18A1_Stromal	Stromal	COL5A2_Stromal	Stromal	0.260434
COL18A1_Stromal~COL6A1_Stromal	COL18A1_Stromal	Stromal	COL6A1_Stromal	Stromal	0.31725
COL18A1_Stromal~COL6A2_Stromal	COL18A1_Stromal	Stromal	COL6A2_Stromal	Stromal	0.323682
COL18A1_Stromal~COL8A1_Stromal	COL18A1_Stromal	Stromal	COL8A1_Stromal	Stromal	0.0872072
COL18A1_Stromal~COL8A2_Stromal	COL18A1_Stromal	Stromal	COL8A2_Stromal	Stromal	0.079931
COL18A1_Stromal~CRTAP_Stromal	COL18A1_Stromal	Stromal	CRTAP_Stromal	Stromal	0.0958269
COL18A1_Stromal~CTSB_Stromal	COL18A1_Stromal	Stromal	CTSB_Stromal	Stromal	0.239912
COL18A1_Stromal~CTSD_Stromal	COL18A1_Stromal	Stromal	CTSD_Stromal	Stromal	0.172888
COL18A1_Stromal~DCN_Stromal	COL18A1_Stromal	Stromal	DCN_Stromal	Stromal	0.364658
COL18A1_Stromal~FN1_Stromal	COL18A1_Stromal	Stromal	FN1_Stromal	Stromal	0.361062
COL18A1_Stromal~GPC1_Stromal	COL18A1_Stromal	Stromal	GPC1_Stromal	Stromal	0.119685
COL18A1_Stromal~GPC4_Stromal	COL18A1_Stromal	Stromal	GPC4_Stromal	Stromal	0.0543213
COL18A1_Stromal~HSPG2_Stromal	COL18A1_Stromal	Stromal	HSPG2_Stromal	Stromal	0.0656262
COL18A1_Stromal~ITGA10_Stromal	COL18A1_Stromal	Stromal	ITGA10_Stromal	Stromal	0.185863
COL18A1_Stromal~ITGA11_Stromal	COL18A1_Stromal	Stromal	ITGA11_Stromal	Stromal	0.136347
COL18A1_Stromal~ITGAE_Stromal	COL18A1_Stromal	Stromal	ITGAE_Stromal	Stromal	0.059712
COL18A1_Stromal~ITGAV_Stromal	COL18A1_Stromal	Stromal	ITGAV_Stromal	Stromal	0.106265
COL18A1_Stromal~ITGB1_Stromal	COL18A1_Stromal	Stromal	ITGB1_Stromal	Stromal	0.209998
COL18A1_Stromal~ITGB2_Stromal	COL18A1_Stromal	Stromal	ITGB2_Stromal	Stromal	0.0587437
COL18A1_Stromal~ITGB5_Stromal	COL18A1_Stromal	Stromal	ITGB5_Stromal	Stromal	0.17336
COL18A1_Stromal~LAMB1_Stromal	COL18A1_Stromal	Stromal	LAMB1_Stromal	Stromal	0.096018
COL18A1_Stromal~LAMC1_Stromal	COL18A1_Stromal	Stromal	LAMC1_Stromal	Stromal	0.0683034
COL18A1_Stromal~LUM_Stromal	COL18A1_Stromal	Stromal	LUM_Stromal	Stromal	0.358976
COL18A1_Stromal~MFAP2_Stromal	COL18A1_Stromal	Stromal	MFAP2_Stromal	Stromal	0.0440516
COL18A1_Stromal~MMP13_Stromal	COL18A1_Stromal	Stromal	MMP13_Stromal	Stromal	0.261656
COL18A1_Stromal~MMP2_Stromal	COL18A1_Stromal	Stromal	MMP2_Stromal	Stromal	0.23421
COL18A1_Stromal~MMP9_Stromal	COL18A1_Stromal	Stromal	MMP9_Stromal	Stromal	0.182531
COL18A1_Stromal~P4HB_Stromal	COL18A1_Stromal	Stromal	P4HB_Stromal	Stromal	0.206503
COL18A1_Stromal~PCOLCE_Stromal	COL18A1_Stromal	Stromal	PCOLCE_Stromal	Stromal	0.303062
COL18A1_Stromal~SDC4_Stromal	COL18A1_Stromal	Stromal	SDC4_Stromal	Stromal	0.0356491
COL18A1_Stromal~SMC3_Stromal	COL18A1_Stromal	Stromal	SMC3_Stromal	Stromal	0.0907239
COL18A1_Stromal~THBS1_Stromal	COL18A1_Stromal	Stromal	THBS1_Stromal	Stromal	0.0433368
COL18A1_Stromal~TNC_Stromal	COL18A1_Stromal	Stromal	TNC_Stromal	Stromal	0.23768
COL18A1_Stromal~VCAN_Stromal	COL18A1_Stromal	Stromal	VCAN_Stromal	Stromal	0.161849
COL1A1_Stromal~COL1A2_Stromal	COL1A1_Stromal	Stromal	COL1A2_Stromal	Stromal	0.805018
COL1A1_Stromal~COL3A1_Stromal	COL1A1_Stromal	Stromal	COL3A1_Stromal	Stromal	0.761985
COL1A1_Stromal~COL5A1_Stromal	COL1A1_Stromal	Stromal	COL5A1_Stromal	Stromal	0.636221
COL1A1_Stromal~COL5A2_Stromal	COL1A1_Stromal	Stromal	COL5A2_Stromal	Stromal	0.652124
COL1A1_Stromal~COL6A1_Stromal	COL1A1_Stromal	Stromal	COL6A1_Stromal	Stromal	0.70894
COL1A1_Stromal~COL6A2_Stromal	COL1A1_Stromal	Stromal	COL6A2_Stromal	Stromal	0.715372
COL1A1_Stromal~COL8A1_Stromal	COL1A1_Stromal	Stromal	COL8A1_Stromal	Stromal	0.478897
COL1A1_Stromal~COL8A2_Stromal	COL1A1_Stromal	Stromal	COL8A2_Stromal	Stromal	0.471621
COL1A1_Stromal~CRTAP_Stromal	COL1A1_Stromal	Stromal	CRTAP_Stromal	Stromal	0.487517
COL1A1_Stromal~DCN_Stromal	COL1A1_Stromal	Stromal	DCN_Stromal	Stromal	0.756348
COL1A1_Stromal~DDR2_Stromal	COL1A1_Stromal	Stromal	DDR2_Stromal	Stromal	0.484311
COL1A1_Stromal~FGF7_Stromal	COL1A1_Stromal	Stromal	FGF7_Stromal	Stromal	0.51949
COL1A1_Stromal~FN1_Stromal	COL1A1_Stromal	Stromal	FN1_Stromal	Stromal	0.752752
COL1A1_Stromal~GPC1_Stromal	COL1A1_Stromal	Stromal	GPC1_Stromal	Stromal	0.511375
COL1A1_Stromal~GPC4_Stromal	COL1A1_Stromal	Stromal	GPC4_Stromal	Stromal	0.446011
COL1A1_Stromal~HSPG2_Stromal	COL1A1_Stromal	Stromal	HSPG2_Stromal	Stromal	0.457316
COL1A1_Stromal~HTRA1_Stromal	COL1A1_Stromal	Stromal	HTRA1_Stromal	Stromal	0.631909
COL1A1_Stromal~ITGA10_Stromal	COL1A1_Stromal	Stromal	ITGA10_Stromal	Stromal	0.577553
COL1A1_Stromal~ITGA11_Stromal	COL1A1_Stromal	Stromal	ITGA11_Stromal	Stromal	0.528037
COL1A1_Stromal~ITGAE_Stromal	COL1A1_Stromal	Stromal	ITGAE_Stromal	Stromal	0.451402
COL1A1_Stromal~ITGAV_Stromal	COL1A1_Stromal	Stromal	ITGAV_Stromal	Stromal	0.497955
COL1A1_Stromal~ITGB1_Stromal	COL1A1_Stromal	Stromal	ITGB1_Stromal	Stromal	0.601688
COL1A1_Stromal~ITGB2_Stromal	COL1A1_Stromal	Stromal	ITGB2_Stromal	Stromal	0.450433
COL1A1_Stromal~ITGB5_Stromal	COL1A1_Stromal	Stromal	ITGB5_Stromal	Stromal	0.56505
COL1A1_Stromal~ITGBL1_Stromal	COL1A1_Stromal	Stromal	ITGBL1_Stromal	Stromal	0.458902
COL1A1_Stromal~LAMA4_Stromal	COL1A1_Stromal	Stromal	LAMA4_Stromal	Stromal	0.534413
COL1A1_Stromal~LAMB1_Stromal	COL1A1_Stromal	Stromal	LAMB1_Stromal	Stromal	0.487708
COL1A1_Stromal~LAMB2_Stromal	COL1A1_Stromal	Stromal	LAMB2_Stromal	Stromal	0.542303
COL1A1_Stromal~LAMC1_Stromal	COL1A1_Stromal	Stromal	LAMC1_Stromal	Stromal	0.459993
COL1A1_Stromal~LOX_Stromal	COL1A1_Stromal	Stromal	LOX_Stromal	Stromal	0.424757
COL1A1_Stromal~LUM_Stromal	COL1A1_Stromal	Stromal	LUM_Stromal	Stromal	0.750666
COL1A1_Stromal~MATN2_Stromal	COL1A1_Stromal	Stromal	MATN2_Stromal	Stromal	0.454435
COL1A1_Stromal~MMP2_Stromal	COL1A1_Stromal	Stromal	MMP2_Stromal	Stromal	0.6259
COL1A1_Stromal~MMP9_Stromal	COL1A1_Stromal	Stromal	MMP9_Stromal	Stromal	0.574221
COL1A1_Stromal~NID1_Stromal	COL1A1_Stromal	Stromal	NID1_Stromal	Stromal	0.44669
COL1A1_Stromal~NID2_Stromal	COL1A1_Stromal	Stromal	NID2_Stromal	Stromal	0.438724
COL1A1_Stromal~P4HB_Stromal	COL1A1_Stromal	Stromal	P4HB_Stromal	Stromal	0.598193
COL1A1_Stromal~PDGFA_Stromal	COL1A1_Stromal	Stromal	PDGFA_Stromal	Stromal	0.433938
COL1A1_Stromal~SDC4_Stromal	COL1A1_Stromal	Stromal	SDC4_Stromal	Stromal	0.427339
COL1A1_Stromal~SMC3_Stromal	COL1A1_Stromal	Stromal	SMC3_Stromal	Stromal	0.482414
COL1A1_Stromal~SPARC_Stromal	COL1A1_Stromal	Stromal	SPARC_Stromal	Stromal	0.75415
COL1A1_Stromal~TGFB2_Stromal	COL1A1_Stromal	Stromal	TGFB2_Stromal	Stromal	0.496546
COL1A1_Stromal~TGFBI_Stromal	COL1A1_Stromal	Stromal	TGFBI_Stromal	Stromal	0.598287
COL1A1_Stromal~THBS1_Stromal	COL1A1_Stromal	Stromal	THBS1_Stromal	Stromal	0.435027
COL1A1_Stromal~TNC_Stromal	COL1A1_Stromal	Stromal	TNC_Stromal	Stromal	0.62937
COL1A1_Stromal~VCAN_Stromal	COL1A1_Stromal	Stromal	VCAN_Stromal	Stromal	0.553538
COL1A2_Stromal~COL3A1_Stromal	COL1A2_Stromal	Stromal	COL3A1_Stromal	Stromal	0.739511
COL1A2_Stromal~COL5A1_Stromal	COL1A2_Stromal	Stromal	COL5A1_Stromal	Stromal	0.613748
COL1A2_Stromal~COL5A2_Stromal	COL1A2_Stromal	Stromal	COL5A2_Stromal	Stromal	0.62965
COL1A2_Stromal~COL5A3_Stromal	COL1A2_Stromal	Stromal	COL5A3_Stromal	Stromal	0.457346
COL1A2_Stromal~COL6A1_Stromal	COL1A2_Stromal	Stromal	COL6A1_Stromal	Stromal	0.686466
COL1A2_Stromal~COL6A2_Stromal	COL1A2_Stromal	Stromal	COL6A2_Stromal	Stromal	0.692898
COL1A2_Stromal~COL8A1_Stromal	COL1A2_Stromal	Stromal	COL8A1_Stromal	Stromal	0.456423
COL1A2_Stromal~COL8A2_Stromal	COL1A2_Stromal	Stromal	COL8A2_Stromal	Stromal	0.449147
COL1A2_Stromal~CRTAP_Stromal	COL1A2_Stromal	Stromal	CRTAP_Stromal	Stromal	0.465043
COL1A2_Stromal~DCN_Stromal	COL1A2_Stromal	Stromal	DCN_Stromal	Stromal	0.733874
COL1A2_Stromal~FN1_Stromal	COL1A2_Stromal	Stromal	FN1_Stromal	Stromal	0.730278
COL1A2_Stromal~GPC1_Stromal	COL1A2_Stromal	Stromal	GPC1_Stromal	Stromal	0.488901
COL1A2_Stromal~GPC4_Stromal	COL1A2_Stromal	Stromal	GPC4_Stromal	Stromal	0.423537
COL1A2_Stromal~HSPG2_Stromal	COL1A2_Stromal	Stromal	HSPG2_Stromal	Stromal	0.434842
COL1A2_Stromal~ITGA10_Stromal	COL1A2_Stromal	Stromal	ITGA10_Stromal	Stromal	0.55508
COL1A2_Stromal~ITGA11_Stromal	COL1A2_Stromal	Stromal	ITGA11_Stromal	Stromal	0.505564
COL1A2_Stromal~ITGAE_Stromal	COL1A2_Stromal	Stromal	ITGAE_Stromal	Stromal	0.428928
COL1A2_Stromal~ITGAV_Stromal	COL1A2_Stromal	Stromal	ITGAV_Stromal	Stromal	0.475481
COL1A2_Stromal~ITGB1_Stromal	COL1A2_Stromal	Stromal	ITGB1_Stromal	Stromal	0.579214
COL1A2_Stromal~ITGB2_Stromal	COL1A2_Stromal	Stromal	ITGB2_Stromal	Stromal	0.42796
COL1A2_Stromal~ITGB5_Stromal	COL1A2_Stromal	Stromal	ITGB5_Stromal	Stromal	0.542576
COL1A2_Stromal~ITGBL1_Stromal	COL1A2_Stromal	Stromal	ITGBL1_Stromal	Stromal	0.436428
COL1A2_Stromal~LAMA4_Stromal	COL1A2_Stromal	Stromal	LAMA4_Stromal	Stromal	0.511939
COL1A2_Stromal~LAMB1_Stromal	COL1A2_Stromal	Stromal	LAMB1_Stromal	Stromal	0.465234
COL1A2_Stromal~LAMB2_Stromal	COL1A2_Stromal	Stromal	LAMB2_Stromal	Stromal	0.519829
COL1A2_Stromal~LAMC1_Stromal	COL1A2_Stromal	Stromal	LAMC1_Stromal	Stromal	0.43752
COL1A2_Stromal~LOX_Stromal	COL1A2_Stromal	Stromal	LOX_Stromal	Stromal	0.402284
COL1A2_Stromal~LUM_Stromal	COL1A2_Stromal	Stromal	LUM_Stromal	Stromal	0.728192
COL1A2_Stromal~MMP14_Stromal	COL1A2_Stromal	Stromal	MMP14_Stromal	Stromal	0.560531
COL1A2_Stromal~MMP16_Stromal	COL1A2_Stromal	Stromal	MMP16_Stromal	Stromal	0.396768
COL1A2_Stromal~MMP2_Stromal	COL1A2_Stromal	Stromal	MMP2_Stromal	Stromal	0.603426
COL1A2_Stromal~MMP9_Stromal	COL1A2_Stromal	Stromal	MMP9_Stromal	Stromal	0.551747
COL1A2_Stromal~P4HB_Stromal	COL1A2_Stromal	Stromal	P4HB_Stromal	Stromal	0.575719
COL1A2_Stromal~PDGFA_Stromal	COL1A2_Stromal	Stromal	PDGFA_Stromal	Stromal	0.411465
COL1A2_Stromal~SDC4_Stromal	COL1A2_Stromal	Stromal	SDC4_Stromal	Stromal	0.404865
COL1A2_Stromal~SMC3_Stromal	COL1A2_Stromal	Stromal	SMC3_Stromal	Stromal	0.45994
COL1A2_Stromal~SPARC_Stromal	COL1A2_Stromal	Stromal	SPARC_Stromal	Stromal	0.731676
COL1A2_Stromal~TGFBI_Stromal	COL1A2_Stromal	Stromal	TGFBI_Stromal	Stromal	0.575813
COL1A2_Stromal~TNC_Stromal	COL1A2_Stromal	Stromal	TNC_Stromal	Stromal	0.606896
COL1A2_Stromal~VCAN_Stromal	COL1A2_Stromal	Stromal	VCAN_Stromal	Stromal	0.531065
COL27A1_Stromal~CRTAP_Stromal	COL27A1_Stromal	Stromal	CRTAP_Stromal	Stromal	0.123416
COL27A1_Stromal~FN1_Stromal	COL27A1_Stromal	Stromal	FN1_Stromal	Stromal	0.388651
COL27A1_Stromal~ITGA10_Stromal	COL27A1_Stromal	Stromal	ITGA10_Stromal	Stromal	0.213453
COL27A1_Stromal~ITGA11_Stromal	COL27A1_Stromal	Stromal	ITGA11_Stromal	Stromal	0.163937
COL27A1_Stromal~ITGAE_Stromal	COL27A1_Stromal	Stromal	ITGAE_Stromal	Stromal	0.0873014
COL27A1_Stromal~ITGAV_Stromal	COL27A1_Stromal	Stromal	ITGAV_Stromal	Stromal	0.133854
COL27A1_Stromal~ITGB1_Stromal	COL27A1_Stromal	Stromal	ITGB1_Stromal	Stromal	0.237588
COL27A1_Stromal~ITGB2_Stromal	COL27A1_Stromal	Stromal	ITGB2_Stromal	Stromal	0.0863331
COL27A1_Stromal~ITGB5_Stromal	COL27A1_Stromal	Stromal	ITGB5_Stromal	Stromal	0.200949
COL27A1_Stromal~ITGBL1_Stromal	COL27A1_Stromal	Stromal	ITGBL1_Stromal	Stromal	0.0948015
COL27A1_Stromal~LAMA4_Stromal	COL27A1_Stromal	Stromal	LAMA4_Stromal	Stromal	0.170313
COL27A1_Stromal~LAMB1_Stromal	COL27A1_Stromal	Stromal	LAMB1_Stromal	Stromal	0.123607
COL27A1_Stromal~LAMB2_Stromal	COL27A1_Stromal	Stromal	LAMB2_Stromal	Stromal	0.178202
COL27A1_Stromal~LAMC1_Stromal	COL27A1_Stromal	Stromal	LAMC1_Stromal	Stromal	0.0958928
COL27A1_Stromal~P4HB_Stromal	COL27A1_Stromal	Stromal	P4HB_Stromal	Stromal	0.234093
COL3A1_Stromal~COL5A1_Stromal	COL3A1_Stromal	Stromal	COL5A1_Stromal	Stromal	0.570715
COL3A1_Stromal~COL5A2_Stromal	COL3A1_Stromal	Stromal	COL5A2_Stromal	Stromal	0.586617
COL3A1_Stromal~COL6A1_Stromal	COL3A1_Stromal	Stromal	COL6A1_Stromal	Stromal	0.643434
COL3A1_Stromal~COL6A2_Stromal	COL3A1_Stromal	Stromal	COL6A2_Stromal	Stromal	0.649865
COL3A1_Stromal~COL8A1_Stromal	COL3A1_Stromal	Stromal	COL8A1_Stromal	Stromal	0.413391
COL3A1_Stromal~COL8A2_Stromal	COL3A1_Stromal	Stromal	COL8A2_Stromal	Stromal	0.406114
COL3A1_Stromal~CRTAP_Stromal	COL3A1_Stromal	Stromal	CRTAP_Stromal	Stromal	0.42201
COL3A1_Stromal~DCN_Stromal	COL3A1_Stromal	Stromal	DCN_Stromal	Stromal	0.690841
COL3A1_Stromal~DDR2_Stromal	COL3A1_Stromal	Stromal	DDR2_Stromal	Stromal	0.418804
COL3A1_Stromal~FGF7_Stromal	COL3A1_Stromal	Stromal	FGF7_Stromal	Stromal	0.453984
COL3A1_Stromal~FN1_Stromal	COL3A1_Stromal	Stromal	FN1_Stromal	Stromal	0.687245
COL3A1_Stromal~GPC1_Stromal	COL3A1_Stromal	Stromal	GPC1_Stromal	Stromal	0.445868
COL3A1_Stromal~GPC4_Stromal	COL3A1_Stromal	Stromal	GPC4_Stromal	Stromal	0.380505
COL3A1_Stromal~HSPG2_Stromal	COL3A1_Stromal	Stromal	HSPG2_Stromal	Stromal	0.39181
COL3A1_Stromal~HTRA1_Stromal	COL3A1_Stromal	Stromal	HTRA1_Stromal	Stromal	0.566403
COL3A1_Stromal~ITGA10_Stromal	COL3A1_Stromal	Stromal	ITGA10_Stromal	Stromal	0.512047
COL3A1_Stromal~ITGA11_Stromal	COL3A1_Stromal	Stromal	ITGA11_Stromal	Stromal	0.462531
COL3A1_Stromal~ITGAE_Stromal	COL3A1_Stromal	Stromal	ITGAE_Stromal	Stromal	0.385895
COL3A1_Stromal~ITGAV_Stromal	COL3A1_Stromal	Stromal	ITGAV_Stromal	Stromal	0.432448
COL3A1_Stromal~ITGB1_Stromal	COL3A1_Stromal	Stromal	ITGB1_Stromal	Stromal	0.536182
COL3A1_Stromal~ITGB2_Stromal	COL3A1_Stromal	Stromal	ITGB2_Stromal	Stromal	0.384927
COL3A1_Stromal~ITGB5_Stromal	COL3A1_Stromal	Stromal	ITGB5_Stromal	Stromal	0.499543
COL3A1_Stromal~ITGBL1_Stromal	COL3A1_Stromal	Stromal	ITGBL1_Stromal	Stromal	0.393396
COL3A1_Stromal~LAMA4_Stromal	COL3A1_Stromal	Stromal	LAMA4_Stromal	Stromal	0.468907
COL3A1_Stromal~LAMB1_Stromal	COL3A1_Stromal	Stromal	LAMB1_Stromal	Stromal	0.422201
COL3A1_Stromal~LAMB2_Stromal	COL3A1_Stromal	Stromal	LAMB2_Stromal	Stromal	0.476797
COL3A1_Stromal~LAMC1_Stromal	COL3A1_Stromal	Stromal	LAMC1_Stromal	Stromal	0.394487
COL3A1_Stromal~LOX_Stromal	COL3A1_Stromal	Stromal	LOX_Stromal	Stromal	0.359251
COL3A1_Stromal~LUM_Stromal	COL3A1_Stromal	Stromal	LUM_Stromal	Stromal	0.68516
COL3A1_Stromal~P4HB_Stromal	COL3A1_Stromal	Stromal	P4HB_Stromal	Stromal	0.532687
COL3A1_Stromal~PCOLCE_Stromal	COL3A1_Stromal	Stromal	PCOLCE_Stromal	Stromal	0.629245
COL3A1_Stromal~PDGFA_Stromal	COL3A1_Stromal	Stromal	PDGFA_Stromal	Stromal	0.368432
COL3A1_Stromal~SDC4_Stromal	COL3A1_Stromal	Stromal	SDC4_Stromal	Stromal	0.361833
COL3A1_Stromal~SMC3_Stromal	COL3A1_Stromal	Stromal	SMC3_Stromal	Stromal	0.416907
COL3A1_Stromal~SPARC_Stromal	COL3A1_Stromal	Stromal	SPARC_Stromal	Stromal	0.688643
COL3A1_Stromal~THBS1_Stromal	COL3A1_Stromal	Stromal	THBS1_Stromal	Stromal	0.36952
COL3A1_Stromal~TNC_Stromal	COL3A1_Stromal	Stromal	TNC_Stromal	Stromal	0.563864
COL3A1_Stromal~VCAN_Stromal	COL3A1_Stromal	Stromal	VCAN_Stromal	Stromal	0.488032
COL5A1_Stromal~COL5A2_Stromal	COL5A1_Stromal	Stromal	COL5A2_Stromal	Stromal	0.460854
COL5A1_Stromal~COL5A3_Stromal	COL5A1_Stromal	Stromal	COL5A3_Stromal	Stromal	0.28855
COL5A1_Stromal~COL6A1_Stromal	COL5A1_Stromal	Stromal	COL6A1_Stromal	Stromal	0.51767
COL5A1_Stromal~COL6A2_Stromal	COL5A1_Stromal	Stromal	COL6A2_Stromal	Stromal	0.524102
COL5A1_Stromal~COL8A1_Stromal	COL5A1_Stromal	Stromal	COL8A1_Stromal	Stromal	0.287627
COL5A1_Stromal~COL8A2_Stromal	COL5A1_Stromal	Stromal	COL8A2_Stromal	Stromal	0.280351
COL5A1_Stromal~CRTAP_Stromal	COL5A1_Stromal	Stromal	CRTAP_Stromal	Stromal	0.296247
COL5A1_Stromal~CTSD_Stromal	COL5A1_Stromal	Stromal	CTSD_Stromal	Stromal	0.373308
COL5A1_Stromal~DCN_Stromal	COL5A1_Stromal	Stromal	DCN_Stromal	Stromal	0.565078
COL5A1_Stromal~DPP7_Stromal	COL5A1_Stromal	Stromal	DPP7_Stromal	Stromal	0.332884
COL5A1_Stromal~FBN1_Stromal	COL5A1_Stromal	Stromal	FBN1_Stromal	Stromal	0.376117
COL5A1_Stromal~FN1_Stromal	COL5A1_Stromal	Stromal	FN1_Stromal	Stromal	0.561482
COL5A1_Stromal~GPC1_Stromal	COL5A1_Stromal	Stromal	GPC1_Stromal	Stromal	0.320105
COL5A1_Stromal~GPC4_Stromal	COL5A1_Stromal	Stromal	GPC4_Stromal	Stromal	0.254741
COL5A1_Stromal~HSPG2_Stromal	COL5A1_Stromal	Stromal	HSPG2_Stromal	Stromal	0.266046
COL5A1_Stromal~ITGA10_Stromal	COL5A1_Stromal	Stromal	ITGA10_Stromal	Stromal	0.386283
COL5A1_Stromal~ITGA11_Stromal	COL5A1_Stromal	Stromal	ITGA11_Stromal	Stromal	0.336767
COL5A1_Stromal~ITGAE_Stromal	COL5A1_Stromal	Stromal	ITGAE_Stromal	Stromal	0.260132
COL5A1_Stromal~ITGAV_Stromal	COL5A1_Stromal	Stromal	ITGAV_Stromal	Stromal	0.306685
COL5A1_Stromal~ITGB1_Stromal	COL5A1_Stromal	Stromal	ITGB1_Stromal	Stromal	0.410418
COL5A1_Stromal~ITGB2_Stromal	COL5A1_Stromal	Stromal	ITGB2_Stromal	Stromal	0.259164
COL5A1_Stromal~ITGB5_Stromal	COL5A1_Stromal	Stromal	ITGB5_Stromal	Stromal	0.37378
COL5A1_Stromal~ITGBL1_Stromal	COL5A1_Stromal	Stromal	ITGBL1_Stromal	Stromal	0.267632
COL5A1_Stromal~LAMA4_Stromal	COL5A1_Stromal	Stromal	LAMA4_Stromal	Stromal	0.343143
COL5A1_Stromal~LAMB1_Stromal	COL5A1_Stromal	Stromal	LAMB1_Stromal	Stromal	0.296438
COL5A1_Stromal~LAMB2_Stromal	COL5A1_Stromal	Stromal	LAMB2_Stromal	Stromal	0.351033
COL5A1_Stromal~LAMC1_Stromal	COL5A1_Stromal	Stromal	LAMC1_Stromal	Stromal	0.268723
COL5A1_Stromal~LEPRE1_Stromal	COL5A1_Stromal	Stromal	LEPRE1_Stromal	Stromal	0.302226
COL5A1_Stromal~LGALS3BP_Stromal	COL5A1_Stromal	Stromal	LGALS3BP_Stromal	Stromal	0.395318
COL5A1_Stromal~LUM_Stromal	COL5A1_Stromal	Stromal	LUM_Stromal	Stromal	0.559396
COL5A1_Stromal~M6PR_Stromal	COL5A1_Stromal	Stromal	M6PR_Stromal	Stromal	0.225741
COL5A1_Stromal~P4HB_Stromal	COL5A1_Stromal	Stromal	P4HB_Stromal	Stromal	0.406923
COL5A1_Stromal~PDGFA_Stromal	COL5A1_Stromal	Stromal	PDGFA_Stromal	Stromal	0.242669
COL5A1_Stromal~PLXNB2_Stromal	COL5A1_Stromal	Stromal	PLXNB2_Stromal	Stromal	0.306124
COL5A1_Stromal~PPT1_Stromal	COL5A1_Stromal	Stromal	PPT1_Stromal	Stromal	0.264605
COL5A1_Stromal~PSAP_Stromal	COL5A1_Stromal	Stromal	PSAP_Stromal	Stromal	0.438633
COL5A1_Stromal~SDC4_Stromal	COL5A1_Stromal	Stromal	SDC4_Stromal	Stromal	0.236069
COL5A1_Stromal~SMC3_Stromal	COL5A1_Stromal	Stromal	SMC3_Stromal	Stromal	0.291144
COL5A1_Stromal~SPARC_Stromal	COL5A1_Stromal	Stromal	SPARC_Stromal	Stromal	0.56288
COL5A1_Stromal~THBS1_Stromal	COL5A1_Stromal	Stromal	THBS1_Stromal	Stromal	0.243757
COL5A1_Stromal~TNC_Stromal	COL5A1_Stromal	Stromal	TNC_Stromal	Stromal	0.4381
COL5A1_Stromal~VCAN_Stromal	COL5A1_Stromal	Stromal	VCAN_Stromal	Stromal	0.362269
COL5A2_Stromal~COL5A3_Stromal	COL5A2_Stromal	Stromal	COL5A3_Stromal	Stromal	0.304452
COL5A2_Stromal~COL6A1_Stromal	COL5A2_Stromal	Stromal	COL6A1_Stromal	Stromal	0.533572
COL5A2_Stromal~COL6A2_Stromal	COL5A2_Stromal	Stromal	COL6A2_Stromal	Stromal	0.540004
COL5A2_Stromal~COL8A1_Stromal	COL5A2_Stromal	Stromal	COL8A1_Stromal	Stromal	0.30353
COL5A2_Stromal~COL8A2_Stromal	COL5A2_Stromal	Stromal	COL8A2_Stromal	Stromal	0.296253
COL5A2_Stromal~CRTAP_Stromal	COL5A2_Stromal	Stromal	CRTAP_Stromal	Stromal	0.312149
COL5A2_Stromal~DCN_Stromal	COL5A2_Stromal	Stromal	DCN_Stromal	Stromal	0.58098
COL5A2_Stromal~FN1_Stromal	COL5A2_Stromal	Stromal	FN1_Stromal	Stromal	0.577384
COL5A2_Stromal~GPC1_Stromal	COL5A2_Stromal	Stromal	GPC1_Stromal	Stromal	0.336007
COL5A2_Stromal~GPC4_Stromal	COL5A2_Stromal	Stromal	GPC4_Stromal	Stromal	0.270644
COL5A2_Stromal~HSPG2_Stromal	COL5A2_Stromal	Stromal	HSPG2_Stromal	Stromal	0.281948
COL5A2_Stromal~ITGA10_Stromal	COL5A2_Stromal	Stromal	ITGA10_Stromal	Stromal	0.402186
COL5A2_Stromal~ITGA11_Stromal	COL5A2_Stromal	Stromal	ITGA11_Stromal	Stromal	0.35267
COL5A2_Stromal~ITGAE_Stromal	COL5A2_Stromal	Stromal	ITGAE_Stromal	Stromal	0.276034
COL5A2_Stromal~ITGAV_Stromal	COL5A2_Stromal	Stromal	ITGAV_Stromal	Stromal	0.322587
COL5A2_Stromal~ITGB1_Stromal	COL5A2_Stromal	Stromal	ITGB1_Stromal	Stromal	0.426321
COL5A2_Stromal~ITGB2_Stromal	COL5A2_Stromal	Stromal	ITGB2_Stromal	Stromal	0.275066
COL5A2_Stromal~ITGB5_Stromal	COL5A2_Stromal	Stromal	ITGB5_Stromal	Stromal	0.389682
COL5A2_Stromal~ITGBL1_Stromal	COL5A2_Stromal	Stromal	ITGBL1_Stromal	Stromal	0.283534
COL5A2_Stromal~LAMA4_Stromal	COL5A2_Stromal	Stromal	LAMA4_Stromal	Stromal	0.359045
COL5A2_Stromal~LAMB1_Stromal	COL5A2_Stromal	Stromal	LAMB1_Stromal	Stromal	0.31234
COL5A2_Stromal~LAMB2_Stromal	COL5A2_Stromal	Stromal	LAMB2_Stromal	Stromal	0.366935
COL5A2_Stromal~LAMC1_Stromal	COL5A2_Stromal	Stromal	LAMC1_Stromal	Stromal	0.284626
COL5A2_Stromal~LUM_Stromal	COL5A2_Stromal	Stromal	LUM_Stromal	Stromal	0.575298
COL5A2_Stromal~P4HB_Stromal	COL5A2_Stromal	Stromal	P4HB_Stromal	Stromal	0.422825
COL5A2_Stromal~SDC4_Stromal	COL5A2_Stromal	Stromal	SDC4_Stromal	Stromal	0.251971
COL5A2_Stromal~SMC3_Stromal	COL5A2_Stromal	Stromal	SMC3_Stromal	Stromal	0.307046
COL5A2_Stromal~TNC_Stromal	COL5A2_Stromal	Stromal	TNC_Stromal	Stromal	0.454003
COL5A2_Stromal~VCAN_Stromal	COL5A2_Stromal	Stromal	VCAN_Stromal	Stromal	0.378171
COL5A3_Stromal~CRTAP_Stromal	COL5A3_Stromal	Stromal	CRTAP_Stromal	Stromal	0.139846
COL5A3_Stromal~FN1_Stromal	COL5A3_Stromal	Stromal	FN1_Stromal	Stromal	0.405081
COL5A3_Stromal~ITGA10_Stromal	COL5A3_Stromal	Stromal	ITGA10_Stromal	Stromal	0.229882
COL5A3_Stromal~ITGA11_Stromal	COL5A3_Stromal	Stromal	ITGA11_Stromal	Stromal	0.180366
COL5A3_Stromal~ITGAE_Stromal	COL5A3_Stromal	Stromal	ITGAE_Stromal	Stromal	0.103731
COL5A3_Stromal~ITGAV_Stromal	COL5A3_Stromal	Stromal	ITGAV_Stromal	Stromal	0.150283
COL5A3_Stromal~ITGB1_Stromal	COL5A3_Stromal	Stromal	ITGB1_Stromal	Stromal	0.254017
COL5A3_Stromal~ITGB2_Stromal	COL5A3_Stromal	Stromal	ITGB2_Stromal	Stromal	0.102762
COL5A3_Stromal~ITGB5_Stromal	COL5A3_Stromal	Stromal	ITGB5_Stromal	Stromal	0.217379
COL5A3_Stromal~ITGBL1_Stromal	COL5A3_Stromal	Stromal	ITGBL1_Stromal	Stromal	0.111231
COL5A3_Stromal~LAMA4_Stromal	COL5A3_Stromal	Stromal	LAMA4_Stromal	Stromal	0.186742
COL5A3_Stromal~LAMB1_Stromal	COL5A3_Stromal	Stromal	LAMB1_Stromal	Stromal	0.140037
COL5A3_Stromal~LAMB2_Stromal	COL5A3_Stromal	Stromal	LAMB2_Stromal	Stromal	0.194632
COL5A3_Stromal~LAMC1_Stromal	COL5A3_Stromal	Stromal	LAMC1_Stromal	Stromal	0.112322
COL5A3_Stromal~P4HB_Stromal	COL5A3_Stromal	Stromal	P4HB_Stromal	Stromal	0.250522
COL6A1_Stromal~COL6A2_Stromal	COL6A1_Stromal	Stromal	COL6A2_Stromal	Stromal	0.59682
COL6A1_Stromal~COL6A3_Stromal	COL6A1_Stromal	Stromal	COL6A3_Stromal	Stromal	0.519759
COL6A1_Stromal~COL8A1_Stromal	COL6A1_Stromal	Stromal	COL8A1_Stromal	Stromal	0.360346
COL6A1_Stromal~COL8A2_Stromal	COL6A1_Stromal	Stromal	COL8A2_Stromal	Stromal	0.35307
COL6A1_Stromal~CRTAP_Stromal	COL6A1_Stromal	Stromal	CRTAP_Stromal	Stromal	0.368965
COL6A1_Stromal~DCN_Stromal	COL6A1_Stromal	Stromal	DCN_Stromal	Stromal	0.637796
COL6A1_Stromal~FGF7_Stromal	COL6A1_Stromal	Stromal	FGF7_Stromal	Stromal	0.400939
COL6A1_Stromal~FN1_Stromal	COL6A1_Stromal	Stromal	FN1_Stromal	Stromal	0.6342
COL6A1_Stromal~GPC1_Stromal	COL6A1_Stromal	Stromal	GPC1_Stromal	Stromal	0.392823
COL6A1_Stromal~GPC4_Stromal	COL6A1_Stromal	Stromal	GPC4_Stromal	Stromal	0.32746
COL6A1_Stromal~HSPG2_Stromal	COL6A1_Stromal	Stromal	HSPG2_Stromal	Stromal	0.338765
COL6A1_Stromal~ITGA10_Stromal	COL6A1_Stromal	Stromal	ITGA10_Stromal	Stromal	0.459002
COL6A1_Stromal~ITGA11_Stromal	COL6A1_Stromal	Stromal	ITGA11_Stromal	Stromal	0.409486
COL6A1_Stromal~ITGAE_Stromal	COL6A1_Stromal	Stromal	ITGAE_Stromal	Stromal	0.33285
COL6A1_Stromal~ITGAV_Stromal	COL6A1_Stromal	Stromal	ITGAV_Stromal	Stromal	0.379403
COL6A1_Stromal~ITGB1_Stromal	COL6A1_Stromal	Stromal	ITGB1_Stromal	Stromal	0.483137
COL6A1_Stromal~ITGB2_Stromal	COL6A1_Stromal	Stromal	ITGB2_Stromal	Stromal	0.331882
COL6A1_Stromal~ITGB5_Stromal	COL6A1_Stromal	Stromal	ITGB5_Stromal	Stromal	0.446499
COL6A1_Stromal~ITGBL1_Stromal	COL6A1_Stromal	Stromal	ITGBL1_Stromal	Stromal	0.340351
COL6A1_Stromal~LAMA4_Stromal	COL6A1_Stromal	Stromal	LAMA4_Stromal	Stromal	0.415862
COL6A1_Stromal~LAMB1_Stromal	COL6A1_Stromal	Stromal	LAMB1_Stromal	Stromal	0.369157
COL6A1_Stromal~LAMB2_Stromal	COL6A1_Stromal	Stromal	LAMB2_Stromal	Stromal	0.423752
COL6A1_Stromal~LAMC1_Stromal	COL6A1_Stromal	Stromal	LAMC1_Stromal	Stromal	0.341442
COL6A1_Stromal~LGALS3BP_Stromal	COL6A1_Stromal	Stromal	LGALS3BP_Stromal	Stromal	0.468037
COL6A1_Stromal~LUM_Stromal	COL6A1_Stromal	Stromal	LUM_Stromal	Stromal	0.632115
COL6A1_Stromal~P4HB_Stromal	COL6A1_Stromal	Stromal	P4HB_Stromal	Stromal	0.479642
COL6A1_Stromal~PDGFA_Stromal	COL6A1_Stromal	Stromal	PDGFA_Stromal	Stromal	0.315387
COL6A1_Stromal~SDC4_Stromal	COL6A1_Stromal	Stromal	SDC4_Stromal	Stromal	0.308788
COL6A1_Stromal~SMC3_Stromal	COL6A1_Stromal	Stromal	SMC3_Stromal	Stromal	0.363862
COL6A1_Stromal~TNC_Stromal	COL6A1_Stromal	Stromal	TNC_Stromal	Stromal	0.510819
COL6A1_Stromal~VCAN_Stromal	COL6A1_Stromal	Stromal	VCAN_Stromal	Stromal	0.434987
COL6A2_Stromal~COL6A3_Stromal	COL6A2_Stromal	Stromal	COL6A3_Stromal	Stromal	0.526191
COL6A2_Stromal~COL8A1_Stromal	COL6A2_Stromal	Stromal	COL8A1_Stromal	Stromal	0.366777
COL6A2_Stromal~COL8A2_Stromal	COL6A2_Stromal	Stromal	COL8A2_Stromal	Stromal	0.359501
COL6A2_Stromal~CRTAP_Stromal	COL6A2_Stromal	Stromal	CRTAP_Stromal	Stromal	0.375397
COL6A2_Stromal~DCN_Stromal	COL6A2_Stromal	Stromal	DCN_Stromal	Stromal	0.644228
COL6A2_Stromal~FN1_Stromal	COL6A2_Stromal	Stromal	FN1_Stromal	Stromal	0.640632
COL6A2_Stromal~GPC1_Stromal	COL6A2_Stromal	Stromal	GPC1_Stromal	Stromal	0.399255
COL6A2_Stromal~GPC4_Stromal	COL6A2_Stromal	Stromal	GPC4_Stromal	Stromal	0.333891
COL6A2_Stromal~HSPG2_Stromal	COL6A2_Stromal	Stromal	HSPG2_Stromal	Stromal	0.345196
COL6A2_Stromal~ITGA10_Stromal	COL6A2_Stromal	Stromal	ITGA10_Stromal	Stromal	0.465433
COL6A2_Stromal~ITGA11_Stromal	COL6A2_Stromal	Stromal	ITGA11_Stromal	Stromal	0.415918
COL6A2_Stromal~ITGAE_Stromal	COL6A2_Stromal	Stromal	ITGAE_Stromal	Stromal	0.339282
COL6A2_Stromal~ITGAV_Stromal	COL6A2_Stromal	Stromal	ITGAV_Stromal	Stromal	0.385835
COL6A2_Stromal~ITGB1_Stromal	COL6A2_Stromal	Stromal	ITGB1_Stromal	Stromal	0.489568
COL6A2_Stromal~ITGB2_Stromal	COL6A2_Stromal	Stromal	ITGB2_Stromal	Stromal	0.338314
COL6A2_Stromal~ITGB5_Stromal	COL6A2_Stromal	Stromal	ITGB5_Stromal	Stromal	0.45293
COL6A2_Stromal~ITGBL1_Stromal	COL6A2_Stromal	Stromal	ITGBL1_Stromal	Stromal	0.346782
COL6A2_Stromal~LAMA4_Stromal	COL6A2_Stromal	Stromal	LAMA4_Stromal	Stromal	0.422293
COL6A2_Stromal~LAMB1_Stromal	COL6A2_Stromal	Stromal	LAMB1_Stromal	Stromal	0.375588
COL6A2_Stromal~LAMB2_Stromal	COL6A2_Stromal	Stromal	LAMB2_Stromal	Stromal	0.430183
COL6A2_Stromal~LAMC1_Stromal	COL6A2_Stromal	Stromal	LAMC1_Stromal	Stromal	0.347873
COL6A2_Stromal~LUM_Stromal	COL6A2_Stromal	Stromal	LUM_Stromal	Stromal	0.638546
COL6A2_Stromal~P4HB_Stromal	COL6A2_Stromal	Stromal	P4HB_Stromal	Stromal	0.486073
COL6A2_Stromal~PDGFA_Stromal	COL6A2_Stromal	Stromal	PDGFA_Stromal	Stromal	0.321819
COL6A2_Stromal~SDC4_Stromal	COL6A2_Stromal	Stromal	SDC4_Stromal	Stromal	0.315219
COL6A2_Stromal~SMC3_Stromal	COL6A2_Stromal	Stromal	SMC3_Stromal	Stromal	0.370294
COL6A2_Stromal~TNC_Stromal	COL6A2_Stromal	Stromal	TNC_Stromal	Stromal	0.51725
COL6A2_Stromal~VCAN_Stromal	COL6A2_Stromal	Stromal	VCAN_Stromal	Stromal	0.441419
COL6A2_Stromal~VEGFB_Stromal	COL6A2_Stromal	Stromal	VEGFB_Stromal	Stromal	0.304814
COL6A3_Stromal~CRTAP_Stromal	COL6A3_Stromal	Stromal	CRTAP_Stromal	Stromal	0.298336
COL6A3_Stromal~FN1_Stromal	COL6A3_Stromal	Stromal	FN1_Stromal	Stromal	0.563571
COL6A3_Stromal~ITGA10_Stromal	COL6A3_Stromal	Stromal	ITGA10_Stromal	Stromal	0.388372
COL6A3_Stromal~ITGA11_Stromal	COL6A3_Stromal	Stromal	ITGA11_Stromal	Stromal	0.338857
COL6A3_Stromal~ITGAE_Stromal	COL6A3_Stromal	Stromal	ITGAE_Stromal	Stromal	0.262221
COL6A3_Stromal~ITGAV_Stromal	COL6A3_Stromal	Stromal	ITGAV_Stromal	Stromal	0.308774
COL6A3_Stromal~ITGB1_Stromal	COL6A3_Stromal	Stromal	ITGB1_Stromal	Stromal	0.412507
COL6A3_Stromal~ITGB2_Stromal	COL6A3_Stromal	Stromal	ITGB2_Stromal	Stromal	0.261253
COL6A3_Stromal~ITGB5_Stromal	COL6A3_Stromal	Stromal	ITGB5_Stromal	Stromal	0.375869
COL6A3_Stromal~ITGBL1_Stromal	COL6A3_Stromal	Stromal	ITGBL1_Stromal	Stromal	0.269721
COL6A3_Stromal~LAMA4_Stromal	COL6A3_Stromal	Stromal	LAMA4_Stromal	Stromal	0.345232
COL6A3_Stromal~LAMB1_Stromal	COL6A3_Stromal	Stromal	LAMB1_Stromal	Stromal	0.298527
COL6A3_Stromal~LAMB2_Stromal	COL6A3_Stromal	Stromal	LAMB2_Stromal	Stromal	0.353122
COL6A3_Stromal~LAMC1_Stromal	COL6A3_Stromal	Stromal	LAMC1_Stromal	Stromal	0.270812
COL6A3_Stromal~MMP2_Stromal	COL6A3_Stromal	Stromal	MMP2_Stromal	Stromal	0.436719
COL6A3_Stromal~P4HB_Stromal	COL6A3_Stromal	Stromal	P4HB_Stromal	Stromal	0.409012
COL6A3_Stromal~PDGFA_Stromal	COL6A3_Stromal	Stromal	PDGFA_Stromal	Stromal	0.244758
COL8A1_Stromal~COL8A2_Stromal	COL8A1_Stromal	Stromal	COL8A2_Stromal	Stromal	0.123027
COL8A1_Stromal~CRTAP_Stromal	COL8A1_Stromal	Stromal	CRTAP_Stromal	Stromal	0.138923
COL8A1_Stromal~DCN_Stromal	COL8A1_Stromal	Stromal	DCN_Stromal	Stromal	0.407754
COL8A1_Stromal~EFEMP2_Stromal	COL8A1_Stromal	Stromal	EFEMP2_Stromal	Stromal	0.198079
COL8A1_Stromal~FN1_Stromal	COL8A1_Stromal	Stromal	FN1_Stromal	Stromal	0.404158
COL8A1_Stromal~GPC1_Stromal	COL8A1_Stromal	Stromal	GPC1_Stromal	Stromal	0.16278
COL8A1_Stromal~GPC4_Stromal	COL8A1_Stromal	Stromal	GPC4_Stromal	Stromal	0.0974169
COL8A1_Stromal~HSPG2_Stromal	COL8A1_Stromal	Stromal	HSPG2_Stromal	Stromal	0.108722
COL8A1_Stromal~ITGA10_Stromal	COL8A1_Stromal	Stromal	ITGA10_Stromal	Stromal	0.228959
COL8A1_Stromal~ITGA11_Stromal	COL8A1_Stromal	Stromal	ITGA11_Stromal	Stromal	0.179443
COL8A1_Stromal~ITGAE_Stromal	COL8A1_Stromal	Stromal	ITGAE_Stromal	Stromal	0.102808
COL8A1_Stromal~ITGAV_Stromal	COL8A1_Stromal	Stromal	ITGAV_Stromal	Stromal	0.14936
COL8A1_Stromal~ITGB1_Stromal	COL8A1_Stromal	Stromal	ITGB1_Stromal	Stromal	0.253094
COL8A1_Stromal~ITGB2_Stromal	COL8A1_Stromal	Stromal	ITGB2_Stromal	Stromal	0.101839
COL8A1_Stromal~ITGB5_Stromal	COL8A1_Stromal	Stromal	ITGB5_Stromal	Stromal	0.216456
COL8A1_Stromal~ITGBL1_Stromal	COL8A1_Stromal	Stromal	ITGBL1_Stromal	Stromal	0.110308
COL8A1_Stromal~LAMA4_Stromal	COL8A1_Stromal	Stromal	LAMA4_Stromal	Stromal	0.185819
COL8A1_Stromal~LAMB1_Stromal	COL8A1_Stromal	Stromal	LAMB1_Stromal	Stromal	0.139114
COL8A1_Stromal~LAMB2_Stromal	COL8A1_Stromal	Stromal	LAMB2_Stromal	Stromal	0.193709
COL8A1_Stromal~LAMC1_Stromal	COL8A1_Stromal	Stromal	LAMC1_Stromal	Stromal	0.111399
COL8A1_Stromal~LUM_Stromal	COL8A1_Stromal	Stromal	LUM_Stromal	Stromal	0.402072
COL8A1_Stromal~P4HB_Stromal	COL8A1_Stromal	Stromal	P4HB_Stromal	Stromal	0.249599
COL8A1_Stromal~SDC4_Stromal	COL8A1_Stromal	Stromal	SDC4_Stromal	Stromal	0.0787448
COL8A1_Stromal~SMC3_Stromal	COL8A1_Stromal	Stromal	SMC3_Stromal	Stromal	0.13382
COL8A1_Stromal~TNC_Stromal	COL8A1_Stromal	Stromal	TNC_Stromal	Stromal	0.280776
COL8A1_Stromal~VCAN_Stromal	COL8A1_Stromal	Stromal	VCAN_Stromal	Stromal	0.204944
COL8A2_Stromal~COLEC12_Stromal	COL8A2_Stromal	Stromal	COLEC12_Stromal	Stromal	0.162455
COL8A2_Stromal~CRTAP_Stromal	COL8A2_Stromal	Stromal	CRTAP_Stromal	Stromal	0.131646
COL8A2_Stromal~DCN_Stromal	COL8A2_Stromal	Stromal	DCN_Stromal	Stromal	0.400477
COL8A2_Stromal~FN1_Stromal	COL8A2_Stromal	Stromal	FN1_Stromal	Stromal	0.396881
COL8A2_Stromal~GPC1_Stromal	COL8A2_Stromal	Stromal	GPC1_Stromal	Stromal	0.155504
COL8A2_Stromal~GPC4_Stromal	COL8A2_Stromal	Stromal	GPC4_Stromal	Stromal	0.0901407
COL8A2_Stromal~HSPG2_Stromal	COL8A2_Stromal	Stromal	HSPG2_Stromal	Stromal	0.101446
COL8A2_Stromal~ITGA10_Stromal	COL8A2_Stromal	Stromal	ITGA10_Stromal	Stromal	0.221683
COL8A2_Stromal~ITGA11_Stromal	COL8A2_Stromal	Stromal	ITGA11_Stromal	Stromal	0.172167
COL8A2_Stromal~ITGAE_Stromal	COL8A2_Stromal	Stromal	ITGAE_Stromal	Stromal	0.0955314
COL8A2_Stromal~ITGAV_Stromal	COL8A2_Stromal	Stromal	ITGAV_Stromal	Stromal	0.142084
COL8A2_Stromal~ITGB1_Stromal	COL8A2_Stromal	Stromal	ITGB1_Stromal	Stromal	0.245818
COL8A2_Stromal~ITGB2_Stromal	COL8A2_Stromal	Stromal	ITGB2_Stromal	Stromal	0.0945631
COL8A2_Stromal~ITGB5_Stromal	COL8A2_Stromal	Stromal	ITGB5_Stromal	Stromal	0.209179
COL8A2_Stromal~ITGBL1_Stromal	COL8A2_Stromal	Stromal	ITGBL1_Stromal	Stromal	0.103032
COL8A2_Stromal~LAMA4_Stromal	COL8A2_Stromal	Stromal	LAMA4_Stromal	Stromal	0.178543
COL8A2_Stromal~LAMB1_Stromal	COL8A2_Stromal	Stromal	LAMB1_Stromal	Stromal	0.131837
COL8A2_Stromal~LAMB2_Stromal	COL8A2_Stromal	Stromal	LAMB2_Stromal	Stromal	0.186432
COL8A2_Stromal~LAMC1_Stromal	COL8A2_Stromal	Stromal	LAMC1_Stromal	Stromal	0.104123
COL8A2_Stromal~LUM_Stromal	COL8A2_Stromal	Stromal	LUM_Stromal	Stromal	0.394796
COL8A2_Stromal~P4HB_Stromal	COL8A2_Stromal	Stromal	P4HB_Stromal	Stromal	0.242323
COL8A2_Stromal~SDC4_Stromal	COL8A2_Stromal	Stromal	SDC4_Stromal	Stromal	0.0714685
COL8A2_Stromal~SMC3_Stromal	COL8A2_Stromal	Stromal	SMC3_Stromal	Stromal	0.126543
COL8A2_Stromal~TNC_Stromal	COL8A2_Stromal	Stromal	TNC_Stromal	Stromal	0.2735
COL8A2_Stromal~VCAN_Stromal	COL8A2_Stromal	Stromal	VCAN_Stromal	Stromal	0.197668
COLEC12_Stromal~LGALS3_Stromal	COLEC12_Stromal	Stromal	LGALS3_Stromal	Stromal	0.295731
COLEC12_Stromal~LPAR1_Stromal	COLEC12_Stromal	Stromal	LPAR1_Stromal	Stromal	0.131957
CRELD2_Stromal~NR1H2_Stromal	CRELD2_Stromal	Stromal	NR1H2_Stromal	Stromal	0.0981295
CRELD2_Stromal~SRGN_Stromal	CRELD2_Stromal	Stromal	SRGN_Stromal	Stromal	0.126961
CRELD2_Stromal~WISP3_Stromal	CRELD2_Stromal	Stromal	WISP3_Stromal	Stromal	0.120111
CRIP2_Stromal~NOTCH3_Stromal	CRIP2_Stromal	Stromal	NOTCH3_Stromal	Stromal	0.26393
CRIP2_Stromal~PPT1_Stromal	CRIP2_Stromal	Stromal	PPT1_Stromal	Stromal	0.178863
CRTAP_Stromal~CTSD_Stromal	CRTAP_Stromal	Stromal	CTSD_Stromal	Stromal	0.224603
CRTAP_Stromal~DPP7_Stromal	CRTAP_Stromal	Stromal	DPP7_Stromal	Stromal	0.18418
CRTAP_Stromal~FBN1_Stromal	CRTAP_Stromal	Stromal	FBN1_Stromal	Stromal	0.227412
CRTAP_Stromal~FSTL1_Stromal	CRTAP_Stromal	Stromal	FSTL1_Stromal	Stromal	0.224847
CRTAP_Stromal~ITGAV_Stromal	CRTAP_Stromal	Stromal	ITGAV_Stromal	Stromal	0.15798
CRTAP_Stromal~ITGB1_Stromal	CRTAP_Stromal	Stromal	ITGB1_Stromal	Stromal	0.261714
CRTAP_Stromal~LAMC1_Stromal	CRTAP_Stromal	Stromal	LAMC1_Stromal	Stromal	0.120019
CRTAP_Stromal~LEPRE1_Stromal	CRTAP_Stromal	Stromal	LEPRE1_Stromal	Stromal	0.153522
CRTAP_Stromal~LGALS3BP_Stromal	CRTAP_Stromal	Stromal	LGALS3BP_Stromal	Stromal	0.246614
CRTAP_Stromal~M6PR_Stromal	CRTAP_Stromal	Stromal	M6PR_Stromal	Stromal	0.077036
CRTAP_Stromal~P4HB_Stromal	CRTAP_Stromal	Stromal	P4HB_Stromal	Stromal	0.258218
CRTAP_Stromal~PLXNB2_Stromal	CRTAP_Stromal	Stromal	PLXNB2_Stromal	Stromal	0.15742
CRTAP_Stromal~PPT1_Stromal	CRTAP_Stromal	Stromal	PPT1_Stromal	Stromal	0.1159
CRTAP_Stromal~PSAP_Stromal	CRTAP_Stromal	Stromal	PSAP_Stromal	Stromal	0.289928
CSF1_Stromal~HLA-B_Stromal	CSF1_Stromal	Stromal	HLA-B_Stromal	Stromal	0.379901
CSF1_Stromal~ITGAV_Stromal	CSF1_Stromal	Stromal	ITGAV_Stromal	Stromal	0.211734
CST3_Stromal~CTSB_Stromal	CST3_Stromal	Stromal	CTSB_Stromal	Stromal	0.499794
CST3_Stromal~CTSD_Stromal	CST3_Stromal	Stromal	CTSD_Stromal	Stromal	0.432769
CST3_Stromal~FN1_Stromal	CST3_Stromal	Stromal	FN1_Stromal	Stromal	0.620943
CST3_Stromal~GSN_Stromal	CST3_Stromal	Stromal	GSN_Stromal	Stromal	0.4524
CST3_Stromal~ITGB5_Stromal	CST3_Stromal	Stromal	ITGB5_Stromal	Stromal	0.433241
CST3_Stromal~SERPING1_Stromal	CST3_Stromal	Stromal	SERPING1_Stromal	Stromal	0.507388
CST3_Stromal~SLC1A5_Stromal	CST3_Stromal	Stromal	SLC1A5_Stromal	Stromal	0.292655
CTGF_Stromal~FBLN1_Stromal	CTGF_Stromal	Stromal	FBLN1_Stromal	Stromal	0.39615
CTGF_Stromal~FGFR2_Stromal	CTGF_Stromal	Stromal	FGFR2_Stromal	Stromal	0.299373
CTGF_Stromal~FN1_Stromal	CTGF_Stromal	Stromal	FN1_Stromal	Stromal	0.580156
CTGF_Stromal~HSPG2_Stromal	CTGF_Stromal	Stromal	HSPG2_Stromal	Stromal	0.28472
CTGF_Stromal~ITGB2_Stromal	CTGF_Stromal	Stromal	ITGB2_Stromal	Stromal	0.277838
CTGF_Stromal~LRP1_Stromal	CTGF_Stromal	Stromal	LRP1_Stromal	Stromal	0.403751
CTGF_Stromal~NR3C1_Stromal	CTGF_Stromal	Stromal	NR3C1_Stromal	Stromal	0.318436
CTGF_Stromal~TGFB1_Stromal	CTGF_Stromal	Stromal	TGFB1_Stromal	Stromal	0.378251
CTGF_Stromal~TGFB2_Stromal	CTGF_Stromal	Stromal	TGFB2_Stromal	Stromal	0.32395
CTGF_Stromal~TGFB3_Stromal	CTGF_Stromal	Stromal	TGFB3_Stromal	Stromal	0.298364
CTGF_Stromal~TGFBR2_Stromal	CTGF_Stromal	Stromal	TGFBR2_Stromal	Stromal	0.341528
CTHRC1_Stromal~FZD5_Stromal	CTHRC1_Stromal	Stromal	FZD5_Stromal	Stromal	0.192047
CTHRC1_Stromal~ROR2_Stromal	CTHRC1_Stromal	Stromal	ROR2_Stromal	Stromal	0.215416
CTSB_Stromal~CTSD_Stromal	CTSB_Stromal	Stromal	CTSD_Stromal	Stromal	0.368688
CTSB_Stromal~HLA-DPA1_Stromal	CTSB_Stromal	Stromal	HLA-DPA1_Stromal	Stromal	0.309033
CTSB_Stromal~HLA-DQB1_Stromal	CTSB_Stromal	Stromal	HLA-DQB1_Stromal	Stromal	0.272462
CTSB_Stromal~HLA-DRA_Stromal	CTSB_Stromal	Stromal	HLA-DRA_Stromal	Stromal	0.386716
CTSB_Stromal~HLA-DRB1_Stromal	CTSB_Stromal	Stromal	HLA-DRB1_Stromal	Stromal	0.421976
CTSB_Stromal~S100A8_Stromal	CTSB_Stromal	Stromal	S100A8_Stromal	Stromal	0.244271
CTSB_Stromal~SERPINF1_Stromal	CTSB_Stromal	Stromal	SERPINF1_Stromal	Stromal	0.51803
CTSB_Stromal~SLPI_Stromal	CTSB_Stromal	Stromal	SLPI_Stromal	Stromal	0.385856
CTSB_Stromal~SRPX2_Stromal	CTSB_Stromal	Stromal	SRPX2_Stromal	Stromal	0.24103
CTSD_Stromal~DPP7_Stromal	CTSD_Stromal	Stromal	DPP7_Stromal	Stromal	0.261241
CTSD_Stromal~FBN1_Stromal	CTSD_Stromal	Stromal	FBN1_Stromal	Stromal	0.304473
CTSD_Stromal~FN1_Stromal	CTSD_Stromal	Stromal	FN1_Stromal	Stromal	0.489838
CTSD_Stromal~HLA-DPA1_Stromal	CTSD_Stromal	Stromal	HLA-DPA1_Stromal	Stromal	0.242009
CTSD_Stromal~HLA-DQB1_Stromal	CTSD_Stromal	Stromal	HLA-DQB1_Stromal	Stromal	0.205437
CTSD_Stromal~HLA-DRA_Stromal	CTSD_Stromal	Stromal	HLA-DRA_Stromal	Stromal	0.319692
CTSD_Stromal~HLA-DRB1_Stromal	CTSD_Stromal	Stromal	HLA-DRB1_Stromal	Stromal	0.354952
CTSD_Stromal~HMGB1_Stromal	CTSD_Stromal	Stromal	HMGB1_Stromal	Stromal	0.388312
CTSD_Stromal~HMGB2_Stromal	CTSD_Stromal	Stromal	HMGB2_Stromal	Stromal	0.15738
CTSD_Stromal~HSP90AA1_Stromal	CTSD_Stromal	Stromal	HSP90AA1_Stromal	Stromal	0.381236
CTSD_Stromal~HSP90B1_Stromal	CTSD_Stromal	Stromal	HSP90B1_Stromal	Stromal	0.334868
CTSD_Stromal~IGFBP4_Stromal	CTSD_Stromal	Stromal	IGFBP4_Stromal	Stromal	0.177776
CTSD_Stromal~ITGAV_Stromal	CTSD_Stromal	Stromal	ITGAV_Stromal	Stromal	0.235041
CTSD_Stromal~ITGB1_Stromal	CTSD_Stromal	Stromal	ITGB1_Stromal	Stromal	0.338775
CTSD_Stromal~ITGB2_Stromal	CTSD_Stromal	Stromal	ITGB2_Stromal	Stromal	0.18752
CTSD_Stromal~LAMC1_Stromal	CTSD_Stromal	Stromal	LAMC1_Stromal	Stromal	0.19708
CTSD_Stromal~LEPRE1_Stromal	CTSD_Stromal	Stromal	LEPRE1_Stromal	Stromal	0.230583
CTSD_Stromal~LGALS3BP_Stromal	CTSD_Stromal	Stromal	LGALS3BP_Stromal	Stromal	0.323675
CTSD_Stromal~M6PR_Stromal	CTSD_Stromal	Stromal	M6PR_Stromal	Stromal	0.154097
CTSD_Stromal~MIF_Stromal	CTSD_Stromal	Stromal	MIF_Stromal	Stromal	0.305837
CTSD_Stromal~P4HB_Stromal	CTSD_Stromal	Stromal	P4HB_Stromal	Stromal	0.33528
CTSD_Stromal~PKM_Stromal	CTSD_Stromal	Stromal	PKM_Stromal	Stromal	0.394141
CTSD_Stromal~PLXNB2_Stromal	CTSD_Stromal	Stromal	PLXNB2_Stromal	Stromal	0.234481
CTSD_Stromal~PPT1_Stromal	CTSD_Stromal	Stromal	PPT1_Stromal	Stromal	0.192961
CTSD_Stromal~PSAP_Stromal	CTSD_Stromal	Stromal	PSAP_Stromal	Stromal	0.366989
CTSD_Stromal~S100A4_Stromal	CTSD_Stromal	Stromal	S100A4_Stromal	Stromal	0.466033
CTSD_Stromal~S100A8_Stromal	CTSD_Stromal	Stromal	S100A8_Stromal	Stromal	0.177247
CTSD_Stromal~VCAM1_Stromal	CTSD_Stromal	Stromal	VCAM1_Stromal	Stromal	0.26402
CTSF_Stromal~HLA-DPA1_Stromal	CTSF_Stromal	Stromal	HLA-DPA1_Stromal	Stromal	0.169848
CTSF_Stromal~HLA-DQB1_Stromal	CTSF_Stromal	Stromal	HLA-DQB1_Stromal	Stromal	0.133276
CTSF_Stromal~HLA-DRA_Stromal	CTSF_Stromal	Stromal	HLA-DRA_Stromal	Stromal	0.24753
CTSF_Stromal~HLA-DRB1_Stromal	CTSF_Stromal	Stromal	HLA-DRB1_Stromal	Stromal	0.282791
CTSF_Stromal~ISLR_Stromal	CTSF_Stromal	Stromal	ISLR_Stromal	Stromal	0.230041
CXCL14_Stromal~NR3C1_Stromal	CXCL14_Stromal	Stromal	NR3C1_Stromal	Stromal	0.257746
CYR61_Stromal~ITGAV_Stromal	CYR61_Stromal	Stromal	ITGAV_Stromal	Stromal	0.255183
CYR61_Stromal~ITGB1_Stromal	CYR61_Stromal	Stromal	ITGB1_Stromal	Stromal	0.358916
CYR61_Stromal~ITGB2_Stromal	CYR61_Stromal	Stromal	ITGB2_Stromal	Stromal	0.207661
CYR61_Stromal~ITGB5_Stromal	CYR61_Stromal	Stromal	ITGB5_Stromal	Stromal	0.322278
CYR61_Stromal~PPT1_Stromal	CYR61_Stromal	Stromal	PPT1_Stromal	Stromal	0.213103
CYR61_Stromal~SLIT2_Stromal	CYR61_Stromal	Stromal	SLIT2_Stromal	Stromal	0.231399
DCN_Stromal~DPT_Stromal	DCN_Stromal	Stromal	DPT_Stromal	Stromal	0.416745
DCN_Stromal~FBN1_Stromal	DCN_Stromal	Stromal	FBN1_Stromal	Stromal	0.496243
DCN_Stromal~FN1_Stromal	DCN_Stromal	Stromal	FN1_Stromal	Stromal	0.681608
DCN_Stromal~MMP14_Stromal	DCN_Stromal	Stromal	MMP14_Stromal	Stromal	0.511861
DCN_Stromal~MMP2_Stromal	DCN_Stromal	Stromal	MMP2_Stromal	Stromal	0.554756
DCN_Stromal~TGFB1_Stromal	DCN_Stromal	Stromal	TGFB1_Stromal	Stromal	0.479704
DCN_Stromal~TGFB2_Stromal	DCN_Stromal	Stromal	TGFB2_Stromal	Stromal	0.425402
DCN_Stromal~THBS1_Stromal	DCN_Stromal	Stromal	THBS1_Stromal	Stromal	0.363883
DCN_Stromal~WISP1_Stromal	DCN_Stromal	Stromal	WISP1_Stromal	Stromal	0.377635
DDR2_Stromal~HSP90AA1_Stromal	DDR2_Stromal	Stromal	HSP90AA1_Stromal	Stromal	0.300969
DLG1_Stromal~FZD7_Stromal	DLG1_Stromal	Stromal	FZD7_Stromal	Stromal	0.0715245
DPP7_Stromal~FBN1_Stromal	DPP7_Stromal	Stromal	FBN1_Stromal	Stromal	0.26405
DPP7_Stromal~ITGAV_Stromal	DPP7_Stromal	Stromal	ITGAV_Stromal	Stromal	0.194617
DPP7_Stromal~ITGB1_Stromal	DPP7_Stromal	Stromal	ITGB1_Stromal	Stromal	0.298351
DPP7_Stromal~LAMC1_Stromal	DPP7_Stromal	Stromal	LAMC1_Stromal	Stromal	0.156656
DPP7_Stromal~LEPRE1_Stromal	DPP7_Stromal	Stromal	LEPRE1_Stromal	Stromal	0.190159
DPP7_Stromal~LGALS3BP_Stromal	DPP7_Stromal	Stromal	LGALS3BP_Stromal	Stromal	0.283251
DPP7_Stromal~M6PR_Stromal	DPP7_Stromal	Stromal	M6PR_Stromal	Stromal	0.113673
DPP7_Stromal~PLXNB2_Stromal	DPP7_Stromal	Stromal	PLXNB2_Stromal	Stromal	0.194057
DPP7_Stromal~PPT1_Stromal	DPP7_Stromal	Stromal	PPT1_Stromal	Stromal	0.152537
DPP7_Stromal~PSAP_Stromal	DPP7_Stromal	Stromal	PSAP_Stromal	Stromal	0.326565
DPT_Stromal~LOX_Stromal	DPT_Stromal	Stromal	LOX_Stromal	Stromal	0.085155
DPT_Stromal~TGFB1_Stromal	DPT_Stromal	Stromal	TGFB1_Stromal	Stromal	0.211245
DST_Stromal~ERBB2IP_Stromal	DST_Stromal	Stromal	ERBB2IP_Stromal	Stromal	0.149515
DST_Stromal~GSN_Stromal	DST_Stromal	Stromal	GSN_Stromal	Stromal	0.301539
DST_Stromal~HTRA1_Stromal	DST_Stromal	Stromal	HTRA1_Stromal	Stromal	0.34924
DST_Stromal~NR3C1_Stromal	DST_Stromal	Stromal	NR3C1_Stromal	Stromal	0.208363
DST_Stromal~PKM_Stromal	DST_Stromal	Stromal	PKM_Stromal	Stromal	0.374385
EBP_Stromal~HSP90B1_Stromal	EBP_Stromal	Stromal	HSP90B1_Stromal	Stromal	0.189395
ECM1_Stromal~FBLN1_Stromal	ECM1_Stromal	Stromal	FBLN1_Stromal	Stromal	0.157758
ECM1_Stromal~FN1_Stromal	ECM1_Stromal	Stromal	FN1_Stromal	Stromal	0.341764
ECM1_Stromal~GRN_Stromal	ECM1_Stromal	Stromal	GRN_Stromal	Stromal	0.155276
ECM1_Stromal~HSPG2_Stromal	ECM1_Stromal	Stromal	HSPG2_Stromal	Stromal	0.0463283
ECM1_Stromal~THBS1_Stromal	ECM1_Stromal	Stromal	THBS1_Stromal	Stromal	0.0240389
EDIL3_Stromal~ITGAV_Stromal	EDIL3_Stromal	Stromal	ITGAV_Stromal	Stromal	0.17215
EDIL3_Stromal~ITGB5_Stromal	EDIL3_Stromal	Stromal	ITGB5_Stromal	Stromal	0.239245
EFEMP2_Stromal~FBN1_Stromal	EFEMP2_Stromal	Stromal	FBN1_Stromal	Stromal	0.286569
EFEMP2_Stromal~LOX_Stromal	EFEMP2_Stromal	Stromal	LOX_Stromal	Stromal	0.143939
EFEMP2_Stromal~PLSCR1_Stromal	EFEMP2_Stromal	Stromal	PLSCR1_Stromal	Stromal	0.136876
EFNB1_Stromal~EPHA2_Stromal	EFNB1_Stromal	Stromal	EPHA2_Stromal	Stromal	0.0883917
EFNB1_Stromal~HLA-DPA1_Stromal	EFNB1_Stromal	Stromal	HLA-DPA1_Stromal	Stromal	0.140383
EFNB1_Stromal~MMP2_Stromal	EFNB1_Stromal	Stromal	MMP2_Stromal	Stromal	0.26136
EFNB1_Stromal~MMP9_Stromal	EFNB1_Stromal	Stromal	MMP9_Stromal	Stromal	0.209681
EMILIN1_Stromal~ITGB1_Stromal	EMILIN1_Stromal	Stromal	ITGB1_Stromal	Stromal	0.351403
EMILIN1_Stromal~NR3C1_Stromal	EMILIN1_Stromal	Stromal	NR3C1_Stromal	Stromal	0.240748
EMILIN1_Stromal~TGFB1_Stromal	EMILIN1_Stromal	Stromal	TGFB1_Stromal	Stromal	0.300562
ENG_Stromal~INHBA_Stromal	ENG_Stromal	Stromal	INHBA_Stromal	Stromal	0.115451
ENG_Stromal~ITGB1_Stromal	ENG_Stromal	Stromal	ITGB1_Stromal	Stromal	0.234287
ENG_Stromal~MMP14_Stromal	ENG_Stromal	Stromal	MMP14_Stromal	Stromal	0.215603
ENG_Stromal~TGFB1_Stromal	ENG_Stromal	Stromal	TGFB1_Stromal	Stromal	0.183446
ENG_Stromal~TGFB2_Stromal	ENG_Stromal	Stromal	TGFB2_Stromal	Stromal	0.129144
ENG_Stromal~TGFB3_Stromal	ENG_Stromal	Stromal	TGFB3_Stromal	Stromal	0.103558
ENG_Stromal~TGFBR1_Stromal	ENG_Stromal	Stromal	TGFBR1_Stromal	Stromal	0.0934352
ENG_Stromal~TGFBR2_Stromal	ENG_Stromal	Stromal	TGFBR2_Stromal	Stromal	0.146722
ENPP1_Stromal~GLG1_Stromal	ENPP1_Stromal	Stromal	GLG1_Stromal	Stromal	0.221481
ENPP1_Stromal~GPC4_Stromal	ENPP1_Stromal	Stromal	GPC4_Stromal	Stromal	0.170585
ENPP2_Stromal~LPAR1_Stromal	ENPP2_Stromal	Stromal	LPAR1_Stromal	Stromal	0.187424
ENPP2_Stromal~NR3C1_Stromal	ENPP2_Stromal	Stromal	NR3C1_Stromal	Stromal	0.237333
EPHA2_Stromal~GSN_Stromal	EPHA2_Stromal	Stromal	GSN_Stromal	Stromal	0.209648
EPHA2_Stromal~HSP90AA1_Stromal	EPHA2_Stromal	Stromal	HSP90AA1_Stromal	Stromal	0.269589
EPHA2_Stromal~ITGAV_Stromal	EPHA2_Stromal	Stromal	ITGAV_Stromal	Stromal	0.123395
EPHA2_Stromal~ITGB1_Stromal	EPHA2_Stromal	Stromal	ITGB1_Stromal	Stromal	0.227128
EPHA2_Stromal~ITGB5_Stromal	EPHA2_Stromal	Stromal	ITGB5_Stromal	Stromal	0.19049
EPHA2_Stromal~NR3C1_Stromal	EPHA2_Stromal	Stromal	NR3C1_Stromal	Stromal	0.116472
EPHA2_Stromal~PKM_Stromal	EPHA2_Stromal	Stromal	PKM_Stromal	Stromal	0.282495
EPHA2_Stromal~TGFBR1_Stromal	EPHA2_Stromal	Stromal	TGFBR1_Stromal	Stromal	0.0862768
ERBB2IP_Stromal~FN1_Stromal	ERBB2IP_Stromal	Stromal	FN1_Stromal	Stromal	0.357445
ERBB2IP_Stromal~HSP90AA1_Stromal	ERBB2IP_Stromal	Stromal	HSP90AA1_Stromal	Stromal	0.248843
ERBB2IP_Stromal~IL4R_Stromal	ERBB2IP_Stromal	Stromal	IL4R_Stromal	Stromal	0.0244688
ERBB2IP_Stromal~LAMB1_Stromal	ERBB2IP_Stromal	Stromal	LAMB1_Stromal	Stromal	0.0924012
ERBB2IP_Stromal~LEPRE1_Stromal	ERBB2IP_Stromal	Stromal	LEPRE1_Stromal	Stromal	0.0981897
ERBB2IP_Stromal~LGALS1_Stromal	ERBB2IP_Stromal	Stromal	LGALS1_Stromal	Stromal	0.384395
ERBB2IP_Stromal~MFGE8_Stromal	ERBB2IP_Stromal	Stromal	MFGE8_Stromal	Stromal	0.168337
ERBB2IP_Stromal~RUNX1_Stromal	ERBB2IP_Stromal	Stromal	RUNX1_Stromal	Stromal	0.0334946
EVI2A_Stromal~FGFR1_Stromal	EVI2A_Stromal	Stromal	FGFR1_Stromal	Stromal	0.288692
EXTL2_Stromal~LPAR1_Stromal	EXTL2_Stromal	Stromal	LPAR1_Stromal	Stromal	0.0723692
FAM3C_Stromal~HLA-C_Stromal	FAM3C_Stromal	Stromal	HLA-C_Stromal	Stromal	0.323814
FAP_Stromal~NPTN_Stromal	FAP_Stromal	Stromal	NPTN_Stromal	Stromal	0.105019
FAP_Stromal~PLAUR_Stromal	FAP_Stromal	Stromal	PLAUR_Stromal	Stromal	0.21955
FAP_Stromal~THY1_Stromal	FAP_Stromal	Stromal	THY1_Stromal	Stromal	0.278937
FAS_Stromal~FGF7_Stromal	FAS_Stromal	Stromal	FGF7_Stromal	Stromal	0.13834
FAS_Stromal~HLA-B_Stromal	FAS_Stromal	Stromal	HLA-B_Stromal	Stromal	0.284971
FAS_Stromal~TNFRSF1A_Stromal	FAS_Stromal	Stromal	TNFRSF1A_Stromal	Stromal	0.140634
FAS_Stromal~TNFSF12_Stromal	FAS_Stromal	Stromal	TNFSF12_Stromal	Stromal	0.041387
FBLN1_Stromal~FN1_Stromal	FBLN1_Stromal	Stromal	FN1_Stromal	Stromal	0.494006
FBLN1_Stromal~HSPG2_Stromal	FBLN1_Stromal	Stromal	HSPG2_Stromal	Stromal	0.198571
FBLN1_Stromal~ITGB1_Stromal	FBLN1_Stromal	Stromal	ITGB1_Stromal	Stromal	0.342943
FBLN1_Stromal~LTBP4_Stromal	FBLN1_Stromal	Stromal	LTBP4_Stromal	Stromal	0.183301
FBLN1_Stromal~MFAP1_Stromal	FBLN1_Stromal	Stromal	MFAP1_Stromal	Stromal	0.157494
FBLN1_Stromal~MFAP2_Stromal	FBLN1_Stromal	Stromal	MFAP2_Stromal	Stromal	0.176996
FBLN1_Stromal~NID1_Stromal	FBLN1_Stromal	Stromal	NID1_Stromal	Stromal	0.187944
FBLN1_Stromal~NOTCH3_Stromal	FBLN1_Stromal	Stromal	NOTCH3_Stromal	Stromal	0.282197
FBLN1_Stromal~PLSCR1_Stromal	FBLN1_Stromal	Stromal	PLSCR1_Stromal	Stromal	0.158949
FBLN1_Stromal~SFRP4_Stromal	FBLN1_Stromal	Stromal	SFRP4_Stromal	Stromal	0.410148
FBLN1_Stromal~VCAN_Stromal	FBLN1_Stromal	Stromal	VCAN_Stromal	Stromal	0.294793
FBN1_Stromal~FN1_Stromal	FBN1_Stromal	Stromal	FN1_Stromal	Stromal	0.492647
FBN1_Stromal~GRN_Stromal	FBN1_Stromal	Stromal	GRN_Stromal	Stromal	0.306159
FBN1_Stromal~HSPG2_Stromal	FBN1_Stromal	Stromal	HSPG2_Stromal	Stromal	0.197212
FBN1_Stromal~IGFBP7_Stromal	FBN1_Stromal	Stromal	IGFBP7_Stromal	Stromal	0.343403
FBN1_Stromal~ITGAV_Stromal	FBN1_Stromal	Stromal	ITGAV_Stromal	Stromal	0.23785
FBN1_Stromal~ITGB1_Stromal	FBN1_Stromal	Stromal	ITGB1_Stromal	Stromal	0.341584
FBN1_Stromal~LAMC1_Stromal	FBN1_Stromal	Stromal	LAMC1_Stromal	Stromal	0.199889
FBN1_Stromal~LEPRE1_Stromal	FBN1_Stromal	Stromal	LEPRE1_Stromal	Stromal	0.233392
FBN1_Stromal~LGALS3BP_Stromal	FBN1_Stromal	Stromal	LGALS3BP_Stromal	Stromal	0.326484
FBN1_Stromal~LOX_Stromal	FBN1_Stromal	Stromal	LOX_Stromal	Stromal	0.164653
FBN1_Stromal~LOXL1_Stromal	FBN1_Stromal	Stromal	LOXL1_Stromal	Stromal	0.252121
FBN1_Stromal~LTBP1_Stromal	FBN1_Stromal	Stromal	LTBP1_Stromal	Stromal	0.229445
FBN1_Stromal~LTBP4_Stromal	FBN1_Stromal	Stromal	LTBP4_Stromal	Stromal	0.181942
FBN1_Stromal~M6PR_Stromal	FBN1_Stromal	Stromal	M6PR_Stromal	Stromal	0.156906
FBN1_Stromal~MFAP2_Stromal	FBN1_Stromal	Stromal	MFAP2_Stromal	Stromal	0.175637
FBN1_Stromal~PLXNB2_Stromal	FBN1_Stromal	Stromal	PLXNB2_Stromal	Stromal	0.23729
FBN1_Stromal~PPT1_Stromal	FBN1_Stromal	Stromal	PPT1_Stromal	Stromal	0.19577
FBN1_Stromal~PSAP_Stromal	FBN1_Stromal	Stromal	PSAP_Stromal	Stromal	0.369798
FBN1_Stromal~SERPINE1_Stromal	FBN1_Stromal	Stromal	SERPINE1_Stromal	Stromal	0.250192
FBN1_Stromal~TGFB2_Stromal	FBN1_Stromal	Stromal	TGFB2_Stromal	Stromal	0.236441
FBN1_Stromal~TGFBI_Stromal	FBN1_Stromal	Stromal	TGFBI_Stromal	Stromal	0.338182
FBN1_Stromal~THBS1_Stromal	FBN1_Stromal	Stromal	THBS1_Stromal	Stromal	0.174922
FBN1_Stromal~VCAN_Stromal	FBN1_Stromal	Stromal	VCAN_Stromal	Stromal	0.293434
FCGRT_Stromal~HLA-B_Stromal	FCGRT_Stromal	Stromal	HLA-B_Stromal	Stromal	0.420719
FCGRT_Stromal~HLA-E_Stromal	FCGRT_Stromal	Stromal	HLA-E_Stromal	Stromal	0.2803
FGF7_Stromal~FGFR1_Stromal	FGF7_Stromal	Stromal	FGFR1_Stromal	Stromal	0.339502
FGF7_Stromal~FGFR2_Stromal	FGF7_Stromal	Stromal	FGFR2_Stromal	Stromal	0.163967
FGF7_Stromal~HSP90AA1_Stromal	FGF7_Stromal	Stromal	HSP90AA1_Stromal	Stromal	0.336148
FGF7_Stromal~HSPG2_Stromal	FGF7_Stromal	Stromal	HSPG2_Stromal	Stromal	0.149315
FGF7_Stromal~KLRC2_Stromal	FGF7_Stromal	Stromal	KLRC2_Stromal	Stromal	0.195084
FGF7_Stromal~KLRD1_Stromal	FGF7_Stromal	Stromal	KLRD1_Stromal	Stromal	0.119006
FGF7_Stromal~NRP1_Stromal	FGF7_Stromal	Stromal	NRP1_Stromal	Stromal	0.134798
FGF7_Stromal~TYROBP_Stromal	FGF7_Stromal	Stromal	TYROBP_Stromal	Stromal	0.138639
FGF9_Stromal~FGFR1_Stromal	FGF9_Stromal	Stromal	FGFR1_Stromal	Stromal	0.237991
FGF9_Stromal~FGFR2_Stromal	FGF9_Stromal	Stromal	FGFR2_Stromal	Stromal	0.0624569
FGF9_Stromal~HSP90AA1_Stromal	FGF9_Stromal	Stromal	HSP90AA1_Stromal	Stromal	0.234638
FGF9_Stromal~KLRC2_Stromal	FGF9_Stromal	Stromal	KLRC2_Stromal	Stromal	0.0935741
FGF9_Stromal~KLRD1_Stromal	FGF9_Stromal	Stromal	KLRD1_Stromal	Stromal	0.0174957
FGF9_Stromal~NR3C1_Stromal	FGF9_Stromal	Stromal	NR3C1_Stromal	Stromal	0.0815205
FGF9_Stromal~TYROBP_Stromal	FGF9_Stromal	Stromal	TYROBP_Stromal	Stromal	0.0371282
FGFR1_Stromal~FN1_Stromal	FGFR1_Stromal	Stromal	FN1_Stromal	Stromal	0.572764
FGFR1_Stromal~HSP90AA1_Stromal	FGFR1_Stromal	Stromal	HSP90AA1_Stromal	Stromal	0.464161
FGFR1_Stromal~KLRC2_Stromal	FGFR1_Stromal	Stromal	KLRC2_Stromal	Stromal	0.323098
FGFR1_Stromal~KLRD1_Stromal	FGFR1_Stromal	Stromal	KLRD1_Stromal	Stromal	0.247019
FGFR1_Stromal~LTBP4_Stromal	FGFR1_Stromal	Stromal	LTBP4_Stromal	Stromal	0.262058
FGFR1_Stromal~MMP2_Stromal	FGFR1_Stromal	Stromal	MMP2_Stromal	Stromal	0.445912
FGFR1_Stromal~NRP1_Stromal	FGFR1_Stromal	Stromal	NRP1_Stromal	Stromal	0.262811
FGFR1_Stromal~PKM_Stromal	FGFR1_Stromal	Stromal	PKM_Stromal	Stromal	0.477067
FGFR1_Stromal~TGFBR2_Stromal	FGFR1_Stromal	Stromal	TGFBR2_Stromal	Stromal	0.334136
FGFR1_Stromal~TYROBP_Stromal	FGFR1_Stromal	Stromal	TYROBP_Stromal	Stromal	0.266652
FGFR2_Stromal~HSP90AA1_Stromal	FGFR2_Stromal	Stromal	HSP90AA1_Stromal	Stromal	0.288627
FGFR2_Stromal~KLRC2_Stromal	FGFR2_Stromal	Stromal	KLRC2_Stromal	Stromal	0.147563
FGFR2_Stromal~KLRD1_Stromal	FGFR2_Stromal	Stromal	KLRD1_Stromal	Stromal	0.0714849
FGFR2_Stromal~MMP14_Stromal	FGFR2_Stromal	Stromal	MMP14_Stromal	Stromal	0.227482
FGFR2_Stromal~TYROBP_Stromal	FGFR2_Stromal	Stromal	TYROBP_Stromal	Stromal	0.0911174
FMOD_Stromal~TGFB1_Stromal	FMOD_Stromal	Stromal	TGFB1_Stromal	Stromal	0.143803
FMOD_Stromal~TGFB2_Stromal	FMOD_Stromal	Stromal	TGFB2_Stromal	Stromal	0.0895018
FMOD_Stromal~TGFB3_Stromal	FMOD_Stromal	Stromal	TGFB3_Stromal	Stromal	0.0639159
FN1_Stromal~FST_Stromal	FN1_Stromal	Stromal	FST_Stromal	Stromal	0.387514
FN1_Stromal~GSN_Stromal	FN1_Stromal	Stromal	GSN_Stromal	Stromal	0.509469
FN1_Stromal~HMGB1_Stromal	FN1_Stromal	Stromal	HMGB1_Stromal	Stromal	0.576486
FN1_Stromal~HMGB2_Stromal	FN1_Stromal	Stromal	HMGB2_Stromal	Stromal	0.345554
FN1_Stromal~HNRNPM_Stromal	FN1_Stromal	Stromal	HNRNPM_Stromal	Stromal	0.446141
FN1_Stromal~HSP90AA1_Stromal	FN1_Stromal	Stromal	HSP90AA1_Stromal	Stromal	0.56941
FN1_Stromal~HSPG2_Stromal	FN1_Stromal	Stromal	HSPG2_Stromal	Stromal	0.382576
FN1_Stromal~ITGAV_Stromal	FN1_Stromal	Stromal	ITGAV_Stromal	Stromal	0.423215
FN1_Stromal~ITGB1_Stromal	FN1_Stromal	Stromal	ITGB1_Stromal	Stromal	0.526949
FN1_Stromal~ITGB5_Stromal	FN1_Stromal	Stromal	ITGB5_Stromal	Stromal	0.49031
FN1_Stromal~LEPRE1_Stromal	FN1_Stromal	Stromal	LEPRE1_Stromal	Stromal	0.418757
FN1_Stromal~LGALS1_Stromal	FN1_Stromal	Stromal	LGALS1_Stromal	Stromal	0.704962
FN1_Stromal~LGALS3_Stromal	FN1_Stromal	Stromal	LGALS3_Stromal	Stromal	0.530157
FN1_Stromal~LGALS3BP_Stromal	FN1_Stromal	Stromal	LGALS3BP_Stromal	Stromal	0.511849
FN1_Stromal~LTBP1_Stromal	FN1_Stromal	Stromal	LTBP1_Stromal	Stromal	0.414809
FN1_Stromal~LTBP4_Stromal	FN1_Stromal	Stromal	LTBP4_Stromal	Stromal	0.367307
FN1_Stromal~MATN2_Stromal	FN1_Stromal	Stromal	MATN2_Stromal	Stromal	0.379696
FN1_Stromal~MFAP2_Stromal	FN1_Stromal	Stromal	MFAP2_Stromal	Stromal	0.361002
FN1_Stromal~MIA_Stromal	FN1_Stromal	Stromal	MIA_Stromal	Stromal	0.441511
FN1_Stromal~MIF_Stromal	FN1_Stromal	Stromal	MIF_Stromal	Stromal	0.494011
FN1_Stromal~MMP2_Stromal	FN1_Stromal	Stromal	MMP2_Stromal	Stromal	0.55116
FN1_Stromal~MMP9_Stromal	FN1_Stromal	Stromal	MMP9_Stromal	Stromal	0.499481
FN1_Stromal~PDGFA_Stromal	FN1_Stromal	Stromal	PDGFA_Stromal	Stromal	0.359199
FN1_Stromal~PKM_Stromal	FN1_Stromal	Stromal	PKM_Stromal	Stromal	0.582315
FN1_Stromal~RPSA_Stromal	FN1_Stromal	Stromal	RPSA_Stromal	Stromal	0.533108
FN1_Stromal~RUNX1_Stromal	FN1_Stromal	Stromal	RUNX1_Stromal	Stromal	0.354062
FN1_Stromal~SERPING1_Stromal	FN1_Stromal	Stromal	SERPING1_Stromal	Stromal	0.564457
FN1_Stromal~SLC1A5_Stromal	FN1_Stromal	Stromal	SLC1A5_Stromal	Stromal	0.349724
FN1_Stromal~SPARC_Stromal	FN1_Stromal	Stromal	SPARC_Stromal	Stromal	0.67941
FN1_Stromal~TGFB2_Stromal	FN1_Stromal	Stromal	TGFB2_Stromal	Stromal	0.421806
FN1_Stromal~TGFBI_Stromal	FN1_Stromal	Stromal	TGFBI_Stromal	Stromal	0.523547
FN1_Stromal~THBS1_Stromal	FN1_Stromal	Stromal	THBS1_Stromal	Stromal	0.360287
FN1_Stromal~TNC_Stromal	FN1_Stromal	Stromal	TNC_Stromal	Stromal	0.554631
FN1_Stromal~TNFAIP6_Stromal	FN1_Stromal	Stromal	TNFAIP6_Stromal	Stromal	0.3767
FST_Stromal~FSTL1_Stromal	FST_Stromal	Stromal	FSTL1_Stromal	Stromal	0.199583
FST_Stromal~INHBA_Stromal	FST_Stromal	Stromal	INHBA_Stromal	Stromal	0.117615
FSTL1_Stromal~GPC1_Stromal	FSTL1_Stromal	Stromal	GPC1_Stromal	Stromal	0.248705
FSTL1_Stromal~INHBA_Stromal	FSTL1_Stromal	Stromal	INHBA_Stromal	Stromal	0.220183
FSTL1_Stromal~TGFB1_Stromal	FSTL1_Stromal	Stromal	TGFB1_Stromal	Stromal	0.288177
FSTL1_Stromal~TGFBR2_Stromal	FSTL1_Stromal	Stromal	TGFBR2_Stromal	Stromal	0.251454
FZD5_Stromal~ROR2_Stromal	FZD5_Stromal	Stromal	ROR2_Stromal	Stromal	0.0777024
GAS1_Stromal~SMC3_Stromal	GAS1_Stromal	Stromal	SMC3_Stromal	Stromal	0.0882999
GLG1_Stromal~GPC4_Stromal	GLG1_Stromal	Stromal	GPC4_Stromal	Stromal	0.115426
GLOD4_Stromal~NR4A1_Stromal	GLOD4_Stromal	Stromal	NR4A1_Stromal	Stromal	0.0427119
GLOD4_Stromal~SOD1_Stromal	GLOD4_Stromal	Stromal	SOD1_Stromal	Stromal	0.177389
GPC1_Stromal~LRP1_Stromal	GPC1_Stromal	Stromal	LRP1_Stromal	Stromal	0.26023
GPC1_Stromal~SLIT2_Stromal	GPC1_Stromal	Stromal	SLIT2_Stromal	Stromal	0.158055
GPC4_Stromal~HNRNPM_Stromal	GPC4_Stromal	Stromal	HNRNPM_Stromal	Stromal	0.139401
GPC4_Stromal~HSP90AA1_Stromal	GPC4_Stromal	Stromal	HSP90AA1_Stromal	Stromal	0.262669
GPC4_Stromal~ITGA11_Stromal	GPC4_Stromal	Stromal	ITGA11_Stromal	Stromal	0.146557
GPC4_Stromal~LOX_Stromal	GPC4_Stromal	Stromal	LOX_Stromal	Stromal	0.0432771
GPC4_Stromal~LRP1_Stromal	GPC4_Stromal	Stromal	LRP1_Stromal	Stromal	0.194866
GPC4_Stromal~NRP1_Stromal	GPC4_Stromal	Stromal	NRP1_Stromal	Stromal	0.0613192
GPC4_Stromal~RPSA_Stromal	GPC4_Stromal	Stromal	RPSA_Stromal	Stromal	0.226368
GPC4_Stromal~S100A8_Stromal	GPC4_Stromal	Stromal	S100A8_Stromal	Stromal	0.0586805
GPC4_Stromal~THBS1_Stromal	GPC4_Stromal	Stromal	THBS1_Stromal	Stromal	0.0535465
GPC4_Stromal~TMED1_Stromal	GPC4_Stromal	Stromal	TMED1_Stromal	Stromal	0.0976211
GPC6_Stromal~LRP1_Stromal	GPC6_Stromal	Stromal	LRP1_Stromal	Stromal	0.208586
GPC6_Stromal~PLTP_Stromal	GPC6_Stromal	Stromal	PLTP_Stromal	Stromal	0.117565
GPI_Stromal~MIF_Stromal	GPI_Stromal	Stromal	MIF_Stromal	Stromal	0.158754
GPI_Stromal~PKM_Stromal	GPI_Stromal	Stromal	PKM_Stromal	Stromal	0.247058
GPRC5C_Stromal~LPAR1_Stromal	GPRC5C_Stromal	Stromal	LPAR1_Stromal	Stromal	0.08945
GPX7_Stromal~LOX_Stromal	GPX7_Stromal	Stromal	LOX_Stromal	Stromal	0.0807918
GPX7_Stromal~LOXL1_Stromal	GPX7_Stromal	Stromal	LOXL1_Stromal	Stromal	0.16826
GPX7_Stromal~LOXL2_Stromal	GPX7_Stromal	Stromal	LOXL2_Stromal	Stromal	0.0729378
GRN_Stromal~HSP90AA1_Stromal	GRN_Stromal	Stromal	HSP90AA1_Stromal	Stromal	0.382922
GRN_Stromal~HSP90B1_Stromal	GRN_Stromal	Stromal	HSP90B1_Stromal	Stromal	0.336554
GRN_Stromal~HSPG2_Stromal	GRN_Stromal	Stromal	HSPG2_Stromal	Stromal	0.196088
GRN_Stromal~PSAP_Stromal	GRN_Stromal	Stromal	PSAP_Stromal	Stromal	0.368675
GRN_Stromal~RYK_Stromal	GRN_Stromal	Stromal	RYK_Stromal	Stromal	0.233566
GRN_Stromal~SLPI_Stromal	GRN_Stromal	Stromal	SLPI_Stromal	Stromal	0.320518
GRN_Stromal~TNFRSF1A_Stromal	GRN_Stromal	Stromal	TNFRSF1A_Stromal	Stromal	0.260556
GSN_Stromal~HNRNPM_Stromal	GSN_Stromal	Stromal	HNRNPM_Stromal	Stromal	0.277598
GSN_Stromal~HTRA1_Stromal	GSN_Stromal	Stromal	HTRA1_Stromal	Stromal	0.388626
GSN_Stromal~ITGAV_Stromal	GSN_Stromal	Stromal	ITGAV_Stromal	Stromal	0.254672
GSN_Stromal~ITGB5_Stromal	GSN_Stromal	Stromal	ITGB5_Stromal	Stromal	0.321767
GSN_Stromal~LAMB1_Stromal	GSN_Stromal	Stromal	LAMB1_Stromal	Stromal	0.244425
GSN_Stromal~PKM_Stromal	GSN_Stromal	Stromal	PKM_Stromal	Stromal	0.413772
GSN_Stromal~SERPING1_Stromal	GSN_Stromal	Stromal	SERPING1_Stromal	Stromal	0.395914
GSN_Stromal~SLC1A5_Stromal	GSN_Stromal	Stromal	SLC1A5_Stromal	Stromal	0.18118
HAPLN1_Stromal~MMP2_Stromal	HAPLN1_Stromal	Stromal	MMP2_Stromal	Stromal	0.267413
HAPLN1_Stromal~MMP9_Stromal	HAPLN1_Stromal	Stromal	MMP9_Stromal	Stromal	0.215734
HAPLN1_Stromal~NR3C1_Stromal	HAPLN1_Stromal	Stromal	NR3C1_Stromal	Stromal	0.132546
HAPLN1_Stromal~VCAN_Stromal	HAPLN1_Stromal	Stromal	VCAN_Stromal	Stromal	0.195052
HDGF_Stromal~SMC3_Stromal	HDGF_Stromal	Stromal	SMC3_Stromal	Stromal	0.137978
HLA-A_Stromal~HLA-B_Stromal	HLA-A_Stromal	Stromal	HLA-B_Stromal	Stromal	0.515557
HLA-A_Stromal~HLA-C_Stromal	HLA-A_Stromal	Stromal	HLA-C_Stromal	Stromal	0.503656
HLA-A_Stromal~HLA-DPA1_Stromal	HLA-A_Stromal	Stromal	HLA-DPA1_Stromal	Stromal	0.354358
HLA-A_Stromal~HLA-E_Stromal	HLA-A_Stromal	Stromal	HLA-E_Stromal	Stromal	0.375138
HLA-A_Stromal~HSP90B1_Stromal	HLA-A_Stromal	Stromal	HSP90B1_Stromal	Stromal	0.447218
HLA-A_Stromal~ITGB2_Stromal	HLA-A_Stromal	Stromal	ITGB2_Stromal	Stromal	0.299869
HLA-A_Stromal~P4HB_Stromal	HLA-A_Stromal	Stromal	P4HB_Stromal	Stromal	0.447629
HLA-A_Stromal~SDF4_Stromal	HLA-A_Stromal	Stromal	SDF4_Stromal	Stromal	0.377061
HLA-B_Stromal~HLA-C_Stromal	HLA-B_Stromal	Stromal	HLA-C_Stromal	Stromal	0.49285
HLA-B_Stromal~HLA-E_Stromal	HLA-B_Stromal	Stromal	HLA-E_Stromal	Stromal	0.364332
HLA-B_Stromal~KLRD1_Stromal	HLA-B_Stromal	Stromal	KLRD1_Stromal	Stromal	0.265638
HLA-C_Stromal~HLA-E_Stromal	HLA-C_Stromal	Stromal	HLA-E_Stromal	Stromal	0.352431
HLA-C_Stromal~HLA-F_Stromal	HLA-C_Stromal	Stromal	HLA-F_Stromal	Stromal	0.256054
HLA-DPA1_Stromal~HLA-F_Stromal	HLA-DPA1_Stromal	Stromal	HLA-F_Stromal	Stromal	0.106756
HLA-DPA1_Stromal~LTBP1_Stromal	HLA-DPA1_Stromal	Stromal	LTBP1_Stromal	Stromal	0.16698
HLA-DPA1_Stromal~PTPRS_Stromal	HLA-DPA1_Stromal	Stromal	PTPRS_Stromal	Stromal	0.130073
HLA-DRA_Stromal~HLA-DRB1_Stromal	HLA-DRA_Stromal	Stromal	HLA-DRB1_Stromal	Stromal	0.372979
HLA-DRA_Stromal~HSP90AA1_Stromal	HLA-DRA_Stromal	Stromal	HSP90AA1_Stromal	Stromal	0.399263
HLA-DRA_Stromal~HSP90B1_Stromal	HLA-DRA_Stromal	Stromal	HSP90B1_Stromal	Stromal	0.352896
HLA-DRA_Stromal~NR3C1_Stromal	HLA-DRA_Stromal	Stromal	NR3C1_Stromal	Stromal	0.246146
HLA-DRA_Stromal~PKM_Stromal	HLA-DRA_Stromal	Stromal	PKM_Stromal	Stromal	0.412169
HLA-DRA_Stromal~PLXNA1_Stromal	HLA-DRA_Stromal	Stromal	PLXNA1_Stromal	Stromal	0.17951
HLA-DRB1_Stromal~HSP90AA1_Stromal	HLA-DRB1_Stromal	Stromal	HSP90AA1_Stromal	Stromal	0.434524
HLA-DRB1_Stromal~OGN_Stromal	HLA-DRB1_Stromal	Stromal	OGN_Stromal	Stromal	0.295564
HLA-DRB1_Stromal~PKM_Stromal	HLA-DRB1_Stromal	Stromal	PKM_Stromal	Stromal	0.447429
HLA-E_Stromal~HLA-F_Stromal	HLA-E_Stromal	Stromal	HLA-F_Stromal	Stromal	0.127536
HLA-E_Stromal~KLRC2_Stromal	HLA-E_Stromal	Stromal	KLRC2_Stromal	Stromal	0.201297
HLA-E_Stromal~KLRD1_Stromal	HLA-E_Stromal	Stromal	KLRD1_Stromal	Stromal	0.125218
HLA-E_Stromal~PLXNB2_Stromal	HLA-E_Stromal	Stromal	PLXNB2_Stromal	Stromal	0.195605
HLA-F_Stromal~PLTP_Stromal	HLA-F_Stromal	Stromal	PLTP_Stromal	Stromal	0.0871603
HMGB1_Stromal~HMGB2_Stromal	HMGB1_Stromal	Stromal	HMGB2_Stromal	Stromal	0.244028
HMGB1_Stromal~HSP90AA1_Stromal	HMGB1_Stromal	Stromal	HSP90AA1_Stromal	Stromal	0.467884
HMGB1_Stromal~HSPG2_Stromal	HMGB1_Stromal	Stromal	HSPG2_Stromal	Stromal	0.28105
HMGB1_Stromal~ITGAV_Stromal	HMGB1_Stromal	Stromal	ITGAV_Stromal	Stromal	0.321689
HMGB1_Stromal~ITGB1_Stromal	HMGB1_Stromal	Stromal	ITGB1_Stromal	Stromal	0.425422
HMGB1_Stromal~LGALS1_Stromal	HMGB1_Stromal	Stromal	LGALS1_Stromal	Stromal	0.603435
HMGB1_Stromal~MIF_Stromal	HMGB1_Stromal	Stromal	MIF_Stromal	Stromal	0.392484
HMGB1_Stromal~NR3C1_Stromal	HMGB1_Stromal	Stromal	NR3C1_Stromal	Stromal	0.314766
HMGB1_Stromal~PKM_Stromal	HMGB1_Stromal	Stromal	PKM_Stromal	Stromal	0.480789
HMGB1_Stromal~PPT1_Stromal	HMGB1_Stromal	Stromal	PPT1_Stromal	Stromal	0.279609
HMGB1_Stromal~S100A8_Stromal	HMGB1_Stromal	Stromal	S100A8_Stromal	Stromal	0.263895
HMGB1_Stromal~VCAM1_Stromal	HMGB1_Stromal	Stromal	VCAM1_Stromal	Stromal	0.350668
HMGB2_Stromal~HSPG2_Stromal	HMGB2_Stromal	Stromal	HSPG2_Stromal	Stromal	0.0501184
HMGB2_Stromal~ITGAV_Stromal	HMGB2_Stromal	Stromal	ITGAV_Stromal	Stromal	0.0907571
HMGB2_Stromal~ITGB1_Stromal	HMGB2_Stromal	Stromal	ITGB1_Stromal	Stromal	0.194491
HMGB2_Stromal~LGALS1_Stromal	HMGB2_Stromal	Stromal	LGALS1_Stromal	Stromal	0.372504
HMGB2_Stromal~MIF_Stromal	HMGB2_Stromal	Stromal	MIF_Stromal	Stromal	0.161553
HMGB2_Stromal~NR3C1_Stromal	HMGB2_Stromal	Stromal	NR3C1_Stromal	Stromal	0.0838347
HMGB2_Stromal~NR4A1_Stromal	HMGB2_Stromal	Stromal	NR4A1_Stromal	Stromal	0.0203284
HMGB2_Stromal~PKM_Stromal	HMGB2_Stromal	Stromal	PKM_Stromal	Stromal	0.249857
HMGB2_Stromal~PPT1_Stromal	HMGB2_Stromal	Stromal	PPT1_Stromal	Stromal	0.0486771
HMGB2_Stromal~S100A8_Stromal	HMGB2_Stromal	Stromal	S100A8_Stromal	Stromal	0.0329631
HMGB2_Stromal~VCAM1_Stromal	HMGB2_Stromal	Stromal	VCAM1_Stromal	Stromal	0.119736
HNRNPM_Stromal~HSD17B12_Stromal	HNRNPM_Stromal	Stromal	HSD17B12_Stromal	Stromal	0.141237
HNRNPM_Stromal~HSP90AA1_Stromal	HNRNPM_Stromal	Stromal	HSP90AA1_Stromal	Stromal	0.337539
HNRNPM_Stromal~HTRA1_Stromal	HNRNPM_Stromal	Stromal	HTRA1_Stromal	Stromal	0.325299
HNRNPM_Stromal~LEPRE1_Stromal	HNRNPM_Stromal	Stromal	LEPRE1_Stromal	Stromal	0.186886
HNRNPM_Stromal~M6PR_Stromal	HNRNPM_Stromal	Stromal	M6PR_Stromal	Stromal	0.1104
HNRNPM_Stromal~P4HB_Stromal	HNRNPM_Stromal	Stromal	P4HB_Stromal	Stromal	0.291583
HNRNPM_Stromal~PKM_Stromal	HNRNPM_Stromal	Stromal	PKM_Stromal	Stromal	0.350444
HNRNPM_Stromal~RPSA_Stromal	HNRNPM_Stromal	Stromal	RPSA_Stromal	Stromal	0.301238
HNRNPM_Stromal~S100A8_Stromal	HNRNPM_Stromal	Stromal	S100A8_Stromal	Stromal	0.13355
HNRNPM_Stromal~SDF4_Stromal	HNRNPM_Stromal	Stromal	SDF4_Stromal	Stromal	0.221015
HNRNPM_Stromal~SLC1A5_Stromal	HNRNPM_Stromal	Stromal	SLC1A5_Stromal	Stromal	0.117853
HNRNPM_Stromal~SMC3_Stromal	HNRNPM_Stromal	Stromal	SMC3_Stromal	Stromal	0.175803
HNRNPM_Stromal~STOML2_Stromal	HNRNPM_Stromal	Stromal	STOML2_Stromal	Stromal	0.168359
HNRNPM_Stromal~TMED1_Stromal	HNRNPM_Stromal	Stromal	TMED1_Stromal	Stromal	0.172491
HNRNPM_Stromal~VCAM1_Stromal	HNRNPM_Stromal	Stromal	VCAM1_Stromal	Stromal	0.220323
HPCAL1_Stromal~TGFBR1_Stromal	HPCAL1_Stromal	Stromal	TGFBR1_Stromal	Stromal	0.101042
HSD17B12_Stromal~HSP90AA1_Stromal	HSD17B12_Stromal	Stromal	HSP90AA1_Stromal	Stromal	0.264506
HSD17B12_Stromal~HSP90B1_Stromal	HSD17B12_Stromal	Stromal	HSP90B1_Stromal	Stromal	0.218138
HSD17B12_Stromal~M6PR_Stromal	HSD17B12_Stromal	Stromal	M6PR_Stromal	Stromal	0.0373666
HSD17B12_Stromal~RPSA_Stromal	HSD17B12_Stromal	Stromal	RPSA_Stromal	Stromal	0.228204
HSD17B12_Stromal~RUNX1_Stromal	HSD17B12_Stromal	Stromal	RUNX1_Stromal	Stromal	0.0491574
HSD17B12_Stromal~SDF4_Stromal	HSD17B12_Stromal	Stromal	SDF4_Stromal	Stromal	0.147981
HSD17B12_Stromal~SLC1A5_Stromal	HSD17B12_Stromal	Stromal	SLC1A5_Stromal	Stromal	0.0448194
HSD17B12_Stromal~SMC3_Stromal	HSD17B12_Stromal	Stromal	SMC3_Stromal	Stromal	0.10277
HSD17B12_Stromal~SOD1_Stromal	HSD17B12_Stromal	Stromal	SOD1_Stromal	Stromal	0.182559
HSD17B12_Stromal~STOML2_Stromal	HSD17B12_Stromal	Stromal	STOML2_Stromal	Stromal	0.0953254
HSD17B12_Stromal~TGFB1_Stromal	HSD17B12_Stromal	Stromal	TGFB1_Stromal	Stromal	0.171203
HSP90AA1_Stromal~HSP90B1_Stromal	HSP90AA1_Stromal	Stromal	HSP90B1_Stromal	Stromal	0.41444
HSP90AA1_Stromal~ITGA11_Stromal	HSP90AA1_Stromal	Stromal	ITGA11_Stromal	Stromal	0.344695
HSP90AA1_Stromal~ITGAV_Stromal	HSP90AA1_Stromal	Stromal	ITGAV_Stromal	Stromal	0.314613
HSP90AA1_Stromal~ITGB1_Stromal	HSP90AA1_Stromal	Stromal	ITGB1_Stromal	Stromal	0.418346
HSP90AA1_Stromal~LEPRE1_Stromal	HSP90AA1_Stromal	Stromal	LEPRE1_Stromal	Stromal	0.310154
HSP90AA1_Stromal~LGALS1_Stromal	HSP90AA1_Stromal	Stromal	LGALS1_Stromal	Stromal	0.596359
HSP90AA1_Stromal~LGALS3BP_Stromal	HSP90AA1_Stromal	Stromal	LGALS3BP_Stromal	Stromal	0.403246
HSP90AA1_Stromal~LOX_Stromal	HSP90AA1_Stromal	Stromal	LOX_Stromal	Stromal	0.241415
HSP90AA1_Stromal~LRP1_Stromal	HSP90AA1_Stromal	Stromal	LRP1_Stromal	Stromal	0.393005
HSP90AA1_Stromal~M6PR_Stromal	HSP90AA1_Stromal	Stromal	M6PR_Stromal	Stromal	0.233669
HSP90AA1_Stromal~MIF_Stromal	HSP90AA1_Stromal	Stromal	MIF_Stromal	Stromal	0.385408
HSP90AA1_Stromal~MMP2_Stromal	HSP90AA1_Stromal	Stromal	MMP2_Stromal	Stromal	0.442558
HSP90AA1_Stromal~NISCH_Stromal	HSP90AA1_Stromal	Stromal	NISCH_Stromal	Stromal	0.25936
HSP90AA1_Stromal~NR3C1_Stromal	HSP90AA1_Stromal	Stromal	NR3C1_Stromal	Stromal	0.30769
HSP90AA1_Stromal~P4HB_Stromal	HSP90AA1_Stromal	Stromal	P4HB_Stromal	Stromal	0.414851
HSP90AA1_Stromal~PDGFRB_Stromal	HSP90AA1_Stromal	Stromal	PDGFRB_Stromal	Stromal	0.330215
HSP90AA1_Stromal~PKM_Stromal	HSP90AA1_Stromal	Stromal	PKM_Stromal	Stromal	0.473713
HSP90AA1_Stromal~ROR2_Stromal	HSP90AA1_Stromal	Stromal	ROR2_Stromal	Stromal	0.280939
HSP90AA1_Stromal~RPSA_Stromal	HSP90AA1_Stromal	Stromal	RPSA_Stromal	Stromal	0.424506
HSP90AA1_Stromal~S100A4_Stromal	HSP90AA1_Stromal	Stromal	S100A4_Stromal	Stromal	0.545604
HSP90AA1_Stromal~S100A8_Stromal	HSP90AA1_Stromal	Stromal	S100A8_Stromal	Stromal	0.256819
HSP90AA1_Stromal~SDF4_Stromal	HSP90AA1_Stromal	Stromal	SDF4_Stromal	Stromal	0.344283
HSP90AA1_Stromal~SLC1A5_Stromal	HSP90AA1_Stromal	Stromal	SLC1A5_Stromal	Stromal	0.241121
HSP90AA1_Stromal~SOD1_Stromal	HSP90AA1_Stromal	Stromal	SOD1_Stromal	Stromal	0.378861
HSP90AA1_Stromal~STOML2_Stromal	HSP90AA1_Stromal	Stromal	STOML2_Stromal	Stromal	0.291627
HSP90AA1_Stromal~TGFBR1_Stromal	HSP90AA1_Stromal	Stromal	TGFBR1_Stromal	Stromal	0.277495
HSP90AA1_Stromal~TGFBR2_Stromal	HSP90AA1_Stromal	Stromal	TGFBR2_Stromal	Stromal	0.330782
HSP90AA1_Stromal~THBS1_Stromal	HSP90AA1_Stromal	Stromal	THBS1_Stromal	Stromal	0.251685
HSP90AA1_Stromal~TNFRSF1A_Stromal	HSP90AA1_Stromal	Stromal	TNFRSF1A_Stromal	Stromal	0.338442
HSP90AA1_Stromal~TXLNA_Stromal	HSP90AA1_Stromal	Stromal	TXLNA_Stromal	Stromal	0.231027
HSP90AA1_Stromal~VCAM1_Stromal	HSP90AA1_Stromal	Stromal	VCAM1_Stromal	Stromal	0.343592
HSP90B1_Stromal~ITGB1_Stromal	HSP90B1_Stromal	Stromal	ITGB1_Stromal	Stromal	0.371979
HSP90B1_Stromal~ITGB2_Stromal	HSP90B1_Stromal	Stromal	ITGB2_Stromal	Stromal	0.220724
HSP90B1_Stromal~LEPRE1_Stromal	HSP90B1_Stromal	Stromal	LEPRE1_Stromal	Stromal	0.263787
HSP90B1_Stromal~LGALS3BP_Stromal	HSP90B1_Stromal	Stromal	LGALS3BP_Stromal	Stromal	0.356879
HSP90B1_Stromal~LRP1_Stromal	HSP90B1_Stromal	Stromal	LRP1_Stromal	Stromal	0.346637
HSP90B1_Stromal~NR4A1_Stromal	HSP90B1_Stromal	Stromal	NR4A1_Stromal	Stromal	0.197817
HSP90B1_Stromal~P4HB_Stromal	HSP90B1_Stromal	Stromal	P4HB_Stromal	Stromal	0.368484
HSP90B1_Stromal~PKM_Stromal	HSP90B1_Stromal	Stromal	PKM_Stromal	Stromal	0.427345
HSP90B1_Stromal~PSAP_Stromal	HSP90B1_Stromal	Stromal	PSAP_Stromal	Stromal	0.400193
HSP90B1_Stromal~RPSA_Stromal	HSP90B1_Stromal	Stromal	RPSA_Stromal	Stromal	0.378139
HSP90B1_Stromal~S100A4_Stromal	HSP90B1_Stromal	Stromal	S100A4_Stromal	Stromal	0.499237
HSP90B1_Stromal~SDF4_Stromal	HSP90B1_Stromal	Stromal	SDF4_Stromal	Stromal	0.297916
HSPG2_Stromal~ITGA10_Stromal	HSPG2_Stromal	Stromal	ITGA10_Stromal	Stromal	0.207378
HSPG2_Stromal~ITGA11_Stromal	HSPG2_Stromal	Stromal	ITGA11_Stromal	Stromal	0.157862
HSPG2_Stromal~ITGAE_Stromal	HSPG2_Stromal	Stromal	ITGAE_Stromal	Stromal	0.0812265
HSPG2_Stromal~ITGAV_Stromal	HSPG2_Stromal	Stromal	ITGAV_Stromal	Stromal	0.127779
HSPG2_Stromal~ITGB1_Stromal	HSPG2_Stromal	Stromal	ITGB1_Stromal	Stromal	0.231513
HSPG2_Stromal~ITGB2_Stromal	HSPG2_Stromal	Stromal	ITGB2_Stromal	Stromal	0.0802582
HSPG2_Stromal~ITGB5_Stromal	HSPG2_Stromal	Stromal	ITGB5_Stromal	Stromal	0.194875
HSPG2_Stromal~LAMA4_Stromal	HSPG2_Stromal	Stromal	LAMA4_Stromal	Stromal	0.164238
HSPG2_Stromal~LAMB1_Stromal	HSPG2_Stromal	Stromal	LAMB1_Stromal	Stromal	0.117533
HSPG2_Stromal~LAMB2_Stromal	HSPG2_Stromal	Stromal	LAMB2_Stromal	Stromal	0.172128
HSPG2_Stromal~LAMC1_Stromal	HSPG2_Stromal	Stromal	LAMC1_Stromal	Stromal	0.0898179
HSPG2_Stromal~LGALS1_Stromal	HSPG2_Stromal	Stromal	LGALS1_Stromal	Stromal	0.409526
HSPG2_Stromal~LOX_Stromal	HSPG2_Stromal	Stromal	LOX_Stromal	Stromal	0.054582
HSPG2_Stromal~LRP1_Stromal	HSPG2_Stromal	Stromal	LRP1_Stromal	Stromal	0.206171
HSPG2_Stromal~LTBP2_Stromal	HSPG2_Stromal	Stromal	LTBP2_Stromal	Stromal	0.138954
HSPG2_Stromal~LUM_Stromal	HSPG2_Stromal	Stromal	LUM_Stromal	Stromal	0.380491
HSPG2_Stromal~MFAP2_Stromal	HSPG2_Stromal	Stromal	MFAP2_Stromal	Stromal	0.0655661
HSPG2_Stromal~MMP13_Stromal	HSPG2_Stromal	Stromal	MMP13_Stromal	Stromal	0.28317
HSPG2_Stromal~MMP14_Stromal	HSPG2_Stromal	Stromal	MMP14_Stromal	Stromal	0.212829
HSPG2_Stromal~NID1_Stromal	HSPG2_Stromal	Stromal	NID1_Stromal	Stromal	0.0765143
HSPG2_Stromal~NID2_Stromal	HSPG2_Stromal	Stromal	NID2_Stromal	Stromal	0.0685485
HSPG2_Stromal~PDGFA_Stromal	HSPG2_Stromal	Stromal	PDGFA_Stromal	Stromal	0.0637632
HSPG2_Stromal~PKM_Stromal	HSPG2_Stromal	Stromal	PKM_Stromal	Stromal	0.286879
HSPG2_Stromal~PTPRA_Stromal	HSPG2_Stromal	Stromal	PTPRA_Stromal	Stromal	0.0726568
HSPG2_Stromal~SDC4_Stromal	HSPG2_Stromal	Stromal	SDC4_Stromal	Stromal	0.0571637
HSPG2_Stromal~SMC3_Stromal	HSPG2_Stromal	Stromal	SMC3_Stromal	Stromal	0.112238
HSPG2_Stromal~SPARC_Stromal	HSPG2_Stromal	Stromal	SPARC_Stromal	Stromal	0.383975
HSPG2_Stromal~TNC_Stromal	HSPG2_Stromal	Stromal	TNC_Stromal	Stromal	0.259195
HSPG2_Stromal~VCAN_Stromal	HSPG2_Stromal	Stromal	VCAN_Stromal	Stromal	0.183363
HSPG2_Stromal~WNT5B_Stromal	HSPG2_Stromal	Stromal	WNT5B_Stromal	Stromal	0.10987
HTRA1_Stromal~PKM_Stromal	HTRA1_Stromal	Stromal	PKM_Stromal	Stromal	0.461473
IFNAR1_Stromal~IFNGR1_Stromal	IFNAR1_Stromal	Stromal	IFNGR1_Stromal	Stromal	0.0835185
IFNAR1_Stromal~IFNGR2_Stromal	IFNAR1_Stromal	Stromal	IFNGR2_Stromal	Stromal	0.11954
IFNAR1_Stromal~IL10RB_Stromal	IFNAR1_Stromal	Stromal	IL10RB_Stromal	Stromal	0.0801296
IFNAR1_Stromal~IL13RA1_Stromal	IFNAR1_Stromal	Stromal	IL13RA1_Stromal	Stromal	0.0455505
IFNAR1_Stromal~IL1R1_Stromal	IFNAR1_Stromal	Stromal	IL1R1_Stromal	Stromal	0.103475
IFNAR1_Stromal~IL4R_Stromal	IFNAR1_Stromal	Stromal	IL4R_Stromal	Stromal	0.0429639
IFNAR1_Stromal~IL6ST_Stromal	IFNAR1_Stromal	Stromal	IL6ST_Stromal	Stromal	0.0814593
IFNAR1_Stromal~LIFR_Stromal	IFNAR1_Stromal	Stromal	LIFR_Stromal	Stromal	0.0774233
IFNAR1_Stromal~OSMR_Stromal	IFNAR1_Stromal	Stromal	OSMR_Stromal	Stromal	0.0721089
IFNAR1_Stromal~TNFSF10_Stromal	IFNAR1_Stromal	Stromal	TNFSF10_Stromal	Stromal	0.167749
IFNAR1_Stromal~TXLNA_Stromal	IFNAR1_Stromal	Stromal	TXLNA_Stromal	Stromal	0.0375569
IFNGR1_Stromal~IFNGR2_Stromal	IFNGR1_Stromal	Stromal	IFNGR2_Stromal	Stromal	0.129191
IFNGR1_Stromal~IL10RB_Stromal	IFNGR1_Stromal	Stromal	IL10RB_Stromal	Stromal	0.08978
IFNGR1_Stromal~IL13RA1_Stromal	IFNGR1_Stromal	Stromal	IL13RA1_Stromal	Stromal	0.0552009
IFNGR1_Stromal~IL1R1_Stromal	IFNGR1_Stromal	Stromal	IL1R1_Stromal	Stromal	0.113125
IFNGR1_Stromal~IL4R_Stromal	IFNGR1_Stromal	Stromal	IL4R_Stromal	Stromal	0.0526142
IFNGR1_Stromal~IL6ST_Stromal	IFNGR1_Stromal	Stromal	IL6ST_Stromal	Stromal	0.0911097
IFNGR1_Stromal~LIFR_Stromal	IFNGR1_Stromal	Stromal	LIFR_Stromal	Stromal	0.0870737
IFNGR1_Stromal~OSMR_Stromal	IFNGR1_Stromal	Stromal	OSMR_Stromal	Stromal	0.0817593
IFNGR1_Stromal~TNFSF10_Stromal	IFNGR1_Stromal	Stromal	TNFSF10_Stromal	Stromal	0.177399
IFNGR1_Stromal~TXLNA_Stromal	IFNGR1_Stromal	Stromal	TXLNA_Stromal	Stromal	0.0472073
IFNGR2_Stromal~IL10RB_Stromal	IFNGR2_Stromal	Stromal	IL10RB_Stromal	Stromal	0.125802
IFNGR2_Stromal~IL13RA1_Stromal	IFNGR2_Stromal	Stromal	IL13RA1_Stromal	Stromal	0.0912227
IFNGR2_Stromal~IL1R1_Stromal	IFNGR2_Stromal	Stromal	IL1R1_Stromal	Stromal	0.149147
IFNGR2_Stromal~IL4R_Stromal	IFNGR2_Stromal	Stromal	IL4R_Stromal	Stromal	0.0886361
IFNGR2_Stromal~IL6ST_Stromal	IFNGR2_Stromal	Stromal	IL6ST_Stromal	Stromal	0.127132
IFNGR2_Stromal~LIFR_Stromal	IFNGR2_Stromal	Stromal	LIFR_Stromal	Stromal	0.123096
IFNGR2_Stromal~NR3C1_Stromal	IFNGR2_Stromal	Stromal	NR3C1_Stromal	Stromal	0.159893
IFNGR2_Stromal~OSMR_Stromal	IFNGR2_Stromal	Stromal	OSMR_Stromal	Stromal	0.117781
IFNGR2_Stromal~TNFSF10_Stromal	IFNGR2_Stromal	Stromal	TNFSF10_Stromal	Stromal	0.213421
IFNGR2_Stromal~TXLNA_Stromal	IFNGR2_Stromal	Stromal	TXLNA_Stromal	Stromal	0.0832291
IGFBP7_Stromal~INHBA_Stromal	IGFBP7_Stromal	Stromal	INHBA_Stromal	Stromal	0.258869
IL10RB_Stromal~IL13RA1_Stromal	IL10RB_Stromal	Stromal	IL13RA1_Stromal	Stromal	0.051812
IL10RB_Stromal~IL1R1_Stromal	IL10RB_Stromal	Stromal	IL1R1_Stromal	Stromal	0.109736
IL10RB_Stromal~IL4R_Stromal	IL10RB_Stromal	Stromal	IL4R_Stromal	Stromal	0.0492253
IL10RB_Stromal~IL6ST_Stromal	IL10RB_Stromal	Stromal	IL6ST_Stromal	Stromal	0.0877208
IL10RB_Stromal~LIFR_Stromal	IL10RB_Stromal	Stromal	LIFR_Stromal	Stromal	0.0836848
IL10RB_Stromal~OSMR_Stromal	IL10RB_Stromal	Stromal	OSMR_Stromal	Stromal	0.0783704
IL10RB_Stromal~TNFSF10_Stromal	IL10RB_Stromal	Stromal	TNFSF10_Stromal	Stromal	0.17401
IL10RB_Stromal~TXLNA_Stromal	IL10RB_Stromal	Stromal	TXLNA_Stromal	Stromal	0.0438184
IL13RA1_Stromal~IL1R1_Stromal	IL13RA1_Stromal	Stromal	IL1R1_Stromal	Stromal	0.0751573
IL13RA1_Stromal~IL4R_Stromal	IL13RA1_Stromal	Stromal	IL4R_Stromal	Stromal	0.0146463
IL13RA1_Stromal~IL6ST_Stromal	IL13RA1_Stromal	Stromal	IL6ST_Stromal	Stromal	0.0531417
IL13RA1_Stromal~LIFR_Stromal	IL13RA1_Stromal	Stromal	LIFR_Stromal	Stromal	0.0491057
IL13RA1_Stromal~OSMR_Stromal	IL13RA1_Stromal	Stromal	OSMR_Stromal	Stromal	0.0437913
IL13RA1_Stromal~TNFSF10_Stromal	IL13RA1_Stromal	Stromal	TNFSF10_Stromal	Stromal	0.139431
IL13RA1_Stromal~TXLNA_Stromal	IL13RA1_Stromal	Stromal	TXLNA_Stromal	Stromal	0.00923928
IL1R1_Stromal~IL4R_Stromal	IL1R1_Stromal	Stromal	IL4R_Stromal	Stromal	0.0725707
IL1R1_Stromal~IL6ST_Stromal	IL1R1_Stromal	Stromal	IL6ST_Stromal	Stromal	0.111066
IL1R1_Stromal~LIFR_Stromal	IL1R1_Stromal	Stromal	LIFR_Stromal	Stromal	0.10703
IL1R1_Stromal~OSMR_Stromal	IL1R1_Stromal	Stromal	OSMR_Stromal	Stromal	0.101716
IL1R1_Stromal~PDGFRB_Stromal	IL1R1_Stromal	Stromal	PDGFRB_Stromal	Stromal	0.166352
IL1R1_Stromal~TNFSF10_Stromal	IL1R1_Stromal	Stromal	TNFSF10_Stromal	Stromal	0.197356
IL1R1_Stromal~TXLNA_Stromal	IL1R1_Stromal	Stromal	TXLNA_Stromal	Stromal	0.0671637
IL32_Stromal~ITGAV_Stromal	IL32_Stromal	Stromal	ITGAV_Stromal	Stromal	0.223322
IL4R_Stromal~MFGE8_Stromal	IL4R_Stromal	Stromal	MFGE8_Stromal	Stromal	0.155928
IL6ST_Stromal~LIFR_Stromal	IL6ST_Stromal	Stromal	LIFR_Stromal	Stromal	0.0850145
IL6ST_Stromal~OSMR_Stromal	IL6ST_Stromal	Stromal	OSMR_Stromal	Stromal	0.0797001
IL6ST_Stromal~PLAUR_Stromal	IL6ST_Stromal	Stromal	PLAUR_Stromal	Stromal	0.164597
ITGA10_Stromal~ITGA11_Stromal	ITGA10_Stromal	Stromal	ITGA11_Stromal	Stromal	0.278099
ITGA10_Stromal~ITGAE_Stromal	ITGA10_Stromal	Stromal	ITGAE_Stromal	Stromal	0.201464
ITGA10_Stromal~ITGAV_Stromal	ITGA10_Stromal	Stromal	ITGAV_Stromal	Stromal	0.248017
ITGA10_Stromal~ITGB1_Stromal	ITGA10_Stromal	Stromal	ITGB1_Stromal	Stromal	0.35175
ITGA10_Stromal~ITGB2_Stromal	ITGA10_Stromal	Stromal	ITGB2_Stromal	Stromal	0.200495
ITGA10_Stromal~ITGB5_Stromal	ITGA10_Stromal	Stromal	ITGB5_Stromal	Stromal	0.315112
ITGA10_Stromal~ITGBL1_Stromal	ITGA10_Stromal	Stromal	ITGBL1_Stromal	Stromal	0.208964
ITGA10_Stromal~LAMA4_Stromal	ITGA10_Stromal	Stromal	LAMA4_Stromal	Stromal	0.284475
ITGA10_Stromal~LAMB1_Stromal	ITGA10_Stromal	Stromal	LAMB1_Stromal	Stromal	0.23777
ITGA10_Stromal~LAMB2_Stromal	ITGA10_Stromal	Stromal	LAMB2_Stromal	Stromal	0.292365
ITGA10_Stromal~LAMC1_Stromal	ITGA10_Stromal	Stromal	LAMC1_Stromal	Stromal	0.210055
ITGA10_Stromal~LUM_Stromal	ITGA10_Stromal	Stromal	LUM_Stromal	Stromal	0.500728
ITGA10_Stromal~SDC4_Stromal	ITGA10_Stromal	Stromal	SDC4_Stromal	Stromal	0.177401
ITGA10_Stromal~SMC3_Stromal	ITGA10_Stromal	Stromal	SMC3_Stromal	Stromal	0.232476
ITGA10_Stromal~TNC_Stromal	ITGA10_Stromal	Stromal	TNC_Stromal	Stromal	0.379432
ITGA10_Stromal~VCAN_Stromal	ITGA10_Stromal	Stromal	VCAN_Stromal	Stromal	0.3036
ITGA11_Stromal~ITGAE_Stromal	ITGA11_Stromal	Stromal	ITGAE_Stromal	Stromal	0.151948
ITGA11_Stromal~ITGAV_Stromal	ITGA11_Stromal	Stromal	ITGAV_Stromal	Stromal	0.198501
ITGA11_Stromal~ITGB1_Stromal	ITGA11_Stromal	Stromal	ITGB1_Stromal	Stromal	0.302234
ITGA11_Stromal~ITGB2_Stromal	ITGA11_Stromal	Stromal	ITGB2_Stromal	Stromal	0.15098
ITGA11_Stromal~ITGB5_Stromal	ITGA11_Stromal	Stromal	ITGB5_Stromal	Stromal	0.265596
ITGA11_Stromal~ITGBL1_Stromal	ITGA11_Stromal	Stromal	ITGBL1_Stromal	Stromal	0.159448
ITGA11_Stromal~LAMA4_Stromal	ITGA11_Stromal	Stromal	LAMA4_Stromal	Stromal	0.234959
ITGA11_Stromal~LAMB1_Stromal	ITGA11_Stromal	Stromal	LAMB1_Stromal	Stromal	0.188254
ITGA11_Stromal~LAMB2_Stromal	ITGA11_Stromal	Stromal	LAMB2_Stromal	Stromal	0.242849
ITGA11_Stromal~LAMC1_Stromal	ITGA11_Stromal	Stromal	LAMC1_Stromal	Stromal	0.160539
ITGA11_Stromal~LOX_Stromal	ITGA11_Stromal	Stromal	LOX_Stromal	Stromal	0.125303
ITGA11_Stromal~LUM_Stromal	ITGA11_Stromal	Stromal	LUM_Stromal	Stromal	0.451212
ITGA11_Stromal~SDC4_Stromal	ITGA11_Stromal	Stromal	SDC4_Stromal	Stromal	0.127885
ITGA11_Stromal~SMC3_Stromal	ITGA11_Stromal	Stromal	SMC3_Stromal	Stromal	0.18296
ITGA11_Stromal~THBS1_Stromal	ITGA11_Stromal	Stromal	THBS1_Stromal	Stromal	0.135573
ITGA11_Stromal~TNC_Stromal	ITGA11_Stromal	Stromal	TNC_Stromal	Stromal	0.329916
ITGA11_Stromal~VCAN_Stromal	ITGA11_Stromal	Stromal	VCAN_Stromal	Stromal	0.254084
ITGAE_Stromal~ITGAV_Stromal	ITGAE_Stromal	Stromal	ITGAV_Stromal	Stromal	0.121865
ITGAE_Stromal~ITGB1_Stromal	ITGAE_Stromal	Stromal	ITGB1_Stromal	Stromal	0.225599
ITGAE_Stromal~ITGB2_Stromal	ITGAE_Stromal	Stromal	ITGB2_Stromal	Stromal	0.074344
ITGAE_Stromal~ITGB5_Stromal	ITGAE_Stromal	Stromal	ITGB5_Stromal	Stromal	0.18896
ITGAE_Stromal~ITGBL1_Stromal	ITGAE_Stromal	Stromal	ITGBL1_Stromal	Stromal	0.0828125
ITGAE_Stromal~LAMA4_Stromal	ITGAE_Stromal	Stromal	LAMA4_Stromal	Stromal	0.158323
ITGAE_Stromal~LAMB1_Stromal	ITGAE_Stromal	Stromal	LAMB1_Stromal	Stromal	0.111618
ITGAE_Stromal~LAMB2_Stromal	ITGAE_Stromal	Stromal	LAMB2_Stromal	Stromal	0.166213
ITGAE_Stromal~LAMC1_Stromal	ITGAE_Stromal	Stromal	LAMC1_Stromal	Stromal	0.0839038
ITGAE_Stromal~LUM_Stromal	ITGAE_Stromal	Stromal	LUM_Stromal	Stromal	0.374577
ITGAE_Stromal~SDC4_Stromal	ITGAE_Stromal	Stromal	SDC4_Stromal	Stromal	0.0512495
ITGAE_Stromal~SMC3_Stromal	ITGAE_Stromal	Stromal	SMC3_Stromal	Stromal	0.106324
ITGAE_Stromal~TNC_Stromal	ITGAE_Stromal	Stromal	TNC_Stromal	Stromal	0.253281
ITGAE_Stromal~VCAN_Stromal	ITGAE_Stromal	Stromal	VCAN_Stromal	Stromal	0.177449
ITGAV_Stromal~ITGB1_Stromal	ITGAV_Stromal	Stromal	ITGB1_Stromal	Stromal	0.272151
ITGAV_Stromal~ITGB2_Stromal	ITGAV_Stromal	Stromal	ITGB2_Stromal	Stromal	0.120897
ITGAV_Stromal~ITGB5_Stromal	ITGAV_Stromal	Stromal	ITGB5_Stromal	Stromal	0.235513
ITGAV_Stromal~ITGBL1_Stromal	ITGAV_Stromal	Stromal	ITGBL1_Stromal	Stromal	0.129365
ITGAV_Stromal~LAMA4_Stromal	ITGAV_Stromal	Stromal	LAMA4_Stromal	Stromal	0.204876
ITGAV_Stromal~LAMB1_Stromal	ITGAV_Stromal	Stromal	LAMB1_Stromal	Stromal	0.158171
ITGAV_Stromal~LAMB2_Stromal	ITGAV_Stromal	Stromal	LAMB2_Stromal	Stromal	0.212766
ITGAV_Stromal~LAMC1_Stromal	ITGAV_Stromal	Stromal	LAMC1_Stromal	Stromal	0.130457
ITGAV_Stromal~LEPRE1_Stromal	ITGAV_Stromal	Stromal	LEPRE1_Stromal	Stromal	0.16396
ITGAV_Stromal~LGALS1_Stromal	ITGAV_Stromal	Stromal	LGALS1_Stromal	Stromal	0.450165
ITGAV_Stromal~LGALS3BP_Stromal	ITGAV_Stromal	Stromal	LGALS3BP_Stromal	Stromal	0.257052
ITGAV_Stromal~LRP1_Stromal	ITGAV_Stromal	Stromal	LRP1_Stromal	Stromal	0.24681
ITGAV_Stromal~LUM_Stromal	ITGAV_Stromal	Stromal	LUM_Stromal	Stromal	0.421129
ITGAV_Stromal~M6PR_Stromal	ITGAV_Stromal	Stromal	M6PR_Stromal	Stromal	0.0874739
ITGAV_Stromal~MFGE8_Stromal	ITGAV_Stromal	Stromal	MFGE8_Stromal	Stromal	0.234107
ITGAV_Stromal~MMP14_Stromal	ITGAV_Stromal	Stromal	MMP14_Stromal	Stromal	0.253468
ITGAV_Stromal~MMP2_Stromal	ITGAV_Stromal	Stromal	MMP2_Stromal	Stromal	0.296363
ITGAV_Stromal~NID1_Stromal	ITGAV_Stromal	Stromal	NID1_Stromal	Stromal	0.117153
ITGAV_Stromal~PDGFRA_Stromal	ITGAV_Stromal	Stromal	PDGFRA_Stromal	Stromal	0.168267
ITGAV_Stromal~PDGFRB_Stromal	ITGAV_Stromal	Stromal	PDGFRB_Stromal	Stromal	0.18402
ITGAV_Stromal~PKM_Stromal	ITGAV_Stromal	Stromal	PKM_Stromal	Stromal	0.327518
ITGAV_Stromal~PLAUR_Stromal	ITGAV_Stromal	Stromal	PLAUR_Stromal	Stromal	0.204281
ITGAV_Stromal~PLXNB2_Stromal	ITGAV_Stromal	Stromal	PLXNB2_Stromal	Stromal	0.167858
ITGAV_Stromal~PPT1_Stromal	ITGAV_Stromal	Stromal	PPT1_Stromal	Stromal	0.126338
ITGAV_Stromal~PSAP_Stromal	ITGAV_Stromal	Stromal	PSAP_Stromal	Stromal	0.300366
ITGAV_Stromal~SDC4_Stromal	ITGAV_Stromal	Stromal	SDC4_Stromal	Stromal	0.0978023
ITGAV_Stromal~SERPINE1_Stromal	ITGAV_Stromal	Stromal	SERPINE1_Stromal	Stromal	0.18076
ITGAV_Stromal~SMC3_Stromal	ITGAV_Stromal	Stromal	SMC3_Stromal	Stromal	0.152877
ITGAV_Stromal~SPP1_Stromal	ITGAV_Stromal	Stromal	SPP1_Stromal	Stromal	0.402135
ITGAV_Stromal~TGFB1_Stromal	ITGAV_Stromal	Stromal	TGFB1_Stromal	Stromal	0.221311
ITGAV_Stromal~TGFB3_Stromal	ITGAV_Stromal	Stromal	TGFB3_Stromal	Stromal	0.141423
ITGAV_Stromal~TGFBI_Stromal	ITGAV_Stromal	Stromal	TGFBI_Stromal	Stromal	0.26875
ITGAV_Stromal~TGFBR1_Stromal	ITGAV_Stromal	Stromal	TGFBR1_Stromal	Stromal	0.1313
ITGAV_Stromal~TGFBR2_Stromal	ITGAV_Stromal	Stromal	TGFBR2_Stromal	Stromal	0.184587
ITGAV_Stromal~THBS1_Stromal	ITGAV_Stromal	Stromal	THBS1_Stromal	Stromal	0.10549
ITGAV_Stromal~THY1_Stromal	ITGAV_Stromal	Stromal	THY1_Stromal	Stromal	0.263667
ITGAV_Stromal~TNC_Stromal	ITGAV_Stromal	Stromal	TNC_Stromal	Stromal	0.299833
ITGAV_Stromal~VCAN_Stromal	ITGAV_Stromal	Stromal	VCAN_Stromal	Stromal	0.224002
ITGB1_Stromal~ITGB2_Stromal	ITGB1_Stromal	Stromal	ITGB2_Stromal	Stromal	0.22463
ITGB1_Stromal~ITGB5_Stromal	ITGB1_Stromal	Stromal	ITGB5_Stromal	Stromal	0.339247
ITGB1_Stromal~LAMA4_Stromal	ITGB1_Stromal	Stromal	LAMA4_Stromal	Stromal	0.30861
ITGB1_Stromal~LAMB1_Stromal	ITGB1_Stromal	Stromal	LAMB1_Stromal	Stromal	0.261905
ITGB1_Stromal~LAMB2_Stromal	ITGB1_Stromal	Stromal	LAMB2_Stromal	Stromal	0.3165
ITGB1_Stromal~LAMC1_Stromal	ITGB1_Stromal	Stromal	LAMC1_Stromal	Stromal	0.23419
ITGB1_Stromal~LEPRE1_Stromal	ITGB1_Stromal	Stromal	LEPRE1_Stromal	Stromal	0.267693
ITGB1_Stromal~LGALS1_Stromal	ITGB1_Stromal	Stromal	LGALS1_Stromal	Stromal	0.553898
ITGB1_Stromal~LGALS3_Stromal	ITGB1_Stromal	Stromal	LGALS3_Stromal	Stromal	0.379093
ITGB1_Stromal~LGALS3BP_Stromal	ITGB1_Stromal	Stromal	LGALS3BP_Stromal	Stromal	0.360785
ITGB1_Stromal~LUM_Stromal	ITGB1_Stromal	Stromal	LUM_Stromal	Stromal	0.524863
ITGB1_Stromal~M6PR_Stromal	ITGB1_Stromal	Stromal	M6PR_Stromal	Stromal	0.191207
ITGB1_Stromal~MDK_Stromal	ITGB1_Stromal	Stromal	MDK_Stromal	Stromal	0.371934
ITGB1_Stromal~MIF_Stromal	ITGB1_Stromal	Stromal	MIF_Stromal	Stromal	0.342947
ITGB1_Stromal~MMP2_Stromal	ITGB1_Stromal	Stromal	MMP2_Stromal	Stromal	0.400097
ITGB1_Stromal~MMP9_Stromal	ITGB1_Stromal	Stromal	MMP9_Stromal	Stromal	0.348417
ITGB1_Stromal~NID1_Stromal	ITGB1_Stromal	Stromal	NID1_Stromal	Stromal	0.220886
ITGB1_Stromal~NOTCH3_Stromal	ITGB1_Stromal	Stromal	NOTCH3_Stromal	Stromal	0.315139
ITGB1_Stromal~NRP1_Stromal	ITGB1_Stromal	Stromal	NRP1_Stromal	Stromal	0.216996
ITGB1_Stromal~P4HB_Stromal	ITGB1_Stromal	Stromal	P4HB_Stromal	Stromal	0.37239
ITGB1_Stromal~PKM_Stromal	ITGB1_Stromal	Stromal	PKM_Stromal	Stromal	0.431251
ITGB1_Stromal~PLAUR_Stromal	ITGB1_Stromal	Stromal	PLAUR_Stromal	Stromal	0.308014
ITGB1_Stromal~PLXNB2_Stromal	ITGB1_Stromal	Stromal	PLXNB2_Stromal	Stromal	0.271591
ITGB1_Stromal~PPT1_Stromal	ITGB1_Stromal	Stromal	PPT1_Stromal	Stromal	0.230071
ITGB1_Stromal~PSAP_Stromal	ITGB1_Stromal	Stromal	PSAP_Stromal	Stromal	0.404099
ITGB1_Stromal~PVRL2_Stromal	ITGB1_Stromal	Stromal	PVRL2_Stromal	Stromal	0.28953
ITGB1_Stromal~S100A8_Stromal	ITGB1_Stromal	Stromal	S100A8_Stromal	Stromal	0.214358
ITGB1_Stromal~SDC4_Stromal	ITGB1_Stromal	Stromal	SDC4_Stromal	Stromal	0.201536
[truncated: 67,874 more rows]
