# Supplementary material for: H3.3 G34W Promotes Growth and Impedes Differentiation of Osteoblast-Like Mesenchymal Progenitors in Giant Cell Tumor of Bone
Source: Oxford University Press journal article supplement (doi:10.1158/2159-8290.cd-20-0461), 2020-09-23
Supplement: 21598290cd200461-sup-241016_2_supp_6571121_qgmhq8.xlsx [file 21598290cd200461-sup-241016_2_supp_6571121_qgmhq8.xlsx]

## Sheet: Isogenic Lines
Table S2. Differential gene expression between G34W and edited lines derived from Im-GCT-4072, Im-GCT-3504 and Im-GCT-6176. Differential enrichment of H3K27me3 and H3K36me3 along the gene body is also provided for Im-GCT-4072. Significance was assessed using DESeq2.
Gene				RNA (Im-GCT-4072)				RNA (Im-GCT-3504)				RNA (Im-GCT-6176)				Genic H3K27me3 (Im-GCT-4072)				Genic H3K36me3 (Im-GCT-4072)				Promoter H3K27me3 (Im-GCT-4072)				Promoter H3K27ac (Im-GCT-4072)				Genic H3K27me3 (Im-GCT-3504)				Genic H3K36me3 (Im-GCT-3504)				Promoter H3K27me3 (Im-GCT-3504)				Promoter H3K27ac (Im-GCT-3504)
ENSG	HGNC	Gene Coordinates	Promoter Coordinates	baseMean	LFC	P	significant	baseMean	LFC	P	significant	baseMean	LFC	P	significant	baseMean	LFC	P	significant	baseMean	LFC	P	significant	baseMean	LFC	P	significant	baseMean	LFC	P	significant	baseMean	LFC	P	significant	baseMean	LFC	P	significant	baseMean	LFC	P	significant	baseMean	LFC	P	significant
ENSG00000000003	TSPAN6	NA	NA	2342.48	-0.280868	0.273987	FALSE	2181.77	-0.0923574	0.7301	FALSE	3489.49	-0.275831	0.341773	FALSE	NA	NA	NA	NA	NA	NA	NA	NA	NA	NA	NA	NA	NA	NA	NA	NA	NA	NA	NA	NA	NA	NA	NA	NA	NA	NA	NA	NA	NA	NA	NA	NA
ENSG00000000005	TNMD	chrX:99839798-99854882	chrX:99837298-99842298	8.45439	-3.37639	6.91885e-05	FALSE	3.63238	-3.1373	0.0805302	FALSE	4.43695	-1.71288	NA	FALSE	323.946	0.626694	0.16181	FALSE	44.9536	-0.373267	0.247171	FALSE	247.229	-0.218947	0.681101	FALSE	5.24663	0.0697713	NA	FALSE	160.129	0.494708	0.999947	FALSE	51.1343	-0.279777	0.999981	FALSE	70.6921	-0.149772	0.999877	FALSE	1.62148	-0.0356645	NA	FALSE
ENSG00000000419	DPM1	chr20:49551403-49575092	chr20:49572592-49577592	3797.29	-0.172448	0.571602	FALSE	3114.06	0.406785	1.03084e-13	FALSE	2050.89	0.312927	0.483669	FALSE	33.344	0.319739	0.72579	FALSE	1062.51	0.136427	0.358797	FALSE	4.89637	0.725313	NA	FALSE	485.113	-0.145784	0.793168	FALSE	37.0124	-0.120916	0.999947	FALSE	1580.35	-0.0354528	0.999981	FALSE	14.7676	-0.295966	NA	FALSE	468.039	0.215554	0.972962	FALSE
ENSG00000000457	SCYL3	chr1:169818771-169863408	chr1:169860908-169865908	2034.89	0.851324	0.000164079	FALSE	1148.71	0.426479	0.000321393	FALSE	1075.59	-0.120699	0.839686	FALSE	56.1568	0.644483	0.472101	FALSE	1812.95	0.446056	7.80299e-05	FALSE	14.7093	-0.367128	0.690802	FALSE	488.661	-0.0353669	0.951752	FALSE	72.212	0.0915347	0.999947	FALSE	2332.57	0.164148	0.999981	FALSE	18.1911	-0.343082	NA	FALSE	600.835	0.207387	0.974262	FALSE
ENSG00000000460	C1orf112	chr1:169631244-169823221	chr1:169628744-169633744	1520.37	0.174272	0.613047	FALSE	1512.72	0.400892	0.00128007	FALSE	2780.49	0.173261	0.561764	FALSE	7948.78	0.108711	0.82539	FALSE	2252.56	0.297939	0.0222731	FALSE	139.569	0.18938	0.734129	FALSE	7.19558	0.248443	NA	FALSE	2237.28	0.300108	0.999947	FALSE	3432.03	0.175479	0.999981	FALSE	65.0281	-0.0802325	0.999877	FALSE	2.46121	-0.0764751	NA	FALSE
ENSG00000000938	FGR	chr1:27938574-27961788	chr1:27959288-27964288	1.24244	3.72214	0.054104	FALSE	3.29781	-0.181745	0.922976	FALSE	1.61036	3.64391	NA	FALSE	313.496	0.159194	0.760978	FALSE	169.583	-0.291583	0.22441	FALSE	93.6042	-0.808337	0.103026	FALSE	35.1922	0.987326	0.0712188	FALSE	196.977	-0.343971	0.999947	FALSE	284.194	-0.0365116	0.999981	FALSE	95.0386	-0.573577	0.978768	FALSE	47.6377	0.870971	0.157856	FALSE
ENSG00000000971	CFH	chr1:196621007-196716634	chr1:196618507-196623507	21765.6	-0.163712	0.721672	FALSE	10747.4	-0.0272626	0.967444	FALSE	2726.15	-0.914623	0.120471	FALSE	162.717	0.298147	0.673385	FALSE	2025.85	0.0263422	0.889331	FALSE	7.49488	0.461485	NA	FALSE	140.297	-0.0549586	0.942007	FALSE	180.049	-0.0125329	0.999947	FALSE	2780.93	0.18996	0.999981	FALSE	9.2443	-0.032967	NA	FALSE	143.386	-0.02752	0.996074	FALSE
ENSG00000001036	FUCA2	chr6:143815947-143832827	chr6:143830327-143835327	11824.6	-0.241371	0.305775	FALSE	14093.1	-0.12429	0.276528	FALSE	13813.9	-0.137624	0.6573	FALSE	22.4017	0.570627	0.543457	FALSE	659.782	0.208563	0.223009	FALSE	11.8086	0.355875	NA	FALSE	212.387	-0.325559	0.390834	FALSE	39.802	0.105182	0.999947	FALSE	1068.53	-0.0562178	0.999981	FALSE	12.4383	-0.136474	NA	FALSE	341.098	0.172606	0.977409	FALSE
ENSG00000001084	GCLC	chr6:53362138-53481768	chr6:53479268-53484268	3970.96	-0.113243	0.873371	FALSE	2535.14	0.109098	0.758507	FALSE	2450.72	0.0582094	0.955602	FALSE	478.841	0.201153	0.763924	FALSE	1922.57	0.0169528	0.93292	FALSE	18.9865	-0.316625	0.727156	FALSE	136.178	0.915458	0.0425322	FALSE	407.084	0.377824	0.999947	FALSE	2864.76	-0.111915	0.999981	FALSE	12.1413	-0.196486	NA	FALSE	181.537	-0.360974	0.912614	FALSE
ENSG00000001167	NFYA	chr6:41040683-41067715	chr6:41038183-41043183	2080.49	0.30516	0.131535	FALSE	2296.38	-0.0466781	0.83603	FALSE	3519.44	0.298923	0.461271	FALSE	37.0816	0.250913	0.772416	FALSE	1112.84	0.392674	0.0107086	FALSE	5.42022	0.217161	NA	FALSE	583.785	-0.165557	0.710191	FALSE	65.6468	0.0936361	0.999947	FALSE	1727.76	-0.115604	0.999981	FALSE	18.787	-0.220535	NA	FALSE	899.595	0.0938541	0.986935	FALSE
ENSG00000001460	STPG1	chr1:24683488-24743424	chr1:24740924-24745924	803.47	-0.385087	0.233315	FALSE	1031.19	0.0482855	0.900151	FALSE	2817.82	-0.0982606	0.911971	FALSE	108.522	0.119786	0.881236	FALSE	1549.27	0.273732	0.0299452	FALSE	7.19103	1.10213	NA	FALSE	207.152	-0.373862	0.386459	FALSE	125.42	-0.0892454	0.999947	FALSE	2522.93	-0.130384	0.999981	FALSE	12.3477	-0.345963	NA	FALSE	277.766	-0.377638	0.851963	FALSE
ENSG00000001461	NIPAL3	chr1:24742283-24799466	chr1:24739783-24744783	5770.69	-1.27067	0.00027131	TRUE	7610.52	-0.0750983	0.855766	FALSE	12330.2	-0.153117	0.757064	FALSE	78.232	0.508251	0.504788	FALSE	1847.22	0.111248	0.47648	FALSE	6.43881	0.99294	NA	FALSE	370.033	-0.312506	0.433882	FALSE	95.714	0.120038	0.999947	FALSE	2540.58	-0.216056	0.999981	FALSE	16.6218	-0.511971	NA	FALSE	423.029	-0.112399	0.986935	FALSE
ENSG00000001497	LAS1L	chrX:64732461-64754655	chrX:64752155-64757155	2547.65	-0.0571243	0.849661	FALSE	2634.12	0.246225	0.0245346	FALSE	2672.6	0.2311	0.320366	FALSE	14.1748	0.579548	0.533355	FALSE	480.58	0.0764112	0.691166	FALSE	5.22818	1.03125	NA	FALSE	121.278	-0.240928	0.656618	FALSE	14.1928	0.0259906	0.999947	FALSE	547.291	-0.157103	0.999981	FALSE	6.04242	0.177967	NA	FALSE	72.1971	-0.0950534	0.986935	FALSE
ENSG00000001561	ENPP4	chr6:46097729-46114436	chr6:46095229-46100229	258.691	-2.11384	0.00362806	TRUE	51.1041	-0.59287	0.0672569	FALSE	850.038	0.573691	0.119209	FALSE	1013.97	-0.56188	0.465032	FALSE	31.5999	-0.432905	0.167202	FALSE	264.344	-0.268293	0.718991	FALSE	13.8886	0.133275	NA	FALSE	323.25	-0.113859	0.999947	FALSE	55.0845	-0.0912504	0.999981	FALSE	147.911	-0.344615	0.999877	FALSE	9.05301	0.0925586	NA	FALSE
ENSG00000001617	SEMA3F	chr3:50192477-50226508	chr3:50189977-50194977	1577.55	0.022438	0.949223	FALSE	1004.49	0.256928	0.168929	FALSE	5941.22	0.412189	0.574872	FALSE	71.0537	-0.256395	0.736981	FALSE	850.914	0.172605	0.256893	FALSE	53.9229	0.305657	0.631731	FALSE	139.276	0.572318	0.213057	FALSE	132.266	-0.397891	0.999947	FALSE	866.185	0.087462	0.999981	FALSE	76.8106	-0.490519	0.999877	FALSE	164.07	0.381038	0.899695	FALSE
ENSG00000001626	CFTR	chr7:117105837-117356025	chr7:117103337-117108337	5.86956	0.877809	0.241802	FALSE	4.51993	-1.96813	0.03636	FALSE	26.3483	0.579531	0.67314	FALSE	11648.6	-0.285814	0.629774	FALSE	530.744	-0.342545	0.290177	FALSE	339.443	-0.163167	0.786695	FALSE	6.38904	-0.0863646	NA	FALSE	2848.79	0.113883	0.999947	FALSE	1577.3	-0.188401	0.999981	FALSE	103.432	0.0633101	0.999877	FALSE	2.19188	0.106743	NA	FALSE
ENSG00000001629	ANKIB1	chr7:91875547-92030698	chr7:91873047-91878047	9974.81	-0.295884	0.0240791	FALSE	8868.03	0.0320797	0.703986	FALSE	15420.5	-0.0801146	0.866952	FALSE	217.275	0.528525	0.484058	FALSE	4097.41	0.202489	0.0979044	FALSE	6.37962	1.06292	NA	FALSE	293.913	-0.387532	0.345659	FALSE	303.756	0.412945	0.999947	FALSE	7135.86	0.039935	0.999981	FALSE	18.273	0.0458951	NA	FALSE	433.809	0.0984818	0.986935	FALSE
ENSG00000001630	CYP51A1	chr7:91741464-91772266	chr7:91769766-91774766	16320.8	-0.0968862	0.847046	FALSE	18139.8	0.271324	0.61938	FALSE	12538.5	0.0431034	0.969727	FALSE	75.3225	0.643787	0.39867	FALSE	825.812	0.187668	0.191527	FALSE	43.8848	0.768104	0.158994	FALSE	8.22302	0.442084	NA	FALSE	90.8164	-0.074046	0.999947	FALSE	1533.93	0.0298402	0.999981	FALSE	45.5227	-0.430269	0.999877	FALSE	5.46079	0.316451	NA	FALSE
ENSG00000001631	KRIT1	chr7:91828282-91875480	chr7:91872980-91877980	3402.3	0.0550483	0.67712	FALSE	3021.66	-0.0140234	0.90869	FALSE	4068.42	0.0796149	0.852056	FALSE	65.3166	0.878326	0.231101	FALSE	1817.08	0.238202	0.0761831	FALSE	6.18568	1.01084	NA	FALSE	294.271	-0.387912	0.344428	FALSE	92.2803	0.180836	0.999947	FALSE	3063.33	0.044409	0.999981	FALSE	17.6515	0.0475814	NA	FALSE	433.44	0.0982895	0.986935	FALSE
ENSG00000002016	RAD52	chr12:1021242-1099219	chr12:1096719-1101719	1098.83	0.5378	0.000108987	FALSE	1130.18	0.720351	0.000213	FALSE	840.738	0.0081959	0.988943	FALSE	246.576	-0.0897101	0.89805	FALSE	1759.51	0.19239	0.143412	FALSE	10.9652	0.455931	NA	FALSE	472.62	0.00251213	0.995973	FALSE	397.433	0.284866	0.999947	FALSE	3998.02	0.486707	0.935071	FALSE	38.6658	0.224441	0.999877	FALSE	991.64	0.673928	0.25936	FALSE
ENSG00000002079	MYH16	chr7:98836416-98908753	chr7:98833916-98838916	113.465	4.6784	2.55671e-06	TRUE	352.572	-2.49722	1.17875e-07	TRUE	144.418	1.33821	0.00301169	TRUE	837.03	-1.19243	0.000381077	TRUE	685.454	0.352014	0.0379412	FALSE	119.156	-0.694686	0.129795	FALSE	13.3667	0.33051	NA	FALSE	269.61	-0.216466	0.999947	FALSE	1594.8	-0.0562008	0.999981	FALSE	32.0616	0.0634942	0.999877	FALSE	6.15836	0.0503989	NA	FALSE
ENSG00000002330	BAD	chr11:64037301-64052176	chr11:64049676-64054676	2443.59	-0.583143	0.0452512	FALSE	3147.28	-0.0605497	0.450983	FALSE	1308.27	-0.162651	0.837252	FALSE	16.9555	0.878371	0.360439	FALSE	413.11	0.270189	0.147252	FALSE	7.47134	0.36932	NA	FALSE	482.006	-0.0224263	0.963694	FALSE	25.6448	-0.387538	0.999947	FALSE	710.302	-0.0832689	0.999981	FALSE	17.6483	-0.140318	NA	FALSE	765.367	0.0487212	0.989737	FALSE
ENSG00000002549	LAP3	chr4:17578814-17609595	chr4:17576314-17581314	5524.46	0.133247	0.700468	FALSE	7305.52	-0.426096	0.1878	FALSE	3242.74	0.264256	0.242315	FALSE	35.4774	0.129149	0.896409	FALSE	1124.82	0.217377	0.0926399	FALSE	12.4375	0.515218	NA	FALSE	282.67	0.0242892	0.968561	FALSE	46.4356	0.00374266	0.999947	FALSE	1864.49	-0.157518	0.999981	FALSE	12.6783	0.164262	NA	FALSE	397.008	0.421008	0.732984	FALSE
ENSG00000002586	CD99	chrX:2609219-2659350	chrX:2606719-2611719	16356.4	-0.310367	0.449353	FALSE	7454.02	-0.655582	0.0928348	FALSE	19562.1	-0.475586	0.369035	FALSE	0	NA	NA	FALSE	0	NA	NA	FALSE	0	NA	NA	FALSE	0	NA	NA	FALSE	0	NA	NA	FALSE	0	NA	NA	FALSE	0	NA	NA	FALSE	0	NA	NA	FALSE
ENSG00000002587	HS3ST1	chr4:11394773-11431389	chr4:11428889-11433889	63.4685	0.302574	0.558179	FALSE	53.712	-1.22414	1.32915e-05	TRUE	461.4	-0.817674	0.0230723	FALSE	218.159	-0.284102	0.622197	FALSE	434.928	-0.00451178	0.984748	FALSE	82.2531	-0.265284	0.652063	FALSE	37.2467	0.295278	0.667905	FALSE	162.108	0.292547	0.999947	FALSE	755.27	-0.215012	0.999981	FALSE	54.5912	-0.24036	0.999877	FALSE	75.0692	0.200453	0.977409	FALSE
ENSG00000002726	AOC1	chr7:150521714-150558592	chr7:150519214-150524214	5.41415	0.201867	0.909216	FALSE	4.86367	-2.04295	0.118952	FALSE	26.2364	1.49846	0.409403	FALSE	2665.15	0.223219	0.658991	FALSE	86.0507	-0.407195	0.191361	FALSE	314.218	0.207656	0.664934	FALSE	18.1332	-0.213264	0.777188	FALSE	1186.13	-0.366011	0.999947	FALSE	164.215	-0.647286	0.403942	FALSE	115.817	-0.0692904	0.999877	FALSE	22.1809	-0.25106	0.977023	FALSE
ENSG00000002745	WNT16	chr7:120965420-120981158	chr7:120962920-120967920	14.9048	2.42908	0.000306	FALSE	11.1316	-0.0984328	0.902282	FALSE	20.9604	1.20745	0.244444	FALSE	305.101	-0.570414	0.480467	FALSE	163.138	0.280702	0.296543	FALSE	39.0763	-0.219142	0.78978	FALSE	20.7244	-0.19101	0.797984	FALSE	193.205	-0.0770204	0.999947	FALSE	374.216	0.146951	0.999981	FALSE	34.4647	0.0645081	0.999877	FALSE	8.43679	0.173871	NA	FALSE
ENSG00000002746	HECW1	chr7:43152197-43605600	chr7:43149697-43154697	265.686	-1.48487	1.1918e-07	TRUE	948.725	1.05118	0.0095871	TRUE	515.647	-0.589792	0.179054	FALSE	9183.01	2.43153	5.94444e-17	TRUE	4573.86	-0.744637	8.88174e-05	TRUE	439.027	2.39723	6.46078e-08	TRUE	35.516	-1.32642	0.00594886	TRUE	1960.55	0.342867	0.999947	FALSE	14490.9	0.288466	0.999981	FALSE	137.573	-0.559654	0.987064	FALSE	25.6473	0.865058	0.140169	FALSE
ENSG00000002822	MAD1L1	chr7:1855428-2272878	chr7:2270378-2275378	2783.28	-0.134193	0.735921	FALSE	6822.39	1.08825	1.12394e-09	TRUE	1515.01	0.189549	0.677534	FALSE	736.111	0.135326	0.819011	FALSE	9782.84	-0.218993	0.19541	FALSE	8.26312	0.406004	NA	FALSE	169.211	-0.0614324	0.906253	FALSE	997.128	0.508783	0.999947	FALSE	19323.6	0.746553	0.177308	FALSE	17.3462	0.000342918	NA	FALSE	424.877	0.899142	0.0451756	FALSE
ENSG00000002834	LASP1	chr17:37026111-37078023	chr17:37023611-37028611	30960.8	-0.838476	1.65255e-08	FALSE	27362.8	-0.118135	0.278193	FALSE	88836	-0.458148	0.0113762	FALSE	72.6115	0.419866	0.607703	FALSE	2465.81	0.238226	0.0470327	FALSE	10.1348	0.415912	NA	FALSE	361.645	-0.66736	0.03578	FALSE	97.2233	-0.24749	0.999947	FALSE	3928.9	-0.0923043	0.999981	FALSE	16.7055	-0.370329	NA	FALSE	521.645	0.171598	0.977409	FALSE
ENSG00000002919	SNX11	chr17:46180718-46200436	chr17:46178218-46183218	1439.38	-0.855947	2.40007e-05	FALSE	1816.65	0.00906318	0.962922	FALSE	1453.18	0.139803	0.745375	FALSE	37.0324	0.591309	0.475412	FALSE	486.91	0.138353	0.43343	FALSE	18.4073	0.918829	0.220234	FALSE	191.223	-0.927694	0.00608856	FALSE	31.1905	0.158718	0.999947	FALSE	663.574	-0.0530136	0.999981	FALSE	14.9967	0.0836517	NA	FALSE	324.705	0.21287	0.97614	FALSE
ENSG00000002933	TMEM176A	chr7:150497490-150502208	chr7:150494990-150499990	2.98657	2.15923	0.0837076	FALSE	2.56706	-4.67245	0.00362926	FALSE	11.8094	0.794356	0.827598	FALSE	477.536	0.34363	0.500877	FALSE	12.898	-0.232426	NA	FALSE	644.346	0.286145	0.497799	FALSE	18.4816	0.115026	0.886712	FALSE	288.257	-0.550559	0.999947	FALSE	14.8162	-0.102352	NA	FALSE	439.964	-0.486074	0.999877	FALSE	7.9281	0.045886	NA	FALSE
ENSG00000003056	M6PR	chr12:9092958-9102551	chr12:9100051-9105051	11902.9	0.121244	0.638063	FALSE	15418.6	0.538522	0.00282413	FALSE	14559.2	-0.0267466	0.974683	FALSE	10.4176	0.545692	0.582466	FALSE	330.668	0.319075	0.0772544	FALSE	16.5333	-0.771933	0.374287	FALSE	335.276	-0.00416408	0.994163	FALSE	25.3336	0.249777	0.999947	FALSE	663.036	0.384539	0.999981	FALSE	28.2476	0.0388835	0.999877	FALSE	406.221	0.540994	0.62663	FALSE
ENSG00000003096	KLHL13	chrX:117031775-117251303	chrX:117248803-117253803	1616.95	0.174596	0.619362	FALSE	1477.64	-0.240591	0.441165	FALSE	813.114	-0.91907	0.00769558	FALSE	283.735	0.0497556	0.941078	FALSE	1341.98	0.0475434	0.776387	FALSE	9.76054	0.755	NA	FALSE	89.9606	-0.27371	0.611665	FALSE	350.312	0.276809	0.999947	FALSE	1847.63	-0.131711	0.999981	FALSE	10.8232	-0.18308	NA	FALSE	140.336	0.0237396	0.996074	FALSE
ENSG00000003137	CYP26B1	chr2:72356366-72375167	chr2:72372667-72377667	993.499	0.209975	0.588416	FALSE	10.8811	0.0507184	0.971149	FALSE	1818.73	0.639538	0.139078	FALSE	143.823	0.252929	0.684885	FALSE	352.329	-0.109993	0.666623	FALSE	65.7104	-0.16653	0.83402	FALSE	53.5893	-0.575872	0.273809	FALSE	179.362	0.309024	0.999947	FALSE	315.965	0.0616804	0.999981	FALSE	113.602	0.367356	0.999877	FALSE	10.9356	0.270856	NA	FALSE
ENSG00000003147	ICA1	chr7:8152813-8302317	chr7:8299817-8304817	126.459	1.53938	9.1937e-07	TRUE	185.172	5.22156	5.15285e-08	TRUE	62.9824	1.03889	0.21509	FALSE	2650.85	-0.330811	0.531774	FALSE	1153.83	0.0268283	0.892375	FALSE	462.675	-0.0317051	0.955369	FALSE	70.2758	0.0380598	0.960281	FALSE	2156.36	0.0339548	0.999947	FALSE	3162.43	1.12462	0.000826209	TRUE	404.764	-0.21413	0.999877	FALSE	193.935	0.734826	0.0761633	FALSE
ENSG00000003249	DBNDD1	chr16:90071272-90086536	chr16:90084036-90089036	158.806	-1.51448	0.00627687	TRUE	23.2428	1.03498	0.103545	FALSE	87.6499	1.04768	0.125432	FALSE	182.517	1.33616	0.000508712	TRUE	106.714	-0.54354	0.068565	FALSE	36.6962	1.41033	0.00785226	TRUE	146.241	-0.387364	0.335409	FALSE	163.166	-0.239699	0.999947	FALSE	148.201	0.274571	0.999981	FALSE	62.5653	-0.503366	0.999877	FALSE	138.8	0.839512	0.131011	FALSE
ENSG00000003393	ALS2	chr2:202565276-202645912	chr2:202643412-202648412	5801.4	-0.573282	0.0183288	FALSE	7495.86	-0.429088	6.30755e-08	FALSE	6613.46	-0.737769	1.32095e-05	FALSE	111.154	0.55731	0.481226	FALSE	2883.07	0.0256298	0.863019	FALSE	23.1847	0.729706	0.305646	FALSE	401.659	-0.0148413	0.977219	FALSE	164.02	0.227035	0.999947	FALSE	5729.15	-0.11351	0.999981	FALSE	17.8274	-0.405952	NA	FALSE	425.815	-0.0163594	0.997619	FALSE
ENSG00000003400	CASP10	chr2:202047603-202094129	chr2:202045103-202050103	878.743	0.450094	0.00112733	FALSE	804.181	-0.533152	1.19579e-05	FALSE	812.782	-0.337687	0.634918	FALSE	151.192	-0.306403	0.590075	FALSE	905.832	0.164326	0.297476	FALSE	14.9392	0.093358	0.926372	FALSE	120.515	0.0853841	0.894472	FALSE	121.563	0.147275	0.999947	FALSE	1738.4	-0.0948894	0.999981	FALSE	12.0215	-0.120498	NA	FALSE	107.012	-0.0929914	0.986935	FALSE
ENSG00000003402	CFLAR	chr2:201980826-202041410	chr2:201978326-201983326	4580.96	-0.161698	0.459172	FALSE	4310.61	-0.291877	0.00529554	FALSE	3895.54	0.0425757	0.963271	FALSE	106.677	0.541903	0.425717	FALSE	1666.28	0.164622	0.174683	FALSE	7.07005	1.06648	NA	FALSE	684.998	-0.498791	0.181259	FALSE	134.259	-0.179347	0.999947	FALSE	2908.6	-0.102994	0.999981	FALSE	21.6053	-0.450434	NA	FALSE	907.025	-0.020378	0.996074	FALSE
ENSG00000003436	TFPI	chr2:188328956-188430487	chr2:188427987-188432987	15516.7	0.758458	0.022901	FALSE	6243.79	0.455555	0.228306	FALSE	9617.7	0.335092	0.520893	FALSE	140.811	0.538818	0.476957	FALSE	2461.27	0.362737	0.000608432	FALSE	16.333	-0.0804063	0.937148	FALSE	24.0476	0.643523	0.25604	FALSE	244.954	-0.035045	0.999947	FALSE	4262.73	0.298348	0.999981	FALSE	24.1682	-0.460561	0.999877	FALSE	10.7377	0.176448	NA	FALSE
ENSG00000003509	NDUFAF7	chr2:37458773-37480546	chr2:37456273-37461273	1634.93	0.237028	0.0201715	FALSE	1544.68	0.107028	0.233824	FALSE	921.895	-0.00673328	0.991687	FALSE	26.013	0.49937	0.596112	FALSE	790.232	0.266066	0.0961401	FALSE	8.49349	0.22548	NA	FALSE	267.183	-0.107447	0.840755	FALSE	42.4811	0.240618	0.999947	FALSE	1361.89	0.0744719	0.999981	FALSE	15.6985	0.0149259	NA	FALSE	339.523	0.147356	0.982148	FALSE
ENSG00000003756	RBM5	chr3:50126340-50156454	chr3:50123840-50128840	9430.14	-0.00804825	0.981625	FALSE	5885.87	0.177863	0.419525	FALSE	3801.61	-0.0572166	0.93245	FALSE	39.5923	0.813693	0.344032	FALSE	1545.95	0.353497	0.00383533	FALSE	11.0092	0.512853	NA	FALSE	259.395	-0.580761	0.17454	FALSE	37.7854	-0.00954112	0.999947	FALSE	1861.44	-0.0497046	0.999981	FALSE	11.0493	0.026551	NA	FALSE	218.062	0.221419	0.975552	FALSE
ENSG00000003987	MTMR7	chr8:17155538-17271037	chr8:17268537-17273537	187.35	0.25963	0.333776	FALSE	136.64	-0.35581	0.0751323	FALSE	310.723	0.292097	0.576361	FALSE	2011.63	0.679343	0.183036	FALSE	1247.71	-0.0719774	0.654205	FALSE	280.711	0.667353	0.202666	FALSE	11.9889	0.116846	NA	FALSE	1205.58	-0.367604	0.999947	FALSE	1883.26	0.0597951	0.999981	FALSE	180.024	-0.779083	0.64949	FALSE	4.72898	0.0295651	NA	FALSE
ENSG00000003989	SLC7A2	chr8:17354596-17428082	chr8:17352096-17357096	571.428	0.85958	0.0337513	FALSE	290.896	0.04357	0.973341	FALSE	1012.15	-0.918121	0.77037	FALSE	781.943	0.102868	0.858555	FALSE	736.786	-0.000893179	0.997514	FALSE	56.5485	1.25476	0.0101918	TRUE	53.4733	0.0729748	0.907603	FALSE	1331.73	-0.453517	0.999947	FALSE	806.632	0.290816	0.999981	FALSE	168.742	-0.566202	0.985895	FALSE	48.1755	0.302553	0.958525	FALSE
ENSG00000004059	ARF5	chr7:127228398-127231759	chr7:127225898-127230898	5196.85	-0.281969	0.355354	FALSE	4826.33	-0.212166	0.226046	FALSE	3837.74	0.150272	0.66153	FALSE	4.52667	0.164895	NA	FALSE	108.49	0.147655	0.598673	FALSE	10.1554	0.667602	NA	FALSE	282.171	-0.322919	0.414807	FALSE	7.41399	0.0562834	NA	FALSE	135.512	-0.151269	0.999981	FALSE	14.421	-0.0583498	NA	FALSE	353.464	0.00488177	0.999209	FALSE
ENSG00000004139	SARM1	chr17:26691377-26728065	chr17:26688877-26693877	1920.27	0.315682	0.10751	FALSE	1488.16	0.186897	0.644541	FALSE	1615.25	0.373935	0.635452	FALSE	393.719	-1.24327	0.0711527	FALSE	757.278	0.162605	0.376936	FALSE	5.44617	0.599724	NA	FALSE	18.5388	0.622013	0.327259	FALSE	375.32	0.0073047	0.999947	FALSE	889.933	-0.138527	0.999981	FALSE	7.37785	-0.200109	NA	FALSE	5.92532	0.139184	NA	FALSE
ENSG00000004142	POLDIP2	chr17:26673658-26684545	chr17:26682045-26687045	8081.06	-0.0757581	0.809927	FALSE	8036.42	0.275587	0.000199144	FALSE	14324.9	0.246169	0.3393	FALSE	15.3704	0.616656	0.518064	FALSE	479.647	0.298472	0.0724977	FALSE	7.18073	0.30586	NA	FALSE	251.095	-0.275707	0.554826	FALSE	24.0316	-0.258195	0.999947	FALSE	757.609	-0.126741	0.999981	FALSE	10.924	-0.137307	NA	FALSE	403.902	0.10029	0.986935	FALSE
ENSG00000004399	PLXND1	chr3:129274017-129325661	chr3:129323161-129328161	6591.76	-0.318803	0.613417	FALSE	2431.61	-0.402703	0.18085	FALSE	16829.1	-0.624829	0.00136795	FALSE	74.4169	0.723025	0.33663	FALSE	2028.15	-0.12917	0.423904	FALSE	15.0819	1.95518	0.00328448	FALSE	219.115	-0.935751	0.00852695	FALSE	166.568	0.0620822	0.999947	FALSE	1991	-0.204007	0.999981	FALSE	67.6447	-0.00325652	0.999877	FALSE	254.821	-0.192273	0.977409	FALSE
ENSG00000004455	AK2	chr1:33473584-33546597	chr1:33544097-33549097	8487.49	0.0761918	0.81023	FALSE	7181.53	0.0504161	0.573256	FALSE	10001.4	0.388382	0.221543	FALSE	453.695	0.644171	0.134734	FALSE	1415.42	0.108145	0.434485	FALSE	24.7642	-0.683095	0.315581	FALSE	122.227	0.205169	0.695002	FALSE	321.707	0.087139	0.999947	FALSE	2061.27	-0.108381	0.999981	FALSE	20.2922	-0.404586	NA	FALSE	114.329	0.460588	0.78308	FALSE
ENSG00000004468	CD38	chr4:15779897-15854853	chr4:15777397-15782397	85.244	-0.864953	0.0346935	FALSE	50.1167	0.423128	0.421644	FALSE	249.268	-0.85294	0.331971	FALSE	3640.26	0.961203	0.0034726	FALSE	260.963	-0.804553	0.000223854	TRUE	180.497	0.484833	0.303529	FALSE	34.0824	0.799605	0.161857	FALSE	1720.23	0.0683848	0.999947	FALSE	613.171	0.0751677	0.999981	FALSE	129.092	-0.304295	0.999877	FALSE	26.6594	-0.352423	0.925602	FALSE
ENSG00000004478	FKBP4	chr12:2904118-2914576	chr12:2901618-2906618	7251.64	-0.702991	0.00655613	FALSE	7412.38	0.858653	0.00737821	FALSE	8433.16	0.269186	0.259971	FALSE	19.6809	0.439238	0.619476	FALSE	444.156	0.20211	0.251137	FALSE	36.4392	0.817781	0.172378	FALSE	168.604	-0.583294	0.130711	FALSE	38.8951	0.608109	0.999947	FALSE	826.781	0.460826	0.999981	FALSE	58.1909	0.701267	0.796385	FALSE	388.348	0.80581	0.126858	FALSE
ENSG00000004487	KDM1A	chr1:23345940-23410182	chr1:23343440-23348440	8111.21	-0.149326	0.363344	FALSE	7280.12	0.144976	0.282184	FALSE	8677.53	-0.486813	0.361898	FALSE	106.399	0.583373	0.455714	FALSE	2071.97	0.275073	0.0283136	FALSE	8.38073	0.0338194	NA	FALSE	279.24	-0.368592	0.398093	FALSE	122.464	0.19876	0.999947	FALSE	3198.67	0.00382009	0.999981	FALSE	11.7886	-0.201258	NA	FALSE	399.79	0.29502	0.928424	FALSE
ENSG00000004534	RBM6	chr3:49977439-50137478	chr3:49974939-49979939	9317.42	0.217946	0.383484	FALSE	6909.96	0.23627	0.477387	FALSE	3595.44	-0.0646581	0.902143	FALSE	188.204	0.725873	0.326766	FALSE	4668.27	0.215385	0.0788983	FALSE	5.59287	0.610708	NA	FALSE	216.758	-0.369363	0.375285	FALSE	196.514	0.305718	0.999947	FALSE	5677.67	0.0255633	0.999981	FALSE	9.11796	0.231827	NA	FALSE	257.959	0.277474	0.945865	FALSE
ENSG00000004660	CAMKK1	chr17:3763608-3798185	chr17:3795685-3800685	681.467	0.514827	0.0681134	FALSE	408.918	0.538065	0.28397	FALSE	443.614	0.190003	0.815561	FALSE	63.2147	0.141579	0.863843	FALSE	892.726	0.198686	0.265857	FALSE	14.7956	0.28032	0.760253	FALSE	121.092	-0.179508	0.723802	FALSE	91.8294	-0.561087	0.999947	FALSE	1091.82	0.175505	0.999981	FALSE	16.556	-0.232921	NA	FALSE	209.462	0.761823	0.271515	FALSE
ENSG00000004700	RECQL	chr12:21621844-21654603	chr12:21652103-21657103	9552.97	0.45882	0.0451318	FALSE	10136.3	0.103328	0.762006	FALSE	5715.38	0.173673	0.586286	FALSE	39.0473	0.742706	0.372294	FALSE	1264.61	0.162353	0.217023	FALSE	5.49473	0.138291	NA	FALSE	268.707	-0.238202	0.593379	FALSE	73.2125	0.444093	0.999947	FALSE	2517.69	0.382074	0.999981	FALSE	19.1304	0.0466788	NA	FALSE	411.729	0.381448	0.899695	FALSE
ENSG00000004766	CCDC132	chr7:92861652-92988338	chr7:92859152-92864152	2513.31	-0.0941086	0.714524	FALSE	2333.71	0.0135379	0.926107	FALSE	1830.93	0.163432	0.524636	FALSE	233.074	-0.00717483	0.993368	FALSE	2630.97	0.112649	0.408008	FALSE	80.2345	-0.355371	0.524041	FALSE	60.1573	0.0144111	0.981181	FALSE	290.206	0.295469	0.999947	FALSE	4920.19	0.0287882	0.999981	FALSE	16.6754	0.312674	NA	FALSE	61.6873	0.147565	0.986935	FALSE
ENSG00000004776	HSPB6	chr19:36245468-36248980	chr19:36246480-36251480	17.6654	0.838938	0.0831645	FALSE	19.2249	0.217024	0.80196	FALSE	14.6114	-0.0734313	0.974905	FALSE	6.01572	0.0980732	0.930256	FALSE	125.276	0.00544411	0.988145	FALSE	7.00438	0.0614604	NA	FALSE	395.971	-0.481381	0.29305	FALSE	7.02197	0.0663942	NA	FALSE	174.318	0.0871253	0.999981	FALSE	12.3132	0.0239941	NA	FALSE	280.029	0.165015	0.977409	FALSE
ENSG00000004777	ARHGAP33	chr19:36265433-36279724	chr19:36262933-36267933	219.705	0.273292	0.540479	FALSE	174.438	0.15236	0.701569	FALSE	616.399	-0.101115	0.955228	FALSE	23.2625	-0.308995	0.740631	FALSE	474.911	-0.0461219	0.841438	FALSE	21.8793	-0.067319	0.946528	FALSE	77.667	-0.294771	0.57131	FALSE	23.5136	-0.0976371	0.999947	FALSE	359.849	0.106672	0.999981	FALSE	10.543	0.0773014	NA	FALSE	106.328	0.398734	0.89577	FALSE
ENSG00000004779	NDUFAB1	chr16:23592322-23607677	chr16:23605177-23610177	3101.81	-0.10279	0.824775	FALSE	2546.27	0.297381	0.0648401	FALSE	1486.74	0.315027	0.642764	FALSE	16.414	0.633784	0.519785	FALSE	548.987	0.182773	0.262988	FALSE	5.70164	0.36362	NA	FALSE	163.333	-0.194648	0.677262	FALSE	21.0492	-0.0657144	0.999947	FALSE	696.938	-0.198617	0.999981	FALSE	13.4844	-0.358161	NA	FALSE	180.582	0.258826	0.962567	FALSE
ENSG00000004799	PDK4	chr7:95212810-95225803	chr7:95223303-95228303	152.171	0.892646	0.101122	FALSE	62.6273	-0.39923	0.396626	FALSE	215.401	0.26101	0.784409	FALSE	181.711	-0.6711	0.394847	FALSE	170.488	0.30996	0.2395	FALSE	65.5422	-0.248781	0.752535	FALSE	101.563	0.201268	0.754356	FALSE	133.631	0.76492	0.898222	FALSE	278.997	-0.0802171	0.999981	FALSE	43.442	0.356793	0.999877	FALSE	113.247	-0.0111023	0.999209	FALSE
ENSG00000004809	SLC22A16	chr6:110745889-110797844	chr6:110795344-110800344	3.98357	0.66594	0.686842	FALSE	11.076	0.693016	0.572842	FALSE	2.68461	-0.238225	NA	FALSE	3047.39	0.327584	0.482529	FALSE	209.085	-0.176061	0.540242	FALSE	267.47	-0.274365	0.540465	FALSE	14.1191	0.313243	NA	FALSE	1819.6	-0.0583939	0.999947	FALSE	358.928	0.0631726	0.999981	FALSE	269.012	-0.605951	0.927966	FALSE	13.3141	0.440717	NA	FALSE
ENSG00000004838	ZMYND10	chr3:50378540-50384283	chr3:50381783-50386783	92.4652	1.2073	0.000601089	TRUE	68.017	1.0095	0.0374795	TRUE	20.3478	-0.437971	0.753129	FALSE	17.9036	0.690936	0.435534	FALSE	102.362	0.0402835	0.903215	FALSE	10.0533	0.267205	NA	FALSE	53.1699	0.577884	0.226148	FALSE	13.8739	-0.189567	0.999947	FALSE	125.299	0.22282	0.999981	FALSE	10.421	-0.177001	NA	FALSE	20.0477	0.370903	0.907883	FALSE
ENSG00000004846	ABCB5	chr7:20654829-20816658	chr7:20652329-20657329	270.931	-3.41425	0.00073006	TRUE	1565.28	-4.41714	4.72695e-22	TRUE	1290.73	-3.08397	4.29674e-10	TRUE	5935.58	0.416434	0.37417	FALSE	943.609	-0.244937	0.447292	FALSE	101.815	2.36192	2.28035e-07	TRUE	9.59262	0.159655	NA	FALSE	3058.33	1.05687	0.158256	FALSE	3530.41	-0.494782	0.914752	FALSE	78.2201	0.813138	0.632789	FALSE	11.8128	0.186155	NA	FALSE
ENSG00000004848	ARX	chrX:25021810-25034065	chrX:25031565-25036565	0.319656	0.651384	NA	FALSE	0.740132	3.14153	NA	FALSE	2.96781	0.289187	NA	FALSE	175.502	0.560891	0.256818	FALSE	48.1066	-0.190715	0.585654	FALSE	188.536	1.42444	4.23418e-05	TRUE	9.16572	-0.164991	NA	FALSE	243.883	-0.303119	0.999947	FALSE	75.3358	0.381195	0.999981	FALSE	247.477	-0.320606	0.999877	FALSE	6.04329	0.267893	NA	FALSE
ENSG00000004864	SLC25A13	chr7:95749531-95951459	chr7:95948959-95953959	3603.21	-0.878658	4.33109e-07	FALSE	2772.03	0.00922558	0.972309	FALSE	5787.65	-0.0409902	0.96414	FALSE	287.327	0.47368	0.529304	FALSE	5171.56	0.136331	0.186344	FALSE	23.4386	0.175631	0.844966	FALSE	281.479	-0.313906	0.43968	FALSE	323.024	0.383693	0.999947	FALSE	8008.45	-0.148937	0.999981	FALSE	21.151	0.000928984	NA	FALSE	424.737	0.164221	0.977409	FALSE
ENSG00000004866	ST7	chr7:116593291-116870157	chr7:116590791-116595791	1163.15	-0.390986	0.199642	FALSE	687.912	0.0414658	0.916484	FALSE	2342.67	-0.0806449	0.853144	FALSE	517.274	0.402648	0.578261	FALSE	5166.48	-0.00818494	0.953869	FALSE	9.48908	0.405371	NA	FALSE	381.04	-0.454743	0.363505	FALSE	610.865	0.218481	0.999947	FALSE	8113.23	0.00761459	0.999981	FALSE	15.2981	-0.525715	NA	FALSE	792.306	0.147628	0.977409	FALSE
ENSG00000004897	CDC27	chr17:45195068-45266788	chr17:45264288-45269288	10329.7	-0.315591	0.0516294	FALSE	8381.44	-0.0472689	0.824919	FALSE	14564.7	-0.0687079	0.827598	FALSE	91.237	0.533438	0.511344	FALSE	2725.22	0.25931	0.0208706	FALSE	7.44565	0.48015	NA	FALSE	289.485	-0.35232	0.5262	FALSE	133.993	0.286798	0.999947	FALSE	4754.26	-0.00921605	0.999981	FALSE	16.2622	-0.0745277	NA	FALSE	323.552	0.0788035	0.986935	FALSE
ENSG00000004939	SLC4A1	chr17:42325752-42345509	chr17:42343009-42348009	2.45695	0.160878	0.948661	FALSE	1.13297	-0.184857	0.96276	FALSE	2.0073	-4.60982	NA	FALSE	715.604	0.597467	0.167182	FALSE	100.788	-0.494387	0.0930232	FALSE	128.491	0.925822	0.0183111	FALSE	15.965	-0.0462616	NA	FALSE	353.612	-0.0849087	0.999947	FALSE	151.812	0.0905448	0.999981	FALSE	61.8692	-0.00361371	0.999877	FALSE	9.75728	0.15362	NA	FALSE
ENSG00000004948	CALCR	chr7:93053798-93204042	chr7:93201542-93206542	13.3765	-3.47232	1.05829e-05	FALSE	17.9101	-0.17103	0.890695	FALSE	265.772	3.56971	0.00976001	TRUE	12322.4	-0.181345	0.701855	FALSE	148.639	-0.0600719	0.879683	FALSE	698.323	0.0170051	0.975081	FALSE	13.1411	-0.238765	NA	FALSE	4115.25	0.45886	0.999947	FALSE	994.278	-0.125809	0.999981	FALSE	352.187	0.0612924	0.999877	FALSE	7.19164	0.124866	NA	FALSE
ENSG00000004961	HCCS	chrX:11129420-11141198	chrX:11126920-11131920	1543.87	-0.802407	0.000856316	FALSE	1939.13	0.227489	0.0567795	FALSE	2826.32	-0.118607	0.558614	FALSE	8.25725	0.363769	0.713401	FALSE	290.919	0.277157	0.14941	FALSE	4.65216	0.252908	NA	FALSE	163.109	-0.346294	0.499677	FALSE	11.5958	-0.0979562	0.999947	FALSE	463.347	-0.121786	0.999981	FALSE	7.43202	-0.19682	NA	FALSE	165.206	0.253334	0.96354	FALSE
ENSG00000004975	DVL2	chr17:7128659-7137864	chr17:7135364-7140364	6026.65	0.113823	0.593564	FALSE	6413.12	0.0227923	0.934614	FALSE	6009.8	-0.339377	0.321951	FALSE	10.3524	0.40139	0.682645	FALSE	410.894	0.278324	0.11826	FALSE	7.336	0.291168	NA	FALSE	297.523	-0.789243	0.00458139	FALSE	16.8374	-0.17921	0.999947	FALSE	643.784	-0.0246757	0.999981	FALSE	15.6267	-0.143812	NA	FALSE	376.866	0.121306	0.986935	FALSE
ENSG00000005001	PRSS22	chr16:2902727-2908171	chr16:2905671-2910671	11.5331	3.45928	0.000350735	FALSE	8.2909	0.0291625	0.985385	FALSE	23.6351	3.62842	0.00500965	FALSE	49.8562	0.0265672	0.975704	FALSE	23.1909	0.189881	NA	FALSE	66.0993	-1.10924	0.0287073	TRUE	29.8051	0.521312	0.398208	FALSE	49.5192	-0.243091	0.999947	FALSE	52.3068	0.279208	0.999981	FALSE	73.6311	-0.541189	0.999877	FALSE	31.1747	0.519854	0.725343	FALSE
ENSG00000005007	UPF1	chr19:18942746-18979045	chr19:18940246-18945246	8034.69	-0.322518	0.227421	FALSE	9830.45	-0.0448966	0.641329	FALSE	9754	-0.157302	0.609669	FALSE	42.4748	0.373398	0.684419	FALSE	1708.43	0.173532	0.166408	FALSE	19.8785	0.297804	0.735208	FALSE	238.02	-0.521728	0.286871	FALSE	63.8276	0.0506045	0.999947	FALSE	2335.85	-0.0150076	0.999981	FALSE	15.7927	0.0348439	NA	FALSE	425.681	0.215167	0.972714	FALSE
ENSG00000005020	SKAP2	chr7:26706680-27034858	chr7:27032358-27037358	10.0879	-1.26391	0.082771	FALSE	21.18	0.889391	0.446302	FALSE	70.7805	-1.80545	0.0189852	TRUE	18055.4	0.203861	0.661161	FALSE	1348.23	0.109574	0.414079	FALSE	83.0131	-0.403587	0.456378	FALSE	11.9678	0.563274	NA	FALSE	6597.8	0.565863	0.999947	FALSE	4766.8	0.652905	0.211386	FALSE	61.6073	0.767477	0.703407	FALSE	11.9476	-0.179883	NA	FALSE
ENSG00000005022	SLC25A5	chrX:118602362-118605282	chrX:118599862-118604862	11699.4	-0.0804093	0.847212	FALSE	11149.9	0.0838003	0.642945	FALSE	22279.9	0.205018	0.565749	FALSE	5.06521	0.734421	NA	FALSE	44.3173	0.292959	0.367749	FALSE	6.5302	1.05762	NA	FALSE	134.029	-0.100343	0.855273	FALSE	5.66912	-0.0228807	NA	FALSE	82.7153	-0.0866674	0.999981	FALSE	6.63448	-0.0662337	NA	FALSE	178.783	0.100342	0.986935	FALSE
ENSG00000005059	CCDC109B	chr4:110481360-110609874	chr4:110478860-110483860	106.332	0.0299598	0.949223	FALSE	1103.17	0.351944	0.107039	FALSE	568.706	0.226543	0.78601	FALSE	2585.87	0.630328	0.171263	FALSE	772.585	-0.260161	0.152014	FALSE	7.72388	0.393459	NA	FALSE	91.8436	0.0630259	0.917423	FALSE	368.258	0.226224	0.999947	FALSE	2083.78	0.288032	0.999981	FALSE	13.3092	-0.201091	NA	FALSE	295.454	0.68093	0.314816	FALSE
ENSG00000005073	HOXA11	chr7:27221128-27224842	chr7:27222342-27227342	3234.14	-0.25045	0.449591	FALSE	8038.02	1.21322	0.00958123	TRUE	3510.86	-0.616819	0.103585	FALSE	7.36775	0.0651799	0.954134	FALSE	93.0676	0.380198	0.14941	FALSE	8.10614	-0.231907	NA	FALSE	1029.13	-1.13994	1.23197e-05	TRUE	21.3254	-0.283357	0.999947	FALSE	342.843	0.55558	0.646413	FALSE	28.2241	-0.224512	0.999877	FALSE	1411.55	0.628569	0.203575	FALSE
ENSG00000005075	POLR2J	chr7:102113564-102119354	chr7:102116854-102121854	1522.17	-0.280332	0.507695	FALSE	1188.91	0.261204	0.0134436	FALSE	2534.28	0.241282	0.47865	FALSE	0.781817	0.197738	NA	FALSE	56.1739	-0.00509533	0.990848	FALSE	0.363563	0.196417	NA	FALSE	14.9983	-0.121332	NA	FALSE	1.15562	0.00455532	NA	FALSE	67.4295	-0.0664416	0.999981	FALSE	0.311135	0.021849	NA	FALSE	5.17833	-0.0424409	NA	FALSE
ENSG00000005100	DHX33	chr17:5344231-5372380	chr17:5369880-5374880	1806.59	0.277176	0.232951	FALSE	1742.48	0.191516	0.0155452	FALSE	5031.73	0.167301	0.687149	FALSE	31.9593	0.700611	0.437143	FALSE	1046.34	0.130395	0.343807	FALSE	6.16325	0.405154	NA	FALSE	122.846	-0.0557544	0.917897	FALSE	34.4506	0.145932	0.999947	FALSE	1221.18	-0.0442078	0.999981	FALSE	6.73792	0.050653	NA	FALSE	121.186	0.242418	0.975552	FALSE
ENSG00000005102	MEOX1	chr17:41717755-41739322	chr17:41736822-41741822	2.14054	-0.895205	0.568297	FALSE	0.931074	0.256803	NA	FALSE	0.939166	-0.167564	NA	FALSE	658.78	0.931259	0.0246924	FALSE	127.775	-0.716956	0.00200067	TRUE	123.052	0.912103	0.060576	FALSE	23.5833	-0.247938	0.722685	FALSE	429.475	0.275078	0.999947	FALSE	190.049	-0.16706	0.999981	FALSE	105.603	0.456544	0.999877	FALSE	11.4446	0.0607134	NA	FALSE
ENSG00000005108	THSD7A	chr7:11409983-11871824	chr7:11869324-11874324	212.581	1.6011	3.00716e-05	TRUE	147.456	1.03953	0.36934	FALSE	207.943	0.139	0.95412	FALSE	2450.46	-0.49638	0.358398	FALSE	3878.41	0.258049	0.0519341	FALSE	35.195	-0.961543	0.0831292	FALSE	38.3521	0.484133	0.3915	FALSE	2443.92	0.240229	0.999947	FALSE	6652.88	0.61555	0.488947	FALSE	60.4516	-0.833334	0.613306	FALSE	33.64	0.317396	0.941325	FALSE
ENSG00000005156	LIG3	chr17:33307512-33332083	chr17:33305012-33310012	2127.31	0.166832	0.397635	FALSE	1942.16	0.0613572	0.765986	FALSE	3065.95	0.138685	0.518584	FALSE	32.0934	0.0529967	0.954666	FALSE	941.571	0.210913	0.176291	FALSE	8.28112	0.10999	NA	FALSE	395.891	-0.191984	0.710748	FALSE	38.6555	0.06549	0.999947	FALSE	1127.88	-0.114759	0.999981	FALSE	16.1045	-0.275209	NA	FALSE	678.475	0.11395	0.986935	FALSE
ENSG00000005175	RPAP3	chr12:48057069-48099844	chr12:48097344-48102344	2500.08	-0.226667	0.170788	FALSE	2347.98	0.148859	0.0870596	FALSE	2978.1	0.0210451	0.967961	FALSE	64.3876	0.427102	0.61167	FALSE	1354.07	0.22192	0.108823	FALSE	10.577	-0.216209	NA	FALSE	222.449	-0.419246	0.340015	FALSE	74.7127	0.278971	0.999947	FALSE	2261.94	-0.0140359	0.999981	FALSE	12.2175	0.0335826	NA	FALSE	273.117	0.150859	0.981125	FALSE
ENSG00000005187	ACSM3	chr16:20621564-20808903	chr16:20619064-20624064	488.785	0.21779	0.444236	FALSE	447.184	0.0426605	0.863357	FALSE	808.852	-0.219919	0.634493	FALSE	4707.8	-0.906634	0.0095577	FALSE	1088.14	0.0756794	0.747034	FALSE	169.294	-3.28012	2.48938e-14	TRUE	13.432	-0.332036	NA	FALSE	1692.02	-0.256725	0.999947	FALSE	1982.09	-0.14171	0.999981	FALSE	85.3912	-1.39338	0.0347248	TRUE	6.02696	0.17488	NA	FALSE
ENSG00000005189	AC004381.6	chr16:20817750-20860987	chr16:20815250-20820250	812.822	0.370885	0.413298	FALSE	866.652	0.754332	1.09679e-11	FALSE	686.736	0.364811	0.280529	FALSE	60.1886	0.354501	0.66359	FALSE	1589.35	0.381824	0.000294626	FALSE	7.44486	0.494259	NA	FALSE	248.224	-0.123709	0.784046	FALSE	73.867	0.00136925	0.999947	FALSE	2105.34	0.103338	0.999981	FALSE	8.42238	-0.414026	NA	FALSE	377.035	0.163608	0.97822	FALSE
ENSG00000005194	CIAPIN1	chr16:57462080-57481440	chr16:57478940-57483940	3622.08	-0.563157	0.000635899	FALSE	3248.22	0.259984	0.0296483	FALSE	4394.88	0.0100387	0.99255	FALSE	22.1787	0.4586	0.620637	FALSE	694.775	0.211057	0.16731	FALSE	5.98698	0.517043	NA	FALSE	307.658	-0.323153	0.451731	FALSE	28.0566	0.216866	0.999947	FALSE	913.163	-0.086866	0.999981	FALSE	16.4459	-0.0790239	NA	FALSE	369.957	0.241272	0.963033	FALSE
ENSG00000005206	SPPL2B	chr19:2328613-2355099	chr19:2326113-2331113	3514.76	0.0324477	0.943537	FALSE	3004.14	0.175867	0.422005	FALSE	1406.57	-0.234574	0.636513	FALSE	30.3719	0.669484	0.456846	FALSE	820.429	-0.147676	0.465803	FALSE	8.58333	0.446981	NA	FALSE	256.394	-0.204143	0.628163	FALSE	43.9981	-0.252926	0.999947	FALSE	930.72	0.144718	0.999981	FALSE	12.4231	-0.154934	NA	FALSE	300.891	0.267701	0.953496	FALSE
ENSG00000005238	FAM214B	chr9:35104108-35116338	chr9:35113838-35118838	2844.96	-0.323147	0.280151	FALSE	1363.52	0.133119	0.534301	FALSE	6765.77	-0.0635666	0.926183	FALSE	15.1622	0.195624	0.849369	FALSE	381.508	0.211774	0.241272	FALSE	9.07037	0.0353509	NA	FALSE	372.637	-0.667849	0.058173	FALSE	23.3977	-0.380616	0.999947	FALSE	539.052	-0.156176	0.999981	FALSE	16.7985	-0.567322	NA	FALSE	253.775	-0.00140144	0.999773	FALSE
ENSG00000005243	COPZ2	chr17:46103532-46115392	chr17:46112892-46117892	2346.42	-0.367961	0.184409	FALSE	1487.15	0.0159799	0.970102	FALSE	784.72	-0.366228	0.53412	FALSE	15.6011	0.933782	0.28878	FALSE	286.687	0.139534	0.513875	FALSE	9.8445	1.01934	NA	FALSE	125.619	-1.05313	0.00346979	TRUE	26.8762	-0.316858	0.999947	FALSE	352.097	-0.0443301	0.999981	FALSE	18.0771	-0.404351	NA	FALSE	165.805	0.231842	0.977023	FALSE
ENSG00000005249	PRKAR2B	chr7:106685093-106802256	chr7:106682593-106687593	606.241	-1.84317	1.00576e-07	TRUE	365.402	0.390121	0.820334	FALSE	526.493	1.25082	0.0328377	TRUE	3386.36	1.23643	0.0285097	TRUE	833.326	-0.491145	0.00781536	FALSE	176.655	1.70286	0.000804156	TRUE	55.048	-0.551959	0.316305	FALSE	2090.09	0.344379	0.999947	FALSE	1245.04	-0.00836933	0.999981	FALSE	204.454	0.189959	0.999877	FALSE	50.5253	-0.310235	0.954346	FALSE
ENSG00000005302	MSL3	chrX:11776277-11793870	chrX:11773777-11778777	2029.39	0.294066	0.18269	FALSE	1837.04	-0.0632413	0.486116	FALSE	1805.47	-0.063054	0.858833	FALSE	8.53243	0.553389	0.579164	FALSE	362.032	0.247464	0.147586	FALSE	12.6286	-0.55573	NA	FALSE	297.804	0.150136	0.786729	FALSE	20.3855	-0.186487	0.999947	FALSE	565.71	-0.146064	0.999981	FALSE	15.5892	-0.0432541	NA	FALSE	362.743	0.0029835	0.999759	FALSE
ENSG00000005339	CREBBP	chr16:3775054-3930727	chr16:3928227-3933227	4038.46	0.063331	0.917712	FALSE	1899.28	-0.102336	0.573202	FALSE	20317.5	-0.359197	0.104752	FALSE	214.812	0.64303	0.41029	FALSE	5254.65	0.1531	0.176737	FALSE	11.97	0.567114	NA	FALSE	412.374	-0.581213	0.207347	FALSE	283.315	0.139069	0.999947	FALSE	7861.36	-0.100762	0.999981	FALSE	24.1909	-0.578592	0.963858	FALSE	864.065	0.101392	0.986935	FALSE
ENSG00000005379	BZRAP1	chr17:56378591-56406152	chr17:56403652-56408652	606.318	0.169374	0.712586	FALSE	431.274	-0.897858	0.348478	FALSE	184.985	-0.608589	0.512382	FALSE	470.062	0.0924004	0.874431	FALSE	373.899	-0.0672111	0.769344	FALSE	27.2366	0.440648	0.564142	FALSE	60.1343	1.47867	0.000159123	TRUE	588.388	0.344811	0.999947	FALSE	320.057	-0.502011	0.843963	FALSE	61.0644	0.674839	0.845453	FALSE	20.4175	-0.282311	0.963491	FALSE
ENSG00000005381	MPO	chr17:56347216-56358296	chr17:56355796-56360796	4.9075	1.50938	0.06634	FALSE	0.680871	-0.599232	NA	FALSE	4.78747	-0.930898	NA	FALSE	828.039	0.23364	0.625581	FALSE	29.5391	-0.25653	0.450211	FALSE	410.276	0.269459	0.547317	FALSE	20.3336	0.321559	0.656834	FALSE	526.084	-0.108426	0.999947	FALSE	54.8416	-0.136011	0.999981	FALSE	251.314	-0.0526892	0.999877	FALSE	8.97379	-0.00876864	NA	FALSE
ENSG00000005421	PON1	chr7:94926987-95025673	chr7:95023173-95028173	3.56024	1.7153	0.159124	FALSE	32.2113	1.75187	0.0478931	FALSE	8.5167	-0.501869	0.884813	FALSE	857.159	0.367345	0.443426	FALSE	765.47	-0.0479237	0.821356	FALSE	62.164	-0.165782	0.816238	FALSE	18.4926	0.669114	0.27437	FALSE	601.044	-0.25304	0.999947	FALSE	1454.94	0.363514	0.999981	FALSE	44.2353	-0.251388	0.999877	FALSE	52.0952	0.379156	0.915505	FALSE
ENSG00000005436	GCFC2	chr2:75879125-75938115	chr2:75935615-75940615	1933.26	-0.254476	0.113884	FALSE	2097.83	0.32396	0.000447857	FALSE	2711.9	0.0346337	0.968297	FALSE	88.6333	0.594952	0.442415	FALSE	1984.88	0.262448	0.0473153	FALSE	9.54612	0.430237	NA	FALSE	244.304	-0.291576	0.504515	FALSE	118.048	0.208694	0.999947	FALSE	3426.59	0.0778148	0.999981	FALSE	15.5413	-0.0458047	NA	FALSE	403.036	0.152806	0.977572	FALSE
ENSG00000005448	WDR54	chr2:74648804-74652882	chr2:74646304-74651304	1243.64	1.26571	0.000174015	TRUE	1216.46	0.164675	0.72179	FALSE	1017.58	0.636222	0.0442411	FALSE	7.9045	-0.478219	0.619732	FALSE	93.5544	0.439697	0.0981476	FALSE	18.3938	-0.526184	0.494923	FALSE	336.267	1.01893	0.00492847	TRUE	14.0727	-0.279804	0.999947	FALSE	135.502	0.024187	0.999981	FALSE	28.6783	-0.426646	0.999877	FALSE	224.779	0.365882	0.876726	FALSE
ENSG00000005469	CROT	chr7:86974996-87029111	chr7:86972496-86977496	1643.07	0.109292	0.818249	FALSE	2269.42	-0.0845948	0.664714	FALSE	1298.22	0.317542	0.321283	FALSE	99.4777	0.223554	0.76932	FALSE	1318.38	0.1897	0.131179	FALSE	11.061	0.225752	NA	FALSE	115.732	-0.0746057	0.891553	FALSE	104.729	0.331953	0.999947	FALSE	2480.9	-0.0368028	0.999981	FALSE	12.3793	-0.0334717	NA	FALSE	246.157	-0.0631922	0.987606	FALSE
ENSG00000005471	ABCB4	chr7:87031012-87109751	chr7:87107251-87112251	53.8403	1.94138	3.15908e-07	TRUE	50.6442	-0.546327	0.238555	FALSE	18.9421	-0.296399	0.850456	FALSE	4405.66	0.0530674	0.950795	FALSE	284.404	-0.0600573	0.880114	FALSE	255.089	-0.277878	0.70842	FALSE	11.7581	0.772481	NA	FALSE	1175.65	-0.169476	0.999947	FALSE	966.124	-0.123679	0.999981	FALSE	47.4288	0.0384546	0.999877	FALSE	9.19569	-0.351585	NA	FALSE
ENSG00000005483	KMT2E	chr7:104654625-104754808	chr7:104652125-104657125	2658.14	0.39837	0.192637	FALSE	1905.24	-0.345175	0.0181364	FALSE	9150.05	-0.0454895	0.945155	FALSE	128.614	0.566248	0.49555	FALSE	3503.77	0.246353	0.035364	FALSE	6.22877	0.632995	NA	FALSE	1208.4	-0.358397	0.378439	FALSE	192.026	0.0796943	0.999947	FALSE	6344.67	-0.0686148	0.999981	FALSE	24.7851	-0.394043	0.999877	FALSE	1411.97	-0.0314698	0.994747	FALSE
ENSG00000005486	RHBDD2	chr7:75471919-75518244	chr7:75469419-75474419	3231.98	-0.12872	0.695166	FALSE	1768.62	-0.0634437	0.886688	FALSE	8019.64	-0.0937023	0.917763	FALSE	360.116	-0.0675687	0.90701	FALSE	617.369	-0.0188932	0.941512	FALSE	23.3368	-0.530948	0.459027	FALSE	52.9562	1.29387	0.00371509	TRUE	139.837	0.434501	0.999947	FALSE	891.086	0.0924088	0.999981	FALSE	12.0878	0.309613	NA	FALSE	18.2613	0.122954	0.986935	FALSE
ENSG00000005513	SOX8	chr16:1031807-1036979	chr16:1029307-1034307	7.02574	-0.769824	0.452496	FALSE	0.925985	-1.95011	NA	FALSE	3.91531	-0.498366	NA	FALSE	762.29	0.112227	0.84333	FALSE	6.83302	-0.105647	NA	FALSE	796.189	0.137925	0.797262	FALSE	31.3041	-0.618567	0.329665	FALSE	453.936	-0.0784958	0.999947	FALSE	13.9317	0.137291	NA	FALSE	479.162	-0.221381	0.999877	FALSE	11.0047	0.172156	NA	FALSE
ENSG00000005700	IBTK	chr6:82879699-82957471	chr6:82954971-82959971	11418.4	-0.185466	0.187849	FALSE	9838.88	0.157711	0.0503679	FALSE	10718.3	-0.291175	0.260932	FALSE	102.11	0.433951	0.580276	FALSE	2975.87	0.233171	0.10097	FALSE	9.01431	0.22503	NA	FALSE	402.881	-0.304446	0.496509	FALSE	158.989	0.323368	0.999947	FALSE	5312.8	-0.0123312	0.999981	FALSE	12.8485	-0.164688	NA	FALSE	499.171	0.00301735	0.999759	FALSE
ENSG00000005801	ZNF195	chr11:3360490-3400448	chr11:3397948-3402948	1993.74	0.0948937	0.543475	FALSE	1665.6	0.226852	0.122259	FALSE	1495.34	0.0612465	0.887209	FALSE	670.365	0.58904	0.256282	FALSE	938.762	0.205124	0.218246	FALSE	17.2669	0.431154	0.623224	FALSE	158.467	-0.228351	0.589804	FALSE	397.264	0.199179	0.999947	FALSE	1510.02	-0.0777468	0.999981	FALSE	19.2768	0.184145	NA	FALSE	183.038	0.20932	0.977023	FALSE
ENSG00000005810	MYCBP2	chr13:77618791-77901185	chr13:77898685-77903685	12252.7	-0.0967875	0.866882	FALSE	9326.03	0.0673265	0.716151	FALSE	15013.2	-0.509524	6.49278e-05	FALSE	402.075	0.439699	0.553992	FALSE	8716.6	-0.0482847	0.764503	FALSE	7.09428	0.596472	NA	FALSE	253.257	-0.635848	0.127494	FALSE	472.002	0.188364	0.999947	FALSE	12644.4	-0.0933294	0.999981	FALSE	9.49327	-0.14251	NA	FALSE	287.217	0.243839	0.97397	FALSE
ENSG00000005812	FBXL3	chr13:77566739-77601330	chr13:77598830-77603830	6579.75	-0.724312	1.82524e-06	FALSE	4185.3	-0.175821	0.0443185	FALSE	5043.31	-0.15643	0.564427	FALSE	42.8032	0.512474	0.550425	FALSE	1236.66	0.301441	0.0139926	FALSE	6.78821	-0.407026	NA	FALSE	280.575	-0.456176	0.260647	FALSE	57.7368	0.0889752	0.999947	FALSE	1985.83	-0.185977	0.999981	FALSE	11.6476	-0.155413	NA	FALSE	412.191	0.109006	0.986935	FALSE
ENSG00000005844	ITGAL	chr16:30483978-30534506	chr16:30481478-30486478	12.6082	1.3334	0.0159427	FALSE	6.23739	0.0732596	0.959579	FALSE	4.02368	-0.827495	NA	FALSE	1130.44	0.589858	0.171516	FALSE	223.039	-0.324778	0.207414	FALSE	157.168	0.901125	0.0294894	FALSE	14.7795	0.0634687	NA	FALSE	441.337	-0.387065	0.999947	FALSE	409.711	-0.0591908	0.999981	FALSE	73.0086	-0.39805	0.999877	FALSE	7.91953	0.150479	NA	FALSE
ENSG00000005882	PDK2	chr17:48172100-48189516	chr17:48169600-48174600	1216.31	0.103425	0.777077	FALSE	672.216	0.234631	0.265367	FALSE	1626.98	-0.0980282	0.939112	FALSE	31.3009	0.532248	0.513608	FALSE	542.099	0.147446	0.466273	FALSE	5.28339	0.380699	NA	FALSE	155.952	-0.328916	0.425421	FALSE	43.9107	-0.0238638	0.999947	FALSE	682.209	-0.10944	0.999981	FALSE	13.7106	0.0106439	NA	FALSE	121.833	0.202738	0.977409	FALSE
ENSG00000005884	ITGA3	chr17:48133331-48167845	chr17:48130831-48135831	125807	0.407458	0.19972	FALSE	83185.4	-0.906725	6.387e-11	FALSE	239169	-0.470755	0.496292	FALSE	52.0398	0.77853	0.373525	FALSE	1811.16	0.315897	0.0101188	FALSE	9.63257	1.13891	NA	FALSE	559.786	-0.501756	0.168649	FALSE	77.0122	-0.252523	0.999947	FALSE	3158.74	-0.136248	0.999981	FALSE	18.1141	-0.0907875	NA	FALSE	746.73	-0.0209125	0.996074	FALSE
ENSG00000005889	ZFX	chrX:24167289-24234372	chrX:24164789-24169789	4854.54	-0.321963	0.0998703	FALSE	3850.55	-0.0262425	0.910823	FALSE	5685.79	-0.149021	0.659327	FALSE	40.348	0.565039	0.537798	FALSE	1228.64	0.281593	0.045624	FALSE	5.2287	0.511446	NA	FALSE	523.626	-0.733131	0.108834	FALSE	64.7369	0.0790206	0.999947	FALSE	2114.51	-0.14513	0.999981	FALSE	12.1859	-0.260592	NA	FALSE	787.174	0.0720118	0.986935	FALSE
ENSG00000005893	LAMP2	chrX:119561681-119603220	chrX:119600720-119605720	28924.4	-0.0462425	0.928812	FALSE	28660.7	0.100695	0.3256	FALSE	36825.4	0.209436	0.84511	FALSE	28.1887	0.42797	0.614952	FALSE	712.243	0.145343	0.376648	FALSE	10.3055	0.0320119	NA	FALSE	169.24	-0.846586	0.0206884	FALSE	47.3731	0.239166	0.999947	FALSE	1449.71	-0.0541997	0.999981	FALSE	7.871	-0.103556	NA	FALSE	183.57	0.0228796	0.996074	FALSE
ENSG00000005955	GGNBP2	chr17:34900736-34946278	chr17:34898236-34903236	4689.84	-0.0947345	0.679083	FALSE	4318.06	-0.198092	0.174217	FALSE	4205.86	0.00898214	0.985398	FALSE	49.0356	0.436733	0.607389	FALSE	1701.06	0.208507	0.104149	FALSE	6.30771	0.121359	NA	FALSE	558.257	-0.688061	0.0388746	FALSE	81.1586	0.0250542	0.999947	FALSE	2752.84	-0.0587494	0.999981	FALSE	17.1837	-0.450963	NA	FALSE	872.322	0.119629	0.986935	FALSE
ENSG00000005961	ITGA2B	chr17:42449547-42466873	chr17:42464373-42469373	48.7777	0.825207	0.0321787	FALSE	53.5773	0.0244425	0.977914	FALSE	38.8673	0.582365	0.547465	FALSE	376.17	0.458042	0.342691	FALSE	84.8644	-0.332358	0.279102	FALSE	13.9542	0.700675	NA	FALSE	16.1081	0.132127	NA	FALSE	223.624	0.0916289	0.999947	FALSE	175.334	0.0847387	0.999981	FALSE	8.22059	0.192238	NA	FALSE	5.65702	0.205481	NA	FALSE
ENSG00000005981	ASB4	chr7:95107755-95169544	chr7:95105255-95110255	4.82762	2.93495	0.0136859	FALSE	11.3825	0.707903	0.536673	FALSE	1.71679	0.563584	NA	FALSE	2174.07	-0.729481	0.040838	FALSE	443.306	0.412576	0.0375694	FALSE	13.0653	-0.416901	NA	FALSE	108.899	-0.0506949	0.942697	FALSE	631.711	0.513973	0.999947	FALSE	1102.72	0.0691256	0.999981	FALSE	13.1993	-0.00639986	NA	FALSE	65.9106	0.313018	0.953289	FALSE
ENSG00000006007	GDE1	chr16:19513014-19533467	chr16:19530967-19535967	6774.7	-0.673327	0.00174409	FALSE	7531.79	-0.0314855	0.793975	FALSE	12327.6	0.0541244	0.934243	FALSE	68.9257	-0.676708	0.419661	FALSE	612.558	0.189051	0.208813	FALSE	8.91651	0.594375	NA	FALSE	300.952	-0.0656514	0.886277	FALSE	37.3711	-0.110155	0.999947	FALSE	1239.94	-0.125752	0.999981	FALSE	13.1658	-0.312534	NA	FALSE	383.962	0.379108	0.830743	FALSE
ENSG00000006015	C19orf60	chr19:18699494-18703146	chr19:18696994-18701994	1663.77	-0.118915	0.800532	FALSE	2259.2	0.00547286	0.978722	FALSE	836.995	0.209275	0.649499	FALSE	6.78152	0.320828	0.751003	FALSE	80.6745	0.281907	0.313941	FALSE	11.5476	0.23994	NA	FALSE	181.986	-0.218443	0.609282	FALSE	12.9598	-0.0959893	0.999947	FALSE	152.048	0.202949	0.999981	FALSE	21.2297	-0.230436	NA	FALSE	256.28	0.352496	0.890191	FALSE
ENSG00000006016	CRLF1	chr19:18683029-18718551	chr19:18716051-18721051	1031.95	1.91576	3.47145e-07	TRUE	354.657	0.72536	3.11152e-06	FALSE	433.012	0.46864	0.562612	FALSE	299.898	0.370392	0.514895	FALSE	599.926	0.25992	0.101394	FALSE	188.393	-0.0370977	0.954664	FALSE	18.34	0.185043	0.813287	FALSE	347.136	-0.0676259	0.999947	FALSE	877.776	0.0879938	0.999981	FALSE	260.409	-0.250657	0.999877	FALSE	14.3346	0.396453	NA	FALSE
ENSG00000006025	OSBPL7	chr17:45884737-45899200	chr17:45896700-45901700	1304.36	0.647737	0.000282223	FALSE	787.327	0.0239477	0.951384	FALSE	1021.75	-0.177787	0.863597	FALSE	20.6228	0.154221	0.874287	FALSE	594.706	0.269661	0.0684145	FALSE	7.77269	0.348573	NA	FALSE	115.718	-0.192034	0.72573	FALSE	25.8421	-0.342893	0.999947	FALSE	750.177	-0.0691878	0.999981	FALSE	9.19504	-0.137552	NA	FALSE	88.5431	0.0309983	0.995551	FALSE
ENSG00000006042	TMEM98	chr17:31254927-31272124	chr17:31252427-31257427	3628.88	-0.683178	0.0507579	FALSE	6930.9	-0.448088	3.76639e-05	FALSE	7567.07	-0.344241	0.590552	FALSE	38.4044	0.54145	0.476718	FALSE	464.2	-0.134737	0.547085	FALSE	12.7994	0.382921	NA	FALSE	132.774	-0.205358	0.674064	FALSE	38.9797	0.0172222	0.999947	FALSE	813.592	-0.283406	0.999981	FALSE	13.505	-0.222836	NA	FALSE	372.736	-0.0278587	0.995551	FALSE
ENSG00000006047	YBX2	chr17:7191570-7197934	chr17:7195434-7200434	34.2124	-1.37437	0.0116558	FALSE	8.6753	3.36136	0.0156325	FALSE	1.37101	1.55714	NA	FALSE	454.28	1.00315	0.0100415	TRUE	23.1081	-0.485735	NA	FALSE	183.341	0.869235	0.0255244	FALSE	42.6555	-0.309809	0.635434	FALSE	300.588	-0.0404741	0.999947	FALSE	36.2059	-0.125311	NA	FALSE	193.63	-0.105657	0.999877	FALSE	38.5609	0.58827	0.616413	FALSE
ENSG00000006059	KRT33A	chr17:39502343-39507064	chr17:39504564-39509564	1.62539	1.24936	0.451819	FALSE	1.52739	1.60164	0.494002	FALSE	0.849263	1.87388	NA	FALSE	88.3079	0.364365	0.555799	FALSE	34.1551	-0.233132	0.498983	FALSE	172.979	-0.0595186	0.918766	FALSE	11.6684	0.285545	NA	FALSE	57.747	0.239769	0.999947	FALSE	55.2943	0.0304532	0.999981	FALSE	84.0757	0.0906505	0.999877	FALSE	3.30437	-0.0727236	NA	FALSE
ENSG00000006062	MAP3K14	chr17:43340487-43394414	chr17:43391914-43396914	789.572	0.669364	0.0416738	FALSE	1013.65	0.54729	0.0103414	FALSE	2578.63	-0.529951	0.507796	FALSE	55.4306	0.673714	0.43048	FALSE	1883.63	0.325392	0.0066958	FALSE	0	NA	NA	FALSE	0	NA	NA	FALSE	79.257	-0.0280871	0.999947	FALSE	2841.5	0.0384381	0.999981	FALSE	0	NA	NA	FALSE	0	NA	NA	FALSE
ENSG00000006071	ABCC8	chr11:17414431-17498449	chr11:17495949-17500949	3.12113	-0.775659	0.65025	FALSE	7.7611	-1.73203	0.0322939	FALSE	17.2331	0.511236	0.943175	FALSE	4596.57	0.370169	0.450686	FALSE	366.924	-0.764518	0.00206034	TRUE	567.884	0.176407	0.69554	FALSE	12.0075	-0.187469	NA	FALSE	1894.85	0.10279	0.999947	FALSE	720.562	-0.260522	0.999981	FALSE	308.605	-0.272926	0.999877	FALSE	6.74015	0.11353	NA	FALSE
ENSG00000006074	CCL18	chr17:34391639-34399392	chr17:34389139-34394139	1.10038	-0.911172	0.7209	FALSE	5.64692	-5.82006	2.25567e-07	FALSE	5.51767	0.689142	0.861672	FALSE	230.87	0.913258	0.0658036	FALSE	42.4676	-0.452125	0.150273	FALSE	269.333	0.692627	0.106593	FALSE	9.38404	0.0162312	NA	FALSE	74.4111	0.37885	0.999947	FALSE	100.766	-0.0921004	0.999981	FALSE	80.4515	0.180477	0.999877	FALSE	10.0893	-0.0233426	NA	FALSE
ENSG00000006075	CCL3	chr17:34415601-34417515	chr17:34415015-34420015	10.7962	3.27925	0.022557	FALSE	417.876	-1.09875	0.502935	FALSE	309.964	1.49251	5.17289e-06	TRUE	33.8979	1.51926	0.0279293	TRUE	10.5628	-0.415765	NA	FALSE	119.172	2.07057	0.000578478	TRUE	18.9677	0.411946	0.547939	FALSE	10.0722	0.319501	NA	FALSE	42.1584	-0.0506188	NA	FALSE	32.1265	0.640665	0.883794	FALSE	52.0583	0.0922287	0.986935	FALSE
ENSG00000006114	SYNRG	chr17:35874899-35969544	chr17:35967044-35972044	3607.38	0.081049	0.723478	FALSE	2737.13	-0.0617545	0.643668	FALSE	5532.1	-0.00853057	0.990785	FALSE	107.26	0.665074	0.391505	FALSE	3404.11	0.192285	0.104492	FALSE	6.89585	0.515069	NA	FALSE	218.171	-0.364937	0.378879	FALSE	146.378	0.231016	0.999947	FALSE	5382.65	-0.0220184	0.999981	FALSE	12.1312	-0.0142049	NA	FALSE	320.292	0.150066	0.981566	FALSE
ENSG00000006116	CACNG3	chr16:24266873-24374122	chr16:24264373-24269373	0.375092	1.66911	NA	FALSE	0.622856	-2.63034	NA	FALSE	0	NA	NA	FALSE	5462.56	0.0978397	0.857504	FALSE	213.1	-0.59903	0.0418195	TRUE	319.998	-0.631619	0.125671	FALSE	12.0815	0.370905	NA	FALSE	1581.5	-0.434527	0.999947	FALSE	690.744	-0.724453	0.219986	FALSE	186.863	-0.930616	0.412606	FALSE	4.85522	0.0536555	NA	FALSE
ENSG00000006118	TMEM132A	chr11:60691934-60704631	chr11:60689434-60694434	6992.11	0.0691595	0.866024	FALSE	7610.36	-0.319933	0.107941	FALSE	5987.72	0.791476	0.001511	FALSE	24.3406	0.195389	0.816544	FALSE	424.787	0.0946523	0.670105	FALSE	11.0835	-0.0549291	NA	FALSE	106.385	0.467748	0.257499	FALSE	28.6567	-0.282926	0.999947	FALSE	648.354	-0.00991206	0.999981	FALSE	17.6217	-0.360922	NA	FALSE	169.06	0.180025	0.978083	FALSE
ENSG00000006125	AP2B1	chr17:33905064-34053436	chr17:33902564-33907564	16556.2	0.174952	0.613606	FALSE	10437.6	-0.103681	0.792702	FALSE	37508.6	-0.302575	0.166428	FALSE	265.818	0.624555	0.394945	FALSE	5676.51	0.209586	0.0344915	FALSE	7.64564	0.409156	NA	FALSE	195.04	-0.719129	0.0729335	FALSE	248.429	0.286953	0.999947	FALSE	8441.38	0.010765	0.999981	FALSE	10.8037	-0.262284	NA	FALSE	200.427	0.189289	0.977409	FALSE
ENSG00000006128	TAC1	chr7:97361219-97369784	chr7:97358719-97363719	2.10701	0.0328404	0.991697	FALSE	14.3773	-2.56261	0.0959664	FALSE	196.147	-2.60505	0.00148098	TRUE	821.139	-1.13045	0.00602774	TRUE	5.6438	0.210006	NA	FALSE	555.763	-0.910435	0.022001	FALSE	14.1043	0.102388	NA	FALSE	377.533	-0.507386	0.999947	FALSE	40.4563	0.21385	NA	FALSE	333.417	-0.443072	0.999877	FALSE	10.8554	0.237527	NA	FALSE
ENSG00000006194	ZNF263	chr16:3313742-3351401	chr16:3311242-3316242	3333.69	0.0367411	0.877749	FALSE	3482	0.0238842	0.879308	FALSE	2221.7	0.0138217	0.984755	FALSE	290.817	0.151919	0.809247	FALSE	734.588	-0.000913927	0.997447	FALSE	10.6053	0.0981983	NA	FALSE	271.54	-0.717472	0.0416893	FALSE	168.365	0.0751711	0.999947	FALSE	1241.5	-0.219659	0.999981	FALSE	16.6298	-0.0486212	NA	FALSE	358.816	0.177274	0.977409	FALSE
ENSG00000006210	CX3CL1	chr16:57406369-57418960	chr16:57403869-57408869	21.1058	3.74781	0.000234111	FALSE	2.91254	0.370793	0.783156	FALSE	1.74118	1.10115	NA	FALSE	196.252	0.403268	0.509088	FALSE	92.0275	-0.430145	0.110546	FALSE	137.668	0.28396	0.629762	FALSE	30.8502	0.476457	0.427496	FALSE	96.0417	0.151017	0.999947	FALSE	161.802	-0.127465	0.999981	FALSE	87.957	0.0671604	0.999877	FALSE	11.277	0.164117	NA	FALSE
ENSG00000006282	SPATA20	chr17:48620418-48633213	chr17:48617918-48622918	8819.17	0.554936	0.00767251	FALSE	3770.61	-0.124101	0.316447	FALSE	3464	-0.129145	0.848089	FALSE	45.9705	0.225624	0.780224	FALSE	392.75	0.2335	0.216825	FALSE	17.3029	0.780175	0.297715	FALSE	127.354	-0.412396	0.388342	FALSE	40.3287	-0.105925	0.999947	FALSE	482.177	0.0546834	0.999981	FALSE	19.4689	-0.033178	NA	FALSE	184.061	0.138636	0.986935	FALSE
ENSG00000006283	CACNA1G	chr17:48638428-48704835	chr17:48635928-48640928	45.3622	0.345712	0.487322	FALSE	24.8104	0.139525	0.868936	FALSE	27.0889	0.0397074	0.985987	FALSE	1929.46	0.615234	0.108507	FALSE	443.424	-0.448163	0.0157219	FALSE	381.07	0.479758	0.281832	FALSE	44.8931	0.256074	0.701603	FALSE	1267.33	-0.0608064	0.999947	FALSE	717.959	0.0318088	0.999981	FALSE	329.142	-0.295938	0.999877	FALSE	34.0163	0.71557	0.376894	FALSE
ENSG00000006327	TNFRSF12A	chr16:3068445-3072384	chr16:3065945-3070945	8766.93	-0.696075	0.00604094	FALSE	21042.9	0.22523	0.0494827	FALSE	12734.7	0.200944	0.380449	FALSE	7.64573	0.734893	0.457828	FALSE	56.6746	0.181494	0.590422	FALSE	11.8377	0.644001	NA	FALSE	193.466	-0.136986	0.767072	FALSE	23.3157	-0.344963	0.999947	FALSE	185.789	0.168271	0.999981	FALSE	22.0247	-0.172017	NA	FALSE	410.644	-0.00561158	0.999209	FALSE
ENSG00000006377	DLX6	chr7:96634859-96640351	chr7:96632359-96637359	2.79656	-0.813682	0.608337	FALSE	104.69	-0.152707	0.726773	FALSE	139.5	0.306996	0.698704	FALSE	32.8653	0.637028	0.423665	FALSE	82.9239	-0.291619	0.318928	FALSE	35.9625	0.905456	0.121717	FALSE	10.9177	0.0142926	NA	FALSE	22.2162	-0.202286	0.999947	FALSE	173.82	-0.0260643	0.999981	FALSE	23.8296	0.125019	0.999877	FALSE	260.297	0.111379	0.986935	FALSE
ENSG00000006432	MAP3K9	chr14:71189242-71276251	chr14:71273751-71278751	2310.35	-0.504283	0.0185353	FALSE	1186.71	-0.303888	0.0187892	FALSE	5316.75	0.0596803	0.941824	FALSE	160.781	0.231699	0.800406	FALSE	2467.41	0.244786	0.257768	FALSE	14.7926	0.237532	0.823649	FALSE	220.749	-0.453446	0.256798	FALSE	292.705	0.134707	0.999947	FALSE	3185.86	-0.417094	0.999981	FALSE	28.8502	-0.290138	0.999877	FALSE	284.68	0.215052	0.977023	FALSE
ENSG00000006451	RALA	chr7:39663081-39747723	chr7:39660581-39665581	3490.07	0.0361812	0.922788	FALSE	5955.29	0.12354	0.444975	FALSE	11446.9	0.131151	0.801182	FALSE	127.388	0.551065	0.434528	FALSE	2169.48	0.289316	0.0351071	FALSE	6.47127	0.273463	NA	FALSE	405.48	-0.467158	0.213052	FALSE	193.955	0.44013	0.999947	FALSE	5718.08	0.325348	0.999981	FALSE	21.5795	-0.446984	NA	FALSE	1016.46	0.447258	0.719886	FALSE
ENSG00000006453	BAIAP2L1	chr7:97920962-98030380	chr7:98027880-98032880	1231.2	-0.447562	0.222084	FALSE	413.243	1.07843	2.01448e-12	TRUE	1783.23	0.59027	0.606046	FALSE	317.25	-0.0580488	0.932929	FALSE	1881.74	0.0677078	0.733039	FALSE	33.6451	0.9226	0.105518	FALSE	105.707	-0.0659585	0.917933	FALSE	369.642	-0.362795	0.999947	FALSE	2697.47	0.281225	0.999981	FALSE	25.3784	-0.324985	0.999877	FALSE	84.7781	1.73333	6.67702e-06	TRUE
ENSG00000006459	KDM7A	chr7:139784545-139876835	chr7:139874335-139879335	1476.15	0.425245	0.311823	FALSE	1130.56	-0.405698	1.92666e-05	FALSE	1782.26	-0.0868125	0.929303	FALSE	263.484	-0.215633	0.755637	FALSE	1845.68	0.0461363	0.838351	FALSE	18.8601	0.448998	0.598741	FALSE	495.664	-0.300079	0.546498	FALSE	201.452	0.0535459	0.999947	FALSE	2580.46	-0.506147	0.701938	FALSE	21.1976	-0.262373	NA	FALSE	778.828	-0.263409	0.951685	FALSE
ENSG00000006468	ETV1	chr7:13930852-14031050	chr7:14028550-14033550	101.041	7.12308	8.7376e-08	TRUE	1.59881	-0.302588	0.926541	FALSE	39.8352	-0.7344	0.872817	FALSE	484.349	-0.511629	0.359981	FALSE	1045.02	0.301992	0.0538054	FALSE	27.4195	0.0373073	0.967123	FALSE	26.0512	0.906062	0.077958	FALSE	717.404	0.473538	0.999947	FALSE	2736.54	0.887188	0.022717	TRUE	65.5574	-0.128734	0.999877	FALSE	43.5115	1.21437	0.00472388	TRUE
ENSG00000006530	AGK	chr7:141250988-141355044	chr7:141248488-141253488	2323.47	-0.108382	0.712586	FALSE	1270.76	-0.223416	0.201774	FALSE	2525.41	0.127501	0.800573	FALSE	139.491	0.488379	0.529815	FALSE	2932.99	0.0454921	0.75343	FALSE	8.54358	0.521521	NA	FALSE	156.971	0.0102674	0.984391	FALSE	150.61	-0.0729192	0.999947	FALSE	3621.47	-0.357264	0.999981	FALSE	13.1331	-0.266454	NA	FALSE	220.576	-0.0409077	0.994329	FALSE
ENSG00000006534	ALDH3B1	chr11:67776047-67796744	chr11:67773547-67778547	3901.5	0.489325	0.159137	FALSE	3063.25	0.456003	0.0231994	FALSE	1766.34	-0.523545	0.46528	FALSE	26.8157	0.778211	0.370519	FALSE	614.271	0.475971	0.00157651	FALSE	10.6752	0.357863	NA	FALSE	354.556	-0.906476	0.00871695	FALSE	46.7567	-0.272569	0.999947	FALSE	1036.2	0.000457581	0.999981	FALSE	14.0936	0.209477	NA	FALSE	283.215	-0.0827612	0.986935	FALSE
ENSG00000006555	TTC22	chr1:55245384-55266940	chr1:55264440-55269440	0.500625	2.40906	NA	FALSE	0.883315	-0.51719	NA	FALSE	1.6075	1.54929	NA	FALSE	811.041	0.027876	0.961625	FALSE	104.531	-0.333304	0.222671	FALSE	231.441	-0.533023	0.207384	FALSE	13.8332	0.213205	NA	FALSE	641.877	-0.0559814	0.999947	FALSE	140.871	-0.11995	0.999981	FALSE	144.575	-0.135129	0.999877	FALSE	11.8106	0.258548	NA	FALSE
ENSG00000006576	PHTF2	chr7:77428121-77586818	chr7:77425621-77430621	5837.05	-1.25029	0.000358882	TRUE	2669.15	0.408378	0.0911356	FALSE	6771.67	-0.62985	0.000450675	FALSE	274.308	0.483479	0.514987	FALSE	2792.57	-0.0757553	0.599168	FALSE	6.50694	0.132102	NA	FALSE	223.913	-0.280882	0.514824	FALSE	287.034	0.397734	0.999947	FALSE	4263.14	0.310851	0.999981	FALSE	9.91099	-0.269857	NA	FALSE	329.335	0.553467	0.488683	FALSE
ENSG00000006606	CCL26	chr7:75398850-75419214	chr7:75416714-75421714	108	-0.39921	0.495207	FALSE	99.4224	-1.46168	0.000425071	TRUE	187.351	0.191477	0.94101	FALSE	121.478	-0.426604	0.493462	FALSE	112.578	0.00168772	0.997038	FALSE	35.273	0.379367	0.617585	FALSE	54.4966	-0.375259	0.482717	FALSE	53.5597	0.216775	0.999947	FALSE	189.244	0.390123	0.999981	FALSE	17.6888	0.147014	NA	FALSE	21.7561	0.356728	0.922706	FALSE
ENSG00000006607	FARP2	chr2:242295657-242434256	chr2:242293157-242298157	3270.05	-0.524257	1.52135e-05	FALSE	1634.69	0.0704271	0.798945	FALSE	3640.16	-0.0822915	0.865624	FALSE	772.854	-0.244717	0.67125	FALSE	3202.77	0.0730236	0.552211	FALSE	6.57537	0.113197	NA	FALSE	162.316	-0.23372	0.604821	FALSE	713.802	-0.245382	0.999947	FALSE	3935.95	-0.136319	0.999981	FALSE	13.4523	-0.0987795	NA	FALSE	230.105	0.326479	0.914772	FALSE
ENSG00000006611	USH1C	chr11:17515441-17565963	chr11:17563463-17568463	1.00863	0.0324708	NA	FALSE	2.01735	-0.735847	0.728904	FALSE	1.51036	-0.849695	NA	FALSE	2202.25	0.962017	0.0123893	FALSE	278.656	-0.879248	9.25906e-06	TRUE	212.757	0.740238	0.0915526	FALSE	13.0585	0.225947	NA	FALSE	768.598	0.233108	0.999947	FALSE	526.674	-0.310223	0.999981	FALSE	136.496	0.100846	0.999877	FALSE	6.22876	0.210693	NA	FALSE
ENSG00000006625	GGCT	chr7:30536236-30591095	chr7:30588595-30593595	1756.79	-0.181512	0.671387	FALSE	3332.83	1.0072	8.06117e-71	TRUE	1681.53	0.025697	0.977653	FALSE	280.731	-0.756358	0.158702	FALSE	734.864	0.264154	0.0645213	FALSE	7.26528	0.551332	NA	FALSE	183.79	-0.637686	0.180547	FALSE	193.041	0.716783	0.955258	FALSE	1940.64	0.483273	0.787872	FALSE	18.5843	0.168416	NA	FALSE	355.866	0.180467	0.977409	FALSE
ENSG00000006634	DBF4	chr7:87505530-87538856	chr7:87503030-87508030	1549.15	-0.162679	0.734957	FALSE	2088.9	0.210286	0.393447	FALSE	2527	0.0337198	0.961245	FALSE	45.0335	0.458199	0.57796	FALSE	1125.18	0.295819	0.0182656	FALSE	7.77752	-0.141724	NA	FALSE	274.856	-0.339053	0.412039	FALSE	59.778	0.0277458	0.999947	FALSE	1889.92	0.149253	0.999981	FALSE	14.5176	-0.276347	NA	FALSE	478.162	0.168181	0.977409	FALSE
ENSG00000006638	TBXA2R	chr19:3594503-3606838	chr19:3604338-3609338	181.458	-0.349645	0.321597	FALSE	140.708	0.0523408	0.929809	FALSE	243.529	0.657014	0.159017	FALSE	34.4684	0.359503	0.684885	FALSE	154.51	-0.274621	0.32788	FALSE	14.0411	0.770809	NA	FALSE	156.523	-0.524855	0.192075	FALSE	54.4669	0.152496	0.999947	FALSE	158.05	-0.0583219	0.999981	FALSE	25.4511	-0.0192439	0.999877	FALSE	210.377	0.267026	0.972714	FALSE
ENSG00000006652	IFRD1	chr7:112063022-112121072	chr7:112060522-112065522	5069.47	-0.976933	0.0184343	FALSE	5653.36	-0.051522	0.91256	FALSE	4361.13	-0.426973	0.0711633	FALSE	130.533	0.633188	0.388811	FALSE	1647.89	0.11862	0.486822	FALSE	8.25153	0.198412	NA	FALSE	87.257	-0.457843	0.368495	FALSE	152.096	0.130201	0.999947	FALSE	3070.96	-0.0538784	0.999981	FALSE	9.36239	0.261098	NA	FALSE	75.8919	0.0801249	0.987255	FALSE
ENSG00000006659	LGALS14	chr19:40194945-40200084	chr19:40192445-40197445	0.158069	0.375248	NA	FALSE	0.148341	-0.706327	NA	FALSE	0.247777	1.223	NA	FALSE	316.717	0.131248	0.880929	FALSE	16.2079	-0.309181	NA	FALSE	318.971	-0.0299684	0.973542	FALSE	11.4917	-0.0910923	NA	FALSE	141.776	0.028874	0.999947	FALSE	21.8848	-0.0446697	NA	FALSE	134.604	0.0940341	0.999877	FALSE	4.13791	0.171258	NA	FALSE
ENSG00000006695	COX10	chr17:13972812-14111994	chr17:13970312-13975312	1158.45	-0.146503	0.556532	FALSE	859.244	0.346453	0.00307509	FALSE	3124.46	0.123909	0.860084	FALSE	209.896	0.254989	0.713266	FALSE	2599.9	0.118142	0.373175	FALSE	6.46598	0.284099	NA	FALSE	176.626	-0.0136944	0.979531	FALSE	244.287	0.339938	0.999947	FALSE	3945	0.11041	0.999981	FALSE	8.32904	-0.170323	NA	FALSE	201.293	0.219741	0.977023	FALSE
ENSG00000006704	GTF2IRD1	chr7:73868119-74016931	chr7:73865619-73870619	1840.37	-0.0810185	0.707137	FALSE	1620.55	0.0277986	0.886387	FALSE	3723.99	-0.221639	0.226559	FALSE	156.584	0.457936	0.577489	FALSE	4398.08	0.22217	0.0694141	FALSE	7.3907	0.202962	NA	FALSE	378.436	-0.169612	0.740668	FALSE	186.213	0.0778993	0.999947	FALSE	5905.34	-0.0710201	0.999981	FALSE	14.2478	-0.174671	NA	FALSE	771.4	0.0770748	0.986935	FALSE
ENSG00000006712	PAF1	chr19:39876491-39881835	chr19:39879335-39884335	4835.45	-0.421934	0.0542873	FALSE	4476.11	0.0319887	0.788487	FALSE	5053.89	0.0496776	0.934892	FALSE	9.41621	0.628245	0.529654	FALSE	236.324	0.0997938	0.667232	FALSE	7.98576	0.831246	NA	FALSE	409.35	-0.38431	0.399746	FALSE	7.81822	0.0210871	NA	FALSE	293.185	0.0121734	0.999981	FALSE	9.78256	-0.186702	NA	FALSE	423.154	0.162125	0.977409	FALSE
ENSG00000006715	VPS41	chr7:38762562-38971994	chr7:38969494-38974494	9506.63	-0.170837	0.491961	FALSE	12989.8	0.503538	0.180154	FALSE	9154.67	-0.274644	0.0640592	FALSE	1092.39	0.471809	0.391882	FALSE	4710.59	0.0146934	0.93205	FALSE	124.721	0.718835	0.088074	FALSE	15.815	0.174004	NA	FALSE	842.1	0.391355	0.999947	FALSE	9662.3	0.177003	0.999981	FALSE	50.2564	0.0993553	0.999877	FALSE	20.3253	0.246502	0.977023	FALSE
ENSG00000006740	ARHGAP44	chr17:12692855-12894960	chr17:12690355-12695355	148.698	-0.42524	0.173587	FALSE	140.255	1.29285	0.0147329	TRUE	673.852	1.36627	0.00923569	TRUE	7586.37	0.202625	0.66726	FALSE	1088.46	-0.346886	0.106431	FALSE	303.993	0.260102	0.563699	FALSE	25.0209	-0.526925	0.414921	FALSE	2343.28	0.0310295	0.999947	FALSE	1573.86	0.742239	0.202943	FALSE	158.445	-0.312484	0.999877	FALSE	37.1856	0.715146	0.362721	FALSE
ENSG00000006744	ELAC2	chr17:12895707-12921504	chr17:12919004-12924004	6128.5	0.196988	0.328611	FALSE	5056.1	0.130408	0.348338	FALSE	8349.67	0.306586	0.661459	FALSE	34.7164	0.584719	0.489676	FALSE	1233.64	0.232309	0.097423	FALSE	7.07741	0.434293	NA	FALSE	168.897	-0.257804	0.56899	FALSE	42.2908	0.0535556	0.999947	FALSE	1587.49	-0.0922507	0.999981	FALSE	12.4142	-0.0742456	NA	FALSE	186.416	0.0084301	0.999209	FALSE
ENSG00000006747	SCIN	chr7:12610202-12693228	chr7:12607702-12612702	184.101	1.78445	0.111329	FALSE	128.547	1.77371	0.00147193	TRUE	168.934	-0.455672	0.844608	FALSE	370.284	0.160783	0.794175	FALSE	919.997	0.189029	0.296572	FALSE	65.0784	0.297891	0.69007	FALSE	38.4757	0.161832	0.812133	FALSE	472.029	0.699145	0.961522	FALSE	2522.34	0.805003	0.0747335	FALSE	68.0047	0.552018	0.998239	FALSE	29.475	0.66187	0.453473	FALSE
ENSG00000006756	ARSD	chrX:2822010-2847392	chrX:2844892-2849892	4358.76	-0.209106	0.579334	FALSE	1955.39	-0.127886	0.641288	FALSE	1431.86	-0.597741	0.322861	FALSE	46.7534	1.40492	0.0114337	TRUE	305.081	0.0136498	0.958121	FALSE	8.8163	1.32959	NA	FALSE	209.827	-0.187942	0.670124	FALSE	33.6927	-0.0221893	0.999947	FALSE	381.279	-0.326641	0.999981	FALSE	9.69434	-0.248393	NA	FALSE	311.908	0.252261	0.953496	FALSE
ENSG00000006757	PNPLA4	chrX:7866287-7895780	chrX:7893280-7898280	691.759	0.194253	0.579904	FALSE	553.465	0.784791	0.0319124	FALSE	900.559	-0.382946	0.430287	FALSE	22.452	-0.0649723	0.948035	FALSE	435.066	0.1571	0.427828	FALSE	6.01	-0.386501	NA	FALSE	113.28	-0.0760588	0.901442	FALSE	45.9258	-0.436428	0.999947	FALSE	574.403	0.101532	0.999981	FALSE	10.6225	-0.074009	NA	FALSE	137.924	0.452339	0.785158	FALSE
ENSG00000006788	MYH13	chr17:10201400-10276447	chr17:10273947-10278947	33.9324	0.435895	0.716357	FALSE	64.5473	0.222209	0.829869	FALSE	1348.16	-2.77917	0.188039	FALSE	1516.62	0.842948	0.0951879	FALSE	350.565	-0.894301	0.00116002	TRUE	114.18	0.473236	0.487629	FALSE	11.8919	0.246787	NA	FALSE	649.565	-0.204125	0.999947	FALSE	1359.93	0.531712	0.736861	FALSE	44.3091	-0.115265	0.999877	FALSE	17.3995	0.133053	0.986935	FALSE
ENSG00000006831	ADIPOR2	chr12:1797739-1897844	chr12:1795239-1800239	5172.25	-0.235505	0.0786264	FALSE	6749.63	0.508632	0.288436	FALSE	9002.59	-0.0473913	0.934892	FALSE	155.753	0.389575	0.606692	FALSE	2113.06	0.183325	0.168083	FALSE	58.1569	0.313369	0.62563	FALSE	210.768	0.21955	0.656342	FALSE	327.531	0.713167	0.999947	FALSE	5883.89	0.561282	0.658797	FALSE	39.1152	0.388997	0.999877	FALSE	301.949	0.562961	0.625454	FALSE
ENSG00000006837	CDKL3	chr5:133541304-133706738	chr5:133704238-133709238	2148.06	-0.416454	0.0346522	FALSE	2196.27	0.122513	0.451063	FALSE	1434.98	0.0550402	0.894766	FALSE	970.823	-0.0380086	0.947282	FALSE	2125.44	0.26611	0.0141266	FALSE	9.48146	0.588988	NA	FALSE	526.389	-0.216508	0.64869	FALSE	688.302	-0.0873715	0.999947	FALSE	3633.32	-0.0529657	0.999981	FALSE	16.5028	-0.28429	NA	FALSE	578.679	-0.0173525	0.997586	FALSE
ENSG00000007001	UPP2	chr2:158733213-158992666	chr2:158730713-158735713	10.1716	-0.98094	0.342776	FALSE	21.9	-0.456602	0.710521	FALSE	81.3721	-0.538029	0.776341	FALSE	5445.12	0.51184	0.2111	FALSE	1714.15	-0.444745	0.00166774	FALSE	6.88216	0.858575	NA	FALSE	409.734	-0.435829	0.324132	FALSE	2840.24	0.135081	0.999947	FALSE	3282.06	-0.0781216	0.999981	FALSE	20.7676	-0.286757	NA	FALSE	660.915	0.219158	0.970996	FALSE
ENSG00000007038	PRSS21	chr16:2867163-2876305	chr16:2864663-2869663	2.03359	2.07452	0.197184	FALSE	0.913281	-1.26223	NA	FALSE	0	NA	NA	FALSE	179.463	0.454923	0.506143	FALSE	66.9976	-0.266182	0.43124	FALSE	120.209	0.381281	0.513422	FALSE	17.9627	0.21384	0.7793	FALSE	76.8468	-0.0957695	0.999947	FALSE	118.086	0.0750692	0.999981	FALSE	56.1581	-0.159125	0.999877	FALSE	12.6331	0.495445	NA	FALSE
ENSG00000007047	MARK4	chr19:45582545-45808541	chr19:45580045-45585045	1270.77	-0.219637	0.410063	FALSE	998.875	-0.0678508	0.802972	FALSE	2525.41	-0.329869	0.122134	FALSE	1992.56	0.156495	0.810861	FALSE	4743.61	-0.122653	0.359137	FALSE	9.99552	0.26991	NA	FALSE	145.57	-0.42422	0.399852	FALSE	1019.11	0.0684741	0.999947	FALSE	6430.02	-0.110103	0.999981	FALSE	8.80359	-0.261352	NA	FALSE	145.469	0.0666032	0.987606	FALSE
ENSG00000007062	PROM1	chr4:15964698-16086001	chr4:16083501-16088501	105.761	-2.10222	0.000286608	TRUE	28.2254	-2.33394	0.00711569	FALSE	31.6296	-1.69424	0.0644413	FALSE	5335.1	2.0458	4.47627e-12	TRUE	767.423	-0.772944	0.0015999	TRUE	823.212	0.574174	0.12502	FALSE	15.6128	-0.453228	NA	FALSE	2953.29	0.0631674	0.999947	FALSE	1264.18	-0.165458	0.999981	FALSE	505.084	-0.32455	0.999877	FALSE	6.77642	0.0558741	NA	FALSE
ENSG00000007080	CCDC124	chr19:18043824-18054800	chr19:18041324-18046324	2081.56	-0.534651	0.115081	FALSE	2474.35	0.000233522	0.998814	FALSE	1927.66	0.282213	0.255348	FALSE	11.0852	0.977862	0.279653	FALSE	308.317	0.088389	0.711103	FALSE	20.6532	0.931993	0.194539	FALSE	313.232	-0.192255	0.673455	FALSE	19.1696	0.213026	0.999947	FALSE	389.076	-0.0826497	0.999981	FALSE	26.3221	0.0153097	0.999877	FALSE	332.854	-0.0507741	0.990135	FALSE
ENSG00000007129	CEACAM21	chr19:42055885-42093197	chr19:42053385-42058385	2.61747	3.63185	0.0911131	FALSE	1.06345	-2.81001	NA	FALSE	5.86375	0.82237	0.755337	FALSE	3975.17	-0.142919	0.834546	FALSE	32.6075	0.01283	0.975449	FALSE	898.172	0.0736607	0.921491	FALSE	12.6003	-0.0209902	NA	FALSE	1350.92	-0.0761429	0.999947	FALSE	158.841	-0.0838001	0.999981	FALSE	288.739	0.00742773	0.999877	FALSE	6.68504	0.141196	NA	FALSE
ENSG00000007168	PAFAH1B1	chr17:2496503-2588909	chr17:2494003-2499003	14487	-0.508487	0.000311743	FALSE	11716.9	-0.0898798	0.421967	FALSE	14857.3	-0.0886886	0.800296	FALSE	117.867	0.634859	0.419175	FALSE	2598.94	0.22151	0.0771393	FALSE	8.66847	0.606375	NA	FALSE	487.499	-0.483395	0.217715	FALSE	169.809	-0.0444738	0.999947	FALSE	4411.98	-0.0804716	0.999981	FALSE	16.7614	-0.284073	NA	FALSE	678.835	0.122472	0.986935	FALSE
ENSG00000007171	NOS2	chr17:26083791-26127525	chr17:26125025-26130025	7.21021	-1.3573	0.0492387	FALSE	10.5891	1.17061	0.347233	FALSE	3.61481	1.16749	NA	FALSE	2331.95	0.521533	0.283597	FALSE	151.292	-0.667713	0.0188116	TRUE	354.098	1.07417	0.00356515	TRUE	11.1009	0.0747204	NA	FALSE	1098.06	-0.118692	0.999947	FALSE	270.885	-0.113196	0.999981	FALSE	128.782	-0.00866048	0.999877	FALSE	5.74149	0.0858083	NA	FALSE
ENSG00000007174	DNAH9	chr17:11501747-11873065	chr17:11499247-11504247	6.09862	-1.03176	0.339515	FALSE	4.09095	-0.928335	0.547593	FALSE	4.00611	-0.616001	NA	FALSE	11185	-1.7401	2.97638e-08	TRUE	601.048	-0.327537	0.220116	FALSE	60.0848	-1.59	0.00171402	TRUE	49.181	-1.11618	0.0120917	TRUE	2043.25	-0.083167	0.999947	FALSE	1119.75	0.0124616	0.999981	FALSE	27.6014	-0.275228	0.999877	FALSE	18.1958	0.0205946	0.997041	FALSE
ENSG00000007202	KIAA0100	chr17:26941457-26972472	chr17:26969972-26974972	26244.9	0.0942	0.68037	FALSE	18534.5	0.0307366	0.812765	FALSE	31257.1	-0.167965	0.705797	FALSE	36.3858	0.804616	0.346847	FALSE	1447.1	0.195497	0.143907	FALSE	8.20783	0.48699	NA	FALSE	238.463	-0.0149791	0.974977	FALSE	40.3055	0.421077	0.999947	FALSE	1769.48	-0.156545	0.999981	FALSE	12.5674	-0.155297	NA	FALSE	293.912	0.145185	0.986126	FALSE
ENSG00000007216	SLC13A2	chr17:26800310-26824799	chr17:26797810-26802810	0.354204	1.95598	NA	FALSE	0.232667	-1.21254	NA	FALSE	2.37044	2.60616	NA	FALSE	991.199	0.414357	0.380255	FALSE	115.97	-0.578894	0.0193512	FALSE	145.465	0.714143	0.139305	FALSE	17.7625	0.216196	0.774975	FALSE	352.59	-0.0107107	0.999947	FALSE	217.398	0.00462902	0.999981	FALSE	51.6112	0.278425	0.999877	FALSE	7.65226	0.104119	NA	FALSE
ENSG00000007237	GAS7	chr17:9813925-10101868	chr17:10099368-10104368	49.8013	0.333701	0.665314	FALSE	159.397	0.105003	0.964287	FALSE	559.35	1.32479	0.188788	FALSE	14219.6	-0.0437114	0.944967	FALSE	962.25	-0.680633	0.00994452	TRUE	361.81	0.111156	0.852308	FALSE	30.6111	-0.130521	0.868645	FALSE	6011.89	-0.0247037	0.999947	FALSE	3031.52	-0.193387	0.999981	FALSE	239.78	-0.307609	0.999877	FALSE	70.995	0.0553471	0.990605	FALSE
ENSG00000007255	TRAPPC6A	chr19:45666185-45681495	chr19:45678995-45683995	561.659	-0.0664327	0.905987	FALSE	621.743	0.0658484	0.868565	FALSE	54.9878	-0.604196	0.525718	FALSE	48.1362	0.283332	0.750349	FALSE	196.605	-0.230458	0.31104	FALSE	8.83967	0.594685	NA	FALSE	465.926	-0.779137	0.0546043	FALSE	45.163	-0.253283	0.999947	FALSE	327.778	-0.043795	0.999981	FALSE	13.3766	-0.154172	NA	FALSE	551.897	0.229829	0.972714	FALSE
ENSG00000007264	MATK	chr19:3777970-3802127	chr19:3799627-3804627	7.24479	0.421857	0.703278	FALSE	16.7271	-1.46668	0.0686458	FALSE	45.2298	-0.00931024	0.999234	FALSE	738.169	0.00703546	0.991001	FALSE	44.2608	-0.231959	0.499672	FALSE	231.405	-0.102656	0.857338	FALSE	18.0985	0.387181	0.58023	FALSE	674.783	0.010433	0.999947	FALSE	80.7886	0.0851208	0.999981	FALSE	270.504	-0.330185	0.999877	FALSE	7.79329	0.125869	NA	FALSE
ENSG00000007306	CEACAM7	chr19:42177234-42210895	chr19:42208395-42213395	0.22393	0.859687	NA	FALSE	0.509979	1.21411	NA	FALSE	0.280564	-1.61668	NA	FALSE	1846.29	-0.586466	0.364108	FALSE	18.6435	0.172484	NA	FALSE	251.23	-0.964626	0.0299168	FALSE	14.1312	0.00536476	NA	FALSE	649.078	-0.245985	0.999947	FALSE	86.6664	0.107359	0.999981	FALSE	129.249	-0.561502	0.978768	FALSE	8.34292	-0.151648	NA	FALSE
ENSG00000007312	CD79B	chr17:62006099-62009714	chr17:62007214-62012214	6.75412	0.702811	0.503802	FALSE	5.76932	-0.75716	0.620221	FALSE	1.75015	0.688304	NA	FALSE	40.5677	0.513614	0.485886	FALSE	30.4956	-0.273838	0.417978	FALSE	148.78	0.722533	0.0723267	FALSE	18.0737	0.212215	0.780863	FALSE	21.4182	0.0981068	0.999947	FALSE	39.2176	0.0092435	NA	FALSE	67.0921	-0.150799	0.999877	FALSE	10.8563	0.233809	NA	FALSE
ENSG00000007314	SCN4A	chr17:62015913-62050278	chr17:62047778-62052778	1.93351	0.307765	0.884078	FALSE	2.27534	2.24912	0.124646	FALSE	8.67474	-0.284142	0.934892	FALSE	1001.56	0.503573	0.265329	FALSE	149.365	-0.705074	0.00449654	TRUE	54.1942	0.410977	0.556725	FALSE	41.9718	0.794093	0.138084	FALSE	423.739	0.0652496	0.999947	FALSE	297.35	-0.0413365	0.999981	FALSE	26.0342	-0.184413	0.999877	FALSE	40.4505	0.233206	0.977023	FALSE
ENSG00000007341	ST7L	chr1:113066139-113163447	chr1:113160947-113165947	1461.99	0.239258	0.124791	FALSE	1386.84	0.188538	0.134852	FALSE	1243.06	0.0595145	0.905125	FALSE	125.023	0.493953	0.524592	FALSE	2976.16	0.309979	0.00598291	FALSE	8.17943	0.53985	NA	FALSE	574.546	-0.326797	0.477362	FALSE	187.24	0.218508	0.999947	FALSE	5041.51	-0.0148145	0.999981	FALSE	13.106	-0.264493	NA	FALSE	580.476	0.0752208	0.986935	FALSE
ENSG00000007350	TKTL1	chrX:153524023-153558700	chrX:153521523-153526523	3.39631	-2.00817	0.186509	FALSE	3.88692	-0.823093	0.599577	FALSE	9.74157	-1.13115	0.56161	FALSE	724.088	0.424082	0.370519	FALSE	92.5638	-0.175664	0.576254	FALSE	63.5892	0.350744	0.542855	FALSE	6.66376	0.282591	NA	FALSE	275.639	-0.0661448	0.999947	FALSE	191.292	-0.0287809	0.999981	FALSE	42.0721	0.00210457	0.999877	FALSE	4.47795	0.168719	NA	FALSE
ENSG00000007372	PAX6	chr11:31806339-31839509	chr11:31837009-31842009	148.454	-1.63029	0.000666938	TRUE	378.846	0.423318	0.382451	FALSE	643.56	-0.693185	0.449537	FALSE	1679.74	1.25455	0.00129789	TRUE	348.13	-0.791182	0.00348908	TRUE	261.477	0.957807	0.0395758	FALSE	16.7349	0.000404952	NA	FALSE	900.27	-0.23412	0.999947	FALSE	800.732	0.134802	0.999981	FALSE	248.421	-0.217131	0.999877	FALSE	9.26151	0.384259	NA	FALSE
ENSG00000007376	RPUSD1	chr16:834973-838397	chr16:835897-840897	1688.17	-0.1766	0.534837	FALSE	2033.61	0.125819	0.17325	FALSE	4002.66	0.487986	0.00209382	FALSE	5.48946	0.203185	0.844471	FALSE	140.925	0.0432424	0.892883	FALSE	7.59234	0.466708	NA	FALSE	134.691	-0.311238	0.471496	FALSE	8.86554	0.0344764	NA	FALSE	211.864	0.055429	0.999981	FALSE	14.9531	-0.032544	NA	FALSE	224.922	0.46415	0.70842	FALSE
ENSG00000007384	RHBDF1	chr16:108057-126354	chr16:123854-128854	5328.33	0.417229	0.0650729	FALSE	3974.75	0.230193	0.457703	FALSE	4235.56	0.000651353	0.999509	FALSE	25.6496	0.476409	0.597002	FALSE	716.682	0.156145	0.485705	FALSE	9.59024	0.411376	NA	FALSE	499.37	-0.00395141	0.993337	FALSE	34.6177	-0.107508	0.999947	FALSE	1000.84	0.148471	0.999981	FALSE	19.3671	-0.438125	NA	FALSE	789.811	0.226873	0.971746	FALSE
ENSG00000007392	LUC7L	chr16:238967-279462	chr16:276962-281962	3963.63	0.377648	0.0931075	FALSE	2848.12	0.245735	0.247012	FALSE	1177.44	-0.180369	0.798994	FALSE	50.7538	0.625339	0.485573	FALSE	1652.17	0.203211	0.0765096	FALSE	13.2017	0.213962	NA	FALSE	271.655	-0.113058	0.840509	FALSE	58.0504	0.0105697	0.999947	FALSE	2174.12	-0.0301406	0.999981	FALSE	22.8119	-0.0594126	NA	FALSE	332.973	0.239863	0.961845	FALSE
ENSG00000007402	CACNA2D2	chr3:50400232-50541675	chr3:50539175-50544175	101.175	0.474239	0.143803	FALSE	51.3259	0.60973	0.135364	FALSE	43.4926	0.528612	0.637183	FALSE	5393	0.483173	0.303172	FALSE	692.987	-0.708721	0.00474265	TRUE	495.345	0.421955	0.319233	FALSE	16.1953	-0.505297	NA	FALSE	2730.14	0.128738	0.999947	FALSE	859.913	-0.187411	0.999981	FALSE	333.825	-0.26542	0.999877	FALSE	11.5678	0.361835	NA	FALSE
ENSG00000007516	BAIAP3	chr16:1383601-1399439	chr16:1381101-1386101	1026.3	0.521823	0.120395	FALSE	1022.5	0.224975	0.0503571	FALSE	756.851	0.176565	0.670264	FALSE	247.751	0.19285	0.74155	FALSE	175.823	0.191224	0.495088	FALSE	174.027	0.211174	0.711093	FALSE	221.022	0.478258	0.299443	FALSE	390.963	-0.0955847	0.999947	FALSE	276.035	0.296279	0.999981	FALSE	295.96	-0.226643	0.999877	FALSE	205.787	0.0593659	0.988499	FALSE
ENSG00000007520	TSR3	chr16:1399240-1401912	chr16:1399412-1404412	2936.96	-0.311403	0.500298	FALSE	4603.71	0.215653	0.00421598	FALSE	2298.9	0.168247	0.496916	FALSE	5.62099	0.0887718	0.937621	FALSE	94.3523	0.129809	0.681639	FALSE	8.34897	0.179788	NA	FALSE	143.769	-0.250681	0.562109	FALSE	6.8445	-0.10577	NA	FALSE	134.031	0.225575	0.999981	FALSE	10.7722	0.0528663	NA	FALSE	294.673	0.324295	0.907883	FALSE
ENSG00000007541	PIGQ	chr16:616994-634136	chr16:614494-619494	3237.89	0.0995128	0.719906	FALSE	3016.06	0.0341421	0.843996	FALSE	3487.34	0.0160082	0.985973	FALSE	20.4414	0.312737	0.733816	FALSE	526.807	0.0796686	0.722925	FALSE	15.8375	0.220537	0.818128	FALSE	73.8249	0.0319611	0.958351	FALSE	31.2837	-0.0017678	0.999947	FALSE	690.4	0.190703	0.999981	FALSE	23.572	0.339369	0.999877	FALSE	53.5335	0.0918894	0.986935	FALSE
ENSG00000007545	CRAMP1L	chr16:1662325-1727909	chr16:1659825-1664825	1805.81	0.0204821	0.950131	FALSE	1976.42	0.203202	0.00722068	FALSE	3299.5	-0.105737	0.772239	FALSE	76.4683	0.504208	0.545776	FALSE	2833.81	0.117524	0.485249	FALSE	6.09584	0.694343	NA	FALSE	523.62	-0.130729	0.802912	FALSE	101.019	-0.0530886	0.999947	FALSE	3452.16	-0.0872921	0.999981	FALSE	21.1642	-0.36698	NA	FALSE	834.402	0.279225	0.932956	FALSE
ENSG00000007866	TEAD3	chr6:35441373-35464853	chr6:35462353-35467353	2578.05	-1.01178	4.27058e-06	TRUE	1537.3	-0.215761	0.0690472	FALSE	6083.18	-0.103173	0.616355	FALSE	28.8799	0.647424	0.477513	FALSE	806.434	-0.0327828	0.899652	FALSE	14.1585	0.52434	NA	FALSE	574.972	-0.237907	0.5178	FALSE	49.1595	-0.246114	0.999947	FALSE	1266.06	0.00424903	0.999981	FALSE	20.9239	-0.4377	NA	FALSE	1023.86	0.184808	0.977023	FALSE
ENSG00000007908	SELE	chr1:169691780-169733846	chr1:169731346-169736346	0.669129	-1.32965	NA	FALSE	1.96186	-3.20421	0.146462	FALSE	1.80665	-0.91755	NA	FALSE	3441.51	0.259695	0.580637	FALSE	58.8928	-0.0308558	0.941014	FALSE	319.165	-0.387818	0.373158	FALSE	11.0421	0.375753	NA	FALSE	968.668	0.30913	0.999947	FALSE	179.794	0.300941	0.999981	FALSE	91.3333	0.272197	0.999877	FALSE	5.14173	0.0367245	NA	FALSE
ENSG00000007923	DNAJC11	chr1:6694227-6761984	chr1:6759484-6764484	4443.38	-0.190336	0.232648	FALSE	4121.95	0.251776	1.05023e-05	FALSE	4923.54	0.225425	0.0640881	FALSE	78.274	0.380641	0.642501	FALSE	2184.87	0.121236	0.368677	FALSE	15.2177	0.996112	0.176094	FALSE	202.255	-0.255575	0.57097	FALSE	98.0968	0.0950452	0.999947	FALSE	2725.11	-0.0662207	0.999981	FALSE	12.1493	-0.074882	NA	FALSE	289.376	0.238318	0.963033	FALSE
ENSG00000007933	FMO3	chr1:171060017-171086959	chr1:171057517-171062517	1282.29	-3.4114	2.19906e-08	TRUE	954.969	-2.1952	1.17432e-08	TRUE	384.124	-0.543619	0.787888	FALSE	406.992	3.36958	1.29671e-19	TRUE	291.374	-1.04637	9.97231e-05	TRUE	53.2383	2.08631	2.16426e-05	TRUE	38.4125	-0.763138	0.183182	FALSE	204.837	0.70125	0.999947	FALSE	323.179	-0.771139	0.158763	FALSE	35.1708	0.548615	0.999877	FALSE	19.6505	-0.314989	0.942191	FALSE
ENSG00000007944	MYLIP	chr6:16129355-16148479	chr6:16126855-16131855	916.853	-0.185609	0.5962	FALSE	496.323	-0.792989	0.0314023	FALSE	6.14522	-1.28528	0.755493	FALSE	44.2285	0.347852	0.673625	FALSE	536.645	0.131252	0.43561	FALSE	152.252	1.22283	0.00761604	TRUE	259.169	-0.326672	0.452297	FALSE	58.7485	0.263493	0.999947	FALSE	926.551	-0.163496	0.999981	FALSE	87.4106	-0.087994	0.999877	FALSE	249.031	0.193294	0.977409	FALSE
ENSG00000007952	NOX1	chrX:100098312-100129334	chrX:100126834-100131834	31.2805	-0.382548	0.391555	FALSE	10.5093	-0.280874	0.684808	FALSE	17.8848	-0.957156	0.247607	FALSE	245.66	0.795282	0.0605497	FALSE	102.018	-0.17732	0.5375	FALSE	34.9617	1.79651	0.000809319	TRUE	36.9637	-1.70569	0.000147808	TRUE	198.934	0.306306	0.999947	FALSE	149.011	-0.184743	0.999981	FALSE	43.0946	0.369854	0.999877	FALSE	4.45988	-0.125406	NA	FALSE
ENSG00000007968	E2F2	chr1:23832921-23857712	chr1:23855212-23860212	780.148	-0.240846	0.703146	FALSE	436.507	0.516269	1.64057e-08	FALSE	748.722	-0.39219	0.618993	FALSE	39.3772	0.29214	0.716372	FALSE	724.716	0.29901	0.121952	FALSE	13.9145	0.0783631	NA	FALSE	97.6216	0.235667	0.656618	FALSE	65.7375	-0.218771	0.999947	FALSE	774.065	0.237061	0.999981	FALSE	28.3482	-0.289181	0.999877	FALSE	136.93	1.03624	0.0267347	TRUE
ENSG00000008018	PSMB1	chr6:170844204-170862429	chr6:170859929-170864929	10233.1	-0.222258	0.503244	FALSE	10817.9	0.290084	0.0701007	FALSE	6539.9	0.0583892	0.932615	FALSE	27.2031	0.294544	0.755129	FALSE	826.716	0.333223	0.0358616	FALSE	6.47205	0.235882	NA	FALSE	382.02	-0.205176	0.694199	FALSE	38.018	0.0313407	0.999947	FALSE	1270.42	-0.107566	0.999981	FALSE	13.7426	-0.082683	NA	FALSE	368.085	0.0558097	0.989437	FALSE
ENSG00000008056	SYN1	chrX:47431302-47479252	chrX:47476752-47481752	17.3262	0.0798479	0.914075	FALSE	8.09202	-0.357163	0.637426	FALSE	43.5962	2.49789	0.00180376	FALSE	719.926	0.342674	0.50173	FALSE	225.947	-0.0676903	0.794681	FALSE	89.5257	-0.215643	0.718346	FALSE	11.3065	0.280175	NA	FALSE	321.217	0.0194565	0.999947	FALSE	395.372	0.0536422	0.999981	FALSE	56.6011	0.0301245	0.999877	FALSE	12.6605	0.0960079	NA	FALSE
ENSG00000008083	JARID2	chr6:15246526-15522252	chr6:15244026-15249026	1696.98	-0.617194	0.000415726	FALSE	1355.62	0.391438	0.00282413	FALSE	2139.54	-0.250596	0.567317	FALSE	503.391	0.503853	0.489556	FALSE	5329.17	0.0831401	0.515849	FALSE	8.73079	0.361527	NA	FALSE	612.574	-0.564847	0.178945	FALSE	533.064	0.0265603	0.999947	FALSE	8050.98	-0.114312	0.999981	FALSE	22.4323	-0.442057	NA	FALSE	874.013	0.272698	0.924689	FALSE
ENSG00000008086	CDKL5	chrX:18443702-18671749	chrX:18441202-18446202	344.857	-0.462699	0.286023	FALSE	251.252	-0.122176	0.421691	FALSE	1054.19	-0.548943	0.0948537	FALSE	548.804	0.88726	0.0252772	FALSE	1709	-0.318981	0.00993034	FALSE	7.59233	0.413208	NA	FALSE	88.8099	0.0914281	0.879565	FALSE	544.636	-0.152132	0.999947	FALSE	2682.68	0.0253981	0.999981	FALSE	14.0298	-0.23969	NA	FALSE	107.873	0.259025	0.967281	FALSE
ENSG00000008118	CAMK1G	chr1:209757061-209787283	chr1:209754561-209759561	19.8239	4.2362	1.92023e-06	FALSE	8.98657	0.147859	0.940301	FALSE	8.1751	-1.32158	0.452166	FALSE	546.66	-1.804	7.00295e-08	TRUE	260.748	0.63302	0.00400462	TRUE	130.156	-1.39987	0.000294287	TRUE	25.8716	0.772353	0.206188	FALSE	226.149	0.00162273	0.999947	FALSE	465.989	-0.0789403	0.999981	FALSE	71.2911	-0.013607	0.999877	FALSE	6.99222	-0.117017	NA	FALSE
ENSG00000008128	CDK11A	chr1:1634168-1655766	chr1:1653266-1658266	2131.41	0.18715	0.489891	FALSE	1323.52	0.0068066	0.97494	FALSE	938.339	0.0808204	0.841093	FALSE	7.39173	0.414275	0.675537	FALSE	329.705	0.134998	0.509107	FALSE	1.96226	0.416695	NA	FALSE	102.825	-0.33299	0.498729	FALSE	8.62752	-0.240613	NA	FALSE	362.585	-0.213241	0.999981	FALSE	1.49315	-0.049358	NA	FALSE	75.6494	0.0344275	0.995382	FALSE
ENSG00000008130	NADK	chr1:1682670-1711896	chr1:1709396-1714396	4017.59	-0.380275	0.00390781	FALSE	3273.19	-0.114633	0.138233	FALSE	5683.34	0.110701	0.839733	FALSE	36.2249	0.392524	0.670239	FALSE	1019.5	0.0789131	0.685442	FALSE	8.19787	0.583106	NA	FALSE	238.132	-0.193281	0.651942	FALSE	52.8304	-0.0141315	0.999947	FALSE	1368.02	-0.0283538	0.999981	FALSE	14.6804	-0.244156	NA	FALSE	351.768	0.245703	0.972714	FALSE
ENSG00000008196	TFAP2B	chr6:50786435-50815326	chr6:50783935-50788935	4.18226	1.30551	0.507087	FALSE	2.72741	-2.75285	0.0650583	FALSE	19.0225	-1.99601	0.399199	FALSE	3162.81	0.96381	0.235913	FALSE	83.5875	-0.889702	0.00202866	TRUE	637.622	0.76819	0.413487	FALSE	29.5687	-0.067773	0.934758	FALSE	1299.46	0.171364	0.999947	FALSE	221.481	-0.494365	0.91014	FALSE	314.94	0.112744	0.999877	FALSE	13.9887	-0.0951975	NA	FALSE
ENSG00000008197	TFAP2D	chr6:50681540-50740701	chr6:50679040-50684040	0.315099	-0.1522	NA	FALSE	0.212071	1.21724	NA	FALSE	0.629292	2.82545	NA	FALSE	2558.52	-1.09763	0.027433	TRUE	30.8764	0.280833	0.409843	FALSE	649.81	-0.193485	0.7164	FALSE	12.9065	0.0921961	NA	FALSE	868.779	-0.00751863	0.999947	FALSE	151.219	0.369003	0.999981	FALSE	235.019	-0.104546	0.999877	FALSE	3.07888	0.0290305	NA	FALSE
ENSG00000008226	DLEC1	chr3:38080695-38165516	chr3:38078195-38083195	568.694	-0.58696	0.00194425	FALSE	575.537	0.083629	0.783134	FALSE	552.695	0.051028	0.950264	FALSE	2753.36	0.819201	0.0331317	FALSE	574.549	-0.409199	0.0387336	FALSE	127.831	1.01256	0.0163764	TRUE	15.837	0.286123	NA	FALSE	1620.68	0.0908962	0.999947	FALSE	632.03	0.0132104	0.999981	FALSE	107.815	0.13202	0.999877	FALSE	5.62527	0.130634	NA	FALSE
ENSG00000008256	CYTH3	chr7:6201406-6312275	chr7:6309775-6314775	7156.42	-1.36074	0.000104824	TRUE	15314.2	1.30063	6.27343e-07	TRUE	16201.1	-0.75629	1.90118e-09	FALSE	146.659	0.615152	0.434528	FALSE	2832.69	-0.031473	0.855301	FALSE	12.5413	1.01844	NA	FALSE	332.62	-0.564819	0.173361	FALSE	298.068	0.584611	0.999947	FALSE	6845.62	0.553442	0.620029	FALSE	24.5027	0.0815156	0.999877	FALSE	744.413	0.764725	0.12628	FALSE
ENSG00000008277	ADAM22	chr7:87563457-87832204	chr7:87560957-87565957	222.665	2.5357	2.21437e-09	TRUE	82.9942	0.643667	0.288262	FALSE	196.185	-0.0306101	0.990785	FALSE	8239.3	-1.55874	0.00724311	TRUE	1012.68	0.149128	0.603278	FALSE	219.906	-1.19761	0.0213897	TRUE	27.2085	0.434927	0.522346	FALSE	2096.48	-0.321528	0.999947	FALSE	1503.05	0.0145822	0.999981	FALSE	138.278	-0.377053	0.999877	FALSE	24.0084	0.429835	0.861433	FALSE
ENSG00000008282	SYPL1	chr7:105730948-105753022	chr7:105750522-105755522	4531.16	-0.139023	0.654439	FALSE	4093.48	-0.228979	0.304874	FALSE	16056.5	0.162609	0.720579	FALSE	34.917	0.400259	0.624409	FALSE	641.371	0.358096	0.0147983	FALSE	13.6001	-0.0565522	NA	FALSE	354.169	-0.467886	0.224642	FALSE	58.4718	0.152042	0.999947	FALSE	1161.42	-0.0397406	0.999981	FALSE	20.8939	-0.106782	NA	FALSE	698.519	0.0318518	0.994735	FALSE
ENSG00000008283	CYB561	chr17:61509664-61523739	chr17:61521239-61526239	4138.72	0.711292	0.0237899	FALSE	2632.5	0.190308	0.512061	FALSE	1916.36	0.765582	0.000351785	FALSE	25.2472	-0.0274101	0.978104	FALSE	370.6	0.501266	0.00276223	FALSE	10.1085	-0.526781	NA	FALSE	486.477	0.78781	0.0283292	FALSE	41.1423	-0.0331016	0.999947	FALSE	576.716	0.158473	0.999981	FALSE	18.1983	-0.419186	NA	FALSE	600.384	0.462302	0.687776	FALSE
ENSG00000008294	SPAG9	chr17:49039534-49198226	chr17:49195726-49200726	19497.8	-0.00764294	0.984718	FALSE	21357	-0.0158706	0.965326	FALSE	22479.8	-0.258394	0.158899	FALSE	195.725	0.71649	0.338653	FALSE	4615.65	0.187807	0.144358	FALSE	7.53626	0.59394	NA	FALSE	732.053	-0.304145	0.514227	FALSE	265.748	0.133583	0.999947	FALSE	8270.64	-0.120588	0.999981	FALSE	16.6258	-0.443854	NA	FALSE	992.573	0.066698	0.986935	FALSE
ENSG00000008300	CELSR3	chr3:48673901-48700348	chr3:48697848-48702848	1042.06	-1.19776	0.00601381	TRUE	659.152	-0.0250705	0.988027	FALSE	1080.24	-1.91378	0.279149	FALSE	305.699	1.02178	0.17374	FALSE	368.779	-0.606276	0.0304478	TRUE	64.8204	0.512169	0.61789	FALSE	194.467	-2.08531	2.12078e-09	TRUE	260.641	-0.0229294	0.999947	FALSE	462.711	-0.27696	0.999981	FALSE	127.527	-0.339191	0.999877	FALSE	143.548	0.0358024	0.990605	FALSE
ENSG00000008311	AASS	chr7:121715700-121784334	chr7:121781834-121786834	2463.05	-0.384563	0.156065	FALSE	2444.96	0.702482	0.000127401	FALSE	996.126	-0.591798	0.308496	FALSE	105.783	0.51172	0.511308	FALSE	1611.3	-0.238395	0.0507632	FALSE	12.3385	0.00249591	NA	FALSE	177.914	-0.338721	0.440054	FALSE	135.214	0.139017	0.999947	FALSE	2721.68	0.200534	0.999981	FALSE	13.6359	-0.104714	NA	FALSE	265.18	0.302968	0.927999	FALSE
ENSG00000008323	PLEKHG6	chr12:6419601-6437672	chr12:6417101-6422101	93.3953	1.58767	3.0034e-05	TRUE	86.8437	0.320125	0.528196	FALSE	84.2281	0.254032	0.875767	FALSE	132.04	0.232644	0.706808	FALSE	390.323	0.218112	0.22371	FALSE	81.3735	0.72158	0.130866	FALSE	26.6534	0.305412	0.671069	FALSE	168.279	0.228878	0.999947	FALSE	1188.44	0.635869	0.415417	FALSE	111.879	0.585351	0.942836	FALSE	39.5409	0.907453	0.10825	FALSE
ENSG00000008324	SS18L2	chr3:42623331-42636606	chr3:42620831-42625831	832.866	-0.0580163	0.89054	FALSE	760.568	0.124471	0.546541	FALSE	938.364	0.101179	0.847121	FALSE	26.6038	0.0306672	0.976752	FALSE	245.178	0.342689	0.0932435	FALSE	9.50015	-0.059991	NA	FALSE	205.453	-0.252903	0.566059	FALSE	33.227	-0.0357503	0.999947	FALSE	310.351	0.0691896	0.999981	FALSE	14.4548	0.107875	NA	FALSE	255.509	0.361381	0.876726	FALSE
ENSG00000008382	MPND	chr19:4343523-4360083	chr19:4341023-4346023	530.716	-0.302371	0.275544	FALSE	664.677	0.271189	0.190765	FALSE	495.956	-0.26874	0.437124	FALSE	21.7765	0.0708486	0.945838	FALSE	422.397	0.215147	0.327341	FALSE	9.37727	0.338461	NA	FALSE	193.176	-0.479283	0.215227	FALSE	22.4324	-0.33935	0.999947	FALSE	619.68	0.110281	0.999981	FALSE	14.3545	-0.64475	NA	FALSE	235.453	0.446029	0.726822	FALSE
ENSG00000008394	MGST1	chr12:16500075-16762193	chr12:16497575-16502575	1275.32	0.149328	0.794155	FALSE	1851.29	2.73103	1.28435e-15	TRUE	209.088	-1.84744	0.00395689	TRUE	3063.85	0.0384076	0.970375	FALSE	1969.93	-0.676472	0.0220591	TRUE	23.8414	1.77029	0.00458931	FALSE	97.8346	0.594471	0.255629	FALSE	1638.16	0.323897	0.999947	FALSE	8380.02	0.80412	0.0889159	FALSE	17.0202	0.342921	NA	FALSE	172.706	0.646093	0.447818	FALSE
ENSG00000008405	CRY1	chr12:107385141-107487607	chr12:107485107-107490107	3549.17	-1.3058	4.63468e-07	TRUE	3094.55	0.533297	3.35264e-08	FALSE	1909.98	-0.495318	0.318888	FALSE	175.437	0.591118	0.458403	FALSE	1760.98	-0.228039	0.113289	FALSE	7.53875	0.0445978	NA	FALSE	763.1	-0.230217	0.59571	FALSE	209.097	0.0733752	0.999947	FALSE	2814.54	0.112197	0.999981	FALSE	13.362	-0.291086	NA	FALSE	806.45	0.303215	0.919173	FALSE
ENSG00000008438	PGLYRP1	chr19:46522410-46526323	chr19:46523823-46528823	16.7554	0.0106708	0.992458	FALSE	20.5699	-0.00582337	0.994906	FALSE	10.4161	0.189444	0.946878	FALSE	32.0354	0.731804	0.393424	FALSE	88.1174	-0.261174	0.406655	FALSE	59.4292	0.679007	0.307416	FALSE	15.7667	-0.00540681	NA	FALSE	13.9047	-0.109923	0.999947	FALSE	125.796	-0.108321	0.999981	FALSE	18.4529	-0.0626778	NA	FALSE	8.093	0.15165	NA	FALSE
ENSG00000008441	NFIX	chr19:13106421-13209610	chr19:13103921-13108921	2709.83	0.77401	0.0103049	FALSE	2172.71	-0.336956	0.001034	FALSE	14184.3	-0.123671	0.865624	FALSE	147.607	0.550427	0.473648	FALSE	3504.24	0.266372	0.042206	FALSE	11.4415	0.818523	NA	FALSE	177.897	-0.557658	0.233628	FALSE	206.856	-0.0897877	0.999947	FALSE	4567.56	-0.123462	0.999981	FALSE	16.6102	-0.224858	NA	FALSE	291.385	0.150541	0.986171	FALSE
ENSG00000008513	ST3GAL1	chr8:134467090-134584183	chr8:134581683-134586683	2066.15	0.943308	2.6264e-10	FALSE	1847.05	-0.570837	0.00173987	FALSE	5085.5	0.282117	0.290537	FALSE	209.939	0.0629641	0.935756	FALSE	2993.83	0.089452	0.521225	FALSE	9.41371	0.175084	NA	FALSE	501.006	-0.307047	0.516812	FALSE	202.217	-0.0975267	0.999947	FALSE	4023.5	-0.43696	0.965291	FALSE	19.3872	-0.546961	NA	FALSE	679.322	-0.133201	0.986935	FALSE
ENSG00000008516	MMP25	chr16:3096681-3110727	chr16:3094181-3099181	206.668	1.4305	0.000498125	TRUE	80.7331	-0.0869641	0.833764	FALSE	73.1317	-0.144469	0.891217	FALSE	85.7086	0.702853	0.240232	FALSE	152.651	-0.00894908	0.980834	FALSE	67.5072	0.350307	0.61681	FALSE	51.3692	-0.167973	0.81269	FALSE	238.113	-0.561946	0.999947	FALSE	242.611	0.149105	0.999981	FALSE	373.09	-0.546755	0.999877	FALSE	19.8259	0.850874	0.106301	FALSE
ENSG00000008517	IL32	chr16:3115297-3131908	chr16:3112797-3117797	477.35	0.102509	0.878849	FALSE	88.6554	0.235172	0.891586	FALSE	1711.44	0.278228	0.862345	FALSE	495.46	0.912188	0.0188135	FALSE	109.024	-0.330692	0.281214	FALSE	24.7257	1.26242	0.0338771	FALSE	143.774	-0.334645	0.51039	FALSE	312.506	-0.163687	0.999947	FALSE	119.514	0.129197	0.999981	FALSE	39.0272	-0.0144307	0.999877	FALSE	66.1882	0.221231	0.951685	FALSE
ENSG00000008710	PKD1	chr16:2138710-2185899	chr16:2183399-2188399	21573	-0.279628	0.564111	FALSE	15511.9	0.0232926	0.893966	FALSE	10722.2	-0.23981	0.466429	FALSE	19.2469	0.684026	0.45229	FALSE	865.838	-0.0726828	0.726045	FALSE	2.8609	-0.0917633	NA	FALSE	51.1547	-0.431886	0.517172	FALSE	27.8825	-0.0427988	0.999947	FALSE	1109.69	0.176369	0.999981	FALSE	3.29149	-0.00533103	NA	FALSE	51.4739	0.379421	0.915505	FALSE
ENSG00000008735	MAPK8IP2	chr22:51039113-51052409	chr22:51036613-51041613	129.953	-2.23578	0.00043267	TRUE	129.014	-1.57973	1.64228e-23	TRUE	129.101	1.98418	0.00175029	TRUE	1270.04	0.236762	0.69023	FALSE	51.8624	-0.421836	0.180785	FALSE	369.688	0.261069	0.64511	FALSE	17.2866	-0.0459833	0.95682	FALSE	811.164	0.0166981	0.999947	FALSE	73.4526	-0.0787994	0.999981	FALSE	314.848	-0.318459	0.999877	FALSE	15.3507	0.221062	0.977023	FALSE
ENSG00000008838	MED24	chr17:38175349-38217468	chr17:38214968-38219968	3292.72	-0.230141	0.221927	FALSE	3113.25	-0.0292294	0.847867	FALSE	5866.73	-0.109554	0.839537	FALSE	102.354	0.931604	0.133728	FALSE	1249.75	0.0614315	0.702717	FALSE	40.4847	0.854514	0.13049	FALSE	101.449	-0.479723	0.273237	FALSE	72.0749	0.111267	0.999947	FALSE	1763.58	-0.110059	0.999981	FALSE	25.5911	-0.0274189	0.999877	FALSE	221.828	0.109957	0.986935	FALSE
ENSG00000008853	RHOBTB2	chr8:22844929-22877712	chr8:22842429-22847429	2628.23	-0.00462447	0.985599	FALSE	2880.48	-0.107159	0.213036	FALSE	6401.13	-0.0346862	0.932615	FALSE	149.333	0.469892	0.428167	FALSE	983.583	0.1183	0.429422	FALSE	22.472	0.872244	0.189725	FALSE	149.706	-0.53123	0.268264	FALSE	80.7211	-0.365458	0.999947	FALSE	1372.98	-0.147054	0.999981	FALSE	10.0136	-0.403679	NA	FALSE	100.992	0.0660322	0.988276	FALSE
ENSG00000008869	HEATR5B	chr2:37195525-37311485	chr2:37308985-37313985	3762.99	-0.0585353	0.795694	FALSE	2857.25	0.0834888	0.348478	FALSE	4134.9	-0.324544	0.0762453	FALSE	178.219	0.400364	0.585716	FALSE	3613.35	0.118577	0.343875	FALSE	7.63189	0.307729	NA	FALSE	129.595	0.272245	0.547379	FALSE	217.092	0.284462	0.999947	FALSE	6094.69	-0.0536787	0.999981	FALSE	9.88702	-0.00868036	NA	FALSE	199.091	0.411359	0.843541	FALSE
ENSG00000008952	SEC62	chr3:169684422-169716161	chr3:169681922-169686922	8120.94	-0.597914	0.000924848	FALSE	6449.43	-0.0554687	0.793458	FALSE	7511.37	-0.231161	0.184893	FALSE	46.5664	0.420452	0.599631	FALSE	1191.26	0.195875	0.180852	FALSE	41.2992	0.721694	0.23991	FALSE	250.566	-0.336602	0.421633	FALSE	61.4274	0.0110184	0.999947	FALSE	2029.32	-0.0144082	0.999981	FALSE	20.5022	-0.115496	NA	FALSE	341.546	0.0999174	0.986935	FALSE
ENSG00000008988	RPS20	chr8:56979853-56987069	chr8:56984569-56989569	35230.6	0.155788	0.753663	FALSE	33112.2	0.215516	0.271775	FALSE	20207.7	-0.0862247	0.863212	FALSE	10.476	0.339596	0.722258	FALSE	236.161	0.0983709	0.677031	FALSE	10.3764	0.452117	NA	FALSE	202.263	-0.0520749	0.933952	FALSE	17.9729	-0.153481	0.999947	FALSE	460.383	-0.172981	0.999981	FALSE	15.9073	0.0195321	NA	FALSE	242.745	0.0986222	0.986935	FALSE
ENSG00000009307	CSDE1	chr1:115259533-115301297	chr1:115298797-115303797	47505.1	-0.175686	0.268323	FALSE	37930.5	0.0354357	0.841575	FALSE	43865.4	-0.166303	0.557693	FALSE	52.4933	0.774869	0.384944	FALSE	1785.17	0.306433	0.0216558	FALSE	21.6136	0.183327	0.83564	FALSE	410.002	-0.24142	0.595691	FALSE	86.0587	-3.9489e-05	0.999964	FALSE	3031.78	-0.0807502	0.999981	FALSE	21.9291	-0.309377	NA	FALSE	344.733	-0.0965528	0.986935	FALSE
ENSG00000009335	UBE3C	chr7:156931606-157062066	chr7:156929106-156934106	12079.3	-0.455073	0.000354538	FALSE	9040.73	-0.194624	0.132032	FALSE	16458.9	0.156209	0.368361	FALSE	168.334	0.610058	0.428768	FALSE	4788.07	0.229508	0.0171624	FALSE	9.99025	0.347409	NA	FALSE	252.197	-0.282889	0.54012	FALSE	194.997	-0.174983	0.999947	FALSE	6224.83	-0.258789	0.999981	FALSE	12.7439	-0.0563796	NA	FALSE	365.142	-0.0792995	0.986935	FALSE
ENSG00000009413	REV3L	chr6:111620233-111804918	chr6:111802418-111807418	5835.16	0.118129	0.704369	FALSE	4757.66	-0.180591	0.0308309	FALSE	13390.5	-0.426843	0.0442411	FALSE	259.964	0.489129	0.533758	FALSE	5382.2	0.25211	0.0258348	FALSE	7.8523	0.225222	NA	FALSE	843.988	-0.195334	0.631728	FALSE	382.983	0.274807	0.999947	FALSE	10592	-0.0472867	0.999981	FALSE	24.0381	-0.386878	0.999877	FALSE	1468.32	0.0986859	0.986935	FALSE
ENSG00000009694	TENM1	chrX:123509752-124097666	chrX:124095166-124100166	431.201	0.648439	0.168035	FALSE	2716.4	-1.17945	0.287988	FALSE	3514.99	-2.14834	0.152563	FALSE	3193.26	0.379667	0.542146	FALSE	1793.05	-0.790549	0.00191424	TRUE	15.929	-0.0650302	0.953837	FALSE	5.69775	0.365954	NA	FALSE	939.736	0.209314	0.999947	FALSE	6851.02	-0.122593	0.999981	FALSE	5.08123	-0.00246527	NA	FALSE	10.6009	-0.415091	NA	FALSE
ENSG00000009709	PAX7	chr1:18957499-19075360	chr1:18954999-18959999	2.90019	-2.10104	0.210598	FALSE	0.436288	-2.13362	NA	FALSE	5.73052	-0.447952	0.922758	FALSE	10092.3	0.360346	0.463266	FALSE	359.32	-0.693634	0.00223412	TRUE	1051.87	0.394728	0.349539	FALSE	17.2468	-0.136496	0.85731	FALSE	5086.17	-0.174819	0.999947	FALSE	570.552	-0.442137	0.999981	FALSE	468.432	-0.345516	0.999877	FALSE	5.91705	0.255391	NA	FALSE
ENSG00000009724	MASP2	chr1:11086579-11107290	chr1:11104790-11109790	159.728	0.658666	0.0412277	FALSE	70.9789	-0.225239	0.5556	FALSE	177.529	0.0229076	0.987623	FALSE	404.279	0.280993	0.60533	FALSE	218.167	-0.000467988	0.998837	FALSE	102.591	0.396195	0.504628	FALSE	11.7147	0.285533	NA	FALSE	225.524	-0.247149	0.999947	FALSE	372.377	-0.122347	0.999981	FALSE	54.2682	0.0554441	0.999877	FALSE	6.58113	0.123931	NA	FALSE
ENSG00000009765	IYD	chr6:150690027-150727105	chr6:150687527-150692527	47.6735	-1.14256	0.0147105	FALSE	21.9989	-0.681124	0.144752	FALSE	12.6164	-1.36879	0.209506	FALSE	920.423	1.2556	0.00380729	TRUE	251.165	-0.573256	0.0118917	FALSE	118.942	1.17794	0.00660171	TRUE	10.945	0.167613	NA	FALSE	427.894	-0.00243517	0.999947	FALSE	500.03	0.115143	0.999981	FALSE	51.7183	-0.00442019	0.999877	FALSE	8.36575	0.0420264	NA	FALSE
ENSG00000009780	FAM76A	chr1:28052489-28089633	chr1:28049989-28054989	779.557	-0.457977	0.0777894	FALSE	908.09	-0.192386	0.228417	FALSE	732.692	0.087063	0.923505	FALSE	54.8625	0.341361	0.668716	FALSE	1080.86	0.0702523	0.667403	FALSE	9.72344	0.641065	NA	FALSE	367.766	0.0193523	0.97296	FALSE	55.1967	0.103984	0.999947	FALSE	1670.54	-0.15877	0.999981	FALSE	14.0543	-0.156579	NA	FALSE	366.275	0.0976098	0.986935	FALSE
ENSG00000009790	TRAF3IP3	chr1:209929376-209955668	chr1:209926876-209931876	228.938	0.336356	0.224482	FALSE	217.968	0.434476	0.00136715	FALSE	241.658	0.325601	0.454665	FALSE	170.722	0.030063	0.968915	FALSE	412.141	0.152119	0.44242	FALSE	70.0795	-0.240014	0.691137	FALSE	14.9877	0.512886	NA	FALSE	109.244	0.435192	0.999947	FALSE	497.238	-0.174713	0.999981	FALSE	37.8143	0.287553	0.999877	FALSE	5.94941	-0.072183	NA	FALSE
ENSG00000009830	POMT2	chr14:77741298-77787227	chr14:77784727-77789727	3296.98	-0.413481	0.228362	FALSE	2537.2	0.101902	0.301097	FALSE	4642.77	-0.177061	0.603756	FALSE	59.3845	0.457216	0.593467	FALSE	1533.56	0.17621	0.179385	FALSE	6.85387	0.409961	NA	FALSE	453.328	-0.158028	0.688861	FALSE	84.7612	0.0350926	0.999947	FALSE	1976.02	-0.0537049	0.999981	FALSE	15.1692	-0.223185	NA	FALSE	613.275	0.256737	0.941325	FALSE
ENSG00000009844	VTA1	chr6:142468366-142545826	chr6:142465866-142470866	5868.18	0.0532672	0.887427	FALSE	3415.42	0.313924	0.004947	FALSE	7468.68	0.00451749	0.996297	FALSE	107.445	0.606007	0.424119	FALSE	2376.7	0.282865	0.0260352	FALSE	15.5348	-0.318651	0.734698	FALSE	138.702	0.468095	0.389309	FALSE	157.995	0.264074	0.999947	FALSE	4268.99	0.0551586	0.999981	FALSE	14.3228	-0.201842	NA	FALSE	99.8263	-0.137741	0.986935	FALSE
ENSG00000009950	MLXIPL	chr7:73007523-73038873	chr7:73036373-73041373	7.05359	0.796824	0.288579	FALSE	2.65696	-0.200252	0.929031	FALSE	19.1934	0.157232	0.961511	FALSE	424.73	0.290122	0.559784	FALSE	150.307	-0.193344	0.470787	FALSE	107.435	0.409192	0.438407	FALSE	18.7375	-0.099367	0.903847	FALSE	233.899	-0.0506146	0.999947	FALSE	284.405	0.0222515	0.999981	FALSE	78.9142	-0.0194739	0.999877	FALSE	9.54339	0.235544	NA	FALSE
ENSG00000009954	BAZ1B	chr7:72854727-72936608	chr7:72934108-72939108	11403.9	-0.119963	0.666399	FALSE	10354.8	-0.0256619	0.926048	FALSE	17161.5	-0.0613379	0.886828	FALSE	87.8401	0.734929	0.360432	FALSE	3511.22	0.300097	0.00280017	FALSE	5.38534	0.367383	NA	FALSE	310.434	-0.43778	0.313435	FALSE	122.778	0.190124	0.999947	FALSE	5200.86	-0.0440644	0.999981	FALSE	17.0091	-0.273578	NA	FALSE	633.047	0.328889	0.865064	FALSE
ENSG00000010017	RANBP9	chr6:13621729-13711796	chr6:13709296-13714296	4187.86	-0.669443	0.000846624	FALSE	5095.92	-0.119783	0.609434	FALSE	7148.71	-0.351512	0.193495	FALSE	136.416	0.417036	0.57174	FALSE	2338.74	0.214692	0.126276	FALSE	6.42126	0.325893	NA	FALSE	480.72	-0.609307	0.17259	FALSE	194.898	0.379581	0.999947	FALSE	4611.18	-0.0809179	0.999981	FALSE	19.247	-0.285123	NA	FALSE	1049.28	0.145774	0.977409	FALSE
ENSG00000010030	ETV7	chr6:36322418-36356164	chr6:36353664-36358664	23.3477	-0.611028	0.423025	FALSE	33.3151	-1.64723	0.00157625	FALSE	22.6159	-0.0346166	0.992087	FALSE	503.462	0.927197	0.0184147	FALSE	279.374	-0.504116	0.0172605	FALSE	38.5532	0.44986	0.470131	FALSE	106.644	0.229884	0.692046	FALSE	153.618	0.498437	0.999947	FALSE	1014.47	-0.378628	0.999981	FALSE	23.4369	0.0961366	NA	FALSE	130.31	0.233875	0.977023	FALSE
ENSG00000010072	SPRTN	chr1:231472849-231490769	chr1:231470349-231475349	1641.37	-0.625655	0.000484411	FALSE	1734.41	0.237202	0.18941	FALSE	1623.88	-0.0649253	0.771589	FALSE	27.8505	0.696564	0.468591	FALSE	576.658	0.109563	0.503169	FALSE	10.78	0.753082	NA	FALSE	366.117	-0.270103	0.60368	FALSE	33.2603	0.176549	0.999947	FALSE	828.988	0.0629585	0.999981	FALSE	12.4934	-0.236405	NA	FALSE	348.496	0.25633	0.951685	FALSE
ENSG00000010165	METTL13	chr1:171750787-171783163	chr1:171748287-171753287	3171.14	0.236058	0.52868	FALSE	3938.48	0.178543	0.513937	FALSE	4064.22	0.270514	0.365284	FALSE	80.3608	0.169816	0.81758	FALSE	991.773	0.295711	0.0258221	FALSE	6.32295	-0.0547378	NA	FALSE	166.836	-0.240465	0.588492	FALSE	67.8964	0.020578	0.999947	FALSE	1312.89	-0.0877422	0.999981	FALSE	7.50837	-0.078818	NA	FALSE	126.601	0.155971	0.983767	FALSE
ENSG00000010219	DYRK4	chr12:4671369-4723325	chr12:4668869-4673869	973.502	-0.250427	0.403381	FALSE	940.869	0.495098	0.0597998	FALSE	664.638	-0.101855	0.860294	FALSE	2728.28	0.103315	0.845605	FALSE	485.944	-0.0234518	0.918852	FALSE	11.0928	0.115174	NA	FALSE	12.0259	0.553779	NA	FALSE	1434.14	0.590991	0.999947	FALSE	1304.66	0.5493	0.710962	FALSE	18.5186	0.580347	NA	FALSE	13.1183	0.436737	NA	FALSE
ENSG00000010244	ZNF207	chr17:30677135-30708905	chr17:30674635-30679635	15279.6	0.152906	0.519487	FALSE	10124.5	-0.140496	0.147728	FALSE	28396.3	0.0655188	0.837681	FALSE	41.4591	0.827816	0.287074	FALSE	1464.58	0.367529	0.00457708	FALSE	5.74362	0.518489	NA	FALSE	362.628	-0.505959	0.304516	FALSE	64.8631	0.101859	0.999947	FALSE	2668.5	-0.0546948	0.999981	FALSE	13.0599	-0.131839	NA	FALSE	368.711	0.112859	0.986935	FALSE
ENSG00000010256	UQCRC1	chr3:48636434-48648409	chr3:48645909-48650909	9091.72	-0.318132	0.167868	FALSE	8502.17	0.251896	0.115916	FALSE	7333.45	-0.114189	0.825705	FALSE	23.2267	0.235884	0.782202	FALSE	474.375	0.169402	0.341042	FALSE	29.8887	0.223236	0.772938	FALSE	120.255	-0.367465	0.385188	FALSE	17.4564	-0.119591	0.999947	FALSE	599.617	-0.0545847	0.999981	FALSE	15.5838	-0.116594	NA	FALSE	171.852	0.345804	0.910802	FALSE
ENSG00000010270	STARD3NL	chr7:38217823-38270272	chr7:38215323-38220323	4396.42	0.0381385	0.940905	FALSE	4187.26	0.0233927	0.947171	FALSE	4870.44	-0.0347424	0.944332	FALSE	84.6807	0.561693	0.487288	FALSE	1517.72	0.211288	0.138202	FALSE	16.6921	0.235542	0.798278	FALSE	359.498	-0.00314133	0.995939	FALSE	122.539	0.510631	0.999947	FALSE	3282.57	0.272174	0.999981	FALSE	25.2296	0.13514	0.999877	FALSE	441.437	0.204076	0.977023	FALSE
ENSG00000010278	CD9	chr12:6308880-6347425	chr12:6306380-6311380	5455.02	-0.919938	0.00161247	FALSE	5499.94	0.262396	0.66589	FALSE	7368.8	0.190143	0.881645	FALSE	58.3696	0.441949	0.569972	FALSE	1102.39	0.000605466	0.99875	FALSE	21.8499	0.883799	0.1967	FALSE	167.414	-0.197986	0.718668	FALSE	200.853	0.205968	0.999947	FALSE	2729.63	0.585743	0.57695	FALSE	69.374	0.271639	0.999877	FALSE	483.09	0.885084	0.0627379	FALSE
ENSG00000010282	HHATL	chr3:42734154-42744319	chr3:42741819-42746819	1.9057	4.30604	0.00434	FALSE	1.74954	-0.584132	0.789625	FALSE	0.571804	0.285518	NA	FALSE	459.012	-0.0918286	0.869579	FALSE	23.5561	-0.266082	NA	FALSE	75.8891	-0.321078	0.592978	FALSE	16.3267	0.266492	NA	FALSE	194.885	0.0966542	0.999947	FALSE	53.645	-0.130288	0.999981	FALSE	46.7029	0.221601	0.999877	FALSE	6.1653	0.0529408	NA	FALSE
ENSG00000010292	NCAPD2	chr12:6602521-6641121	chr12:6600021-6605021	11485.3	0.0307606	0.960235	FALSE	13139.7	1.16825	0.00683349	TRUE	16183.7	-0.248697	0.468244	FALSE	47.3227	0.597696	0.508319	FALSE	1734.18	0.382328	0.000418641	FALSE	7.41665	0.500156	NA	FALSE	293.12	-0.119378	0.819812	FALSE	101.884	0.528469	0.999947	FALSE	3626.84	0.676974	0.328475	FALSE	18.8086	0.223705	NA	FALSE	496.859	0.921757	0.0519566	FALSE
ENSG00000010295	IFFO1	chr12:6647540-6665239	chr12:6662739-6667739	2034.57	-0.0663071	0.886948	FALSE	2833.84	0.594932	0.00770075	FALSE	943.87	0.861487	0.230003	FALSE	26.5192	0.25374	0.784295	FALSE	614.815	0.413248	0.0046638	FALSE	5.05986	0.389399	NA	FALSE	155.047	-0.402345	0.415851	FALSE	61.4019	0.297324	0.999947	FALSE	1859.7	0.667537	0.336104	FALSE	18.0595	0.210875	NA	FALSE	225.902	1.0822	0.0241809	TRUE
ENSG00000010310	GIPR	chr19:46171501-46186982	chr19:46169001-46174001	177.198	-0.245755	0.65668	FALSE	119.55	1.18186	0.0516149	FALSE	38.2915	0.30395	0.864297	FALSE	48.0093	0.445838	0.588844	FALSE	204.484	0.0441989	0.906759	FALSE	16.1806	0.0694817	0.948364	FALSE	96.5203	-0.366032	0.50366	FALSE	85.7325	-0.309858	0.999947	FALSE	271.954	0.410674	0.999981	FALSE	42.4939	-0.290364	0.999877	FALSE	44.9572	0.476188	0.795657	FALSE
ENSG00000010318	PHF7	chr3:52444672-52457657	chr3:52442172-52447172	309.453	-0.245616	0.475667	FALSE	460.982	-0.0521162	0.784723	FALSE	469.088	-0.00765443	0.992493	FALSE	34.5788	-0.104081	0.911895	FALSE	319.211	0.237364	0.239729	FALSE	7.27602	0.420751	NA	FALSE	402.693	-0.295651	0.454236	FALSE	24.2194	-0.0779041	0.999947	FALSE	437.642	0.0439817	0.999981	FALSE	14.7012	-0.288527	NA	FALSE	455.321	0.210862	0.97614	FALSE
ENSG00000010319	SEMA3G	chr3:52467068-52479101	chr3:52476601-52481601	83.4947	-0.374796	0.447107	FALSE	35.7763	1.25805	0.00536213	FALSE	21.7538	0.0809059	0.971009	FALSE	183.98	1.042	0.0223032	TRUE	114.27	-0.48082	0.0730046	FALSE	34.9408	0.61674	0.317481	FALSE	25.5234	0.0391812	0.96159	FALSE	92.6279	-0.254961	0.999947	FALSE	143.979	0.0898436	0.999981	FALSE	33.1738	-0.2944	0.999877	FALSE	13.7301	0.422534	NA	FALSE
ENSG00000010322	NISCH	chr3:52489133-52527087	chr3:52486633-52491633	6788.89	-0.208862	0.495917	FALSE	4144.46	0.437588	0.0784406	FALSE	3500.93	-0.511005	0.000959085	FALSE	47.6184	0.402792	0.619056	FALSE	1717.92	0.085048	0.575912	FALSE	9.52559	0.568499	NA	FALSE	266.341	-0.619201	0.0591977	FALSE	52.4957	0.110108	0.999947	FALSE	1947.61	0.0314114	0.999981	FALSE	9.68467	0.163381	NA	FALSE	252.016	0.141711	0.986231	FALSE
ENSG00000010327	STAB1	chr3:52529353-52558511	chr3:52526853-52531853	293.342	0.53667	0.298282	FALSE	73.07	0.650878	0.0072631	FALSE	261.344	0.316184	0.581334	FALSE	282.031	0.48658	0.320204	FALSE	353.29	-0.212215	0.279823	FALSE	11.456	-0.35546	NA	FALSE	43.5419	1.28556	0.00267905	TRUE	155.398	-0.0406421	0.999947	FALSE	359.872	0.0868114	0.999981	FALSE	10.7909	-0.116098	NA	FALSE	26.7986	0.200516	0.977409	FALSE
ENSG00000010361	FUZ	chr19:50310125-50320633	chr19:50318133-50323133	1670.49	0.878582	0.00757257	FALSE	1782.52	0.551816	0.166986	FALSE	926.539	0.0565555	0.96475	FALSE	14.8133	0.135952	0.895044	FALSE	182.49	0.274493	0.276387	FALSE	7.38985	-0.122102	NA	FALSE	850.563	-0.255391	0.622852	FALSE	22.6489	-0.155406	0.999947	FALSE	317.325	0.162638	0.999981	FALSE	14.2641	-0.492941	NA	FALSE	657.854	-0.100875	0.986935	FALSE
ENSG00000010379	SLC6A13	chr12:329788-372039	chr12:369539-374539	11.5284	0.873762	0.190849	FALSE	24.1024	0.759149	0.365165	FALSE	43.5962	-0.733231	0.423687	FALSE	3143.24	0.528012	0.329279	FALSE	152.468	-0.41231	0.183801	FALSE	186.016	0.678726	0.204006	FALSE	15.9629	0.277799	NA	FALSE	1405.64	0.269539	0.999947	FALSE	596.027	0.726314	0.194128	FALSE	72.7816	0.0781497	0.999877	FALSE	16.4078	0.13808	0.986935	FALSE
ENSG00000010404	IDS	chrX:148558520-148615470	chrX:148612970-148617970	9555.34	0.647308	0.143953	FALSE	4342.78	-0.584606	0.0616185	FALSE	23361.5	0.0609721	0.92003	FALSE	111.46	-0.213644	0.777207	FALSE	813.058	0.263864	0.0636229	FALSE	1.69068	0.363468	NA	FALSE	7.10559	0.49727	NA	FALSE	88.1517	-0.0691548	0.999947	FALSE	1404.36	-0.197801	0.999981	FALSE	2.82624	0.269392	NA	FALSE	4.36619	0.147258	NA	FALSE
ENSG00000010438	PRSS3	chr9:33750514-33799230	chr9:33748014-33753014	25.9671	2.92692	0.00614051	FALSE	4.76006	-0.424639	0.713444	FALSE	8.09691	-0.301387	0.906285	FALSE	595.4	0.503512	0.314957	FALSE	282.428	-0.143646	0.498467	FALSE	168.118	0.975437	0.0158043	FALSE	17.9836	-0.114457	NA	FALSE	489.166	-0.267009	0.999947	FALSE	502.873	0.0848478	0.999981	FALSE	193.714	-0.451774	0.999877	FALSE	8.06615	0.274608	NA	FALSE
ENSG00000010539	ZNF200	chr16:3272324-3286221	chr16:3283721-3288721	1014.65	-0.101067	0.580827	FALSE	997.998	0.451608	2.72252e-05	FALSE	1180.27	0.195005	0.283419	FALSE	39.4391	1.00961	0.106677	FALSE	460.583	0.186917	0.260777	FALSE	59.5114	0.136031	0.840992	FALSE	242.521	-0.30112	0.477969	FALSE	40.6729	0.318475	0.999947	FALSE	792.73	-0.144282	0.999981	FALSE	32.1998	-0.0877936	0.999877	FALSE	373.146	0.17121	0.977409	FALSE
ENSG00000010610	CD4	chr12:6896023-6929974	chr12:6893523-6898523	387.303	0.705622	0.209814	FALSE	382.732	-0.824102	0.0678816	FALSE	454.186	-0.785198	0.361937	FALSE	430.058	1.03933	0.017384	TRUE	320.434	-0.456439	0.037458	FALSE	26.1434	0.534292	0.437007	FALSE	29.8082	-0.0392237	0.961241	FALSE	393.494	0.561364	0.999947	FALSE	796.894	0.476869	0.974153	FALSE	22.1199	0.458153	NA	FALSE	43.1193	0.0139053	0.998828	FALSE
ENSG00000010626	LRRC23	chr12:6982732-7023407	chr12:6980232-6985232	487.107	0.319323	0.304823	FALSE	963.143	0.592855	0.177877	FALSE	526.682	0.354012	0.317599	FALSE	120.28	0.28879	0.664664	FALSE	671.699	0.208197	0.20596	FALSE	6.94154	0.74038	NA	FALSE	225.461	0.135803	0.759128	FALSE	155.001	0.583455	0.999947	FALSE	1671.01	0.573385	0.622076	FALSE	20.7371	0.273221	NA	FALSE	397.303	0.850682	0.124755	FALSE
ENSG00000010671	BTK	chrX:100604434-100641183	chrX:100638683-100643683	6.02929	0.173273	0.895378	FALSE	5.56081	-1.23658	0.312593	FALSE	4.50073	-0.222358	NA	FALSE	592.874	0.670477	0.0900654	FALSE	95.6797	-0.22143	0.460291	FALSE	40.8139	0.491744	0.450629	FALSE	5.14616	0.40004	NA	FALSE	383.645	-0.0926944	0.999947	FALSE	165.082	0.227186	0.999981	FALSE	32.9872	-0.283103	0.999877	FALSE	3.91167	-0.0106488	NA	FALSE
ENSG00000010704	HFE	chr6:26087508-26098571	chr6:26085008-26090008	18.8526	0.236244	0.786842	FALSE	1191.89	-0.0182479	0.910738	FALSE	922.231	0.411603	0.10653	FALSE	86.0365	-0.149257	0.819011	FALSE	139.339	-0.0448154	0.899981	FALSE	40.6406	0.019366	0.983096	FALSE	14.4333	0.288981	NA	FALSE	23.0729	0.0467203	0.999947	FALSE	348.428	-0.120673	0.999981	FALSE	11.8813	0.164444	NA	FALSE	208.497	-0.0422016	0.993127	FALSE
ENSG00000010803	SCMH1	chr1:41492871-41707826	chr1:41705326-41710326	2080.51	-0.181224	0.609696	FALSE	1409.17	-0.1857	0.222426	FALSE	5263.81	-0.445458	0.00905394	FALSE	297.629	0.48144	0.53209	FALSE	5199.11	0.132263	0.206653	FALSE	7.97883	0.580244	NA	FALSE	351.938	-0.397736	0.273162	FALSE	374.459	0.246861	0.999947	FALSE	7146.31	-0.0723258	0.999981	FALSE	19.414	-0.384249	NA	FALSE	731.442	0.0121388	0.998344	FALSE
ENSG00000010810	FYN	chr6:111981534-112194655	chr6:112192155-112197155	5283.62	-0.434609	0.0319969	FALSE	5117.37	-0.114215	0.758154	FALSE	4672.2	-0.476572	0.509158	FALSE	336.472	0.466103	0.55034	FALSE	5770.42	0.063458	0.689012	FALSE	12.7714	0.352113	NA	FALSE	247.135	-0.475286	0.252182	FALSE	453.564	0.264448	0.999947	FALSE	8392.23	-0.256675	0.999981	FALSE	18.197	-0.0196418	NA	FALSE	374.721	-0.119108	0.986935	FALSE
ENSG00000010818	HIVEP2	chr6:143072603-143266338	chr6:143263838-143268838	3195.56	0.838728	0.00279779	FALSE	2863.72	-0.394663	0.00901303	FALSE	9543.15	0.249661	0.324727	FALSE	431.524	0.123239	0.863388	FALSE	3585.41	0.191569	0.152439	FALSE	8.83438	0.580591	NA	FALSE	1176.33	-0.189584	0.710726	FALSE	479.493	0.175862	0.999947	FALSE	7780.8	-0.0314891	0.999981	FALSE	32.0513	-0.651133	0.854052	FALSE	1940.25	0.180963	0.977023	FALSE
ENSG00000010932	FMO1	chr1:171217637-171255117	chr1:171215137-171220137	23.5658	-0.66763	0.322731	FALSE	33.2915	-1.95806	0.0176485	FALSE	19.882	-0.166856	0.937033	FALSE	1501.9	1.04567	0.00476823	TRUE	168.272	-0.538152	0.0715855	FALSE	182.239	1.9767	3.16827e-08	TRUE	13.8731	-0.145673	NA	FALSE	555.72	0.225	0.999947	FALSE	224.863	0.119252	0.999981	FALSE	50.3243	0.53717	0.999877	FALSE	7.36773	-0.0102911	NA	FALSE
ENSG00000011007	TCEB3	chr1:24069644-24088549	chr1:24067144-24072144	5884.12	-0.0242093	0.961175	FALSE	2613.17	0.158093	0.387136	FALSE	8816.73	0.132889	0.846265	FALSE	26.7932	0.338752	0.717999	FALSE	874.266	0.340217	0.0197892	FALSE	9.66018	0.228534	NA	FALSE	251.314	-0.502703	0.160374	FALSE	34.3204	0.119686	0.999947	FALSE	1312.11	-0.149495	0.999981	FALSE	10.3114	-0.104113	NA	FALSE	402.894	0.249823	0.96354	FALSE
ENSG00000011009	LYPLA2	chr1:24117459-24122029	chr1:24114959-24119959	6020.48	0.853673	0.0169468	FALSE	3871.59	0.177314	0.654204	FALSE	7004.88	0.259871	0.795375	FALSE	5.70199	1.05439	0.238001	FALSE	129.65	0.390628	0.107541	FALSE	5.85336	1.18427	NA	FALSE	361.25	-0.278252	0.500649	FALSE	8.07486	0.0263208	NA	FALSE	230.477	0.0063986	0.999981	FALSE	12.1633	0.0358115	NA	FALSE	308.752	-0.17129	0.977409	FALSE
ENSG00000011021	CLCN6	chr1:11866206-11903201	chr1:11863706-11868706	2171.25	0.433302	0.233964	FALSE	1347.12	-0.138034	0.301188	FALSE	2963.11	-0.429125	0.0334112	FALSE	50.7919	0.630461	0.428668	FALSE	1656.02	0.0854459	0.548305	FALSE	7.40896	0.311037	NA	FALSE	461.338	-0.428018	0.24105	FALSE	67.6203	0.131818	0.999947	FALSE	2703.89	-0.151752	0.999981	FALSE	15.8045	-0.0121462	NA	FALSE	686.281	0.12012	0.986935	FALSE
ENSG00000011028	MRC2	chr17:60704761-60770958	chr17:60702261-60707261	74638.5	0.341015	0.422446	FALSE	35619.4	0.523563	2.30491e-32	FALSE	7259.25	-0.43111	0.547901	FALSE	77.1436	0.823402	0.288573	FALSE	2639.76	0.267582	0.0247005	FALSE	8.38549	0.394517	NA	FALSE	524.562	-0.978257	0.000312644	FALSE	123.679	0.0483336	0.999947	FALSE	2973.58	0.142082	0.999981	FALSE	17.8105	-0.163103	NA	FALSE	580.376	0.526949	0.554889	FALSE
ENSG00000011052	NME2	chr17:49230950-49249105	chr17:49228450-49233450	22405.5	-0.0802274	0.888649	FALSE	22664.9	0.226504	0.0327282	FALSE	9728.13	0.186231	0.692035	FALSE	25.5471	0.618669	0.499237	FALSE	621.07	0.336049	0.0249567	FALSE	5.41104	0.304031	NA	FALSE	176.158	-0.105223	0.843189	FALSE	34.1725	-0.0817701	0.999947	FALSE	910.251	-0.00271278	0.999981	FALSE	10.2858	0.180062	NA	FALSE	169.176	-0.118239	0.986935	FALSE
ENSG00000011083	SLC6A7	chr5:149569519-149602351	chr5:149567019-149572019	2.99296	0.0467149	0.984433	FALSE	8.92049	-3.05507	0.0128906	FALSE	3.86866	0.798527	NA	FALSE	944.754	0.250941	0.603139	FALSE	270.653	-0.354806	0.0987723	FALSE	474.179	0.150858	0.764601	FALSE	17.0217	0.168502	0.831937	FALSE	526.367	-0.0742066	0.999947	FALSE	421.123	-0.159253	0.999981	FALSE	260.29	-0.0517434	0.999877	FALSE	8.23342	0.184223	NA	FALSE
ENSG00000011105	TSPAN9	chr12:3186520-3395730	chr12:3184020-3189020	4640.38	0.318358	0.425836	FALSE	3440.82	0.26143	0.261837	FALSE	2274.93	-0.485489	0.328617	FALSE	869.658	0.231629	0.679961	FALSE	3996.61	-0.0632802	0.797415	FALSE	12.7084	-0.623586	NA	FALSE	214.973	0.146454	0.759414	FALSE	1179.16	0.525332	0.999947	FALSE	9520.37	0.624232	0.45999	FALSE	39.1584	0.133897	0.999877	FALSE	573.429	0.789728	0.187107	FALSE
ENSG00000011114	BTBD7	chr14:93703895-93799438	chr14:93796938-93801938	3437.52	-0.492181	0.0023029	FALSE	2437.24	0.0594941	0.847952	FALSE	8600.77	-0.300009	0.414007	FALSE	138.598	0.360759	0.644547	FALSE	2445.36	0.0904903	0.489862	FALSE	9.13726	1.18477	NA	FALSE	335.467	-0.22581	0.632274	FALSE	173.262	0.249272	0.999947	FALSE	3809.01	-0.122885	0.999981	FALSE	14.4662	-0.0972126	NA	FALSE	432.732	0.221444	0.972714	FALSE
ENSG00000011132	APBA3	chr19:3750816-3761697	chr19:3759197-3764197	844.867	0.0625701	0.797553	FALSE	1058.83	-0.181052	0.0760581	FALSE	1100.88	0.0182277	0.984704	FALSE	14.3132	0.46032	0.620259	FALSE	311.998	-0.00228336	0.995196	FALSE	5.81598	0.514334	NA	FALSE	361.247	-0.238768	0.5998	FALSE	19.1348	-0.151138	0.999947	FALSE	449.466	-0.0548104	0.999981	FALSE	14.904	-0.226349	NA	FALSE	447.229	-0.0978966	0.986935	FALSE
ENSG00000011143	MKS1	chr17:56282802-56296966	chr17:56294466-56299466	1023.76	-0.0124988	0.956261	FALSE	845.15	0.442206	5.98091e-06	FALSE	603.179	-0.101872	0.825239	FALSE	25.7553	0.0399365	0.967522	FALSE	454.034	0.112058	0.617733	FALSE	7.68822	0.50886	NA	FALSE	179.636	0.017568	0.976909	FALSE	35.1882	-0.0153806	0.999947	FALSE	517.406	0.0344095	0.999981	FALSE	11.2598	0.172461	NA	FALSE	135.168	0.134135	0.986935	FALSE
ENSG00000011198	ABHD5	chr3:43731604-43775863	chr3:43729104-43734104	1731.93	-1.03693	2.76263e-05	TRUE	3350.9	-0.466854	0.0696308	FALSE	4568.77	0.375145	0.0146257	FALSE	66.8334	0.46235	0.576678	FALSE	1130.02	0.178599	0.228537	FALSE	17.5163	0.501514	0.524812	FALSE	169.974	-0.271184	0.54047	FALSE	76.6613	0.285539	0.999947	FALSE	1979.09	-0.199667	0.999981	FALSE	13.4063	-0.116423	NA	FALSE	286.511	0.0477676	0.991579	FALSE
ENSG00000011201	KAL1	chrX:8496914-8700227	chrX:8697727-8702727	3382.21	-1.2716	0.0559047	FALSE	2484.2	0.988154	0.0141883	FALSE	8489.39	-0.825834	0.388608	FALSE	330.835	0.421726	0.488647	FALSE	1466.41	-0.14473	0.446669	FALSE	22.7957	0.739392	0.305584	FALSE	60.0272	-0.523182	0.266068	FALSE	359.037	-0.274549	0.999947	FALSE	2249.43	0.22418	0.999981	FALSE	15.1965	-0.354969	NA	FALSE	123.055	0.415979	0.851963	FALSE
ENSG00000011243	AKAP8L	chr19:15490858-15529952	chr19:15527452-15532452	4065.5	-0.313082	0.178217	FALSE	3639.07	-0.102826	0.103496	FALSE	1148.86	-0.167333	0.745918	FALSE	47.0525	0.580759	0.513487	FALSE	1421.12	0.0977668	0.469568	FALSE	7.05836	0.31022	NA	FALSE	212.01	-0.48785	0.188204	FALSE	54.9575	0.0695952	0.999947	FALSE	1750.1	-0.0680014	0.999981	FALSE	14.2984	-0.162522	NA	FALSE	177.745	0.238994	0.972962	FALSE
ENSG00000011258	MBTD1	chr17:49254785-49337524	chr17:49335024-49340024	1258.86	0.189738	0.566193	FALSE	1119.28	0.274946	0.0721388	FALSE	1090.64	-0.0566618	0.945783	FALSE	111.345	0.548124	0.497311	FALSE	2611.78	0.228862	0.0723335	FALSE	7.23431	0.670157	NA	FALSE	475.359	-0.275162	0.454782	FALSE	146.477	0.154385	0.999947	FALSE	4250.01	-0.0887295	0.999981	FALSE	14.3967	-0.278494	NA	FALSE	633.727	0.290674	0.917918	FALSE
ENSG00000011260	UTP18	chr17:49337888-49375297	chr17:49335388-49340388	3240.19	0.101795	0.779761	FALSE	4509.35	0.0157882	0.928343	FALSE	2748.51	0.00831089	0.98967	FALSE	47.4855	0.431383	0.606269	FALSE	1346.62	0.323807	0.00552158	FALSE	7.82825	0.602431	NA	FALSE	475.879	-0.287217	0.431855	FALSE	61.7557	0.02951	0.999947	FALSE	2141.57	-0.144688	0.999981	FALSE	14.3363	-0.278569	NA	FALSE	634.871	0.290821	0.917305	FALSE
ENSG00000011275	RNF216	chr7:5659677-5821370	chr7:5818870-5823870	6090.72	-0.671636	0.00564817	FALSE	7525.91	0.855392	9.41462e-07	FALSE	8478.46	-0.21367	0.103585	FALSE	193.947	0.492414	0.55176	FALSE	5163.54	0.0412203	0.762766	FALSE	10.0202	0.949903	NA	FALSE	219.722	-0.443584	0.239868	FALSE	351.686	0.469024	0.999947	FALSE	11402.1	0.492902	0.862863	FALSE	15.9542	0.0782463	NA	FALSE	471.103	0.84063	0.0701071	FALSE
ENSG00000011295	TTC19	chr17:15902693-15948329	chr17:15900193-15905193	4127.58	-0.175995	0.434428	FALSE	3777.36	-0.145606	0.247912	FALSE	3597.6	0.18758	0.732712	FALSE	59.1076	0.705148	0.453268	FALSE	1892.23	0.342176	0.00196644	FALSE	9.67539	0.600287	NA	FALSE	429.724	-0.208572	0.703923	FALSE	108.872	0.166061	0.999947	FALSE	3533.41	0.053448	0.999981	FALSE	22.6445	-0.271124	NA	FALSE	787.27	0.332979	0.86397	FALSE
ENSG00000011304	PTBP1	chr19:797074-812327	chr19:794574-799574	14369.5	-0.259498	0.332108	FALSE	12930.4	-0.00782615	0.969963	FALSE	34640.2	0.0879777	0.795387	FALSE	24.9622	0.531277	0.569325	FALSE	906.607	0.329358	0.0105143	FALSE	8.00705	0.598794	NA	FALSE	553.124	-0.40489	0.389324	FALSE	44.3662	-0.159657	0.999947	FALSE	1466.28	0.147344	0.999981	FALSE	18.4126	-0.396627	NA	FALSE	949.46	0.232775	0.95287	FALSE
ENSG00000011332	DPF1	chr19:38701645-38720354	chr19:38717854-38722854	185.938	-0.125058	0.775068	FALSE	22.0071	0.854572	0.0166465	FALSE	109.11	-0.35596	0.741676	FALSE	108.251	0.00387617	0.996383	FALSE	292.142	-0.0259776	0.928965	FALSE	193.47	0.0171427	0.980921	FALSE	36.2652	-0.127631	0.861763	FALSE	240.84	-0.191819	0.999947	FALSE	194.197	0.0673939	0.999981	FALSE	193.316	-0.268263	0.999877	FALSE	17.802	0.314853	0.946367	FALSE
ENSG00000011347	SYT7	chr11:61282784-61348620	chr11:61346120-61351120	114.121	3.00086	3.35282e-08	TRUE	216.692	-2.263	2.59608e-11	TRUE	3186.01	-1.3193	0.0164031	TRUE	3741.86	-0.024015	0.96622	FALSE	301.702	-0.0924337	0.706589	FALSE	348.232	0.0912904	0.862745	FALSE	60.68	-0.387355	0.460456	FALSE	1634.7	0.148496	0.999947	FALSE	680.975	-0.357375	0.999981	FALSE	190.628	-0.176453	0.999877	FALSE	211.822	-0.21089	0.977023	FALSE
ENSG00000011376	LARS2	chr3:45429997-45590913	chr3:45427497-45432497	3425.85	0.0420502	0.890709	FALSE	2805.38	-0.022512	0.952752	FALSE	2681.92	0.1831	0.745918	FALSE	246.093	0.315804	0.665108	FALSE	4955.66	0.126977	0.283837	FALSE	42.5961	0.871751	0.162143	FALSE	110.163	-0.309798	0.486587	FALSE	232.285	0.319578	0.999947	FALSE	5947.57	-0.0542215	0.999981	FALSE	19.0767	0.540132	NA	FALSE	84.3732	0.0492302	0.992939	FALSE
ENSG00000011405	PIK3C2A	chr11:17099276-17229530	chr11:17227030-17232030	10812.8	-0.548715	0.0922976	FALSE	7573.48	0.230446	0.0971499	FALSE	18235.6	-0.36416	0.0518439	FALSE	161.325	0.538485	0.499896	FALSE	3575.92	-0.0142041	0.925625	FALSE	7.50484	0.364763	NA	FALSE	350.822	-0.407552	0.330907	FALSE	215.037	0.255539	0.999947	FALSE	5956.04	-0.0626388	0.999981	FALSE	14.7888	-0.132755	NA	FALSE	451.405	0.0267098	0.995551	FALSE
ENSG00000011422	PLAUR	chr19:44150246-44174699	chr19:44172199-44177199	3329.26	0.612723	0.0581619	FALSE	3774.42	-0.53824	0.274969	FALSE	7566.01	0.686822	0.162548	FALSE	36.9192	0.462909	0.62736	FALSE	814.418	0.29838	0.0342359	FALSE	11.2991	0.281477	NA	FALSE	280.015	-0.264879	0.594199	FALSE	40.2695	0.0453476	0.999947	FALSE	1357.69	-0.274478	0.999981	FALSE	13.2085	-0.0854734	NA	FALSE	327.78	0.0347172	0.994735	FALSE
ENSG00000011426	ANLN	chr7:36429414-36493400	chr7:36426914-36431914	20569.7	-1.06911	0.0649159	FALSE	25862.6	0.725185	9.85924e-22	FALSE	30803.3	0.0761692	0.929502	FALSE	86.6335	0.528709	0.516479	FALSE	2616.06	0.516665	1.29444e-06	FALSE	7.59234	0.456342	NA	FALSE	484.392	-0.545486	0.236925	FALSE	160.683	0.297037	0.999947	FALSE	5739.72	0.529166	0.743819	FALSE	16.9709	-0.115792	NA	FALSE	715.217	0.432514	0.785158	FALSE
ENSG00000011451	WIZ	chr19:15532318-15560762	chr19:15558262-15563262	2386.14	-0.140407	0.702159	FALSE	1415.22	-0.0595359	0.63749	FALSE	9300.35	-0.0451783	0.929356	FALSE	142.579	1.07743	0.0795228	FALSE	793.528	-0.171218	0.375411	FALSE	15.7349	1.19719	0.0845909	FALSE	157.099	-0.50625	0.288468	FALSE	108.126	-0.0160389	0.999947	FALSE	867.887	0.0407369	0.999981	FALSE	19.7856	-0.0560344	NA	FALSE	264.008	-0.105179	0.986935	FALSE
ENSG00000011454	RABGAP1	chr9:125703111-125867145	chr9:125700611-125705611	5111.31	-0.25742	0.246334	FALSE	3543.09	-0.115496	0.448103	FALSE	4159.37	-0.62485	0.148895	FALSE	226.947	0.464849	0.555582	FALSE	5078.4	0.18156	0.110834	FALSE	9.00851	0.68504	NA	FALSE	171.36	-0.612065	0.0679361	FALSE	304.799	0.281539	0.999947	FALSE	8250.4	-0.109836	0.999981	FALSE	11.2364	-0.176468	NA	FALSE	187.351	-0.00513749	0.999209	FALSE
ENSG00000011465	DCN	chr12:91539024-91576900	chr12:91574400-91579400	18021.4	1.23557	5.34314e-06	TRUE	31205.2	-0.997576	0.00779986	FALSE	12560	-1.04458	0.164616	FALSE	77.1575	0.235403	0.743963	FALSE	993.372	0.368413	0.119972	FALSE	6.91885	1.02635	NA	FALSE	190.312	-0.599549	0.338612	FALSE	128.937	-0.239724	0.999947	FALSE	1606.96	-0.128484	0.999981	FALSE	19.1675	-0.18115	NA	FALSE	123.625	-0.018908	0.997586	FALSE
ENSG00000011478	QPCTL	chr19:46195740-46207247	chr19:46193240-46198240	1202.74	-0.0223762	0.946095	FALSE	828.842	0.104694	0.445177	FALSE	1399.52	-0.0436246	0.958551	FALSE	10.7678	-0.133143	0.898601	FALSE	301.797	0.0620023	0.812691	FALSE	6.00966	0.223368	NA	FALSE	415.761	-0.144692	0.799342	FALSE	14.6533	0.115664	0.999947	FALSE	397.429	-0.0764685	0.999981	FALSE	11.2813	-0.251514	NA	FALSE	391.964	0.263295	0.951685	FALSE
ENSG00000011485	PPP5C	chr19:46850250-46896238	chr19:46847750-46852750	3778.87	-0.369615	0.074663	FALSE	3371.01	0.106151	0.420151	FALSE	5606.14	0.157291	0.636282	FALSE	67.1272	0.290321	0.752102	FALSE	1768.37	0.13729	0.28855	FALSE	30.9717	0.583884	0.459625	FALSE	205.897	-0.656419	0.0776164	FALSE	76.6716	0.0602012	0.999947	FALSE	2260.39	0.020821	0.999981	FALSE	17.7601	0.0524908	NA	FALSE	246.35	0.157927	0.980246	FALSE
ENSG00000011523	CEP68	chr2:65283499-65314138	chr2:65280999-65285999	1959.8	0.656445	1.26664e-05	FALSE	1315.93	0.0638424	0.722228	FALSE	2076.01	-0.142117	0.804764	FALSE	36.2711	0.472119	0.588846	FALSE	1064.5	0.306055	0.0153125	FALSE	12.7658	0.11979	NA	FALSE	163.159	0.011395	0.981181	FALSE	57.2788	0.156115	0.999947	FALSE	1918.34	-0.171562	0.999981	FALSE	15.8678	0.148914	NA	FALSE	227.095	0.356142	0.88772	FALSE
ENSG00000011566	MAP4K3	chr2:39476406-39664453	chr2:39661953-39666953	4001.34	-0.498114	0.00664987	FALSE	3118.45	0.00626874	0.983312	FALSE	5470.18	-0.174805	0.707742	FALSE	267.475	0.658585	0.380782	FALSE	5022.76	0.142651	0.232038	FALSE	9.17362	0.666109	NA	FALSE	390.509	-0.313448	0.521964	FALSE	382.408	0.326593	0.999947	FALSE	9375.32	-0.00359318	0.999981	FALSE	16.6084	-0.436732	NA	FALSE	655.902	0.170437	0.977409	FALSE
ENSG00000011590	ZBTB32	chr19:36195428-36207940	chr19:36192928-36197928	85.4082	0.989852	0.00577401	FALSE	89.3935	-0.146086	0.811368	FALSE	45.0781	1.09392	0.0303011	FALSE	419.484	-0.249565	0.686745	FALSE	96.8705	0.0718839	0.82478	FALSE	136.971	-0.21087	0.794053	FALSE	41.1711	-0.259221	0.689444	FALSE	171.89	-0.0730101	0.999947	FALSE	172.646	-0.193884	0.999981	FALSE	91.5341	-0.343787	0.999877	FALSE	22.2924	0.0515239	0.991579	FALSE
ENSG00000011600	TYROBP	chr19:36395302-36399197	chr19:36396697-36401697	0.363522	0.382956	NA	FALSE	0.636498	0.902163	NA	FALSE	1.59117	1.33928	NA	FALSE	15.8415	0.232314	0.817232	FALSE	29.0298	-0.388633	0.228132	FALSE	30.6502	0.361071	0.662755	FALSE	23.3563	0.340545	0.607756	FALSE	9.36412	0.316088	NA	FALSE	31.1568	-0.110153	NA	FALSE	13.4957	0.600312	NA	FALSE	6.36391	0.111113	NA	FALSE
ENSG00000011638	TMEM159	chr16:21169697-21191937	chr16:21167197-21172197	968.825	-0.284747	0.325348	FALSE	1730.45	-0.627071	3.28891e-05	FALSE	1142.64	0.0518724	0.955496	FALSE	56.4164	-0.0905849	0.904968	FALSE	558.598	0.0474278	0.842089	FALSE	16.7094	-0.129456	0.895126	FALSE	93.5768	-0.273206	0.591718	FALSE	59.1366	0.135725	0.999947	FALSE	1163.11	-0.230929	0.999981	FALSE	12.032	-0.267504	NA	FALSE	168.262	-0.112622	0.986935	FALSE
ENSG00000011677	GABRA3	chrX:151334705-151619830	chrX:151617330-151622330	376.85	0.590592	0.388175	FALSE	942.895	0.349115	0.591611	FALSE	8058.68	-1.85777	3.25204e-10	TRUE	553.546	-0.325747	0.595427	FALSE	566.841	-0.47371	0.0210985	FALSE	16.5582	-0.841136	0.285586	FALSE	15.9246	0.632039	NA	FALSE	337.45	-0.134653	0.999947	FALSE	3729.24	0.15545	0.999981	FALSE	6.90028	-0.178891	NA	FALSE	88.6097	0.141581	0.986935	FALSE
ENSG00000012048	BRCA1	chr17:41196311-41277500	chr17:41275000-41280000	3260.82	0.254082	0.638694	FALSE	5235.21	0.0598357	0.81334	FALSE	6145.03	0.109195	0.762195	FALSE	92.0299	0.483286	0.543457	FALSE	2271.36	0.36084	0.00521543	FALSE	5.10243	0.489293	NA	FALSE	221.385	0.077738	0.884462	FALSE	97.0571	0.297027	0.999947	FALSE	3239.45	0.0708788	0.999981	FALSE	10.2235	-0.117035	NA	FALSE	211.531	0.0838664	0.986935	FALSE
ENSG00000012061	ERCC1	chr19:45910590-45982086	chr19:45979586-45984586	5249.3	0.265013	0.361212	FALSE	4768.82	0.0161992	0.890688	FALSE	8293.87	0.172109	0.769711	FALSE	195.314	-0.304625	0.709122	FALSE	1104.96	0.312513	0.0245561	FALSE	16.5755	0.142623	0.890768	FALSE	246.676	-0.0133012	0.979839	FALSE	169.347	-0.221191	0.999947	FALSE	1786.49	0.0335633	0.999981	FALSE	15.1603	-0.25683	NA	FALSE	225.191	-0.214882	0.977023	FALSE
ENSG00000012124	CD22	chr19:35810163-35838258	chr19:35807663-35812663	338.596	1.21957	0.0152962	TRUE	181.094	-0.362992	0.255276	FALSE	1104.28	-0.868745	0.145715	FALSE	742.702	-0.730464	0.219864	FALSE	235.805	0.438629	0.0717313	FALSE	14.3315	-0.0292726	NA	FALSE	216.936	-0.532864	0.230359	FALSE	172.821	0.794753	0.740254	FALSE	506.789	-0.548602	0.590337	FALSE	12.7515	0.0370927	NA	FALSE	158.84	-0.344666	0.908371	FALSE
ENSG00000012171	SEMA3B	chr3:50304989-50314977	chr3:50302489-50307489	1298.1	-1.10693	0.0090317	TRUE	594.178	0.785148	0.418471	FALSE	2451.99	-0.415916	0.827077	FALSE	37.0428	1.53405	0.00900138	TRUE	137.548	-0.486428	0.0653959	FALSE	24.7307	2.26645	8.96522e-05	FALSE	272.686	-1.94614	7.8456e-10	TRUE	43.3868	-0.00939334	0.999947	FALSE	290.127	0.324248	0.999981	FALSE	13.1845	-0.0304863	NA	FALSE	173.458	0.094113	0.986935	FALSE
ENSG00000012174	MBTPS2	chrX:21857753-21903542	chrX:21855253-21860253	1678.87	-0.214259	0.657113	FALSE	1199.65	0.180317	0.506646	FALSE	6276.13	-0.0492395	0.950536	FALSE	28.3003	0.141012	0.879953	FALSE	704.102	0.319661	0.0434	FALSE	10.1779	0.163952	NA	FALSE	137.113	-0.368186	0.477087	FALSE	43.0314	0.110782	0.999947	FALSE	1045.12	-0.141029	0.999981	FALSE	9.06416	0.266482	NA	FALSE	171.779	-0.20517	0.977023	FALSE
ENSG00000012211	PRICKLE3	chrX:49031150-49042845	chrX:49040345-49045345	2282.24	0.432474	0.398485	FALSE	682.863	-0.194194	0.555843	FALSE	4670.18	0.242459	0.509608	FALSE	8.58029	0.661799	0.504282	FALSE	230.514	0.265051	0.247142	FALSE	4.76846	0.352329	NA	FALSE	90.7449	-0.0820967	0.88386	FALSE	10.8989	-0.123051	NA	FALSE	337.895	-0.0404661	0.999981	FALSE	7.57544	-0.0447099	NA	FALSE	120.02	-0.127482	0.986935	FALSE
ENSG00000012223	LTF	chr3:46477135-46526724	chr3:46524224-46529224	20.761	1.26841	0.211611	FALSE	26.7566	-1.82286	5.42683e-06	FALSE	290.168	-0.876773	0.125432	FALSE	1763.57	0.395033	0.41671	FALSE	329.072	-0.154968	0.477945	FALSE	55.8826	1.20284	0.0204532	TRUE	20.4915	-0.199242	0.788122	FALSE	600.468	1.10152	0.12934	FALSE	651.503	-0.435493	0.999981	FALSE	11.566	0.307439	NA	FALSE	23.7399	-0.174306	0.983306	FALSE
ENSG00000012232	EXTL3	chr8:28457985-28613116	chr8:28455485-28460485	7264.99	-0.524269	0.0989592	FALSE	9938.18	-0.0808402	0.678791	FALSE	19008.7	-0.421826	0.143015	FALSE	3029.33	1.06954	0.0578562	FALSE	2282.94	-0.172156	0.30594	FALSE	17.5277	0.512464	0.532458	FALSE	33.0939	-0.304506	0.622381	FALSE	757.325	-0.119478	0.999947	FALSE	3967.49	-0.212653	0.999981	FALSE	12.7093	-0.305094	NA	FALSE	30.5727	-0.38072	0.914772	FALSE
ENSG00000012504	NR1H4	chr12:100867485-100958191	chr12:100864985-100869985	24.7132	-2.69402	0.00753303	FALSE	61.7647	0.417084	0.811465	FALSE	60.6788	-2.53725	0.0448424	TRUE	4666.02	-0.158512	0.766582	FALSE	234.116	-0.390318	0.119673	FALSE	159.972	0.422636	0.467925	FALSE	18.8118	-0.367723	0.588587	FALSE	1114.14	-0.0963894	0.999947	FALSE	1322.15	-0.116474	0.999981	FALSE	22.5826	0.256121	NA	FALSE	20.5928	-0.176247	0.982148	FALSE
ENSG00000012660	ELOVL5	chr6:53132195-53213947	chr6:53211447-53216447	10079.4	-0.358478	0.339027	FALSE	10433.7	0.28264	0.30291	FALSE	14784.4	-0.0758457	0.92743	FALSE	105.733	0.715174	0.35642	FALSE	2210.01	0.123127	0.350778	FALSE	32.8694	1.05892	0.0677499	FALSE	391.702	-0.311852	0.546389	FALSE	148.091	0.229747	0.999947	FALSE	3671.32	-0.0793167	0.999981	FALSE	18.0334	-0.182746	NA	FALSE	565.941	0.323761	0.881454	FALSE
ENSG00000012779	ALOX5	chr10:45869660-45941561	chr10:45867160-45872160	8.69128	0.725584	0.378003	FALSE	10.7756	-0.54439	0.500142	FALSE	71.0914	-1.84256	0.0999415	FALSE	3928.11	-0.00448494	0.993948	FALSE	192.762	-0.126549	0.715772	FALSE	651.205	0.21906	0.620603	FALSE	20.8566	0.0812166	0.923016	FALSE	963.626	-0.28928	0.999947	FALSE	708.989	0.0617281	0.999981	FALSE	310.204	-0.320906	0.999877	FALSE	27.2892	0.256534	0.972714	FALSE
ENSG00000012817	KDM5D	chrY:21865750-21906825	chrY:21904325-21909325	4225.82	-0.321236	0.412338	FALSE	2486.62	-1.23118	0.583242	FALSE	3528.08	-0.559756	0.0197618	FALSE	24.981	0.576622	0.525829	FALSE	897.308	0.163591	0.251226	FALSE	3.33723	0.520224	NA	FALSE	193.981	-0.332885	0.610102	FALSE	28.3801	0.0695291	0.999947	FALSE	994.636	-0.0622107	0.999981	FALSE	6.30278	-0.263047	NA	FALSE	123.336	-0.135403	0.977023	FALSE
ENSG00000012822	CALCOCO1	chr12:54104902-54121529	chr12:54119029-54124029	5350.27	-0.229162	0.565599	FALSE	6076.33	-0.260794	0.163045	FALSE	4684.7	-0.961614	6.82713e-19	FALSE	34.3717	0.333071	0.686352	FALSE	574.377	-0.00843366	0.967529	FALSE	9.72317	0.303122	NA	FALSE	114.455	-0.48648	0.261117	FALSE	31.5938	-0.0320498	0.999947	FALSE	820.968	-0.37057	0.999981	FALSE	6.97583	0.268842	NA	FALSE	94.7752	-0.0155213	0.998322	FALSE
ENSG00000012963	UBR7	chr14:93673400-93695561	chr14:93670900-93675900	3520.48	0.32842	0.360805	FALSE	2540.92	0.141664	0.285726	FALSE	5469.05	0.0180656	0.986921	FALSE	26.3287	0.517451	0.553697	FALSE	700.494	0.230286	0.12493	FALSE	5.80889	0.328577	NA	FALSE	196.067	0.0379359	0.941488	FALSE	32.8837	0.0636313	0.999947	FALSE	996.613	0.0469517	0.999981	FALSE	9.95446	0.052107	NA	FALSE	209.074	0.289457	0.946367	FALSE
ENSG00000012983	MAP4K5	chr14:50885218-51027844	chr14:51025344-51030344	8787	-0.432609	0.00140158	FALSE	7881.28	0.0808033	0.532789	FALSE	6947.62	-0.187594	0.633267	FALSE	683.378	0.635883	0.158944	FALSE	3985.04	0.181889	0.197548	FALSE	50.1128	1.14739	0.0302867	TRUE	148.901	-0.696365	0.0729335	FALSE	637.62	0.131206	0.999947	FALSE	7408.9	-0.0201213	0.999981	FALSE	168.63	-0.00191714	0.999877	FALSE	153.698	0.0447101	0.988563	FALSE
ENSG00000013016	EHD3	chr2:31456879-31492313	chr2:31454379-31459379	3398.88	0.320984	0.159133	FALSE	2201.24	-0.297328	0.0319098	FALSE	2367.04	-0.107393	0.939521	FALSE	58.4216	0.292664	0.70398	FALSE	1043.08	0.158578	0.296888	FALSE	47.8063	0.39997	0.503913	FALSE	84.851	-0.0179623	0.976077	FALSE	64.2362	0.207535	0.999947	FALSE	1234.99	-0.151631	0.999981	FALSE	27.2479	0.0846843	0.999877	FALSE	103.022	0.255475	0.972714	FALSE
ENSG00000013275	PSMC4	chr19:40476911-40487348	chr19:40474411-40479411	6745.16	0.208296	0.524084	FALSE	4936.67	0.378827	0.0180016	FALSE	6563.01	0.0488068	0.96041	FALSE	18.4291	0.368165	0.692072	FALSE	455.349	0.248746	0.176881	FALSE	10.8592	-0.0818027	NA	FALSE	295.627	-0.185513	0.764309	FALSE	16.9799	-0.0634302	0.999947	FALSE	531.851	-0.0946964	0.999981	FALSE	11.4313	-0.094866	NA	FALSE	222.861	0.135146	0.986935	FALSE
ENSG00000013288	MAN2B2	chr4:6576901-6625089	chr4:6574401-6579401	7124.41	0.109992	0.812236	FALSE	4528.82	-0.323401	4.38778e-05	FALSE	10843.5	-0.439976	0.441033	FALSE	86.4446	0.350476	0.625447	FALSE	1421.08	-0.205096	0.206768	FALSE	69.7637	0.98858	0.0890246	FALSE	100.539	-0.216443	0.64962	FALSE	79.2571	0.113453	0.999947	FALSE	1816.49	-0.168732	0.999981	FALSE	20.3689	0.01335	NA	FALSE	140.754	0.0686105	0.987606	FALSE
ENSG00000013293	SLC7A14	chr3:170177371-170303863	chr3:170301363-170306363	12.1934	1.9916	0.00917294	FALSE	3.94057	2.52965	0.0469694	FALSE	5.84022	-2.67941	0.222476	FALSE	1524.87	-0.0543022	0.930295	FALSE	1043.19	0.0489207	0.808085	FALSE	473.822	-0.11377	0.832397	FALSE	13.371	-0.0606744	NA	FALSE	1093.89	-0.0776981	0.999947	FALSE	1766.36	-0.0175714	0.999981	FALSE	344.769	-0.301552	0.999877	FALSE	9.21213	0.329997	NA	FALSE
ENSG00000013297	CLDN11	chr3:170136652-170578169	chr3:170134152-170139152	23.1253	0.554287	0.281471	FALSE	32.1069	1.1932	0.106328	FALSE	21.2771	-0.264922	0.885775	FALSE	4623.22	-0.127923	0.805863	FALSE	4140.66	0.206689	0.0633939	FALSE	21.1241	0.0398228	0.970204	FALSE	14.1711	0.328611	NA	FALSE	2867.82	0.0281934	0.999947	FALSE	7318.4	0.0086392	0.999981	FALSE	17.7266	-0.0713881	NA	FALSE	9.05794	0.227976	NA	FALSE
ENSG00000013306	SLC25A39	chr17:42396992-42402238	chr17:42399738-42404738	5447.05	-0.215027	0.340021	FALSE	4622.08	-0.190239	0.443696	FALSE	10774.2	0.311397	0.194732	FALSE	9.08744	0.207315	0.839747	FALSE	209.808	0.101609	0.710399	FALSE	8.74793	0.820736	NA	FALSE	370.375	-0.625239	0.0589565	FALSE	10.9145	-0.0531887	NA	FALSE	272.564	0.08622	0.999981	FALSE	12.3472	-0.0791799	NA	FALSE	401.012	0.571864	0.368757	FALSE
ENSG00000013364	MVP	chr16:29831714-29859355	chr16:29829214-29834214	18522.1	0.695305	0.000690265	FALSE	21884	-0.343352	0.0236511	FALSE	14429.6	-0.0864831	0.924645	FALSE	32.5891	0.32813	0.714203	FALSE	1019.9	0.264007	0.0636869	FALSE	5.83475	0.186602	NA	FALSE	271.578	-0.29299	0.46988	FALSE	50.0154	-0.191775	0.999947	FALSE	1621.06	-0.143551	0.999981	FALSE	10.4378	-0.163786	NA	FALSE	297.23	-0.319866	0.907333	FALSE
ENSG00000013374	NUB1	chr7:151038784-151075535	chr7:151036284-151041284	6365.08	0.0210301	0.948517	FALSE	4993.53	-0.394161	0.161774	FALSE	5500.72	0.049402	0.946418	FALSE	54.1564	0.0689919	0.941427	FALSE	1390.91	0.225599	0.0577814	FALSE	56.1731	0.764341	0.140006	FALSE	130.748	-0.237913	0.656642	FALSE	65.993	-0.130027	0.999947	FALSE	1996.77	-0.433204	0.999981	FALSE	28.0392	0.0913499	0.999877	FALSE	203.687	-0.06169	0.988563	FALSE
ENSG00000013375	PGM3	chr6:83870868-83903655	chr6:83901155-83906155	9593.39	-0.656619	0.000176744	FALSE	8535.02	0.0874997	0.817827	FALSE	8737.93	-0.138036	0.657908	FALSE	44.9022	0.538032	0.533471	FALSE	1320.98	0.164426	0.246019	FALSE	7.22271	0.451296	NA	FALSE	255.276	-0.269808	0.487471	FALSE	64.4518	0.179732	0.999947	FALSE	2168.46	-0.00874849	0.999981	FALSE	14.9585	-0.221612	NA	FALSE	344.473	0.345349	0.905899	FALSE
ENSG00000013392	RWDD2A	chr6:83903097-83908651	chr6:83900597-83905597	956.065	-0.399963	0.0260336	FALSE	572.678	0.0504754	0.855288	FALSE	520.233	-0.309578	0.132112	FALSE	7.58594	-0.169669	0.870698	FALSE	159.537	0.316099	0.165495	FALSE	7.02271	0.505582	NA	FALSE	255.337	-0.268007	0.493254	FALSE	13.6705	-0.126818	0.999947	FALSE	270.482	-0.153639	0.999981	FALSE	14.3113	-0.136696	NA	FALSE	345.161	0.349988	0.901307	FALSE
ENSG00000013441	CLK1	chr2:201717731-201729422	chr2:201726922-201731922	4159.27	0.508728	0.0293921	FALSE	3613.5	0.197112	0.367072	FALSE	1168.1	0.0884971	0.895782	FALSE	18.5208	0.354619	0.700273	FALSE	471.685	0.45087	0.00291598	FALSE	7.88658	0.133796	NA	FALSE	570.368	-0.45036	0.308478	FALSE	31.184	0.0012568	0.999947	FALSE	1013.68	-0.106284	0.999981	FALSE	15.6243	-0.316581	NA	FALSE	704.684	0.156047	0.977409	FALSE
ENSG00000013503	POLR3B	chr12:106751435-106903976	chr12:106748935-106753935	1569.12	-0.380589	0.0650729	FALSE	1089.32	0.288714	2.42488e-05	FALSE	2271.75	0.0541717	0.939112	FALSE	194.071	0.394942	0.586407	FALSE	3823.77	0.0440147	0.733108	FALSE	13.1651	-0.342849	NA	FALSE	101.556	0.0249375	0.967904	FALSE	242.715	0.288396	0.999947	FALSE	4849.84	-0.0126399	0.999981	FALSE	19.2658	0.0358512	NA	FALSE	120.393	0.0980988	0.986935	FALSE
ENSG00000013523	ANGEL1	chr14:77253587-77292589	chr14:77290089-77295089	1156.23	0.248397	0.364134	FALSE	867.64	0.246118	0.574063	FALSE	2412.18	0.0544269	0.926246	FALSE	1045.57	0.263667	0.597438	FALSE	805.739	0.0318457	0.854964	FALSE	225.891	0.135107	0.809246	FALSE	27.6921	-0.0362387	0.961725	FALSE	566.287	-0.360333	0.999947	FALSE	897.871	0.0869229	0.999981	FALSE	111.175	-0.268174	0.999877	FALSE	19.1467	0.100468	0.986935	FALSE
ENSG00000013561	RNF14	chr5:141337892-141369856	chr5:141335392-141340392	5339.11	-0.437237	0.0188746	FALSE	4485.34	-0.121688	0.550038	FALSE	5286.22	0.00710558	0.987623	FALSE	128.799	0.107515	0.873232	FALSE	939.418	0.19077	0.211838	FALSE	85.8513	-0.495836	0.324649	FALSE	30.1281	0.797584	0.137916	FALSE	84.5539	-0.0250208	0.999947	FALSE	1540.81	-0.139171	0.999981	FALSE	44.7469	0.0125773	0.999877	FALSE	13.0176	0.0824866	NA	FALSE
ENSG00000013563	DNASE1L1	chrX:153629578-153640449	chrX:153637949-153642949	3798.08	-0.0507535	0.85264	FALSE	4361.85	0.0835539	0.617618	FALSE	6148.95	-0.171027	0.678477	FALSE	5.6049	-0.0857572	0.939763	FALSE	147.124	0.306972	0.206465	FALSE	3.11976	0.384339	NA	FALSE	158.963	-0.526494	0.150621	FALSE	13.1133	-0.141161	0.999947	FALSE	237.384	-0.084654	0.999981	FALSE	8.15472	-0.0836364	NA	FALSE	270.357	0.197186	0.977023	FALSE
ENSG00000013573	DDX11	chr12:31226778-31257725	chr12:31224278-31229278	2843.01	0.45995	0.268822	FALSE	4570.65	0.425041	0.223306	FALSE	2254.93	-0.0212477	0.974135	FALSE	7.84709	0.542365	0.583432	FALSE	223.769	0.302008	0.160029	FALSE	1.48514	-0.284992	NA	FALSE	69.9117	0.496409	0.409883	FALSE	15.9777	0.10182	0.999947	FALSE	414.261	0.413591	0.999981	FALSE	8.26478	0.0462303	NA	FALSE	95.6788	0.863487	0.15941	FALSE
ENSG00000013583	HEBP1	chr12:13127797-13153207	chr12:13150707-13155707	704.389	-0.929902	1.00931e-07	FALSE	934.512	-0.209535	0.515801	FALSE	3187.57	-0.0823432	0.908274	FALSE	39.85	0.449585	0.5959	FALSE	812.872	0.159781	0.272845	FALSE	12.4619	0.220198	NA	FALSE	266.65	-0.333338	0.430065	FALSE	73.8332	0.441999	0.999947	FALSE	1663.75	0.28004	0.999981	FALSE	25.6145	0.168643	0.999877	FALSE	581.117	0.535128	0.531384	FALSE
ENSG00000013588	GPRC5A	chr12:13043715-13070871	chr12:13041215-13046215	1022.73	2.63157	3.33829e-06	TRUE	1192.16	1.45486	0.0758118	FALSE	8599.17	0.515626	0.52392	FALSE	47.5528	0.036544	0.968893	FALSE	487.334	0.791233	9.19961e-06	TRUE	10.3953	-0.127893	NA	FALSE	172.836	0.711945	0.256992	FALSE	84.0374	0.119303	0.999947	FALSE	1357.39	0.508688	0.843963	FALSE	21.9681	0.274823	NA	FALSE	343.161	0.173928	0.972084	FALSE
ENSG00000013619	MAMLD1	chrX:149529688-149682448	chrX:149527188-149532188	220.101	0.128393	0.834882	FALSE	117.672	0.395584	0.424509	FALSE	4119.78	-0.217588	0.825705	FALSE	134.053	0.304724	0.677111	FALSE	1645.68	-0.0478649	0.748616	FALSE	10.4416	0.130212	NA	FALSE	145.533	-0.12145	0.825668	FALSE	167.71	-0.283206	0.999947	FALSE	2207.04	0.199716	0.999981	FALSE	11.5198	-0.203992	NA	FALSE	194.974	0.551727	0.539734	FALSE
ENSG00000013725	CD6	chr11:60739114-60787849	chr11:60736614-60741614	4.22869	-1.75102	0.158672	FALSE	6.65563	-1.33266	0.201093	FALSE	31.2442	-1.86576	0.0531961	FALSE	1854.44	0.307541	0.523417	FALSE	262.49	-0.393508	0.0408915	FALSE	186.178	0.515071	0.247463	FALSE	17.3487	0.614197	0.344428	FALSE	876.793	0.0853203	0.999947	FALSE	488.486	-0.00174862	0.999981	FALSE	101.6	-0.07791	0.999877	FALSE	9.98804	0.185308	NA	FALSE
ENSG00000013810	TACC3	chr4:1723226-1746898	chr4:1720726-1725726	4090.22	-0.47061	0.43488	FALSE	4674.96	0.187232	0.406103	FALSE	7217.56	0.131177	0.741698	FALSE	34.3845	0.710314	0.429811	FALSE	1128.96	0.382899	0.0251516	FALSE	6.83951	0.334663	NA	FALSE	325.904	-0.641873	0.0534157	FALSE	48.2806	-0.132556	0.999947	FALSE	1658.29	0.170064	0.999981	FALSE	11.9757	0.0515406	NA	FALSE	575.585	0.40853	0.792339	FALSE
ENSG00000014123	UFL1	chr6:96969470-97003152	chr6:96966970-96971970	3939.62	0.0650884	0.79407	FALSE	3242.67	0.0853752	0.355622	FALSE	4524.01	-0.250005	0.584159	FALSE	48.6463	0.255022	0.757448	FALSE	1271.92	0.145916	0.374786	FALSE	10.7105	0.582387	NA	FALSE	330.508	-0.137524	0.796974	FALSE	79.2478	0.204298	0.999947	FALSE	2160.17	0.0249291	0.999981	FALSE	17.6209	-0.147557	NA	FALSE	433.163	0.0678373	0.98711	FALSE
ENSG00000014138	POLA2	chr11:65029232-65073060	chr11:65026732-65031732	1855.83	-0.584222	0.171626	FALSE	1843.97	0.0138356	0.97494	FALSE	3885.3	0.135323	0.689992	FALSE	54.0157	0.539589	0.517846	FALSE	1442.28	0.308004	0.0387241	FALSE	13.9718	0.910061	NA	FALSE	201.711	-0.166814	0.716183	FALSE	62.6258	0.0743875	0.999947	FALSE	2162.55	-0.0569633	0.999981	FALSE	12.9463	-0.047327	NA	FALSE	314.636	0.253167	0.956749	FALSE
ENSG00000014164	ZC3H3	chr8:144519824-144623623	chr8:144621123-144626123	613.93	0.414634	0.015072	FALSE	492.984	-0.360481	0.0907966	FALSE	2462.77	0.0900983	0.821469	FALSE	182.326	-0.107646	0.864251	FALSE	3185.37	-0.153699	0.378082	FALSE	6.65535	0.202707	NA	FALSE	280.61	-0.0885969	0.849055	FALSE	203.259	-0.231226	0.999947	FALSE	3745.51	-0.0233775	0.999981	FALSE	10.0037	-0.312861	NA	FALSE	359.983	0.0627541	0.987606	FALSE
ENSG00000014216	CAPN1	chr11:64948036-64979477	chr11:64945536-64950536	11515.3	-0.0913464	0.541901	FALSE	10140.3	-0.217606	0.179996	FALSE	17635.5	-0.102525	0.862485	FALSE	42.0659	0.620852	0.472484	FALSE	1234.94	0.0601872	0.721479	FALSE	11.7976	0.552861	NA	FALSE	217.166	-0.312965	0.40269	FALSE	53.7112	0.147793	0.999947	FALSE	1827.68	-0.0458339	0.999981	FALSE	14.6304	0.00898478	NA	FALSE	334.331	0.042523	0.992459	FALSE
ENSG00000014257	ACPP	chr3:132036210-132087142	chr3:132033710-132038710	18.3741	3.03907	0.00216842	FALSE	3.13925	-1.71649	0.10746	FALSE	7.19941	1.43229	0.271801	FALSE	2400.33	0.79858	0.0489015	FALSE	194.701	-0.683132	0.0127264	TRUE	107.331	-0.00714684	0.992562	FALSE	38.3597	0.649306	0.254195	FALSE	780.91	-0.0356531	0.999947	FALSE	476.944	0.141221	0.999981	FALSE	51.1305	0.192908	0.999877	FALSE	14.8595	0.330342	0.931256	FALSE
ENSG00000014641	MDH1	chr2:63815742-63834331	chr2:63813242-63818242	10617.9	-0.531114	0.00281279	FALSE	14521	0.365706	0.00107063	FALSE	8569.43	-0.256667	0.0890079	FALSE	21.2596	0.369897	0.685041	FALSE	745.928	0.276255	0.0515627	FALSE	6.75668	0.811451	NA	FALSE	236.88	-0.204205	0.684604	FALSE	35.9668	0.268044	0.999947	FALSE	1303.09	-0.0304336	0.999981	FALSE	12.4953	0.059876	NA	FALSE	238.737	0.185284	0.977023	FALSE
ENSG00000014824	SLC30A9	chr4:41992488-42092474	chr4:41989988-41994988	9978.25	-0.264725	0.146377	FALSE	7950.09	0.217472	0.00692171	FALSE	6747.54	0.0462632	0.94933	FALSE	132.256	0.612702	0.394031	FALSE	2930.66	0.173872	0.177711	FALSE	12.3512	0.674671	NA	FALSE	255.748	0.0304855	0.954575	FALSE	165.022	0.191693	0.999947	FALSE	4334.62	-0.105876	0.999981	FALSE	15.3144	0.00561856	NA	FALSE	319.861	0.162387	0.97822	FALSE
ENSG00000014914	MTMR11	chr1:149900542-149908791	chr1:149906291-149911291	1608.01	0.541377	0.0546927	FALSE	719.062	0.415079	0.0197074	FALSE	614.995	0.0292614	0.976681	FALSE	11.8127	0.537188	0.581222	FALSE	297.532	0.298694	0.173246	FALSE	5.73816	0.636486	NA	FALSE	204.683	-0.449981	0.228646	FALSE	11.2208	0.185326	0.999947	FALSE	294.298	-0.132336	0.999981	FALSE	7.30672	0.190665	NA	FALSE	111.407	0.307976	0.953289	FALSE
ENSG00000014919	COX15	chr10:101471600-101491857	chr10:101489357-101494357	3776.85	0.156626	0.383988	FALSE	3292.62	0.301472	0.101739	FALSE	4820.65	0.133666	0.78587	FALSE	27.2437	0.633381	0.462221	FALSE	802.094	0.324442	0.0271677	FALSE	8.32258	0.677386	NA	FALSE	206.947	-0.250224	0.589377	FALSE	32.5888	0.323273	0.999947	FALSE	1177.25	-0.0825396	0.999981	FALSE	9.54162	0.06278	NA	FALSE	251.452	0.15333	0.981125	FALSE
ENSG00000015133	CCDC88C	chr14:91737666-91884188	chr14:91881688-91886688	65.9161	-0.127732	0.751012	FALSE	67.6273	-0.0528709	0.904713	FALSE	101.932	-0.457447	0.537297	FALSE	6198.41	0.668734	0.0915653	FALSE	822.048	-0.435995	0.0172805	FALSE	52.5917	0.653258	0.213533	FALSE	33.7786	-0.101056	0.888835	FALSE	2622.39	-0.11376	0.999947	FALSE	1674.72	0.0257717	0.999981	FALSE	46.1325	0.0188813	0.999877	FALSE	23.0119	0.174535	0.981224	FALSE
ENSG00000015153	YAF2	chr12:42550905-42632151	chr12:42629651-42634651	1062.05	-0.258324	0.363799	FALSE	873.876	-0.201227	0.113866	FALSE	1410.76	-0.130406	0.658927	FALSE	117.322	0.503039	0.519356	FALSE	1927.06	0.0254628	0.889577	FALSE	13.0316	0.472267	NA	FALSE	252.895	-0.537485	0.234027	FALSE	149.13	0.25485	0.999947	FALSE	2910.04	-0.129351	0.999981	FALSE	15.7892	-0.166541	NA	FALSE	495.879	0.146618	0.980246	FALSE
ENSG00000015171	ZMYND11	chr10:180404-300577	chr10:177904-182904	7513.4	-0.523288	0.000679275	FALSE	6570.33	0.0787054	0.748688	FALSE	8633.3	-0.0531605	0.955934	FALSE	168.397	0.592631	0.452128	FALSE	2806.88	0.0740527	0.612639	FALSE	6.80446	0.48044	NA	FALSE	611.356	-0.556465	0.233276	FALSE	237.618	0.28028	0.999947	FALSE	4448.15	-0.060081	0.999981	FALSE	22.4227	-0.177438	NA	FALSE	1113.14	0.185047	0.977023	FALSE
ENSG00000015285	WAS	chrX:48534984-48549818	chrX:48532484-48537484	18.0076	1.42021	0.00825597	FALSE	12.7476	-0.667092	0.301037	FALSE	14.0497	-0.297433	0.870079	FALSE	208.446	0.0680032	0.916441	FALSE	41.7168	0.108544	0.768694	FALSE	4.49396	0.556037	NA	FALSE	87.2643	-0.215173	0.691282	FALSE	117.197	-0.225812	0.999947	FALSE	73.855	-0.0881556	0.999981	FALSE	7.76361	-0.202922	NA	FALSE	138.523	0.302949	0.944892	FALSE
ENSG00000015413	DPEP1	chr16:89679715-89704839	chr16:89677215-89682215	2.07846	3.28677	0.0326678	FALSE	1.63355	-0.0602612	0.979466	FALSE	2.48895	-0.514186	NA	FALSE	466.078	0.376702	0.455042	FALSE	85.433	-0.376225	0.219057	FALSE	134.862	0.846689	0.0522578	FALSE	19.1442	0.442867	0.522512	FALSE	235.272	0.212219	0.999947	FALSE	222.534	0.120399	0.999981	FALSE	41.6294	0.490508	0.999877	FALSE	9.02207	0.210731	NA	FALSE
ENSG00000015475	BID	chr22:18216905-18257536	chr22:18255036-18260036	2507.25	0.0166331	0.97234	FALSE	1605.15	0.535538	0.000149269	FALSE	1719.94	0.50739	0.0693963	FALSE	54.0535	0.163531	0.848542	FALSE	867.99	0.14947	0.317923	FALSE	37.5402	-0.0991874	0.901537	FALSE	99.1561	0.250364	0.617971	FALSE	92.4072	-0.257727	0.999947	FALSE	835.726	-0.011772	0.999981	FALSE	31.6097	-0.464663	0.999877	FALSE	109.421	0.445851	0.81887	FALSE
ENSG00000015479	MATR3	chr5:138609440-138667360	chr5:138606940-138611940	34095.7	0.105208	0.496541	FALSE	29199.6	0.159759	0.15264	FALSE	21532.1	-0.0284826	0.957088	FALSE	79.023	0.596119	0.456739	FALSE	1983.47	0.350045	0.00677523	FALSE	7.24182	0.887412	NA	FALSE	249.833	-0.0606316	0.911753	FALSE	120.584	0.0749236	0.999947	FALSE	3565.35	-0.0718392	0.999981	FALSE	12.7404	-0.303366	NA	FALSE	308.296	0.244285	0.9655	FALSE
ENSG00000015520	NPC1L1	chr7:44552133-44580914	chr7:44578414-44583414	1.9636	1.78736	0.336237	FALSE	2.84177	-0.0279179	0.991915	FALSE	9.89825	-0.368427	0.824013	FALSE	597.934	0.37464	0.456782	FALSE	180.21	-0.455835	0.0707772	FALSE	78.792	0.0259962	0.970246	FALSE	21.5551	0.403072	0.553391	FALSE	420.727	0.220058	0.999947	FALSE	319.901	0.431426	0.999981	FALSE	45.6516	-0.127851	0.999877	FALSE	19.0085	0.374926	0.905321	FALSE
ENSG00000015532	XYLT2	chr17:48423452-48440499	chr17:48420952-48425952	3936.6	-0.00630638	0.985718	FALSE	4158.38	0.34577	0.0105739	FALSE	5173.09	-0.187775	0.829628	FALSE	20.9523	0.387123	0.676814	FALSE	591.96	0.205849	0.280825	FALSE	23.6445	0.612984	0.362911	FALSE	151.603	-0.049952	0.928224	FALSE	23.5811	-0.258354	0.999947	FALSE	834.578	0.0184709	0.999981	FALSE	19.2276	-0.241522	NA	FALSE	287.035	0.334434	0.906994	FALSE
ENSG00000015568	RGPD5	chr2:110550334-110615272	chr2:110547834-110552834	1008.69	-0.171265	0.531325	FALSE	846.022	0.109104	0.710355	FALSE	1274.38	-0.561508	0.280578	FALSE	0	NA	NA	FALSE	0	NA	NA	FALSE	0	NA	NA	FALSE	7.53339	-0.0153373	NA	FALSE	1.07404	-0.0198145	NA	FALSE	0.484614	-0.00725825	NA	FALSE	1.07404	-0.0298852	NA	FALSE	14.1407	0.0514433	NA	FALSE
ENSG00000015592	STMN4	chr8:27092839-27115937	chr8:27113437-27118437	1.11276	2.25968	0.434443	FALSE	1.43593	-1.64956	0.567302	FALSE	1.1097	0.329089	NA	FALSE	1521.86	0.0861552	0.866033	FALSE	49.1177	-0.295619	0.367878	FALSE	370.915	-0.0621567	0.905462	FALSE	12.0313	0.0729764	NA	FALSE	529.022	-0.0741677	0.999947	FALSE	136.489	-0.397202	0.999981	FALSE	134.128	-0.228777	0.999877	FALSE	3.3575	0.0394249	NA	FALSE
ENSG00000015676	NUDCD3	chr7:44418719-44530479	chr7:44527979-44532979	8099.87	0.106506	0.616082	FALSE	10134.4	0.606969	0.0631916	FALSE	9894.08	0.232357	0.498086	FALSE	142.319	0.549701	0.496096	FALSE	3787	0.235542	0.0186638	FALSE	24.1304	0.639129	0.341964	FALSE	295.142	-0.246686	0.562109	FALSE	236.45	0.359551	0.999947	FALSE	6725.18	0.257805	0.999981	FALSE	27.1483	-0.072012	0.999877	FALSE	496.069	0.359567	0.878494	FALSE
ENSG00000016082	ISL1	chr5:50678920-50690564	chr5:50676420-50681420	28.7677	-0.505187	0.292231	FALSE	125.351	-0.372536	0.0997767	FALSE	582.522	-0.850882	0.485424	FALSE	574.479	-1.14402	0.000789949	TRUE	69.0052	0.242296	0.482308	FALSE	275.692	-0.924423	0.00719788	FALSE	59.4302	0.130201	0.827705	FALSE	25.7681	-0.0285756	0.999947	FALSE	356.032	-0.172373	0.999981	FALSE	15.6353	0.225544	NA	FALSE	251.257	0.146574	0.983762	FALSE
ENSG00000016391	CHDH	chr3:53846361-53880417	chr3:53877917-53882917	309.182	0.604952	0.073722	FALSE	97.8552	0.338896	0.697268	FALSE	199.478	0.740535	0.410252	FALSE	343.467	-0.24767	0.744413	FALSE	470.47	0.160545	0.575408	FALSE	121.215	-0.409886	0.528951	FALSE	48.8466	0.351746	0.550406	FALSE	397.869	0.0253245	0.999947	FALSE	323.64	0.0672566	0.999981	FALSE	187.226	-0.553927	0.986222	FALSE	41.6425	0.42407	0.880201	FALSE
ENSG00000016402	IL20RA	chr6:137321107-137366298	chr6:137363798-137368798	14.9566	-2.48002	7.5747e-07	FALSE	3.38674	1.07505	0.474029	FALSE	3.29614	1.54298	NA	FALSE	1362.22	2.08025	1.51708e-08	TRUE	343.315	-0.448017	0.108444	FALSE	274.165	1.56424	1.60778e-05	TRUE	16.3461	0.333558	NA	FALSE	1044.95	-0.173616	0.999947	FALSE	579.036	0.136911	0.999981	FALSE	357.904	-0.62386	0.894879	FALSE	14.4552	0.304943	NA	FALSE
ENSG00000016490	CLCA1	chr1:86934050-86965972	chr1:86931550-86936550	1.17074	0.49305	0.910135	FALSE	0.106035	0.736349	NA	FALSE	4.75237	-1.82307	NA	FALSE	803.555	0.472943	0.335782	FALSE	166.643	-0.376832	0.116472	FALSE	102.411	0.133153	0.837094	FALSE	15.5289	0.599034	NA	FALSE	394.552	0.292002	0.999947	FALSE	303.321	0.0333809	0.999981	FALSE	49.9792	0.380005	0.999877	FALSE	8.85573	-0.0578295	NA	FALSE
ENSG00000016602	CLCA4	chr1:87012760-87046437	chr1:87010260-87015260	0.758391	1.49799	NA	FALSE	0.799558	0.844567	NA	FALSE	1.29824	-2.38694	NA	FALSE	2088.66	-0.369716	0.437336	FALSE	56.1075	0.12709	0.718361	FALSE	114.726	-0.173458	0.781914	FALSE	7.03692	0.155446	NA	FALSE	723.721	0.125037	0.999947	FALSE	142.738	0.226962	0.999981	FALSE	41.8051	0.323404	0.999877	FALSE	4.04579	-0.017407	NA	FALSE
ENSG00000016864	GLT8D1	chr3:52728504-52740048	chr3:52737548-52742548	4835.83	0.0915643	0.685001	FALSE	3427.48	0.226552	0.259368	FALSE	2617.59	-0.055387	0.944049	FALSE	15.3647	0.0768272	0.945486	FALSE	380.495	0.288436	0.0995218	FALSE	6.76872	0.206469	NA	FALSE	435.203	0.0173822	0.973377	FALSE	21.1082	0.149414	0.999947	FALSE	500.177	0.157406	0.999981	FALSE	10.4653	-0.124507	NA	FALSE	452.988	0.201859	0.977023	FALSE
ENSG00000017260	ATP2C1	chr3:130569438-130735556	chr3:130566938-130571938	9570.83	-0.478894	0.0437337	FALSE	9206.67	0.101319	0.740303	FALSE	11201.5	-0.0999762	0.794543	FALSE	1685.21	0.587661	0.204168	FALSE	3524.47	0.109108	0.509371	FALSE	302.195	1.225	0.0129449	TRUE	23.2047	-0.345629	0.608005	FALSE	613.961	-0.194396	0.999947	FALSE	6337.91	0.104869	0.999981	FALSE	35.4542	-0.137079	0.999877	FALSE	94.411	0.0715574	0.986935	FALSE
ENSG00000017373	SRCIN1	chr17:36686250-36762183	chr17:36759683-36764683	27.9864	-0.254032	0.716381	FALSE	19.9328	-0.475625	0.343479	FALSE	62.9236	-0.62643	0.648493	FALSE	3476.17	0.547397	0.170565	FALSE	368.984	-0.670721	0.00252337	TRUE	222.241	0.44175	0.314604	FALSE	48.3345	-0.388281	0.509041	FALSE	2210.64	-0.157113	0.999947	FALSE	708.683	-0.031867	0.999981	FALSE	245.406	-0.262563	0.999877	FALSE	86.757	0.256819	0.975111	FALSE
ENSG00000017427	IGF1	chr12:102789644-102874423	chr12:102871923-102876923	45.1587	-0.192389	0.829947	FALSE	39.2267	1.03095	0.148604	FALSE	93.8187	-0.591113	0.687641	FALSE	651.171	0.28134	0.615885	FALSE	686.744	-0.20435	0.314746	FALSE	19.2051	1.1354	0.080314	FALSE	48.444	-0.848193	0.0676478	FALSE	377.807	-0.358095	0.999947	FALSE	1779.36	0.423289	0.999981	FALSE	14.3001	-0.0506658	NA	FALSE	31.5297	-0.0391168	0.995211	FALSE
ENSG00000017483	SLC38A5	chrX:48316919-48328644	chrX:48326144-48331144	9.13681	0.328082	0.726913	FALSE	17.0773	0.722182	0.139236	FALSE	37.2534	1.42551	0.197978	FALSE	71.4601	0.695452	0.232179	FALSE	46.111	-0.0257417	0.951127	FALSE	35.6516	0.318833	0.639425	FALSE	9.88098	-0.160494	NA	FALSE	38.545	-0.0713428	0.999947	FALSE	87.355	0.0224368	0.999981	FALSE	17.7305	-0.216032	NA	FALSE	4.9032	0.295635	NA	FALSE
ENSG00000017621	MAGIX	chrX:49019060-49024822	chrX:49016560-49021560	105.28	0.36395	0.228778	FALSE	40.8223	3.33003	5.67147e-12	FALSE	113.042	0.189966	0.878684	FALSE	5.31403	0.530188	NA	FALSE	33.0232	0.292508	0.381527	FALSE	5.40524	0.857787	NA	FALSE	91.0482	-0.178402	0.735227	FALSE	5.97153	-0.197865	NA	FALSE	68.2875	0.315568	0.999981	FALSE	6.04476	-0.483433	NA	FALSE	52.9535	1.76186	7.35099e-06	TRUE
ENSG00000017797	RALBP1	chr18:9475006-9538114	chr18:9472506-9477506	7037.32	-0.406801	0.0246796	FALSE	8036.18	0.167839	0.550386	FALSE	8546.97	0.0282454	0.96261	FALSE	93.9106	0.609558	0.429651	FALSE	1583.86	0.161499	0.179549	FALSE	27.4444	1.00013	0.154536	FALSE	291.396	-0.592621	0.0845825	FALSE	143.62	0.446815	0.999947	FALSE	2923.24	0.262934	0.999981	FALSE	26.2382	0.00729121	0.999877	FALSE	503.694	0.507136	0.496468	FALSE
ENSG00000018189	RUFY3	chr4:71569920-71673032	chr4:71567420-71572420	4250.14	0.541608	0.0420891	FALSE	4915.7	0.0695357	0.734955	FALSE	2911.27	-0.431501	0.0499382	FALSE	148.208	0.540317	0.480063	FALSE	2846.05	0.208381	0.101547	FALSE	10.8208	0.694212	NA	FALSE	342.055	0.220877	0.563188	FALSE	175.739	0.254109	0.999947	FALSE	4946.93	-0.0902699	0.999981	FALSE	15.2492	-0.162613	NA	FALSE	754.214	0.0935172	0.986935	FALSE
ENSG00000018236	CNTN1	chr12:41086243-41466220	chr12:41083743-41088743	78.5191	-3.24808	2.25579e-05	TRUE	2551.2	0.917562	0.00845483	FALSE	1062.49	-2.21123	0.000230584	TRUE	5664.68	-0.857256	0.0282788	FALSE	1736.79	-0.636995	0.0275566	TRUE	186.927	-2.24191	1.07483e-10	TRUE	11.9872	-0.102354	NA	FALSE	2298.36	0.135384	0.999947	FALSE	5957.25	0.237329	0.999981	FALSE	146.651	-0.771534	0.698568	FALSE	20.4439	0.43659	0.808014	FALSE
ENSG00000018280	SLC11A1	chr2:219246751-219261617	chr2:219244251-219249251	64.8163	1.3553	0.000136109	TRUE	74.6176	-0.0374042	0.940681	FALSE	54.4092	0.00606475	0.997227	FALSE	149.322	0.547695	0.332562	FALSE	103.194	-0.35253	0.215581	FALSE	102.862	0.39865	0.442168	FALSE	24.7141	0.440721	0.515828	FALSE	89.0966	-0.201777	0.999947	FALSE	212.889	0.128645	0.999981	FALSE	37.4906	0.0178976	0.999877	FALSE	20.2186	-0.0814629	0.987278	FALSE
ENSG00000018408	WWTR1	chr3:149235021-149454501	chr3:149452001-149457001	11804.2	1.97673	4.96075e-06	TRUE	2376.38	-0.381682	0.00287999	FALSE	13744	0.243617	0.318916	FALSE	719.135	0.0577123	0.935231	FALSE	4797.62	0.503215	1.89358e-07	FALSE	7.05777	0.380057	NA	FALSE	178.947	-1.79935	8.83431e-06	TRUE	617.311	-0.0335971	0.999947	FALSE	8698.57	0.0550976	0.999981	FALSE	8.91517	0.186811	NA	FALSE	91.6054	-0.220484	0.977023	FALSE
ENSG00000018510	AGPS	chr2:178257371-178408564	chr2:178254871-178259871	11454.8	-0.644405	3.07338e-08	FALSE	8158.39	-0.00252144	0.991533	FALSE	9495.38	0.0408889	0.958009	FALSE	207.394	0.603209	0.4716	FALSE	4111.79	0.104829	0.476681	FALSE	8.31841	0.275965	NA	FALSE	250.971	-0.40955	0.369121	FALSE	302.038	0.270146	0.999947	FALSE	7552.76	0.0338919	0.999981	FALSE	14.5675	-0.160773	NA	FALSE	382.499	0.293401	0.934281	FALSE
ENSG00000018607	ZNF806	chr2:133066881-133076309	chr2:133064381-133069381	24.6331	1.28195	0.0050181	FALSE	60.6682	0.0401955	0.924439	FALSE	14.5852	1.49116	0.15038	FALSE	359.027	0.000955846	0.998854	FALSE	36.5947	-0.200767	0.56691	FALSE	184.549	0.0747298	0.898447	FALSE	12.7324	0.043143	NA	FALSE	120.803	0.0601838	0.999947	FALSE	90.1453	-0.30483	0.999981	FALSE	60.6733	0.136723	0.999877	FALSE	5.69972	-0.0526902	NA	FALSE
ENSG00000018610	CXorf56	chrX:118672111-118699397	chrX:118696897-118701897	1537.09	-0.261329	0.217929	FALSE	1795.13	0.182719	0.0254982	FALSE	1075.93	0.0650245	0.916445	FALSE	14.4698	0.391364	0.676041	FALSE	343.789	0.125499	0.50968	FALSE	18.007	0.739223	0.33008	FALSE	45.4287	-0.0878933	0.899541	FALSE	16.2003	0.069156	0.999947	FALSE	506.048	-0.0757884	0.999981	FALSE	6.75152	0.151704	NA	FALSE	41.4667	0.0999756	0.986935	FALSE
ENSG00000018625	ATP1A2	chr1:160085548-160113381	chr1:160083048-160088048	47.0446	-2.89768	1.72386e-05	FALSE	63.206	-2.88464	1.45464e-09	TRUE	84.436	-0.781454	0.300284	FALSE	413.377	1.22052	0.00233638	TRUE	272.472	-0.511038	0.0237438	FALSE	71.0914	1.11436	0.019154	TRUE	23.0916	0.00803762	0.992882	FALSE	118.624	0.457751	0.999947	FALSE	445.11	-0.471777	0.914752	FALSE	25.565	0.3039	0.999877	FALSE	9.67502	-0.140517	NA	FALSE
ENSG00000018699	TTC27	chr2:32853098-33046118	chr2:32850598-32855598	2125.08	-0.0927304	0.64951	FALSE	1704.1	0.256485	0.403452	FALSE	2558.14	-0.021102	0.977998	FALSE	286.353	0.302028	0.676179	FALSE	4425.32	0.0762463	0.507061	FALSE	7.70485	0.3326	NA	FALSE	65.5485	0.045403	0.941306	FALSE	330.993	0.403268	0.999947	FALSE	5987.89	-0.0761643	0.999981	FALSE	11.5608	0.374764	NA	FALSE	52.3524	0.0197669	0.997619	FALSE
ENSG00000018869	ZNF582	chr19:56887412-56904914	chr19:56902414-56907414	203.987	-0.171111	0.558134	FALSE	195.742	0.307668	0.236183	FALSE	429.259	-0.408651	0.0918646	FALSE	75.8585	0.700964	0.331574	FALSE	249.746	-0.452005	0.0362113	FALSE	26.2952	0.916597	0.150918	FALSE	151.941	-0.460662	0.339292	FALSE	45.333	0.245223	0.999947	FALSE	461.332	-0.171928	0.999981	FALSE	16.9049	0.313791	NA	FALSE	190.182	0.104843	0.986935	FALSE
ENSG00000019102	VSIG2	chr11:124617367-124622134	chr11:124619634-124624634	22.6088	1.30793	0.000660744	FALSE	11.641	-0.183713	0.894446	FALSE	34.5714	0.190392	0.880422	FALSE	11.8279	-0.178671	0.861676	FALSE	82.2981	-0.0149762	0.969443	FALSE	10.8696	-0.264121	NA	FALSE	58.4359	1.3724	0.0005934	TRUE	11.3298	0.216464	0.999947	FALSE	124.139	-0.0771162	0.999981	FALSE	13.5653	0.0628769	NA	FALSE	31.216	-0.114185	0.986935	FALSE
ENSG00000019144	PHLDB1	chr11:118477154-118528741	chr11:118474654-118479654	14681.3	-0.907472	1.18786e-05	FALSE	7810.11	0.00564838	0.979934	FALSE	11750.5	-0.335225	0.0491887	FALSE	60.0385	0.532651	0.548152	FALSE	2422.86	0.145828	0.277648	FALSE	8.40204	-0.138528	NA	FALSE	281.653	-0.253216	0.523738	FALSE	103.159	0.0168251	0.999947	FALSE	3108.65	-0.137171	0.999981	FALSE	17.5626	-0.0267673	NA	FALSE	360.861	0.350842	0.882614	FALSE
ENSG00000019169	MARCO	chr2:119699741-119752236	chr2:119697241-119702241	2.64636	3.71673	0.0081798	FALSE	128.884	-5.79029	5.08665e-43	TRUE	50.1321	-0.988849	0.622707	FALSE	3410.33	-0.21375	0.656682	FALSE	80.6643	-0.135695	0.713845	FALSE	472.785	-0.00997808	0.98744	FALSE	12.5817	0.0949502	NA	FALSE	831.582	-0.0220001	0.999947	FALSE	685.443	-1.11103	0.00363311	TRUE	123.221	0.048998	0.999877	FALSE	15.2316	-0.621518	0.382397	FALSE
ENSG00000019186	CYP24A1	chr20:52769987-52790512	chr20:52788012-52793012	75.2815	0.232223	0.709588	FALSE	28.7236	-0.653692	0.231981	FALSE	122.894	1.0885	0.137496	FALSE	117.452	0.129638	0.854062	FALSE	294.968	0.151834	0.550239	FALSE	36.6076	-0.146689	0.86053	FALSE	31.9476	-0.0697467	0.931936	FALSE	88.3124	0.271905	0.999947	FALSE	423.142	0.141349	0.999981	FALSE	34.7091	0.088556	0.999877	FALSE	20.7948	0.426574	0.851963	FALSE
ENSG00000019485	PRDM11	chr11:45115563-45247734	chr11:45113063-45118063	723.986	-0.43764	0.0133541	FALSE	578.568	0.369482	0.154485	FALSE	727.489	-0.0770803	0.903573	FALSE	2285.56	0.929826	0.00824125	FALSE	1941.32	-0.403742	0.0119182	FALSE	81.9562	1.90001	3.30561e-05	TRUE	126.359	-2.14627	3.55738e-08	TRUE	1259.79	0.339117	0.999947	FALSE	2120.69	-0.251879	0.999981	FALSE	41.7773	0.689129	0.841248	FALSE	43.613	-0.604762	0.571821	FALSE
ENSG00000019505	SYT13	chr11:45261851-45307870	chr11:45305370-45310370	254.169	1.12457	0.012103	TRUE	140.412	2.62104	0.0123069	TRUE	790.755	-1.08694	0.649826	FALSE	544.849	1.25955	0.000917608	TRUE	507.564	-0.0715911	0.735565	FALSE	158.21	1.06387	0.0080973	TRUE	26.872	0.377287	0.567902	FALSE	288.134	-0.00857819	0.999947	FALSE	849.145	0.0222859	0.999981	FALSE	98.6648	-0.332438	0.999877	FALSE	19.5288	0.468615	0.788643	FALSE
ENSG00000019549	SNAI2	chr8:49830248-49834299	chr8:49831799-49836799	1666.45	-0.33806	0.598542	FALSE	2774.04	-0.409627	0.205972	FALSE	9631.66	-0.688486	0.0218692	FALSE	6.53124	0.06896	0.952208	FALSE	114.069	0.260683	0.310768	FALSE	11.0219	0.262614	NA	FALSE	313.958	-1.03599	0.0160657	TRUE	13.3064	0.0341082	0.999947	FALSE	298.63	-0.309735	0.999981	FALSE	15.4593	-0.0729906	NA	FALSE	529.353	-0.588782	0.341703	FALSE
ENSG00000019582	CD74	chr5:149781199-149792492	chr5:149789992-149794992	1517.36	5.315	7.6598e-09	TRUE	22.1132	0.472793	0.616414	FALSE	46.5689	0.36919	0.909802	FALSE	32.2605	-0.244801	0.755468	FALSE	171.547	0.372853	0.149812	FALSE	56.243	0.130066	0.862871	FALSE	73.0048	1.59506	0.000137555	TRUE	29.892	0.0530194	0.999947	FALSE	269.381	0.0145878	0.999981	FALSE	45.9774	-0.108964	0.999877	FALSE	16.8448	0.421647	0.851963	FALSE
ENSG00000019991	HGF	chr7:81328321-81399754	chr7:81397254-81402254	2245.78	6.76921	1.0966e-42	TRUE	118.626	-1.52715	0.13728	FALSE	14.1774	1.05441	0.696647	FALSE	274.656	-0.47139	0.428804	FALSE	1060.5	0.254992	0.456798	FALSE	25.588	-0.64737	0.370049	FALSE	47.8479	0.857109	0.125302	FALSE	436.084	-0.440291	0.999947	FALSE	1348.4	0.43871	0.973917	FALSE	53.9429	-0.70961	0.818166	FALSE	14.9248	-0.0800592	0.986935	FALSE
ENSG00000019995	ZRANB1	chr10:126630691-126676758	chr10:126628191-126633191	7034.65	-1.03531	1.69542e-07	TRUE	6956.89	-0.245108	0.280205	FALSE	7977.4	-0.217057	0.722247	FALSE	61.0968	0.365369	0.659188	FALSE	1502.06	0.122368	0.398583	FALSE	6.85361	0.0274356	NA	FALSE	267.07	-0.0823345	0.911244	FALSE	97.6426	0.165026	0.999947	FALSE	2735.85	-0.226916	0.999981	FALSE	16.2005	-0.445813	NA	FALSE	270.793	-0.396429	0.834512	FALSE
ENSG00000020129	NCDN	chr1:36023073-36032875	chr1:36020573-36025573	3995.25	0.117121	0.555968	FALSE	2571.32	0.238422	0.175032	FALSE	5588.79	0.377884	0.346236	FALSE	10.6297	0.228186	0.825588	FALSE	401.668	0.228511	0.24066	FALSE	5.92735	0.241359	NA	FALSE	328.706	-0.0477658	0.918193	FALSE	21.4811	-0.146636	0.999947	FALSE	526.718	0.00788051	0.999981	FALSE	16.5034	-0.397614	NA	FALSE	428.909	0.135146	0.986126	FALSE
ENSG00000020181	GPR124	chr8:37641708-37702414	chr8:37639208-37644208	4878.81	0.618492	0.218047	FALSE	3780.14	0.634466	0.0121711	FALSE	1976.28	-0.837344	0.261862	FALSE	107.132	0.529041	0.4124	FALSE	1277.37	-0.250958	0.0705072	FALSE	8.65186	0.816111	NA	FALSE	231.402	-1.93873	1.87127e-07	TRUE	145.653	-0.159176	0.999947	FALSE	1491.09	0.0791039	0.999981	FALSE	8.83879	0.0717626	NA	FALSE	97.6942	0.170632	0.983306	FALSE
ENSG00000020219	CCT8L1P	chr7:152142561-152144235	chr7:152140061-152145061	0.442431	-2.40745	NA	FALSE	0.791396	-1.66616	NA	FALSE	0.512449	1.73944	NA	FALSE	3.80023	0.382477	NA	FALSE	7.21495	0.0301821	NA	FALSE	27.7564	0.665947	0.317135	FALSE	10.8357	0.215846	NA	FALSE	3.4936	-0.024407	NA	FALSE	9.11305	-0.0138922	NA	FALSE	12.0229	-0.397122	NA	FALSE	2.4271	0.0965329	NA	FALSE
ENSG00000020256	ZFP64	chr20:50668201-50820847	chr20:50818347-50823347	1754.6	-0.149552	0.683542	FALSE	843.107	-0.194865	0.175357	FALSE	2859.57	0.333502	0.17518	FALSE	550.579	0.236336	0.684885	FALSE	3479.51	-0.186028	0.159986	FALSE	106.685	0.0479566	0.9486	FALSE	11.4309	0.320387	NA	FALSE	479.338	0.0360768	0.999947	FALSE	4110.41	-0.0834663	0.999981	FALSE	47.1368	-0.0172134	0.999877	FALSE	6.45364	0.124188	NA	FALSE
ENSG00000020426	MNAT1	chr14:61201459-61436671	chr14:61198959-61203959	1883.15	-0.672395	0.000895539	FALSE	2162.94	0.20168	0.126571	FALSE	1038.2	-0.0899987	0.861863	FALSE	371.577	0.427327	0.527648	FALSE	3867.56	0.0276987	0.843865	FALSE	89.8099	0.0735863	0.912268	FALSE	95.9263	-0.171276	0.760658	FALSE	446.661	0.368417	0.999947	FALSE	6303.28	0.0383523	0.999981	FALSE	32.2166	0.0894173	0.999877	FALSE	86.4069	-0.186776	0.977409	FALSE
ENSG00000020577	SAMD4A	chr14:55033814-55260033	chr14:55031314-55036314	9744.78	-1.26183	0.000303638	TRUE	8115.41	-0.0449878	0.826618	FALSE	13943.6	-0.606821	0.139518	FALSE	326.775	0.696289	0.367905	FALSE	6313.21	-0.0446314	0.771425	FALSE	11.361	0.628844	NA	FALSE	865.045	-0.387495	0.356612	FALSE	444.104	0.0759494	0.999947	FALSE	11665.2	-0.228227	0.999981	FALSE	24.3609	-0.245422	0.999877	FALSE	1459.59	0.194511	0.977023	FALSE
ENSG00000020633	RUNX3	chr1:25226001-25291612	chr1:25289112-25294112	208.076	0.0174406	0.975061	FALSE	227.996	0.257787	0.325691	FALSE	717.055	0.34225	0.388711	FALSE	109.577	0.304284	0.651341	FALSE	1717.73	-0.130517	0.390042	FALSE	11.2634	0.732012	NA	FALSE	470.403	-0.410193	0.454405	FALSE	132.742	-0.121952	0.999947	FALSE	2756.54	0.141586	0.999981	FALSE	17.5485	-0.614715	NA	FALSE	633.481	0.244485	0.958525	FALSE
ENSG00000020922	MRE11A	chr11:94152894-94227074	chr11:94224574-94229574	2000.44	-0.20978	0.521436	FALSE	2927.34	0.0197441	0.947871	FALSE	1773.63	-0.101868	0.781578	FALSE	97.4197	0.354596	0.653236	FALSE	2237.98	0.177669	0.119108	FALSE	8.33288	0.0487506	NA	FALSE	189.223	-0.132481	0.82947	FALSE	136.627	0.29472	0.999947	FALSE	3387.74	-0.0751334	0.999981	FALSE	13.3422	-0.203572	NA	FALSE	224.312	0.0641259	0.988276	FALSE
ENSG00000021300	PLEKHB1	chr11:73357222-73373864	chr11:73354722-73359722	19.6214	0.659039	0.289121	FALSE	18.1538	-0.758145	0.198724	FALSE	64.1155	0.537108	0.622747	FALSE	292.103	0.554655	0.226005	FALSE	163.022	-0.125622	0.680004	FALSE	108.241	0.659619	0.128279	FALSE	20.1756	0.150255	0.841813	FALSE	170.289	-0.429835	0.999947	FALSE	283.335	0.0369978	0.999981	FALSE	104.508	-0.400547	0.999877	FALSE	8.028	-0.0848929	NA	FALSE
ENSG00000021355	SERPINB1	chr6:2832565-2842240	chr6:2839740-2844740	4008.4	-0.307473	0.346871	FALSE	2877.71	-0.19529	0.081655	FALSE	2138.59	0.135851	0.80157	FALSE	14.7762	0.467994	0.608433	FALSE	339.382	0.275694	0.141304	FALSE	10.8475	0.874947	NA	FALSE	365.566	-0.364449	0.422796	FALSE	22.288	-0.0749169	0.999947	FALSE	652.012	-0.172024	0.999981	FALSE	15.9173	-0.272853	NA	FALSE	414.337	0.0608531	0.987606	FALSE
ENSG00000021461	CYP3A43	chr7:99425635-99463718	chr7:99423135-99428135	1.49782	2.03398	0.331281	FALSE	0.83462	-0.541161	NA	FALSE	1.50333	-3.40966	NA	FALSE	1961.82	0.599576	0.210974	FALSE	143.636	-0.408172	0.111581	FALSE	286.032	0.103692	0.876259	FALSE	23.8299	-0.53509	0.408504	FALSE	885.247	0.602142	0.999947	FALSE	304.315	-0.138396	0.999981	FALSE	91.9545	0.788334	0.654122	FALSE	9.95665	-0.351552	NA	FALSE
ENSG00000021488	SLC7A9	chr19:33321414-33360672	chr19:33358172-33363172	6.48365	0.310627	0.767283	FALSE	8.59511	-0.267743	0.729291	FALSE	6.99907	-0.834756	0.582643	FALSE	509.308	0.352832	0.547901	FALSE	200.29	-0.543131	0.0115096	FALSE	41.7341	0.144706	0.851836	FALSE	12.353	0.186438	NA	FALSE	292.005	0.0336298	0.999947	FALSE	380.407	-0.147014	0.999981	FALSE	26.6908	-0.111438	0.999877	FALSE	7.80434	0.0892167	NA	FALSE
ENSG00000021574	SPAST	chr2:32288679-32382706	chr2:32286179-32291179	3213.71	-0.452027	0.0065985	FALSE	2719.42	0.305191	0.000115977	FALSE	2422.34	-0.199037	0.493458	FALSE	107.539	0.642365	0.3646	FALSE	1989.28	0.031582	0.833928	FALSE	6.65093	0.675325	NA	FALSE	167.401	0.0110068	0.982097	FALSE	142.154	0.146385	0.999947	FALSE	3238.32	-0.0131532	0.999981	FALSE	13.7526	0.0318017	NA	FALSE	279.406	0.319867	0.91847	FALSE
ENSG00000021645	NRXN3	chr14:78708733-80330762	chr14:78706233-78711233	26.0916	1.37302	0.00618456	FALSE	55.806	-0.566404	0.578401	FALSE	1457.67	-0.923297	0.211985	FALSE	17311.7	-0.85992	0.026414	FALSE	7844.51	-0.531772	8.18979e-06	FALSE	42.2868	-1.31062	0.0769077	FALSE	5.67279	0.122886	NA	FALSE	6600.2	-0.119559	0.999947	FALSE	12997.7	0.0365868	0.999981	FALSE	21.8814	-0.593977	NA	FALSE	2.33115	-0.0616769	NA	FALSE
ENSG00000021762	OSBPL5	chr11:3108345-3187969	chr11:3185469-3190469	2729.13	0.238929	0.299062	FALSE	2351.69	0.185156	0.0140117	FALSE	1130.64	-0.45006	0.666677	FALSE	123.196	0.333651	0.663225	FALSE	2276.14	0.0353133	0.829997	FALSE	20.6373	1.14668	0.10941	FALSE	171.381	-0.368096	0.368059	FALSE	167.404	-0.0904814	0.999947	FALSE	2860.99	0.0488251	0.999981	FALSE	28.6073	-0.446766	0.999877	FALSE	310.457	0.41534	0.758549	FALSE
ENSG00000021776	AQR	chr15:35147731-35262040	chr15:35259540-35264540	6464.72	0.265296	0.193007	FALSE	4256.84	0.262956	0.000482867	FALSE	8006.12	-0.257359	0.508618	FALSE	148.972	0.704232	0.372294	FALSE	3996.17	0.236565	0.0359843	FALSE	8.79415	0.631031	NA	FALSE	99.6638	-0.118967	0.818491	FALSE	191.896	0.251613	0.999947	FALSE	6328.41	-0.00128645	0.999981	FALSE	9.62914	0.0545316	NA	FALSE	99.3891	0.160272	0.985772	FALSE
ENSG00000021826	CPS1	chr2:211342405-211543831	chr2:211339905-211344905	3856.25	-0.0189664	0.950397	FALSE	2655.65	-0.0564629	0.800488	FALSE	2710.82	-0.733994	0.042784	FALSE	442.858	-0.213528	0.754035	FALSE	3658.84	0.0512046	0.68739	FALSE	6.574	0.227576	NA	FALSE	145.335	0.0283377	0.962446	FALSE	445.825	0.163715	0.999947	FALSE	4794.19	0.0220091	0.999981	FALSE	11.2876	0.221712	NA	FALSE	207.591	-0.0460573	0.990744	FALSE
ENSG00000021852	C8B	chr1:57394882-57431813	chr1:57429313-57434313	3.60737	-3.71038	0.000968146	FALSE	3.0149	-4.39864	0.00479763	FALSE	0.495555	2.45915	NA	FALSE	499.084	-0.802057	0.148628	FALSE	173.248	-0.698917	0.0141266	TRUE	39.8355	-0.496728	0.482991	FALSE	14.1716	0.138705	NA	FALSE	142.293	-0.126375	0.999947	FALSE	159.931	-0.573768	0.629505	FALSE	17.6203	-0.0747246	NA	FALSE	4.82754	-0.00589753	NA	FALSE
ENSG00000022267	FHL1	chrX:135229558-135293518	chrX:135227058-135232058	17215.4	-2.48427	5.72342e-19	TRUE	8342.54	0.465615	0.230714	FALSE	31667.9	-1.44357	1.58757e-15	TRUE	45.5335	0.639068	0.454335	FALSE	841.839	0.0724731	0.69397	FALSE	10.7338	0.323919	NA	FALSE	125.843	-0.627728	0.209586	FALSE	73.176	0.219015	0.999947	FALSE	1392.29	-0.26098	0.999981	FALSE	13.338	0.350091	NA	FALSE	209.53	-0.170786	0.977409	FALSE
ENSG00000022277	RTFDC1	chr20:55043646-55093943	chr20:55041146-55046146	7530.3	-0.410506	0.213815	FALSE	7990.9	0.222432	0.0999042	FALSE	5658.65	0.468301	0.0187162	FALSE	64.5248	0.502579	0.476077	FALSE	2091.74	-0.0489654	0.797292	FALSE	62.0778	0.0936388	0.904336	FALSE	186.242	-0.175673	0.73619	FALSE	77.7164	0.021535	0.999947	FALSE	2276.94	-0.216597	0.999981	FALSE	27.2627	0.376841	0.999877	FALSE	155.863	0.00203653	0.999773	FALSE
ENSG00000022355	GABRA1	chr5:161274196-161326975	chr5:161271696-161276696	19.6185	3.38842	1.3891e-05	FALSE	2.84935	-2.61362	0.169155	FALSE	2.71146	-1.49772	NA	FALSE	236.013	0.0879163	0.918102	FALSE	32.7268	0.323162	0.319239	FALSE	48.5828	-0.0256404	0.979234	FALSE	13.5847	-0.00292918	NA	FALSE	202.487	-0.305949	0.999947	FALSE	145.446	0.216914	0.999981	FALSE	43.9463	-0.620399	0.90249	FALSE	3.94643	-0.212398	NA	FALSE
ENSG00000022556	NLRP2	chr19:55464497-55512510	chr19:55461997-55466997	49.8191	0.603193	0.278771	FALSE	1774.85	1.7882	1.01798e-05	TRUE	3319.79	-0.0263522	0.996744	FALSE	2057.84	0.250418	0.654805	FALSE	137.718	-0.494265	0.0458574	FALSE	26.2871	0.460735	0.54772	FALSE	48.314	-0.0255908	0.972249	FALSE	758.035	-0.51085	0.999947	FALSE	631.827	0.479102	0.93618	FALSE	20.1303	-0.152821	NA	FALSE	19.0636	-0.133847	0.986935	FALSE
ENSG00000022567	SLC45A4	chr8:142217264-142318404	chr8:142315904-142320904	626.473	-0.705249	0.0567585	FALSE	466.907	0.333243	0.0232518	FALSE	1081.84	0.29932	0.601968	FALSE	2606.86	1.10203	0.171901	FALSE	1581.33	-0.610891	0.00836087	TRUE	170.674	0.642588	0.510255	FALSE	75.9385	-1.0458	0.0158847	TRUE	2547.38	-0.662957	0.999947	FALSE	1665.23	0.147516	0.999981	FALSE	141.656	-0.704341	0.827989	FALSE	120.589	0.393775	0.878494	FALSE
ENSG00000022840	RNF10	chr12:120971282-121015397	chr12:120968782-120973782	8199.01	-0.539168	0.000170192	FALSE	9561.23	-0.416387	2.42741e-14	FALSE	14200.9	-0.272022	0.400702	FALSE	55.2821	0.384683	0.652702	FALSE	1693.97	0.173236	0.170538	FALSE	12.5701	1.03688	NA	FALSE	262.871	-0.298252	0.46405	FALSE	83.1351	-0.016694	0.999947	FALSE	2604.96	-0.214895	0.999981	FALSE	17.0462	-0.220831	NA	FALSE	419.969	0.0192527	0.996841	FALSE
ENSG00000022976	ZNF839	chr14:102783713-102809044	chr14:102781213-102786213	1051.16	0.237203	0.046006	FALSE	908.025	0.0808444	0.57737	FALSE	868.794	0.0125291	0.987387	FALSE	32.3677	0.364265	0.657957	FALSE	725.487	0.228398	0.0978254	FALSE	5.87681	0.817146	NA	FALSE	287.737	-0.459679	0.222561	FALSE	36.0638	-0.164797	0.999947	FALSE	946.006	0.0287355	0.999981	FALSE	10.0155	-0.635453	NA	FALSE	305.08	0.17862	0.977409	FALSE
ENSG00000023041	ZDHHC6	chr10:114190057-114206672	chr10:114204172-114209172	2724.08	-0.192629	0.344372	FALSE	3634.6	-0.155277	0.452799	FALSE	4060.05	0.139929	0.83308	FALSE	22.8158	0.00184346	0.998593	FALSE	682.27	0.279007	0.0492073	FALSE	5.90223	0.207069	NA	FALSE	225.833	-0.270649	0.540013	FALSE	35.9397	0.269953	0.999947	FALSE	1167.31	-0.0588054	0.999981	FALSE	13.211	0.0695079	NA	FALSE	279.628	0.0619186	0.987846	FALSE
ENSG00000023171	GRAMD1B	chr11:123396343-123498482	chr11:123393843-123398843	372.386	1.23605	4.55162e-06	TRUE	556.425	-0.15095	0.631495	FALSE	1314.07	0.143263	0.874904	FALSE	1599.37	-0.488754	0.44586	FALSE	1376.14	0.404827	0.00158924	FALSE	107.435	-0.709535	0.214303	FALSE	14.2931	0.360024	NA	FALSE	376.939	0.49784	0.999947	FALSE	2307.21	-0.339533	0.999981	FALSE	27.5514	0.309372	0.999877	FALSE	12.2375	0.265026	NA	FALSE
ENSG00000023191	RNH1	chr11:494511-507300	chr11:504800-509800	17290.2	0.499927	0.0146749	FALSE	19969.2	0.0743568	0.552426	FALSE	13665	-0.0828055	0.921304	FALSE	18.552	0.818404	0.392308	FALSE	555.147	0.199567	0.240432	FALSE	7.49428	0.457606	NA	FALSE	591.013	-0.201987	0.661637	FALSE	35.1262	-0.17446	0.999947	FALSE	844.094	0.123803	0.999981	FALSE	16.4806	-0.320428	NA	FALSE	876.471	0.229571	0.956148	FALSE
ENSG00000023228	NDUFS1	chr2:206979540-207024327	chr2:207021827-207026827	13295.1	-0.344788	0.0242276	FALSE	11977.8	0.257734	1.5239e-06	FALSE	12706.5	-0.0213624	0.970736	FALSE	53.7116	0.646201	0.417667	FALSE	1695.66	0.209254	0.0807293	FALSE	7.36033	0.311889	NA	FALSE	346.054	-0.0983948	0.866411	FALSE	80.4595	0.19965	0.999947	FALSE	2697.79	0.0407017	0.999981	FALSE	13.3595	-0.0378484	NA	FALSE	376.408	0.0970966	0.986935	FALSE
ENSG00000023287	RB1CC1	chr8:53535015-53658403	chr8:53655903-53660903	10916.6	0.029343	0.895719	FALSE	9759.86	-0.21904	0.161362	FALSE	8667.56	-0.363606	0.201029	FALSE	230.526	0.475168	0.499009	FALSE	2986.41	0.20385	0.104259	FALSE	13.0442	0.0679205	NA	FALSE	84.6298	-0.204244	0.751304	FALSE	242.816	0.193271	0.999947	FALSE	4725.22	-0.305212	0.999981	FALSE	29.558	-0.307427	0.999877	FALSE	27.0776	0.268287	0.972714	FALSE
ENSG00000023318	ERP44	chr9:102741460-102861322	chr9:102858822-102863822	4813.65	-0.120176	0.803088	FALSE	1908.15	0.129888	0.493908	FALSE	4931.43	-0.525766	0.0657296	FALSE	646.209	0.550554	0.298257	FALSE	2412.09	0.00688267	0.964962	FALSE	8.11116	0.477927	NA	FALSE	188.632	-0.383265	0.404803	FALSE	484.524	0.0523045	0.999947	FALSE	4232.84	-0.101114	0.999981	FALSE	13.2297	-0.070903	NA	FALSE	210.349	0.00827026	0.999209	FALSE
ENSG00000023330	ALAS1	chr3:52232101-52248343	chr3:52229601-52234601	2005.25	-0.114785	0.759752	FALSE	2263.16	0.0456406	0.855226	FALSE	6439.07	0.317373	0.376831	FALSE	19.494	0.496626	0.595224	FALSE	710.588	0.316988	0.0369086	FALSE	9.47618	0.613178	NA	FALSE	116.891	-0.0763334	0.883919	FALSE	21.6353	0.118408	0.999947	FALSE	853.726	-0.133778	0.999981	FALSE	11.0229	0.0845098	NA	FALSE	127.758	0.249026	0.972714	FALSE
ENSG00000023445	BIRC3	chr11:102188214-102210134	chr11:102185714-102190714	419.088	0.716649	0.189472	FALSE	2245.76	-0.0560433	0.970059	FALSE	885.213	0.920049	0.241977	FALSE	41.653	0.310115	0.686438	FALSE	369.232	0.426524	0.0160727	FALSE	10.1635	0.0470024	NA	FALSE	90.3629	0.853163	0.0296774	FALSE	42.8856	0.237423	0.999947	FALSE	1122.45	0.0742654	0.999981	FALSE	10.8576	-0.119988	NA	FALSE	223.273	0.488395	0.711829	FALSE
ENSG00000023516	AKAP11	chr13:42846288-42897396	chr13:42843788-42848788	7232.7	0.766467	0.000521281	FALSE	4607.05	-0.112729	0.412259	FALSE	14765.1	0.128426	0.822466	FALSE	82.1373	0.52826	0.476163	FALSE	1780.47	0.377198	0.005377	FALSE	9.80211	-0.105404	NA	FALSE	301.284	0.525704	0.244638	FALSE	95.929	0.212099	0.999947	FALSE	2506.15	-0.114692	0.999981	FALSE	19.7758	-0.241645	NA	FALSE	340.986	0.103183	0.986935	FALSE
ENSG00000023572	GLRX2	chr1:193065597-193075244	chr1:193072744-193077744	897.068	-0.426355	0.129863	FALSE	922.931	-0.067102	0.843672	FALSE	1454.21	-0.257778	0.363606	FALSE	12.0762	0.313976	0.750237	FALSE	285.002	0.130681	0.578832	FALSE	9.64769	0.192251	NA	FALSE	194.911	-0.273618	0.562024	FALSE	18.5706	-0.00407516	0.999947	FALSE	423.766	-0.0584639	0.999981	FALSE	11.6225	-0.165823	NA	FALSE	256.518	0.170391	0.977409	FALSE
ENSG00000023608	SNAPC1	chr14:62229074-62263146	chr14:62226574-62231574	2321.05	-0.353723	0.447526	FALSE	14640.4	0.303389	0.0636873	FALSE	13785.6	0.152935	0.868505	FALSE	45.9963	0.650102	0.434715	FALSE	1235.56	0.296656	0.0554418	FALSE	8.26971	-0.0649383	NA	FALSE	244.829	0.0221267	0.969627	FALSE	69.8072	-0.178589	0.999947	FALSE	2493.21	-0.176321	0.999981	FALSE	15.0312	-0.235648	NA	FALSE	377.848	-0.215354	0.977023	FALSE
ENSG00000023697	DERA	chr12:16064105-16190220	chr12:16061605-16066605	2898.08	-0.581067	0.0733268	FALSE	4792.97	0.536558	0.254202	FALSE	4131.15	-0.223771	0.222522	FALSE	196.73	0.399169	0.580637	FALSE	2807.98	0.0938103	0.444687	FALSE	6.51852	0.319709	NA	FALSE	159.299	0.0446531	0.937338	FALSE	359.707	0.5858	0.999947	FALSE	7194.39	0.318396	0.999981	FALSE	20.208	0.205602	NA	FALSE	393.33	0.36258	0.880201	FALSE
ENSG00000023734	STRAP	chr12:16035324-16056412	chr12:16032824-16037824	9189.17	-0.408406	0.112221	FALSE	9499.02	0.494754	0.000116319	FALSE	9725.34	0.10827	0.825312	FALSE	24.9905	0.686304	0.447158	FALSE	816.612	0.186066	0.259837	FALSE	10.3218	0.229017	NA	FALSE	477.889	-0.173026	0.735038	FALSE	59.1856	0.514638	0.999947	FALSE	1916.6	0.407198	0.999981	FALSE	24.855	0.00231993	0.999877	FALSE	527.306	0.542225	0.610082	FALSE
ENSG00000023839	ABCC2	chr10:101542488-101611949	chr10:101539988-101544988	49.2696	-0.538627	0.230409	FALSE	25.3213	-0.619402	0.259368	FALSE	210.058	0.105039	0.957643	FALSE	512.976	-0.298007	0.605146	FALSE	660.044	0.0787833	0.679115	FALSE	8.74075	0.291164	NA	FALSE	126.641	-0.430936	0.372663	FALSE	356.996	0.158061	0.999947	FALSE	966.812	-0.10477	0.999981	FALSE	9.62412	-0.0146776	NA	FALSE	93.8926	-0.53731	0.650361	FALSE
ENSG00000023892	DEF6	chr6:35265594-35289548	chr6:35263094-35268094	745.229	0.871772	0.00872204	FALSE	1131.21	0.0208893	0.936036	FALSE	604.356	0.631361	0.00776317	FALSE	130.493	-1.18271	0.121643	FALSE	573.083	0.504988	0.0533018	FALSE	8.10778	0.105618	NA	FALSE	102.583	0.466537	0.430409	FALSE	55.9445	-0.0066536	0.999947	FALSE	913.873	-0.0134853	0.999981	FALSE	11.8302	-0.227488	NA	FALSE	125.799	0.144886	0.986935	FALSE
ENSG00000023902	PLEKHO1	chr1:150121372-150136916	chr1:150118872-150123872	3872.1	-0.611096	0.0952585	FALSE	4828.16	-0.46341	0.0732875	FALSE	7452.44	-0.185421	0.60034	FALSE	19.3308	0.753262	0.421544	FALSE	540.877	0.374893	0.0416102	FALSE	8.50432	0.513209	NA	FALSE	440.236	-0.239783	0.621504	FALSE	35.4647	0.0200062	0.999947	FALSE	773.843	-0.249088	0.999981	FALSE	14.8051	-0.0277866	NA	FALSE	780.133	0.0265627	0.995551	FALSE
ENSG00000023909	GCLM	chr1:94350760-94374966	chr1:94372466-94377466	2607.71	-1.10081	7.2949e-05	TRUE	3827.58	-0.0310387	0.948001	FALSE	8590.23	0.431684	0.526152	FALSE	35.8056	0.465473	0.594208	FALSE	746.504	0.00952828	0.968312	FALSE	26.4032	1.32571	0.0314906	TRUE	167.587	-0.610371	0.0850966	FALSE	56.3273	0.152224	0.999947	FALSE	1485.1	-0.0606094	0.999981	FALSE	30.2819	0.122254	0.999877	FALSE	362.573	-0.0300049	0.995382	FALSE
ENSG00000024048	UBR2	chr6:42531799-42661242	chr6:42529299-42534299	6519.94	0.142593	0.413566	FALSE	5369.93	0.0381899	0.711659	FALSE	5896.35	-0.239678	0.240259	FALSE	164.237	0.574092	0.472519	FALSE	4460.99	0.214165	0.0671655	FALSE	19.0662	0.401425	0.637181	FALSE	256.566	-0.634079	0.116088	FALSE	230.532	0.221571	0.999947	FALSE	7589.12	-0.0694499	0.999981	FALSE	16.6232	-0.0761808	NA	FALSE	281.452	0.117318	0.986935	FALSE
ENSG00000024422	EHD2	chr19:48216599-48246391	chr19:48214099-48219099	5989.22	-0.518705	0.201051	FALSE	2438.17	-0.345728	0.0601514	FALSE	42217.1	-0.200867	0.668629	FALSE	38.2806	0.154577	0.877653	FALSE	1113.95	0.153536	0.344788	FALSE	16.0378	0.430039	0.635639	FALSE	116.867	-0.727071	0.070465	FALSE	54.6273	-0.0385367	0.999947	FALSE	1775.48	-0.0736699	0.999981	FALSE	11.9747	-0.0334932	NA	FALSE	151.909	-0.172616	0.980415	FALSE
ENSG00000024526	DEPDC1	chr1:68939834-68962904	chr1:68960404-68965404	4923.59	-0.867918	0.144145	FALSE	5176.72	0.524955	0.0355813	FALSE	7753.39	-0.228634	0.388847	FALSE	29.5121	0.359223	0.673133	FALSE	762.415	0.50591	0.000172046	FALSE	19.0037	0.22833	0.802161	FALSE	123.829	0.0402246	0.950626	FALSE	39.4146	0.12011	0.999947	FALSE	1292.51	0.267892	0.999981	FALSE	12.8723	-0.120599	NA	FALSE	206.8	0.367377	0.891557	FALSE
ENSG00000024862	CCDC28A	chr6:139094656-139114456	chr6:139092156-139097156	1038.73	0.162534	0.676348	FALSE	944.496	0.0831043	0.727691	FALSE	564.942	-0.355415	0.440675	FALSE	29.6346	-0.195272	0.840305	FALSE	550.57	0.221105	0.222258	FALSE	9.32614	-0.244964	NA	FALSE	234.833	-0.0288638	0.95872	FALSE	38.4912	0.143371	0.999947	FALSE	838.967	-0.138553	0.999981	FALSE	13.0085	0.0629028	NA	FALSE	168.816	-0.00300101	0.999759	FALSE
ENSG00000025039	RRAGD	chr6:90074354-90121989	chr6:90119489-90124489	1098.61	-0.867495	0.111089	FALSE	2653.02	-0.970097	1.98606e-09	FALSE	3145.16	0.0228578	0.98786	FALSE	796.748	1.26172	0.00775408	TRUE	502.797	-0.388519	0.196577	FALSE	201.905	1.15214	0.0172049	TRUE	113.608	-1.04687	0.0201083	TRUE	227.145	0.274301	0.999947	FALSE	1217.03	-0.265494	0.999981	FALSE	67.1858	0.168057	0.999877	FALSE	235.402	-0.18989	0.977409	FALSE
ENSG00000025156	HSF2	chr6:122720690-122754264	chr6:122718190-122723190	1703.93	-0.452876	0.00908999	FALSE	1478.52	0.16002	0.0829982	FALSE	1442.21	-0.193048	0.699974	FALSE	46.9497	0.279066	0.753238	FALSE	988.008	0.15218	0.254138	FALSE	10.8978	-0.270471	NA	FALSE	253.399	-0.227058	0.660283	FALSE	62.1618	0.104409	0.999947	FALSE	1730.73	0.0349919	0.999981	FALSE	9.66865	-0.129427	NA	FALSE	309.016	0.152874	0.980741	FALSE
ENSG00000025293	PHF20	chr20:34359895-34538303	chr20:34357395-34362395	4323.69	-0.616795	0.000767666	FALSE	3829.99	-0.0288085	0.884038	FALSE	5623.5	0.345912	0.344029	FALSE	206.417	0.633102	0.415534	FALSE	5372.31	-0.0742039	0.630735	FALSE	7.77252	0.391443	NA	FALSE	433.657	-0.0645283	0.922433	FALSE	274.604	-0.000338535	0.999947	FALSE	7148.51	-0.156468	0.999981	FALSE	18.7901	-0.079738	NA	FALSE	493.016	0.0692602	0.986935	FALSE
ENSG00000025423	HSD17B6	chr12:57145944-57181574	chr12:57143444-57148444	362.204	-2.09168	5.62778e-10	TRUE	206.286	0.430467	0.0593199	FALSE	440.292	-0.402267	0.155016	FALSE	340.035	1.61584	0.000658597	TRUE	281.541	-0.675924	0.00560876	TRUE	10.5727	0.39358	NA	FALSE	82.4432	0.109695	0.85456	FALSE	296.214	0.050219	0.999947	FALSE	368.083	0.0562594	0.999981	FALSE	13.8005	0.021281	NA	FALSE	108.637	0.486301	0.736484	FALSE
ENSG00000025434	NR1H3	chr11:47269850-47290396	chr11:47267350-47272350	630.557	0.4126	0.0410521	FALSE	549.505	0.327092	0.224911	FALSE	855.44	0.0832089	0.958813	FALSE	34.8059	0.171221	0.850723	FALSE	333.363	0.345972	0.0792163	FALSE	5.25302	0.524812	NA	FALSE	214.757	-0.500537	0.16	FALSE	33.0873	-0.0228297	0.999947	FALSE	599.914	0.0241172	0.999981	FALSE	9.07416	-0.134204	NA	FALSE	217.28	0.107527	0.986935	FALSE
ENSG00000025708	TYMP	chr22:50964180-50968485	chr22:50965985-50970985	482.892	0.909431	0.0440859	FALSE	673.628	-0.233064	0.129337	FALSE	167.614	0.0917569	0.880778	FALSE	13.9883	-0.298241	0.757876	FALSE	65.7109	0.2552	0.399541	FALSE	28.8367	-0.54104	0.503913	FALSE	235.843	0.262302	0.723036	FALSE	13.3137	0.0875384	0.999947	FALSE	136.547	0.29293	0.999981	FALSE	30.5297	-0.251451	0.999877	FALSE	161.2	0.191777	0.977409	FALSE
ENSG00000025770	NCAPH2	chr22:50946644-50961901	chr22:50944144-50949144	2687.54	-0.0527183	0.905637	FALSE	3290.59	0.238083	0.0680114	FALSE	1933.33	0.137066	0.673185	FALSE	14.3626	0.433214	0.642085	FALSE	532.519	0.134827	0.558677	FALSE	5.73229	0.667914	NA	FALSE	218.854	-0.193654	0.682062	FALSE	15.6396	0.194972	0.999947	FALSE	632.817	0.0296889	0.999981	FALSE	9.4461	-0.0556308	NA	FALSE	346.053	0.271933	0.946367	FALSE
ENSG00000025772	TOMM34	chr20:43570770-43589127	chr20:43586627-43591627	4620.1	0.0994862	0.779784	FALSE	2973.08	-0.18054	0.533216	FALSE	8176.85	0.773784	6.16107e-05	FALSE	26.5296	0.634617	0.471199	FALSE	954.217	0.0630873	0.759187	FALSE	7.35641	0.250123	NA	FALSE	171.012	0.191571	0.705208	FALSE	37.9615	0.0240857	0.999947	FALSE	1245.89	-0.106362	0.999981	FALSE	11.1101	0.0530465	NA	FALSE	210.839	0.0846403	0.986935	FALSE
ENSG00000025796	SEC63	chr6:108188959-108279393	chr6:108276893-108281893	2542.04	0.317055	0.498784	FALSE	1681.61	-0.308841	0.0646279	FALSE	7749.55	-0.181346	0.496999	FALSE	107.277	0.653131	0.422731	FALSE	2528.43	0.126075	0.336429	FALSE	20.552	0.240732	0.780268	FALSE	305.297	-0.623683	0.141297	FALSE	144.309	0.132835	0.999947	FALSE	3876.63	-0.0619771	0.999981	FALSE	19.5526	-0.260569	NA	FALSE	313.223	0.203134	0.977023	FALSE
ENSG00000025800	KPNA6	chr1:32573638-32642169	chr1:32571138-32576138	10020.5	-0.39386	0.0253953	FALSE	8105.38	-0.153706	0.236375	FALSE	22020.6	-0.141151	0.605357	FALSE	78.6902	0.475695	0.574512	FALSE	1896.02	0.230612	0.0456203	FALSE	7.09618	0.0764114	NA	FALSE	251.871	-0.351168	0.43711	FALSE	104.325	0.113812	0.999947	FALSE	2922.94	-0.225089	0.999981	FALSE	9.33809	-0.0397382	NA	FALSE	292.639	-0.02141	0.99662	FALSE
ENSG00000026025	VIM	chr10:17270257-17279592	chr10:17267757-17272757	287494	-0.0932941	0.731262	FALSE	210438	0.432843	0.0794459	FALSE	435234	0.111062	0.861368	FALSE	13.9186	0.753768	0.439584	FALSE	344.147	0.309415	0.0985296	FALSE	7.75044	0.652793	NA	FALSE	1012.71	-0.14308	0.766495	FALSE	44.6416	-0.309533	0.999947	FALSE	1025.89	0.038485	0.999981	FALSE	24.1127	-0.402472	0.999877	FALSE	1348.22	0.217684	0.963033	FALSE
ENSG00000026036	RTEL1-TNFRSF6B	chr20:62290652-62330037	chr20:62288152-62293152	3188.88	-0.023624	0.957548	FALSE	2895.88	-0.152795	0.25961	FALSE	2307.64	0.61797	0.00948334	FALSE	49.4781	0.623464	0.475657	FALSE	1622.21	0.0748733	0.762103	FALSE	8.54734	-0.13256	NA	FALSE	132.279	-0.0859113	0.872892	FALSE	68.6068	-0.145448	0.999947	FALSE	2222.22	0.0609028	0.999981	FALSE	11.6726	0.155268	NA	FALSE	240.626	0.264151	0.955077	FALSE
ENSG00000026103	FAS	chr10:90750413-90775542	chr10:90747913-90752913	3679.97	0.904308	0.000993056	FALSE	5314.08	-0.466511	0.0333051	FALSE	10807.7	0.137517	0.770374	FALSE	42.0908	0.331944	0.688959	FALSE	792.93	0.459375	0.00353974	FALSE	9.2253	0.385678	NA	FALSE	313.589	0.00445695	0.994163	FALSE	58.0305	-0.0184539	0.999947	FALSE	1828.78	-0.0969274	0.999981	FALSE	13.7814	-0.292502	NA	FALSE	650.743	-0.14112	0.980741	FALSE
ENSG00000026297	RNASET2	chr6:167342991-167370679	chr6:167368179-167373179	2043.27	-1.04815	0.000570084	TRUE	2702.66	0.218462	0.210104	FALSE	1221.73	-0.175708	0.682331	FALSE	64.1541	0.495732	0.473588	FALSE	578.857	-0.181882	0.398691	FALSE	19.5157	0.522364	0.514376	FALSE	98.8098	-0.2665	0.641242	FALSE	59.0532	0.0514324	0.999947	FALSE	831.503	-0.309964	0.999981	FALSE	15.4421	-0.0853646	NA	FALSE	177.89	0.146214	0.986935	FALSE
ENSG00000026508	CD44	chr11:35160416-35253949	chr11:35157916-35162916	9316.76	1.08839	0.000306	TRUE	13347.1	-0.0224942	0.973341	FALSE	34827.3	0.67511	0.0693016	FALSE	507.718	-0.912164	0.0530866	FALSE	2349.94	0.519799	4.79793e-05	FALSE	37.3044	-1.82257	0.00138666	TRUE	181.115	0.898583	0.0284613	FALSE	190.716	0.191074	0.999947	FALSE	6081.45	-0.0550112	0.999981	FALSE	17.6083	-0.166579	NA	FALSE	469.185	0.212612	0.977023	FALSE
ENSG00000026559	KCNG1	chr20:49620192-49639666	chr20:49637166-49642166	338.733	1.19138	0.00362935	TRUE	524.344	0.427548	0.281113	FALSE	5.6837	-0.0122112	0.998254	FALSE	186.148	-1.75419	0.00220543	TRUE	396.159	0.0495273	0.881802	FALSE	110.783	-0.46846	0.499821	FALSE	81.828	-0.350768	0.558118	FALSE	144.28	-0.15228	0.999947	FALSE	298.405	-0.0808378	0.999981	FALSE	115.094	-0.125309	0.999877	FALSE	88.9704	0.0435586	0.994286	FALSE
ENSG00000026652	AGPAT4	chr6:161551010-161695093	chr6:161692593-161697593	1839.43	0.0867731	0.863155	FALSE	1190.71	0.0813616	0.546651	FALSE	994.531	-0.293965	0.395795	FALSE	218.755	0.401447	0.577776	FALSE	3730.46	0.233972	0.0210968	FALSE	12.3487	-0.266668	NA	FALSE	503.238	0.238905	0.672204	FALSE	251.148	0.159203	0.999947	FALSE	4987.39	-0.136815	0.999981	FALSE	16.7393	0.12676	NA	FALSE	324.695	-0.0760335	0.986935	FALSE
ENSG00000026751	SLAMF7	chr1:160709036-160724611	chr1:160706536-160711536	3283.47	-2.63489	1.01996e-06	TRUE	3863.61	-0.925387	0.000152104	FALSE	11503	-1.08371	0.000134278	TRUE	135.112	3.07787	8.2464e-13	TRUE	260.743	-0.719064	0.00402452	TRUE	18.431	2.24857	0.000375859	FALSE	81.2795	-0.8238	0.0523936	FALSE	31.6891	0.31077	0.999947	FALSE	746.485	-0.25453	0.999981	FALSE	11.4619	0.150481	NA	FALSE	123.186	-0.379017	0.899695	FALSE
ENSG00000026950	BTN3A1	chr6:26402464-26415444	chr6:26399964-26404964	2379.7	0.671149	4.62548e-05	FALSE	2278.91	-0.44882	0.0564379	FALSE	808.572	0.541911	0.15464	FALSE	25.3593	-0.181678	0.840418	FALSE	332.476	0.306201	0.0820677	FALSE	7.95927	-0.264786	NA	FALSE	116.966	-0.370595	0.475432	FALSE	18.4234	0.143676	0.999947	FALSE	504.261	-0.112847	0.999981	FALSE	9.15644	-0.0524454	NA	FALSE	119.198	-0.19678	0.977409	FALSE
ENSG00000027001	MIPEP	chr13:24304327-24463558	chr13:24461058-24466058	1465.78	0.786109	0.000337328	FALSE	1567.71	-0.431004	2.17846e-06	FALSE	1646.28	0.163913	0.772415	FALSE	447.377	-0.237107	0.701405	FALSE	3021.72	0.181154	0.149603	FALSE	5.51905	0.14686	NA	FALSE	175.479	0.312285	0.497881	FALSE	337.982	0.0870995	0.999947	FALSE	5251.8	-0.277437	0.999981	FALSE	7.94632	-0.0802498	NA	FALSE	226.724	0.115787	0.986935	FALSE
ENSG00000027075	PRKCH	chr14:61654276-62017694	chr14:61651776-61656776	303.719	0.0412223	0.918841	FALSE	484.341	-0.931782	0.00198113	FALSE	772.952	-0.136776	0.844645	FALSE	4312.16	0.517293	0.209396	FALSE	3721.98	0.0401472	0.797865	FALSE	11.2389	0.132916	NA	FALSE	49.8018	0.107069	0.874901	FALSE	2694.04	0.1319	0.999947	FALSE	6900.56	-0.160789	0.999981	FALSE	9.27871	0.0598618	NA	FALSE	144.15	0.613497	0.480636	FALSE
ENSG00000027644	INSRR	chr1:156809854-156828810	chr1:156826310-156831310	2.92443	1.76269	0.261435	FALSE	6.0746	0.368043	0.79372	FALSE	9.57378	-1.15637	0.450842	FALSE	389.245	-0.0939033	0.864014	FALSE	120.035	-0.385301	0.133438	FALSE	268.675	-0.403084	0.342832	FALSE	17.0335	0.02215	0.978432	FALSE	212.549	0.171617	0.999947	FALSE	132.078	-0.0186855	0.999981	FALSE	186.03	-0.438054	0.999877	FALSE	22.468	0.614204	0.518687	FALSE
ENSG00000027697	IFNGR1	chr6:137518620-137540586	chr6:137538086-137543086	4494.79	-0.82173	0.0546134	FALSE	3204.17	-0.127807	0.373745	FALSE	3451.52	-0.145135	0.77347	FALSE	33.2475	0.572798	0.522201	FALSE	607.585	0.032788	0.869749	FALSE	19.4995	0.936993	0.20495	FALSE	249.792	-0.356749	0.463579	FALSE	48.3742	0.227626	0.999947	FALSE	998.37	-0.112705	0.999981	FALSE	19.7496	-0.0861565	NA	FALSE	261.044	0.134824	0.986935	FALSE
ENSG00000027847	B4GALT7	chr5:177027100-177037348	chr5:177024600-177029600	2063.61	-0.511784	0.0254541	FALSE	2057.5	0.12373	0.377178	FALSE	1818.33	0.0939443	0.858611	FALSE	16.0443	-0.0862972	0.937676	FALSE	292.45	0.0880766	0.709942	FALSE	7.22185	0.096463	NA	FALSE	180.633	-0.276439	0.529548	FALSE	27.4623	-0.168559	0.999947	FALSE	412.622	-0.0620756	0.999981	FALSE	12.4132	-0.14547	NA	FALSE	251.708	0.201404	0.977023	FALSE
ENSG00000027869	SH2D2A	chr1:156776034-156786654	chr1:156784154-156789154	23.8161	2.47011	9.04564e-07	FALSE	5.33701	0.329702	0.794515	FALSE	84.7602	2.54482	0.0029558	TRUE	47.5893	-0.468066	0.512764	FALSE	191.119	0.0895015	0.771377	FALSE	22.1284	-0.280211	0.749677	FALSE	46.4549	1.11471	0.0292508	TRUE	25.6736	-0.0639178	0.999947	FALSE	231.106	0.0616172	0.999981	FALSE	11.8823	0.0809672	NA	FALSE	33.0321	0.055827	0.990605	FALSE
ENSG00000028116	VRK2	chr2:58134785-58387055	chr2:58132285-58137285	2673.32	-0.44056	0.0295544	FALSE	2106.12	-0.112285	0.541289	FALSE	4920.12	-0.23164	0.238303	FALSE	778.569	0.283347	0.640512	FALSE	3970.17	0.121108	0.406429	FALSE	17.9359	0.317768	0.741802	FALSE	19.3735	0.335094	0.617481	FALSE	947.546	0.0488188	0.999947	FALSE	6980.11	0.126975	0.999981	FALSE	12.7191	-0.0444376	NA	FALSE	18.1182	-0.0989568	0.986935	FALSE
ENSG00000028137	TNFRSF1B	chr1:12227059-12269285	chr1:12224559-12229559	270.492	2.10151	9.73245e-12	TRUE	129.114	-0.606796	0.402055	FALSE	238.902	2.84722	0.089143	FALSE	483.027	-0.9677	0.00936326	FALSE	373.358	0.0707249	0.779388	FALSE	89.4135	-0.583806	0.242435	FALSE	61.3813	0.748858	0.0871068	FALSE	247.278	-0.143187	0.999947	FALSE	623.617	0.00119659	0.999981	FALSE	65.0084	-0.317206	0.999877	FALSE	72.8642	0.354729	0.929716	FALSE
ENSG00000028203	VEZT	chr12:95611521-95696566	chr12:95609021-95614021	5477.56	-0.543237	0.00144434	FALSE	4691.55	-0.331487	0.171951	FALSE	9154.96	-0.0273789	0.973521	FALSE	126.547	0.468233	0.567998	FALSE	2352.28	0.0621137	0.655459	FALSE	9.01143	0.445316	NA	FALSE	322.167	-0.213268	0.656342	FALSE	162.658	0.263534	0.999947	FALSE	4654.72	-0.0654404	0.999981	FALSE	17.0598	-0.153083	NA	FALSE	507.274	0.109112	0.986935	FALSE
ENSG00000028277	POU2F2	chr19:42590262-42700737	chr19:42698237-42703237	65.4932	1.57734	7.48919e-07	TRUE	130.999	-0.661709	0.0062127	FALSE	1053.31	-0.937165	0.173085	FALSE	4092.57	-0.101768	0.864099	FALSE	823.792	0.043528	0.867679	FALSE	15.6748	-1.18839	0.0916175	FALSE	17.928	0.431132	0.52587	FALSE	1454.52	-0.110648	0.999947	FALSE	2180.1	0.00246786	0.999981	FALSE	7.54696	-0.181595	NA	FALSE	18.0243	0.309643	0.942198	FALSE
ENSG00000028310	BRD9	chr5:850405-892939	chr5:890439-895439	3611.31	0.0303603	0.911612	FALSE	3371.42	0.175633	0.000939615	FALSE	2767.53	0.08558	0.906254	FALSE	315.724	-0.475798	0.395396	FALSE	1582.67	0.204955	0.142371	FALSE	8.98332	0.312552	NA	FALSE	331.357	0.267806	0.586813	FALSE	163.994	0.0654177	0.999947	FALSE	2019.52	0.00101226	0.999981	FALSE	15.8152	-0.250957	NA	FALSE	508.351	0.40311	0.77604	FALSE
ENSG00000028528	SNX1	chr15:64386321-64438289	chr15:64383821-64388821	6043.87	0.253177	0.137433	FALSE	4812.21	-0.0213144	0.955491	FALSE	7386.48	-0.292248	0.0858052	FALSE	64.9417	0.525307	0.55026	FALSE	1867.87	0.22866	0.0473566	FALSE	6.97876	0.46182	NA	FALSE	343.447	-0.409556	0.325186	FALSE	81.0981	0.0261673	0.999947	FALSE	2630.99	-0.0426894	0.999981	FALSE	14.153	-0.263031	NA	FALSE	338.465	0.0373615	0.994286	FALSE
ENSG00000028839	TBPL1	chr6:134273307-134311570	chr6:134270807-134275807	2222.13	-0.239144	0.434835	FALSE	1347.31	0.336473	0.016998	FALSE	2149.78	0.0360087	0.973521	FALSE	55.9531	0.516405	0.529304	FALSE	815.844	0.274965	0.0771154	FALSE	13.0453	0.530786	NA	FALSE	409.028	-0.569684	0.143983	FALSE	100.809	0.0143612	0.999947	FALSE	1694.09	0.0819162	0.999981	FALSE	18.9025	-0.348765	NA	FALSE	420.753	0.26306	0.951685	FALSE
ENSG00000029153	ARNTL2	chr12:27485786-27576241	chr12:27483286-27488286	2728.04	-0.996893	0.00367149	FALSE	4202.83	0.825974	0.060218	FALSE	5107.16	0.560937	0.0677885	FALSE	175.179	0.203806	0.77348	FALSE	1600.28	0.0178873	0.914555	FALSE	12.9998	-0.27093	NA	FALSE	278.342	1.16526	0.000143895	TRUE	268.88	0.313542	0.999947	FALSE	4286.82	0.581632	0.568604	FALSE	35.2946	-0.19097	0.999877	FALSE	744.417	0.863674	0.0905378	FALSE
ENSG00000029363	BCLAF1	chr6:136578000-136610989	chr6:136608489-136613489	18444.9	-0.0420598	0.825157	FALSE	11630.5	0.250022	3.42252e-06	FALSE	16046.2	0.0156918	0.98857	FALSE	55.5645	0.770748	0.323323	FALSE	1312.73	0.343834	0.0142311	FALSE	9.20929	0.578226	NA	FALSE	915.498	-0.171629	0.738269	FALSE	82.965	0.0923622	0.999947	FALSE	2554.81	0.000136238	0.999981	FALSE	23.704	-0.237328	0.999877	FALSE	873.697	0.0865673	0.986935	FALSE
ENSG00000029364	SLC39A9	chr14:69864731-69929105	chr14:69862231-69867231	14361.8	-0.330252	0.0147545	FALSE	9149.33	0.120848	0.565031	FALSE	19698.5	-0.127636	0.832005	FALSE	80.0361	0.425993	0.607703	FALSE	1641.37	0.201001	0.116947	FALSE	7.3199	0.085774	NA	FALSE	360.667	-0.138063	0.817444	FALSE	92.6907	0.141058	0.999947	FALSE	2471	-0.0232919	0.999981	FALSE	10.5347	-0.086708	NA	FALSE	377.062	0.0289035	0.995382	FALSE
ENSG00000029534	ANK1	chr8:41510738-41754280	chr8:41751780-41756780	1754.84	-0.668231	0.0560349	FALSE	1049.58	-0.129236	0.530718	FALSE	877.472	-0.419468	0.812519	FALSE	4407.51	0.808121	0.0205029	FALSE	4162.17	-0.0600276	0.748334	FALSE	780.485	0.180144	0.709393	FALSE	12.989	-0.0812713	NA	FALSE	2421.81	0.0594267	0.999947	FALSE	4898.85	-0.300367	0.999981	FALSE	529.45	-0.581508	0.936576	FALSE	7.43504	0.0869459	NA	FALSE
ENSG00000029559	IBSP	chr4:88720732-88733074	chr4:88718232-88723232	100.043	4.85586	0.00235016	TRUE	13.1882	0.194335	0.929986	FALSE	34.5316	1.75275	0.0617921	FALSE	46.7623	0.384235	0.589003	FALSE	126.69	0.0300344	0.932484	FALSE	22.6536	-0.0484303	0.960049	FALSE	10.7652	0.466976	NA	FALSE	42.717	0.304853	0.999947	FALSE	245.985	0.0524939	0.999981	FALSE	18.7783	0.434612	NA	FALSE	8.50781	-0.0340334	NA	FALSE
ENSG00000029639	TFB1M	chr6:155578642-155635627	chr6:155633127-155638127	1432.49	0.917283	2.15026e-06	FALSE	1170.81	0.299986	0.183632	FALSE	849.633	0.265698	0.408295	FALSE	73.3597	0.454143	0.581222	FALSE	1952.51	0.4695	3.03438e-06	FALSE	6.40341	0.148772	NA	FALSE	299.234	0.139174	0.792845	FALSE	127.25	0.0856106	0.999947	FALSE	3796.6	0.055665	0.999981	FALSE	16.5166	0.0394777	NA	FALSE	407.163	0.0607581	0.987606	FALSE
ENSG00000029725	RABEP1	chr17:5185557-5289129	chr17:5183057-5188057	6873.25	-0.558566	0.000113305	FALSE	7445.8	-0.0344939	0.754936	FALSE	6995.83	-0.176064	0.329219	FALSE	124.462	0.487744	0.539052	FALSE	2927.25	0.059298	0.692555	FALSE	13.5718	0.170532	NA	FALSE	120.506	-0.547092	0.252863	FALSE	165.234	0.22343	0.999947	FALSE	4227.42	-0.064317	0.999981	FALSE	16.9017	-0.00783684	NA	FALSE	247.891	0.123349	0.986935	FALSE
ENSG00000029993	HMGB3	chrX:150148981-150159248	chrX:150146481-150151481	4602.11	-0.495428	0.307363	FALSE	4576.55	-0.125212	0.46641	FALSE	1611.96	0.751742	0.27229	FALSE	11.4094	0.376425	0.701855	FALSE	112.501	0.150141	0.636448	FALSE	9.39477	0.478191	NA	FALSE	18.0605	0.614274	0.326112	FALSE	17.0016	-0.126035	0.999947	FALSE	218.812	0.0543088	0.999981	FALSE	6.26743	0.37209	NA	FALSE	21.69	0.356675	0.927999	FALSE
ENSG00000030066	NUP160	chr11:47799638-47870107	chr11:47867607-47872607	4903.39	0.373888	0.031398	FALSE	3221.96	0.217855	0.0776719	FALSE	7266.74	-0.210152	0.780568	FALSE	75.2224	0.727671	0.363566	FALSE	2864.36	0.36025	0.000698295	FALSE	6.42713	0.228578	NA	FALSE	236.644	0.0130969	0.979518	FALSE	97.9377	0.0363573	0.999947	FALSE	3733.36	-0.24973	0.999981	FALSE	10.8166	-0.228546	NA	FALSE	270.572	0.1538	0.980889	FALSE
ENSG00000030110	BAK1	chr6:33540328-33548019	chr6:33545519-33550519	1705.96	-0.858493	0.000202867	FALSE	1990.65	0.195675	0.227029	FALSE	3049.08	0.0387165	0.964052	FALSE	8.77192	0.171888	0.87011	FALSE	247.372	0.0716805	0.790192	FALSE	8.39683	0.236208	NA	FALSE	149.546	-0.239087	0.576708	FALSE	10.0388	-0.169555	NA	FALSE	334.625	0.0173369	0.999981	FALSE	8.16168	-0.0312358	NA	FALSE	135.71	-0.0121045	0.999209	FALSE
ENSG00000030304	MUSK	chr9:113431050-113563859	chr9:113428550-113433550	39.427	0.978791	0.00351741	FALSE	32.0954	0.263236	0.592666	FALSE	105.576	0.957489	0.329099	FALSE	365.444	0.0255603	0.971781	FALSE	1579.89	0.346725	0.0260621	FALSE	13.8466	-0.0265377	NA	FALSE	37.6292	0.33632	0.56427	FALSE	361.004	0.149511	0.999947	FALSE	2893.92	0.267754	0.999981	FALSE	10.8069	0.163365	NA	FALSE	16.0179	0.147338	0.986935	FALSE
ENSG00000030419	IKZF2	chr2:213864428-214017151	chr2:214014651-214019651	779.687	-2.16793	1.95595e-07	TRUE	392.975	-0.139497	0.855007	FALSE	499.446	-1.01718	0.0307933	TRUE	714.329	1.90353	8.49062e-05	TRUE	1999.46	-0.782153	0.000127942	TRUE	14.584	2.08929	0.00222063	FALSE	210.587	-0.898634	0.0106679	FALSE	718.501	-0.253179	0.999947	FALSE	2866.64	-0.220161	0.999981	FALSE	46.4354	0.247223	0.999877	FALSE	262.364	-0.129657	0.986935	FALSE
ENSG00000030582	GRN	chr17:42422613-42430470	chr17:42420113-42425113	25763.3	0.728015	0.0987446	FALSE	17551.4	-0.766598	1.6937e-11	FALSE	39936.1	-0.134289	0.864599	FALSE	12.3849	0.226218	0.818846	FALSE	288.133	-0.0143572	0.958303	FALSE	19.8395	0.358773	0.659369	FALSE	138.03	-0.449688	0.24957	FALSE	17.0835	0.100217	0.999947	FALSE	454.923	-0.109014	0.999981	FALSE	13.2397	0.0383054	NA	FALSE	169.664	0.146519	0.986171	FALSE
ENSG00000031003	FAM13B	chr5:137273648-137387650	chr5:137385150-137390150	5812.97	-0.922458	2.27549e-06	FALSE	4863.09	0.077803	0.620998	FALSE	5294.98	-0.391646	0.176926	FALSE	222.735	0.510142	0.461288	FALSE	3196.1	0.225334	0.0443783	FALSE	71.8121	0.657319	0.197465	FALSE	15.3954	0.298372	NA	FALSE	219.575	0.0752603	0.999947	FALSE	5281.63	-0.0353788	0.999981	FALSE	23.5433	-0.111422	0.999877	FALSE	6.2694	-0.199097	NA	FALSE
ENSG00000031081	ARHGAP31	chr3:119013219-119139561	chr3:119010719-119015719	4562.9	-0.871459	0.0360618	FALSE	2432.87	-0.0565813	0.882082	FALSE	4715.54	-0.282699	0.493878	FALSE	186.973	0.484224	0.522504	FALSE	3899.29	-0.0570384	0.648583	FALSE	9.54273	0.991162	NA	FALSE	329.838	-1.12659	0.0026772	TRUE	220.616	0.0140093	0.999947	FALSE	4229.85	-0.249007	0.999981	FALSE	10.7593	0.022771	NA	FALSE	265.424	0.0983108	0.986935	FALSE
ENSG00000031544	NR2E3	chr15:72084976-72110600	chr15:72082476-72087476	10.206	0.417697	0.566906	FALSE	13.6114	-1.61381	0.00631329	FALSE	16.7533	0.188712	0.929502	FALSE	106.319	0.631826	0.328851	FALSE	217.768	-0.28279	0.254893	FALSE	3.8963	0.541008	NA	FALSE	289.083	-0.551407	0.285666	FALSE	73.5296	0.163458	0.999947	FALSE	374.203	-0.0358475	0.999981	FALSE	6.0264	-0.183772	NA	FALSE	168.026	0.252552	0.972714	FALSE
ENSG00000031691	CENPQ	chr6:49431090-49460820	chr6:49428590-49433590	864.161	-0.103626	0.870398	FALSE	1411.06	0.147968	0.593338	FALSE	1280.67	0.53474	0.0134642	FALSE	31.9375	0.410972	0.632838	FALSE	592.531	0.283947	0.141795	FALSE	8.00349	0.190499	NA	FALSE	194.781	-0.106787	0.849497	FALSE	44.6239	0.244	0.999947	FALSE	1063.03	0.2468	0.999981	FALSE	12.6972	-0.118412	NA	FALSE	225.623	0.0584175	0.988563	FALSE
ENSG00000031698	SARS	chr1:109756539-109780791	chr1:109754039-109759039	14684.1	-0.76102	0.00104592	FALSE	17930.1	0.268523	0.000576913	FALSE	11433.4	-0.454993	0.0331653	FALSE	31.9299	0.399793	0.660644	FALSE	978.623	0.0895193	0.600055	FALSE	11.9995	0.221631	NA	FALSE	298.454	-1.08726	0.00336772	TRUE	43.3355	0.0964306	0.999947	FALSE	1423.89	-0.195616	0.999981	FALSE	13.4816	-0.112356	NA	FALSE	273.436	-0.161018	0.978064	FALSE
ENSG00000031823	RANBP3	chr19:5916149-5978153	chr19:5975653-5980653	3205.02	-0.131692	0.73856	FALSE	1916.22	-0.0475052	0.824252	FALSE	4050.05	0.0174925	0.979637	FALSE	72.0257	0.495943	0.573768	FALSE	2526.96	0.101637	0.525358	FALSE	5.30242	0.378743	NA	FALSE	233.808	-0.201952	0.633757	FALSE	102.193	0.147468	0.999947	FALSE	3166.29	-0.0721435	0.999981	FALSE	10.1073	-0.0646649	NA	FALSE	344.735	0.18265	0.977023	FALSE
ENSG00000032219	ARID4A	chr14:58765102-58840605	chr14:58762602-58767602	1408.67	-0.204571	0.251058	FALSE	1085.16	0.0407338	0.788618	FALSE	1299.4	-0.362643	0.0689415	FALSE	96.326	0.52124	0.520657	FALSE	2448.44	0.132448	0.29853	FALSE	7.9727	0.321606	NA	FALSE	335.991	-0.362243	0.409047	FALSE	124.038	0.1849	0.999947	FALSE	4158.17	-0.0623089	0.999981	FALSE	14.7277	-0.176548	NA	FALSE	419.218	0.150894	0.978083	FALSE
ENSG00000032389	TSSC1	chr2:3192695-3381653	chr2:3379153-3384153	2063.99	-0.276713	0.39213	FALSE	2335.31	0.540394	6.03014e-09	FALSE	1712.15	0.250497	0.171353	FALSE	298.102	0.248394	0.6873	FALSE	3889.64	-0.159291	0.341067	FALSE	8.96905	0.617047	NA	FALSE	289.582	-0.111709	0.821266	FALSE	289.109	0.144343	0.999947	FALSE	3948.97	0.152924	0.999981	FALSE	16.1896	-0.0575306	NA	FALSE	396.547	0.269812	0.940989	FALSE
ENSG00000032444	PNPLA6	chr19:7598889-7626650	chr19:7596389-7601389	8603.38	0.167624	0.495207	FALSE	6872.41	-0.00777619	0.970438	FALSE	7378.23	-0.0698083	0.905506	FALSE	33.5904	0.616307	0.469789	FALSE	989.907	-0.00587044	0.978869	FALSE	6.19839	0.740083	NA	FALSE	285.799	-0.526231	0.110323	FALSE	44.8902	0.11679	0.999947	FALSE	1229.49	0.0480992	0.999981	FALSE	14.4887	0.0136707	NA	FALSE	308.729	0.280491	0.936343	FALSE
ENSG00000032742	IFT88	chr13:21140584-21265503	chr13:21138084-21143084	1531.83	0.833963	1.35535e-05	FALSE	901.319	0.158288	0.459868	FALSE	881.094	0.225446	0.74942	FALSE	246.95	-0.0266152	0.97394	FALSE	2879.47	0.364083	0.00730226	FALSE	18.821	0.223139	0.801517	FALSE	380.283	-0.0705939	0.899371	FALSE	276.684	-0.208353	0.999947	FALSE	3424.88	-0.116315	0.999981	FALSE	14.8367	-0.15134	NA	FALSE	413.293	-0.106412	0.986935	FALSE
ENSG00000033011	ALG1	chr16:5083702-5137380	chr16:5081202-5086202	3703.29	-0.152278	0.625852	FALSE	3410.82	0.131999	0.105503	FALSE	4309.19	0.0956652	0.784577	FALSE	1426.47	0.728543	0.184534	FALSE	531.057	-0.221597	0.366525	FALSE	20.696	0.396176	0.656021	FALSE	140.358	-0.588634	0.0984638	FALSE	499.219	0.0787502	0.999947	FALSE	890.201	-0.364719	0.999981	FALSE	14.822	-0.448215	NA	FALSE	204.51	0.213043	0.977023	FALSE
ENSG00000033030	ZCCHC8	chr12:122957416-122985518	chr12:122983018-122988018	1562.9	-0.30224	0.288669	FALSE	1203.61	0.0320124	0.880147	FALSE	1701.78	0.112828	0.645876	FALSE	39.0097	0.405062	0.633349	FALSE	1054.05	0.213777	0.127229	FALSE	4.99304	0.738006	NA	FALSE	304.356	-0.543763	0.172078	FALSE	45.7597	0.0470169	0.999947	FALSE	1659.99	-0.105736	0.999981	FALSE	11.9715	-0.267539	NA	FALSE	377.706	0.0471198	0.99047	FALSE
ENSG00000033050	ABCF2	chr7:150904922-150924316	chr7:150921816-150926816	6870.33	-0.0946155	0.686051	FALSE	5915.41	-0.227209	0.358419	FALSE	10110.3	0.457826	0.0286066	FALSE	73.2667	0.593356	0.352824	FALSE	735.562	0.0930316	0.55134	FALSE	12.1681	-0.00997599	NA	FALSE	163.451	-0.0812016	0.867891	FALSE	54.7908	-0.0387316	0.999947	FALSE	822.364	-0.327061	0.999981	FALSE	9.75779	-0.178882	NA	FALSE	126.507	-0.235289	0.977023	FALSE
ENSG00000033100	CHPF2	chr7:150929574-150935908	chr7:150927074-150932074	11980.2	-0.303749	0.303462	FALSE	6452.88	-0.372531	0.0368326	FALSE	8429.69	0.291024	0.239742	FALSE	8.41612	0.509625	0.606118	FALSE	309.622	0.213271	0.301147	FALSE	13.0405	0.155665	NA	FALSE	280.032	-0.426236	0.320729	FALSE	15.3235	-0.193009	0.999947	FALSE	382.96	-0.154884	0.999981	FALSE	15.0742	-0.166937	NA	FALSE	284.306	0.0293177	0.995551	FALSE
ENSG00000033122	LRRC7	chr1:70034080-70617628	chr1:70031580-70036580	202.225	-0.227149	0.741144	FALSE	231.149	0.007845	0.987643	FALSE	329.073	-1.73808	0.00074515	TRUE	2513.87	0.523716	0.215125	FALSE	5657.49	-0.0747555	0.650139	FALSE	126.591	1.12092	0.0136071	TRUE	19.1414	-0.502484	0.444654	FALSE	2427.72	-0.16022	0.999947	FALSE	11079.7	0.318951	0.999981	FALSE	159.645	-0.771187	0.700191	FALSE	19.8177	0.549045	0.637321	FALSE
ENSG00000033170	FUT8	chr14:65877309-66210839	chr14:65874809-65879809	3924.24	-0.661276	0.00113267	FALSE	3234.61	-0.175508	0.346496	FALSE	6409.3	-0.270768	0.757975	FALSE	679.821	0.638821	0.308114	FALSE	5255.05	0.0405915	0.80013	FALSE	18.0466	-0.251742	0.781632	FALSE	281.25	-0.322067	0.439217	FALSE	718.523	0.301427	0.999947	FALSE	8539	-0.099205	0.999981	FALSE	20.4551	-0.387177	NA	FALSE	485.572	0.105825	0.986935	FALSE
ENSG00000033178	UBA6	chr4:68478369-68566897	chr4:68564397-68569397	11907.8	0.0336369	0.824616	FALSE	10105.6	0.144995	0.0242606	FALSE	11939.6	0.212281	0.254159	FALSE	104.073	0.632003	0.40623	FALSE	3023.78	0.244264	0.0240165	FALSE	4.93593	0.576314	NA	FALSE	280.767	0.18798	0.706403	FALSE	159.637	0.303852	0.999947	FALSE	5381.05	0.0294961	0.999981	FALSE	14.8776	-0.187325	NA	FALSE	390.569	0.189964	0.977023	FALSE
ENSG00000033327	GAB2	chr11:77926342-78129394	chr11:78126894-78131894	1399.78	-0.209592	0.542339	FALSE	2448.42	0.14213	0.10257	FALSE	6849.07	-0.865933	0.0120776	FALSE	490.006	0.364673	0.534254	FALSE	3350.14	-0.0828996	0.567979	FALSE	4.7991	0.679113	NA	FALSE	452.562	-0.0749785	0.882002	FALSE	396.282	0.315966	0.999947	FALSE	6318.92	-0.0915615	0.999981	FALSE	14.5576	-0.235362	NA	FALSE	915.639	0.235628	0.954228	FALSE
ENSG00000033627	ATP6V0A1	chr17:40610861-40674629	chr17:40608361-40613361	696.971	2.92583	7.11999e-27	TRUE	862.039	-0.229858	0.327662	FALSE	2791.15	-0.19886	0.804384	FALSE	315.332	0.16355	0.757151	FALSE	970.505	0.572057	0.0135078	FALSE	13.7724	0.557384	NA	FALSE	98.7534	0.446721	0.403561	FALSE	200.635	0.0869248	0.999947	FALSE	2212.64	-0.15668	0.999981	FALSE	12.5574	0.179684	NA	FALSE	155.442	-0.114903	0.986935	FALSE
ENSG00000033800	PIAS1	chr15:68346516-68483096	chr15:68344016-68349016	1402.11	-0.296131	0.590938	FALSE	541.823	-0.126687	0.534759	FALSE	5514.98	-0.467926	0.202063	FALSE	206.304	0.634702	0.381623	FALSE	3284.73	0.0902455	0.561715	FALSE	14.6998	1.24611	0.0819221	FALSE	176.34	-0.820996	0.0242254	FALSE	243.127	0.376359	0.999947	FALSE	5848.11	-0.062847	0.999981	FALSE	12.6713	0.116978	NA	FALSE	268.321	0.0795578	0.986935	FALSE
ENSG00000033867	SLC4A7	chr3:27414213-27525911	chr3:27523411-27528411	14847.5	1.11039	1.29898e-06	TRUE	7223.58	-0.165388	0.391042	FALSE	6847	0.374315	0.23601	FALSE	158.109	0.799262	0.265826	FALSE	3924.59	0.411333	0.0115327	FALSE	7.23958	0.583058	NA	FALSE	377.519	0.179021	0.721521	FALSE	187.575	0.287352	0.999947	FALSE	6672.05	0.00203685	0.999981	FALSE	13.5447	-0.190625	NA	FALSE	573.419	0.402057	0.764736	FALSE
ENSG00000034053	APBA2	chr15:29129628-29410518	chr15:29127128-29132128	3204.59	0.206988	0.433369	FALSE	3365.73	-0.272644	0.0129021	FALSE	469.382	0.158642	0.956859	FALSE	666.641	-0.0978281	0.852343	FALSE	3814.34	-0.0542767	0.762766	FALSE	25.4049	0.119905	0.897137	FALSE	151.215	0.348873	0.454837	FALSE	606.356	0.205283	0.999947	FALSE	4662.88	-0.180242	0.999981	FALSE	18.3804	-0.234424	NA	FALSE	364.952	0.0665724	0.987535	FALSE
ENSG00000034063	UHRF1	chr19:4903091-4962165	chr19:4900591-4905591	3818.27	0.203838	0.699592	FALSE	4059.47	0.181221	0.248062	FALSE	4052.49	-0.0368841	0.968297	FALSE	89.6368	0.781254	0.267137	FALSE	1830.92	0.27491	0.0896363	FALSE	27.376	0.971906	0.112843	FALSE	13.2123	0.227774	NA	FALSE	92.9776	-0.185695	0.999947	FALSE	2316.94	0.113607	0.999981	FALSE	11.2247	0.0373487	NA	FALSE	8.86099	0.0667761	NA	FALSE
ENSG00000034152	MAP2K3	chr17:21187983-21218552	chr17:21185483-21190483	1744.86	-0.39093	0.0873057	FALSE	1641.3	0.13395	0.7896	FALSE	7562.28	0.32539	0.380778	FALSE	1144.33	0.233304	0.660078	FALSE	1408.92	0.0282523	0.90446	FALSE	6.0583	0.222292	NA	FALSE	459.502	-0.427507	0.310093	FALSE	566.865	-0.196638	0.999947	FALSE	1942.05	-0.0433758	0.999981	FALSE	14.4693	-0.28718	NA	FALSE	415.586	0.177929	0.977409	FALSE
ENSG00000034239	EFCAB1	chr8:49623347-49647870	chr8:49645370-49650370	9.03277	0.599941	0.564147	FALSE	9.88199	-0.850672	0.0950392	FALSE	46.0768	0.164706	0.929563	FALSE	505.631	0.301447	0.580637	FALSE	167.058	-0.184619	0.467863	FALSE	88.2647	-0.107892	0.866195	FALSE	40.8647	0.139319	0.837883	FALSE	226.965	-0.0873912	0.999947	FALSE	230.923	0.0782566	0.999981	FALSE	42.5061	-0.200588	0.999877	FALSE	32.1062	-0.23442	0.977023	FALSE
ENSG00000034510	TMSB10	chr2:85132748-85133795	chr2:85130248-85135248	76968.8	-0.0499005	0.937672	FALSE	74930.8	0.3233	0.0100738	FALSE	76785.2	-0.17151	0.420629	FALSE	2.78579	0.100135	NA	FALSE	24.8491	0.342021	NA	FALSE	13.8576	0.387434	NA	FALSE	458.897	-0.533289	0.110797	FALSE	8.05605	-0.39702	NA	FALSE	64.0066	-0.00795874	0.999981	FALSE	26.4518	-0.328685	0.999877	FALSE	614.308	0.300683	0.915989	FALSE
ENSG00000034533	ASTE1	chr3:130732718-130746493	chr3:130743993-130748993	854.068	-0.0391998	0.869673	FALSE	662.286	0.163234	0.207077	FALSE	1141.15	-0.160087	0.745634	FALSE	16.897	0.761863	0.416809	FALSE	436.43	0.343972	0.0538736	FALSE	6.76637	0.325761	NA	FALSE	308.324	0.101399	0.848064	FALSE	26.4814	0.128899	0.999947	FALSE	713.381	0.0322292	0.999981	FALSE	11.5955	0.00439076	NA	FALSE	294.013	-0.0102217	0.999209	FALSE
ENSG00000034677	RNF19A	chr8:101269287-101348446	chr8:101345946-101350946	5707.13	-0.989879	5.69062e-06	FALSE	5799.68	-0.183988	0.154547	FALSE	5256.75	-0.350373	0.319151	FALSE	338.577	1.30909	0.000570007	TRUE	1896.3	0.0756606	0.65537	FALSE	41.5453	1.55088	0.00160616	TRUE	52.0749	-0.947191	0.0718013	FALSE	221.277	-0.0171183	0.999947	FALSE	3535.12	-0.213631	0.999981	FALSE	20.3678	-0.0500308	NA	FALSE	84.1343	0.0619831	0.990135	FALSE
ENSG00000034693	PEX3	chr6:143771943-143811147	chr6:143769443-143774443	1138.47	-0.442803	0.0168641	FALSE	1160.96	0.083902	0.726901	FALSE	1229.22	0.106299	0.823801	FALSE	71.9429	0.501186	0.487214	FALSE	1016.63	0.0139138	0.94717	FALSE	8.61396	0.674158	NA	FALSE	147.696	0.0527326	0.92376	FALSE	80.1548	0.232811	0.999947	FALSE	1777.55	0.0437669	0.999981	FALSE	9.76384	-0.017872	NA	FALSE	155.146	0.0694132	0.987606	FALSE
ENSG00000034713	GABARAPL2	chr16:75600248-75611779	chr16:75597748-75602748	3270.45	-0.511197	0.0376945	FALSE	2694.85	-0.0999952	0.591011	FALSE	3749.33	-0.0532265	0.897531	FALSE	17.0872	0.222326	0.82227	FALSE	520.241	0.232387	0.137064	FALSE	30.4766	0.378092	0.684732	FALSE	214.245	-0.350956	0.431716	FALSE	20.0794	0.129173	0.999947	FALSE	727.69	-0.229368	0.999981	FALSE	14.2283	-0.246697	NA	FALSE	339.526	0.100437	0.986935	FALSE
ENSG00000034971	MYOC	chr1:171604556-171621823	chr1:171619323-171624323	7.61708	-0.425807	0.798707	FALSE	2.149	-3.36139	0.0594445	FALSE	3.17254	-0.125856	NA	FALSE	366.323	1.12722	0.00231702	TRUE	117.053	-0.592274	0.0291604	TRUE	75.9881	2.09116	0.000114128	TRUE	88.1132	-1.56096	8.02467e-05	TRUE	124.08	0.0488311	0.999947	FALSE	171.702	-0.106281	0.999981	FALSE	33.3762	0.379022	0.999877	FALSE	30.9544	-0.749822	0.265566	FALSE
ENSG00000035115	SH3YL1	chr2:217729-266398	chr2:263898-268898	998.543	-0.0139214	0.978897	FALSE	778.797	-0.555218	2.91631e-13	FALSE	563.918	0.260028	0.793962	FALSE	144.132	0.1588	0.804473	FALSE	1024.46	-0.0837986	0.626403	FALSE	10.2768	0.378783	NA	FALSE	180.584	-0.235854	0.600817	FALSE	182.994	0.102221	0.999947	FALSE	1020.82	-0.561592	0.523834	FALSE	17.4941	-0.133663	NA	FALSE	217.337	0.139246	0.986935	FALSE
ENSG00000035141	FAM136A	chr2:70523106-70529222	chr2:70526722-70531722	3108.21	-0.302742	0.214508	FALSE	2792.47	0.154937	0.000479423	FALSE	3240.74	0.166615	0.604475	FALSE	5.70563	0.802298	0.415774	FALSE	196.79	0.292273	0.179429	FALSE	15.4278	0.436077	0.598981	FALSE	139.556	0.0741508	0.879796	FALSE	11.1331	0.304918	0.999947	FALSE	306.383	-0.0417288	0.999981	FALSE	19.4021	-0.0424816	NA	FALSE	229.267	0.405163	0.824676	FALSE
ENSG00000035403	VCL	chr10:75757871-75879918	chr10:75755371-75760371	48566.2	-0.409816	0.221491	FALSE	22628.8	-0.452089	3.32e-17	FALSE	45360.3	-0.530729	0.000347742	FALSE	151.663	0.696604	0.406115	FALSE	4557.71	0.211018	0.0664799	FALSE	12.0796	0.397944	NA	FALSE	412.723	-0.0340919	0.953761	FALSE	234.433	0.179667	0.999947	FALSE	7491.58	-0.16745	0.999981	FALSE	16.3295	-0.171573	NA	FALSE	495.512	0.377414	0.81562	FALSE
ENSG00000035499	DEPDC1B	chr5:59892738-59996017	chr5:59993517-59998517	822.223	-0.619231	0.274625	FALSE	846.226	-0.230004	0.533106	FALSE	2029.77	-0.179413	0.865093	FALSE	136.393	0.495678	0.50511	FALSE	1847.76	-0.0376764	0.805576	FALSE	28.8773	0.542209	0.437655	FALSE	179.156	-0.203601	0.660871	FALSE	195.205	0.213491	0.999947	FALSE	2671.73	-0.209053	0.999981	FALSE	14.0649	0.253753	NA	FALSE	337.904	-0.0336061	0.994735	FALSE
ENSG00000035664	DAPK2	chr15:64199234-64364232	chr15:64361732-64366732	834.052	3.54818	9.1943e-11	TRUE	607.156	-0.488882	0.00823316	FALSE	213.362	0.0125373	0.994721	FALSE	1033.41	-0.933381	0.0319661	FALSE	2261.24	0.489571	0.00190267	FALSE	6.58568	0.850477	NA	FALSE	171.642	-0.257215	0.648677	FALSE	459.966	0.0915265	0.999947	FALSE	4059.49	-0.405882	0.999981	FALSE	7.16433	0.131469	NA	FALSE	137.93	-0.446619	0.790943	FALSE
ENSG00000035681	NSMAF	chr8:59496062-59572403	chr8:59569903-59574903	5473.43	0.345383	0.132416	FALSE	4292.1	-0.301616	0.0120624	FALSE	7476.79	-0.363422	0.0929137	FALSE	111.761	0.417629	0.602464	FALSE	2312.52	0.282237	0.0268512	FALSE	5.49369	1.17232	NA	FALSE	406.156	-0.521282	0.204795	FALSE	156.862	-0.0212527	0.999947	FALSE	3638.4	-0.227726	0.999981	FALSE	15.2283	-0.322123	NA	FALSE	742.235	-0.0955902	0.986935	FALSE
ENSG00000035687	ADSS	chr1:244571795-244615436	chr1:244612936-244617936	5428.54	-0.245159	0.386109	FALSE	4219.51	0.101457	0.714249	FALSE	5401.65	0.00250689	0.998192	FALSE	55.0292	0.578344	0.502124	FALSE	1521.39	0.388656	0.000572491	FALSE	9.65015	0.0141001	NA	FALSE	234.782	-0.392781	0.373623	FALSE	69.845	0.268735	0.999947	FALSE	2050.22	0.0204691	0.999981	FALSE	10.7839	-0.175336	NA	FALSE	286.402	0.279291	0.951685	FALSE
ENSG00000035720	STAP1	chr4:68424445-68473055	chr4:68421945-68426945	1.20801	2.58047	0.162318	FALSE	1.39568	2.96008	0.17534	FALSE	3.15309	0.388452	NA	FALSE	1549.94	-0.254963	0.600881	FALSE	211.73	-0.153467	0.610382	FALSE	130.094	-1.05392	0.0156012	TRUE	14.6195	0.726477	NA	FALSE	602.476	-0.224118	0.999947	FALSE	510.656	0.297189	0.999981	FALSE	49.8925	-0.382336	0.999877	FALSE	7.66332	0.0657152	NA	FALSE
ENSG00000035862	TIMP2	chr17:76849058-76921469	chr17:76918969-76923969	35214.7	0.440296	0.34202	FALSE	18924.5	-0.601109	5.48118e-09	FALSE	121121	-0.573833	0.0268295	FALSE	88.9286	0.617926	0.475998	FALSE	2499.83	0.225504	0.084127	FALSE	9.06008	0.48716	NA	FALSE	315.87	-0.613685	0.10188	FALSE	153.243	-0.226553	0.999947	FALSE	4545.56	-0.102072	0.999981	FALSE	17.3528	-0.426764	NA	FALSE	629.796	0.261006	0.951685	FALSE
ENSG00000035928	RFC1	chr4:39289075-39367995	chr4:39365495-39370495	5444.32	-0.299311	0.219324	FALSE	4866.9	-0.0135903	0.900086	FALSE	7131.33	-0.221939	0.530203	FALSE	103.996	0.660853	0.353594	FALSE	2354.04	0.180488	0.12135	FALSE	23.4171	0.785348	0.232647	FALSE	143.889	-0.189545	0.701929	FALSE	142.703	0.263285	0.999947	FALSE	3800.34	-0.0761685	0.999981	FALSE	20.1862	-0.0549734	NA	FALSE	218.244	0.222693	0.977023	FALSE
ENSG00000036054	TBC1D23	chr3:99979843-100044095	chr3:99977343-99982343	9091.25	1.07183	0.000662708	TRUE	8527.03	-0.341801	0.00024689	FALSE	5208.76	-0.113336	0.817438	FALSE	85.8296	0.619154	0.470997	FALSE	1974.02	0.278064	0.059872	FALSE	7.66555	0.780242	NA	FALSE	254.883	0.105595	0.864433	FALSE	138.827	0.234308	0.999947	FALSE	4095.83	-0.0689868	0.999981	FALSE	11.3622	-0.29123	NA	FALSE	296.761	-0.198303	0.977023	FALSE
ENSG00000036257	CUL3	chr2:225334866-225450110	chr2:225447610-225452610	6445.28	-0.138247	0.591739	FALSE	4368.33	0.0671865	0.600768	FALSE	8625.56	-0.0260589	0.965724	FALSE	161.386	0.597038	0.444704	FALSE	3214.12	0.300215	0.0175746	FALSE	13.9607	0.0701441	NA	FALSE	314.079	-0.459128	0.387589	FALSE	238.015	0.208715	0.999947	FALSE	5983.71	0.0420343	0.999981	FALSE	21.8993	-0.425597	NA	FALSE	682.009	0.218738	0.966196	FALSE
ENSG00000036448	MYOM2	chr8:1993154-2113475	chr8:1990654-1995654	50.7125	0.0294584	0.961501	FALSE	8.03783	1.22242	0.424357	FALSE	121.826	-0.564081	0.310771	FALSE	11997	0.502829	0.329601	FALSE	352.349	-0.671364	0.00416132	TRUE	379.384	1.34148	0.000194057	TRUE	23.4434	-0.128996	0.870168	FALSE	5108.51	-0.391539	0.999947	FALSE	658.169	0.0481475	0.999981	FALSE	320.843	-0.46038	0.999877	FALSE	7.46749	0.0736215	NA	FALSE
ENSG00000036473	OTC	chrX:38211797-38280703	chrX:38209297-38214297	0.286898	1.74617	NA	FALSE	0.140196	-0.706327	NA	FALSE	0	NA	NA	FALSE	2459.84	-0.0808027	0.870698	FALSE	63.1563	0.0307385	0.940303	FALSE	141.589	-0.0539306	0.928444	FALSE	4.18823	0.0622295	NA	FALSE	445.522	-0.111798	0.999947	FALSE	140.065	-0.0234683	0.999981	FALSE	45.401	0.284287	0.999877	FALSE	4.05334	-0.0174295	NA	FALSE
ENSG00000036530	CYP46A1	chr14:100150640-100193638	chr14:100148140-100153140	37.6761	-0.00385939	0.995482	FALSE	14.2062	0.928956	0.103592	FALSE	23.887	-0.286122	0.887928	FALSE	2036.21	0.298856	0.567998	FALSE	190.826	-0.581465	0.0141266	FALSE	113.924	0.780477	0.113773	FALSE	200.182	0.0716419	0.879796	FALSE	1034.74	0.0339477	0.999947	FALSE	229.8	0.260005	0.999981	FALSE	70.5654	-0.0664684	0.999877	FALSE	210.954	0.453082	0.726822	FALSE
ENSG00000036549	ZZZ3	chr1:78028100-78149104	chr1:78146604-78151604	6087.43	-0.101423	0.479169	FALSE	6029.74	-0.0209595	0.909325	FALSE	6081.06	-0.157446	0.574638	FALSE	166.364	0.584773	0.484564	FALSE	3650.77	0.317389	0.0046638	FALSE	5.01129	0.833552	NA	FALSE	382.793	-0.380001	0.338721	FALSE	250.059	0.237446	0.999947	FALSE	6608.15	-0.051094	0.999981	FALSE	16.3006	-0.388859	NA	FALSE	540.467	0.176943	0.977023	FALSE
ENSG00000036565	SLC18A1	chr8:20002365-20040717	chr8:20038217-20043217	0.392571	0.783267	NA	FALSE	0.396259	-2.00638	NA	FALSE	0.249909	-1.61668	NA	FALSE	2719.43	0.539006	0.205541	FALSE	78.5502	-0.361291	0.262988	FALSE	300.947	0.462288	0.295413	FALSE	13.6372	0.113437	NA	FALSE	830.654	0.143705	0.999947	FALSE	323.272	-0.420637	0.999981	FALSE	97.5768	-0.12336	0.999877	FALSE	7.58579	0.171065	NA	FALSE
ENSG00000036672	USP2	chr11:119225924-119252436	chr11:119249936-119254936	41.8677	-0.826309	0.280185	FALSE	32.8369	-0.353599	0.472052	FALSE	266.46	-0.966587	0.257705	FALSE	143.762	1.19348	0.00862207	TRUE	308.31	-0.630443	0.00630575	TRUE	83.2897	0.504628	0.348779	FALSE	153.911	0.198845	0.724585	FALSE	91.3102	-0.0644722	0.999947	FALSE	592.654	0.127804	0.999981	FALSE	44.8296	0.239324	0.999877	FALSE	100.915	0.0242191	0.996297	FALSE
ENSG00000036828	CASR	chr3:121902529-122005342	chr3:121900029-121905029	0.67473	0.274064	NA	FALSE	0.762128	1.96026	NA	FALSE	2.50287	-0.067135	NA	FALSE	6468.58	-0.0663551	0.89188	FALSE	193.316	-0.38258	0.144735	FALSE	579.529	-0.085653	0.864751	FALSE	10.6126	-0.0787594	NA	FALSE	2144.39	-0.0796175	0.999947	FALSE	515.135	-0.289005	0.999981	FALSE	284.117	-0.387669	0.999877	FALSE	7.80022	0.127999	NA	FALSE
ENSG00000037042	TUBG2	chr17:40811322-40819024	chr17:40808822-40813822	1485.66	0.247145	0.51144	FALSE	694.964	-0.0914267	0.697486	FALSE	1349.44	0.182478	0.617751	FALSE	8.9064	0.00225237	0.998536	FALSE	253.577	0.361985	0.0660654	FALSE	9.29435	0.397683	NA	FALSE	166.379	-0.395032	0.333154	FALSE	11.2788	0.0279862	0.999947	FALSE	351.343	-0.113083	0.999981	FALSE	10.6693	-0.167364	NA	FALSE	199.451	0.0798454	0.986935	FALSE
ENSG00000037241	RPL26L1	chr5:172385731-172396774	chr5:172383231-172388231	1583.05	-0.101584	0.797283	FALSE	1655.45	0.610499	0.000521593	FALSE	2136.04	0.0857617	0.882671	FALSE	10.8365	-0.0223748	0.983882	FALSE	310.844	0.250899	0.164026	FALSE	6.42471	-0.132851	NA	FALSE	270.257	0.040011	0.941489	FALSE	20.7679	0.0438922	0.999947	FALSE	389.463	-0.108143	0.999981	FALSE	15.2576	-0.038406	NA	FALSE	170.311	-0.450599	0.785158	FALSE
ENSG00000037280	FLT4	chr5:180028505-180076624	chr5:180074124-180079124	7.75368	0.86194	0.496399	FALSE	9.16356	-0.584564	0.58708	FALSE	4.8913	-0.225674	NA	FALSE	2319.21	0.253848	0.588874	FALSE	145.757	-0.627529	0.012999	TRUE	571.391	0.0798516	0.881134	FALSE	12.3148	-0.281187	NA	FALSE	1689.4	-0.416957	0.999947	FALSE	247.705	0.0507526	0.999981	FALSE	397.451	-0.399471	0.999877	FALSE	7.42613	0.209444	NA	FALSE
ENSG00000037474	NSUN2	chr5:6599351-6633404	chr5:6630904-6635904	8463.22	0.00640261	0.984415	FALSE	6592.99	0.22542	0.00509415	FALSE	7168.81	0.180903	0.584087	FALSE	48.6888	0.552553	0.520875	FALSE	1635.84	0.260918	0.0418139	FALSE	8.76195	0.237348	NA	FALSE	375.305	-0.10239	0.82391	FALSE	70.8193	0.00341834	0.999947	FALSE	2342.04	-0.141302	0.999981	FALSE	17.9813	-0.392461	NA	FALSE	562.176	0.160244	0.977409	FALSE
ENSG00000037637	FBXO42	chr1:16573333-16678949	chr1:16676449-16681449	2282.33	-0.670759	0.0294735	FALSE	1617.42	-0.148074	0.102974	FALSE	3747.85	-0.23342	0.360819	FALSE	131.734	0.644892	0.41003	FALSE	2720.53	0.017642	0.907745	FALSE	8.05707	0.582722	NA	FALSE	375.515	-0.901917	0.0245826	FALSE	155.552	0.143146	0.999947	FALSE	3933.06	-0.179508	0.999981	FALSE	14.3513	-0.107477	NA	FALSE	392.906	0.246424	0.958525	FALSE
ENSG00000037749	MFAP3	chr5:153418465-153600038	chr5:153415965-153420965	8607.73	-0.512501	0.0691683	FALSE	4618.01	0.252972	0.062118	FALSE	8587.84	-0.248387	0.62026	FALSE	2945.6	0.657709	0.0956856	FALSE	2556.48	-0.167946	0.121179	FALSE	9.56124	0.423609	NA	FALSE	149.906	-0.204101	0.696376	FALSE	1462.09	0.0274443	0.999947	FALSE	3751.06	-0.138297	0.999981	FALSE	12.7533	0.151599	NA	FALSE	158.323	-0.0624962	0.988563	FALSE
ENSG00000037757	MRI1	chr19:13875345-13885096	chr19:13872845-13877845	2346.96	0.385694	0.0498535	FALSE	1787.62	-0.0208784	0.931767	FALSE	2104.98	0.0718823	0.860864	FALSE	15.9225	0.406574	0.656806	FALSE	302.813	0.161991	0.437475	FALSE	10.9586	0.903606	NA	FALSE	131.141	-0.101852	0.840409	FALSE	15.513	0.125446	0.999947	FALSE	416.544	-0.00113341	0.999981	FALSE	13.1469	0.119828	NA	FALSE	177.576	0.493179	0.686455	FALSE
ENSG00000037897	METTL1	chr12:58162253-58166576	chr12:58164076-58169076	786.404	0.20982	0.494317	FALSE	792.473	0.07256	0.492989	FALSE	1698.16	0.448203	0.0269221	FALSE	4.67197	0.17034	NA	FALSE	132.113	0.12736	0.652335	FALSE	5.82341	0.358405	NA	FALSE	327.572	-0.1736	0.703969	FALSE	11.3893	-0.232518	0.999947	FALSE	186.772	-0.18674	0.999981	FALSE	15.5576	-0.312888	NA	FALSE	420.657	0.111251	0.986935	FALSE
ENSG00000037965	HOXC8	chr12:54402831-54407570	chr12:54400331-54405331	60.6667	0.553021	0.171553	FALSE	49.3474	-0.761499	0.120438	FALSE	250.688	0.903434	0.00415817	FALSE	7.27524	0.418736	0.669146	FALSE	146.781	0.195268	0.457465	FALSE	8.91097	0.289332	NA	FALSE	39.5324	-0.104493	0.880942	FALSE	17.6536	0.238582	0.999947	FALSE	212.411	-0.0563541	0.999981	FALSE	25.79	0.58671	0.948609	FALSE	105.651	-0.441667	0.805872	FALSE
ENSG00000038002	AGA	chr4:178351923-178363657	chr4:178361157-178366157	2477.93	-0.0918784	0.762983	FALSE	1655.17	0.122348	0.656486	FALSE	2149.91	-0.27264	0.595974	FALSE	17.7203	0.50203	0.580637	FALSE	328.167	0.0882283	0.713077	FALSE	5.85085	0.452239	NA	FALSE	253.069	-0.212553	0.724507	FALSE	26.1975	0.202917	0.999947	FALSE	503.211	-0.0567137	0.999981	FALSE	15.3322	-0.0636392	NA	FALSE	367.331	0.0466732	0.99047	FALSE
ENSG00000038210	PI4K2B	chr4:25162262-25280714	chr4:25159762-25164762	2998.34	-0.57029	0.0375189	FALSE	3120.19	-0.106136	0.646776	FALSE	2890.52	-0.0647212	0.928884	FALSE	846.881	0.0448549	0.95679	FALSE	1718.95	0.139269	0.331621	FALSE	7.03951	0.287572	NA	FALSE	239.278	-0.558568	0.214234	FALSE	516.451	0.175095	0.999947	FALSE	2722.66	-0.0710519	0.999981	FALSE	11.6796	-0.25471	NA	FALSE	302.6	0.105253	0.986935	FALSE
ENSG00000038219	BOD1L1	chr4:13570361-13629347	chr4:13626847-13631847	9880.86	0.439867	0.102137	FALSE	5796.32	0.110048	0.57596	FALSE	11583.8	-0.368018	0.0359538	FALSE	81.6363	0.52673	0.515746	FALSE	2512.53	0.277834	0.0108712	FALSE	8.27281	-0.0842492	NA	FALSE	339.278	-0.278775	0.553296	FALSE	102.485	0.179965	0.999947	FALSE	3636.37	-0.0814409	0.999981	FALSE	13.1574	-0.461383	NA	FALSE	443.71	0.116555	0.986935	FALSE
ENSG00000038274	MAT2B	chr5:162930119-162946342	chr5:162927619-162932619	4362	0.12985	0.664688	FALSE	4265.21	-0.0439086	0.691538	FALSE	4302.48	0.174459	0.685774	FALSE	20.9817	0.841859	0.33849	FALSE	454.089	0.293839	0.0783143	FALSE	4.98698	0.861968	NA	FALSE	261.603	-0.844027	0.0297604	FALSE	34.1264	-0.211692	0.999947	FALSE	907.172	-0.108301	0.999981	FALSE	10.3437	-0.178137	NA	FALSE	272.591	-0.141248	0.985067	FALSE
ENSG00000038295	TLL1	chr4:166794409-167025047	chr4:166791909-166796909	700.389	-0.77993	0.210783	FALSE	1960.04	1.42043	0.153801	FALSE	8539.27	-0.9835	0.0341383	FALSE	619.112	0.20054	0.750706	FALSE	2374.8	0.158678	0.491783	FALSE	22.2342	-0.0289506	0.979127	FALSE	91.416	0.0509512	0.946988	FALSE	1096.21	0.23326	0.999947	FALSE	6546.48	0.27154	0.999981	FALSE	51.0167	0.417256	0.999877	FALSE	248.727	0.189823	0.977023	FALSE
ENSG00000038358	EDC4	chr16:67906925-67918406	chr16:67904425-67909425	6732.2	0.13325	0.581268	FALSE	4642.42	0.255889	0.0103249	FALSE	6685.93	-0.112313	0.881779	FALSE	13.2147	0.284038	0.769931	FALSE	583.919	0.157938	0.40955	FALSE	9.60538	0.407672	NA	FALSE	206.057	-0.0437236	0.936472	FALSE	17.6055	0.0389433	0.999947	FALSE	717.573	-0.073009	0.999981	FALSE	9.94643	-0.0950028	NA	FALSE	250.969	0.139612	0.986448	FALSE
ENSG00000038382	TRIO	chr5:14143810-14532235	chr5:14141310-14146310	30613.9	0.261076	0.182898	FALSE	35913.8	-0.00911063	0.984703	FALSE	49153.1	-0.545417	0.0508546	FALSE	919.749	0.851269	0.115648	FALSE	14750.5	0.326807	0.00544152	FALSE	8.05844	0.478042	NA	FALSE	758.074	-0.476073	0.327178	FALSE	1076.6	0.129042	0.999947	FALSE	26964.6	-0.246136	0.999981	FALSE	27.3743	-0.505409	0.999877	FALSE	1617.05	-0.0861598	0.986935	FALSE
ENSG00000038427	VCAN	chr5:82767283-82878122	chr5:82764783-82769783	177.422	-0.983707	0.0536441	FALSE	127.77	-2.73587	5.49089e-09	TRUE	203.786	-1.16794	0.0404379	TRUE	600.48	0.154001	0.775175	FALSE	1327.5	0.092505	0.569093	FALSE	98.6005	0.216502	0.730426	FALSE	103.66	-0.485893	0.352221	FALSE	862.78	0.276531	0.999947	FALSE	2133.45	-0.0628572	0.999981	FALSE	127.213	0.158079	0.999877	FALSE	47.8582	-0.164295	0.986171	FALSE
ENSG00000038532	CLEC16A	chr16:11038344-11276046	chr16:11035844-11040844	2260.53	-0.0133003	0.9763	FALSE	1340.64	0.111982	0.357275	FALSE	5665.66	-0.494828	0.203998	FALSE	379.523	0.24099	0.752528	FALSE	7036.97	0.0167083	0.918852	FALSE	8.7186	0.199642	NA	FALSE	197.469	-0.131551	0.766796	FALSE	417.544	-0.0054742	0.999947	FALSE	9428.56	-0.129904	0.999981	FALSE	14.3994	-0.225191	NA	FALSE	271.105	0.205254	0.977023	FALSE
ENSG00000038945	MSR1	chr8:15965386-16424999	chr8:16422499-16427499	143.998	1.02635	0.0158844	TRUE	374.287	2.09465	4.41372e-05	TRUE	368.177	-1.34448	0.0190137	TRUE	1531.55	-0.126791	0.839756	FALSE	5175.69	0.146861	0.511079	FALSE	10.1582	0.113029	NA	FALSE	135.131	0.280399	0.686887	FALSE	1396.54	-0.178477	0.999947	FALSE	9112	0.428747	0.999981	FALSE	15.9395	-0.170023	NA	FALSE	243.691	0.141716	0.986171	FALSE
ENSG00000039068	CDH1	chr16:68771127-68869451	chr16:68768627-68773627	42.9302	-3.87719	0.0105776	FALSE	64.0366	-0.955728	0.16563	FALSE	68.2843	-1.48273	0.176004	FALSE	956.247	1.57107	8.52126e-05	TRUE	820.235	-0.602703	0.00182171	TRUE	109.749	1.06509	0.0193631	TRUE	18.3524	0.174519	0.822943	FALSE	431.54	0.194935	0.999947	FALSE	1625.58	-0.0485613	0.999981	FALSE	126.707	-0.0879365	0.999877	FALSE	8.85684	0.111621	NA	FALSE
ENSG00000039123	SKIV2L2	chr5:54603587-54721409	chr5:54601087-54606087	7705.52	-0.0033551	0.989205	FALSE	6856.12	0.247972	2.78374e-07	FALSE	8098.43	-0.169487	0.583183	FALSE	156.735	0.425629	0.582623	FALSE	3890.22	0.18779	0.156802	FALSE	4.55652	0.5582	NA	FALSE	326.882	-0.28839	0.58734	FALSE	217.183	0.179087	0.999947	FALSE	6248.67	-0.0544848	0.999981	FALSE	10.6677	-0.111717	NA	FALSE	341.452	-0.0560956	0.988563	FALSE
ENSG00000039139	DNAH5	chr5:13690439-13944652	chr5:13942152-13947152	844.208	0.249158	0.677512	FALSE	1690.17	-1.02923	0.00131294	TRUE	1033.91	-1.25987	1.30051e-05	TRUE	5669.69	-0.0126704	0.984526	FALSE	2163.75	-0.142341	0.452989	FALSE	108.493	-0.250184	0.685163	FALSE	23.1594	0.659776	0.28051	FALSE	3371.23	0.3203	0.999947	FALSE	3562.64	-0.256525	0.999981	FALSE	98.5815	0.287857	0.999877	FALSE	8.26784	0.0467051	NA	FALSE
ENSG00000039319	ZFYVE16	chr5:79703831-79775169	chr5:79701331-79706331	6518.17	-0.292706	0.190664	FALSE	5349.8	0.0259117	0.893507	FALSE	5172.78	-0.191617	0.572845	FALSE	94.7023	0.376005	0.621043	FALSE	1788.54	0.141365	0.296412	FALSE	9.38548	0.152968	NA	FALSE	357.917	-0.37999	0.383055	FALSE	133.131	0.0989264	0.999947	FALSE	3015.75	-0.0289423	0.999981	FALSE	14.2183	0.0603389	NA	FALSE	514.403	0.0559395	0.987606	FALSE
ENSG00000039523	FAM65A	chr16:67552320-67580691	chr16:67549820-67554820	1489.95	-0.165994	0.615321	FALSE	1232.14	-0.137917	0.617212	FALSE	23723.3	-0.121173	0.822989	FALSE	52.8739	0.748133	0.376061	FALSE	861.449	0.130265	0.41437	FALSE	12.4257	-0.180446	NA	FALSE	109.904	0.179104	0.751425	FALSE	63.788	-0.315228	0.999947	FALSE	1351	-0.104136	0.999981	FALSE	12.7908	0.0124464	NA	FALSE	94.9037	-0.387397	0.889775	FALSE
ENSG00000039537	C6	chr5:41142335-41261540	chr5:41259040-41264040	2.89838	2.34318	0.143877	FALSE	26.1882	2.88017	0.00061704	FALSE	8.7225	-0.27223	0.927125	FALSE	3795.41	-0.302839	0.622895	FALSE	342.978	0.157493	0.585034	FALSE	306.967	-1.14166	0.0127443	TRUE	13.8943	0.702563	NA	FALSE	888.004	-0.0528551	0.999947	FALSE	1540.48	0.328882	0.999981	FALSE	58.0041	-0.378143	0.999877	FALSE	14.9096	0.524608	0.543065	FALSE
ENSG00000039560	RAI14	chr5:34656341-34832732	chr5:34653841-34658841	13983.5	-1.36637	4.17454e-06	TRUE	9694.69	-0.342545	0.101574	FALSE	17214.1	0.16043	0.825714	FALSE	224.514	0.618891	0.425799	FALSE	4842.5	-0.0503915	0.704452	FALSE	19.8245	1.60435	0.0235846	FALSE	513.364	-0.677637	0.0972244	FALSE	289.362	0.156313	0.999947	FALSE	8146.75	-0.362284	0.999981	FALSE	17.5222	-0.436706	NA	FALSE	640.827	-0.197054	0.976279	FALSE
ENSG00000039600	SOX30	chr5:157052686-157098488	chr5:157095988-157100988	2.78706	0.459723	0.730518	FALSE	4.03459	0.610175	0.675103	FALSE	14.9988	0.313211	0.854635	FALSE	354.839	-0.169013	0.796193	FALSE	326.815	-0.0611621	0.775258	FALSE	35.0617	1.05629	0.0686868	FALSE	75.5836	-0.355793	0.508902	FALSE	329.435	0.0131743	0.999947	FALSE	531.4	0.162282	0.999981	FALSE	46.2695	0.119838	0.999877	FALSE	63.7508	-0.0975375	0.986935	FALSE
ENSG00000039650	PNKP	chr19:50364460-50371166	chr19:50368666-50373666	3033.98	0.418162	0.070251	FALSE	2970.71	0.0435484	0.845097	FALSE	2091.3	0.0615101	0.874699	FALSE	10.6665	0.208931	0.840239	FALSE	311.876	0.202701	0.32529	FALSE	8.08684	0.464605	NA	FALSE	527.296	-0.396528	0.322538	FALSE	17.1788	-0.354331	0.999947	FALSE	442.207	0.111391	0.999981	FALSE	16.0864	-0.258273	NA	FALSE	595.459	0.188543	0.977023	FALSE
ENSG00000039987	BEST2	chr19:12862515-12869272	chr19:12860015-12865015	4.43901	1.24906	0.224425	FALSE	7.82532	-0.0960548	0.940869	FALSE	5.32105	-0.424171	0.886277	FALSE	271.516	0.274293	0.605657	FALSE	27.2663	-0.179561	0.617935	FALSE	271.407	0.39037	0.387447	FALSE	35.1928	-0.150639	0.840212	FALSE	122.102	0.00837402	0.999947	FALSE	64.0024	-0.0558783	0.999981	FALSE	100.125	-0.286154	0.999877	FALSE	22.105	0.280756	0.966196	FALSE
ENSG00000040199	PHLPP2	chr16:71671737-71758604	chr16:71756104-71761104	3242.91	-0.457804	0.00304202	FALSE	2893.65	-0.0245773	0.954552	FALSE	4012.24	-0.253279	0.358973	FALSE	112.022	0.575853	0.473763	FALSE	2837.57	0.108907	0.345367	FALSE	21.8209	1.17338	0.0697141	FALSE	184.918	-0.689236	0.0533462	FALSE	133.224	0.01265	0.999947	FALSE	3844.17	-0.0889101	0.999981	FALSE	21.2242	-0.0774785	NA	FALSE	315.865	0.228231	0.970996	FALSE
ENSG00000040275	SPDL1	chr5:169010637-169031782	chr5:169008137-169013137	3431.64	-0.544192	0.20653	FALSE	3425.69	0.702247	0.00716255	FALSE	4755.84	-0.147353	0.555079	FALSE	26.602	0.747996	0.379486	FALSE	897.888	0.412488	0.00401726	FALSE	9.91849	0.259456	NA	FALSE	159.709	-0.127794	0.836037	FALSE	43.3788	0.41763	0.999947	FALSE	1414.07	0.0829597	0.999981	FALSE	12.7005	0.257462	NA	FALSE	198.851	0.379243	0.86397	FALSE
ENSG00000040341	STAU2	chr8:74332603-74659943	chr8:74657443-74662443	3685.17	-0.805049	6.31093e-09	FALSE	2896.12	0.233691	0.0945936	FALSE	4651.03	-0.579973	4.96216e-06	FALSE	732.726	0.561756	0.382038	FALSE	5793.61	-0.121219	0.291667	FALSE	27.2376	0.902543	0.145096	FALSE	167.274	-0.461319	0.279159	FALSE	711.887	0.156018	0.999947	FALSE	9995.26	-0.0679289	0.999981	FALSE	17.4621	-0.0457179	NA	FALSE	251.402	0.401799	0.830199	FALSE
ENSG00000040487	PQLC2	chr1:19638819-19655794	chr1:19636319-19641319	1405.16	-0.029612	0.933093	FALSE	1755.86	-0.418259	0.0102104	FALSE	2827.38	0.0818673	0.921664	FALSE	17.0702	0.425884	0.65006	FALSE	684.215	0.0970824	0.617966	FALSE	8.13106	0.856333	NA	FALSE	307.652	0.0254304	0.963121	FALSE	29.0657	-0.191177	0.999947	FALSE	973.679	-0.143189	0.999981	FALSE	12.7689	-0.197112	NA	FALSE	470.307	0.240897	0.961198	FALSE
ENSG00000040531	CTNS	chr17:3539761-3564836	chr17:3537261-3542261	2010.37	0.0818688	0.818682	FALSE	1799.06	-0.197011	0.042103	FALSE	3722.95	0.159522	0.771013	FALSE	29.984	0.629657	0.486754	FALSE	697.745	0.165185	0.309681	FALSE	5.88123	0.319149	NA	FALSE	256.758	-0.249466	0.52403	FALSE	39.2981	-0.213332	0.999947	FALSE	1317.31	-0.0467053	0.999981	FALSE	10.7212	-0.152667	NA	FALSE	395.618	0.140006	0.983306	FALSE
ENSG00000040608	RTN4R	chr22:20228937-20270769	chr22:20268269-20273269	314.769	-1.13762	0.0253404	TRUE	180.804	0.163898	0.829278	FALSE	503.575	-0.291326	0.684878	FALSE	291.93	1.37091	0.000275918	TRUE	335.632	-0.751284	0.00604376	TRUE	97.6894	0.502418	0.313831	FALSE	16.6589	0.0903422	NA	FALSE	185.408	-0.193736	0.999947	FALSE	376.869	0.0999396	0.999981	FALSE	43.16	-0.167731	0.999877	FALSE	5.9032	0.229868	NA	FALSE
ENSG00000040633	PHF23	chr17:7138346-7143041	chr17:7140541-7145541	5016.79	0.30386	0.311861	FALSE	3494.85	-0.0175167	0.970245	FALSE	5543.68	-0.0178461	0.988943	FALSE	7.20843	0.708156	0.474912	FALSE	171.435	0.471114	0.0393664	FALSE	6.51195	0.888149	NA	FALSE	568.054	-0.722122	0.00872015	FALSE	16.3694	-0.230117	0.999947	FALSE	304.876	0.0242378	0.999981	FALSE	15.5228	-0.398166	NA	FALSE	729.417	-0.0452626	0.990475	FALSE
ENSG00000040731	CDH10	chr5:24487208-24645087	chr5:24642587-24647587	73.1295	3.32384	1.25256e-08	TRUE	678.579	-0.0874419	0.751542	FALSE	3065.57	0.166363	0.94933	FALSE	11975.3	-0.124624	0.80187	FALSE	183.73	0.979937	0.000828937	TRUE	331.261	-0.779267	0.0305058	FALSE	21.9912	0.443362	0.520813	FALSE	1934.85	0.227339	0.999947	FALSE	4050.68	0.309878	0.999981	FALSE	23.1446	0.0699949	NA	FALSE	82.2768	-0.132251	0.986935	FALSE
ENSG00000040933	INPP4A	chr2:99061316-99210853	chr2:99058816-99063816	2858.86	-0.421246	0.0795692	FALSE	3226.49	0.131201	0.373859	FALSE	2793.61	-0.358126	0.153043	FALSE	274.436	0.324074	0.596145	FALSE	3652.68	-0.142842	0.2502	FALSE	33.3635	0.811645	0.173798	FALSE	153.568	-0.347135	0.499688	FALSE	299.706	0.0197331	0.999947	FALSE	5002.25	-0.160983	0.999981	FALSE	20.2096	-0.141224	NA	FALSE	339.265	0.22062	0.973886	FALSE
ENSG00000041353	RAB27B	chr18:52385090-52562747	chr18:52382590-52387590	3155.31	2.98646	2.90327e-07	TRUE	1771.88	-1.97036	2.71478e-21	TRUE	4537.27	0.297297	0.59725	FALSE	897.498	-0.865959	0.0535847	FALSE	2360.92	0.853055	1.69036e-07	TRUE	17.3538	-0.680011	0.383003	FALSE	41.9765	1.48025	0.00117701	TRUE	666.08	0.366575	0.999947	FALSE	4132.74	0.000557303	0.999981	FALSE	16.4381	0.0823406	NA	FALSE	15.1087	0.148862	0.986935	FALSE
ENSG00000041357	PSMA4	chr15:78832746-78841604	chr15:78830246-78835246	8557.41	-0.437832	0.0555568	FALSE	9043.8	0.158466	0.347401	FALSE	7851.21	0.119137	0.757064	FALSE	13.7338	0.507572	0.597438	FALSE	353.143	0.34164	0.0506302	FALSE	12.1304	0.597097	NA	FALSE	288.607	-0.312755	0.513941	FALSE	16.1912	-0.0782696	0.999947	FALSE	583.596	-0.178799	0.999981	FALSE	15.4187	-0.14483	NA	FALSE	358.792	0.0380224	0.994079	FALSE
ENSG00000041515	MYO16	chr13:109248499-109860355	chr13:109245999-109250999	73.5367	-1.68956	0.00014019	TRUE	164.706	-0.0695005	0.95714	FALSE	366.161	0.939415	0.301665	FALSE	28210	0.321694	0.500543	FALSE	2769.5	-0.6278	1.3035e-07	TRUE	168.337	-2.97002	4.66743e-16	TRUE	7.30303	0.0914854	NA	FALSE	8559.13	-0.126378	0.999947	FALSE	8223.42	-0.182102	0.999981	FALSE	61.9343	-0.505344	0.999877	FALSE	2.82982	0.0193087	NA	FALSE
ENSG00000041802	LSG1	chr3:194361516-194393206	chr3:194390706-194395706	5485.81	0.611792	0.00291123	FALSE	4367.5	0.10428	0.416134	FALSE	5517.05	0.259055	0.351355	FALSE	40.9052	0.6241	0.49683	FALSE	1194.19	0.316002	0.0344538	FALSE	18.5913	0.0883844	0.92888	FALSE	267.776	0.0267623	0.967246	FALSE	55.7107	0.0241193	0.999947	FALSE	1839.29	-0.117905	0.999981	FALSE	22.5792	-0.233273	NA	FALSE	274.843	-0.0355643	0.994735	FALSE
ENSG00000041880	PARP3	chr3:51976360-51982883	chr3:51973860-51978860	2600.67	0.742367	0.0125923	FALSE	1282.16	0.246519	0.237888	FALSE	1573.36	0.344916	0.50937	FALSE	7.14898	0.440037	0.65271	FALSE	221.354	0.0905674	0.720344	FALSE	6.56103	0.0693306	NA	FALSE	370.655	-0.178629	0.662159	FALSE	12.2611	-0.382433	0.999947	FALSE	218.346	0.193651	0.999981	FALSE	10.4291	-0.3394	NA	FALSE	313.849	0.233926	0.963033	FALSE
ENSG00000041982	TNC	chr9:117782805-117880536	chr9:117878036-117883036	36203	1.35592	6.69253e-08	TRUE	4926.1	0.92426	0.137981	FALSE	14877.2	-1.20137	0.0877084	FALSE	151.236	0.231213	0.777072	FALSE	3291.61	0.649975	1.16682e-05	TRUE	5.85933	0.548171	NA	FALSE	313.996	0.204115	0.744114	FALSE	380.795	-0.523982	0.999947	FALSE	2062.38	0.220255	0.999981	FALSE	14.4345	-0.132096	NA	FALSE	106.395	0.300438	0.947993	FALSE
ENSG00000041988	THAP3	chr1:6684925-6695646	chr1:6682425-6687425	2206.59	-0.251357	0.139652	FALSE	1927.32	0.221993	0.00354175	FALSE	2894.36	0.213994	0.148103	FALSE	13.504	0.60806	0.520116	FALSE	443.803	0.0951008	0.637296	FALSE	8.50786	0.344597	NA	FALSE	172.568	-0.250645	0.558822	FALSE	17.9709	0.053025	0.999947	FALSE	611.277	-0.00165755	0.999981	FALSE	10.9614	0.00987207	NA	FALSE	232.15	0.284824	0.946367	FALSE
ENSG00000042062	FAM65C	chr20:49202644-49308065	chr20:49305565-49310565	101.523	0.517929	0.0378413	FALSE	54.2139	-0.214021	0.712985	FALSE	46.0875	0.659845	0.30415	FALSE	1112.4	0.386527	0.483676	FALSE	1093.09	-0.216618	0.305439	FALSE	208.831	-0.288934	0.561723	FALSE	21.7323	0.392082	0.566301	FALSE	583.579	-0.114524	0.999947	FALSE	1646.45	-0.0799735	0.999981	FALSE	112.859	-0.426573	0.999877	FALSE	11.693	0.150169	NA	FALSE
ENSG00000042088	TDP1	chr14:90421282-90511106	chr14:90418782-90423782	1759.95	0.325446	0.298984	FALSE	1801.34	0.350205	0.00140647	FALSE	2823.95	0.00695188	0.991687	FALSE	126.731	0.473852	0.553992	FALSE	3450.23	0.239014	0.0291835	FALSE	9.63438	0.409427	NA	FALSE	422.988	-0.0848463	0.861668	FALSE	124.348	0.139127	0.999947	FALSE	4176.56	0.00492404	0.999981	FALSE	14.3381	-0.00653835	NA	FALSE	495.923	0.0935188	0.986935	FALSE
ENSG00000042286	AIFM2	chr10:71857978-71892690	chr10:71890190-71895190	1441.6	-0.82563	0.00115859	FALSE	2451.6	-0.0375674	0.900512	FALSE	1458.62	-0.0860371	0.889492	FALSE	47.2863	0.4958	0.551239	FALSE	1299.79	0.0424041	0.79461	FALSE	8.14958	0.20889	NA	FALSE	152.78	-0.326897	0.436877	FALSE	60.9422	0.0318547	0.999947	FALSE	1892.64	-0.0502179	0.999981	FALSE	11.1791	-0.410274	NA	FALSE	289.61	0.0250724	0.995912	FALSE
ENSG00000042304	C2orf83	chr2:228474805-228498036	chr2:228495536-228500536	0	NA	NA	FALSE	0.396259	-2.00638	NA	FALSE	2.16391	-1.17627	NA	FALSE	387.26	-0.41867	0.444881	FALSE	185.389	-0.0711474	0.793194	FALSE	60.7742	-0.899454	0.132802	FALSE	20.0204	0.761688	0.210376	FALSE	171.668	-0.0701626	0.999947	FALSE	440.411	0.0489344	0.999981	FALSE	21.3675	-0.126453	NA	FALSE	53.3029	-0.287285	0.96354	FALSE
ENSG00000042317	SPATA7	chr14:88851267-88936694	chr14:88848767-88853767	600.999	0.0934262	0.706354	FALSE	567.334	-0.0710266	0.656232	FALSE	507.25	-0.305967	0.614568	FALSE	171.447	0.0700811	0.930453	FALSE	1484.98	-0.0289138	0.855731	FALSE	165.263	0.016645	0.979032	FALSE	192.31	0.320582	0.469673	FALSE	153.428	0.261796	0.999947	FALSE	2410.13	-0.120044	0.999981	FALSE	35.0837	0.125409	0.999877	FALSE	202.958	0.0290221	0.995551	FALSE
ENSG00000042429	MED17	chr11:93517392-93547861	chr11:93514892-93519892	3886.17	0.0812273	0.569131	FALSE	3037	0.347237	1.90323e-05	FALSE	2866.71	0.022376	0.978249	FALSE	43.0041	0.453234	0.596036	FALSE	1328.41	0.277255	0.0324746	FALSE	9.50707	0.147472	NA	FALSE	243.678	-0.362272	0.410138	FALSE	54.573	0.202125	0.999947	FALSE	2083.53	-0.0646832	0.999981	FALSE	14.3221	-0.248521	NA	FALSE	309.038	0.242995	0.963033	FALSE
ENSG00000042445	RETSAT	chr2:85569210-85581743	chr2:85579243-85584243	2651.34	-0.137439	0.7143	FALSE	6288.84	-0.174886	0.246724	FALSE	4679.83	-0.129957	0.8177	FALSE	12.8523	0.614405	0.532811	FALSE	437.923	0.174031	0.396316	FALSE	6.02739	0.810837	NA	FALSE	142.992	-0.231259	0.650015	FALSE	19.149	-0.170021	0.999947	FALSE	652.86	-0.0145026	0.999981	FALSE	10.1284	-0.0470081	NA	FALSE	156.724	0.118398	0.986935	FALSE
ENSG00000042493	CAPG	chr2:85621870-85645555	chr2:85643055-85648055	4087.4	0.846781	0.0130601	FALSE	7726.99	-0.655066	0.000489404	FALSE	5502.57	-0.331599	0.788965	FALSE	66.4215	0.189737	0.821036	FALSE	439.7	0.372981	0.128074	FALSE	8.12466	0.252477	NA	FALSE	301.461	-0.376872	0.298274	FALSE	43.77	-0.000120093	0.999947	FALSE	1002.4	-0.00730492	0.999981	FALSE	11.0531	-0.160789	NA	FALSE	400.182	-0.0233754	0.995958	FALSE
ENSG00000042753	AP2S1	chr19:47341392-47354249	chr19:47351749-47356749	9307.35	0.0712149	0.88112	FALSE	7474.05	0.184665	0.0409716	FALSE	9962.94	0.0845987	0.825312	FALSE	15.9921	0.275887	0.783751	FALSE	474.702	0.251393	0.145716	FALSE	13.0564	0.174943	NA	FALSE	373.526	-0.448731	0.290294	FALSE	22.0225	-0.0907749	0.999947	FALSE	718.848	-0.100938	0.999981	FALSE	12.5727	-0.219474	NA	FALSE	361.299	0.0600312	0.987606	FALSE
ENSG00000042781	USH2A	chr1:215796235-216596738	chr1:216594238-216599238	106.489	0.679532	0.0501814	FALSE	114.054	-0.449779	0.404391	FALSE	172.042	-1.59971	0.0240262	TRUE	32311.1	-0.534523	0.453375	FALSE	3247.31	0.226285	0.514633	FALSE	129.596	-1.79033	0.00121544	TRUE	15.2836	0.815951	NA	FALSE	4231.51	-0.101384	0.999947	FALSE	9102.24	0.273946	0.999981	FALSE	21.5726	-0.0793328	NA	FALSE	8.5282	0.0672854	NA	FALSE
ENSG00000042813	ZPBP	chr7:49890016-50160925	chr7:50158425-50163425	0	NA	NA	FALSE	0.504029	-2.3416	NA	FALSE	0.543653	1.83579	NA	FALSE	1483.53	-0.815777	0.0626246	FALSE	160.592	0.08981	0.818544	FALSE	56.0097	-2.00563	3.48574e-05	TRUE	4.74015	-0.0266242	NA	FALSE	1082.82	0.470685	0.999947	FALSE	812.037	0.810648	0.0824031	FALSE	30.9909	0.624372	0.916168	FALSE	1.69634	0.0935748	NA	FALSE
ENSG00000042832	TG	chr8:133879202-134147147	chr8:133876702-133881702	85.4872	-0.276189	0.562891	FALSE	448.158	-1.41682	3.70006e-10	TRUE	464.448	-2.49977	0.00125475	TRUE	3983.27	0.548507	0.245428	FALSE	2795.79	-0.435459	0.00512937	FALSE	275.264	0.318928	0.473033	FALSE	13.531	0.24578	NA	FALSE	1288.99	0.173572	0.999947	FALSE	5973.07	-0.533507	0.629107	FALSE	74.1212	-0.0728617	0.999877	FALSE	6.58495	0.0844985	NA	FALSE
ENSG00000042980	ADAM28	chr8:24151552-24216531	chr8:24149052-24154052	219.599	1.37029	0.205407	FALSE	35.7449	-2.2011	0.00669597	FALSE	193.647	-0.554614	0.819473	FALSE	1861.34	2.2569	1.1968e-10	TRUE	505.924	-0.726655	0.00345289	TRUE	141.235	2.31039	3.29922e-09	TRUE	19.9558	0.212307	0.766617	FALSE	1113.92	0.164202	0.999947	FALSE	510.786	-0.460878	0.999981	FALSE	70.3355	0.408723	0.999877	FALSE	13.341	-0.410833	NA	FALSE
ENSG00000043039	BARX2	chr11:129245834-129322171	chr11:129243334-129248334	27.029	-3.7038	4.42794e-06	FALSE	3.23333	-2.98881	0.0163613	FALSE	8.82006	0.883201	0.74822	FALSE	5529.69	0.829467	0.243999	FALSE	384.089	-0.822599	0.00196709	TRUE	834.124	0.813836	0.110385	FALSE	24.0006	-0.532941	0.414405	FALSE	2205.96	-0.139297	0.999947	FALSE	373.818	-0.300642	0.999981	FALSE	553.793	-0.309487	0.999877	FALSE	8.83793	0.16262	NA	FALSE
ENSG00000043093	DCUN1D1	chr3:182655861-182703741	chr3:182701241-182706241	3548.8	-0.364505	0.0181462	FALSE	3026.54	0.138614	0.197819	FALSE	4653.96	-0.0591793	0.900234	FALSE	74.0657	0.443062	0.568238	FALSE	1096.41	0.179494	0.252124	FALSE	27.2247	0.231981	0.774461	FALSE	9.72261	0.580924	NA	FALSE	100.241	0.122496	0.999947	FALSE	1913.17	0.04367	0.999981	FALSE	21.7545	0.144299	NA	FALSE	5.58083	0.203857	NA	FALSE
ENSG00000043143	JADE2	chr5:133860002-133918918	chr5:133857502-133862502	3278.01	1.05938	0.000113435	TRUE	4275.35	-0.342678	0.000951607	FALSE	6154.15	0.370622	0.411898	FALSE	133.555	-0.497245	0.523555	FALSE	1940.38	0.799436	9.10427e-08	TRUE	30.5874	-1.05199	0.130062	FALSE	453.489	0.110539	0.813937	FALSE	111.224	-0.0834151	0.999947	FALSE	3514.25	-0.0639325	0.999981	FALSE	27.2923	-0.371108	0.999877	FALSE	873.914	0.252714	0.944892	FALSE
ENSG00000043355	ZIC2	chr13:100634025-100639018	chr13:100631525-100636525	24.003	4.09178	1.2338e-09	FALSE	15.2443	0.723564	0.405284	FALSE	6.82902	-0.00268258	0.999648	FALSE	58.333	-0.318212	0.679925	FALSE	24.0878	0.243841	NA	FALSE	80.2636	-0.338945	0.53704	FALSE	10.4751	0.3345	NA	FALSE	62.232	-0.333626	0.999947	FALSE	50.0569	0.0667821	0.999981	FALSE	78.8055	-0.14207	0.999877	FALSE	4.96762	0.0497871	NA	FALSE
ENSG00000043462	LCP2	chr5:169673240-169725231	chr5:169722731-169727731	49.8544	3.59091	4.84529e-13	FALSE	90.3176	0.139409	0.777443	FALSE	149.497	0.505867	0.842281	FALSE	2822.37	-0.552792	0.153308	FALSE	317.556	0.868733	9.18798e-05	TRUE	110.153	-0.570071	0.230625	FALSE	30.6999	1.06172	0.0359988	TRUE	704.531	0.0693127	0.999947	FALSE	1134.59	-0.129146	0.999981	FALSE	41.2032	0.0314035	0.999877	FALSE	45.174	0.0836968	0.98711	FALSE
ENSG00000043514	TRIT1	chr1:40306722-40349183	chr1:40346683-40351683	1591.26	-0.0211377	0.913001	FALSE	1108.55	0.259335	0.00836053	FALSE	896.151	0.226144	0.557253	FALSE	55.6052	0.780618	0.34691	FALSE	1237.65	0.101284	0.506128	FALSE	12.2219	0.931082	NA	FALSE	120.4	-0.117748	0.833031	FALSE	67.3997	0.0176792	0.999947	FALSE	1730.6	-0.0604714	0.999981	FALSE	12.7837	-0.208154	NA	FALSE	78.5947	0.30709	0.951685	FALSE
ENSG00000043591	ADRB1	chr10:115803805-115806667	chr10:115801305-115806305	0	NA	NA	FALSE	0.528185	-2.38511	NA	FALSE	7.70849	0.053485	0.993989	FALSE	49.0014	0.511016	0.53668	FALSE	11.004	-0.1771	NA	FALSE	79.2611	0.342019	0.635089	FALSE	13.5797	-0.155721	NA	FALSE	119.899	0.000207057	0.999947	FALSE	29.0893	0.248665	NA	FALSE	183.689	-0.0120182	0.999877	FALSE	10.3119	0.360298	NA	FALSE
ENSG00000044012	GUCA2B	chr1:42619091-42621495	chr1:42616591-42621591	0.0866482	0.782017	NA	FALSE	0.128095	-0.706327	NA	FALSE	0.200606	1.27773	NA	FALSE	108.212	0.725977	0.201156	FALSE	14.3962	-0.313143	NA	FALSE	297.008	0.546068	0.226804	FALSE	14.5549	0.28279	NA	FALSE	61.8923	0.094064	0.999947	FALSE	15.3566	-0.186613	NA	FALSE	137.262	0.19455	0.999877	FALSE	5.86421	0.151513	NA	FALSE
ENSG00000044090	CUL7	chr6:43005354-43021683	chr6:43019183-43024183	9431.04	0.641264	0.00131801	FALSE	4381.43	0.177161	0.426767	FALSE	4171.96	0.0555149	0.961779	FALSE	17.8161	0.305368	0.754035	FALSE	719.829	0.255654	0.121391	FALSE	8.28684	0.41791	NA	FALSE	298.329	-0.375804	0.348458	FALSE	20.8582	-0.117209	0.999947	FALSE	845.447	-0.0992564	0.999981	FALSE	8.37797	-0.0954612	NA	FALSE	307.03	0.0871823	0.986935	FALSE
ENSG00000044115	CTNNA1	chr5:137946655-138270723	chr5:137944155-137949155	42869.4	-0.466	0.00202859	FALSE	38297.6	0.0697144	0.758515	FALSE	33502.4	-0.294085	0.14174	FALSE	3644.63	0.299598	0.521768	FALSE	6271.75	0.05921	0.643183	FALSE	122.736	0.247909	0.634058	FALSE	16.3981	0.668533	NA	FALSE	1892.71	-0.230282	0.999947	FALSE	10939	-0.134686	0.999981	FALSE	39.8146	0.167584	0.999877	FALSE	10.4981	0.206662	NA	FALSE
ENSG00000044446	PHKA2	chrX:18910417-19002716	chrX:19000216-19005216	1627.77	0.0831796	0.713411	FALSE	1327.02	0.0908117	0.54484	FALSE	1344.55	0.0475444	0.909131	FALSE	59.7626	0.520693	0.491069	FALSE	1415.87	0.053279	0.737911	FALSE	3.34935	0.21862	NA	FALSE	245.942	-0.239903	0.63116	FALSE	69.9212	0.212964	0.999947	FALSE	1790.67	-0.110638	0.999981	FALSE	7.89808	-0.103126	NA	FALSE	421.716	0.162959	0.977409	FALSE
ENSG00000044459	CNTLN	chr9:17134979-17503921	chr9:17132479-17137479	1981.93	0.219442	0.191541	FALSE	2011.09	-0.144054	0.207987	FALSE	1919.27	-0.189105	0.761878	FALSE	603.444	0.321186	0.638541	FALSE	6156.66	0.107649	0.454131	FALSE	10.7251	-0.00514354	NA	FALSE	189.525	-0.1101	0.833748	FALSE	713.914	0.282586	0.999947	FALSE	9662.03	-0.019066	0.999981	FALSE	15.9785	-0.0859424	NA	FALSE	370.283	0.225816	0.969338	FALSE
ENSG00000044524	EPHA3	chr3:89156673-89531284	chr3:89154173-89159173	37.4329	1.75806	0.000997964	FALSE	4.89256	0.73862	0.596103	FALSE	5101.97	-1.31551	0.00523419	TRUE	1439.28	-0.350598	0.53321	FALSE	3637.61	0.362592	0.0236027	FALSE	26.7046	-0.211871	0.792986	FALSE	19.7304	0.652528	0.27435	FALSE	1508.26	-0.0502593	0.999947	FALSE	4058.58	0.364998	0.999981	FALSE	33.385	-0.213767	0.999877	FALSE	6.56635	0.127034	NA	FALSE
ENSG00000044574	HSPA5	chr9:127997131-128003609	chr9:128001109-128006109	26884.9	-0.376314	0.359437	FALSE	30763.5	0.0124204	0.977297	FALSE	48568.2	-0.423145	0.100273	FALSE	7.89349	0.334801	0.737077	FALSE	224.776	0.300179	0.149926	FALSE	6.51391	0.714633	NA	FALSE	417.718	-0.534813	0.202464	FALSE	12.7977	-0.074671	0.999947	FALSE	425.997	-0.104857	0.999981	FALSE	13.0033	-0.283871	NA	FALSE	347.969	-0.0459351	0.99047	FALSE
ENSG00000046604	DSG2	chr18:29078005-29128971	chr18:29075505-29080505	9242.46	-1.25749	0.026869	TRUE	4811.67	-2.27644	1.35583e-13	TRUE	37860.1	-0.817698	0.00115246	FALSE	115.05	1.23281	0.00422012	TRUE	1289.32	-0.151619	0.552179	FALSE	42.1604	0.644763	0.331734	FALSE	162.749	-0.722168	0.064505	FALSE	403.397	0.751971	0.921113	FALSE	1830.15	-0.319342	0.999981	FALSE	88.941	0.558559	0.993904	FALSE	200.339	-0.350367	0.90976	FALSE
ENSG00000046647	GEMIN8	chrX:14026397-14048012	chrX:14045512-14050512	647.29	0.335425	0.051911	FALSE	452.711	0.0803998	0.765921	FALSE	500.401	0.331005	0.578253	FALSE	15.2271	0.201898	0.834342	FALSE	322.7	0.290981	0.0992748	FALSE	2.94407	0.389393	NA	FALSE	207.73	0.596854	0.146496	FALSE	20.3703	0.0778154	0.999947	FALSE	424.601	-0.260839	0.999981	FALSE	10.525	-0.176047	NA	FALSE	241.464	0.0832441	0.986935	FALSE
ENSG00000046651	OFD1	chrX:13752831-13787480	chrX:13750331-13755331	1760.29	0.418008	0.0160892	FALSE	1378.44	-0.263436	0.00454418	FALSE	1418.23	0.0985438	0.829824	FALSE	23.3993	0.353034	0.67451	FALSE	716.95	0.227148	0.136237	FALSE	3.81019	0.388541	NA	FALSE	165.306	-0.104358	0.855856	FALSE	38.8129	-0.029973	0.999947	FALSE	1126.53	-0.0943323	0.999981	FALSE	6.04824	-0.0837749	NA	FALSE	188.95	-0.0369229	0.994735	FALSE
ENSG00000046653	GPM6B	chrX:13789149-13956757	chrX:13954257-13959257	124.121	0.837697	0.0161856	FALSE	57.4891	-0.649507	0.0432838	FALSE	89.9766	-0.323635	0.490864	FALSE	3169.92	0.424207	0.375818	FALSE	566.752	-0.212881	0.207849	FALSE	144.238	-0.0402437	0.948287	FALSE	10.8115	0.278812	NA	FALSE	1976.64	-0.109746	0.999947	FALSE	897.391	0.029712	0.999981	FALSE	154.687	-0.974875	0.364442	FALSE	6.855	0.193359	NA	FALSE
ENSG00000046774	MAGEC2	chrX:141290130-141293076	chrX:141290576-141295576	11262.3	-0.944971	0.00013198	FALSE	11850	0.105403	0.66589	FALSE	15161.7	0.0376641	0.95412	FALSE	3.51455	0.767849	NA	FALSE	44.4821	0.231272	0.492079	FALSE	9.85525	0.840026	NA	FALSE	127.268	-0.106561	0.875417	FALSE	3.43806	-0.134961	NA	FALSE	84.0134	-0.127179	0.999981	FALSE	6.35147	-0.00830772	NA	FALSE	121.461	-0.0422732	0.994329	FALSE
ENSG00000046889	PREX2	chr8:68864352-69149265	chr8:68861852-68866852	2.48612	1.78375	0.331702	FALSE	14.571	-0.394535	0.521308	FALSE	362.624	-2.39066	0.186668	FALSE	16602.7	-0.385989	0.399658	FALSE	503.517	-0.459938	0.0788017	FALSE	522.221	-0.0972446	0.845417	FALSE	13.9649	-0.19145	NA	FALSE	3080.45	-0.306614	0.999947	FALSE	1312.1	-0.355698	0.999981	FALSE	211.657	-0.277287	0.999877	FALSE	9.68555	0.103219	NA	FALSE
ENSG00000047056	WDR37	chr10:1095477-1178237	chr10:1092977-1097977	2070.44	-0.092563	0.539655	FALSE	1669.19	0.337199	3.59013e-08	FALSE	3157.22	0.208387	0.604475	FALSE	115.123	0.797579	0.216469	FALSE	3165.24	0.17023	0.0968197	FALSE	7.35728	0.605266	NA	FALSE	458.12	-0.380342	0.413929	FALSE	155.188	-0.103272	0.999947	FALSE	4244.48	-0.023434	0.999981	FALSE	16.5785	-0.224637	NA	FALSE	597.198	0.214161	0.96875	FALSE
ENSG00000047188	YTHDC2	chr5:112849379-112930982	chr5:112846879-112851879	3706.09	-0.143366	0.614572	FALSE	3899.91	-0.0078224	0.96357	FALSE	4488.33	-0.20354	0.416742	FALSE	108.453	0.518875	0.504282	FALSE	2463.02	0.13294	0.237158	FALSE	7.88268	0.158495	NA	FALSE	226.355	-0.0789779	0.889397	FALSE	167.816	0.185902	0.999947	FALSE	4417.26	-0.0883181	0.999981	FALSE	19.6687	-0.0607834	NA	FALSE	358.321	-0.0082724	0.999209	FALSE
ENSG00000047230	CTPS2	chrX:16606125-16731059	chrX:16728559-16733559	1389.56	-0.643277	0.000322035	FALSE	1240.03	0.0384719	0.893591	FALSE	1089.57	0.0840494	0.894166	FALSE	77.1781	0.480901	0.531942	FALSE	1712.53	0.128382	0.288984	FALSE	3.6049	0.521583	NA	FALSE	115.342	-0.425596	0.375108	FALSE	93.4938	0.201204	0.999947	FALSE	2378.11	-0.169146	0.999981	FALSE	4.97571	0.331584	NA	FALSE	171.298	0.213335	0.977023	FALSE
ENSG00000047249	ATP6V1H	chr8:54628116-54756118	chr8:54753618-54758618	5603.13	-0.965301	7.00133e-05	FALSE	6303.28	-0.106658	0.410553	FALSE	4474.79	-0.021344	0.976244	FALSE	165.756	0.588584	0.416741	FALSE	3716.84	0.0383222	0.797949	FALSE	8.83136	0.404	NA	FALSE	366.463	-0.775379	0.014422	FALSE	210.62	0.016205	0.999947	FALSE	6160.77	-0.28974	0.999981	FALSE	16.4971	-0.385541	NA	FALSE	456.047	-0.139772	0.984191	FALSE
ENSG00000047315	POLR2B	chr4:57843887-57897334	chr4:57841387-57846387	19765.7	-0.268582	0.337713	FALSE	17450.3	0.0848295	0.489094	FALSE	17970.9	-0.0320538	0.967422	FALSE	65.9489	0.529289	0.504684	FALSE	2158.15	0.206641	0.0898755	FALSE	5.70027	0.471507	NA	FALSE	311.315	-0.440569	0.323938	FALSE	90.2623	0.168679	0.999947	FALSE	3555.06	-0.109521	0.999981	FALSE	13.8995	-0.0513493	NA	FALSE	330.605	0.177106	0.977409	FALSE
ENSG00000047346	FAM214A	chr15:52873513-53002014	chr15:52999514-53004514	1998.48	0.520969	0.041742	FALSE	1146.47	-0.0697883	0.795607	FALSE	2790.25	-0.365451	0.0728808	FALSE	582	-0.473514	0.319031	FALSE	3273.83	0.249633	0.0847979	FALSE	62.9057	-0.54643	0.308907	FALSE	19.3278	0.67574	0.260616	FALSE	383.351	0.00577438	0.999947	FALSE	5801.92	-0.0957081	0.999981	FALSE	19.828	0.0815532	NA	FALSE	9.88104	0.112995	NA	FALSE
ENSG00000047365	ARAP2	chr4:35949842-36246131	chr4:36243631-36248631	2032.7	-0.167628	0.613891	FALSE	2858.23	-1.27066	3.87277e-25	TRUE	5885.28	-0.328666	0.358757	FALSE	1474.51	-0.835787	0.15334	FALSE	4084.69	0.196181	0.34068	FALSE	36.5805	0.530858	0.459233	FALSE	151.697	-0.0405334	0.946717	FALSE	1158.36	0.167582	0.999947	FALSE	8484.32	-0.371161	0.999981	FALSE	26.5839	-0.035111	0.999877	FALSE	433.936	-0.217604	0.977023	FALSE
ENSG00000047410	TPR	chr1:186280783-186344825	chr1:186342325-186347325	20637.9	0.172489	0.586612	FALSE	12757	0.127135	0.54416	FALSE	13100.3	-0.244265	0.29809	FALSE	94.1039	0.655642	0.416383	FALSE	2907.4	0.25286	0.0472284	FALSE	8.2349	0.386721	NA	FALSE	422.509	-0.189502	0.709927	FALSE	116.317	0.289433	0.999947	FALSE	4473.76	0.0705747	0.999981	FALSE	10.782	-0.151193	NA	FALSE	393.504	0.0484385	0.990135	FALSE
ENSG00000047457	CP	chr3:148880196-148939842	chr3:148937342-148942342	2164.26	2.08907	2.28619e-08	TRUE	1316.64	-0.407093	6.92286e-06	FALSE	1220.57	0.10855	0.830208	FALSE	219.979	-0.504124	0.426987	FALSE	1186.46	0.454798	0.00269558	FALSE	15.8014	-0.56908	0.477336	FALSE	59.253	1.05571	0.0137722	TRUE	183.097	0.202773	0.999947	FALSE	2266.17	0.0180256	0.999981	FALSE	14.6542	0.058774	NA	FALSE	59.1856	-0.853039	0.174367	FALSE
ENSG00000047578	KIAA0556	chr16:27561453-27791690	chr16:27558953-27563953	2615.44	0.680173	0.000438321	FALSE	1784.95	0.0507107	0.871468	FALSE	1738.86	-0.05068	0.962175	FALSE	373.259	0.166178	0.805557	FALSE	5973.95	0.0547808	0.719968	FALSE	6.41796	0.305844	NA	FALSE	350.084	0.253632	0.554835	FALSE	392.935	-0.0358693	0.999947	FALSE	7119.13	-0.236718	0.999981	FALSE	12.3396	-0.0250568	NA	FALSE	264.162	-0.0132717	0.998322	FALSE
ENSG00000047579	DTNBP1	chr6:15523031-15663289	chr6:15660789-15665789	256.293	-0.312494	0.287874	FALSE	253.962	-0.325859	0.0348578	FALSE	562.701	0.136798	0.851609	FALSE	272.576	0.605001	0.310701	FALSE	2868.62	-0.0472327	0.774861	FALSE	101.641	0.833174	0.060198	FALSE	150.439	-0.486768	0.30179	FALSE	260.791	0.188896	0.999947	FALSE	4493.91	-0.107055	0.999981	FALSE	52.0667	-0.036358	0.999877	FALSE	223.684	0.287866	0.943035	FALSE
ENSG00000047597	XK	chrX:37545011-37591383	chrX:37542511-37547511	124.597	-2.65555	0.00025478	TRUE	5.17854	-1.49442	0.196511	FALSE	1.06	3.61893	NA	FALSE	386.549	2.76872	8.59767e-16	TRUE	208.088	-0.976564	0.000132728	TRUE	23.5913	2.84341	1.22419e-05	FALSE	51.1219	-1.4852	0.000781958	TRUE	297.042	-0.0275073	0.999947	FALSE	116.774	-0.311524	0.999981	FALSE	33.8394	-0.185188	0.999877	FALSE	10.7056	-0.287774	NA	FALSE
ENSG00000047617	ANO2	chr12:5641034-6055398	chr12:6052898-6057898	1565.32	-3.15404	5.88661e-07	TRUE	926.73	1.22012	0.418	FALSE	338.636	-1.54316	0.0105849	TRUE	13767.8	1.77232	1.35474e-05	TRUE	3540.31	-0.578632	0.0464383	FALSE	341.132	1.32974	0.00175692	TRUE	34.5151	-0.701289	0.243863	FALSE	6944.1	0.0128163	0.999947	FALSE	8905.66	0.136104	0.999981	FALSE	256.025	-0.0866123	0.999877	FALSE	60.9285	0.273042	0.850996	FALSE
ENSG00000047621	C12orf4	chr12:4596893-4647674	chr12:4645174-4650174	2679.93	-0.511301	5.19028e-05	FALSE	3789.43	1.02505	0.00124659	TRUE	4223.47	-0.0223122	0.974948	FALSE	63.4729	0.22638	0.789193	FALSE	1418.12	0.0942937	0.494195	FALSE	5.08418	0.399965	NA	FALSE	237.742	0.0465717	0.930467	FALSE	160.833	0.777653	0.840658	FALSE	3467.75	0.642726	0.422783	FALSE	22.9467	0.257293	NA	FALSE	366.942	0.314674	0.940989	FALSE
ENSG00000047634	SCML1	chrX:17755587-17773105	chrX:17753087-17758087	48.2864	2.53231	3.89396e-05	FALSE	17.7094	-0.242946	0.776741	FALSE	4.06645	1.26231	NA	FALSE	192.246	-0.28828	0.668622	FALSE	79.0165	-0.0506149	0.88473	FALSE	9.84131	0.811491	NA	FALSE	71.7062	-0.807274	0.132876	FALSE	51.3275	0.266964	0.999947	FALSE	175.484	0.0193468	0.999981	FALSE	8.48221	0.260763	NA	FALSE	37.1049	0.0493823	0.993127	FALSE
ENSG00000047644	WWC3	chrX:9983601-10112518	chrX:9981101-9986101	4707.43	0.92635	7.11769e-07	FALSE	3367.52	0.0470039	0.751807	FALSE	4537.72	-0.0158734	0.986166	FALSE	121.619	0.395681	0.60658	FALSE	2003.24	0.00911821	0.960642	FALSE	6.82357	0.947011	NA	FALSE	248.43	-0.686465	0.159922	FALSE	144.484	0.1029	0.999947	FALSE	2910.52	-0.249423	0.999981	FALSE	13.1866	-0.295582	NA	FALSE	501.239	0.22287	0.972714	FALSE
ENSG00000047648	ARHGAP6	chrX:11136238-11683821	chrX:11681321-11686321	502.459	-1.15707	0.000958665	TRUE	73.4026	1.97655	0.0853541	FALSE	431.156	0.322393	0.75243	FALSE	962.74	0.641881	0.324729	FALSE	4028.36	-0.222338	0.128603	FALSE	50.7366	0.44055	0.54969	FALSE	38.7705	-0.458481	0.441003	FALSE	2725.13	0.127467	0.999947	FALSE	4014.55	0.0981929	0.999981	FALSE	152.749	-0.606631	0.938637	FALSE	37.6763	0.778114	0.152127	FALSE
ENSG00000047662	FAM184B	chr4:17630928-17783135	chr4:17780635-17785635	474.764	-0.0458082	0.906664	FALSE	370.376	-0.370331	0.147989	FALSE	556.025	-0.131934	0.828946	FALSE	3724.36	0.780029	0.0365469	FALSE	1096.19	-0.326599	0.0507083	FALSE	204.972	0.827051	0.0441797	FALSE	20.8872	-0.260969	0.721515	FALSE	1597.28	0.181981	0.999947	FALSE	2080.81	-0.137548	0.999981	FALSE	195.749	-0.42557	0.999877	FALSE	11.5243	0.0211887	NA	FALSE
ENSG00000047849	MAP4	chr3:47892181-48130769	chr3:48128269-48133269	21671.6	-0.302058	0.422396	FALSE	9394.41	-0.167405	0.596746	FALSE	55768	-0.357875	0.09085	FALSE	265.77	0.731391	0.337254	FALSE	6980.21	0.0717332	0.574228	FALSE	5.4229	0.906469	NA	FALSE	617.862	-0.553994	0.117795	FALSE	307.642	0.174534	0.999947	FALSE	9523.36	-0.0671708	0.999981	FALSE	13.9897	-0.459262	NA	FALSE	604.256	0.241996	0.954	FALSE
ENSG00000047932	GOPC	chr6:117639373-117923691	chr6:117921191-117926191	9130.04	-0.874531	0.00040615	FALSE	12788.1	0.416273	0.000931205	FALSE	7737.96	-0.404234	0.288613	FALSE	793.408	0.715068	0.103784	FALSE	5871.87	0.103458	0.556927	FALSE	7.79155	0.426361	NA	FALSE	215.405	-0.528038	0.194913	FALSE	789.057	0.107348	0.999947	FALSE	11614.7	0.0717525	0.999981	FALSE	13.2887	-0.165039	NA	FALSE	298.375	-0.0923552	0.986935	FALSE
ENSG00000047936	ROS1	chr6:117609462-117747018	chr6:117744518-117749518	810.125	-2.60036	7.42545e-05	TRUE	506.103	1.02228	0.00103021	TRUE	8407.96	-0.59956	0.886012	FALSE	672.758	1.25513	0.000420295	TRUE	1719.77	-0.460912	0.018875	FALSE	18.4736	0.488957	0.540348	FALSE	17.7006	0.137723	0.858613	FALSE	500.218	0.0309149	0.999947	FALSE	3422.01	0.278831	0.999981	FALSE	11.5184	0.165017	NA	FALSE	50.5937	0.483289	0.799169	FALSE
ENSG00000048028	USP28	chr11:113668595-113746292	chr11:113743792-113748792	2604.69	0.166763	0.459877	FALSE	2314.56	-0.00734531	0.974679	FALSE	2917.69	-0.306566	0.315868	FALSE	130.493	0.226656	0.752102	FALSE	2139.79	0.0802581	0.587598	FALSE	9.73677	-0.124615	NA	FALSE	191.509	-0.274484	0.599775	FALSE	142.164	0.0339496	0.999947	FALSE	2944.34	-0.0772499	0.999981	FALSE	15.5919	0.132017	NA	FALSE	231.491	0.265826	0.951685	FALSE
ENSG00000048052	HDAC9	chr7:18126571-19042039	chr7:18124071-18129071	4837.15	0.07295	0.881488	FALSE	8369.68	0.466249	0.127853	FALSE	5806.27	-0.239064	0.660789	FALSE	4587.01	0.462557	0.322284	FALSE	13566.3	0.0719427	0.681941	FALSE	88.633	1.25559	0.00226517	TRUE	42.2875	-0.684231	0.199854	FALSE	7279.57	0.756908	0.840658	FALSE	38908.9	0.630297	0.314413	FALSE	213.139	0.0109721	0.999877	FALSE	54.5602	0.761819	0.289932	FALSE
ENSG00000048140	TSPAN17	chr5:176074387-176086058	chr5:176071887-176076887	4285.3	-0.61497	2.26326e-05	FALSE	4659.73	-0.0540066	0.860299	FALSE	5045.71	0.0586881	0.908287	FALSE	20.8207	0.833015	0.355796	FALSE	363.799	-0.0738693	0.782899	FALSE	12.9701	0.648439	NA	FALSE	179.436	-0.205837	0.621504	FALSE	22.9819	-0.0981213	0.999947	FALSE	487.47	0.00722986	0.999981	FALSE	15.712	-0.0500424	NA	FALSE	220.092	0.0759996	0.986935	FALSE
ENSG00000048162	NOP16	chr5:175810948-175815976	chr5:175813476-175818476	2957.43	0.415557	0.370845	FALSE	1614.41	0.360316	0.0767641	FALSE	3894.81	0.316775	0.521119	FALSE	7.1315	0.276785	0.786602	FALSE	196.499	0.311193	0.147716	FALSE	6.98619	0.302414	NA	FALSE	319.763	-0.122077	0.827713	FALSE	8.10601	-0.290114	NA	FALSE	260.596	0.0693609	0.999981	FALSE	10.9233	-0.188141	NA	FALSE	247.787	0.10258	0.986935	FALSE
ENSG00000048342	CC2D2A	chr4:15471488-15603180	chr4:15468988-15473988	2130.82	0.336911	0.0872255	FALSE	1434.3	0.0056067	0.988027	FALSE	1908.41	-0.445511	0.00306552	FALSE	237.577	0.194716	0.764531	FALSE	3639	0.199722	0.194046	FALSE	42.2288	0.600865	0.316645	FALSE	119.766	0.0690704	0.91658	FALSE	256.538	0.257693	0.999947	FALSE	5694.7	-0.0759641	0.999981	FALSE	18.7486	0.0415641	NA	FALSE	54.1311	0.0825689	0.987255	FALSE
ENSG00000048392	RRM2B	chr8:103216729-103251346	chr8:103248846-103253846	14462.8	0.308176	0.5511	FALSE	24478.6	-0.250893	0.130628	FALSE	17940.9	0.00642363	0.994752	FALSE	45.5072	0.709996	0.406858	FALSE	1334.28	0.383264	0.00959231	FALSE	7.43881	0.632438	NA	FALSE	513.004	-0.0332113	0.955498	FALSE	81.461	-0.0128065	0.999947	FALSE	2935.64	-0.191605	0.999981	FALSE	17.8101	-0.541069	NA	FALSE	860.688	-0.248555	0.942943	FALSE
ENSG00000048405	ZNF800	chr7:126986843-127071978	chr7:127069478-127074478	2283.66	0.20538	0.524084	FALSE	1150.49	-0.466328	3.90476e-06	FALSE	4636.01	0.168787	0.561764	FALSE	674.555	1.58607	2.49433e-06	TRUE	1821.47	0.0250437	0.876532	FALSE	25.925	1.09899	0.065213	FALSE	12.1203	0.105294	NA	FALSE	395.771	-0.115519	0.999947	FALSE	2581.93	-0.167022	0.999981	FALSE	26.8045	-0.32736	0.999877	FALSE	2.7688	-0.0641539	NA	FALSE
ENSG00000048462	TNFRSF17	chr16:12058963-12061925	chr16:12056463-12061463	15.8381	1.05567	0.0596354	FALSE	9.73996	1.13387	0.0506712	FALSE	6.51701	1.39502	0.414702	FALSE	9.298	0.0681616	0.951613	FALSE	48.5425	0.212384	0.520209	FALSE	12.7111	0.178689	NA	FALSE	15.8082	0.2952	NA	FALSE	10.5426	0.0359352	NA	FALSE	53.1031	-0.278111	0.999981	FALSE	13.1713	0.0675226	NA	FALSE	9.29577	0.072566	NA	FALSE
ENSG00000048471	SNX29	chr16:12070593-12668146	chr16:12068093-12073093	2662.36	-0.060438	0.838307	FALSE	2260.14	0.0644348	0.821108	FALSE	4101.18	-0.45919	0.217042	FALSE	1636.88	0.0710746	0.893085	FALSE	9738.02	-0.156711	0.350122	FALSE	4.36181	0.646464	NA	FALSE	228.296	-0.0289313	0.955573	FALSE	1304.33	0.123527	0.999947	FALSE	13696.5	-0.302864	0.999981	FALSE	10.1451	-0.362728	NA	FALSE	264.086	-0.04623	0.990605	FALSE
ENSG00000048540	LMO3	chr12:16701306-16763528	chr12:16761028-16766028	78.3015	-0.916885	0.281451	FALSE	1479.77	3.48708	3.6819e-08	TRUE	1629.96	-3.20707	0.0107197	TRUE	1187.3	-0.0278623	0.97974	FALSE	429.749	-0.805213	0.00421913	TRUE	61.0391	-0.061848	0.960678	FALSE	48.9567	-0.355006	0.582144	FALSE	343.733	0.61541	0.999947	FALSE	2434.46	0.999589	0.0039899	TRUE	19.6978	0.366811	NA	FALSE	223.806	1.1534	0.00276025	TRUE
ENSG00000048544	MRPS10	chr6:42174538-42185603	chr6:42183103-42188103	4793.8	-0.0553771	0.902673	FALSE	3763.3	0.137672	0.345759	FALSE	3568.3	0.225515	0.326538	FALSE	11.1723	0.51588	0.599583	FALSE	323.433	0.437515	0.0261896	FALSE	8.00539	0.853875	NA	FALSE	125.995	-0.108103	0.863554	FALSE	20.5277	0.214044	0.999947	FALSE	689.127	0.0676497	0.999981	FALSE	7.18829	-0.173276	NA	FALSE	162.104	0.196009	0.977409	FALSE
ENSG00000048545	GUCA1A	chr6:42123143-42147794	chr6:42120643-42125643	0.118068	0.859687	NA	FALSE	0.241529	0.736352	NA	FALSE	0.115942	0.665147	NA	FALSE	367.277	1.16709	0.000781905	TRUE	187.27	-0.445659	0.075187	FALSE	88.1325	1.07153	0.0157081	TRUE	12.4537	0.502062	NA	FALSE	210.597	-0.070099	0.999947	FALSE	279.813	0.183655	0.999981	FALSE	30.7479	0.137241	0.999877	FALSE	5.53245	0.0403273	NA	FALSE
ENSG00000048649	RSF1	chr11:77371040-77532063	chr11:77529563-77534563	4407.58	-0.0312324	0.914124	FALSE	3384.61	-0.0985183	0.418124	FALSE	5146.48	-0.23679	0.262858	FALSE	224.285	0.744131	0.303691	FALSE	4500.18	0.159515	0.137776	FALSE	7.1695	0.283921	NA	FALSE	272.92	-0.375589	0.294671	FALSE	275.336	0.222676	0.999947	FALSE	7265.3	-0.0408733	0.999981	FALSE	12.9133	-0.426068	NA	FALSE	349.439	0.253122	0.954346	FALSE
ENSG00000048707	VPS13D	chr1:12290123-12572099	chr1:12287623-12292623	8197.01	0.0390286	0.931913	FALSE	8229.25	-0.179287	0.00278847	FALSE	14616.6	-0.308628	0.0750717	FALSE	417.346	0.463026	0.533633	FALSE	9195.88	0.104922	0.30018	FALSE	28.9791	0.462443	0.579571	FALSE	181.044	-0.259704	0.521322	FALSE	485.686	0.120244	0.999947	FALSE	13734	-0.256629	0.999981	FALSE	21.0532	-0.31244	NA	FALSE	312.869	-0.0393296	0.994086	FALSE
ENSG00000048740	CELF2	chr10:11047258-11378674	chr10:11044758-11049758	456.21	0.99451	0.0184131	FALSE	577.128	-1.85078	0.0404014	TRUE	3772.47	-0.270468	0.888235	FALSE	10800.2	-0.144388	0.798054	FALSE	2579.68	0.0464817	0.877871	FALSE	81.9627	-0.168134	0.823796	FALSE	26.4266	0.919429	0.0747339	FALSE	6707.14	0.0592449	0.999947	FALSE	4915.37	-0.144614	0.999981	FALSE	157.986	0.334129	0.999877	FALSE	22.5766	-0.481818	0.761345	FALSE
ENSG00000048828	FAM120A	chr9:96214003-96328397	chr9:96211503-96216503	12373.8	0.0684195	0.908672	FALSE	4844.16	-0.113892	0.501494	FALSE	27135.8	-0.173294	0.724233	FALSE	144.494	0.613673	0.478023	FALSE	3948.41	0.221568	0.0339181	FALSE	8.24069	0.91348	NA	FALSE	385.55	-0.633604	0.0802993	FALSE	173.196	0.325153	0.999947	FALSE	5047.57	-0.0611391	0.999981	FALSE	23.021	-0.0322564	NA	FALSE	677.628	0.252323	0.946367	FALSE
ENSG00000048991	R3HDM1	chr2:136289024-136482840	chr2:136286524-136291524	1025.92	0.115459	0.823024	FALSE	526.567	-0.00726115	0.981765	FALSE	5045.19	-0.0611898	0.911808	FALSE	286.185	0.52913	0.44271	FALSE	4727.14	0.0879899	0.44393	FALSE	8.21371	0.438088	NA	FALSE	357.813	-0.23969	0.607791	FALSE	365.97	0.308382	0.999947	FALSE	7110.6	0.107567	0.999981	FALSE	13.4714	-0.0754316	NA	FALSE	382.794	0.190944	0.977023	FALSE
ENSG00000049089	COL9A2	chr1:40766158-40783488	chr1:40780988-40785988	178.27	-0.0830197	0.91466	FALSE	57.6139	0.954272	0.00103673	FALSE	155.836	-0.188625	0.915606	FALSE	206.812	0.835876	0.0905561	FALSE	164.158	-0.275521	0.314435	FALSE	159.696	0.710385	0.0949107	FALSE	30.1801	0.230487	0.746626	FALSE	282.124	-0.363939	0.999947	FALSE	255.278	0.0143858	0.999981	FALSE	225.228	-0.440998	0.999877	FALSE	12.8209	0.288114	NA	FALSE
ENSG00000049130	KITLG	chr12:88886569-88974628	chr12:88972128-88977128	6.20153	1.76365	0.15045	FALSE	5.47732	-0.964686	0.310919	FALSE	12114.5	-0.183902	0.850511	FALSE	406.593	-0.436088	0.459399	FALSE	966.54	0.295327	0.109452	FALSE	34.1164	0.371858	0.591768	FALSE	15.1553	0.692352	NA	FALSE	307.021	-0.0250158	0.999947	FALSE	1705.52	-0.0391326	0.999981	FALSE	29.7175	0.164921	0.999877	FALSE	13.0332	0.123549	NA	FALSE
ENSG00000049167	ERCC8	chr5:60169657-60240900	chr5:60238400-60243400	862.158	-0.492398	0.00684323	FALSE	978.856	0.183834	0.201385	FALSE	1106.86	0.0224504	0.977388	FALSE	105.196	0.459975	0.522244	FALSE	1436.93	0.0297281	0.857721	FALSE	9.73098	0.320132	NA	FALSE	122.775	-0.119277	0.834298	FALSE	126.579	0.122351	0.999947	FALSE	2224.62	-0.0212068	0.999981	FALSE	11.0907	0.16252	NA	FALSE	133.288	0.037524	0.994787	FALSE
ENSG00000049192	ADAMTS6	chr5:64444562-64777747	chr5:64775247-64780247	1026.24	2.25798	1.38019e-11	TRUE	1797.04	-0.796364	0.145089	FALSE	3445.3	-0.031407	0.97968	FALSE	827.562	-0.51565	0.432324	FALSE	4903.69	0.605149	0.000331857	TRUE	6.62549	-0.198749	NA	FALSE	375.143	-0.184311	0.776837	FALSE	741.695	0.23565	0.999947	FALSE	11435.5	0.013367	0.999981	FALSE	12.432	-0.131597	NA	FALSE	411.082	-0.169208	0.977409	FALSE
ENSG00000049239	H6PD	chr1:9294833-9331396	chr1:9292333-9297333	10124.9	0.715144	0.0192064	FALSE	5324.52	0.0367565	0.902842	FALSE	10944.5	-0.537578	0.274906	FALSE	70.1067	0.23794	0.759927	FALSE	1085.55	0.0456842	0.832352	FALSE	11.1873	0.619668	NA	FALSE	250.785	-0.130341	0.836244	FALSE	78.7458	-0.0325885	0.999947	FALSE	1492.48	-0.286671	0.999981	FALSE	11.7324	-0.359335	NA	FALSE	595.37	0.0158478	0.997619	FALSE
ENSG00000049245	VAMP3	chr1:7831328-7841492	chr1:7828828-7833828	8334.46	-0.328025	0.303692	FALSE	5636.72	-0.0187741	0.916743	FALSE	15805	0.391395	0.26139	FALSE	17.939	0.338259	0.706187	FALSE	407.868	0.21661	0.209153	FALSE	28.9869	1.0303	0.0913659	FALSE	208.214	-0.380425	0.337429	FALSE	21.117	0.359692	0.999947	FALSE	623.584	-0.0725822	0.999981	FALSE	20.1996	0.103813	NA	FALSE	362.545	0.114589	0.986935	FALSE
ENSG00000049246	PER3	chr1:7844379-7905237	chr1:7841879-7846879	1592.18	0.559793	0.0956728	FALSE	1030.58	0.119918	0.647374	FALSE	3567.12	-0.0903683	0.945903	FALSE	97.6614	0.505546	0.480534	FALSE	2067.66	0.234021	0.138954	FALSE	8.08354	0.429021	NA	FALSE	229.169	-0.302474	0.520813	FALSE	112.465	0.251102	0.999947	FALSE	3378.58	-0.0625874	0.999981	FALSE	16.6256	-0.45066	NA	FALSE	435.988	0.342404	0.891495	FALSE
ENSG00000049247	UTS2	chr1:7903142-7913572	chr1:7911072-7916072	242.18	0.557399	0.206923	FALSE	103.848	0.134667	0.744553	FALSE	432.534	-0.00939446	0.994858	FALSE	41.956	0.0202694	0.983036	FALSE	206.662	0.0805916	0.766586	FALSE	35.1521	0.16696	0.83727	FALSE	18.5173	0.584877	0.352755	FALSE	30.7851	0.0611413	0.999947	FALSE	385.068	0.0238376	0.999981	FALSE	19.1626	0.213118	NA	FALSE	8.77725	0.0714274	NA	FALSE
ENSG00000049249	TNFRSF9	chr1:7979906-8000926	chr1:7998426-8003426	117.636	1.30145	3.85987e-05	TRUE	547.811	-1.0944	0.0221256	TRUE	308.29	-0.897058	0.564427	FALSE	174.897	0.0668126	0.931515	FALSE	193.929	-0.000906167	0.99853	FALSE	27.2608	-0.230687	0.781632	FALSE	79.5823	0.0777424	0.913306	FALSE	55.4627	0.0195946	0.999947	FALSE	616.003	-0.176969	0.999981	FALSE	14.6849	0.0239915	NA	FALSE	133.582	0.0562476	0.990135	FALSE
ENSG00000049283	EPN3	chr17:48609903-48621111	chr17:48607403-48612403	135.239	0.627479	0.156065	FALSE	182.051	0.124153	0.866811	FALSE	62.6659	0.195837	0.783004	FALSE	72.941	0.484337	0.46451	FALSE	176.399	0.197884	0.392061	FALSE	142.279	0.751148	0.053434	FALSE	29.8398	0.374702	0.568581	FALSE	84.4357	-0.23839	0.999947	FALSE	320.062	0.0570498	0.999981	FALSE	101.207	-0.0946062	0.999877	FALSE	18.3556	-0.0713801	0.987606	FALSE
ENSG00000049319	SRD5A2	chr2:31747549-31806136	chr2:31803636-31808636	9.22651	1.42376	0.101703	FALSE	17.7402	-1.67792	2.82525e-06	FALSE	19.5175	-0.0655351	0.976988	FALSE	1997.19	-0.216574	0.641941	FALSE	119.516	0.0946638	0.779602	FALSE	607.14	-0.00895749	0.988224	FALSE	16.6255	0.285082	NA	FALSE	597.633	-0.17209	0.999947	FALSE	350.899	-0.129303	0.999981	FALSE	246.091	-0.248874	0.999877	FALSE	5.63385	0.0207936	NA	FALSE
ENSG00000049323	LTBP1	chr2:33172038-33624576	chr2:33169538-33174538	7407.02	-0.284224	0.70316	FALSE	2220.96	0.275986	0.80972	FALSE	3188.42	0.342764	0.849325	FALSE	2243.63	0.882196	0.0387759	FALSE	6273.81	-0.123691	0.478673	FALSE	43.4781	1.49194	0.0113151	TRUE	116.782	-0.655146	0.15773	FALSE	2130.5	-0.250394	0.999947	FALSE	8664.22	0.265488	0.999981	FALSE	70.7281	-1.35993	0.0470885	TRUE	136.547	0.915256	0.0745709	FALSE
ENSG00000049449	RCN1	chr11:31833938-32127301	chr11:31831438-31836438	28958.1	-0.354164	0.170824	FALSE	42673.1	-0.13429	0.63151	FALSE	20525.2	-0.440769	0.0873544	FALSE	5200.44	1.03611	0.00248604	TRUE	2786.56	-0.272769	0.0340492	FALSE	135.448	0.385662	0.458655	FALSE	43.151	-0.630486	0.283553	FALSE	2220.31	0.114554	0.999947	FALSE	5121.22	-0.0983708	0.999981	FALSE	157.785	-0.250386	0.999877	FALSE	207.728	0.419565	0.83167	FALSE
ENSG00000049540	ELN	chr7:73442118-73484237	chr7:73439618-73444618	25.8405	1.15529	0.0113259	FALSE	34.4409	-0.27526	0.560629	FALSE	28.3717	0.413996	0.815257	FALSE	794.053	0.145297	0.782129	FALSE	268.004	-0.446558	0.0703281	FALSE	119.452	0.0260895	0.970204	FALSE	23.5938	0.0520687	0.950995	FALSE	383.475	0.0131709	0.999947	FALSE	438.336	0.0251187	0.999981	FALSE	70.4968	-0.175382	0.999877	FALSE	5.83837	0.195731	NA	FALSE
ENSG00000049541	RFC2	chr7:73645828-73668774	chr7:73666274-73671274	2377.16	0.0747941	0.895583	FALSE	2398.42	0.296141	0.172568	FALSE	3294.82	0.224767	0.599962	FALSE	20.9837	0.850506	0.358742	FALSE	840.804	0.318968	0.0163202	FALSE	7.3225	0.558061	NA	FALSE	425.245	-0.117244	0.82665	FALSE	30.9292	-0.0780291	0.999947	FALSE	1113.24	0.0498915	0.999981	FALSE	9.87694	-0.323529	NA	FALSE	487.647	0.210076	0.973204	FALSE
ENSG00000049618	ARID1B	chr6:157099062-157531913	chr6:157096562-157101562	3711.15	0.0713225	0.843456	FALSE	2594.11	-0.123235	0.306711	FALSE	10412.9	-0.30028	0.275552	FALSE	645.804	0.531768	0.450427	FALSE	10001.2	0.0667975	0.594391	FALSE	6.91385	0.289663	NA	FALSE	992.787	-0.95806	0.0109796	FALSE	861.967	0.09928	0.999947	FALSE	15860.8	-0.0381146	0.999981	FALSE	23.7228	-0.603363	0.894879	FALSE	1734.1	0.117019	0.986935	FALSE
ENSG00000049656	CLPTM1L	chr5:1317858-1345214	chr5:1342714-1347714	12687.4	-0.351211	0.147142	FALSE	13066.4	0.45693	1.48013e-09	FALSE	15284.8	-0.183894	0.731406	FALSE	39.196	0.599447	0.458418	FALSE	1188.21	0.0436158	0.783925	FALSE	8.23092	0.143353	NA	FALSE	227.859	-0.437145	0.335178	FALSE	55.2822	-0.0397693	0.999947	FALSE	1541.72	0.018899	0.999981	FALSE	18.7706	-0.129804	NA	FALSE	394.698	0.142976	0.983306	FALSE
ENSG00000049759	NEDD4L	chr18:55711598-56068772	chr18:55709098-55714098	9448.85	0.337335	0.0825365	FALSE	9636.19	-0.903824	2.02887e-05	FALSE	27272.4	0.536503	0.270726	FALSE	725.396	0.910591	0.118977	FALSE	9441	0.249857	0.0804601	FALSE	9.30596	0.594753	NA	FALSE	281.548	-0.945292	0.00205728	FALSE	797.235	0.164585	0.999947	FALSE	18305.6	-0.24122	0.999981	FALSE	16.8875	-0.319791	NA	FALSE	579.471	0.519309	0.452603	FALSE
ENSG00000049768	FOXP3	chrX:49106896-49121288	chrX:49118788-49123788	50.7873	0.0887753	0.807371	FALSE	39.3591	0.425916	0.142854	FALSE	40.5208	0.318213	0.719533	FALSE	111.191	-0.48482	0.451108	FALSE	106.947	-0.065402	0.837675	FALSE	63.7683	-0.695323	0.213972	FALSE	7.95385	0.360651	NA	FALSE	75.3369	0.163483	0.999947	FALSE	123.969	-0.0854041	0.999981	FALSE	47.8988	0.24031	0.999877	FALSE	2.58394	-0.00261579	NA	FALSE
ENSG00000049769	PPP1R3F	chrX:49126305-49157929	chrX:49123805-49128805	503.868	-0.0123895	0.981605	FALSE	845.773	0.315918	0.0334982	FALSE	315.681	-0.11464	0.929502	FALSE	408.377	0.427366	0.44293	FALSE	288.007	0.138631	0.538655	FALSE	4.35765	0.135789	NA	FALSE	330.057	-0.256623	0.614419	FALSE	128.218	0.00935204	0.999947	FALSE	406.394	-0.0812643	0.999981	FALSE	11.1958	-0.0920742	NA	FALSE	441.568	0.188754	0.977023	FALSE
ENSG00000049860	HEXB	chr5:73935847-74018472	chr5:73933347-73938347	19116.3	-0.44823	0.156326	FALSE	22075	-0.241419	2.75813e-05	FALSE	23744.2	-0.451615	0.0596194	FALSE	408.439	0.739145	0.0551647	FALSE	1530.6	0.0829327	0.585145	FALSE	11.0779	0.355039	NA	FALSE	544.321	-0.536586	0.249196	FALSE	231.501	0.0261805	0.999947	FALSE	3016.54	-0.0249844	0.999981	FALSE	20.7361	-0.067205	NA	FALSE	702.341	0.00044724	0.999773	FALSE
ENSG00000049883	PTCD2	chr5:71616193-71656052	chr5:71613693-71618693	732.594	0.259812	0.16146	FALSE	764.784	0.149107	0.419915	FALSE	1049.9	0.185719	0.474353	FALSE	57.1297	0.495181	0.534034	FALSE	1302.13	0.364629	0.00346168	FALSE	6.54949	0.171799	NA	FALSE	111.593	-0.241449	0.603551	FALSE	72.5875	0.104219	0.999947	FALSE	1996.78	-0.0487082	0.999981	FALSE	9.53777	0.275829	NA	FALSE	114.457	0.245549	0.97614	FALSE
ENSG00000050030	KIAA2022	chrX:73952683-74145282	chrX:74142782-74147782	32.2548	-1.13688	0.473239	FALSE	2.25107	-2.43292	0.310919	FALSE	3.65075	1.3939	NA	FALSE	756.995	-1.72369	4.63977e-08	TRUE	59.2138	0.108161	0.770524	FALSE	45.1464	-0.291005	0.65372	FALSE	12.7933	-0.828502	NA	FALSE	270.673	-0.271939	0.999947	FALSE	157.233	0.238921	0.999981	FALSE	79.5795	-0.822325	0.620504	FALSE	3.18434	0.0238147	NA	FALSE
ENSG00000050130	JKAMP	chr14:59951160-59972128	chr14:59948660-59953660	5666.76	-0.61044	0.0247999	FALSE	4084.52	0.0423928	0.850175	FALSE	7278.11	0.0460992	0.936761	FALSE	29.4826	0.537982	0.521047	FALSE	797.791	0.0395023	0.828398	FALSE	7.70785	0.510129	NA	FALSE	675.128	-0.693093	0.0925013	FALSE	40.3791	0.0182399	0.999947	FALSE	1272.04	-0.111978	0.999981	FALSE	19.2185	-0.370947	NA	FALSE	732.727	-0.0723969	0.986935	FALSE
ENSG00000050165	DKK3	chr11:11984652-12031316	chr11:12028816-12033816	9782.89	3.36351	0.00012062	TRUE	12589.5	-0.537236	0.064928	FALSE	144.163	0.118172	0.93245	FALSE	114.434	-0.0389807	0.96136	FALSE	1128.84	0.760937	0.000427503	TRUE	71.3824	-0.511117	0.344745	FALSE	87.3882	0.91997	0.0984259	FALSE	138.674	0.0653935	0.999947	FALSE	1812.68	-0.112518	0.999981	FALSE	50.8696	0.350835	0.999877	FALSE	109.18	-0.119751	0.986935	FALSE
ENSG00000050327	ARHGEF5	chr7:144052380-144077725	chr7:144049880-144054880	958.804	-1.55728	0.00215025	TRUE	800.783	-1.1528	2.57232e-15	TRUE	1695.65	0.225491	0.715767	FALSE	16.5654	2.15656	0.000998437	FALSE	105.891	-0.562389	0.0591134	FALSE	0.951439	0.383758	NA	FALSE	14.0966	-0.0190582	NA	FALSE	4.068	0.0430786	NA	FALSE	200.667	-0.41303	0.999981	FALSE	1.12088	-0.200606	NA	FALSE	8.90382	-0.386804	NA	FALSE
ENSG00000050344	NFE2L3	chr7:26191859-26226745	chr7:26189359-26194359	405.515	0.619879	0.030849	FALSE	797.856	1.96239	9.00969e-06	TRUE	299.929	0.567872	0.539543	FALSE	404.451	0.931837	0.0756137	FALSE	271.165	0.0124648	0.970649	FALSE	103.005	0.348626	0.561773	FALSE	23.6605	0.46336	0.482203	FALSE	122.965	0.585357	0.999947	FALSE	1268.42	0.800747	0.0854183	FALSE	55.9811	0.585766	0.963343	FALSE	72.3126	0.994525	0.0676793	FALSE
ENSG00000050393	MCUR1	chr6:13786788-13814800	chr6:13812300-13817300	2409.54	-0.370481	0.104934	FALSE	2496.32	-0.095054	0.695583	FALSE	4121.16	-0.198727	0.701317	FALSE	32.8097	0.409211	0.652521	FALSE	826.768	0.12104	0.498744	FALSE	12.6134	0.763767	NA	FALSE	270.863	-0.323015	0.438595	FALSE	56.406	-0.0967505	0.999947	FALSE	1390.76	-0.10328	0.999981	FALSE	21.0829	-0.050941	NA	FALSE	510.063	0.299171	0.92023	FALSE
ENSG00000050405	LIMA1	chr12:50569570-50677329	chr12:50674829-50679829	25776.2	-0.285119	0.315596	FALSE	24446.6	-0.0414482	0.850758	FALSE	29144.7	-0.177961	0.765098	FALSE	197.931	0.833337	0.200588	FALSE	2451.38	0.211351	0.075187	FALSE	28.3236	1.4488	0.0114758	TRUE	86.175	-0.126021	0.834006	FALSE	219.599	0.0469557	0.999947	FALSE	4846.92	-0.119117	0.999981	FALSE	16.4791	0.166505	NA	FALSE	112.113	-0.0546841	0.99047	FALSE
ENSG00000050426	LETMD1	chr12:51441744-51454207	chr12:51439244-51444244	1829.48	0.523095	0.000566663	FALSE	1742.47	0.121097	0.68375	FALSE	1970	0.299488	0.415024	FALSE	13.0269	1.07111	0.222789	FALSE	440.825	0.325872	0.04444	FALSE	9.24416	0.478095	NA	FALSE	153.498	-0.222926	0.680663	FALSE	19.2627	0.176704	0.999947	FALSE	648.739	-0.0902268	0.999981	FALSE	11.4056	0.00251156	NA	FALSE	214.033	0.0604623	0.988563	FALSE
ENSG00000050438	SLC4A8	chr12:51785100-51902980	chr12:51782600-51787600	507.566	-0.646282	0.0811427	FALSE	884.476	0.465799	0.00086296	FALSE	463.858	-0.777951	0.18365	FALSE	1561.86	0.917001	0.0179799	FALSE	1401.25	-0.0442278	0.803868	FALSE	14.0493	-0.172394	NA	FALSE	84.8606	1.55087	8.7989e-06	TRUE	364.475	0.0443935	0.999947	FALSE	2395.88	0.0336076	0.999981	FALSE	13.8425	0.182547	NA	FALSE	48.6353	0.470312	0.81923	FALSE
ENSG00000050555	LAMC3	chr9:133884468-133969860	chr9:133881968-133886968	68.9671	1.73024	0.0113336	TRUE	25.4226	-0.385267	0.719981	FALSE	34.3316	0.288819	0.937061	FALSE	3303.27	0.654273	0.119847	FALSE	414.857	-0.711343	0.00232991	TRUE	191.233	0.529696	0.209856	FALSE	31.139	-0.134495	0.84981	FALSE	1981.47	-0.270229	0.999947	FALSE	745.371	0.192359	0.999981	FALSE	177.916	-0.861386	0.526724	FALSE	37.9115	0.873837	0.15799	FALSE
ENSG00000050628	PTGER3	chr1:71318035-71513491	chr1:71510991-71515991	11.9322	-0.0787352	0.950295	FALSE	123.17	-0.417533	0.808599	FALSE	85.6876	2.05567	0.321106	FALSE	6160.94	-0.814258	0.148839	FALSE	704.991	0.0799794	0.839953	FALSE	302.663	-0.242367	0.714293	FALSE	18.7179	0.186622	0.811361	FALSE	1446.35	-0.188636	0.999947	FALSE	2113.84	0.171673	0.999981	FALSE	150.809	-0.665023	0.861901	FALSE	20.0187	0.166687	0.983767	FALSE
ENSG00000050730	TNIP3	chr4:122052562-122148621	chr4:122146121-122151121	72.8557	-2.06434	9.9163e-15	TRUE	103.802	0.478718	0.575665	FALSE	44.8673	-0.64392	0.80737	FALSE	408.818	0.397137	0.458481	FALSE	1058.74	0.0276444	0.896994	FALSE	20.6485	0.226605	0.791984	FALSE	23.2013	0.945334	0.0767435	FALSE	418.568	-0.26912	0.999947	FALSE	1914.61	0.188148	0.999981	FALSE	23.8323	-0.451632	0.999877	FALSE	19.7374	-0.0279293	0.996074	FALSE
ENSG00000050748	MAPK9	chr5:179660142-179719099	chr5:179716599-179721599	2508.88	-0.895125	1.05593e-06	FALSE	2565.89	-0.0393631	0.925612	FALSE	4457.46	0.0711044	0.86761	FALSE	135.659	0.992253	0.0866069	FALSE	1634.89	-0.0264861	0.889143	FALSE	11.2955	-0.0502798	NA	FALSE	166.865	-0.462114	0.314678	FALSE	124.274	0.168033	0.999947	FALSE	1917.88	-0.104336	0.999981	FALSE	20.9201	-0.0653981	NA	FALSE	323.79	0.261948	0.957789	FALSE
ENSG00000050767	COL23A1	chr5:177664618-178017556	chr5:178015056-178020056	4.60716	-0.81931	0.507367	FALSE	64.2255	-0.840131	0.418244	FALSE	35.3987	0.0791984	0.982647	FALSE	22179.1	0.644729	0.0748856	FALSE	1410.6	-0.501032	0.0127068	FALSE	62.7253	2.27851	5.35484e-06	TRUE	14.849	-0.182174	NA	FALSE	8745.22	-0.31207	0.999947	FALSE	3953.22	-0.010766	0.999981	FALSE	49.5513	0.887472	0.527569	FALSE	11.4378	0.279896	NA	FALSE
ENSG00000050820	BCAR1	chr16:75262927-75301951	chr16:75299451-75304451	9935.94	-0.426707	0.00438525	FALSE	8739.66	-0.36291	0.000273303	FALSE	16347.3	-0.0095081	0.988943	FALSE	49.3316	0.505476	0.568622	FALSE	1554.38	0.268343	0.119023	FALSE	5.61658	0.63061	NA	FALSE	359.42	-0.443835	0.282667	FALSE	100.794	-0.341186	0.999947	FALSE	2646.74	-0.0194257	0.999981	FALSE	16.0981	-0.395585	NA	FALSE	542.365	0.060358	0.987606	FALSE
ENSG00000051009	FAM160A2	chr11:6232564-6255941	chr11:6253441-6258441	1302.1	0.273643	0.1563	FALSE	1036.26	-0.0543704	0.784898	FALSE	1691.53	0.221959	0.165661	FALSE	36.1405	0.237809	0.781471	FALSE	797.636	0.0691133	0.699169	FALSE	27.9745	0.970487	0.118669	FALSE	156.149	0.285413	0.552413	FALSE	46.9726	-0.044197	0.999947	FALSE	968.629	-0.2137	0.999981	FALSE	19.5911	0.025118	NA	FALSE	135.416	-0.0333177	0.995382	FALSE
ENSG00000051108	HERPUD1	chr16:56965959-56977798	chr16:56963459-56968459	5563.2	-0.214746	0.718003	FALSE	3731.39	-0.308004	0.00421938	FALSE	3948.97	-0.251833	0.264682	FALSE	12.2561	0.518206	0.596315	FALSE	516.207	0.243301	0.133438	FALSE	6.52328	0.740132	NA	FALSE	537.529	-0.451505	0.267532	FALSE	26.5444	0.056914	0.999947	FALSE	941.667	-0.155661	0.999981	FALSE	12.6726	-0.402675	NA	FALSE	572.488	0.207203	0.974704	FALSE
ENSG00000051128	HOMER3	chr19:19040009-19052070	chr19:19049570-19054570	4388.7	-0.00476285	0.991262	FALSE	7079.54	-0.245304	5.00961e-07	FALSE	4383.33	0.277455	0.735838	FALSE	12.7048	0.716613	0.45497	FALSE	452.321	0.199875	0.220786	FALSE	8.03404	0.104426	NA	FALSE	236.422	-0.35737	0.35363	FALSE	24.4696	-0.244413	0.999947	FALSE	749.926	0.0439606	0.999981	FALSE	16.2239	-0.516768	NA	FALSE	483.534	0.0177634	0.997063	FALSE
ENSG00000051180	RAD51	chr15:40986971-41024354	chr15:40984471-40989471	755.896	-0.782131	0.0646576	FALSE	1032.91	0.164716	0.6894	FALSE	1062.6	-0.256707	0.37051	FALSE	40.7268	0.438524	0.613347	FALSE	1080.68	0.30789	0.0358811	FALSE	5.02264	0.725483	NA	FALSE	277.352	-0.332966	0.452721	FALSE	50.7108	0.0282753	0.999947	FALSE	1501.68	0.124375	0.999981	FALSE	12.1074	-0.0794707	NA	FALSE	410.924	0.307258	0.907031	FALSE
ENSG00000051341	POLQ	chr3:121150277-121264853	chr3:121262353-121267353	1984.68	-0.063977	0.926342	FALSE	2841.5	0.115428	0.686461	FALSE	3336.05	-0.0594328	0.92743	FALSE	132.642	0.493259	0.525127	FALSE	2992.61	0.286857	0.0542766	FALSE	6.31912	0.356323	NA	FALSE	108.015	-0.271966	0.588166	FALSE	140.637	0.188848	0.999947	FALSE	4035.21	0.118604	0.999981	FALSE	7.82405	-0.206765	NA	FALSE	143.834	0.0567657	0.990135	FALSE
ENSG00000051382	PIK3CB	chr3:138372859-138553780	chr3:138551280-138556280	875.781	-0.0735409	0.890137	FALSE	896.476	-0.0747064	0.772066	FALSE	3676.04	-0.0349593	0.95867	FALSE	226.08	0.594074	0.403398	FALSE	4111.47	0.103299	0.438076	FALSE	7.08953	0.235809	NA	FALSE	281.802	-0.535484	0.15166	FALSE	301.973	0.170555	0.999947	FALSE	6536.55	-0.0610858	0.999981	FALSE	13.5749	-0.00376209	NA	FALSE	424.474	0.283207	0.933857	FALSE
ENSG00000051523	CYBA	chr16:88709690-88717560	chr16:88715060-88720060	158.049	-1.60816	0.354461	FALSE	888.024	4.79169	7.62452e-06	TRUE	10.7262	-0.984803	0.608457	FALSE	142.23	0.966329	0.0323813	FALSE	71.3555	-0.61866	0.0409656	TRUE	13.8329	0.544256	NA	FALSE	18.4724	-0.11893	0.880823	FALSE	43.0845	0.0817439	0.999947	FALSE	186.037	0.476432	0.950213	FALSE	12.4682	0.0615602	NA	FALSE	40.7776	1.19088	0.00299424	TRUE
ENSG00000051596	THOC3	chr5:175344875-175461683	chr5:175459183-175464183	2686.49	-0.368341	0.466841	FALSE	4735.94	-0.171405	0.190064	FALSE	5961.73	0.121522	0.799346	FALSE	216.516	0.0535158	0.931863	FALSE	194.207	0.0872712	0.733108	FALSE	34.4197	-0.166047	0.827663	FALSE	8.04531	0.20368	NA	FALSE	92.4472	-0.0904381	0.999947	FALSE	400.312	-0.142808	0.999981	FALSE	15.3331	-0.145634	NA	FALSE	0.962155	0.0312876	NA	FALSE
ENSG00000051620	HEBP2	chr6:138724667-138743334	chr6:138722167-138727167	3787.57	-0.481176	0.0788002	FALSE	3010.75	0.09316	0.547061	FALSE	3146.37	-0.0301313	0.971018	FALSE	29.4653	0.235555	0.782303	FALSE	616.243	0.208847	0.157529	FALSE	23.4904	1.13098	0.0634994	FALSE	304.387	-0.0475196	0.928452	FALSE	42.0186	-0.159243	0.999947	FALSE	806.132	-0.227216	0.999981	FALSE	29.1627	-0.256697	0.999877	FALSE	343.801	0.0416472	0.993024	FALSE
ENSG00000051825	MPHOSPH9	chr12:123636866-123728561	chr12:123726061-123731061	3151.9	-0.213175	0.505904	FALSE	2469.2	0.217037	0.00934093	FALSE	3807.97	-0.13793	0.642034	FALSE	106.899	0.523783	0.51056	FALSE	3014.42	0.250532	0.0196238	FALSE	5.55939	-0.0655586	NA	FALSE	25.3825	0.0930233	0.89852	FALSE	127.533	0.19617	0.999947	FALSE	4079.66	-0.00104336	0.999981	FALSE	6.99558	0.160173	NA	FALSE	11.4602	0.28166	NA	FALSE
ENSG00000052126	PLEKHA5	chr12:19282647-19529334	chr12:19280147-19285147	3614.05	0.282177	0.412249	FALSE	4010.17	-0.174056	0.500142	FALSE	4511.35	-0.573074	0.0611377	FALSE	374.825	0.469511	0.521458	FALSE	5606.9	0.244587	0.105699	FALSE	12.6937	0.375468	NA	FALSE	215.011	0.156304	0.740179	FALSE	717.992	0.547017	0.999947	FALSE	14395.2	0.390506	0.999981	FALSE	19.2759	0.234229	NA	FALSE	539.906	0.577492	0.382397	FALSE
ENSG00000052344	PRSS8	chr16:31142755-31147083	chr16:31144583-31149583	16.94	-0.0163608	0.987069	FALSE	12.6189	-0.595644	0.429176	FALSE	604.848	0.531781	0.91849	FALSE	15.0714	0.740818	0.405004	FALSE	90.3935	0.0107557	0.977504	FALSE	19.9822	1.15937	0.068359	FALSE	24.9191	0.00482469	0.995397	FALSE	10.2034	-0.0507583	NA	FALSE	153.685	-0.148899	0.999981	FALSE	10.5975	0.0989864	NA	FALSE	27.6896	-0.133105	0.986935	FALSE
ENSG00000052723	SIKE1	chr1:115312099-115323306	chr1:115320806-115325806	5235.04	-0.408888	0.0305359	FALSE	3456.62	0.136764	0.143903	FALSE	5569.12	-0.16122	0.694898	FALSE	13.231	0.388451	0.688816	FALSE	403.243	0.166769	0.394942	FALSE	141.168	0.331923	0.516061	FALSE	169.035	-0.225373	0.62578	FALSE	21.396	-0.0439097	0.999947	FALSE	633.481	-0.0997872	0.999981	FALSE	39.539	0.0844256	0.999877	FALSE	182.542	0.0856244	0.986935	FALSE
ENSG00000052749	RRP12	chr10:99116114-99161127	chr10:99158627-99163627	7201.92	0.931173	0.00691474	FALSE	4720.2	0.475887	0.0494063	FALSE	10152.7	0.112091	0.929669	FALSE	48.3854	0.494377	0.57134	FALSE	1910.58	0.169108	0.255426	FALSE	10.0077	0.421524	NA	FALSE	533.266	0.229937	0.641684	FALSE	59.9906	-0.15538	0.999947	FALSE	2250.34	0.00268978	0.999981	FALSE	11.9015	0.109316	NA	FALSE	425.301	-0.0660391	0.987606	FALSE
ENSG00000052795	FNIP2	chr4:159690289-159829201	chr4:159687789-159692789	4864.05	-0.843287	0.162874	FALSE	6198.8	-0.73817	0.00062911	FALSE	10824.1	-0.348993	0.105462	FALSE	211.266	0.412488	0.586792	FALSE	3778.36	-0.0719555	0.696248	FALSE	12.0004	0.798282	NA	FALSE	226.747	-0.596099	0.26803	FALSE	270.305	0.126333	0.999947	FALSE	7775.07	-0.303559	0.999981	FALSE	23.873	-0.0825411	0.999877	FALSE	568.491	0.0802639	0.986935	FALSE
ENSG00000052802	MSMO1	chr4:166248774-166264312	chr4:166246274-166251274	12380.2	-0.212881	0.593777	FALSE	14859.1	-0.163555	0.798384	FALSE	32372.4	-0.159075	0.728421	FALSE	18.1336	0.887459	0.302193	FALSE	568.271	0.135093	0.485483	FALSE	4.27205	0.920122	NA	FALSE	295.769	0.0556974	0.938106	FALSE	35.8437	0.327765	0.999947	FALSE	1295.45	0.0424059	0.999981	FALSE	11.3241	-0.0131905	NA	FALSE	386.151	-0.138034	0.986171	FALSE
ENSG00000052841	TTC17	chr11:43380481-43516483	chr11:43377981-43382981	8472.32	0.171191	0.545619	FALSE	4656.67	0.0238604	0.886648	FALSE	5825.21	-0.207505	0.633776	FALSE	196.403	0.591541	0.436243	FALSE	4521.14	0.171771	0.129574	FALSE	8.81958	0.195135	NA	FALSE	245.976	-0.321242	0.439459	FALSE	219.665	0.150741	0.999947	FALSE	6259.85	-0.00464472	0.999981	FALSE	13.7908	-0.0664635	NA	FALSE	274.708	0.22287	0.974116	FALSE
ENSG00000052850	ALX4	chr11:44281993-44331716	chr11:44329216-44334216	8.27691	0.216538	0.84409	FALSE	9.14898	-0.50419	0.629357	FALSE	16.8868	0.00808296	0.99841	FALSE	1533.57	0.905951	0.00976065	FALSE	380.626	-0.63057	0.00017482	TRUE	715.417	0.352155	0.427519	FALSE	15.3253	0.0226929	NA	FALSE	911.848	0.0850201	0.999947	FALSE	598.097	-0.292394	0.999981	FALSE	468.704	-0.295034	0.999877	FALSE	8.47617	0.164387	NA	FALSE
ENSG00000053108	FSTL4	chr5:132532146-132948255	chr5:132945755-132950755	13.1169	2.26439	0.0195409	FALSE	3.82357	-1.1464	0.41934	FALSE	50.8702	0.0909695	0.97417	FALSE	27033.5	0.348883	0.483904	FALSE	1477.4	-0.53051	0.0205218	FALSE	619.053	0.266373	0.543942	FALSE	12.1993	-0.0567401	NA	FALSE	10719.9	-0.0226395	0.999947	FALSE	3493.95	-0.218306	0.999981	FALSE	515.051	-0.425867	0.999877	FALSE	11.8294	-0.0259549	NA	FALSE
ENSG00000053254	FOXN3	chr14:89591214-90085493	chr14:90082993-90087993	6718.31	-1.12173	0.000164269	TRUE	5285.49	-0.0306193	0.874052	FALSE	19325.2	-0.937474	0.00134935	FALSE	1209.08	0.871004	0.0796396	FALSE	9292.65	-0.339456	0.0337274	FALSE	14.8072	0.409276	0.636001	FALSE	325.038	-0.763156	0.130192	FALSE	1054.56	0.111078	0.999947	FALSE	15486.7	-0.156511	0.999981	FALSE	19.9346	-0.321882	NA	FALSE	433.133	0.0332413	0.994747	FALSE
ENSG00000053328	METTL24	chr6:110567130-110679475	chr6:110676975-110681975	5.16725	-0.0439565	0.97609	FALSE	7.4082	0.010236	0.99537	FALSE	2.36252	-0.816917	NA	FALSE	4602.65	0.594083	0.183749	FALSE	585.832	-0.537805	0.00775932	FALSE	488.776	0.797623	0.0153964	FALSE	11.6663	-0.0470691	NA	FALSE	2109.88	0.0676645	0.999947	FALSE	1130.44	-0.0168014	0.999981	FALSE	401.137	-0.339989	0.999877	FALSE	9.38965	0.031916	NA	FALSE
ENSG00000053371	AKR7A2	chr1:19630458-19638640	chr1:19636140-19641140	2690.38	-0.0509054	0.88294	FALSE	2676.05	0.0773656	0.367702	FALSE	1766.4	0.180931	0.62978	FALSE	11.2817	0.415011	0.6739	FALSE	255.714	0.103861	0.671021	FALSE	8.31202	0.765518	NA	FALSE	311.723	0.0558504	0.919564	FALSE	14.4637	0.129936	0.999947	FALSE	369.243	-0.0163406	0.999981	FALSE	12.398	-0.175947	NA	FALSE	469.772	0.241767	0.958905	FALSE
ENSG00000053372	MRTO4	chr1:19578032-19586622	chr1:19575532-19580532	3725.19	0.171717	0.665314	FALSE	3850.53	0.339556	4.76153e-05	FALSE	3859.73	0.394283	0.20175	FALSE	12.0687	0.210339	0.83791	FALSE	322.148	0.143729	0.471795	FALSE	8.18325	0.154831	NA	FALSE	312.561	-0.0345055	0.944184	FALSE	17.0595	0.254719	0.999947	FALSE	427	0.0556801	0.999981	FALSE	14.2177	0.133693	NA	FALSE	385.692	0.168134	0.977409	FALSE
ENSG00000053438	NNAT	chr20:36149616-36152092	chr20:36147116-36152116	94.1441	-0.345676	0.606835	FALSE	102.205	0.116641	0.72266	FALSE	76.7211	0.537382	0.455519	FALSE	5.71299	0.182464	0.861772	FALSE	95.0483	-0.190242	0.531306	FALSE	8.8935	0.190978	NA	FALSE	22.729	-0.0711776	0.931875	FALSE	5.92154	0.144551	NA	FALSE	137.032	0.255144	0.999981	FALSE	10.8017	0.246959	NA	FALSE	11.7592	0.329612	NA	FALSE
ENSG00000053501	USE1	chr19:17326154-17330638	chr19:17323654-17328654	921.935	0.790464	0.0143732	FALSE	590.253	0.187177	0.440461	FALSE	544.671	0.0664377	0.945951	FALSE	4.42257	0.319255	NA	FALSE	130.708	0.320985	0.213422	FALSE	5.35575	0.424287	NA	FALSE	290.37	-0.121801	0.787923	FALSE	7.8717	-0.0305369	NA	FALSE	180.37	0.0429122	0.999981	FALSE	7.83695	-0.166062	NA	FALSE	223.592	0.0959016	0.986935	FALSE
ENSG00000053524	MCF2L2	chr3:182895830-183146566	chr3:183144066-183149066	505.926	0.569931	0.0240178	FALSE	486.414	0.0493625	0.888529	FALSE	941.749	-0.297294	0.246893	FALSE	3680.17	0.320845	0.505737	FALSE	2292.05	-0.05241	0.745625	FALSE	322.896	0.270519	0.548061	FALSE	28.3622	-0.351445	0.605104	FALSE	2356.28	-0.270566	0.999947	FALSE	4693.67	0.067834	0.999981	FALSE	310.328	-0.83661	0.56581	FALSE	40.3453	0.864006	0.174367	FALSE
ENSG00000053702	NRIP2	chr12:2934513-2944710	chr12:2942210-2947210	96.0448	0.603381	0.0217204	FALSE	73.8515	0.616133	0.143904	FALSE	87.8808	0.0280023	0.989081	FALSE	27.1981	-0.355335	0.656486	FALSE	344.616	0.203776	0.329466	FALSE	24.3911	-0.778265	0.243347	FALSE	19.4124	0.466746	0.490264	FALSE	37.9995	0.303462	0.999947	FALSE	610.19	0.549004	0.713619	FALSE	27.5957	0.282345	0.999877	FALSE	11.2779	0.5441	NA	FALSE
ENSG00000053747	LAMA3	chr18:21269406-21535030	chr18:21266906-21271906	121.724	-0.843282	0.0207741	FALSE	251.614	-1.5668	3.18623e-18	TRUE	563.244	2.03542	0.0585017	FALSE	2293	0.414604	0.362973	FALSE	2736.27	-0.148974	0.271596	FALSE	44.6462	-0.330043	0.615942	FALSE	21.9465	0.897982	0.11825	FALSE	1357.77	0.00655366	0.999947	FALSE	5619	-0.207373	0.999981	FALSE	40.9971	-0.147794	0.999877	FALSE	30.0494	0.320756	0.951685	FALSE
ENSG00000053770	AP5M1	chr14:57735626-57756797	chr14:57733126-57738126	3645.03	-0.403783	0.0306558	FALSE	2792.26	-0.101993	0.322881	FALSE	4939.67	-0.281527	0.140633	FALSE	32.855	0.369251	0.649361	FALSE	672.68	0.172416	0.246744	FALSE	9.27012	0.755559	NA	FALSE	279.317	-0.66359	0.0543047	FALSE	42.7093	0.248417	0.999947	FALSE	1201.8	-0.022261	0.999981	FALSE	15.034	-0.0622238	NA	FALSE	394.387	0.177188	0.977409	FALSE
ENSG00000053900	ANAPC4	chr4:25378834-25420120	chr4:25376334-25381334	2642.85	0.121788	0.412638	FALSE	2265.16	0.218283	0.0101242	FALSE	2001.25	0.102957	0.861368	FALSE	55.1744	0.618916	0.465009	FALSE	1681.65	0.239776	0.0682411	FALSE	14.6585	0.489963	0.583235	FALSE	142.137	-0.292303	0.480167	FALSE	80.1116	0.135427	0.999947	FALSE	2501.16	-0.0825622	0.999981	FALSE	13.5491	-0.0549153	NA	FALSE	193.127	0.266954	0.954228	FALSE
ENSG00000053918	KCNQ1	chr11:2465913-2870339	chr11:2463413-2468413	41.2108	-0.994659	0.246284	FALSE	6.50119	-0.200984	0.837131	FALSE	13.6795	-0.845211	0.727914	FALSE	14738.7	0.750237	0.0713893	FALSE	2967.22	-0.642198	0.0015664	TRUE	363.576	0.41449	0.309873	FALSE	25.1096	-0.717186	0.230151	FALSE	7870.94	0.0250968	0.999947	FALSE	3977.53	0.124325	0.999981	FALSE	306.828	-0.230628	0.999877	FALSE	11.1102	0.437526	NA	FALSE
ENSG00000054116	TRAPPC3	chr1:36602172-36615098	chr1:36612598-36617598	3880.15	-0.460147	0.00560351	FALSE	4507.92	-0.024201	0.871033	FALSE	4155.62	0.0384439	0.962787	FALSE	18.0093	0.424408	0.663812	FALSE	394.709	0.277632	0.106381	FALSE	6.54838	0.672417	NA	FALSE	534.023	-0.529787	0.141214	FALSE	25.6034	0.0444536	0.999947	FALSE	663.357	-0.182718	0.999981	FALSE	16.8428	-0.169961	NA	FALSE	579.491	0.111691	0.986935	FALSE
ENSG00000054118	THRAP3	chr1:36690016-36770958	chr1:36687516-36692516	15371.6	0.0341516	0.897766	FALSE	11321.6	-0.0263701	0.903297	FALSE	19103.2	0.0475394	0.934562	FALSE	96.8156	0.561781	0.513868	FALSE	2865.36	0.265025	0.0199361	FALSE	6.174	0.323626	NA	FALSE	531.827	-0.417159	0.412039	FALSE	141.873	0.201239	0.999947	FALSE	4757.91	-0.138262	0.999981	FALSE	16.757	-0.0574691	NA	FALSE	440.721	0.109603	0.986935	FALSE
ENSG00000054148	PHPT1	chr9:139743175-139745488	chr9:139740675-139745675	5622.16	0.154009	0.738604	FALSE	5697.31	0.0276892	0.827792	FALSE	5233.27	-0.381818	0.563274	FALSE	2.45978	0.643747	NA	FALSE	64.6808	0.157481	0.629855	FALSE	7.62601	0.351166	NA	FALSE	376.038	-0.295125	0.414921	FALSE	10.9382	-0.138526	NA	FALSE	150.838	0.243788	0.999981	FALSE	18.1616	-0.114716	NA	FALSE	600.806	0.190709	0.977023	FALSE
ENSG00000054179	ENTPD2	chr9:139942549-139948497	chr9:139945997-139950997	2.2768	-0.0272198	0.989348	FALSE	3.89403	0.741764	0.528754	FALSE	1.99705	0.552984	NA	FALSE	328.948	0.345115	0.523555	FALSE	23.3017	-0.177631	NA	FALSE	123.93	0.643605	0.17577	FALSE	12.2565	0.195111	NA	FALSE	287.589	0.138998	0.999947	FALSE	36.1478	0.093541	NA	FALSE	171.274	0.597684	0.94264	FALSE	5.92429	0.257463	NA	FALSE
ENSG00000054219	LY75	chr2:160628361-160761260	chr2:160758760-160763760	44.0504	1.25217	0.0153645	FALSE	159.938	0.552309	0.0137441	FALSE	233.021	-0.458102	0.415052	FALSE	3104.99	0.093676	0.863843	FALSE	1039.48	-0.124049	0.491272	FALSE	59.2484	-0.0969045	0.894052	FALSE	33.8188	0.466885	0.427115	FALSE	1851.3	-0.33193	0.999947	FALSE	1965.59	0.360695	0.999981	FALSE	112.737	-0.817375	0.629213	FALSE	19.4849	0.294196	0.958525	FALSE
ENSG00000054267	ARID4B	chr1:235294948-235491534	chr1:235489034-235494034	7338.2	-0.0527298	0.803221	FALSE	5887.63	0.129292	0.647733	FALSE	4144.83	-0.107299	0.717476	FALSE	250.865	0.615711	0.420123	FALSE	5416.42	0.163933	0.114526	FALSE	5.84115	0.925661	NA	FALSE	535.712	-0.267918	0.566946	FALSE	304.72	0.255201	0.999947	FALSE	8206.75	-0.0496026	0.999981	FALSE	12.8831	-0.240027	NA	FALSE	629.815	0.183044	0.977023	FALSE
ENSG00000054277	OPN3	chr1:241753403-241840678	chr1:241838178-241843178	2490.25	-1.60945	4.09331e-14	TRUE	1245.92	1.2984	5.77247e-05	TRUE	1623.68	-0.900413	0.0991656	FALSE	302.677	0.191667	0.748748	FALSE	1494.82	-0.0596825	0.729283	FALSE	44.0683	-0.12564	0.864057	FALSE	14.5327	0.17975	NA	FALSE	241.547	0.172324	0.999947	FALSE	2210.99	0.277131	0.999981	FALSE	27.3011	0.120422	0.999877	FALSE	8.33103	0.171539	NA	FALSE
ENSG00000054282	SDCCAG8	chr1:243419319-243663394	chr1:243416819-243421819	1585.77	0.138686	0.630048	FALSE	1121.19	-0.095876	0.738742	FALSE	1491.5	0.0307269	0.969108	FALSE	455.679	0.0212499	0.978781	FALSE	5431.37	0.111175	0.311816	FALSE	9.35986	0.500787	NA	FALSE	391.022	-0.499352	0.171943	FALSE	375.931	0.279486	0.999947	FALSE	6955.72	-0.0757438	0.999981	FALSE	12.0222	-0.542413	NA	FALSE	436.362	0.360503	0.873131	FALSE
ENSG00000054356	PTPRN	chr2:220154344-220174370	chr2:220171870-220176870	426.114	-0.585002	0.309197	FALSE	72.7578	0.420145	0.739234	FALSE	7320.97	-1.40886	0.0705617	FALSE	778.004	0.513966	0.517732	FALSE	124.001	-0.660356	0.00963169	TRUE	295.539	0.485156	0.323679	FALSE	20.7971	0.244856	0.744526	FALSE	505.173	-0.265367	0.999947	FALSE	245.844	0.200227	0.999981	FALSE	206.427	-0.278451	0.999877	FALSE	27.8996	0.744835	0.231336	FALSE
ENSG00000054392	HHAT	chr1:210501595-210849638	chr1:210499095-210504095	1590.79	-1.06576	7.28515e-07	TRUE	1897.55	0.00185039	0.996306	FALSE	1959.21	-1.23136	5.25709e-10	TRUE	1167.75	0.397866	0.490101	FALSE	4869.15	-0.17568	0.303503	FALSE	16.4927	0.418928	0.623224	FALSE	238.883	-0.0333296	0.945611	FALSE	770.179	0.115647	0.999947	FALSE	8556.14	0.0316496	0.999981	FALSE	14.2466	-0.000273231	NA	FALSE	363.323	0.145021	0.982148	FALSE
ENSG00000054523	KIF1B	chr1:10270862-10441661	chr1:10268362-10273362	6265.56	-0.45718	0.0686931	FALSE	5384.83	-0.080669	0.777759	FALSE	14089.9	-0.122725	0.806114	FALSE	220.782	0.459498	0.538272	FALSE	4715.76	0.00497468	0.972999	FALSE	10.5278	0.11552	NA	FALSE	539.133	-0.453352	0.272483	FALSE	270.917	0.191864	0.999947	FALSE	7180.1	-0.0757208	0.999981	FALSE	12.2404	-0.258994	NA	FALSE	746.329	0.157338	0.977409	FALSE
ENSG00000054598	FOXC1	chr6:1610680-1614127	chr6:1608180-1613180	3861.34	-0.913231	5.71783e-06	FALSE	2377.95	0.308402	0.110014	FALSE	5227.31	-0.06801	0.928116	FALSE	5.72597	0.343347	0.732446	FALSE	96.6054	0.20663	0.499926	FALSE	11.2633	0.404657	NA	FALSE	811.715	-0.998716	0.0129446	FALSE	12.3932	-0.26935	0.999947	FALSE	188.268	0.352905	0.999981	FALSE	24.7794	-0.577909	0.945079	FALSE	1345.57	0.173948	0.977023	FALSE
ENSG00000054611	TBC1D22A	chr22:47158517-47571336	chr22:47156017-47161017	2342.2	-0.0594978	0.864248	FALSE	2529.49	0.0830499	0.658211	FALSE	2381.62	-0.0855581	0.744758	FALSE	629.986	0.312598	0.634891	FALSE	10013.7	0.0243185	0.881669	FALSE	6.31332	0.939158	NA	FALSE	264.133	-0.284553	0.502092	FALSE	640.403	-0.0169918	0.999947	FALSE	11479.7	-0.152211	0.999981	FALSE	8.14076	-0.240005	NA	FALSE	320.689	0.124923	0.986935	FALSE
ENSG00000054654	SYNE2	chr14:64319682-64693165	chr14:64317182-64322182	8439.98	-0.281634	0.678218	FALSE	6599.44	-0.370605	0.37063	FALSE	8389.29	-0.731534	0.426854	FALSE	695.765	0.4656	0.495756	FALSE	7512.78	-0.135954	0.554797	FALSE	45.028	0.689112	0.227793	FALSE	161.154	-0.0634057	0.908132	FALSE	713.042	0.134943	0.999947	FALSE	11994.9	-0.0907361	0.999981	FALSE	30.8941	-0.163453	0.999877	FALSE	378.654	0.350294	0.878547	FALSE
ENSG00000054690	PLEKHH1	chr14:68000017-68056329	chr14:67997517-68002517	822.258	-0.400311	0.294916	FALSE	546.205	0.183538	0.530145	FALSE	1047.2	-0.200433	0.885862	FALSE	154.049	0.54635	0.4088	FALSE	1147.88	-0.371609	0.0511639	FALSE	21.7156	0.444515	0.56662	FALSE	121.203	-0.0974119	0.860274	FALSE	142.346	-0.170553	0.999947	FALSE	1848.79	-0.103008	0.999981	FALSE	19.4525	-0.248009	NA	FALSE	275.704	0.504994	0.583737	FALSE
ENSG00000054793	ATP9A	chr20:50213052-50385173	chr20:50382673-50387673	9455.36	-1.53794	0.0314048	TRUE	8757.99	-0.1313	0.589934	FALSE	12529.9	0.0783284	0.960274	FALSE	750.987	2.05763	1.55475e-06	TRUE	4110.34	-0.548578	0.0689778	FALSE	24.4485	2.63582	1.34984e-05	FALSE	160.541	-1.3313	0.000202592	TRUE	324.516	0.31623	0.999947	FALSE	6225.03	-0.331683	0.999981	FALSE	13.2136	0.118129	NA	FALSE	383.902	-0.0344369	0.994747	FALSE
ENSG00000054796	SPO11	chr20:55904814-55919050	chr20:55902314-55907314	0.19913	1.21323	NA	FALSE	0	NA	NA	FALSE	0.561127	-2.7296	NA	FALSE	2032.76	0.285838	0.550876	FALSE	22.5129	-0.489215	NA	FALSE	805.558	0.345898	0.367058	FALSE	9.0619	-0.276052	NA	FALSE	546.845	0.0536254	0.999947	FALSE	114.91	-0.0928189	0.999981	FALSE	324.121	-0.176211	0.999877	FALSE	7.18574	0.0265264	NA	FALSE
ENSG00000054803	CBLN4	chr20:54572495-54580528	chr20:54578028-54583028	0.62199	-0.24061	NA	FALSE	1.05371	1.32425	NA	FALSE	0	NA	NA	FALSE	109.035	-1.22756	0.0134014	TRUE	3.76516	0.173351	NA	FALSE	108.615	-1.52211	0.000646825	TRUE	12.6184	-0.0355644	NA	FALSE	65.932	-0.822859	0.724107	FALSE	9.68229	-0.0756108	NA	FALSE	62.017	-1.08051	0.254122	FALSE	2.93785	0.00218703	NA	FALSE
ENSG00000054938	CHRDL2	chr11:74407473-74442430	chr11:74439930-74444930	2.60016	-0.64267	0.716726	FALSE	2.05727	-0.677574	0.714624	FALSE	3.53457	0.656331	NA	FALSE	808.409	0.67524	0.0878941	FALSE	311.589	-0.454216	0.0454931	FALSE	505.875	0.464939	0.297341	FALSE	14.447	0.084201	NA	FALSE	407.917	-0.12324	0.999947	FALSE	413.049	-0.143386	0.999981	FALSE	276.241	-0.299462	0.999877	FALSE	9.6238	0.128977	NA	FALSE
ENSG00000054965	FAM168A	chr11:73111531-73309234	chr11:73306734-73311734	4517.66	0.220093	0.32646	FALSE	3039.46	-0.107613	0.528881	FALSE	8804.04	-0.276056	0.258	FALSE	0	NA	NA	FALSE	0	NA	NA	FALSE	8.98705	0.362241	NA	FALSE	146.745	-0.182685	0.707255	FALSE	0	NA	NA	FALSE	0	NA	NA	FALSE	12.6232	-0.1932	NA	FALSE	194.393	0.288267	0.944047	FALSE
ENSG00000054967	RELT	chr11:73087308-73108519	chr11:73084808-73089808	774.151	0.262807	0.46878	FALSE	845.79	0.0679064	0.876872	FALSE	1218.03	0.137909	0.79885	FALSE	26.2639	0.320293	0.730801	FALSE	706.222	0.245167	0.142233	FALSE	7.35426	0.40305	NA	FALSE	305.563	0.40062	0.339789	FALSE	41.1274	-0.0442404	0.999947	FALSE	908.931	0.0348114	0.999981	FALSE	14.2234	-0.140929	NA	FALSE	438.075	0.295953	0.938708	FALSE
ENSG00000054983	GALC	chr14:88304163-88460009	chr14:88457509-88462509	4830.4	-0.985301	0.0196461	FALSE	3492.66	0.119816	0.821085	FALSE	2612.19	-0.74235	0.228567	FALSE	2627.8	-1.33703	3.37442e-05	TRUE	1612.88	0.300376	0.0198746	FALSE	16.4032	1.07396	0.132652	FALSE	467.408	-1.38758	8.28961e-06	TRUE	1149.39	0.0756272	0.999947	FALSE	3029.48	-0.0912106	0.999981	FALSE	16.7351	-0.110518	NA	FALSE	571.679	-0.0666031	0.987606	FALSE
ENSG00000055044	NOP58	chr2:203130438-203168389	chr2:203127938-203132938	5454.15	0.467677	0.196621	FALSE	4246.38	0.253128	0.0219486	FALSE	5714.65	0.134952	0.874813	FALSE	40.3185	0.758897	0.385523	FALSE	1325.2	0.336921	0.0152346	FALSE	5.27127	0.645283	NA	FALSE	344.593	0.081028	0.867242	FALSE	78.5063	-0.0254435	0.999947	FALSE	2449.82	0.0897732	0.999981	FALSE	12.5342	0.00577342	NA	FALSE	379.831	0.210657	0.977023	FALSE
ENSG00000055070	SZRD1	chr1:16679069-16724640	chr1:16676569-16681569	8957.47	-0.256779	0.471047	FALSE	5776.66	-0.188382	0.313039	FALSE	23134.1	0.0471078	0.898112	FALSE	74.4783	0.61867	0.414393	FALSE	938.082	0.304026	0.0255312	FALSE	9.47403	0.735442	NA	FALSE	366.85	-0.892009	0.0261427	FALSE	89.6857	-0.0309801	0.999947	FALSE	1599.69	-0.0826362	0.999981	FALSE	14.5204	-0.0942635	NA	FALSE	388.68	0.249061	0.957136	FALSE
ENSG00000055118	KCNH2	chr7:150642048-150675403	chr7:150672903-150677903	27.4009	-1.37226	0.00633479	FALSE	1.49358	-1.73888	0.330855	FALSE	319.337	2.05757	0.636282	FALSE	1235.66	0.713778	0.126528	FALSE	201.345	-0.73478	0.00552147	TRUE	281.803	0.64482	0.198838	FALSE	23.7506	-0.223395	0.766066	FALSE	928.927	-0.0155252	0.999947	FALSE	198.375	-0.523849	0.782679	FALSE	293.682	-0.533489	0.998239	FALSE	9.17201	0.114996	NA	FALSE
ENSG00000055130	CUL1	chr7:148395005-148498128	chr7:148392505-148397505	4765.68	-0.378239	0.02162	FALSE	3712.73	-0.485117	2.17388e-17	FALSE	5680.48	0.10999	0.786695	FALSE	164.189	0.422676	0.584434	FALSE	3186.68	0.137644	0.192619	FALSE	30.7103	0.32169	0.667063	FALSE	489.692	-0.310905	0.437133	FALSE	169.038	-0.117598	0.999947	FALSE	4364.91	-0.431585	0.999981	FALSE	21.6402	-0.257493	NA	FALSE	863.491	-0.0745793	0.986935	FALSE
ENSG00000055147	FAM114A2	chr5:153369687-153418496	chr5:153415996-153420996	2654.17	-0.261524	0.0529575	FALSE	2054.26	0.0294254	0.804789	FALSE	1895.32	0.0526979	0.933697	FALSE	85.9208	0.195895	0.794232	FALSE	1275.62	0.0922781	0.532873	FALSE	9.56124	0.423609	NA	FALSE	150.251	-0.203023	0.698183	FALSE	99.5931	0.312086	0.999947	FALSE	1689.16	-0.0863505	0.999981	FALSE	12.7533	0.151599	NA	FALSE	158.482	-0.0644286	0.988276	FALSE
ENSG00000055163	CYFIP2	chr5:156693088-156822606	chr5:156690588-156695588	1993.02	0.0113261	0.982378	FALSE	3045.9	-0.150791	0.526651	FALSE	7886.94	-0.90076	0.000971737	FALSE	613.662	-0.0653278	0.926434	FALSE	2113.15	0.0975169	0.501632	FALSE	159.189	0.759562	0.0496259	FALSE	68.3138	0.27785	0.668388	FALSE	265.683	0.0343782	0.999947	FALSE	5492.54	-0.0980108	0.999981	FALSE	44.0625	-0.249358	0.999877	FALSE	172.907	0.294963	0.944892	FALSE
ENSG00000055208	TAB2	chr6:149539776-149732749	chr6:149537276-149542276	4082.99	-0.344964	0.108369	FALSE	3736.02	-0.214853	0.233167	FALSE	17064.3	-0.206524	0.406543	FALSE	696.118	-0.00211469	0.997493	FALSE	3787.36	0.278581	0.022578	FALSE	31.3103	-0.398795	0.589719	FALSE	15.2486	0.452935	NA	FALSE	628.881	0.271345	0.999947	FALSE	6933.03	0.00900299	0.999981	FALSE	17.4764	0.416136	NA	FALSE	12.1003	0.218465	NA	FALSE
ENSG00000055211	GINM1	chr6:149887429-149912884	chr6:149884929-149889929	4516.99	-0.712586	6.81667e-05	FALSE	3733.95	0.193932	0.50835	FALSE	3894.18	-0.156698	0.752472	FALSE	32.6784	0.549388	0.504054	FALSE	682.958	0.158414	0.295382	FALSE	9.88052	-0.123004	NA	FALSE	202.634	-0.292379	0.446376	FALSE	44.6277	0.00680611	0.999947	FALSE	1055.31	-0.0482828	0.999981	FALSE	16.3166	-0.199834	NA	FALSE	279.293	0.462877	0.697818	FALSE
ENSG00000055332	EIF2AK2	chr2:37326352-37384208	chr2:37381708-37386708	7265.86	0.574681	0.0230966	FALSE	7063.19	-0.482576	0.00941795	FALSE	10912	-0.250559	0.368338	FALSE	68.5944	0.660338	0.457799	FALSE	2023	0.185106	0.108991	FALSE	13.3289	0.446438	NA	FALSE	279.94	-0.465323	0.28491	FALSE	111.749	0.219793	0.999947	FALSE	4002.51	-0.0640222	0.999981	FALSE	12.007	-0.109318	NA	FALSE	471.059	0.169275	0.977409	FALSE
ENSG00000055483	USP36	chr17:76783462-76837523	chr17:76835023-76840023	1751.08	0.412528	0.068613	FALSE	1581.17	-0.268159	0.377746	FALSE	8881.63	0.303892	0.321866	FALSE	69.2272	0.706017	0.412083	FALSE	2375.6	0.146789	0.229089	FALSE	8.57969	0.757432	NA	FALSE	652.307	-0.246883	0.598681	FALSE	95.4938	0.036816	0.999947	FALSE	3472.76	-0.0460354	0.999981	FALSE	18.8207	-0.497498	NA	FALSE	1002.05	0.305039	0.906994	FALSE
ENSG00000055609	KMT2C	chr7:151832009-152133090	chr7:152130590-152135590	6182.01	0.410412	0.332684	FALSE	3024	-0.53846	0.000209998	FALSE	17558.6	-0.26772	0.144081	FALSE	580.068	0.288617	0.65418	FALSE	6620.06	0.00118366	0.993813	FALSE	4.74466	-0.242489	NA	FALSE	278.83	-0.648365	0.0831326	FALSE	525.604	-0.149747	0.999947	FALSE	8995.76	-0.35405	0.999981	FALSE	8.10531	-0.443016	NA	FALSE	388.428	-0.251414	0.969338	FALSE
ENSG00000055732	MCOLN3	chr1:85483764-85514182	chr1:85511682-85516682	6.63804	-0.585056	0.669773	FALSE	1466.16	-0.681664	1.79254e-05	FALSE	690.254	0.00338508	0.998513	FALSE	917.669	0.588706	0.177996	FALSE	230.824	-0.154829	0.47433	FALSE	650.568	0.627923	0.120289	FALSE	14.8739	-0.330304	NA	FALSE	62.0033	-0.0336775	0.999947	FALSE	1493.36	-0.148356	0.999981	FALSE	30.3473	-0.33481	0.999877	FALSE	263.723	0.307715	0.923696	FALSE
ENSG00000055813	CCDC85A	chr2:56411257-56613308	chr2:56408757-56413757	2076.31	-1.40973	0.046808	TRUE	964.615	3.25436	1.50119e-22	TRUE	1657.05	-2.03369	0.000164683	TRUE	444.919	0.0773795	0.912756	FALSE	3292.74	-0.0209139	0.93977	FALSE	11.5838	1.03488	NA	FALSE	141.585	-0.594647	0.140673	FALSE	778.137	-0.165241	0.999947	FALSE	3447.76	0.55216	0.480102	FALSE	54.5468	-0.800405	0.638248	FALSE	105.035	1.02179	0.0494282	TRUE
ENSG00000055917	PUM2	chr2:20448451-20551995	chr2:20549495-20554495	5212.67	0.0609737	0.873451	FALSE	6428.27	-0.101942	0.455216	FALSE	16511.8	-0.0868686	0.842372	FALSE	143.825	0.668806	0.397396	FALSE	3761.91	0.309339	0.0166223	FALSE	16.3924	0.576356	0.472676	FALSE	318.561	-0.290143	0.481663	FALSE	223.239	0.279932	0.999947	FALSE	7189.25	0.000790289	0.999981	FALSE	13.4287	-0.291439	NA	FALSE	557.875	0.307687	0.903482	FALSE
ENSG00000055950	MRPL43	chr10:102729214-102747272	chr10:102744772-102749772	3046.82	0.0465233	0.912662	FALSE	2287.47	0.393853	3.78432e-05	FALSE	3768.16	0.295576	0.217231	FALSE	44.8583	0.820111	0.238347	FALSE	467.77	0.132764	0.533413	FALSE	10.8121	-0.0299534	NA	FALSE	170.179	0.0409588	0.942296	FALSE	41.4646	0.107553	0.999947	FALSE	544.143	-0.00046865	0.999981	FALSE	10.5386	0.396241	NA	FALSE	168.143	0.335825	0.916532	FALSE
ENSG00000055955	ITIH4	chr3:52846990-52865495	chr3:52862995-52867995	87.4267	1.54652	0.000135687	TRUE	96.0887	0.310781	0.483405	FALSE	37.5481	-0.861365	0.333864	FALSE	217.246	0.717106	0.117982	FALSE	200.886	-0.414932	0.0759843	FALSE	16.1819	0.215208	0.815057	FALSE	57.8236	-0.0718079	0.914105	FALSE	106.682	0.0605439	0.999947	FALSE	295.311	0.00442661	0.999981	FALSE	18.1404	-0.130531	NA	FALSE	13.7217	0.264722	NA	FALSE
ENSG00000055957	ITIH1	chr3:52811602-52826078	chr3:52809102-52814102	2.05761	0.353263	0.889382	FALSE	0.615642	-0.446483	NA	FALSE	0.324276	-0.167308	NA	FALSE	522.574	0.317705	0.542873	FALSE	88.0441	-0.546479	0.0428374	FALSE	108.145	0.748191	0.137913	FALSE	16.7059	0.266691	NA	FALSE	239.705	-0.124056	0.999947	FALSE	108.828	-0.0590539	0.999981	FALSE	56.8257	-0.115752	0.999877	FALSE	5.55002	0.111814	NA	FALSE
ENSG00000056050	C4orf27	chr4:170650615-170679104	chr4:170676604-170681604	1540.98	-0.125901	0.703704	FALSE	1746.96	0.157236	0.160405	FALSE	961.23	-0.0182097	0.984019	FALSE	36.2338	0.436116	0.616271	FALSE	790.46	0.161255	0.327272	FALSE	42.536	0.551669	0.341257	FALSE	54.402	0.291748	0.609648	FALSE	41.424	0.138316	0.999947	FALSE	1236.62	0.0562859	0.999981	FALSE	24.5432	0.335895	0.999877	FALSE	86.6114	0.347474	0.924938	FALSE
ENSG00000056097	ZFR	chr5:32354455-32444867	chr5:32442367-32447367	12163.2	-0.147132	0.41614	FALSE	8974.38	-0.0536646	0.7115	FALSE	16286.6	0.0309044	0.945403	FALSE	127.045	0.544233	0.50783	FALSE	3411.31	0.235099	0.0538736	FALSE	15.6653	-0.0796946	0.943355	FALSE	298.325	-0.634519	0.109174	FALSE	178.216	0.0673629	0.999947	FALSE	5652.65	-0.0609191	0.999981	FALSE	30.1726	-0.310814	0.999877	FALSE	465.813	0.0342228	0.994686	FALSE
ENSG00000056277	ZNF280C	chrX:129336684-129402873	chrX:129400373-129405373	708.51	0.300576	0.440266	FALSE	279.621	-0.164288	0.290765	FALSE	1202.04	-0.0434417	0.96475	FALSE	43.6299	0.520157	0.560341	FALSE	1098.63	0.320152	0.0209955	FALSE	15.1018	0.735314	0.323679	FALSE	84.4222	-0.190476	0.716512	FALSE	67.1248	0.236508	0.999947	FALSE	1566.83	-0.0723273	0.999981	FALSE	19.1012	-0.0770799	NA	FALSE	121.681	0.149746	0.986171	FALSE
ENSG00000056291	NPFFR2	chr4:72897520-73013784	chr4:72895020-72900020	251.18	-2.38771	8.64441e-06	TRUE	171.015	-0.0106572	0.994114	FALSE	980.577	-1.43365	0.131992	FALSE	565.276	0.71973	0.116296	FALSE	1024.91	-0.150986	0.516053	FALSE	57.1613	1.24005	0.0101245	TRUE	41.9856	-0.208816	0.752236	FALSE	549.769	-0.00845571	0.999947	FALSE	1741.23	0.247008	0.999981	FALSE	91.8492	-0.68471	0.841248	FALSE	27.2774	0.512182	0.744676	FALSE
ENSG00000056487	PHF21B	chr22:45277041-45405880	chr22:45403380-45408380	33.2988	-0.779433	0.227352	FALSE	22.0515	-3.19294	0.00217378	FALSE	1.14056	0.536861	NA	FALSE	8795.21	0.649954	0.154961	FALSE	655.487	-0.951895	0.000145772	TRUE	350.084	1.1572	0.0123987	TRUE	47.1203	-1.48201	0.000256353	TRUE	5704.88	-0.117742	0.999947	FALSE	682.239	-0.343429	0.999981	FALSE	397.559	-0.288552	0.999877	FALSE	34.3447	-0.275855	0.963033	FALSE
ENSG00000056558	TRAF1	chr9:123664670-123691451	chr9:123688951-123693951	195.213	2.36146	3.59777e-09	TRUE	797.165	0.127084	0.804316	FALSE	426.285	1.22389	0.0104737	TRUE	470.893	-0.596258	0.409792	FALSE	328.162	0.282539	0.203032	FALSE	23.758	0.147802	0.867164	FALSE	176.207	0.307907	0.525351	FALSE	164.079	-0.50351	0.999947	FALSE	1095.63	0.134355	0.999981	FALSE	30.0659	-0.610564	0.934468	FALSE	382.905	0.463307	0.72121	FALSE
ENSG00000056586	RC3H2	chr9:125606834-125667620	chr9:125665120-125670120	10198.7	-0.837135	3.89083e-05	FALSE	8332.12	0.272963	0.0552668	FALSE	12413.1	-0.368754	0.370572	FALSE	69.8259	0.657053	0.413043	FALSE	2126.16	0.19498	0.107341	FALSE	8.11947	0.673242	NA	FALSE	316.234	-0.324771	0.496749	FALSE	102.606	0.262902	0.999947	FALSE	3647.9	-0.0240297	0.999981	FALSE	16.9608	0.0308306	NA	FALSE	441.388	0.143332	0.981125	FALSE
ENSG00000056661	PCGF2	chr17:36890149-36906070	chr17:36903570-36908570	829.897	0.449256	0.063856	FALSE	519.744	-0.0460178	0.87155	FALSE	5651.16	0.0278064	0.954394	FALSE	20.6847	0.166333	0.867313	FALSE	565.593	0.166313	0.355586	FALSE	7.27524	0.483426	NA	FALSE	416.952	-0.306405	0.394415	FALSE	33.0777	-0.0662874	0.999947	FALSE	775.865	0.0570924	0.999981	FALSE	17.1296	0.0257316	NA	FALSE	606.243	0.327674	0.912614	FALSE
ENSG00000056678	KIFC1	chr6_mcf_hap5:4833068-4833398	chr6_mcf_hap5:4830568-4833398	0	NA	NA	FALSE	0	NA	NA	FALSE	0	NA	NA	FALSE	0	NA	NA	FALSE	0	NA	NA	FALSE	0	NA	NA	FALSE	0	NA	NA	FALSE	0	NA	NA	FALSE	0	NA	NA	FALSE	0	NA	NA	FALSE	0	NA	NA	FALSE
ENSG00000056736	IL17RB	chr3:53880606-53899827	chr3:53878106-53883106	265.2	0.3611	0.127049	FALSE	119.582	0.19125	0.621526	FALSE	180.062	0.0582517	0.957643	FALSE	210.637	-0.291472	0.680802	FALSE	398.312	0.115668	0.612382	FALSE	124.059	-0.419869	0.518365	FALSE	48.7634	0.31816	0.595952	FALSE	200.809	-0.0228888	0.999947	FALSE	391.5	-0.0655768	0.999981	FALSE	190.383	-0.534051	0.999877	FALSE	41.1069	0.43378	0.865064	FALSE
ENSG00000056972	TRAF3IP2	chr6:111877656-111927481	chr6:111924981-111929981	1371.73	-0.487099	0.0313116	FALSE	1369.34	-0.691634	3.20925e-07	FALSE	4100.58	0.25287	0.34251	FALSE	66.4267	0.587196	0.480418	FALSE	1602.48	0.262907	0.0244366	FALSE	8.05543	0.263978	NA	FALSE	382.843	-0.592495	0.170178	FALSE	96.876	0.0573086	0.999947	FALSE	3030.78	-0.178923	0.999981	FALSE	12.779	-0.351595	NA	FALSE	396.041	-0.29584	0.933857	FALSE
ENSG00000056998	GYG2	chrX:2746828-2800859	chrX:2744328-2749328	733.311	-2.54592	3.91243e-08	TRUE	412.288	3.28716	6.60405e-29	TRUE	454.115	-1.10559	0.00234007	TRUE	260.271	3.01686	8.99911e-10	TRUE	454.196	-0.718851	0.0108861	TRUE	54.4601	2.33537	2.77725e-07	TRUE	40.0715	-1.04101	0.0340506	TRUE	321.659	-1.16965	0.0669592	FALSE	467.814	0.702375	0.198476	FALSE	84.4411	-1.07064	0.26258	FALSE	33.4487	1.2314	0.0093223	TRUE
ENSG00000057019	DCBLD2	chr3:98514784-98620533	chr3:98618033-98623033	58344	1.45704	7.1201e-07	TRUE	55689.6	0.319642	0.0537419	FALSE	119871	0.206057	0.702787	FALSE	129.753	0.600948	0.482856	FALSE	3149.02	0.652365	5.027e-08	TRUE	8.07005	0.725468	NA	FALSE	314.991	0.276942	0.560448	FALSE	221.961	0.213689	0.999947	FALSE	7254.56	0.0263222	0.999981	FALSE	19.4571	-0.210149	NA	FALSE	622.695	0.30234	0.914772	FALSE
ENSG00000057149	SERPINB3	chr18:61322430-61329197	chr18:61326697-61331697	286.763	11.5273	5.61069e-07	TRUE	31.0478	-2.82074	8.32213e-11	FALSE	79.8274	4.1592	1.02757e-07	TRUE	64.3058	-2.23601	9.96523e-06	TRUE	31.5556	0.537113	0.0880277	FALSE	53.4787	-2.18913	2.70972e-05	TRUE	26.0958	1.42205	0.0062498	TRUE	18.8817	0.304042	0.999947	FALSE	91.2881	0.0597639	0.999981	FALSE	18.9809	0.201543	NA	FALSE	6.35253	-0.209827	NA	FALSE
ENSG00000057252	SOAT1	chr1:179262924-179327815	chr1:179260424-179265424	8149.16	-0.219078	0.610446	FALSE	11387.8	-0.159068	0.622812	FALSE	28211.9	-0.0292925	0.95514	FALSE	80.1441	0.479293	0.569665	FALSE	2085.03	0.135689	0.259331	FALSE	8.42531	0.602289	NA	FALSE	190.672	-0.273398	0.526692	FALSE	107.254	0.275468	0.999947	FALSE	3431.08	-0.0603374	0.999981	FALSE	10.7649	-0.0354796	NA	FALSE	241.794	0.230795	0.975901	FALSE
ENSG00000057294	PKP2	chr12:32943678-33049774	chr12:33047274-33052274	1590.25	-4.32796	0.000297169	TRUE	1133.68	-2.31968	1.24977e-48	TRUE	5515.53	-1.70894	0.00895807	TRUE	2990.14	4.09869	4.79292e-20	TRUE	1173.64	-0.383009	0.0873742	FALSE	189.417	4.07084	5.39216e-19	TRUE	90.6748	-0.886562	0.0961079	FALSE	867.115	1.44013	0.00359077	TRUE	3242.29	-0.227341	0.999981	FALSE	69.1224	1.06355	0.24033	FALSE	133.119	-0.261945	0.972901	FALSE
ENSG00000057468	MSH4	chr1:76262566-76378923	chr1:76260066-76265066	37.2548	-0.157421	0.85986	FALSE	92.7902	-0.685127	0.0155919	FALSE	60.8941	0.0862134	0.962879	FALSE	1076.16	0.125021	0.815604	FALSE	853.835	-0.0818531	0.650056	FALSE	6.70649	0.998406	NA	FALSE	43.0271	-0.0572426	0.937684	FALSE	658.835	0.635743	0.999947	FALSE	1759.44	-0.339268	0.999981	FALSE	10.7856	-0.205746	NA	FALSE	37.7718	-0.463747	0.830199	FALSE
ENSG00000057593	F7	chr13:113760104-113774995	chr13:113757604-113762604	2.54791	-1.27315	0.524971	FALSE	0.934284	0.466916	NA	FALSE	0.324276	-0.167308	NA	FALSE	531.78	0.454011	0.395628	FALSE	32.5744	-0.358504	0.269362	FALSE	56.8571	0.893236	0.0651696	FALSE	18.9152	0.168112	0.826097	FALSE	444.255	-0.212036	0.999947	FALSE	41.2941	0.0219293	NA	FALSE	44.92	0.00837338	0.999877	FALSE	12.368	-0.239008	NA	FALSE
ENSG00000057608	GDI2	chr10:5807185-5884095	chr10:5881595-5886595	21230.9	-0.13426	0.556309	FALSE	19142.1	0.197605	0.223096	FALSE	23584.5	-0.0454941	0.901355	FALSE	253.655	0.366443	0.536378	FALSE	2011.67	0.260691	0.0153169	FALSE	95.4799	0.560474	0.244561	FALSE	18.0819	0.5414	0.412039	FALSE	213.261	-0.0988652	0.999947	FALSE	3273.45	-0.017355	0.999981	FALSE	45.3962	-0.222358	0.999877	FALSE	4.07308	0.135979	NA	FALSE
ENSG00000057657	PRDM1	chr6:106534194-106557814	chr6:106531694-106536694	64.5311	-0.496954	0.558712	FALSE	120.849	0.333327	0.622065	FALSE	355.951	-0.653802	0.843649	FALSE	71.9553	0.0431519	0.959859	FALSE	424.313	-0.179372	0.315898	FALSE	7.04149	0.16567	NA	FALSE	199.093	-0.11602	0.859067	FALSE	77.2842	-0.0787886	0.999947	FALSE	769.351	0.12962	0.999981	FALSE	13.5772	0.011222	NA	FALSE	155.308	0.212107	0.977023	FALSE
ENSG00000057663	ATG5	chr6:106632350-106773666	chr6:106771166-106776166	4717.23	-0.767644	0.000728639	FALSE	4265.13	0.224668	0.0517825	FALSE	3912.77	-0.0620145	0.86761	FALSE	196.682	0.632926	0.429339	FALSE	3355.41	0.272858	0.0268688	FALSE	26.0046	1.55149	0.00631957	TRUE	245.22	-0.147953	0.769253	FALSE	295.843	0.265674	0.999947	FALSE	6024.05	0.0546741	0.999981	FALSE	18.1391	0.233295	NA	FALSE	305.417	0.0310415	0.995297	FALSE
ENSG00000057704	TMCC3	chr12:94960899-95044338	chr12:95041838-95046838	103.708	2.84393	0.000273964	TRUE	304.629	-1.00167	0.0169074	TRUE	71.7138	0.738217	0.658172	FALSE	1217.24	-0.44628	0.462748	FALSE	606.401	0.000190861	0.999476	FALSE	161.538	0.0548494	0.929683	FALSE	29.9626	0.149796	0.841838	FALSE	433.606	-0.673529	0.999947	FALSE	2145.46	0.0250753	0.999981	FALSE	91.7849	-1.32751	0.0517489	FALSE	284.468	0.908797	0.0551006	FALSE
ENSG00000057757	PITHD1	chr1:24104894-24114722	chr1:24102394-24107394	2916.98	-0.253694	0.457851	FALSE	3212.26	-0.205663	0.370972	FALSE	3507.3	-0.0207462	0.976602	FALSE	14.0403	0.709328	0.457498	FALSE	344.858	0.223948	0.238363	FALSE	6.23354	1.14971	NA	FALSE	236.424	-0.251233	0.58305	FALSE	17.2326	-0.0453024	0.999947	FALSE	574.017	-0.151712	0.999981	FALSE	11.6646	0.0264144	NA	FALSE	313.149	0.0712032	0.987227	FALSE
ENSG00000057935	MTA3	chr2:42721708-42984087	chr2:42719208-42724208	1976.73	-0.225196	0.199682	FALSE	1412.39	-0.0779931	0.42311	FALSE	2570.22	-0.310687	0.242315	FALSE	880.904	0.467402	0.365957	FALSE	4597.71	-0.0633502	0.589068	FALSE	66.2011	-0.262662	0.676981	FALSE	56.8427	0.38406	0.481661	FALSE	713.879	-0.00826968	0.999947	FALSE	6918.1	-0.0321449	0.999981	FALSE	128.159	-1.2023	0.119537	FALSE	66.1868	1.37381	0.00132578	TRUE
ENSG00000058056	USP13	chr3:179370542-179507189	chr3:179368042-179373042	1697.12	-0.124543	0.694108	FALSE	1354.45	0.248203	0.266995	FALSE	3544.04	-0.110786	0.856565	FALSE	162.91	0.39807	0.602464	FALSE	3399.06	0.105397	0.463811	FALSE	16.0408	0.204251	0.840601	FALSE	261.488	-0.641053	0.0709239	FALSE	211.424	0.151533	0.999947	FALSE	4103.93	0.0409619	0.999981	FALSE	19.4456	-0.159415	NA	FALSE	506.461	0.326038	0.888413	FALSE
ENSG00000058063	ATP11B	chr3:182511287-182639423	chr3:182508787-182513787	23765.6	-1.21793	0.000431837	TRUE	13987.9	1.09009	3.77171e-08	TRUE	8380.12	-0.538289	0.0212175	FALSE	173.688	0.543716	0.482529	FALSE	4226.26	-0.0219428	0.884816	FALSE	11.1249	0.582676	NA	FALSE	484.671	-0.828391	0.0197679	FALSE	255.709	0.264508	0.999947	FALSE	7123.23	0.160107	0.999981	FALSE	14.5627	-0.0612119	NA	FALSE	704.397	0.285188	0.917918	FALSE
ENSG00000058085	LAMC2	chr1:183155372-183214035	chr1:183152872-183157872	74.6892	-0.0675846	0.918346	FALSE	148.104	-0.888567	5.53553e-05	FALSE	1686.7	1.96113	0.249281	FALSE	383.002	-0.0334846	0.956716	FALSE	586.001	-0.0263732	0.905896	FALSE	24.2696	0.270892	0.746286	FALSE	23.3457	0.454917	0.455571	FALSE	192.88	0.0373124	0.999947	FALSE	1004.66	0.123767	0.999981	FALSE	18.0841	-0.263198	NA	FALSE	15.1618	0.245552	0.975918	FALSE
ENSG00000058091	CDK14	chr7:90095737-90839905	chr7:90093237-90098237	5009.96	-0.533054	0.000283121	FALSE	5936.28	-0.32587	0.0140898	FALSE	7492.48	-0.415065	0.0195715	FALSE	1732.98	0.138674	0.830491	FALSE	12343.9	0.137813	0.303032	FALSE	10.4206	0.214564	NA	FALSE	37.3402	0.0409166	0.95524	FALSE	1754.14	0.272367	0.999947	FALSE	21385	-0.0729717	0.999981	FALSE	12.1625	0.262574	NA	FALSE	27.6109	-0.151733	0.986935	FALSE
ENSG00000058262	SEC61A1	chr3:127770483-127790526	chr3:127767983-127772983	38486.3	-0.138025	0.711539	FALSE	36189.8	-0.493273	1.08719e-05	FALSE	79033.1	-0.0868296	0.709488	FALSE	24.3606	0.505155	0.58068	FALSE	969.849	0.410978	0.000719713	FALSE	31.2557	-0.525987	0.497834	FALSE	321.179	-0.423922	0.338419	FALSE	38.6004	-0.093187	0.999947	FALSE	1578.78	-0.2262	0.999981	FALSE	19.7932	0.0170531	NA	FALSE	408.143	-0.144357	0.982148	FALSE
ENSG00000058272	PPP1R12A	chr12:80167342-80329240	chr12:80326740-80331740	12372.1	-0.532092	0.000292088	FALSE	11751.8	0.0955709	0.363259	FALSE	17177.4	-0.485137	0.00500866	FALSE	229.21	0.554001	0.458633	FALSE	4356.66	0.185906	0.193765	FALSE	6.22185	0.368298	NA	FALSE	541.951	-0.277895	0.595184	FALSE	339.857	0.240547	0.999947	FALSE	8519.98	0.0226797	0.999981	FALSE	15.7631	-0.122971	NA	FALSE	582.758	0.00199555	0.999759	FALSE
ENSG00000058335	RASGRF1	chr15:79252288-79383115	chr15:79380615-79385615	283.426	-2.75152	9.52819e-13	TRUE	74.981	-0.655565	0.00543178	FALSE	238.031	-0.822301	0.136725	FALSE	3619.4	0.071767	0.89585	FALSE	1098.46	-0.451085	0.0535456	FALSE	478.492	-0.608959	0.128613	FALSE	16.6365	-0.0749941	NA	FALSE	1695.94	-0.0693837	0.999947	FALSE	1925.8	-0.174781	0.999981	FALSE	340.076	-0.326995	0.999877	FALSE	7.34333	0.200442	NA	FALSE
ENSG00000058404	CAMK2B	chr7:44256748-44374176	chr7:44371676-44376676	10.9915	0.501738	0.487573	FALSE	11.0073	1.22573	0.186155	FALSE	9.27382	1.11304	0.392412	FALSE	4175.72	0.321037	0.502429	FALSE	714.128	-0.596393	0.000619938	TRUE	172.283	0.413658	0.391914	FALSE	12.708	-0.130538	NA	FALSE	2819.77	0.282257	0.999947	FALSE	1345.89	0.330278	0.999981	FALSE	100.48	0.239835	0.999877	FALSE	6.2536	0.271596	NA	FALSE
ENSG00000058453	CROCC	chr1:17066767-17299474	chr1:17064267-17069267	3162.45	0.62632	0.0463006	FALSE	2670.35	-0.0335299	0.813414	FALSE	324.207	-0.201181	0.578342	FALSE	1922.83	0.649089	0.105409	FALSE	1893.21	0.00525669	0.979572	FALSE	0	NA	NA	FALSE	0	NA	NA	FALSE	1012	-0.392831	0.999947	FALSE	2144.59	0.00217436	0.999981	FALSE	0	NA	NA	FALSE	0	NA	NA	FALSE
ENSG00000058600	POLR3E	chr16:22308729-22346424	chr16:22306229-22311229	3005.7	0.199663	0.326185	FALSE	2025.12	0.0884077	0.700931	FALSE	2534.96	0.171357	0.830208	FALSE	48.5325	0.386277	0.629984	FALSE	1546.75	0.151734	0.275778	FALSE	4.67725	0.19684	NA	FALSE	340.564	-0.188424	0.737009	FALSE	62.3264	0.0218384	0.999947	FALSE	1914.02	-0.102793	0.999981	FALSE	10.9389	-0.119641	NA	FALSE	362.14	0.283019	0.932956	FALSE
ENSG00000058668	ATP2B4	chr1:203595688-203713209	chr1:203593188-203598188	7791.85	0.300656	0.499342	FALSE	2258.06	-0.0816093	0.850758	FALSE	29763.4	0.412563	0.474252	FALSE	173.88	0.199046	0.787011	FALSE	3404.66	0.179291	0.108242	FALSE	10.2124	0.376013	NA	FALSE	300.078	-0.236463	0.584582	FALSE	169.168	0.139414	0.999947	FALSE	3352.04	-0.135793	0.999981	FALSE	14.1043	-0.0310038	NA	FALSE	192.686	-0.223394	0.977023	FALSE
ENSG00000058673	ZC3H11A	chr1:203764781-203823252	chr1:203762281-203767281	18385.3	0.166038	0.591042	FALSE	10372.9	-0.0395986	0.882466	FALSE	21974.9	-0.225586	0.436618	FALSE	61.4684	0.393224	0.633941	FALSE	2206.22	0.286221	0.0207768	FALSE	5.6287	0.383124	NA	FALSE	328.96	-0.416094	0.3192	FALSE	83.1052	0.167316	0.999947	FALSE	3140.59	-0.0543564	0.999981	FALSE	9.5745	-0.157845	NA	FALSE	286.533	-0.00486881	0.999209	FALSE
ENSG00000058729	RIOK2	chr5:96496570-96518964	chr5:96516464-96521464	2390.68	-0.536225	1.7342e-05	FALSE	2520.3	0.0551351	0.714434	FALSE	1972.1	0.0301046	0.95514	FALSE	32.2179	0.443531	0.597438	FALSE	872.52	0.193387	0.215228	FALSE	9.59526	0.0263952	NA	FALSE	258.819	-0.136198	0.81107	FALSE	38.1093	0.0712565	0.999947	FALSE	1533.35	0.00964543	0.999981	FALSE	15.3968	-0.202221	NA	FALSE	230.787	-0.136087	0.986935	FALSE
ENSG00000058799	YIPF1	chr1:54317391-54356407	chr1:54353907-54358907	1677.45	-0.0912242	0.764091	FALSE	1466.54	-0.171232	0.151109	FALSE	2953.98	-0.129135	0.725563	FALSE	54.9986	0.359207	0.654226	FALSE	1247.54	0.0532688	0.72502	FALSE	15.1527	0.420141	0.647753	FALSE	150.858	0.38217	0.409047	FALSE	54.4154	0.175093	0.999947	FALSE	1850.92	-0.183933	0.999981	FALSE	13.6022	-0.139533	NA	FALSE	211.682	-0.173448	0.977409	FALSE
ENSG00000058804	NDC1	chr1:54231132-54304533	chr1:54302033-54307033	6715.67	-0.262562	0.512465	FALSE	6133.17	0.305412	0.238373	FALSE	10534.8	0.178739	0.704048	FALSE	93.4608	0.686362	0.336246	FALSE	2236.59	0.361541	0.000725513	FALSE	57.0547	0.462979	0.46211	FALSE	244.795	-0.115882	0.802258	FALSE	126.96	-0.00511085	0.999947	FALSE	3510.4	0.0128742	0.999981	FALSE	32.5115	-0.375384	0.999877	FALSE	360.786	0.166025	0.977409	FALSE
ENSG00000058866	DGKG	chr3:185823456-186080026	chr3:186077526-186082526	915.326	-0.125077	0.772058	FALSE	333.905	-0.0735684	0.907483	FALSE	264.845	0.847454	0.107368	FALSE	3612.08	0.441731	0.51699	FALSE	3058.17	-0.249315	0.07918	FALSE	74.0837	0.282448	0.764176	FALSE	55.8035	-0.846385	0.0710129	FALSE	3602.85	0.0296167	0.999947	FALSE	3192.28	-0.0669277	0.999981	FALSE	243.268	-0.0643391	0.999877	FALSE	16.0102	0.0671089	0.987606	FALSE
ENSG00000059122	FLYWCH1	chr16:2961937-3001209	chr16:2959437-2964437	3887.71	-0.247782	0.521825	FALSE	7300.66	-0.370464	1.45785e-05	FALSE	4089.87	-0.170956	0.692197	FALSE	50.9855	0.702635	0.398892	FALSE	1320.07	0.0280544	0.877331	FALSE	10.3116	1.33082	NA	FALSE	299.805	-0.608035	0.0689103	FALSE	64.7835	-0.152155	0.999947	FALSE	2078.43	-0.185676	0.999981	FALSE	12.2494	-0.0669762	NA	FALSE	405.908	-0.112931	0.986935	FALSE
ENSG00000059145	UNKL	chr16:1413205-1464752	chr16:1462252-1467252	2018.46	-0.0646563	0.817667	FALSE	1945.93	0.205289	0.0463616	FALSE	2454.71	0.23805	0.608457	FALSE	65.1637	0.148493	0.849527	FALSE	1496.17	0.221227	0.0991534	FALSE	7.39155	0.556865	NA	FALSE	129.857	-0.176383	0.735092	FALSE	90.4978	-0.130526	0.999947	FALSE	2038.28	0.0299915	0.999981	FALSE	10.4611	0.0349841	NA	FALSE	273.076	0.19767	0.977023	FALSE
ENSG00000059377	TBXAS1	chr7:139476849-139720125	chr7:139474349-139479349	103.288	0.937998	0.13986	FALSE	61.9626	-0.714382	0.0241993	FALSE	66.5727	0.239894	0.701792	FALSE	4539.84	0.181566	0.737075	FALSE	1836.58	-0.336875	0.0116551	FALSE	12.2968	0.219318	NA	FALSE	387.561	-0.544043	0.220974	FALSE	2202.75	-0.0494141	0.999947	FALSE	2722.35	-0.349101	0.999981	FALSE	16.3701	-0.639392	NA	FALSE	550.567	-0.136964	0.986935	FALSE
ENSG00000059378	PARP12	chr7:139723543-139763521	chr7:139761021-139766021	1968.95	0.136827	0.75544	FALSE	2655.17	-1.04619	7.17718e-05	TRUE	3480.99	0.69059	0.500773	FALSE	67.2305	0.123981	0.87791	FALSE	1183.66	-0.000329284	0.99875	FALSE	20.2573	0.588289	0.422694	FALSE	324.951	-0.779206	0.0349615	FALSE	78.9102	-0.130106	0.999947	FALSE	2204.58	-0.412852	0.999981	FALSE	26.897	-0.305937	0.999877	FALSE	596.764	-0.215997	0.972962	FALSE
ENSG00000059573	ALDH18A1	chr10:97365695-97416463	chr10:97413963-97418963	7903.42	-0.305127	0.263248	FALSE	5933.12	0.0887375	0.790176	FALSE	8713	-0.0456267	0.929283	FALSE	62.7265	0.490508	0.562078	FALSE	2048.08	0.0217573	0.89164	FALSE	16.0241	0.578257	0.457536	FALSE	125.944	-0.170156	0.723212	FALSE	71.8448	0.376372	0.999947	FALSE	2398.2	-0.203274	0.999981	FALSE	12.2298	-0.29993	NA	FALSE	215.17	0.140549	0.986935	FALSE
ENSG00000059588	TARBP1	chr1:234527058-234614849	chr1:234612349-234617349	1320.71	0.0128832	0.981079	FALSE	1513.01	0.25562	0.183499	FALSE	1739.72	0.495661	0.0603577	FALSE	292.561	0.529318	0.483465	FALSE	1929.61	0.00748264	0.97468	FALSE	127.247	0.812238	0.0837746	FALSE	99.5942	-0.257256	0.601456	FALSE	165.842	0.192289	0.999947	FALSE	2790.03	0.000623189	0.999981	FALSE	22.5412	0.165295	NA	FALSE	289.696	0.351345	0.906518	FALSE
ENSG00000059691	PET112	chr4:152591655-152682175	chr4:152679675-152684675	1923.56	0.381282	0.0981344	FALSE	1846.55	0.228562	0.204986	FALSE	2690.59	0.151997	0.692035	FALSE	164.806	0.0734034	0.920091	FALSE	2271.7	0.22157	0.0524494	FALSE	37.1263	0.206284	0.789595	FALSE	117.417	0.158543	0.76534	FALSE	155.868	-0.0232326	0.999947	FALSE	3202.71	-0.121749	0.999981	FALSE	20.3075	0.0786088	NA	FALSE	100.917	0.196881	0.977409	FALSE
ENSG00000059728	MXD1	chr2:70124819-70170077	chr2:70122319-70127319	1324.88	0.0495596	0.895089	FALSE	1142.4	-0.10243	0.552287	FALSE	2589.7	0.388508	0.107873	FALSE	63.6522	0.422284	0.614242	FALSE	1634.34	0.277925	0.0523858	FALSE	5.49421	0.641013	NA	FALSE	25.7444	0.347795	0.591207	FALSE	91.2974	0.0786148	0.999947	FALSE	2659.1	-0.047521	0.999981	FALSE	8.03487	0.00253929	NA	FALSE	20.0701	0.111877	0.986935	FALSE
ENSG00000059758	CDK17	chr12:96672038-96794338	chr12:96791838-96796838	4421.62	0.215547	0.278197	FALSE	4801.79	0.0457678	0.806725	FALSE	3990.36	0.20994	0.305259	FALSE	168.916	0.439695	0.574617	FALSE	2818.37	0.361895	0.00863716	FALSE	6.54284	0.334969	NA	FALSE	720	-0.28515	0.519315	FALSE	244.002	0.18121	0.999947	FALSE	5827.79	-0.00757868	0.999981	FALSE	25.0002	-0.387982	0.999877	FALSE	1098.88	0.130768	0.983715	FALSE
ENSG00000059769	DNAJC25	chr9:114393631-114432508	chr9:114391131-114396131	4763	-0.264618	0.449842	FALSE	4986.11	0.0599306	0.76599	FALSE	6699.2	-0.0797595	0.90788	FALSE	56.3011	0.425799	0.564811	FALSE	900.473	0.232145	0.0978254	FALSE	7.1656	0.291438	NA	FALSE	213.722	-0.0581309	0.91847	FALSE	84.849	0.233735	0.999947	FALSE	1543.44	-0.0990666	0.999981	FALSE	11.2624	-0.275522	NA	FALSE	324.425	0.319848	0.905169	FALSE
ENSG00000059804	SLC2A3	chr12:8071825-8088871	chr12:8086371-8091371	3951.2	0.88437	0.00455151	FALSE	4226.36	0.0956351	0.904649	FALSE	8567.94	-0.334511	0.665157	FALSE	18.163	0.488744	0.600178	FALSE	477.293	0.345494	0.0262491	FALSE	6.56846	-0.125268	NA	FALSE	245.264	0.255532	0.644345	FALSE	36.7152	0.237109	0.999947	FALSE	1227.04	0.433824	0.999981	FALSE	17.4549	0.0255143	NA	FALSE	326.313	0.285745	0.951685	FALSE
ENSG00000059915	PSD	chr10:104162375-104181296	chr10:104178796-104183796	199.92	-0.395513	0.251154	FALSE	325.058	-0.185978	0.309825	FALSE	70.0808	0.169167	0.80103	FALSE	820.927	0.769199	0.0762134	FALSE	107.834	-0.242127	0.467282	FALSE	22.3744	-0.334602	0.681404	FALSE	186.845	-0.528069	0.153936	FALSE	605.249	-0.227165	0.999947	FALSE	303.689	0.0253204	0.999981	FALSE	48.5518	0.0347866	0.999877	FALSE	293.247	0.125115	0.986935	FALSE
ENSG00000060069	CTDP1	chr18:77439800-77514510	chr18:77437300-77442300	2361.49	-0.089808	0.700766	FALSE	2749.74	-0.153343	0.122196	FALSE	1894.04	-0.112618	0.753178	FALSE	127.647	0.900332	0.145549	FALSE	2290.64	-0.15508	0.343758	FALSE	8.32611	0.468356	NA	FALSE	676.264	-0.371209	0.38397	FALSE	132.226	0.0607736	0.999947	FALSE	2934.67	-0.185022	0.999981	FALSE	20.3231	-0.174619	NA	FALSE	938.344	0.291383	0.911158	FALSE
ENSG00000060138	YBX3	chr12:10851682-10875911	chr12:10873411-10878411	10218.2	0.0988876	0.782359	FALSE	11345.8	0.0493018	0.917282	FALSE	22956.3	-0.01946	0.970887	FALSE	33.1069	0.644774	0.467481	FALSE	948.449	0.276455	0.0582967	FALSE	21.8798	-0.107721	0.915924	FALSE	925.613	-0.0263493	0.961984	FALSE	85.1662	0.0414391	0.999947	FALSE	2522.36	0.396869	0.999981	FALSE	39.0389	-0.315546	0.999877	FALSE	1358.83	0.26327	0.950814	FALSE
ENSG00000060140	STYK1	chr12:10771537-10826917	chr12:10824417-10829417	281.681	-2.37448	2.68538e-05	TRUE	669.473	0.688218	0.493482	FALSE	720.878	0.0941826	0.943255	FALSE	275.289	0.548434	0.483025	FALSE	641.948	-0.231339	0.384719	FALSE	57.9785	0.324963	0.611361	FALSE	38.0466	0.453663	0.483031	FALSE	190.326	0.57303	0.999947	FALSE	2218.46	0.523099	0.743067	FALSE	21.5312	0.350398	NA	FALSE	55.9003	0.223678	0.977023	FALSE
ENSG00000060237	WNK1	chr12:861758-1020618	chr12:859258-864258	11622.1	-0.151208	0.705143	FALSE	9682.37	0.537859	0.126672	FALSE	45974.1	-0.177532	0.581834	FALSE	211.652	0.675219	0.373552	FALSE	4830.65	0.239864	0.0226263	FALSE	8.63267	0.0597352	NA	FALSE	427.436	-0.184948	0.663705	FALSE	526.752	0.695412	0.999947	FALSE	12414.1	0.60718	0.515213	FALSE	28.294	0.106894	0.999877	FALSE	865.176	0.752751	0.177435	FALSE
ENSG00000060303	RPS17P5	chr6:50824967-50825375	chr6:50822875-50827875	0	NA	NA	FALSE	0.412148	0.25546	NA	FALSE	7.55806	-0.259377	0.904428	FALSE	25.915	0.629403	0.51789	FALSE	1.83388	-0.130063	NA	FALSE	268.663	0.551901	0.464503	FALSE	9.29959	0.19514	NA	FALSE	8.14432	0.191729	NA	FALSE	2.61192	-0.035575	NA	FALSE	83.9073	0.293809	0.999877	FALSE	6.71802	-0.166971	NA	FALSE
ENSG00000060339	CCAR1	chr10:70480768-70552134	chr10:70478268-70483268	6365.19	-0.0607735	0.86446	FALSE	4536.66	-0.0129405	0.909605	FALSE	8557.26	0.0322543	0.967094	FALSE	75.9885	0.628409	0.468591	FALSE	2955.39	0.250788	0.0268901	FALSE	8.10578	0.963852	NA	FALSE	248.764	-0.294416	0.484146	FALSE	115.301	-0.0724543	0.999947	FALSE	4629.6	-0.0804915	0.999981	FALSE	14.4585	-0.18399	NA	FALSE	363.172	0.156626	0.978205	FALSE
ENSG00000060491	OGFR	chr20:61436186-61445352	chr20:61433686-61438686	5339.9	-0.241549	0.333243	FALSE	6359.66	-0.172731	0.177794	FALSE	2596.26	0.440373	0.0461171	FALSE	11.974	0.0713254	0.949906	FALSE	493.846	0.0114902	0.972593	FALSE	9.37043	0.4521	NA	FALSE	382.792	-0.75955	0.0392367	FALSE	24.9033	0.0837273	0.999947	FALSE	695.183	0.0859518	0.999981	FALSE	17.2816	0.131515	NA	FALSE	441.235	0.215067	0.972454	FALSE
ENSG00000060558	GNA15	chr19:3136190-3163767	chr19:3133690-3138690	4.13655	0.335449	0.781729	FALSE	5.80934	-1.26661	0.0770465	FALSE	8.70168	0.151566	0.958009	FALSE	155.867	-0.648103	0.290009	FALSE	203.547	0.206122	0.346182	FALSE	22.0877	-0.386232	0.627187	FALSE	26.9624	0.542444	0.379533	FALSE	71.04	0.263962	0.999947	FALSE	428.971	-0.0947617	0.999981	FALSE	12.0378	0.0123808	NA	FALSE	18.873	0.108067	0.986935	FALSE
ENSG00000060566	CREB3L3	chr19:4153597-4173051	chr19:4151097-4156097	1.98928	1.08614	0.463017	FALSE	0.91116	-1.27249	NA	FALSE	9.79594	2.51909	0.0599922	FALSE	817.862	0.0770684	0.883045	FALSE	27.8673	0.109115	0.776718	FALSE	157.725	-0.0830242	0.888137	FALSE	13.7592	0.0728072	NA	FALSE	550.852	-0.0745952	0.999947	FALSE	76.9054	0.0123249	0.999981	FALSE	115.141	0.194462	0.999877	FALSE	4.83032	0.0666628	NA	FALSE
ENSG00000060642	PIGV	chr1:27113962-27124889	chr1:27111462-27116462	1614.72	0.443246	0.00207132	FALSE	1307.4	0.379648	0.00640311	FALSE	1230.81	0.138889	0.730157	FALSE	16.6168	0.291213	0.765057	FALSE	317.635	0.196112	0.317973	FALSE	7.16188	0.266573	NA	FALSE	599.284	-0.380242	0.409106	FALSE	23.7534	-0.381355	0.999947	FALSE	503.298	-0.0257217	0.999981	FALSE	17.2104	-0.512724	NA	FALSE	789.739	-0.109364	0.986935	FALSE
ENSG00000060656	PTPRU	chr1:29563027-29653325	chr1:29560527-29565527	3481.98	1.03055	1.53019e-07	TRUE	7055.39	-0.294133	0.24448	FALSE	7660.86	0.0909283	0.920751	FALSE	298.329	0.353523	0.549519	FALSE	1747.1	0.074213	0.641443	FALSE	73.2929	0.00286912	0.997259	FALSE	177.127	-0.343138	0.525882	FALSE	158.433	0.055065	0.999947	FALSE	3656.96	-0.272088	0.999981	FALSE	30.4543	-0.31806	0.999877	FALSE	662.043	0.113649	0.986935	FALSE
ENSG00000060688	SNRNP40	chr1:31732416-31769662	chr1:31767162-31772162	3466.02	-0.225297	0.429471	FALSE	2800.15	0.109428	0.291811	FALSE	3974.64	0.0626656	0.89873	FALSE	40.9933	0.747538	0.346496	FALSE	1457.35	0.220783	0.0591134	FALSE	5.42178	0.134782	NA	FALSE	209.856	-0.0902911	0.864216	FALSE	53.3268	0.183946	0.999947	FALSE	1912.48	-0.0821595	0.999981	FALSE	12.9397	-0.0793242	NA	FALSE	261.975	0.152624	0.983767	FALSE
ENSG00000060709	RIMBP2	chr12:130880681-131200826	chr12:131198326-131203326	53.9445	1.13132	0.029098	TRUE	25.5427	0.231187	0.799465	FALSE	13.8181	4.1063	0.0294432	FALSE	19104.8	-0.551259	0.176444	FALSE	500.743	0.11194	0.723982	FALSE	256.646	-0.611824	0.190114	FALSE	25.8783	-0.0159398	0.984144	FALSE	3149.35	-0.307416	0.999947	FALSE	692.112	0.306536	0.999981	FALSE	151.769	-0.496102	0.999877	FALSE	4.06782	-0.0161213	NA	FALSE
ENSG00000060718	COL11A1	chr1:103342022-103574052	chr1:103571552-103576552	181.29	-2.2934	2.02481e-05	TRUE	38546.3	3.20679	0.00671501	TRUE	370.992	1.00135	0.722437	FALSE	753.628	0.642024	0.125036	FALSE	2246.64	-0.253342	0.173243	FALSE	13.4684	1.0714	NA	FALSE	90.5032	-1.47428	0.000750411	TRUE	601.59	-0.158389	0.999947	FALSE	9107.52	0.721882	0.186497	FALSE	11.7643	-0.00303693	NA	FALSE	219.812	0.490275	0.664989	FALSE
ENSG00000060749	QSER1	chr11:32914723-33014862	chr11:32912223-32917223	3613.48	0.43953	0.193101	FALSE	2625.36	-0.0352868	0.912492	FALSE	23660	-0.0563846	0.937711	FALSE	178.235	0.415613	0.541333	FALSE	2624.02	0.260901	0.0267221	FALSE	9.53313	0.274516	NA	FALSE	536.133	-0.290595	0.539577	FALSE	198.707	0.181109	0.999947	FALSE	4421.3	0.0285871	0.999981	FALSE	24.37	-0.136857	0.999877	FALSE	1012.51	0.111812	0.986935	FALSE
ENSG00000060762	MPC1	chr6:166778406-166796486	chr6:166793986-166798986	1104.86	-0.930145	1.64108e-05	FALSE	997.877	0.372893	2.41293e-05	FALSE	941.188	-0.241226	0.455175	FALSE	51.9636	0.224033	0.745011	FALSE	292.975	-0.182109	0.4111	FALSE	11.3536	0.229656	NA	FALSE	261.844	-0.756961	0.0375182	FALSE	76.7406	-0.0777597	0.999947	FALSE	501.235	0.0868126	0.999981	FALSE	24.9423	-0.201902	0.999877	FALSE	290.502	0.200264	0.977023	FALSE
ENSG00000060971	ACAA1	chr3:38144619-38178733	chr3:38176233-38181233	1981.23	-0.753979	0.00761577	FALSE	2514.34	0.0813058	0.779346	FALSE	1996.76	0.0689136	0.909802	FALSE	450.299	0.672188	0.129282	FALSE	859.46	0.0544215	0.797102	FALSE	5.95417	0.287949	NA	FALSE	341.345	-0.451589	0.217867	FALSE	211.618	0.152459	0.999947	FALSE	1024.54	-0.0689948	0.999981	FALSE	11.3875	-0.378999	NA	FALSE	385.685	0.191305	0.977023	FALSE
ENSG00000060982	BCAT1	chr12:24964294-25102393	chr12:25099893-25104893	30704.9	-0.533422	0.0362034	FALSE	28064.4	-0.310142	0.327196	FALSE	36934.7	-0.493129	8.48694e-06	FALSE	193.507	0.743534	0.344631	FALSE	3931.21	0.0284143	0.8846	FALSE	8.94931	0.724189	NA	FALSE	349.311	-0.822766	0.0262858	FALSE	388.316	0.463921	0.999947	FALSE	8538.16	0.231783	0.999981	FALSE	15.2261	0.180224	NA	FALSE	405.968	0.0632535	0.987606	FALSE
ENSG00000061273	HDAC7	chr12:48176504-48226915	chr12:48224415-48229415	7013.15	-0.0953511	0.644472	FALSE	5299.6	0.0333928	0.822294	FALSE	11439.3	-0.264376	0.465177	FALSE	82.4414	0.579088	0.503097	FALSE	1909.08	0.0992307	0.528148	FALSE	24.5265	0.580624	0.408946	FALSE	22.7228	0.518078	0.410951	FALSE	102.772	-0.0480309	0.999947	FALSE	2561.57	-0.0438231	0.999981	FALSE	22.4425	-0.17068	NA	FALSE	13.5465	0.121644	NA	FALSE
ENSG00000061337	LZTS1	chr8:20103675-20161474	chr8:20158974-20163974	63.3909	0.595062	0.34261	FALSE	587.836	-0.56132	0.169368	FALSE	1715.74	-0.575142	0.240864	FALSE	1241.83	0.61267	0.126619	FALSE	458.259	-0.384689	0.0186958	FALSE	114.656	1.37521	0.00228457	TRUE	19.0362	-0.0322281	0.968459	FALSE	205.369	0.500785	0.999947	FALSE	1116.24	-0.289872	0.999981	FALSE	34.5692	0.182168	0.999877	FALSE	90.8588	-0.0858669	0.986935	FALSE
ENSG00000061455	PRDM6	chr5:122424815-122529960	chr5:122422315-122427315	144.653	-2.60189	8.91462e-05	TRUE	50.2002	-0.443935	0.510813	FALSE	88.5602	-0.267118	0.902556	FALSE	1770.23	2.5171	5.6855e-15	TRUE	1292	-0.764035	0.00013255	TRUE	243.262	3.21498	7.20517e-15	TRUE	57.1317	-1.45042	0.000979536	TRUE	1048.87	-0.0177086	0.999947	FALSE	1652.89	0.0381751	0.999981	FALSE	230.226	-0.216557	0.999877	FALSE	30.9648	-0.00700169	0.999209	FALSE
ENSG00000061492	WNT8A	chr5:137419580-137428054	chr5:137417080-137422080	0.557931	2.44604	NA	FALSE	0.31336	0.25546	NA	FALSE	0.917744	-3.47373	NA	FALSE	181.749	0.184146	0.755468	FALSE	51.3934	-0.11828	0.746298	FALSE	25.6097	-0.134927	0.876155	FALSE	15.3506	0.68699	NA	FALSE	73.4187	-0.317112	0.999947	FALSE	86.1701	0.16263	0.999981	FALSE	14.629	-0.0982634	NA	FALSE	9.91494	0.240814	NA	FALSE
ENSG00000061656	SPAG4	chr20:34203813-34208971	chr20:34201313-34206313	146.865	1.58102	1.23114e-05	TRUE	92.8553	0.36004	0.322352	FALSE	40.1609	0.700773	0.448641	FALSE	7.63378	0.781957	0.434201	FALSE	74.5868	-0.175864	0.593191	FALSE	14.52	0.672179	0.393213	FALSE	248.524	-0.0985011	0.852005	FALSE	19.1375	-0.118042	0.999947	FALSE	131.852	0.068424	0.999981	FALSE	19.5302	-0.103571	NA	FALSE	272.026	0.465178	0.672676	FALSE
ENSG00000061676	NCKAP1	chr2:183773842-183903586	chr2:183901086-183906086	22105.7	-0.600819	0.0348612	FALSE	14928.6	-0.129392	0.616428	FALSE	31903.7	-0.0557253	0.912863	FALSE	166.982	0.795224	0.25428	FALSE	4181.21	0.242351	0.0692487	FALSE	28.4625	0.138249	0.876155	FALSE	551.274	-0.64601	0.0338031	FALSE	290.92	0.353318	0.999947	FALSE	8300.58	-0.0263601	0.999981	FALSE	18.4865	-0.149876	NA	FALSE	780.436	0.103866	0.986935	FALSE
ENSG00000061794	MRPS35	chr12:27863705-27909228	chr12:27861205-27866205	3214.65	-0.218355	0.435001	FALSE	3107.84	0.377346	5.68675e-05	FALSE	3429.4	0.11012	0.826939	FALSE	62.6694	0.694703	0.399224	FALSE	1557.03	0.202445	0.113649	FALSE	18.9815	0.00213874	0.998448	FALSE	218.793	-0.0471602	0.937151	FALSE	107.97	0.475796	0.999947	FALSE	3062.09	0.359437	0.999981	FALSE	21.3038	0.24163	NA	FALSE	251.062	0.443406	0.755107	FALSE
ENSG00000061918	GUCY1B3	chr4:156680143-156728743	chr4:156677643-156682643	92.6361	2.01558	1.85328e-07	TRUE	25.504	-1.4178	0.00224754	FALSE	448.346	-0.334138	0.470811	FALSE	275.013	-0.553371	0.318922	FALSE	441.248	0.118539	0.56508	FALSE	25.9085	-0.164031	0.859841	FALSE	20.4033	0.415734	0.523284	FALSE	399.998	0.0600962	0.999947	FALSE	641.018	0.233995	0.999981	FALSE	80.6859	-0.180261	0.999877	FALSE	11.634	0.216195	NA	FALSE
ENSG00000061936	SFSWAP	chr12:132195625-132284282	chr12:132193125-132198125	4012.79	0.520484	5.29851e-05	FALSE	3026.27	0.0424164	0.859926	FALSE	3708.56	0.0205045	0.97968	FALSE	116.895	0.52857	0.515918	FALSE	3808.67	0.246452	0.0144239	FALSE	32.9025	0.16151	0.847851	FALSE	341.14	-0.0983852	0.849164	FALSE	163.97	-0.00177477	0.999947	FALSE	5468.37	-0.0624553	0.999981	FALSE	20.7093	0.253618	NA	FALSE	452.649	-0.00566424	0.999209	FALSE
ENSG00000061938	TNK2	chr3:195590234-195638816	chr3:195636316-195641316	2213.66	0.146409	0.49092	FALSE	2373.57	-0.0492351	0.731771	FALSE	3038.45	0.180811	0.554311	FALSE	61.4008	0.446064	0.583579	FALSE	1374.34	-0.0257346	0.898847	FALSE	12.9212	0.604258	NA	FALSE	73.2464	-0.0759679	0.899737	FALSE	101.343	-0.118299	0.999947	FALSE	2037.69	0.0666965	0.999981	FALSE	11.8798	-0.097383	NA	FALSE	146.758	0.331612	0.931256	FALSE
ENSG00000061987	MON2	chr12:62860596-62991363	chr12:62858096-62863096	5302.12	-0.136103	0.646542	FALSE	4549.13	-0.36841	0.111687	FALSE	6432.32	-0.317874	0.00982757	FALSE	192.231	0.628358	0.365292	FALSE	3824.28	0.125947	0.293341	FALSE	27.0507	0.447598	0.555858	FALSE	215.736	-0.204328	0.70967	FALSE	290.505	0.196418	0.999947	FALSE	6822.08	-0.272881	0.999981	FALSE	41.0263	-0.475799	0.999877	FALSE	297.549	-0.137105	0.986935	FALSE
ENSG00000062038	CDH3	chr16:68670091-68756519	chr16:68667591-68672591	12.9954	-0.843142	0.120195	FALSE	19.2346	-1.06	0.00186688	FALSE	247.008	1.93472	0.0452521	TRUE	688.737	0.83852	0.0190709	FALSE	633.466	-0.369934	0.0581261	FALSE	14.2787	0.323837	NA	FALSE	55.1687	0.749711	0.141214	FALSE	547.667	0.0156925	0.999947	FALSE	1244.54	0.00576442	0.999981	FALSE	8.56962	0.071884	NA	FALSE	74.3252	-0.289216	0.960058	FALSE
ENSG00000062096	ARSF	chrX:2959511-3030767	chrX:2957011-2962011	0.081636	-0.47385	NA	FALSE	0.490385	-1.49807	NA	FALSE	0.132461	0.794476	NA	FALSE	2232.56	0.331827	0.483516	FALSE	68.2543	-0.293081	0.351132	FALSE	40.9435	1.19514	0.0346412	TRUE	5.33297	0.450061	NA	FALSE	923.22	-0.0521735	0.999947	FALSE	135.423	0.109361	0.999981	FALSE	38.1269	-0.167052	0.999877	FALSE	2.14123	0.0741355	NA	FALSE
ENSG00000062194	GPBP1	chr5:56469774-56560506	chr5:56467274-56472274	5211.31	-0.305386	0.0214323	FALSE	5257.14	-0.132604	0.20708	FALSE	5819.23	-0.145538	0.55005	FALSE	121.777	0.61099	0.427013	FALSE	2680.58	0.183361	0.14331	FALSE	7.69436	0.859477	NA	FALSE	657.708	-0.282695	0.588476	FALSE	150.829	0.240628	0.999947	FALSE	4609.12	-0.130964	0.999981	FALSE	16.5848	-0.235389	NA	FALSE	804.833	0.0869515	0.986935	FALSE
ENSG00000062282	DGAT2	chr11:75470556-75512579	chr11:75468056-75473056	121.454	1.66692	2.55287e-06	TRUE	131.856	-2.41678	2.89654e-21	TRUE	231.728	2.33811	0.114329	FALSE	707.469	-0.520459	0.31658	FALSE	398.516	-0.0181013	0.946779	FALSE	124.168	0.0791759	0.899245	FALSE	14.0337	0.828286	NA	FALSE	291.016	0.187752	0.999947	FALSE	650.347	-0.330772	0.999981	FALSE	46.9797	0.0853129	0.999877	FALSE	7.96303	0.0929758	NA	FALSE
ENSG00000062370	ZNF112	chr19:44830707-44871377	chr19:44868877-44873877	1183.44	0.297937	0.0165067	FALSE	890.629	0.238405	0.280754	FALSE	398.204	-0.410881	0.227538	FALSE	309.369	-0.162887	0.811192	FALSE	869.941	-0.084295	0.664337	FALSE	96.2386	-0.15148	0.824766	FALSE	15.9072	0.182966	NA	FALSE	165.174	0.108637	0.999947	FALSE	1177.51	-0.165609	0.999981	FALSE	39.7887	0.128864	0.999877	FALSE	13.2755	0.0649543	NA	FALSE
ENSG00000062485	CS	chr12:56665482-56694176	chr12:56691676-56696676	8003.25	0.0748888	0.89548	FALSE	3654.26	0.0838343	0.833941	FALSE	24482.3	-0.0276554	0.957399	FALSE	31.2417	0.533281	0.533303	FALSE	1016.8	0.177838	0.174789	FALSE	8.02219	0.630915	NA	FALSE	213.763	-0.438612	0.241964	FALSE	37.7311	0.0561349	0.999947	FALSE	1443.2	-0.13333	0.999981	FALSE	10.9579	-0.27041	NA	FALSE	278.926	0.25679	0.956001	FALSE
ENSG00000062524	LTK	chr15:41795835-41806085	chr15:41803585-41808585	1065.88	-0.402467	0.311233	FALSE	606.247	1.64302	0.00238763	TRUE	25.6568	0.359012	0.880932	FALSE	44.7523	0.0380014	0.965107	FALSE	154.966	-0.125715	0.692566	FALSE	13.1933	0.088076	NA	FALSE	35.072	0.0622848	0.936147	FALSE	21.8925	0.0566147	0.999947	FALSE	250.061	0.267279	0.999981	FALSE	15.8772	-0.0175127	NA	FALSE	23.7282	0.754371	0.27996	FALSE
ENSG00000062582	MRPS24	chr7:43906156-43909492	chr7:43906992-43911992	3239.67	-0.929447	2.68538e-05	FALSE	5717.55	0.352326	0.107349	FALSE	5343.59	-0.0517686	0.934892	FALSE	6.29473	-0.0304617	0.979087	FALSE	91.7126	0.174847	0.576621	FALSE	10.4875	0.265108	NA	FALSE	458.05	-0.703534	0.0873133	FALSE	10.4899	-0.262171	NA	FALSE	219.697	0.171137	0.999981	FALSE	20.3523	-0.4214	NA	FALSE	626.898	0.136479	0.986171	FALSE
ENSG00000062598	ELMO2	chr20:44994687-45061704	chr20:45059204-45064204	3742.93	-0.404912	0.141976	FALSE	2393.73	-0.152129	0.251401	FALSE	6939	0.253193	0.599332	FALSE	2774.2	0.0308503	0.95459	FALSE	1825.27	-0.136024	0.406011	FALSE	628.715	0.0396459	0.939691	FALSE	14.488	0.327093	NA	FALSE	899.537	0.0129364	0.999947	FALSE	1967.46	-0.210325	0.999981	FALSE	178.819	0.0960011	0.999877	FALSE	9.42274	-0.00152088	NA	FALSE
ENSG00000062650	WAPAL	chr10:88195012-88281572	chr10:88279072-88284072	8419.31	-0.268039	0.0262878	FALSE	8313.91	-0.00181567	0.991514	FALSE	9878.5	-0.116821	0.719324	FALSE	105.38	0.594151	0.477781	FALSE	3198.57	0.253642	0.0105022	FALSE	8.18359	0.878312	NA	FALSE	352.805	-0.334373	0.404803	FALSE	153.992	0.0920437	0.999947	FALSE	5168.84	-0.11937	0.999981	FALSE	15.2892	-0.131465	NA	FALSE	577.896	0.278891	0.929716	FALSE
ENSG00000062716	VMP1	chr17:57784552-57919616	chr17:57782052-57787052	32415.8	1.24586	1.38438e-05	TRUE	27242.4	-0.576511	0.00113533	FALSE	12187.4	0.0676608	0.898274	FALSE	172.328	0.611035	0.416228	FALSE	2988.4	0.327201	0.00300685	FALSE	5.52682	0.810056	NA	FALSE	302.002	0.0681327	0.911753	FALSE	311.782	-0.135271	0.999947	FALSE	6247.4	-0.00713121	0.999981	FALSE	14.2269	-0.344655	NA	FALSE	247.644	-0.129984	0.986935	FALSE
ENSG00000062725	APPBP2	chr17:58520519-58603580	chr17:58601080-58606080	5858.19	-0.662648	8.84177e-05	FALSE	4408.15	-0.0602426	0.58056	FALSE	3798.44	-0.144069	0.670221	FALSE	102.523	0.572545	0.444704	FALSE	2547.32	0.116274	0.347924	FALSE	9.31124	0.553065	NA	FALSE	396.044	-0.601606	0.118827	FALSE	151.696	0.0887675	0.999947	FALSE	4182.53	-0.0908579	0.999981	FALSE	17.9448	-0.224216	NA	FALSE	425.842	0.0453726	0.99047	FALSE
ENSG00000062822	POLD1	chr19:50887460-50921273	chr19:50884960-50889960	3394.96	0.140495	0.781578	FALSE	4573.48	0.159819	0.153549	FALSE	2871.33	-0.0794033	0.93243	FALSE	43.6003	0.0811907	0.940179	FALSE	1027.2	0.122812	0.446329	FALSE	8.6581	0.64887	NA	FALSE	188.057	-0.332246	0.478813	FALSE	42.0959	0.0204857	0.999947	FALSE	1166.39	-0.0136062	0.999981	FALSE	9.76999	-0.20723	NA	FALSE	197.819	0.0983312	0.986935	FALSE
ENSG00000063015	SEZ6	chr17:27281918-27333458	chr17:27330958-27335958	40.5919	0.02242	0.975303	FALSE	32.5529	-0.467325	0.116717	FALSE	20.079	0.957403	0.375139	FALSE	1771.53	0.404573	0.413987	FALSE	346.086	-0.532713	0.020003	FALSE	435.957	-0.177858	0.751969	FALSE	17.7575	0.467263	0.491765	FALSE	996.649	-0.0337829	0.999947	FALSE	543.352	-0.259015	0.999981	FALSE	368.135	-0.531796	0.999877	FALSE	10.0157	-0.0227052	NA	FALSE
ENSG00000063046	EIF4B	chr12:53399941-53435993	chr12:53397441-53402441	45636.3	0.459869	0.0750409	FALSE	44730.2	0.108458	0.578019	FALSE	39854	-0.169	0.731699	FALSE	39.8847	0.607259	0.506198	FALSE	1412.24	0.385949	0.00286113	FALSE	7.1186	0.607907	NA	FALSE	336.893	-0.378973	0.366027	FALSE	63.4724	-0.0047349	0.999947	FALSE	2361.88	-0.11222	0.999981	FALSE	15.0937	-0.106121	NA	FALSE	391.087	-0.0940667	0.986935	FALSE
ENSG00000063127	SLC6A16	chr19:49792894-49828482	chr19:49825982-49830982	147.765	2.0003	1.93946e-06	TRUE	86.914	0.172171	0.816521	FALSE	122.187	-1.58178	0.0117246	TRUE	339.113	-0.60774	0.396695	FALSE	491.53	0.152306	0.492653	FALSE	33.5312	-0.50742	0.523486	FALSE	13.0154	0.462148	NA	FALSE	260.24	-0.0911974	0.999947	FALSE	751.054	-0.0457114	0.999981	FALSE	37.4002	0.0586125	0.999877	FALSE	8.93562	0.420285	NA	FALSE
ENSG00000063169	GLTSCR1	chr19:48111452-48206533	chr19:48108952-48113952	138.268	0.0903897	0.85837	FALSE	156.951	0.101015	0.661016	FALSE	3386.81	-0.297817	0.220408	FALSE	128.71	0.216255	0.814679	FALSE	2916.14	-0.0822697	0.542603	FALSE	10.943	0.143548	NA	FALSE	612.339	-0.734599	0.0589879	FALSE	143.883	-0.030425	0.999947	FALSE	3833.4	-0.0539721	0.999981	FALSE	19.1371	-0.241891	NA	FALSE	860.733	0.29313	0.912614	FALSE
ENSG00000063176	SPHK2	chr19:49122547-49133974	chr19:49120047-49125047	1252.22	0.314262	0.0656803	FALSE	1146.41	0.0335615	0.899748	FALSE	2279.74	0.345867	0.088561	FALSE	13.947	-0.0271384	0.981258	FALSE	369.845	0.202884	0.280801	FALSE	7.97356	0.628504	NA	FALSE	382.353	-0.268532	0.633075	FALSE	18.2937	-0.0697793	0.999947	FALSE	525.083	0.0460624	0.999981	FALSE	12.6053	-0.270948	NA	FALSE	302.522	-0.0103198	0.999209	FALSE
ENSG00000063177	RPL18	chr19:49118584-49122793	chr19:49120293-49125293	24440.2	0.466992	0.208588	FALSE	21204.6	0.379783	0.015591	FALSE	7885.78	0.0920691	0.911482	FALSE	7.27766	0.558142	0.574908	FALSE	213.033	0.2674	0.241257	FALSE	7.77962	0.587374	NA	FALSE	376.899	-0.272372	0.628073	FALSE	12.903	-0.126697	0.999947	FALSE	349.753	0.138613	0.999981	FALSE	12.0449	-0.227891	NA	FALSE	301.408	-0.0115218	0.998828	FALSE
ENSG00000063180	CA11	chr19:49141198-49149569	chr19:49147069-49152069	277.993	1.31253	0.00142454	TRUE	314.981	0.0375111	0.98245	FALSE	307.288	-0.301785	0.71666	FALSE	84.4504	-0.172446	0.806264	FALSE	44.4909	0.0689418	0.857486	FALSE	16.7258	0.252616	0.777302	FALSE	151.127	-0.511653	0.209514	FALSE	35.0087	-0.0866989	0.999947	FALSE	118.908	-0.0320015	0.999981	FALSE	18.0998	-0.190569	NA	FALSE	241.251	0.128334	0.986935	FALSE
ENSG00000063241	ISOC2	chr19:55964351-55973710	chr19:55971210-55976210	1989.54	-0.417295	0.172186	FALSE	1884.51	0.328825	0.00726836	FALSE	1946.7	0.30279	0.552718	FALSE	20.7083	-0.229599	0.812035	FALSE	236.687	0.0672202	0.779831	FALSE	24.5471	-0.597275	0.414836	FALSE	156.177	-0.202081	0.692336	FALSE	24.4926	-0.333615	0.999947	FALSE	262.419	0.100309	0.999981	FALSE	21.9804	-0.234466	NA	FALSE	157.383	0.182581	0.977409	FALSE
ENSG00000063244	U2AF2	chr19:56165511-56186081	chr19:56163011-56168011	11489.1	0.0788036	0.806992	FALSE	10482.8	-0.0274693	0.847015	FALSE	20044.3	0.330437	0.231519	FALSE	30.2722	0.102397	0.923135	FALSE	1036.44	0.290962	0.0433688	FALSE	8.90008	-0.270247	NA	FALSE	757.551	-0.112264	0.833471	FALSE	37.5769	-0.32046	0.999947	FALSE	1244.48	-0.0366691	0.999981	FALSE	16.6518	-0.193104	NA	FALSE	885.045	0.108105	0.986935	FALSE
ENSG00000063245	EPN1	chr19:56186591-56221224	chr19:56184091-56189091	5207.93	0.24199	0.56961	FALSE	3070.5	0.0261342	0.926447	FALSE	12729.4	-0.166422	0.700069	FALSE	185.983	-0.410966	0.553417	FALSE	1470	0.138487	0.264151	FALSE	11.0565	0.24647	NA	FALSE	262.086	-0.363188	0.412736	FALSE	79.8143	0.11846	0.999947	FALSE	1628.15	0.108089	0.999981	FALSE	14.1542	-0.326486	NA	FALSE	322.827	0.323744	0.910802	FALSE
ENSG00000063322	MED29	chr19:39881942-39891277	chr19:39879442-39884442	2368.81	-0.0681358	0.827813	FALSE	1796.77	0.0284494	0.830266	FALSE	4182.91	0.0123846	0.98356	FALSE	14.8023	0.372832	0.706606	FALSE	272.823	0.202401	0.343038	FALSE	7.8222	0.699813	NA	FALSE	409.402	-0.381958	0.404833	FALSE	16.0763	-0.0861008	0.999947	FALSE	444.779	-0.0210792	0.999981	FALSE	10.4048	-0.123683	NA	FALSE	423.096	0.160032	0.977409	FALSE
ENSG00000063438	AHRR	chr5:304290-438406	chr5:301790-306790	1302.12	0.589103	0.0359434	FALSE	1057.51	0.336172	0.343049	FALSE	1023.49	-0.113216	0.780398	FALSE	880.187	-1.52167	0.000766556	TRUE	2361.81	0.326365	0.0932435	FALSE	4.97929	0.666995	NA	FALSE	9.36707	-0.0858637	NA	FALSE	1303.2	-0.0615839	0.999947	FALSE	3288.33	0.124764	0.999981	FALSE	4.22908	-0.132056	NA	FALSE	2.7016	0.157221	NA	FALSE
ENSG00000063515	GSC2	chr22:19136088-19137796	chr22:19135296-19140296	0	NA	NA	FALSE	0.278721	1.74836	NA	FALSE	0	NA	NA	FALSE	385.39	0.287496	0.610707	FALSE	2.22026	-0.0643626	NA	FALSE	861.924	0.260097	0.570351	FALSE	16.2493	-0.259831	NA	FALSE	266.284	-0.516846	0.999947	FALSE	8.69552	0.00414818	NA	FALSE	499.188	-0.376097	0.999877	FALSE	9.46417	0.146653	NA	FALSE
ENSG00000063587	ZNF275	chrX:152599612-152625568	chrX:152597112-152602112	869.866	-0.343932	0.206627	FALSE	676.268	-0.0603094	0.883317	FALSE	3204.15	0.0844503	0.944332	FALSE	84.1892	0.63754	0.27277	FALSE	390.959	0.0387817	0.868742	FALSE	47.1119	0.462962	0.499505	FALSE	92.2993	-0.106001	0.848777	FALSE	37.5759	0.34452	0.999947	FALSE	526.476	-0.140273	0.999981	FALSE	15.691	0.0521291	NA	FALSE	125.653	0.0763104	0.98711	FALSE
ENSG00000063601	MTMR1	chrX:149861434-149933576	chrX:149858934-149863934	2640.24	-0.507771	0.00329399	FALSE	2279.61	0.155624	0.0823203	FALSE	3656.96	-0.207208	0.684064	FALSE	52.0054	0.516942	0.527026	FALSE	1210.94	0.0726929	0.667403	FALSE	3.87804	0.395103	NA	FALSE	175.001	-0.200711	0.744526	FALSE	66.2114	0.154192	0.999947	FALSE	1760.46	-0.0480361	0.999981	FALSE	12.1446	-0.22113	NA	FALSE	371.792	0.202603	0.977023	FALSE
ENSG00000063660	GPC1	chr2:241375087-241407493	chr2:241372587-241377587	23257.4	-0.346208	0.456308	FALSE	33588.4	-0.0172177	0.928325	FALSE	52894.7	-0.438106	0.229317	FALSE	42.5237	0.833395	0.314112	FALSE	1040.53	-0.338858	0.0395708	FALSE	13.0381	1.16871	NA	FALSE	551.756	-0.165835	0.742803	FALSE	64.366	-0.0682466	0.999947	FALSE	1676.81	0.143902	0.999981	FALSE	30.045	-0.354536	0.999877	FALSE	1433.29	0.185544	0.977023	FALSE
ENSG00000063761	ADCK1	chr14:78266425-78401355	chr14:78263925-78268925	529.468	0.17893	0.495346	FALSE	417.023	-0.0941391	0.732408	FALSE	825.191	-0.083242	0.788782	FALSE	325.897	0.330602	0.538272	FALSE	2450.53	-0.256188	0.0746106	FALSE	9.53287	0.926499	NA	FALSE	177.262	-0.449894	0.230934	FALSE	329.2	0.0714138	0.999947	FALSE	2665.67	-0.338693	0.999981	FALSE	11.1223	0.0272951	NA	FALSE	248.246	0.00368535	0.999545	FALSE
ENSG00000063854	HAGH	chr16:1845620-1877195	chr16:1874695-1879695	2154.54	-1.48999	7.64968e-10	TRUE	2370.55	0.161461	0.557418	FALSE	1003.34	0.155761	0.781991	FALSE	53.787	0.115897	0.880614	FALSE	790.305	-0.0293311	0.918628	FALSE	8.17251	0.274359	NA	FALSE	264.345	-0.678144	0.0584117	FALSE	64.7681	0.163729	0.999947	FALSE	1014.76	0.0535365	0.999981	FALSE	14.0654	-0.263841	NA	FALSE	470.385	0.380906	0.83717	FALSE
ENSG00000063978	RNF4	chr4:2463946-2627047	chr4:2461446-2466446	5601.26	-0.186682	0.542742	FALSE	4416.52	-0.126195	0.230682	FALSE	11694.1	-0.0599889	0.883112	FALSE	239.301	0.567718	0.410918	FALSE	4113.68	0.136182	0.252655	FALSE	48.6616	0.0161542	0.984521	FALSE	46.402	-0.278515	0.642132	FALSE	261.771	-0.140097	0.999947	FALSE	5489.85	-0.113808	0.999981	FALSE	77.303	-0.952232	0.400902	FALSE	49.4403	0.640981	0.504655	FALSE
ENSG00000064012	CASP8	chr2:202098165-202152434	chr2:202095665-202100665	2724.72	0.382567	0.0596745	FALSE	3078.26	0.0147992	0.956329	FALSE	2784.85	0.0114185	0.994162	FALSE	87.8393	0.335982	0.645221	FALSE	1293.59	0.214752	0.117829	FALSE	9.22669	0.367412	NA	FALSE	165.603	-0.419443	0.411579	FALSE	112.447	-0.058549	0.999947	FALSE	2429.12	0.00353445	0.999981	FALSE	13.2122	0.019266	NA	FALSE	154.171	0.0739928	0.987535	FALSE
ENSG00000064042	LIMCH1	chr4:41361623-41702061	chr4:41359123-41364123	7174.87	-3.61407	0.00364523	TRUE	2591.37	-1.1167	0.483595	FALSE	4305.88	-0.866942	0.1521	FALSE	9435.56	4.34744	1.31031e-23	TRUE	4994.51	-0.408479	0.0654562	FALSE	70.7221	3.43751	4.00186e-13	TRUE	232.685	-2.77756	2.5972e-14	TRUE	3333.55	0.854314	0.627516	FALSE	7235.82	-0.154625	0.999981	FALSE	59.4276	0.531974	0.999877	FALSE	130.243	-0.108553	0.986935	FALSE
ENSG00000064102	ASUN	chr12:27058113-27091259	chr12:27088759-27093759	2502.17	-0.0839997	0.710991	FALSE	2166.88	0.397146	0.0546036	FALSE	3130.36	0.294599	0.313491	FALSE	42.5698	0.486716	0.568068	FALSE	1152.86	0.20747	0.172409	FALSE	6.9263	0.846052	NA	FALSE	418.11	-0.142193	0.768393	FALSE	82.0297	0.547939	0.999947	FALSE	2355.32	0.40896	0.999981	FALSE	21.5939	-0.0357654	NA	FALSE	588.353	0.459382	0.769688	FALSE
ENSG00000064115	TM7SF3	chr12:27126127-27167367	chr12:27164867-27169867	7976.25	-0.0815008	0.823838	FALSE	11457.8	0.640688	0.000348593	FALSE	15085.3	-0.426873	0.283106	FALSE	54.3478	0.390997	0.62736	FALSE	1179.11	0.186964	0.172393	FALSE	7.09592	0.879505	NA	FALSE	227.443	0.311765	0.478347	FALSE	111.144	0.384886	0.999947	FALSE	2980.21	0.551951	0.653785	FALSE	17.7526	0.0954566	NA	FALSE	490.977	0.649652	0.368757	FALSE
ENSG00000064195	DLX3	chr17:48067368-48072588	chr17:48070088-48075088	441.542	2.22314	6.4823e-07	TRUE	36.816	-0.854404	0.00352788	FALSE	300.739	0.0977009	0.932615	FALSE	16.1906	-0.690048	0.449734	FALSE	125.261	0.545866	0.0536183	FALSE	17.3817	-0.370064	0.680279	FALSE	158.077	0.111697	0.824088	FALSE	126.229	0.146652	0.999947	FALSE	95.9318	-0.135743	0.999981	FALSE	133.44	0.0119073	0.999877	FALSE	161.337	-0.254126	0.969338	FALSE
ENSG00000064199	SPA17	chr11:124543693-124567414	chr11:124541193-124546193	786.837	0.063954	0.897903	FALSE	573.353	0.161457	0.504919	FALSE	893.352	-0.159333	0.936244	FALSE	99.0376	0.0485342	0.949949	FALSE	373.161	0.350443	0.0848668	FALSE	8.87584	0.0612007	NA	FALSE	335.78	0.198051	0.690647	FALSE	171.17	0.215621	0.999947	FALSE	500.015	-0.109591	0.999981	FALSE	20.6135	-0.165801	NA	FALSE	259.11	-0.13851	0.986935	FALSE
ENSG00000064201	TSPAN32	chr11:2323226-2339430	chr11:2320726-2325726	980.185	3.27648	5.43304e-16	TRUE	208.703	0.537705	0.277697	FALSE	5.74383	-2.10018	0.361757	FALSE	70.8664	-0.756768	0.226532	FALSE	265.481	0.604982	0.0031978	TRUE	12.7644	-1.13487	NA	FALSE	97.5397	0.603549	0.231084	FALSE	140.293	0.174039	0.999947	FALSE	224.262	0.185713	0.999981	FALSE	37.8533	0.307391	0.999877	FALSE	51.496	0.257516	0.977023	FALSE
ENSG00000064205	WISP2	chr20:43343484-43357150	chr20:43340984-43345984	495.223	5.48467	2.43259e-15	TRUE	345.144	0.462126	0.722873	FALSE	43.7076	0.951639	0.283361	FALSE	69.969	-0.586147	0.388138	FALSE	234.979	0.197902	0.442485	FALSE	91.9013	-1.55384	0.000811329	TRUE	41.4386	-0.0673097	0.920838	FALSE	36.6274	-0.274839	0.999947	FALSE	383.763	-0.21429	0.999981	FALSE	27.3148	-0.317632	0.999877	FALSE	37.0426	0.208567	0.977409	FALSE
ENSG00000064218	DMRT3	chr9:976963-991731	chr9:974463-979463	0.622066	-1.5503	NA	FALSE	0.868344	-0.631706	NA	FALSE	7.28147	0.605986	0.868497	FALSE	316.086	0.500416	0.457813	FALSE	114.384	-0.112102	0.726358	FALSE	145.382	0.478061	0.368572	FALSE	15.4259	0.139539	NA	FALSE	136.48	-0.286783	0.999947	FALSE	244.443	0.105808	0.999981	FALSE	82.9584	-0.00505983	0.999877	FALSE	8.5531	0.0556141	NA	FALSE
ENSG00000064225	ST3GAL6	chr3:98451079-98540045	chr3:98448579-98453579	2554.94	0.950283	3.16464e-06	FALSE	2536.29	0.011284	0.974333	FALSE	3958.68	0.359334	0.251522	FALSE	156.038	0.253242	0.756539	FALSE	2493.48	0.480256	3.15828e-06	FALSE	8.98914	-0.0832658	NA	FALSE	198.726	0.19881	0.699151	FALSE	195.864	0.312696	0.999947	FALSE	5531.53	-0.0338025	0.999981	FALSE	12.632	0.146806	NA	FALSE	475.25	0.100157	0.986935	FALSE
ENSG00000064270	ATP2C2	chr16:84402132-84497793	chr16:84399632-84404632	109.593	1.06322	0.00479238	TRUE	122.858	0.201273	0.614551	FALSE	256.84	0.360082	0.694898	FALSE	4048.1	0.374689	0.450681	FALSE	645.11	-0.320262	0.0759979	FALSE	427.606	0.065356	0.900922	FALSE	15.2903	-0.14247	NA	FALSE	2543	-0.0715535	0.999947	FALSE	1126.84	-0.0775769	0.999981	FALSE	287.771	-0.241857	0.999877	FALSE	8.70445	0.138849	NA	FALSE
ENSG00000064300	NGFR	chr17:47572654-47592379	chr17:47570154-47575154	28.3205	0.157232	0.766003	FALSE	18.8188	-1.57245	0.00016468	FALSE	40.8418	0.615812	0.698704	FALSE	820.332	-0.0156618	0.978785	FALSE	95.6747	-0.290242	0.340362	FALSE	300.746	-0.0675516	0.921224	FALSE	26.1845	-0.146078	0.85145	FALSE	599.277	-0.0790593	0.999947	FALSE	195.073	0.12645	0.999981	FALSE	317.621	-0.310981	0.999877	FALSE	24.9079	0.18556	0.980381	FALSE
ENSG00000064309	CDON	chr11:125825690-125933230	chr11:125930730-125935730	1243.89	0.724806	0.012308	FALSE	310.888	-0.874814	0.00014005	FALSE	2193.34	-0.392941	0.385263	FALSE	759.992	-1.08791	0.00360063	TRUE	1671.32	0.503584	0.0208042	FALSE	63.7943	-0.710352	0.148005	FALSE	191.3	0.139163	0.77682	FALSE	2396.88	0.102097	0.999947	FALSE	1246.1	-0.356907	0.999981	FALSE	141.516	0.139894	0.999877	FALSE	171.7	-0.112773	0.986935	FALSE
ENSG00000064313	TAF2	chr8:120743014-120845103	chr8:120842603-120847603	5479.51	-0.213484	0.304514	FALSE	3442.87	0.0895395	0.483918	FALSE	5674.23	-0.261861	0.0514794	FALSE	125.42	0.547415	0.491739	FALSE	3489.11	0.155976	0.191335	FALSE	6.40445	0.585024	NA	FALSE	224.435	-0.240655	0.613197	FALSE	153.498	0.170011	0.999947	FALSE	4933.58	-0.103982	0.999981	FALSE	11.4675	0.0947007	NA	FALSE	196.181	-0.342927	0.905111	FALSE
ENSG00000064393	HIPK2	chr7:139246315-139477577	chr7:139475077-139480077	2811.72	0.0455399	0.916838	FALSE	1823.02	-0.66786	0.0081626	FALSE	23279.6	-0.139581	0.780502	FALSE	304.793	0.412949	0.603242	FALSE	6016.6	0.0285708	0.850709	FALSE	17.1854	0.145151	0.888768	FALSE	373.094	-0.537338	0.220928	FALSE	294.13	-0.172194	0.999947	FALSE	7594.25	-0.353958	0.999981	FALSE	17.9108	-0.667471	NA	FALSE	530.551	-0.135567	0.986935	FALSE
ENSG00000064419	TNPO3	chr7:128594947-128695198	chr7:128692698-128697698	5221.12	-0.227881	0.199332	FALSE	5190.62	-0.313811	0.000488324	FALSE	8918.51	0.00808335	0.987623	FALSE	127.606	0.714179	0.338653	FALSE	3484.67	0.198928	0.0661915	FALSE	25.0234	0.0892336	0.922584	FALSE	279.51	-0.131916	0.778912	FALSE	156.317	0.0416961	0.999947	FALSE	4784.63	-0.191666	0.999981	FALSE	22.6988	-0.539797	NA	FALSE	284.905	-0.194419	0.977409	FALSE
ENSG00000064489	MEF2BNB-MEF2B	chr19:19256375-19302967	chr19:19300467-19305467	666.263	-0.380275	0.10848	FALSE	803.599	0.301888	0.000149489	FALSE	937.562	0.058292	0.927922	FALSE	68.5009	0.177637	0.826358	FALSE	1046.13	-0.0517243	0.767233	FALSE	6.08885	0.107726	NA	FALSE	280.851	-0.371858	0.294671	FALSE	73.5153	0.125846	0.999947	FALSE	1367.88	-0.0670634	0.999981	FALSE	9.93364	0.0526061	NA	FALSE	341.211	0.0808632	0.986935	FALSE
ENSG00000064490	RFXANK	chr19:19303007-19312678	chr19:19300507-19305507	2260.19	-0.159866	0.394123	FALSE	2158.33	0.264845	0.142813	FALSE	1413.89	0.0436644	0.962787	FALSE	9.49455	0.269878	0.789242	FALSE	299.998	0.0604723	0.787933	FALSE	6.08885	0.107726	NA	FALSE	280.851	-0.371858	0.294671	FALSE	13.6036	-0.0319376	0.999947	FALSE	370.365	0.0842557	0.999981	FALSE	9.93364	0.0526061	NA	FALSE	341.211	0.0808632	0.986935	FALSE
ENSG00000064545	TMEM161A	chr19:19229977-19249322	chr19:19246822-19251822	1331.09	0.128476	0.76801	FALSE	854.011	0.105864	0.427486	FALSE	653.658	-0.0655851	0.95867	FALSE	37.0932	0.517797	0.528867	FALSE	322.092	0.045646	0.857267	FALSE	34.9531	0.398191	0.547691	FALSE	104.477	0.147644	0.786849	FALSE	44.4969	-0.0319922	0.999947	FALSE	338.464	0.0527657	0.999981	FALSE	26.3734	-0.110983	0.999877	FALSE	86.4558	0.0663612	0.988276	FALSE
ENSG00000064547	LPAR2	chr19:19734476-19739739	chr19:19737239-19742239	225.364	0.460416	0.161354	FALSE	159.208	-0.130083	0.855838	FALSE	309.818	-0.723111	0.492205	FALSE	13.1104	1.12117	0.163343	FALSE	77.4101	-0.35836	0.223253	FALSE	11.1666	1.24305	NA	FALSE	16.2013	0.558155	NA	FALSE	13.9706	0.0826832	0.999947	FALSE	114.282	-0.125779	0.999981	FALSE	13.6622	0.265425	NA	FALSE	13.1931	0.561415	NA	FALSE
ENSG00000064601	CTSA	chr20:44518782-44527459	chr20:44516282-44521282	15880.8	0.662576	0.0179646	FALSE	16595.5	-0.778621	2.62789e-08	FALSE	39622.9	0.445633	0.394618	FALSE	11.9013	0.322297	0.746364	FALSE	351.053	0.144151	0.489862	FALSE	5.86598	0.430872	NA	FALSE	255.431	-0.175896	0.66964	FALSE	22.6222	-0.126932	0.999947	FALSE	507.98	-0.206826	0.999981	FALSE	11.5046	-0.225376	NA	FALSE	408.333	0.239226	0.972084	FALSE
ENSG00000064607	SUGP2	chr19:19101696-19144832	chr19:19142332-19147332	7776.76	-0.107918	0.722433	FALSE	7772.74	-0.151373	0.164553	FALSE	9968.84	-0.235728	0.272685	FALSE	50.4505	0.644262	0.422826	FALSE	1857.11	0.270509	0.0201286	FALSE	7.41605	0.511392	NA	FALSE	263.465	-0.340756	0.400337	FALSE	60.395	0.0105523	0.999947	FALSE	2560.16	-0.0919132	0.999981	FALSE	14.0599	-0.213749	NA	FALSE	520.928	0.19494	0.977023	FALSE
ENSG00000064651	SLC12A2	chr5:127419457-127525380	chr5:127416957-127421957	8434.9	-0.390094	0.213615	FALSE	4699.62	-0.289259	0.413253	FALSE	5761.47	-0.47778	0.131992	FALSE	166.327	0.505553	0.492973	FALSE	2543.26	0.00876052	0.952375	FALSE	5.96189	0.602591	NA	FALSE	389	-0.176744	0.714825	FALSE	222.067	0.181709	0.999947	FALSE	3768.01	-0.0419318	0.999981	FALSE	15.9692	-0.559895	NA	FALSE	605.389	0.153914	0.977906	FALSE
ENSG00000064652	SNX24	chr5:122179133-122365049	chr5:122176633-122181633	2402.43	-1.3687	9.52182e-12	TRUE	2094.34	0.00521826	0.989667	FALSE	3313.52	-0.421591	0.098062	FALSE	278.43	0.6314	0.380801	FALSE	3881.84	-0.366484	0.000409397	FALSE	10.9389	0.512597	NA	FALSE	239.271	-1.0453	0.000463968	TRUE	281.757	0.228965	0.999947	FALSE	6218.44	-0.17826	0.999981	FALSE	18.7202	-0.399914	NA	FALSE	450.43	0.0264052	0.995551	FALSE
ENSG00000064655	EYA2	chr20:45523262-45817492	chr20:45520762-45525762	70.1736	-2.44831	0.0614324	FALSE	279.986	1.27168	0.0248165	TRUE	421.454	0.944269	0.811537	FALSE	7676.21	0.887482	0.0763813	FALSE	2775.6	-0.629738	0.0339181	TRUE	296.507	1.10904	0.0330214	TRUE	26.4683	-0.664488	0.268094	FALSE	2210.64	-0.75787	0.785968	FALSE	3664.44	-0.0572491	0.999981	FALSE	113.051	-1.37622	0.0364884	TRUE	77.2619	0.686662	0.379913	FALSE
ENSG00000064666	CNN2	chr19:1026297-1039068	chr19:1023797-1028797	28800.9	-0.869182	0.000901558	FALSE	16668.3	-0.236525	0.142854	FALSE	40935.6	-0.329381	0.186775	FALSE	17.7144	0.534793	0.57121	FALSE	419.791	0.318252	0.0755476	FALSE	7.59787	0.749808	NA	FALSE	625.229	-0.378215	0.416848	FALSE	29.8049	-0.372908	0.999947	FALSE	731.848	0.104684	0.999981	FALSE	15.9094	-0.205529	NA	FALSE	717.76	0.263314	0.94206	FALSE
ENSG00000064687	ABCA7	chr19:1040101-1065571	chr19:1037601-1042601	3622.57	0.867277	0.00786903	FALSE	3432.5	0.304408	0.666475	FALSE	1809.87	-0.120954	0.857324	FALSE	42.7198	0.940405	0.197682	FALSE	533.677	0.155533	0.608166	FALSE	11.4674	0.619438	NA	FALSE	205.776	-1.08768	0.00116021	TRUE	47.7826	0.0461527	0.999947	FALSE	1105.59	0.208523	0.999981	FALSE	12.3968	-0.455895	NA	FALSE	153.883	0.0359714	0.995382	FALSE
ENSG00000064692	SNCAIP	chr5:121647048-121799914	chr5:121644548-121649548	70.0505	1.73008	0.00138721	TRUE	537.545	0.06142	0.94481	FALSE	198.712	0.13865	0.980505	FALSE	4856.61	-1.41172	0.000887423	TRUE	808.441	0.329439	0.250321	FALSE	236.309	-1.94844	7.92703e-06	TRUE	34.1823	0.557503	0.365092	FALSE	800.523	-0.952998	0.315685	FALSE	3996.34	0.470231	0.999981	FALSE	92.1761	-1.41983	0.0290459	TRUE	236.41	0.72749	0.251865	FALSE
ENSG00000064703	DDX20	chr1:112297866-112310638	chr1:112295366-112300366	2226.05	0.0495469	0.852645	FALSE	2176.04	0.0294958	0.808665	FALSE	2797.55	0.0113898	0.978455	FALSE	20.057	0.0233376	0.983195	FALSE	475.309	0.214493	0.238493	FALSE	11.7888	0.332199	NA	FALSE	342.166	0.0274164	0.959035	FALSE	30.6328	-0.00947621	0.999947	FALSE	719.517	-0.0565547	0.999981	FALSE	17.7404	-0.225454	NA	FALSE	435.739	0.0817809	0.986935	FALSE
ENSG00000064726	BTBD1	chr15:83685173-83736106	chr15:83733606-83738606	10332	-0.266495	0.240624	FALSE	7340.25	0.165009	0.307033	FALSE	10196.5	0.0180475	0.971009	FALSE	65.7744	0.59146	0.495756	FALSE	1663.51	0.249702	0.0324944	FALSE	7.60393	0.645976	NA	FALSE	325.204	-0.142053	0.738383	FALSE	98.2794	0.172634	0.999947	FALSE	2692.11	-0.0407851	0.999981	FALSE	18.0327	-0.223932	NA	FALSE	493.963	0.299727	0.914994	FALSE
ENSG00000064763	FAR2	chr12:29302035-29493913	chr12:29299535-29304535	2024.03	-0.331077	0.028822	FALSE	1194.12	-0.718959	0.0125774	FALSE	916.052	0.0623236	0.910101	FALSE	686.365	0.569773	0.293664	FALSE	2667.38	-0.175607	0.230733	FALSE	21.0979	0.441388	0.612907	FALSE	169.092	0.271746	0.586795	FALSE	1123.95	0.651074	0.999947	FALSE	4245.29	-0.0903638	0.999981	FALSE	42.7669	0.691472	0.841248	FALSE	193.793	-0.662799	0.230957	FALSE
ENSG00000064787	BCAS1	chr20:52553315-52687304	chr20:52684804-52689804	16.0652	0.606603	0.221369	FALSE	24.7665	-0.459685	0.319681	FALSE	18.3352	0.107738	0.960274	FALSE	3852.36	0.240633	0.686327	FALSE	1057.59	-0.230025	0.233879	FALSE	24.4035	0.596081	0.394465	FALSE	38.396	-0.479279	0.413917	FALSE	1617.22	0.00917324	0.999947	FALSE	1743.13	0.112499	0.999981	FALSE	14.4891	0.0323844	NA	FALSE	25.9576	-0.0620443	0.990135	FALSE
ENSG00000064835	POU1F1	chr3:87308553-87325737	chr3:87323237-87328237	1.22248	0.289339	0.933054	FALSE	0.77212	0.772736	NA	FALSE	1.63169	-0.704646	NA	FALSE	472.922	-2.68933	1.24478e-09	TRUE	127.406	0.490156	0.0965074	FALSE	252.417	-3.07477	3.64157e-11	TRUE	12.9435	0.604075	NA	FALSE	59.5226	0.138516	0.999947	FALSE	342.963	0.34346	0.999981	FALSE	25.955	-0.0748874	0.999877	FALSE	6.62839	0.0897711	NA	FALSE
ENSG00000064886	CHI3L2	chr1:111743392-111786062	chr1:111740892-111745892	28.0802	1.76963	0.0139445	FALSE	27.5669	-2.22907	0.000788877	FALSE	28.2984	1.63241	0.00740327	FALSE	1009.51	-0.385589	0.453717	FALSE	265.668	0.232312	0.397829	FALSE	64.1326	0.349399	0.654855	FALSE	21.8871	0.150997	0.846703	FALSE	284.499	0.340133	0.999947	FALSE	649.704	-0.206041	0.999981	FALSE	30.6961	-0.0713224	0.999877	FALSE	18.3755	-0.170585	0.983306	FALSE
ENSG00000064932	SBNO2	chr19:1107635-1174282	chr19:1171782-1176782	5410.06	0.91232	0.000548851	FALSE	5344.53	-0.214467	0.0199891	FALSE	5533.59	0.205909	0.618374	FALSE	87.6347	0.442354	0.570117	FALSE	2634.08	0.19383	0.293117	FALSE	7.3437	0.490978	NA	FALSE	403.052	-0.0177878	0.973406	FALSE	128.619	0.0171806	0.999947	FALSE	4311.45	0.0742611	0.999981	FALSE	16.6052	-0.270255	NA	FALSE	667.348	-0.143061	0.980381	FALSE
ENSG00000064933	PMS1	chr2:190649106-190742355	chr2:190646606-190651606	1988.92	0.123285	0.596645	FALSE	2251.79	0.117722	0.507896	FALSE	1950.99	-0.137507	0.842202	FALSE	128.52	0.554792	0.473636	FALSE	2648.55	0.257142	0.0183035	FALSE	7.15001	0.718177	NA	FALSE	287.246	-0.302618	0.531997	FALSE	207.7	0.226393	0.999947	FALSE	4742.99	0.0252309	0.999981	FALSE	15.3472	0.0854067	NA	FALSE	486.793	0.195105	0.977023	FALSE
ENSG00000064961	HMG20B	chr19:3572774-3579086	chr19:3570274-3575274	4378.6	-0.598205	0.0112101	FALSE	4524.96	0.141011	0.50763	FALSE	2503.95	-0.00113435	0.999147	FALSE	8.71235	1.18972	0.16186	FALSE	239.719	0.0556261	0.823983	FALSE	8.18333	0.549501	NA	FALSE	289.596	-0.221414	0.587349	FALSE	14.413	-0.128231	0.999947	FALSE	368.053	0.22689	0.999981	FALSE	12.3452	-0.0810527	NA	FALSE	358.064	0.458986	0.651817	FALSE
ENSG00000064989	CALCRL	chr2:188207855-188313187	chr2:188310687-188315687	4476.85	3.07947	1.7353e-08	TRUE	3270.65	0.929871	0.522981	FALSE	287.18	-1.96591	0.000566417	TRUE	243.334	-0.0480671	0.952695	FALSE	1626.15	0.273182	0.16434	FALSE	10.6429	0.539723	NA	FALSE	94.9266	0.685805	0.212084	FALSE	314.54	0.262245	0.999947	FALSE	4347.89	0.49829	0.706699	FALSE	13.0716	0.105727	NA	FALSE	116.503	0.153065	0.986935	FALSE
ENSG00000064995	TAF11	chr6:34845554-34855866	chr6:34853366-34858366	2284.43	-0.392966	0.0295561	FALSE	2467.92	0.381208	1.2448e-08	FALSE	1589.88	-0.21754	0.684645	FALSE	13.2948	0.401828	0.682926	FALSE	301.988	0.10675	0.600747	FALSE	7.61665	0.447983	NA	FALSE	370.717	0.149043	0.758512	FALSE	14.5224	0.0241261	0.999947	FALSE	520.282	-0.0204219	0.999981	FALSE	16.176	-0.123868	NA	FALSE	475.8	0.119691	0.986935	FALSE
ENSG00000064999	ANKS1A	chr6:34857041-35059179	chr6:34854541-34859541	2290.34	0.0555339	0.725338	FALSE	2050.12	0.137942	0.476441	FALSE	3177.04	-0.123737	0.819709	FALSE	382.394	0.254428	0.691779	FALSE	4813.97	0.0170435	0.899059	FALSE	10.5315	0.273843	NA	FALSE	370.586	0.144583	0.766593	FALSE	422.097	0.20636	0.999947	FALSE	6672.88	-0.144583	0.999981	FALSE	19.2921	-0.113014	NA	FALSE	474.03	0.11858	0.986935	FALSE
ENSG00000065000	AP3D1	chr19:2100987-2164464	chr19:2161964-2166964	17840.4	-0.14523	0.417983	FALSE	13458.6	-0.0615895	0.491292	FALSE	25472.8	-0.167466	0.245932	FALSE	68.7514	0.612369	0.479906	FALSE	2470.61	0.0573971	0.737911	FALSE	6.72734	0.0381299	NA	FALSE	387.128	-0.28032	0.566095	FALSE	100.058	-0.0901207	0.999947	FALSE	3359.37	0.0724491	0.999981	FALSE	11.2348	-0.114008	NA	FALSE	597.076	0.276956	0.943909	FALSE
ENSG00000065029	ZNF76	chr6:35226685-35263762	chr6:35224185-35229185	1603.1	-0.140134	0.455393	FALSE	1335.09	0.0869147	0.55629	FALSE	1180.08	0.167058	0.817949	FALSE	55.3862	0.204347	0.794755	FALSE	1164.67	0.101663	0.50086	FALSE	9.00452	0.252866	NA	FALSE	474.62	0.103965	0.837094	FALSE	65.4589	-0.0296488	0.999947	FALSE	1392.39	-0.091874	0.999981	FALSE	12.2238	-0.337212	NA	FALSE	566.843	0.110132	0.986935	FALSE
ENSG00000065054	SLC9A3R2	chr16:2075356-2089027	chr16:2072856-2077856	3010.14	-0.528856	0.069391	FALSE	2396.95	0.185041	0.450728	FALSE	6763.92	0.482903	0.0144641	FALSE	20.454	0.581704	0.546608	FALSE	445.321	0.274435	0.160882	FALSE	6.97961	0.81599	NA	FALSE	144.725	-0.281011	0.510062	FALSE	34.5492	-0.349688	0.999947	FALSE	735.546	0.182703	0.999981	FALSE	16.7777	-0.171945	NA	FALSE	262.309	0.530808	0.615153	FALSE
ENSG00000065057	NTHL1	chr16:2089815-2097867	chr16:2095367-2100367	1084.11	0.666776	0.132804	FALSE	1395.36	0.630927	0.0019768	FALSE	385.678	0.670435	0.0936239	FALSE	13.8719	0.206645	0.836642	FALSE	253.866	0.361986	0.141011	FALSE	9.00152	0.122546	NA	FALSE	115.215	-0.134099	0.780503	FALSE	16.2439	-0.254397	0.999947	FALSE	413.823	0.260929	0.999981	FALSE	8.58346	0.0123834	NA	FALSE	155.191	0.430676	0.831411	FALSE
ENSG00000065060	UHRF1BP1	chr6:34759856-34850915	chr6:34757356-34762356	4679.2	-0.819816	0.0405578	FALSE	3840.28	0.108539	0.18078	FALSE	8148.28	-0.776612	3.0474e-05	FALSE	130.697	0.584649	0.401319	FALSE	2447.68	-0.216102	0.058579	FALSE	7.72336	0.811473	NA	FALSE	218.771	-0.538853	0.155376	FALSE	140.493	0.106087	0.999947	FALSE	3544.25	-0.122018	0.999981	FALSE	10.9034	-0.281188	NA	FALSE	323.683	0.191217	0.977023	FALSE
ENSG00000065135	GNAI3	chr1:110091232-110136975	chr1:110088732-110093732	12854.8	0.21666	0.419656	FALSE	11196.5	0.24869	0.0664832	FALSE	14091.2	-0.0846571	0.782256	FALSE	62.8368	0.48301	0.555002	FALSE	1360.18	0.326021	0.00829682	FALSE	6.32597	0.233453	NA	FALSE	366.174	-0.325249	0.479625	FALSE	77.8354	0.16755	0.999947	FALSE	2392.27	-0.0394317	0.999981	FALSE	16.5177	-0.275285	NA	FALSE	432.406	-0.0549267	0.988563	FALSE
ENSG00000065150	IPO5	chr13:98605911-98676551	chr13:98603411-98608411	26306.3	-0.758106	0.00158021	FALSE	24991.3	0.121632	0.546393	FALSE	49422.6	-0.151978	0.707603	FALSE	161.975	0.407035	0.560501	FALSE	2213.51	0.179569	0.177734	FALSE	19.0157	0.24097	0.781535	FALSE	26.5615	0.431349	0.471079	FALSE	149.843	0.0444141	0.999947	FALSE	3626.62	-0.0863196	0.999981	FALSE	10.6993	0.22925	NA	FALSE	39.5607	0.211762	0.977409	FALSE
ENSG00000065154	OAT	chr10:126085871-126107545	chr10:126105045-126110045	11620.4	-0.554447	0.0430485	FALSE	9212.91	-0.945595	0.000871826	FALSE	5176.1	-0.0909699	0.861368	FALSE	28.7819	0.438277	0.596361	FALSE	742.354	0.0195839	0.92379	FALSE	57.227	1.25872	0.00813982	TRUE	229.642	-0.478719	0.297472	FALSE	41.7208	0.0963408	0.999947	FALSE	1249.08	-0.311661	0.999981	FALSE	29.2712	0.17319	0.999877	FALSE	287.329	0.0672802	0.987452	FALSE
ENSG00000065183	WDR3	chr1:118472342-118509165	chr1:118469842-118474842	8020.43	0.949522	0.00800059	FALSE	5312.09	0.846789	5.11973e-05	FALSE	4718.09	0.189627	0.866952	FALSE	52.5362	0.866245	0.237717	FALSE	1606.7	0.379245	0.00935216	FALSE	9.53477	0.550346	NA	FALSE	195.958	0.0849632	0.866967	FALSE	69.3246	0.293606	0.999947	FALSE	2177.07	0.14497	0.999981	FALSE	12.9758	0.116292	NA	FALSE	198.45	0.392646	0.850996	FALSE
ENSG00000065243	PKN2	chr1:89149904-89301938	chr1:89147404-89152404	6813.03	-0.369409	0.161203	FALSE	7076.11	0.221824	0.348561	FALSE	9449.27	-0.529855	0.00113713	FALSE	189.776	0.694217	0.367206	FALSE	3921.24	0.101186	0.416886	FALSE	7.32682	0.302423	NA	FALSE	311.031	-0.504333	0.162138	FALSE	292.615	0.398465	0.999947	FALSE	8458.11	0.00395338	0.999981	FALSE	13.1158	-0.0200426	NA	FALSE	418.762	0.0985953	0.986935	FALSE
ENSG00000065268	WDR18	chr19:983173-994569	chr19:980673-985673	3104.57	0.0637615	0.806349	FALSE	2462.93	0.30453	0.00118263	FALSE	2879.68	0.0181226	0.988943	FALSE	13.7576	0.73048	0.454305	FALSE	488.468	0.0832693	0.714476	FALSE	7.66148	0.239338	NA	FALSE	301.969	-0.084728	0.857658	FALSE	23.5958	-0.147549	0.999947	FALSE	613.618	0.232064	0.999981	FALSE	13.0177	-0.498679	NA	FALSE	380.451	0.302911	0.921191	FALSE
ENSG00000065308	TRAM2	chr6:52362199-52441713	chr6:52439213-52444213	19639.1	-0.160205	0.689442	FALSE	16397.6	0.0646671	0.414022	FALSE	40150.8	-0.242479	0.648243	FALSE	104.278	0.604499	0.481698	FALSE	2689.11	0.356955	0.00358719	FALSE	9.09306	0.895354	NA	FALSE	559.397	-0.520698	0.195926	FALSE	169.497	-0.0886283	0.999947	FALSE	4888.15	-0.207239	0.999981	FALSE	20.7985	-0.388459	NA	FALSE	792.884	-0.0357033	0.993723	FALSE
ENSG00000065320	NTN1	chr17:8924858-9147317	chr17:8922358-8927358	212.703	-1.10081	0.0225306	TRUE	812.919	-0.785455	0.58253	FALSE	2033.7	1.38425	0.0850218	FALSE	9162.83	0.0932764	0.892246	FALSE	973.416	-0.585005	0.0505902	FALSE	260.606	0.404241	0.560136	FALSE	41.6301	-0.649846	0.279003	FALSE	5224.8	-0.117197	0.999947	FALSE	2173.86	0.0191417	0.999981	FALSE	359.965	-0.444381	0.999877	FALSE	119.81	0.0742388	0.986935	FALSE
ENSG00000065325	GLP2R	chr17:9725522-9795419	chr17:9723022-9728022	632.743	-3.60076	0.000472129	TRUE	147.622	-0.277836	0.644643	FALSE	150.074	-1.33523	0.00813311	TRUE	675	1.91708	1.66604e-05	TRUE	757.781	-0.66893	0.0106759	TRUE	42.299	1.39992	0.0092658	TRUE	25.0651	-0.378268	0.560463	FALSE	346.506	0.130919	0.999947	FALSE	1245.5	-0.02263	0.999981	FALSE	15.9753	-0.0334139	NA	FALSE	50.27	-0.404742	0.897548	FALSE
ENSG00000065328	MCM10	chr10:13203553-13253104	chr10:13201053-13206053	1973.36	-0.0733809	0.911567	FALSE	1882.19	0.348496	0.0358297	FALSE	3352.64	0.15462	0.82312	FALSE	64.3255	0.446713	0.583579	FALSE	1654.54	0.362223	0.0305623	FALSE	12.2413	0.272377	NA	FALSE	102.791	0.372115	0.439695	FALSE	68.2468	0.104721	0.999947	FALSE	1988.95	0.0752794	0.999981	FALSE	14.3998	-0.0777018	NA	FALSE	119.342	0.5946	0.512143	FALSE
ENSG00000065357	DGKA	chr12:56321102-56347811	chr12:56318602-56323602	2742.34	0.283516	0.23086	FALSE	1781.95	-0.134864	0.755475	FALSE	5773.92	-0.136447	0.827334	FALSE	33.1829	0.742746	0.38655	FALSE	878.984	0.234253	0.107172	FALSE	7.35114	0.310839	NA	FALSE	342.591	-0.311735	0.434272	FALSE	42.1933	0.179387	0.999947	FALSE	1433.55	-0.121367	0.999981	FALSE	12.5835	0.0990585	NA	FALSE	433.125	-0.0597891	0.987606	FALSE
ENSG00000065361	ERBB3	chr12:56473640-56497289	chr12:56471140-56476140	82.6461	-1.342	1.50467e-06	TRUE	453.295	-1.14518	5.40949e-10	TRUE	588.575	-0.662006	0.629739	FALSE	786.178	1.49568	8.56808e-06	TRUE	150.754	-0.500113	0.0564859	FALSE	41.3501	1.2118	0.0153139	TRUE	115.598	-0.306649	0.523435	FALSE	157.494	0.454181	0.999947	FALSE	537.983	-0.428159	0.999981	FALSE	19.0438	-0.0121778	NA	FALSE	247.942	0.0422285	0.993127	FALSE
ENSG00000065371	ROPN1	chr3:123687367-123711025	chr3:123708525-123713525	4.61391	1.08161	0.285403	FALSE	3.5121	-1.52576	0.207089	FALSE	3.28323	0.384561	NA	FALSE	943.04	0.334834	0.487395	FALSE	85.7062	-0.192124	0.521604	FALSE	207.58	0.523311	0.191942	FALSE	9.52317	0.163898	NA	FALSE	377.34	0.161034	0.999947	FALSE	146.973	-0.28133	0.999981	FALSE	73.2842	0.286483	0.999877	FALSE	6.17006	-0.015872	NA	FALSE
ENSG00000065413	ANKRD44	chr2:197831740-198175897	chr2:198173397-198178397	1441.64	0.296758	0.334702	FALSE	672.883	0.53733	0.19101	FALSE	900.078	0.35697	0.693626	FALSE	819.451	0.142416	0.824681	FALSE	5353.93	-0.0360721	0.819976	FALSE	39.1631	0.301198	0.657022	FALSE	134.167	-0.152089	0.790172	FALSE	1184.3	-0.221495	0.999947	FALSE	7305.21	0.25834	0.999981	FALSE	66.8192	-0.940096	0.42608	FALSE	205.314	0.492536	0.652636	FALSE
ENSG00000065427	KARS	chr16:75661621-75682541	chr16:75680041-75685041	13117.1	0.129828	0.700599	FALSE	11470.4	0.368041	0.000498491	FALSE	14219.8	0.109863	0.884949	FALSE	24.3865	0.585089	0.530014	FALSE	901.552	0.297626	0.0207203	FALSE	8.37441	0.798598	NA	FALSE	345.681	-0.50687	0.218812	FALSE	35.2896	0.22998	0.999947	FALSE	1173.65	-0.0972337	0.999981	FALSE	14.4624	-0.324546	NA	FALSE	458.024	0.169636	0.977409	FALSE
ENSG00000065457	ADAT1	chr16:75630878-75657198	chr16:75654698-75659698	3049.42	0.506477	0.0129595	FALSE	2475.26	0.326143	0.0424663	FALSE	4185.09	-0.0189081	0.982792	FALSE	29.0487	0.682322	0.443996	FALSE	1049.07	0.274663	0.0645213	FALSE	6.65622	0.620779	NA	FALSE	184.125	-0.12726	0.791519	FALSE	36.0792	0.195498	0.999947	FALSE	1480.36	-0.100384	0.999981	FALSE	11.2278	0.282435	NA	FALSE	240.8	0.148079	0.98369	FALSE
ENSG00000065485	PDIA5	chr3:122785908-122944074	chr3:122783408-122788408	4809.98	0.0034208	0.993006	FALSE	2462.62	-0.584336	0.000346533	FALSE	3516.93	-0.357682	0.191058	FALSE	321.477	0.153788	0.815637	FALSE	5310.65	0.170871	0.146392	FALSE	11.3395	-0.552011	NA	FALSE	174.366	-0.248264	0.556403	FALSE	284.543	-0.0106499	0.999947	FALSE	6426.8	-0.257026	0.999981	FALSE	16.1933	-0.366044	NA	FALSE	239.585	0.35367	0.907883	FALSE
ENSG00000065491	TBC1D22B	chr6:37225547-37300746	chr6:37223047-37228047	1048.61	-0.398641	0.0320349	FALSE	1205.45	-0.210814	0.0850376	FALSE	2775.58	-0.570005	0.00124037	FALSE	106.009	0.555934	0.488651	FALSE	2476.95	0.121776	0.340274	FALSE	18.2249	0.327449	0.696205	FALSE	267.953	0.0669116	0.908132	FALSE	121.957	0.180876	0.999947	FALSE	4268.11	-0.234315	0.999981	FALSE	14.5857	-0.188414	NA	FALSE	560.913	-0.195507	0.977023	FALSE
ENSG00000065518	NDUFB4	chr3:120315155-120321347	chr3:120312655-120317655	2713.87	-0.251903	0.586522	FALSE	1450.04	0.121266	0.412335	FALSE	3235.11	0.0306914	0.927951	FALSE	9.16151	0.737613	0.458172	FALSE	218.42	0.414749	0.0594489	FALSE	35.2624	-0.472456	0.481507	FALSE	155.174	-0.0160441	0.97801	FALSE	11.434	-0.0563741	0.999947	FALSE	334.103	-0.140014	0.999981	FALSE	12.8844	-0.318206	NA	FALSE	178.694	-0.128655	0.986935	FALSE
ENSG00000065526	SPEN	chr1:16174358-16266955	chr1:16171858-16176858	2729.32	0.63524	0.0777894	FALSE	1678.96	-0.244944	0.267338	FALSE	16085	-0.268257	0.244304	FALSE	117.324	0.615196	0.458164	FALSE	2581.34	0.260492	0.0277159	FALSE	6.42211	0.694917	NA	FALSE	658.409	-0.505042	0.299282	FALSE	166.704	0.0507378	0.999947	FALSE	4218.49	-0.128337	0.999981	FALSE	17.6615	-0.603585	NA	FALSE	850.994	0.1499	0.977409	FALSE
ENSG00000065534	MYLK	chr3:123328895-123603178	chr3:123600678-123605678	20176	1.82905	7.04814e-12	TRUE	33826	-0.892345	1.62058e-13	FALSE	23244	-0.336334	0.606132	FALSE	647.408	0.128717	0.847466	FALSE	7049.31	0.527901	3.15138e-05	FALSE	31.0932	-0.339818	0.628409	FALSE	56.1584	0.421738	0.424557	FALSE	519.062	-0.054657	0.999947	FALSE	16235.2	-0.380303	0.999981	FALSE	16.9066	-0.0975089	NA	FALSE	226.013	0.0658132	0.987606	FALSE
ENSG00000065548	ZC3H15	chr2:187350882-187374090	chr2:187348382-187353382	5745.64	-0.0609894	0.862571	FALSE	5503.85	0.0931535	0.336986	FALSE	6348.29	0.129319	0.807768	FALSE	33.1364	0.591762	0.525493	FALSE	870.138	0.207139	0.203477	FALSE	8.01943	-0.38108	NA	FALSE	424.749	0.0149492	0.9796	FALSE	43.5497	0.0212494	0.999947	FALSE	1505.64	0.0278154	0.999981	FALSE	16.8531	-0.417997	NA	FALSE	395.196	0.110966	0.986935	FALSE
ENSG00000065559	MAP2K4	chr17:11924140-12047147	chr17:11921640-11926640	3752.28	-0.659979	2.63778e-05	FALSE	3341.86	0.0891958	0.554161	FALSE	6854.49	-0.058549	0.900102	FALSE	180.588	0.539162	0.486754	FALSE	3227.17	0.129666	0.277648	FALSE	46.7373	0.378272	0.546325	FALSE	281.202	-0.333116	0.439217	FALSE	234.852	0.261313	0.999947	FALSE	5284.14	-0.0396054	0.999981	FALSE	23.3851	-0.196933	NA	FALSE	463.805	0.128739	0.986231	FALSE
ENSG00000065600	TMEM206	chr1:212537272-212588243	chr1:212585743-212590743	1081.59	-0.538993	0.0166915	FALSE	956.083	0.362041	0.0739773	FALSE	1771.57	0.0214094	0.973831	FALSE	77.312	0.495477	0.476139	FALSE	1221.63	0.0609182	0.687634	FALSE	20.7142	-0.0146515	0.988808	FALSE	66.0657	0.56525	0.221573	FALSE	67.8734	0.182859	0.999947	FALSE	1474.08	-0.0310128	0.999981	FALSE	19.0781	-0.0831139	NA	FALSE	76.5974	0.460431	0.809552	FALSE
[truncated: 59,286 more rows]
